# Supplementary material for: Collagen Type I Improves the Differentiation of Human Embryonic Stem Cells towards Definitive Endoderm
Source: PLoS One. 2015 Dec 29;10(12):e0145389. doi: 10.1371/journal.pone.0145389 (PMC4694921; doi:10.1371/journal.pone.0145389)
Supplement: S6 Table — Gene expression in cell on Col 1 compared to the gene expression in cells on Fn. (XLSX) [file pone.0145389.s010.xlsx]

## Sheet: Ark1
Col1 vs Fn
Ensembl_gene_ID	Gene_name	UniProt_ID	UniProt_accession	Probe_ID	log2 Fold Change	Average Expression	t statistic	p-Value	BH-adusted p-Value	Bonferroni corrected p-value
ENSG00000168234	TTC39C	TT39C_HUMAN	Q8N584	A_32_P155052	-1.16429	8.98028	-11.4014	4.69538e-09	0.000124046	0.000192947
ENSG00000106631	MYL7	MLRA_HUMAN	Q01449	A_23_P59738	1.03194	14.5666	11.2016	6.03731e-09	0.000124046	0.000248091
ENSG00000204531	POU5F1	PO5F1_HUMAN	Q01860	A_32_P132563	-1.46975	13.8554	-10.6071	1.30282e-08	0.000135832	0.000535369
ENSG00000206454	POU5F1	PO5F1_HUMAN	Q01860	A_32_P132563	-1.46975	13.8554	-10.6071	1.30282e-08	0.000135832	0.000535369
ENSG00000235068	POU5F1	PO5F1_HUMAN	Q01860	A_32_P132563	-1.46975	13.8554	-10.6071	1.30282e-08	0.000135832	0.000535369
ENSG00000235602	-	-	-	A_32_P132563	-1.46975	13.8554	-10.6071	1.30282e-08	0.000135832	0.000535369
ENSG00000229094	POU5F1	PO5F1_HUMAN	Q01860	A_32_P132563	-1.46975	13.8554	-10.6071	1.30282e-08	0.000135832	0.000535369
ENSG00000237582	POU5F1	PO5F1_HUMAN	Q01860	A_32_P132563	-1.46975	13.8554	-10.6071	1.30282e-08	0.000135832	0.000535369
ENSG00000233911	POU5F1	PO5F1_HUMAN	Q01860	A_32_P132563	-1.46975	13.8554	-10.6071	1.30282e-08	0.000135832	0.000535369
ENSG00000237872	-	-	-	A_32_P132563	-1.46975	13.8554	-10.6071	1.30282e-08	0.000135832	0.000535369
ENSG00000230336	POU5F1	PO5F1_HUMAN	Q01860	A_32_P132563	-1.46975	13.8554	-10.6071	1.30282e-08	0.000135832	0.000535369
ENSG00000163638	ADAMTS9	ATS9_HUMAN	Q9P2N4	A_32_P196263	1.29646	9.5031	10.2555	2.0861e-08	0.000135832	0.000857241
ENSG00000204531	POU5F1	PO5F1_HUMAN	Q01860	A_24_P144601	-1.39977	14.0716	-10.1926	2.27203e-08	0.000135832	0.000933646
ENSG00000206454	POU5F1	PO5F1_HUMAN	Q01860	A_24_P144601	-1.39977	14.0716	-10.1926	2.27203e-08	0.000135832	0.000933646
ENSG00000235068	POU5F1	PO5F1_HUMAN	Q01860	A_24_P144601	-1.39977	14.0716	-10.1926	2.27203e-08	0.000135832	0.000933646
ENSG00000212993	POU5F1B	P5F1B_HUMAN	Q06416	A_24_P144601	-1.39977	14.0716	-10.1926	2.27203e-08	0.000135832	0.000933646
ENSG00000235602	-	-	-	A_24_P144601	-1.39977	14.0716	-10.1926	2.27203e-08	0.000135832	0.000933646
ENSG00000229094	POU5F1	PO5F1_HUMAN	Q01860	A_24_P144601	-1.39977	14.0716	-10.1926	2.27203e-08	0.000135832	0.000933646
ENSG00000237582	POU5F1	PO5F1_HUMAN	Q01860	A_24_P144601	-1.39977	14.0716	-10.1926	2.27203e-08	0.000135832	0.000933646
ENSG00000233911	POU5F1	PO5F1_HUMAN	Q01860	A_24_P144601	-1.39977	14.0716	-10.1926	2.27203e-08	0.000135832	0.000933646
ENSG00000230336	POU5F1	PO5F1_HUMAN	Q01860	A_24_P144601	-1.39977	14.0716	-10.1926	2.27203e-08	0.000135832	0.000933646
ENSG00000162949	CAPN13	CAN13_HUMAN	Q6MZZ7	A_24_P336983	0.827232	10.0469	10.1793	2.31384e-08	0.000135832	0.000950826
ENSG00000168234	TTC39C	TT39C_HUMAN	Q8N584	A_23_P308305	-1.33056	10.0517	-9.8231	3.78504e-08	0.000179526	0.00155539
ENSG00000092421	SEMA6A	SEM6A_HUMAN	Q9H2E6	A_23_P312840	-1.3039	10.3593	-9.79594	3.93189e-08	0.000179526	0.00161573
ENSG00000257017	HP	HPT_HUMAN	P00738	A_23_P206760	1.34608	10.543	9.50037	5.98031e-08	0.000224592	0.00245749
ENSG00000261701	HPR	HPTR_HUMAN	P00739	A_23_P206760	1.34608	10.543	9.50037	5.98031e-08	0.000224592	0.00245749
ENSG00000204531	POU5F1	PO5F1_HUMAN	Q01860	A_24_P214841	-1.32802	14.0781	-9.49669	6.01201e-08	0.000224592	0.00247052
ENSG00000206454	POU5F1	PO5F1_HUMAN	Q01860	A_24_P214841	-1.32802	14.0781	-9.49669	6.01201e-08	0.000224592	0.00247052
ENSG00000235068	POU5F1	PO5F1_HUMAN	Q01860	A_24_P214841	-1.32802	14.0781	-9.49669	6.01201e-08	0.000224592	0.00247052
ENSG00000212993	POU5F1B	P5F1B_HUMAN	Q06416	A_24_P214841	-1.32802	14.0781	-9.49669	6.01201e-08	0.000224592	0.00247052
ENSG00000235602	-	-	-	A_24_P214841	-1.32802	14.0781	-9.49669	6.01201e-08	0.000224592	0.00247052
ENSG00000229094	POU5F1	PO5F1_HUMAN	Q01860	A_24_P214841	-1.32802	14.0781	-9.49669	6.01201e-08	0.000224592	0.00247052
ENSG00000237582	POU5F1	PO5F1_HUMAN	Q01860	A_24_P214841	-1.32802	14.0781	-9.49669	6.01201e-08	0.000224592	0.00247052
ENSG00000233911	POU5F1	PO5F1_HUMAN	Q01860	A_24_P214841	-1.32802	14.0781	-9.49669	6.01201e-08	0.000224592	0.00247052
ENSG00000230336	POU5F1	PO5F1_HUMAN	Q01860	A_24_P214841	-1.32802	14.0781	-9.49669	6.01201e-08	0.000224592	0.00247052
ENSG00000180209	MYLPF	MLRS_HUMAN	Q96A32	A_23_P60742	1.1629	11.2532	9.34712	7.46042e-08	0.000235054	0.00306571
ENSG00000131094	C1QL1	C1QRF_HUMAN	O75973	A_23_P77993	-0.788786	8.02437	-9.33397	7.6043e-08	0.000235054	0.00312484
ENSG00000204531	POU5F1	PO5F1_HUMAN	Q01860	A_24_P340659	-1.39946	13.4644	-9.2639	8.4215e-08	0.000235054	0.00346065
ENSG00000206454	POU5F1	PO5F1_HUMAN	Q01860	A_24_P340659	-1.39946	13.4644	-9.2639	8.4215e-08	0.000235054	0.00346065
ENSG00000235068	POU5F1	PO5F1_HUMAN	Q01860	A_24_P340659	-1.39946	13.4644	-9.2639	8.4215e-08	0.000235054	0.00346065
ENSG00000229094	POU5F1	PO5F1_HUMAN	Q01860	A_24_P340659	-1.39946	13.4644	-9.2639	8.4215e-08	0.000235054	0.00346065
ENSG00000237582	POU5F1	PO5F1_HUMAN	Q01860	A_24_P340659	-1.39946	13.4644	-9.2639	8.4215e-08	0.000235054	0.00346065
ENSG00000233911	POU5F1	PO5F1_HUMAN	Q01860	A_24_P340659	-1.39946	13.4644	-9.2639	8.4215e-08	0.000235054	0.00346065
ENSG00000237872	-	-	-	A_24_P340659	-1.39946	13.4644	-9.2639	8.4215e-08	0.000235054	0.00346065
ENSG00000230336	POU5F1	PO5F1_HUMAN	Q01860	A_24_P340659	-1.39946	13.4644	-9.2639	8.4215e-08	0.000235054	0.00346065
ENSG00000204531	POU5F1	PO5F1_HUMAN	Q01860	A_23_P59138	-1.17057	16.8114	-9.23706	8.75865e-08	0.000235054	0.00359919
ENSG00000212993	POU5F1B	P5F1B_HUMAN	Q06416	A_23_P59138	-1.17057	16.8114	-9.23706	8.75865e-08	0.000235054	0.00359919
ENSG00000235602	-	-	-	A_23_P59138	-1.17057	16.8114	-9.23706	8.75865e-08	0.000235054	0.00359919
ENSG00000237872	-	-	-	A_23_P59138	-1.17057	16.8114	-9.23706	8.75865e-08	0.000235054	0.00359919
ENSG00000181449	SOX2	SOX2_HUMAN	P48431	A_24_P379969	-1.33352	11.7679	-9.20667	9.15742e-08	0.000235054	0.00376306
ENSG00000168234	TTC39C	TT39C_HUMAN	Q8N584	A_32_P123629	-1.05649	11.1581	-9.1591	9.82065e-08	0.000235054	0.0040356
ENSG00000164318	EGFLAM	EGFLA_HUMAN	Q63HQ2	A_23_P144911	0.798343	9.40555	9.10793	1.05908e-07	0.000235054	0.00435207
ENSG00000127824	TUBA4A	TBA4A_HUMAN	P68366	A_23_P84448	-0.832795	9.28875	-9.09045	1.08681e-07	0.000235054	0.00446602
ENSG00000243910	-	-	-	A_23_P84448	-0.832795	9.28875	-9.09045	1.08681e-07	0.000235054	0.00446602
ENSG00000131370	SH3BP5	3BP5_HUMAN	O60239	A_23_P143964	0.787731	10.5762	9.05324	1.14845e-07	0.000235967	0.00471934
ENSG00000121316	PLBD1	PLBL1_HUMAN	Q6P4A8	A_23_P87709	-0.797528	10.1903	-8.92078	1.3994e-07	0.000259916	0.00575057
ENSG00000144810	COL8A1	CO8A1_HUMAN	P27658	A_24_P139152	1.07921	9.35487	8.91453	1.41259e-07	0.000259916	0.00580476
ENSG00000162949	CAPN13	CAN13_HUMAN	Q6MZZ7	A_23_P101972	0.910328	10.3879	8.89494	1.45477e-07	0.000259916	0.00597807
ENSG00000173320	STOX2	STOX2_HUMAN	Q9P2F5	A_24_P163237	-1.18304	10.5798	-8.86531	1.52107e-07	0.000260438	0.00625052
ENSG00000162909	CAPN2	CAN2_HUMAN	P17655	A_23_P23924	0.604277	13.4431	8.82263	1.62223e-07	0.00026665	0.00666624
ENSG00000112773	FAM46A	FA46A_HUMAN	Q96IP4	A_23_P70660	0.96087	10.1056	8.74553	1.82333e-07	0.000272411	0.00749263
ENSG00000132669	RIN2	RIN2_HUMAN	Q8WYP3	A_24_P305570	0.62287	8.41543	8.73758	1.84549e-07	0.000272411	0.00758368
ENSG00000154153	FAM134B	F134B_HUMAN	Q9H6L5	A_23_P167599	0.647461	9.38208	8.72343	1.88567e-07	0.000272411	0.00774879
ENSG00000144810	COL8A1	CO8A1_HUMAN	P27658	A_23_P69030	0.926178	10.5477	8.71075	1.92245e-07	0.000272411	0.00789993
ENSG00000152377	SPOCK1	TICN1_HUMAN	Q08629	A_24_P354689	1.01677	10.2267	8.68314	2.00519e-07	0.000274664	0.00823992
ENSG00000111817	DSE	DSE_HUMAN	Q9UL01	A_23_P19226	-0.799397	11.3753	-8.50389	2.64181e-07	0.000350194	0.010856
ENSG00000196090	PTPRT	PTPRT_HUMAN	O14522	A_32_P36404	0.807282	8.21945	8.44153	2.91043e-07	0.000355449	0.0119598
ENSG00000100311	PDGFB	PDGFB_HUMAN	P01127	A_24_P339944	-0.908915	8.89267	-8.42237	2.99862e-07	0.000355449	0.0123222
ENSG00000269404	SPIB	SPIB_HUMAN	Q01892	A_23_P39067	-1.21502	9.59296	-8.41707	3.0235e-07	0.000355449	0.0124245
ENSG00000007171	NOS2	NOS2_HUMAN	P35228	A_23_P502464	1.37798	8.06158	8.41623	3.02746e-07	0.000355449	0.0124407
ENSG00000263639	MSMB	MSMB_HUMAN	P08118	A_23_P75024	0.584782	9.40013	8.36719	3.26857e-07	0.000373098	0.0134315
ENSG00000133083	DCLK1	DCLK1_HUMAN	O15075	A_23_P369994	-0.951915	10.4313	-8.31234	3.56231e-07	0.000393791	0.0146386
ENSG00000134709	HOOK1	HOOK1_HUMAN	Q9UJC3	A_23_P114879	-0.660405	8.60768	-8.2897	3.69152e-07	0.000393791	0.0151695
ENSG00000182866	LCK	LCK_HUMAN	P06239	A_23_P103361	-1.10593	8.9802	-8.28188	3.73734e-07	0.000393791	0.0153578
ENSG00000124215	CDH26	CAD26_HUMAN	Q8IXH8	A_23_P502957	-0.785121	7.99079	-8.25271	3.91338e-07	0.000398269	0.0160813
ENSG00000166426	CRABP1	RABP1_HUMAN	P29762	A_23_P117882	-0.941204	12.1819	-8.24303	3.97368e-07	0.000398269	0.016329
ENSG00000198336	MYL4	MYL4_HUMAN	P12829	A_24_P151032	1.06	10.7892	8.20668	4.20908e-07	0.000402716	0.0172964
ENSG00000084628	NKAIN1	NKAI1_HUMAN	Q4KMZ8	A_23_P51376	-0.937788	10.7224	-8.20594	4.21404e-07	0.000402716	0.0173168
ENSG00000198336	MYL4	MYL4_HUMAN	P12829	A_24_P188218	1.23306	13.4307	8.14427	4.64797e-07	0.000410303	0.0190999
ENSG00000196581	AJAP1	AJAP1_HUMAN	Q9UKB5	A_23_P23155	0.678485	11.2321	8.13605	4.70931e-07	0.000410303	0.019352
ENSG00000144810	COL8A1	CO8A1_HUMAN	P27658	A_23_P211762	0.640939	8.07251	8.13598	4.70979e-07	0.000410303	0.0193539
ENSG00000167600	CYP2S1	CP2S1_HUMAN	Q96SQ9	A_23_P101374	-1.14054	10.6337	-8.12674	4.77973e-07	0.000410303	0.0196414
ENSG00000102312	PORCN	PORCN_HUMAN	Q9H237	A_23_P11071	0.709269	14.647	8.12504	4.79268e-07	0.000410303	0.0196945
ENSG00000147155	EBP	EBP_HUMAN	Q15125	A_23_P11071	0.709269	14.647	8.12504	4.79268e-07	0.000410303	0.0196945
ENSG00000008311	AASS	AASS_HUMAN	Q9UDR5	A_23_P8754	-0.870794	11.228	-8.09719	5.01072e-07	0.000419536	0.0205906
ENSG00000127831	VIL1	VILI_HUMAN	P09327	A_23_P16866	0.791131	11.4816	8.08471	5.11179e-07	0.000419536	0.0210059
ENSG00000132938	MTUS2	MTUS2_HUMAN	Q5JR59	A_23_P334308	0.630197	8.19601	8.07321	5.2068e-07	0.000419536	0.0213963
ENSG00000156587	UBE2L6	UB2L6_HUMAN	O14933	A_23_P75741	-0.578312	8.9968	-8.04367	5.45941e-07	0.00043143	0.0224343
ENSG00000241476	SSX2	SSX2_HUMAN	Q16385	A_23_P33881	0.875375	11.2994	7.99669	5.88811e-07	0.000447931	0.024196
ENSG00000241476	SSX2B	SSX2_HUMAN	Q16385	A_23_P33881	0.875375	11.2994	7.99669	5.88811e-07	0.000447931	0.024196
ENSG00000268447	SSX2	SSX2_HUMAN	Q16385	A_23_P33881	0.875375	11.2994	7.99669	5.88811e-07	0.000447931	0.024196
ENSG00000268447	SSX2B	SSX2_HUMAN	Q16385	A_23_P33881	0.875375	11.2994	7.99669	5.88811e-07	0.000447931	0.024196
ENSG00000227302	-	-	-	A_23_P33881	0.875375	11.2994	7.99669	5.88811e-07	0.000447931	0.024196
ENSG00000171483	SSX6	SSX6_HUMAN	Q7RTT6	A_23_P33881	0.875375	11.2994	7.99669	5.88811e-07	0.000447931	0.024196
ENSG00000268009	SSX4	SSX4_HUMAN	O60224	A_23_P33881	0.875375	11.2994	7.99669	5.88811e-07	0.000447931	0.024196
ENSG00000268009	SSX4B	SSX4_HUMAN	O60224	A_23_P33881	0.875375	11.2994	7.99669	5.88811e-07	0.000447931	0.024196
ENSG00000269791	SSX4	SSX4_HUMAN	O60224	A_23_P33881	0.875375	11.2994	7.99669	5.88811e-07	0.000447931	0.024196
ENSG00000269791	SSX4B	SSX4_HUMAN	O60224	A_23_P33881	0.875375	11.2994	7.99669	5.88811e-07	0.000447931	0.024196
ENSG00000131981	LGALS3	LEG3_HUMAN	P17931	A_23_P128919	-0.984869	10.6648	-7.98991	5.95284e-07	0.000447931	0.024462
ENSG00000145423	SFRP2	SFRP2_HUMAN	Q96HF1	A_24_P934546	-1.25768	11.0318	-7.98551	5.99523e-07	0.000447931	0.0246362
ENSG00000187098	MITF	MITF_HUMAN	O75030	A_23_P426663	0.609494	8.59583	7.89916	6.89464e-07	0.000492486	0.0283321
ENSG00000187098	MITF-C	MITF_HUMAN	O75030	A_23_P426663	0.609494	8.59583	7.89916	6.89464e-07	0.000492486	0.0283321
ENSG00000067715	SYT1	SYT1_HUMAN	P21579	A_23_P36795	-1.00379	9.02928	-7.89014	6.99643e-07	0.000492486	0.0287504
ENSG00000183049	CAMK1D	KCC1D_HUMAN	Q8IU85	A_32_P208120	-0.605358	9.65657	-7.87705	7.14687e-07	0.000492486	0.0293687
ENSG00000183654	2011-03-01	MARHB_HUMAN	A6NNE9	A_24_P33508	0.688161	10.1683	7.87624	7.1563e-07	0.000492486	0.0294074
ENSG00000243910	-	-	-	A_23_P102109	-0.996475	10.4134	-7.82676	7.75752e-07	0.000492486	0.031878
ENSG00000123080	CDKN2C	CDN2C_HUMAN	P42773	A_23_P85460	0.85259	9.90069	7.81138	7.955e-07	0.000492486	0.0326895
ENSG00000163032	VSNL1	VISL1_HUMAN	P62760	A_23_P209978	-1.13309	9.60013	-7.80884	7.98809e-07	0.000492486	0.0328255
ENSG00000119508	NR4A3	NR4A3_HUMAN	Q92570	A_23_P398566	0.685725	9.15816	7.80391	8.05281e-07	0.000492486	0.0330914
ENSG00000134324	LPIN1	LPIN1_HUMAN	Q14693	A_32_P52609	0.636798	10.2636	7.7916	8.21679e-07	0.000492486	0.0337652
ENSG00000183688	FAM101B	F101B_HUMAN	Q8N5W9	A_24_P299318	-1.07106	11.1566	-7.77182	8.48751e-07	0.000492486	0.0348777
ENSG00000109099	PMP22	PMP22_HUMAN	Q01453	A_23_P100711	0.532819	9.95568	7.77125	8.49555e-07	0.000492486	0.0349107
ENSG00000166387	PPFIBP2	LIPB2_HUMAN	Q8ND30	A_23_P150807	0.757999	11.6115	7.75615	8.70875e-07	0.000492486	0.0357869
ENSG00000273173	SNURF	SNURF_HUMAN	Q9Y675	A_23_P77066	-0.619798	13.0523	-7.74878	8.81478e-07	0.000492486	0.0362226
ENSG00000128739	SNRPN	RSMN_HUMAN	P63162	A_23_P77066	-0.619798	13.0523	-7.74878	8.81478e-07	0.000492486	0.0362226
ENSG00000124194	GDAP1L1	GD1L1_HUMAN	Q96MZ0	A_23_P17354	-0.748082	8.39104	-7.74859	8.81761e-07	0.000492486	0.0362342
ENSG00000147601	TERF1	TERF1_HUMAN	P54274	A_23_P216149	-0.782879	13.7612	-7.74518	8.86708e-07	0.000492486	0.0364375
ENSG00000173231	-	-	-	A_23_P216149	-0.782879	13.7612	-7.74518	8.86708e-07	0.000492486	0.0364375
ENSG00000187589	-	-	-	A_23_P216149	-0.782879	13.7612	-7.74518	8.86708e-07	0.000492486	0.0364375
ENSG00000148926	ADM	ADML_HUMAN	P35318	A_23_P127948	0.700082	13.7922	7.73481	9.01967e-07	0.000492486	0.0370645
ENSG00000183688	FAM101B	F101B_HUMAN	Q8N5W9	A_24_P32151	-0.854144	8.75424	-7.71957	9.24886e-07	0.000492486	0.0380063
ENSG00000100078	PLA2G3	PA2G3_HUMAN	Q9NZ20	A_23_P17814	-0.717976	9.74934	-7.71912	9.25567e-07	0.000492486	0.0380343
ENSG00000114315	HES1	HES1_HUMAN	Q14469	A_23_P17998	-1.44904	10.543	-7.71675	9.29186e-07	0.000492486	0.038183
ENSG00000167654	ATCAY	ATCAY_HUMAN	Q86WG3	A_23_P101671	-0.846437	10.2117	-7.71306	9.34864e-07	0.000492486	0.0384164
ENSG00000008516	MMP25	MMP25_HUMAN	Q9NPA2	A_23_P376557	-0.784482	9.79075	-7.70532	9.46873e-07	0.000492486	0.0389099
ENSG00000008516	mmp20	MMP25_HUMAN	Q9NPA2	A_23_P376557	-0.784482	9.79075	-7.70532	9.46873e-07	0.000492486	0.0389099
ENSG00000105894	PTN	PTN_HUMAN	P21246	A_23_P303087	0.808063	12.4617	7.70142	9.52975e-07	0.000492486	0.0391606
ENSG00000187608	ISG15	ISG15_HUMAN	P05161	A_23_P819	0.72765	13.5093	7.69774	9.58773e-07	0.000492486	0.0393989
ENSG00000130768	SMPDL3B	ASM3B_HUMAN	Q92485	A_23_P160881	-1.06244	9.94204	-7.67205	1.00034e-06	0.000507493	0.0411069
ENSG00000181449	SOX2	SOX2_HUMAN	P48431	A_23_P401055	-1.27871	12.7554	-7.65692	1.0257e-06	0.000512119	0.0421489
ENSG00000253320	-	-	-	A_32_P2883	-0.851378	8.41801	-7.65084	1.03608e-06	0.000512119	0.0425755
ENSG00000111704	NANOG	NANOG_HUMAN	Q9H9S0	A_23_P204640	-1.30109	13.6059	-7.64007	1.05472e-06	0.000512119	0.0433418
ENSG00000255192	-	-	-	A_23_P204640	-1.30109	13.6059	-7.64007	1.05472e-06	0.000512119	0.0433418
ENSG00000175206	NPPA	ANF_HUMAN	P01160	A_23_P74059	1.10286	8.1855	7.63746	1.05931e-06	0.000512119	0.0435301
ENSG00000127824	TUBA4A	TBA4A_HUMAN	P68366	A_23_P154065	-1.24108	11.3288	-7.62834	1.07546e-06	0.000513881	0.0441938
ENSG00000125414	MYH2	MYH2_HUMAN	Q9UKX2	A_23_P38271	-1.10506	9.12846	-7.5777	1.16992e-06	0.000552593	0.0480756
ENSG00000170412	GPRC5C	GPC5C_HUMAN	Q9NQ84	A_23_P38167	0.731976	14.2306	7.57003	1.18496e-06	0.000553338	0.0486937
ENSG00000172318	B3GALT1	B3GT1_HUMAN	Q9Y5Z6	A_32_P154361	-0.917123	9.46621	-7.55533	1.21438e-06	0.000560701	0.0499024
ENSG00000102755	FLT1	VGFR1_HUMAN	P17948	A_24_P576191	-0.754489	8.96881	-7.53486	1.2566e-06	0.000572569	0.0516374
ENSG00000134686	PHC2	PHC2_HUMAN	Q8IXK0	A_23_P423864	0.572171	11.7773	7.51182	1.306e-06	0.000577068	0.0536673
ENSG00000112159	MDN1	MDN1_HUMAN	Q9NU22	A_23_P365060	-0.647121	9.00848	-7.50074	1.33045e-06	0.000581617	0.054672
ENSG00000101098	RIMS4	RIMS4_HUMAN	Q9H426	A_32_P38645	-0.821267	8.4576	-7.47364	1.39233e-06	0.000601505	0.0572152
ENSG00000175077	RTP1	RTP1_HUMAN	P59025	A_23_P155407	-0.67947	8.3245	-7.46816	1.40521e-06	0.000601505	0.0577445
ENSG00000232301	-	-	-	A_32_P211752	-1.23244	12.6837	-7.4345	1.4871e-06	0.000620746	0.0611092
ENSG00000104312	RIPK2	RIPK2_HUMAN	O43353	A_23_P252106	0.629368	12.4158	7.41854	1.52764e-06	0.000620746	0.0627753
ENSG00000120937	NPPB	ANFB_HUMAN	P16860	A_23_P62752	0.8342	16.2718	7.41723	1.53103e-06	0.000620746	0.0629145
ENSG00000136014	USP44	UBP44_HUMAN	Q9H0E7	A_23_P72770	-1.19826	9.66789	-7.41611	1.53392e-06	0.000620746	0.0630333
ENSG00000166033	HTRA1	HTRA1_HUMAN	Q92743	A_23_P97990	-0.895384	9.5539	-7.41346	1.5408e-06	0.000620746	0.0633161
ENSG00000039068	CDH1	CADH1_HUMAN	P12830	A_23_P206359	-0.991749	11.3545	-7.39628	1.58615e-06	0.000627603	0.0651797
ENSG00000074370	ATP2A3	AT2A3_HUMAN	Q93084	A_23_P207632	-0.612647	7.77931	-7.3939	1.59254e-06	0.000627603	0.0654423
ENSG00000224025	-	-	-	A_24_P871726	-0.602562	8.87945	-7.38979	1.60364e-06	0.000627603	0.0658983
ENSG00000178726	THBD	TRBM_HUMAN	P07204	A_23_P91390	0.613271	8.60478	7.37198	1.65269e-06	0.000640697	0.0679139
ENSG00000237289	CKMT1A	KCRU_HUMAN	P12532	A_23_P163235	-0.806595	9.17513	-7.344	1.73295e-06	0.000660745	0.0712122
ENSG00000237289	CKMT1B	KCRU_HUMAN	P12532	A_23_P163235	-0.806595	9.17513	-7.344	1.73295e-06	0.000660745	0.0712122
ENSG00000223572	CKMT1A	KCRU_HUMAN	P12532	A_23_P163235	-0.806595	9.17513	-7.344	1.73295e-06	0.000660745	0.0712122
ENSG00000223572	CKMT1B	KCRU_HUMAN	P12532	A_23_P163235	-0.806595	9.17513	-7.344	1.73295e-06	0.000660745	0.0712122
ENSG00000113645	WWC1	KIBRA_HUMAN	Q8IX03	A_23_P81392	-0.594673	9.72951	-7.34278	1.73656e-06	0.000660745	0.0713605
ENSG00000092421	SEMA6A	SEM6A_HUMAN	Q9H2E6	A_24_P213478	-0.80453	9.33891	-7.32817	1.78016e-06	0.000671121	0.0731522
ENSG00000138685	FGF2	FGF2_HUMAN	P09038	A_23_P218918	-1.22255	9.95685	-7.29456	1.8849e-06	0.000693669	0.0774562
ENSG00000196141	DKFZP564A2416	SPS2L_HUMAN	Q9NUQ6	A_23_P131255	-1.2164	13.541	-7.29278	1.89061e-06	0.000693669	0.077691
ENSG00000196141	SPATS2L	SPS2L_HUMAN	Q9NUQ6	A_23_P131255	-1.2164	13.541	-7.29278	1.89061e-06	0.000693669	0.077691
ENSG00000131370	SH3BP5	3BP5_HUMAN	O60239	A_24_P148750	0.551291	9.66381	7.27616	1.94495e-06	0.000707291	0.0799239
ENSG00000005059	CCDC109B	MCUB_HUMAN	Q9NWR8	A_23_P255376	-0.924908	9.10153	-7.26519	1.98171e-06	0.000709509	0.0814345
ENSG00000183888	C1orf64	CA064_HUMAN	Q8NEQ6	A_32_P232455	0.577984	8.80443	7.26405	1.98558e-06	0.000709509	0.0815935
ENSG00000103449	SALL1	SALL1_HUMAN	Q9NSC2	A_23_P328074	0.757157	10.0557	7.24541	2.04983e-06	0.000726153	0.0842337
ENSG00000143333	RGS16	RGS16_HUMAN	O15492	A_23_P320578	-0.928708	11.071	-7.23876	2.07328e-06	0.000728182	0.0851973
ENSG00000043355	ZIC2	ZIC2_HUMAN	O95409	A_23_P36972	-0.541818	8.89368	-7.22484	2.12325e-06	0.000739389	0.0872508
ENSG00000100985	MMP9	MMP9_HUMAN	P14780	A_23_P40174	-0.747648	9.12529	-7.21777	2.14912e-06	0.000739389	0.0883138
ENSG00000146416	AIG1	AIG1_HUMAN	Q9NVV5	A_23_P93431	-0.830427	10.1235	-7.21505	2.15917e-06	0.000739389	0.0887267
ENSG00000278910	-	-	-	A_24_P504939	-1.01621	8.60963	-7.20541	2.19516e-06	0.0007416	0.0902056
ENSG00000178163	ZNF518B	Z518B_HUMAN	Q9C0D4	A_32_P144421	0.548557	10.2297	7.1995	2.21752e-06	0.0007416	0.0911246
ENSG00000102034	ELF4	ELF4_HUMAN	Q99607	A_24_P340066	0.613276	9.73341	7.19731	2.22587e-06	0.0007416	0.0914675
ENSG00000134363	FST	FST_HUMAN	P19883	A_23_P110531	0.488938	13.8333	7.19415	2.23798e-06	0.0007416	0.0919651
ENSG00000030419	IKZF2	IKZF2_HUMAN	Q9UKS7	A_32_P127978	0.677727	7.96029	7.18952	2.25586e-06	0.0007416	0.0927
ENSG00000030419	ZNFN1A2	IKZF2_HUMAN	Q9UKS7	A_32_P127978	0.677727	7.96029	7.18952	2.25586e-06	0.0007416	0.0927
ENSG00000153551	CMTM7	CKLF7_HUMAN	Q96FZ5	A_23_P256413	-0.951167	11.7693	-7.18235	2.28379e-06	0.000742137	0.093848
ENSG00000267060	PTGES3L	PTG3L_HUMAN	E9PB15	A_23_P207414	0.490319	9.26915	7.17986	2.29361e-06	0.000742137	0.0942514
ENSG00000108825	AARSD1	AASD1_HUMAN	Q9BTE6	A_23_P207414	0.490319	9.26915	7.17986	2.29361e-06	0.000742137	0.0942514
ENSG00000108825	PTGES3L-AARSD1	AASD1_HUMAN	Q9BTE6	A_23_P207414	0.490319	9.26915	7.17986	2.29361e-06	0.000742137	0.0942514
ENSG00000007264	MATK	MATK_HUMAN	P42679	A_23_P50678	-0.589292	8.11574	-7.16505	2.35277e-06	0.000755332	0.0966825
ENSG00000269741	KLK9	KLK9_HUMAN	Q9UKQ9	A_23_P369343	-0.76693	8.46546	-7.15504	2.39363e-06	0.000762491	0.0983613
ENSG00000129455	KLK8	KLK8_HUMAN	O60259	A_23_P369343	-0.76693	8.46546	-7.15504	2.39363e-06	0.000762491	0.0983613
ENSG00000175155	YPEL2	YPEL2_HUMAN	Q96QA6	A_24_P787947	0.522277	9.67605	7.14273	2.44494e-06	0.000772844	0.10047
ENSG00000030419	IKZF2	IKZF2_HUMAN	Q9UKS7	A_32_P114284	0.961295	8.99408	7.12373	2.52643e-06	0.000792507	0.103818
ENSG00000030419	ZNFN1A2	IKZF2_HUMAN	Q9UKS7	A_32_P114284	0.961295	8.99408	7.12373	2.52643e-06	0.000792507	0.103818
ENSG00000135447	PPP1R1A	PPR1A_HUMAN	Q13522	A_23_P53417	-0.566856	10.4182	-7.11898	2.54723e-06	0.000792979	0.104673
ENSG00000033867	SLC4A7	S4A7_HUMAN	Q9Y6M7	A_24_P362931	-0.647534	9.37969	-7.11148	2.58042e-06	0.000797271	0.106037
ENSG00000266028	SRGAP2	-	-	A_23_P200829	0.602463	12.9903	7.0993	2.63532e-06	0.000806962	0.108293
ENSG00000144642	RBMS3	RBMS3_HUMAN	Q6XE24	A_32_P228618	-0.722208	8.45742	-7.09285	2.6649e-06	0.000806962	0.109509
ENSG00000196511	TPK1	TPK1_HUMAN	Q9H3S4	A_23_P145957	0.721058	10.7608	7.08849	2.6851e-06	0.000806962	0.110339
ENSG00000165704	HPRT1	HPRT_HUMAN	P00492	A_23_P11372	-0.530664	10.1759	-7.07389	2.75384e-06	0.000816302	0.113164
ENSG00000169174	PCSK9	PCSK9_HUMAN	Q8NBP7	A_32_P142440	0.585459	11.8849	7.0678	2.78307e-06	0.000816302	0.114365
ENSG00000120885	CLU	CLUS_HUMAN	P10909	A_23_P215913	-1.10056	11.4592	-7.0657	2.79323e-06	0.000816302	0.114782
ENSG00000198483	ANKRD35	ANR35_HUMAN	Q8N283	A_23_P325690	-0.646167	9.74903	-7.06031	2.81945e-06	0.000816302	0.11586
ENSG00000114315	HES1	HES1_HUMAN	Q14469	A_24_P938293	-1.45498	10.2358	-7.06004	2.82079e-06	0.000816302	0.115915
ENSG00000126803	HSPA2	HSP72_HUMAN	P54652	A_23_P88303	-1.21233	10.3178	-7.04636	2.88855e-06	0.000823905	0.118699
ENSG00000268009	SSX4	SSX4_HUMAN	O60224	A_23_P33875	0.80496	11.2959	7.04326	2.90416e-06	0.000823905	0.119341
ENSG00000268009	SSX4B	SSX4_HUMAN	O60224	A_23_P33875	0.80496	11.2959	7.04326	2.90416e-06	0.000823905	0.119341
ENSG00000269791	SSX4	SSX4_HUMAN	O60224	A_23_P33875	0.80496	11.2959	7.04326	2.90416e-06	0.000823905	0.119341
ENSG00000269791	SSX4B	SSX4_HUMAN	O60224	A_23_P33875	0.80496	11.2959	7.04326	2.90416e-06	0.000823905	0.119341
ENSG00000168685	IL7R	IL7RA_HUMAN	P16871	A_23_P404494	0.663577	7.66609	7.04265	2.90722e-06	0.000823905	0.119466
ENSG00000153904	DDAH1	DDAH1_HUMAN	O94760	A_23_P201386	-0.989822	11.825	-7.03856	2.92798e-06	0.000824105	0.120319
ENSG00000170412	GPRC5C	GPC5C_HUMAN	Q9NQ84	A_23_P346670	0.520289	8.55126	7.01697	3.04e-06	0.000844027	0.124923
ENSG00000099139	PCSK5	PCSK5_HUMAN	Q92824	A_23_P257003	-1.11357	10.3426	-7.0007	3.12734e-06	0.000844027	0.128512
ENSG00000075340	ADD2	ADDB_HUMAN	P35612	A_32_P86533	-0.905163	9.12898	-7.00035	3.1293e-06	0.000844027	0.128592
ENSG00000106278	PTPRZ1	PTPRZ_HUMAN	P23471	A_24_P235248	-0.760542	9.42132	-6.99825	3.14077e-06	0.000844027	0.129064
ENSG00000177469	PTRF	PTRF_HUMAN	Q6NZI2	A_23_P394064	-1.31012	12.063	-6.99705	3.14735e-06	0.000844027	0.129334
ENSG00000263639	MSMB	MSMB_HUMAN	P08118	A_24_P146683	0.655071	9.41838	6.99632	3.15136e-06	0.000844027	0.129499
ENSG00000185652	NTF3	NTF3_HUMAN	P20783	A_23_P360797	0.487341	8.42658	6.99419	3.16307e-06	0.000844027	0.12998
ENSG00000162490	DRAXIN	DRAXI_HUMAN	Q8NBI3	A_24_P68008	-0.844961	10.9872	-6.97874	3.24949e-06	0.00084926	0.133531
ENSG00000229590	-	-	-	A_32_P169179	0.901665	10.451	6.9787	3.24969e-06	0.00084926	0.133539
ENSG00000170537	TMC7	TMC7_HUMAN	Q7Z402	A_23_P140928	0.514672	8.69674	6.974	3.27651e-06	0.00084926	0.134642
ENSG00000127831	VIL1	VILI_HUMAN	P09327	A_23_P209527	0.688098	11.4807	6.97219	3.28685e-06	0.00084926	0.135066
ENSG00000050344	NFE2L3	NF2L3_HUMAN	Q9Y4A8	A_23_P42718	-0.979926	11.9286	-6.97081	3.29478e-06	0.00084926	0.135392
ENSG00000221290	-	-	-	A_24_P418408	0.663221	12.5536	6.96875	3.30668e-06	0.00084926	0.135882
ENSG00000182118	FAM89A	FA89A_HUMAN	Q96GI7	A_24_P418408	0.663221	12.5536	6.96875	3.30668e-06	0.00084926	0.135882
ENSG00000130517	PGPEP1	PGPI_HUMAN	Q9NXJ5	A_23_P327370	-0.585452	9.27679	-6.9607	3.35352e-06	0.000855938	0.137806
ENSG00000168234	TTC39C	TT39C_HUMAN	Q8N584	A_23_P401098	-0.554099	8.69076	-6.95643	3.37864e-06	0.000857027	0.138838
ENSG00000111752	PHC1	PHC1_HUMAN	P78364	A_23_P204246	-0.876292	8.66989	-6.95047	3.41409e-06	0.000857575	0.140295
ENSG00000165757	KIAA1462	JCAD_HUMAN	Q9P266	A_23_P301521	0.601273	10.9909	6.94689	3.4355e-06	0.000857575	0.141175
ENSG00000158560	DYNC1I1	DC1I1_HUMAN	O14576	A_23_P93737	0.534888	9.37068	6.94558	3.4434e-06	0.000857575	0.1415
ENSG00000145284	SCD5	SCD5_HUMAN	Q86SK9	A_23_P213288	0.719387	9.45579	6.93405	3.51365e-06	0.000859708	0.144386
ENSG00000105605	CACNG7	CCG7_HUMAN	P62955	A_24_P365349	-0.638294	9.33597	-6.93065	3.53464e-06	0.000859708	0.145249
ENSG00000146386	ABRACL	ABRAL_HUMAN	Q9P1F3	A_32_P160972	-0.837313	13.0371	-6.93016	3.53765e-06	0.000859708	0.145373
ENSG00000162783	IER5	IER5_HUMAN	Q5VY09	A_23_P86330	0.547318	12.7049	6.92786	3.55192e-06	0.000859708	0.145959
ENSG00000184731	FAM110C	F110C_HUMAN	Q1W6H9	A_32_P47643	-0.621048	8.22657	-6.92238	3.58626e-06	0.000861813	0.14737
ENSG00000162139	NEU3	NEUR3_HUMAN	Q9UQ49	A_32_P125820	-0.582477	9.9166	-6.90885	3.6724e-06	0.000877383	0.15091
ENSG00000121281	ADCY7	ADCY7_HUMAN	P51828	A_24_P416177	0.571289	8.48064	6.89703	3.74942e-06	0.000883965	0.154075
ENSG00000075651	PLD1	PLD1_HUMAN	Q13393	A_23_P155335	0.736148	8.94729	6.89301	3.77598e-06	0.000883965	0.155166
ENSG00000075651	pp13439	PLD1_HUMAN	Q13393	A_23_P155335	0.736148	8.94729	6.89301	3.77598e-06	0.000883965	0.155166
ENSG00000152061	RABGAP1L	RBG10_HUMAN	B7ZAP0	A_24_P28295	-0.727157	9.18955	-6.89234	3.78046e-06	0.000883965	0.15535
ENSG00000152061	RABGAP1L	RBG1L_HUMAN	Q5R372	A_24_P28295	-0.727157	9.18955	-6.89234	3.78046e-06	0.000883965	0.15535
ENSG00000113356	POLR3G	RPC7_HUMAN	O15318	A_23_P41942	-0.752444	9.37924	-6.88954	3.79907e-06	0.000883965	0.156115
ENSG00000156475	PPP2R2B	2ABB_HUMAN	Q00005	A_23_P213620	-1.00239	9.95792	-6.88828	3.80751e-06	0.000883965	0.156462
ENSG00000162878	PKDCC	PKDCC_HUMAN	Q504Y2	A_32_P112493	0.656571	10.8202	6.88063	3.8591e-06	0.00089091	0.158582
ENSG00000165617	DACT1	DACT1_HUMAN	Q9NYF0	A_23_P65518	-1.67496	10.1197	-6.86323	3.97913e-06	0.000913489	0.163514
ENSG00000071575	TRIB2	TRIB2_HUMAN	Q92519	A_24_P396753	-0.531688	7.62551	-6.85587	4.03106e-06	0.000915185	0.165649
ENSG00000198113	TOR4A	TOR4A_HUMAN	Q9NXH8	A_23_P147109	-0.494246	8.42016	-6.84862	4.08287e-06	0.000921855	0.167778
ENSG00000237289	CKMT1A	KCRU_HUMAN	P12532	A_23_P163227	-0.951494	10.7421	-6.84187	4.13181e-06	0.000924136	0.169788
ENSG00000237289	CKMT1B	KCRU_HUMAN	P12532	A_23_P163227	-0.951494	10.7421	-6.84187	4.13181e-06	0.000924136	0.169788
ENSG00000223572	CKMT1A	KCRU_HUMAN	P12532	A_23_P163227	-0.951494	10.7421	-6.84187	4.13181e-06	0.000924136	0.169788
ENSG00000223572	CKMT1B	KCRU_HUMAN	P12532	A_23_P163227	-0.951494	10.7421	-6.84187	4.13181e-06	0.000924136	0.169788
ENSG00000130208	APOC1	APOC1_HUMAN	P02654	A_23_P4649	0.673571	13.5754	6.84103	4.13796e-06	0.000924136	0.170041
ENSG00000185808	PIGP	PIGP_HUMAN	P57054	A_23_P143484	0.495382	10.5712	6.83669	4.16971e-06	0.000926195	0.171346
ENSG00000166482	MFAP4	MFAP4_HUMAN	P55083	A_23_P164057	-1.06088	12.7988	-6.82105	4.28655e-06	0.000941964	0.176147
ENSG00000196628	TCF4	ITF2_HUMAN	P15884	A_23_P27332	-0.613792	11.6854	-6.81033	4.36857e-06	0.000950516	0.179518
ENSG00000154096	THY1	THY1_HUMAN	P04216	A_23_P36364	-0.71236	13.1356	-6.8047	4.41225e-06	0.000950516	0.181313
ENSG00000167779	IGFBP6	IBP6_HUMAN	P24592	A_23_P139912	0.790363	10.7135	6.80432	4.41526e-06	0.000950516	0.181436
ENSG00000120833	SOCS2	SOCS2_HUMAN	O14508	A_23_P128215	0.609018	11.6024	6.80397	4.41799e-06	0.000950516	0.181549
ENSG00000086475	SEPHS1	SPS1_HUMAN	P49903	A_24_P90022	-0.700437	13.3634	-6.79296	4.50495e-06	0.000963541	0.185122
ENSG00000169083	AR	ANDR_HUMAN	P10275	A_23_P113111	-0.667919	8.25514	-6.7904	4.52543e-06	0.000963541	0.185963
ENSG00000185664	PMEL	PMEL_HUMAN	P40967	A_23_P312851	-0.866757	9.98157	-6.78622	4.55908e-06	0.000965702	0.187346
ENSG00000154310	TNIK	-	-	A_23_P135568	-1.05956	9.5304	-6.78091	4.60218e-06	0.000968307	0.189117
ENSG00000086475	SEPHS1	SPS1_HUMAN	P49903	A_23_P150092	-0.697095	14.1718	-6.77891	4.6185e-06	0.000968307	0.189788
ENSG00000249101	-	-	-	A_23_P150092	-0.697095	14.1718	-6.77891	4.6185e-06	0.000968307	0.189788
ENSG00000230146	-	-	-	A_23_P150092	-0.697095	14.1718	-6.77891	4.6185e-06	0.000968307	0.189788
ENSG00000188290	HES4	HES4_HUMAN	Q9HCC6	A_23_P149448	0.758959	12.1589	6.77182	4.67695e-06	0.000975583	0.19219
ENSG00000215859	-	-	-	A_23_P52121	0.648324	11.0149	6.76437	4.73918e-06	0.000983571	0.194747
ENSG00000244211	-	-	-	A_23_P52121	0.648324	11.0149	6.76437	4.73918e-06	0.000983571	0.194747
ENSG00000174827	PDZK1	NHRF3_HUMAN	Q5T2W1	A_23_P52121	0.648324	11.0149	6.76437	4.73918e-06	0.000983571	0.194747
ENSG00000156049	GNA14	GNA14_HUMAN	O95837	A_23_P169479	-1.08266	9.26941	-6.75785	4.79439e-06	0.000985079	0.197016
ENSG00000163492	CCDC141	CC141_HUMAN	Q6ZP82	A_23_P427696	0.452527	8.52528	6.74569	4.89908e-06	0.00100158	0.201318
ENSG00000124496	BCAR2	TREF1_HUMAN	Q96PN7	A_23_P59022	-0.588665	9.09745	-6.73926	4.95541e-06	0.00100808	0.203633
ENSG00000124496	TRERF1	TREF1_HUMAN	Q96PN7	A_23_P59022	-0.588665	9.09745	-6.73926	4.95541e-06	0.00100808	0.203633
ENSG00000100714	MTHFD1	C1TC_HUMAN	P11586	A_23_P117494	-0.583804	13.1057	-6.73048	5.03343e-06	0.00101862	0.206839
ENSG00000231831	-	-	-	A_23_P117494	-0.583804	13.1057	-6.73048	5.03343e-06	0.00101862	0.206839
ENSG00000147601	TERF1	TERF1_HUMAN	P54274	A_24_P192434	-0.623735	11.9992	-6.72716	5.06326e-06	0.00101862	0.208065
ENSG00000167614	TTYH1	TTYH1_HUMAN	Q9H313	A_23_P50815	-0.604843	10.5248	-6.72417	5.09026e-06	0.00101862	0.209174
ENSG00000147883	CDKN2B	CDN2B_HUMAN	P42772	A_24_P360674	0.443789	7.97862	6.72106	5.1185e-06	0.00101862	0.210335
ENSG00000128274	A4GALT	A4GAT_HUMAN	Q9NPC4	A_23_P57570	0.635833	8.85009	6.71785	5.14792e-06	0.00101862	0.211543
ENSG00000081913	PHLPP1	PHLP1_HUMAN	O60346	A_23_P89762	-0.684578	8.91345	-6.71697	5.15592e-06	0.00101862	0.211872
ENSG00000160182	TFF1	TFF1_HUMAN	P04155	A_23_P68759	0.816771	8.02461	6.69959	5.31819e-06	0.00104565	0.21854
ENSG00000086991	NOX4	NOX4_HUMAN	Q9NPH5	A_23_P47148	-0.877792	8.98465	-6.69176	5.39306e-06	0.00105532	0.221617
ENSG00000158825	CDA	CDD_HUMAN	P32320	A_23_P34597	-0.742411	10.5191	-6.68496	5.45885e-06	0.00106313	0.22432
ENSG00000074964	ARHGEF10L	ARGAL_HUMAN	Q9HCE6	A_23_P386	-0.604408	9.94176	-6.68143	5.49346e-06	0.00106482	0.225743
ENSG00000107099	DOCK8	DOCK8_HUMAN	Q8NF50	A_32_P181077	0.507676	8.88959	6.676	5.54692e-06	0.00107014	0.22794
ENSG00000113578	FGF1	FGF1_HUMAN	P05230	A_23_P213336	-0.59454	7.67968	-6.67338	5.57297e-06	0.00107014	0.22901
ENSG00000143344	RGL1	RGL1_HUMAN	Q9NZL6	A_23_P115417	-0.823605	8.55718	-6.67048	5.60196e-06	0.0010707	0.230201
ENSG00000077274	CAPN6	CAN6_HUMAN	Q9Y6Q1	A_23_P217570	-0.830989	9.0182	-6.66532	5.65388e-06	0.00107562	0.232335
ENSG00000145423	SFRP2	SFRP2_HUMAN	Q96HF1	A_23_P81103	-1.02474	9.63864	-6.66101	5.69763e-06	0.00107895	0.234133
ENSG00000134595	SOX3	SOX3_HUMAN	P41225	A_23_P85218	-1.29793	10.0274	-6.65417	5.76787e-06	0.00108724	0.237019
ENSG00000113578	FGF1	FGF1_HUMAN	P05230	A_24_P111106	-0.74691	8.01332	-6.64231	5.89162e-06	0.00109997	0.242104
ENSG00000235688	-	-	-	A_32_P49764	-0.855343	10.4933	-6.64109	5.90452e-06	0.00109997	0.242635
ENSG00000130234	ACE2	ACE2_HUMAN	Q9BYF1	A_23_P252981	0.751309	8.74096	6.64004	5.9157e-06	0.00109997	0.243094
ENSG00000136488	CSH1	CSH1_HUMAN	P0DML2	A_23_P207170	-1.04976	9.15182	-6.62313	6.09775e-06	0.00112365	0.250575
ENSG00000162490	DRAXIN	DRAXI_HUMAN	Q8NBI3	A_24_P109417	-0.732248	8.93327	-6.61166	6.2246e-06	0.00113207	0.255787
ENSG00000164764	SBSPON	SBSPO_HUMAN	Q8IVN8	A_23_P170649	0.533148	7.94295	6.61132	6.22849e-06	0.00113207	0.255947
ENSG00000260025	-	-	-	A_32_P206839	-0.515535	10.5447	-6.60907	6.25364e-06	0.00113207	0.256981
ENSG00000122786	CALD1	CALD1_HUMAN	Q05682	A_23_P42575	-1.03291	11.5182	-6.60298	6.32242e-06	0.00113785	0.259807
ENSG00000111816	FRK	FRK_HUMAN	P42685	A_32_P23525	0.596737	7.90671	6.5971	6.38965e-06	0.00113785	0.26257
ENSG00000144366	GULP1	GULP1_HUMAN	Q9UBP9	A_23_P332399	-0.947762	10.9828	-6.59636	6.39811e-06	0.00113785	0.262918
ENSG00000114315	HES1	HES1_HUMAN	Q14469	A_23_P6596	-0.519257	7.42601	-6.59514	6.41217e-06	0.00113785	0.263495
ENSG00000121570	DPPA4	DPPA4_HUMAN	Q7L190	A_23_P380526	-0.617531	12.3192	-6.59173	6.45168e-06	0.00113785	0.265119
ENSG00000099250	NRP1	NRP1_HUMAN	O14786	A_24_P928052	0.496361	8.28376	6.58834	6.4911e-06	0.00113838	0.266739
ENSG00000164176	EDIL3	EDIL3_HUMAN	O43854	A_23_P401606	-0.826611	8.35599	-6.58152	6.57127e-06	0.00113838	0.270033
ENSG00000105974	CAV1	CAV1_HUMAN	Q03135	A_24_P12626	-1.30906	10.2976	-6.57988	6.59066e-06	0.00113838	0.27083
ENSG00000105976	MET	MET_HUMAN	P08581	A_23_P359245	-0.669023	8.84888	-6.57862	6.60564e-06	0.00113838	0.271446
ENSG00000033867	SLC4A7	S4A7_HUMAN	Q9Y6M7	A_23_P132468	-0.687846	9.9119	-6.57664	6.62921e-06	0.00113838	0.272414
ENSG00000169439	SDC2	SDC2_HUMAN	P34741	A_24_P380734	-0.941399	10.6378	-6.57621	6.63441e-06	0.00113838	0.272628
ENSG00000176845	METRNL	METRL_HUMAN	Q641Q3	A_23_P10591	-0.690615	11.331	-6.57502	6.64861e-06	0.00113838	0.273211
ENSG00000151376	ME3	MAON_HUMAN	Q16798	A_23_P116614	0.506695	8.50115	6.56226	6.80323e-06	0.00116002	0.279565
ENSG00000197024	ZNF398	ZN398_HUMAN	Q8TD17	A_32_P151875	-0.701289	11.1806	-6.55725	6.86503e-06	0.00116433	0.282105
ENSG00000163629	PTPN13	PTN13_HUMAN	Q12923	A_23_P18493	0.517339	11.9857	6.55519	6.89051e-06	0.00116433	0.283152
ENSG00000175505	CLCF1	CLCF1_HUMAN	Q9UBD9	A_23_P138760	0.42649	8.06964	6.55334	6.91352e-06	0.00116433	0.284097
ENSG00000273173	SNURF	SNURF_HUMAN	Q9Y675	A_24_P347624	-0.492537	13.2073	-6.54472	7.02197e-06	0.00117382	0.288554
ENSG00000214265	SNURF	SNURF_HUMAN	Q9Y675	A_24_P347624	-0.492537	13.2073	-6.54472	7.02197e-06	0.00117382	0.288554
ENSG00000128739	SNRPN	RSMN_HUMAN	P63162	A_24_P347624	-0.492537	13.2073	-6.54472	7.02197e-06	0.00117382	0.288554
ENSG00000183569	SERHL2	SEHL2_HUMAN	Q9H4I8	A_23_P120953	0.613069	10.4507	6.54432	7.02699e-06	0.00117382	0.28876
ENSG00000075213	SEMA3A	SEM3A_HUMAN	Q14563	A_23_P317591	-0.509392	10.6785	-6.542	7.05649e-06	0.00117398	0.289972
ENSG00000232445	-	-	-	A_24_P928765	-0.740055	9.25064	-6.53164	7.18979e-06	0.00118655	0.29545
ENSG00000136110	LECT1	LECT1_HUMAN	O75829	A_23_P25587	-0.710814	9.02834	-6.52281	7.30538e-06	0.0012008	0.3002
ENSG00000136488	CSH1	CSH1_HUMAN	P0DML2	A_24_P211044	-1.05926	9.2182	-6.488	7.78062e-06	0.00127382	0.319729
ENSG00000213218	CSH1	CSH2_HUMAN	P0DML3	A_24_P211044	-1.05926	9.2182	-6.488	7.78062e-06	0.00127382	0.319729
ENSG00000213218	CSH2	CSH2_HUMAN	P0DML3	A_24_P211044	-1.05926	9.2182	-6.488	7.78062e-06	0.00127382	0.319729
ENSG00000033327	GAB2	GAB2_HUMAN	Q9UQC2	A_23_P203743	0.474184	11.1696	6.48401	7.83718e-06	0.00127799	0.322053
ENSG00000125462	C1orf61	CROC4_HUMAN	Q13536	A_32_P138032	0.543481	9.05232	6.47971	7.89856e-06	0.00128046	0.324576
ENSG00000165617	DACT1	DACT1_HUMAN	Q9NYF0	A_24_P284093	-0.61856	7.45657	-6.47247	8.00302e-06	0.00128503	0.328868
ENSG00000168502	MTCL1	MTCL1_HUMAN	Q9Y4B5	A_23_P360605	-0.806107	8.98173	-6.47043	8.0327e-06	0.00128503	0.330088
ENSG00000166387	PPFIBP2	LIPB2_HUMAN	Q8ND30	A_23_P409623	0.774078	10.964	6.47015	8.03672e-06	0.00128503	0.330253
ENSG00000124212	PTGIS	PTGIS_HUMAN	Q16647	A_24_P48723	-0.627949	8.4782	-6.46306	8.1409e-06	0.00128825	0.334534
ENSG00000162493	PDPN	PDPN_HUMAN	Q86YL7	A_24_P299685	-0.653644	10.9568	-6.46245	8.14996e-06	0.00128825	0.334906
ENSG00000171643	S100Z	S100Z_HUMAN	Q8WXG8	A_24_P12136	0.598082	10.3663	6.45964	8.19154e-06	0.00128825	0.336615
ENSG00000177291	GJD4	CXD4_HUMAN	Q96KN9	A_23_P393144	0.424619	7.83604	6.4582	8.21303e-06	0.00128825	0.337498
ENSG00000197238	HIST1H4A	H4_HUMAN	P62805	A_23_P30805	-0.662404	12.9769	-6.45762	8.22178e-06	0.00128825	0.337857
ENSG00000197238	HIST1H4B	H4_HUMAN	P62805	A_23_P30805	-0.662404	12.9769	-6.45762	8.22178e-06	0.00128825	0.337857
ENSG00000197238	HIST1H4C	H4_HUMAN	P62805	A_23_P30805	-0.662404	12.9769	-6.45762	8.22178e-06	0.00128825	0.337857
ENSG00000197238	HIST1H4D	H4_HUMAN	P62805	A_23_P30805	-0.662404	12.9769	-6.45762	8.22178e-06	0.00128825	0.337857
ENSG00000197238	HIST1H4E	H4_HUMAN	P62805	A_23_P30805	-0.662404	12.9769	-6.45762	8.22178e-06	0.00128825	0.337857
ENSG00000197238	HIST1H4F	H4_HUMAN	P62805	A_23_P30805	-0.662404	12.9769	-6.45762	8.22178e-06	0.00128825	0.337857
ENSG00000197238	HIST1H4H	H4_HUMAN	P62805	A_23_P30805	-0.662404	12.9769	-6.45762	8.22178e-06	0.00128825	0.337857
ENSG00000197238	HIST1H4I	H4_HUMAN	P62805	A_23_P30805	-0.662404	12.9769	-6.45762	8.22178e-06	0.00128825	0.337857
ENSG00000197238	HIST1H4J	H4_HUMAN	P62805	A_23_P30805	-0.662404	12.9769	-6.45762	8.22178e-06	0.00128825	0.337857
ENSG00000197238	HIST1H4K	H4_HUMAN	P62805	A_23_P30805	-0.662404	12.9769	-6.45762	8.22178e-06	0.00128825	0.337857
ENSG00000197238	HIST1H4L	H4_HUMAN	P62805	A_23_P30805	-0.662404	12.9769	-6.45762	8.22178e-06	0.00128825	0.337857
ENSG00000197238	HIST2H4A	H4_HUMAN	P62805	A_23_P30805	-0.662404	12.9769	-6.45762	8.22178e-06	0.00128825	0.337857
ENSG00000197238	HIST2H4B	H4_HUMAN	P62805	A_23_P30805	-0.662404	12.9769	-6.45762	8.22178e-06	0.00128825	0.337857
ENSG00000197238	HIST4H4	H4_HUMAN	P62805	A_23_P30805	-0.662404	12.9769	-6.45762	8.22178e-06	0.00128825	0.337857
ENSG00000273542	HIST1H4A	H4_HUMAN	P62805	A_23_P30805	-0.662404	12.9769	-6.45762	8.22178e-06	0.00128825	0.337857
ENSG00000273542	HIST1H4B	H4_HUMAN	P62805	A_23_P30805	-0.662404	12.9769	-6.45762	8.22178e-06	0.00128825	0.337857
ENSG00000273542	HIST1H4C	H4_HUMAN	P62805	A_23_P30805	-0.662404	12.9769	-6.45762	8.22178e-06	0.00128825	0.337857
ENSG00000273542	HIST1H4D	H4_HUMAN	P62805	A_23_P30805	-0.662404	12.9769	-6.45762	8.22178e-06	0.00128825	0.337857
ENSG00000273542	HIST1H4E	H4_HUMAN	P62805	A_23_P30805	-0.662404	12.9769	-6.45762	8.22178e-06	0.00128825	0.337857
ENSG00000273542	HIST1H4F	H4_HUMAN	P62805	A_23_P30805	-0.662404	12.9769	-6.45762	8.22178e-06	0.00128825	0.337857
ENSG00000273542	HIST1H4H	H4_HUMAN	P62805	A_23_P30805	-0.662404	12.9769	-6.45762	8.22178e-06	0.00128825	0.337857
ENSG00000273542	HIST1H4I	H4_HUMAN	P62805	A_23_P30805	-0.662404	12.9769	-6.45762	8.22178e-06	0.00128825	0.337857
ENSG00000273542	HIST1H4J	H4_HUMAN	P62805	A_23_P30805	-0.662404	12.9769	-6.45762	8.22178e-06	0.00128825	0.337857
ENSG00000273542	HIST1H4K	H4_HUMAN	P62805	A_23_P30805	-0.662404	12.9769	-6.45762	8.22178e-06	0.00128825	0.337857
ENSG00000273542	HIST1H4L	H4_HUMAN	P62805	A_23_P30805	-0.662404	12.9769	-6.45762	8.22178e-06	0.00128825	0.337857
ENSG00000273542	HIST2H4A	H4_HUMAN	P62805	A_23_P30805	-0.662404	12.9769	-6.45762	8.22178e-06	0.00128825	0.337857
ENSG00000273542	HIST2H4B	H4_HUMAN	P62805	A_23_P30805	-0.662404	12.9769	-6.45762	8.22178e-06	0.00128825	0.337857
ENSG00000273542	HIST4H4	H4_HUMAN	P62805	A_23_P30805	-0.662404	12.9769	-6.45762	8.22178e-06	0.00128825	0.337857
ENSG00000143369	ECM1	ECM1_HUMAN	Q16610	A_23_P160559	0.630644	8.79642	6.45607	8.24497e-06	0.00128825	0.338811
ENSG00000050344	NFE2L3	NF2L3_HUMAN	Q9Y4A8	A_24_P136653	-0.518829	8.31584	-6.45294	8.29202e-06	0.0012907	0.340744
ENSG00000143367	TUFT1	TUFT1_HUMAN	Q9NNX1	A_23_P371824	0.476437	11.968	6.44748	8.37474e-06	0.00129865	0.344143
ENSG00000104112	SCG3	SCG3_HUMAN	Q8WXD2	A_24_P210569	-0.596302	8.28623	-6.44381	8.43074e-06	0.00129865	0.346445
ENSG00000053747	LAMA3	LAMA3_HUMAN	Q16787	A_23_P89780	-0.734757	8.45596	-6.44334	8.4379e-06	0.00129865	0.346739
ENSG00000119900	OGFRL1	OGRL1_HUMAN	Q5TC84	A_23_P7791	-1.36046	11.0468	-6.44053	8.48112e-06	0.00129942	0.348515
ENSG00000005513	SOX8	SOX8_HUMAN	P57073	A_23_P66137	-0.738196	9.89502	-6.43805	8.51963e-06	0.00129942	0.350097
ENSG00000111087	GLI1	GLI1_HUMAN	P08151	A_23_P105251	-0.590432	9.18277	-6.43687	8.53781e-06	0.00129942	0.350844
ENSG00000156500	FAM122C	F222C_HUMAN	Q6P4D5	A_23_P340188	0.423887	8.6482	6.42584	8.71112e-06	0.00132091	0.357966
ENSG00000156500	RP3-473B4.1	F222C_HUMAN	Q6P4D5	A_23_P340188	0.423887	8.6482	6.42584	8.71112e-06	0.00132091	0.357966
ENSG00000145247	OCIAD2	OCAD2_HUMAN	Q56VL3	A_23_P121702	-0.656931	13.7467	-6.41927	8.81603e-06	0.0013319	0.362277
ENSG00000185338	SOCS1	SOCS1_HUMAN	O15524	A_23_P420196	-0.883182	9.69118	-6.41573	8.87294e-06	0.00133559	0.364616
ENSG00000231925	TAPBP	TPSN_HUMAN	O15533	A_23_P365719	-0.593262	8.8773	-6.41182	8.93655e-06	0.00133869	0.36723
ENSG00000101680	LAMA1	LAMA1_HUMAN	P25391	A_32_P313405	0.858344	12.357	6.40997	8.96672e-06	0.00133869	0.368469
ENSG00000162545	CAMK2N1	CK2N1_HUMAN	Q7Z7J9	A_24_P117620	0.552383	9.63782	6.40828	8.99434e-06	0.00133869	0.369604
ENSG00000143494	VASH2	VASH2_HUMAN	Q86V25	A_23_P115492	-1.0037	11.3297	-6.40468	9.05367e-06	0.00133869	0.372042
ENSG00000143333	RGS16	RGS16_HUMAN	O15492	A_23_P217845	-0.640292	8.97498	-6.40451	9.0564e-06	0.00133869	0.372154
ENSG00000104361	NIPAL2	NPAL2_HUMAN	Q9H841	A_24_P798709	0.577131	8.30825	6.39905	9.14707e-06	0.00134724	0.37588
ENSG00000110092	CCND1	CCND1_HUMAN	P24385	A_24_P193011	-0.591671	8.58185	-6.39224	9.26154e-06	0.00135248	0.380584
ENSG00000255532	-	-	-	A_24_P739344	-0.68788	8.22346	-6.39064	9.28854e-06	0.00135248	0.381694
ENSG00000164483	SAMD3	SAMD3_HUMAN	Q8N6K7	A_23_P397937	0.665679	9.96381	6.39035	9.29361e-06	0.00135248	0.381902
ENSG00000141682	PMAIP1	APR_HUMAN	Q13794	A_23_P207999	-0.945035	11.6491	-6.38901	9.31639e-06	0.00135248	0.382838
ENSG00000164430	MB21D1	CGAS_HUMAN	Q8N884	A_32_P1173	-0.604256	8.0742	-6.3872	9.34718e-06	0.00135248	0.384104
ENSG00000163959	SLC51A	OSTA_HUMAN	Q86UW1	A_23_P40761	-0.562436	7.54831	-6.37947	9.48014e-06	0.0013669	0.389567
ENSG00000173473	SMARCC1	SMRC1_HUMAN	Q92922	A_23_P83453	-0.406689	11.9775	-6.3739	9.5771e-06	0.00137175	0.393552
ENSG00000183722	LHFP	LHFP_HUMAN	Q9Y693	A_23_P88069	-0.487017	8.74582	-6.37371	9.58054e-06	0.00137175	0.393693
ENSG00000254087	LYN	LYN_HUMAN	P07948	A_23_P147431	-0.582036	10.07	-6.35892	9.84326e-06	0.00140432	0.404489
ENSG00000125821	DTD1	DTD1_HUMAN	Q8TEA8	A_23_P17512	-0.473856	12.6351	-6.35709	9.87632e-06	0.00140432	0.405848
ENSG00000106278	PTPRZ1	PTPRZ_HUMAN	P23471	A_23_P168761	-0.927108	10.5199	-6.34043	1.01823e-05	0.00144283	0.41842
ENSG00000075340	ADD2	ADDB_HUMAN	P35612	A_23_P421436	-0.529724	8.05755	-6.32907	1.03967e-05	0.0014632	0.42723
ENSG00000148444	COMMD3	COMD3_HUMAN	Q9UBI1	A_23_P138514	0.558357	11.3776	6.32904	1.03972e-05	0.0014632	0.427254
ENSG00000057252	SOAT1	SOAT1_HUMAN	P35610	A_24_P216654	0.579216	9.05857	6.31379	1.06925e-05	0.00149698	0.439388
ENSG00000159176	CSRP1	CSRP1_HUMAN	P21291	A_23_P74359	-0.648205	8.51086	-6.31289	1.07102e-05	0.00149698	0.440112
ENSG00000069399	BCL3	BCL3_HUMAN	P20749	A_23_P4662	0.468841	10.082	6.30841	1.07987e-05	0.00150086	0.443751
ENSG00000151093	OXSM	OXSM_HUMAN	Q9NWU1	A_23_P132486	0.421395	9.16644	6.3074	1.08187e-05	0.00150086	0.444575
ENSG00000091592	NLRP1	NALP1_HUMAN	Q9C000	A_23_P107351	-0.576617	10.1743	-6.30595	1.08475e-05	0.00150086	0.445756
ENSG00000130208	APOC1	APOC1_HUMAN	P02654	A_24_P109214	0.524298	13.3542	6.30398	1.0887e-05	0.00150127	0.447379
ENSG00000008226	DLEC1	DLEC1_HUMAN	Q9Y238	A_23_P18282	0.553966	8.6228	6.2975	1.10175e-05	0.00151419	0.452741
ENSG00000153363	-	-	-	A_23_P1014	-0.713689	12.2716	-6.28977	1.11751e-05	0.00152812	0.45922
ENSG00000133488	SEC14L4	S14L4_HUMAN	Q9UDX3	A_23_P421032	-0.466714	7.99448	-6.28699	1.12325e-05	0.00152812	0.461575
ENSG00000135047	CTSL	CATL1_HUMAN	P07711	A_23_P94533	0.621557	14.772	6.28587	1.12558e-05	0.00152812	0.462534
ENSG00000102931	ARL2BP	AR2BP_HUMAN	Q9Y2Y0	A_23_P15182	0.436801	10.7396	6.2853	1.12676e-05	0.00152812	0.463019
ENSG00000104313	EYA1	EYA1_HUMAN	Q99502	A_23_P502363	0.499308	7.94984	6.28064	1.13645e-05	0.00153325	0.467
ENSG00000102575	ACP5	PPA5_HUMAN	P13686	A_23_P142075	-0.709435	10.149	-6.2799	1.13801e-05	0.00153325	0.467643
ENSG00000278910	-	-	-	A_32_P155984	-0.773673	8.74464	-6.27565	1.14695e-05	0.00154025	0.471316
ENSG00000075340	ADD2	ADDB_HUMAN	P35612	A_23_P209856	-0.58203	8.14134	-6.27149	1.15577e-05	0.00154217	0.47494
ENSG00000147596	PRDM14	PRD14_HUMAN	Q9GZV8	A_23_P123488	-0.941412	8.05835	-6.27065	1.15757e-05	0.00154217	0.47568
ENSG00000189014	-	-	-	A_32_P166598	-1.07015	10.0825	-6.26968	1.15964e-05	0.00154217	0.476532
ENSG00000165874	-	-	-	A_32_P166598	-1.07015	10.0825	-6.26968	1.15964e-05	0.00154217	0.476532
ENSG00000198113	TOR4A	TOR4A_HUMAN	Q9NXH8	A_23_P147106	-0.705812	10.7598	-6.26444	1.17089e-05	0.00154744	0.481154
ENSG00000105538	RASIP1	RAIN_HUMAN	Q5U651	A_23_P119353	-0.493284	9.87678	-6.26433	1.17113e-05	0.00154744	0.481253
ENSG00000119866	BCL11A	BC11A_HUMAN	Q9H165	A_24_P402588	-0.69113	9.91284	-6.26141	1.17745e-05	0.0015508	0.483851
ENSG00000148834	GSTO1	GSTO1_HUMAN	P78417	A_24_P304051	0.439381	14.0519	6.25468	1.19216e-05	0.00156062	0.489895
ENSG00000171310	CHST11	CHSTB_HUMAN	Q9NPF2	A_32_P99171	0.520123	9.51824	6.25078	1.20077e-05	0.00156062	0.493431
ENSG00000237943	-	-	-	A_32_P232559	0.487045	12.2659	6.24916	1.20436e-05	0.00156062	0.494907
ENSG00000168824	D4S234E	-	-	A_23_P371107	-0.704926	9.0347	-6.24895	1.20483e-05	0.00156062	0.495101
ENSG00000168461	RAB31	RAB31_HUMAN	Q13636	A_23_P141688	-0.720365	11.1105	-6.24766	1.2077e-05	0.00156062	0.496279
ENSG00000214125	-	-	-	A_24_P341731	-0.468886	11.2993	-6.24359	1.2168e-05	0.00156746	0.50002
ENSG00000172318	B3GALT1	B3GT1_HUMAN	Q9Y5Z6	A_23_P108564	-0.539704	7.92473	-6.23247	1.24206e-05	0.001595	0.510399
ENSG00000196628	TCF4	ITF2_HUMAN	P15884	A_24_P931428	-0.535385	9.36044	-6.2226	1.26493e-05	0.00161574	0.519799
ENSG00000173320	STOX2	STOX2_HUMAN	Q9P2F5	A_23_P251364	-0.766878	9.06543	-6.22211	1.26608e-05	0.00161574	0.520268
ENSG00000145990	GFOD1	GFOD1_HUMAN	Q9NXC2	A_23_P122662	-0.689016	9.34044	-6.21811	1.27547e-05	0.00162251	0.524127
ENSG00000174871	CNIH2	CNIH2_HUMAN	Q6PI25	A_24_P203315	-0.476187	7.46921	-6.2165	1.27928e-05	0.00162251	0.525695
ENSG00000250366	-	-	-	A_24_P525749	-0.676066	11.041	-6.21165	1.2908e-05	0.00163209	0.530428
ENSG00000249850	-	-	-	A_24_P384369	0.510764	14.5518	6.20675	1.30258e-05	0.00164193	0.53527
ENSG00000176842	IRX5	IRX5_HUMAN	P78411	A_24_P48057	0.576357	7.93955	6.20147	1.31536e-05	0.00164793	0.540522
ENSG00000137501	SYTL2	SYTL2_HUMAN	Q9HCH5	A_23_P53193	-0.871697	8.37078	-6.19696	1.32641e-05	0.00165672	0.545061
ENSG00000126016	AMOT	AMOT_HUMAN	Q4VCS5	A_24_P344961	0.590298	9.6214	6.1911	1.34089e-05	0.00166973	0.55101
ENSG00000241476	SSX2	SSX2_HUMAN	Q16385	A_24_P256243	0.66182	9.60618	6.18256	1.36228e-05	0.00169125	0.559803
ENSG00000241476	SSX2B	SSX2_HUMAN	Q16385	A_24_P256243	0.66182	9.60618	6.18256	1.36228e-05	0.00169125	0.559803
ENSG00000268447	SSX2	SSX2_HUMAN	Q16385	A_24_P256243	0.66182	9.60618	6.18256	1.36228e-05	0.00169125	0.559803
ENSG00000268447	SSX2B	SSX2_HUMAN	Q16385	A_24_P256243	0.66182	9.60618	6.18256	1.36228e-05	0.00169125	0.559803
ENSG00000174721	FGFBP3	FGFP3_HUMAN	Q8TAT2	A_24_P201381	-0.846707	10.6146	-6.17987	1.36911e-05	0.00169461	0.562609
ENSG00000129691	ASH2L	ASH2L_HUMAN	Q9UBL3	A_23_P134827	0.534214	13.4298	6.17587	1.3793e-05	0.00169703	0.566796
ENSG00000177707	PVRL3	PVRL3_HUMAN	Q9NQS3	A_23_P401547	-0.884625	10.1827	-6.17586	1.37933e-05	0.00169703	0.566809
ENSG00000147601	TERF1	TERF1_HUMAN	P54274	A_32_P220696	-0.541829	11.6009	-6.16623	1.40422e-05	0.00172249	0.577035
ENSG00000104112	SCG3	SCG3_HUMAN	Q8WXD2	A_23_P54267	-0.822328	10.6681	-6.15906	1.42303e-05	0.00173521	0.584764
ENSG00000116670	MAD2L2	MD2L2_HUMAN	Q9UI95	A_23_P23206	-0.493809	12.0664	-6.15353	1.43774e-05	0.00174796	0.590811
ENSG00000166342	NETO1	NETO1_HUMAN	Q8TDF5	A_23_P4489	-0.551621	7.69747	-6.14972	1.44794e-05	0.00175517	0.595003
ENSG00000179178	TMEM125	TM125_HUMAN	Q96AQ2	A_23_P115022	-0.633886	11.4702	-6.14657	1.45646e-05	0.0017603	0.598503
ENSG00000165821	SALL2	SALL2_HUMAN	Q9Y467	A_23_P48585	-0.498417	13.8037	-6.13853	1.4784e-05	0.00177721	0.607518
ENSG00000110002	VWA5A	VMA5A_HUMAN	O00534	A_23_P98455	0.574068	10.3731	6.13828	1.4791e-05	0.00177721	0.607806
ENSG00000111879	FAM184A	F184A_HUMAN	Q8NB25	A_23_P167818	0.446422	13.2214	6.13221	1.4959e-05	0.00179214	0.614712
ENSG00000203668	CHML	RAE2_HUMAN	P26374	A_24_P712350	-0.636961	9.36557	-6.12975	1.50277e-05	0.00179214	0.617534
ENSG00000261548	-	-	-	A_23_P338113	-0.411439	9.49217	-6.12727	1.50972e-05	0.00179214	0.620391
ENSG00000103316	CRYM	CRYM_HUMAN	Q14894	A_23_P77731	-0.639631	11.0084	-6.1263	1.51244e-05	0.00179214	0.621506
ENSG00000185215	TNFAIP2	TNAP2_HUMAN	Q03169	A_23_P421423	-0.76613	9.48549	-6.12598	1.51333e-05	0.00179214	0.621874
ENSG00000228486	-	-	-	A_24_P456723	0.441133	8.60088	6.12435	1.51794e-05	0.00179243	0.623765
ENSG00000189431	RASSF10	RASFA_HUMAN	A6NK89	A_32_P52414	0.554276	8.58824	6.1219	1.52488e-05	0.00179547	0.626618
ENSG00000174807	CD248	CD248_HUMAN	Q9HCU0	A_23_P52697	-0.877364	9.25534	-6.11699	1.5389e-05	0.00180178	0.632381
ENSG00000254281	-	-	-	A_32_P165504	-0.487435	7.24453	-6.11695	1.53901e-05	0.00180178	0.632426
ENSG00000075340	ADD2	ADDB_HUMAN	P35612	A_23_P317636	-0.555817	8.05086	-6.11522	1.54398e-05	0.00180246	0.634467
ENSG00000165323	FAT3	FAT3_HUMAN	Q8TDW7	A_32_P206415	-0.846995	8.98382	-6.11021	1.55847e-05	0.00181423	0.640423
ENSG00000065534	MYLK	MYLK_HUMAN	Q15746	A_23_P143817	-0.493874	9.06921	-6.10423	1.57595e-05	0.00182245	0.647605
ENSG00000139438	FAM222A	F222A_HUMAN	Q5U5X8	A_23_P128375	0.46815	10.9444	6.10235	1.58149e-05	0.00182245	0.649881
ENSG00000120306	CYSTM1	CYTM1_HUMAN	Q9H1C7	A_23_P259506	0.445014	11.9638	6.102	1.58254e-05	0.00182245	0.650312
ENSG00000119865	CNRIP1	CNRP1_HUMAN	Q96F85	A_23_P329353	-0.739176	8.87611	-6.10175	1.58327e-05	0.00182245	0.650614
ENSG00000167670	CHAF1A	CAF1A_HUMAN	Q13111	A_24_P53519	-0.492368	12.6637	-6.10002	1.58838e-05	0.00182322	0.652714
ENSG00000146215	CRIP3	CRIP3_HUMAN	Q6Q6R5	A_23_P156562	-0.585203	8.33965	-6.08512	1.63318e-05	0.00186943	0.671124
ENSG00000180628	PCGF5	PCGF5_HUMAN	Q86SE9	A_24_P941699	0.467623	7.59365	6.0823	1.64182e-05	0.00187409	0.674673
ENSG00000118777	ABCG2	ABCG2_HUMAN	Q9UNQ0	A_23_P18713	-0.756181	8.94991	-6.06753	1.68777e-05	0.00190768	0.693555
ENSG00000162576	MXRA8	MXRA8_HUMAN	Q9BRK3	A_23_P32444	0.485119	12.475	6.0673	1.68851e-05	0.00190768	0.69386
ENSG00000137573	SULF1	SULF1_HUMAN	Q8IWU6	A_23_P43164	-0.502306	7.70506	-6.06591	1.6929e-05	0.00190768	0.695663
ENSG00000065809	FAM107B	F107B_HUMAN	Q9H098	A_23_P149975	-0.509336	11.1581	-6.06542	1.69445e-05	0.00190768	0.696302
ENSG00000174640	SLCO2A1	SO2A1_HUMAN	Q92959	A_23_P135990	0.6128	10.5606	6.06164	1.70648e-05	0.00190974	0.701243
ENSG00000265087	-	-	-	A_23_P251680	-0.558232	7.96675	-6.0613	1.70757e-05	0.00190974	0.701694
ENSG00000093010	COMT	COMT_HUMAN	P21964	A_23_P251680	-0.558232	7.96675	-6.0613	1.70757e-05	0.00190974	0.701694
ENSG00000158234	FAIM	FAIM1_HUMAN	Q9NVQ4	A_23_P253932	0.384383	11.1139	6.05796	1.71826e-05	0.00190974	0.706086
ENSG00000101335	MYL9	MYL9_HUMAN	P24844	A_23_P210425	0.470523	13.6391	6.05777	1.71889e-05	0.00190974	0.706341
ENSG00000177311	ZBTB38	ZBT38_HUMAN	Q8NAP3	A_23_P380076	0.457711	9.51348	6.05757	1.71952e-05	0.00190974	0.706602
ENSG00000144366	GULP1	GULP1_HUMAN	Q9UBP9	A_32_P153388	-0.484018	7.93351	-6.04832	1.74956e-05	0.00193326	0.718947
ENSG00000074964	ARHGEF10L	ARGAL_HUMAN	Q9HCE6	A_23_P382	-0.516154	10.41	-6.04815	1.75011e-05	0.00193326	0.719174
ENSG00000135324	MRAP2	MRAP2_HUMAN	Q96G30	A_23_P357207	0.504902	10.0603	6.04416	1.76326e-05	0.00194257	0.724578
ENSG00000157168	NRG1	NRG1_HUMAN	Q02297	A_23_P360777	0.54379	9.54943	6.04242	1.76902e-05	0.00194369	0.726942
ENSG00000135547	HEY2	HEY2_HUMAN	Q9UBP5	A_23_P168351	-0.500755	7.31061	-6.03376	1.79796e-05	0.00197023	0.738835
ENSG00000118407	FILIP1	FLIP1_HUMAN	Q7Z7B0	A_23_P436369	0.500017	7.98309	6.0312	1.80662e-05	0.00197043	0.742393
ENSG00000134463	ECHDC3	ECHD3_HUMAN	Q96DC8	A_23_P127033	-0.497457	9.89449	-6.02904	1.81394e-05	0.00197043	0.745402
ENSG00000132688	NES	NEST_HUMAN	P48681	A_23_P103672	-0.65898	13.6756	-6.02805	1.81732e-05	0.00197043	0.746792
ENSG00000084070	SMAP2	SMAP2_HUMAN	Q8WU79	A_23_P406330	0.627614	9.12021	6.02568	1.82543e-05	0.00197108	0.750123
ENSG00000138821	SLC39A8	S39A8_HUMAN	Q9C0K1	A_23_P41424	0.504334	12.342	6.02507	1.82752e-05	0.00197108	0.750983
ENSG00000133636	NTS	NEUT_HUMAN	P30990	A_23_P36882	-0.847868	11.9908	-6.02212	1.83766e-05	0.00197683	0.755148
ENSG00000198937	CCDC167	CC167_HUMAN	Q9P0B6	A_23_P133770	0.426094	11.7192	6.01971	1.84599e-05	0.00198061	0.758574
ENSG00000125798	FOXA2	FOXA2_HUMAN	Q9Y261	A_23_P500936	0.55119	12.9959	6.01072	1.87739e-05	0.00200475	0.771475
ENSG00000213023	SYT3	SYT3_HUMAN	Q9BQG1	A_23_P55917	-0.484994	9.39476	-6.01048	1.87825e-05	0.00200475	0.771829
ENSG00000267890	-	-	-	A_23_P55917	-0.484994	9.39476	-6.01048	1.87825e-05	0.00200475	0.771829
ENSG00000115318	LOXL3	LOXL3_HUMAN	P58215	A_24_P88763	-0.551429	10.4067	-6.00314	1.90433e-05	0.00202732	0.782546
ENSG00000173598	NUDT4	NUDT4_HUMAN	Q9NZJ9	A_23_P2366	0.529521	12.6581	5.99813	1.92235e-05	0.00204122	0.789952
ENSG00000271121	-	-	-	A_23_P2366	0.529521	12.6581	5.99813	1.92235e-05	0.00204122	0.789952
ENSG00000177144	-	-	-	A_23_P2366	0.529521	12.6581	5.99813	1.92235e-05	0.00204122	0.789952
ENSG00000204437	-	-	-	A_23_P376449	0.680825	12.0802	5.98991	1.95227e-05	0.00206765	0.802248
ENSG00000236417	-	-	-	A_23_P376449	0.680825	12.0802	5.98991	1.95227e-05	0.00206765	0.802248
ENSG00000230011	-	-	-	A_23_P376449	0.680825	12.0802	5.98991	1.95227e-05	0.00206765	0.802248
ENSG00000113319	RASGRF2	RGRF2_HUMAN	O14827	A_23_P133386	-0.795866	8.90389	-5.97656	2.00195e-05	0.00210824	0.822662
ENSG00000138119	MYOF	MYOF_HUMAN	Q9NZM1	A_23_P354387	0.5796	11.135	5.97357	2.01325e-05	0.00210824	0.827306
ENSG00000224557	-	-	-	A_23_P59167	-0.625996	8.15805	-5.97226	2.01821e-05	0.00210824	0.829344
ENSG00000259996	-	-	-	A_24_P50666	-0.609114	11.0534	-5.97199	2.01927e-05	0.00210824	0.829778
ENSG00000102934	PLLP	PLLP_HUMAN	Q9Y342	A_23_P43763	0.556568	7.93517	5.97143	2.02138e-05	0.00210824	0.830647
ENSG00000156515	HK1	HXK1_HUMAN	P19367	A_23_P217958	-0.604805	11.5589	-5.96738	2.03685e-05	0.00211864	0.837003
ENSG00000259580	-	-	-	A_23_P37676	-0.668994	8.85128	-5.96613	2.04166e-05	0.00211864	0.83898
ENSG00000166073	GPR176	GP176_HUMAN	Q14439	A_23_P37676	-0.668994	8.85128	-5.96613	2.04166e-05	0.00211864	0.83898
ENSG00000104368	PLAT	TPA_HUMAN	P00750	A_23_P82868	-0.618407	7.98736	-5.96013	2.06489e-05	0.00213197	0.848524
ENSG00000262304	TRPV1	TRPV1_HUMAN	Q8NER1	A_23_P500244	0.397354	8.57832	5.95444	2.08717e-05	0.00214957	0.85768
ENSG00000196689	TRPV1	TRPV1_HUMAN	Q8NER1	A_23_P500244	0.397354	8.57832	5.95444	2.08717e-05	0.00214957	0.85768
ENSG00000106538	RARRES2	RARR2_HUMAN	Q99969	A_23_P134237	-0.72603	11.6	-5.95099	2.10079e-05	0.0021582	0.863278
ENSG00000182957	SPATA13	SPT13_HUMAN	Q96N96	A_23_P390116	-0.854367	9.56293	-5.94802	2.11258e-05	0.00216489	0.868122
ENSG00000145423	SFRP2	SFRP2_HUMAN	Q96HF1	A_24_P137501	-0.869485	9.86985	-5.94331	2.13143e-05	0.00217878	0.87587
ENSG00000148677	ANKRD1	ANKR1_HUMAN	Q15327	A_23_P161218	0.86113	9.93462	5.93938	2.1473e-05	0.00217964	0.882388
ENSG00000135870	RC3H1	RC3H1_HUMAN	Q5TC82	A_32_P96807	0.470904	11.3015	5.93923	2.14791e-05	0.00217964	0.88264
ENSG00000179242	CDH4	CADH4_HUMAN	P55283	A_23_P17593	-0.431188	7.72087	-5.9282	2.19312e-05	0.00221975	0.90122
ENSG00000141736	ERBB2	ERBB2_HUMAN	P04626	A_23_P89249	-0.473864	12.4306	-5.91851	2.23367e-05	0.00225524	0.917882
ENSG00000163568	AIM2	AIM2_HUMAN	O14862	A_32_P44394	0.432214	8.77435	5.91665	2.24154e-05	0.00225763	0.921115
ENSG00000182793	GSTA5	GSTA5_HUMAN	Q7RTV2	A_23_P93141	0.4545	8.1814	5.90524	2.29042e-05	0.00228087	0.941203
ENSG00000057252	SOAT1	SOAT1_HUMAN	P35610	A_32_P103131	0.615404	10.3267	5.90463	2.29307e-05	0.00228087	0.94229
ENSG00000249992	TMEM158	TM158_HUMAN	Q8WZ71	A_23_P369899	-0.629106	9.61836	-5.90393	2.29613e-05	0.00228087	0.94355
ENSG00000157150	TIMP4	TIMP4_HUMAN	Q99727	A_32_P70315	-0.835869	8.88769	-5.90357	2.29768e-05	0.00228087	0.944186
ENSG00000122786	CALD1	CALD1_HUMAN	Q05682	A_24_P921366	-0.966003	14.0251	-5.90352	2.29791e-05	0.00228087	0.944279
ENSG00000131746	TNS4	TENS4_HUMAN	Q8IZW8	A_23_P207850	0.662673	9.00315	5.89819	2.32123e-05	0.00229846	0.953863
ENSG00000110446	SLC15A3	S15A3_HUMAN	Q8IY34	A_23_P75786	-0.501965	7.79679	-5.8905	2.35527e-05	0.00232656	0.96785
ENSG00000111752	PHC1	PHC1_HUMAN	P78364	A_23_P323094	-0.814583	9.35975	-5.8858	2.37632e-05	0.00234173	0.976503
ENSG00000179899	-	-	-	A_23_P323094	-0.814583	9.35975	-5.8858	2.37632e-05	0.00234173	0.976503
ENSG00000153404	PLEKHG4B	PKH4B_HUMAN	Q96PX9	A_32_P129269	-0.695841	8.17738	-5.87532	2.42401e-05	0.00238301	0.996099
ENSG00000116044	NFE2L2	NF2L2_HUMAN	Q16236	A_23_P5761	0.410896	11.7088	5.87152	2.44155e-05	0.00239453	1
ENSG00000176204	LRRTM4	LRRT4_HUMAN	Q86VH4	A_24_P666105	0.596549	9.38839	5.86881	2.45413e-05	0.00240113	1
ENSG00000162852	CNST	CNST_HUMAN	Q6PJW8	A_23_P405175	-0.512869	8.78723	-5.86123	2.48967e-05	0.00242869	1
ENSG00000101955	SRPX	SRPX_HUMAN	P78539	A_23_P96383	0.610351	8.93338	5.85982	2.49635e-05	0.00242869	1
ENSG00000172020	GAP43	NEUM_HUMAN	P17677	A_23_P253446	-0.789916	8.82472	-5.84676	2.55907e-05	0.00247881	1
ENSG00000148834	GSTO1	GSTO1_HUMAN	P78417	A_23_P1254	0.418286	14.5308	5.84581	2.56368e-05	0.00247881	1
ENSG00000091136	LAMB1	LAMB1_HUMAN	P07942	A_23_P94030	0.379245	13.3947	5.84368	2.5741e-05	0.00248163	1
ENSG00000171724	VAT1L	VAT1L_HUMAN	Q9HCJ6	A_23_P400449	-0.888928	8.59521	-5.83809	2.60158e-05	0.00249782	1
ENSG00000162188	GNG3	GBG3_HUMAN	P63215	A_23_P139192	-0.510746	7.71468	-5.834	2.62191e-05	0.00251148	1
ENSG00000213211	-	-	-	A_23_P122650	0.452027	16.3914	5.83102	2.63677e-05	0.00251983	1
ENSG00000071967	CYBRD1	CYBR1_HUMAN	Q53TN4	A_24_P345451	-0.395757	8.11722	-5.82236	2.68062e-05	0.00255579	1
ENSG00000152601	MBNL1	MBNL1_HUMAN	Q9NR56	A_23_P357811	-0.601676	8.25096	-5.81743	2.70588e-05	0.0025739	1
ENSG00000145824	CXCL14	CXL14_HUMAN	O95715	A_23_P213745	-0.933563	9.62769	-5.80736	2.7583e-05	0.00261168	1
ENSG00000168077	SCARA3	SCAR3_HUMAN	Q6AZY7	A_23_P215900	-0.844647	11.1462	-5.80569	2.76709e-05	0.00261398	1
ENSG00000100625	SIX4	SIX4_HUMAN	Q9UIU6	A_32_P204205	-0.814491	9.01898	-5.80054	2.79438e-05	0.0026337	1
ENSG00000243836	-	-	-	A_32_P138396	0.43003	8.3748	5.79897	2.80274e-05	0.00263554	1
ENSG00000125871	MGME1	MGME1_HUMAN	Q9BQP7	A_24_P254285	-0.493802	9.6944	-5.7945	2.82675e-05	0.0026505	1
ENSG00000183287	CCBE1	CCBE1_HUMAN	Q6UXH8	A_32_P171043	0.739163	8.27456	5.79361	2.83155e-05	0.0026505	1
ENSG00000120875	DUSP4	DUS4_HUMAN	Q13115	A_23_P134935	0.358979	12.0796	5.78967	2.85291e-05	0.00266442	1
ENSG00000145536	ADAMTS16	ATS16_HUMAN	Q8TE57	A_23_P41629	-0.49294	7.5832	-5.78633	2.87113e-05	0.00267536	1
ENSG00000156011	PSD3	PSD3_HUMAN	Q9NYI0	A_23_P216167	-0.489823	8.70942	-5.78379	2.88508e-05	0.00267652	1
ENSG00000092445	TYRO3	TYRO3_HUMAN	Q06418	A_23_P54517	0.619132	12.7166	5.78255	2.89192e-05	0.00267652	1
ENSG00000132429	POPDC3	POPD3_HUMAN	Q9HBV1	A_23_P358597	0.395976	8.75652	5.77729	2.92113e-05	0.00269749	1
ENSG00000157110	RBPMS	RBPMS_HUMAN	Q93062	A_23_P71316	-0.552656	11.3199	-5.77581	2.9294e-05	0.00269905	1
ENSG00000086062	B4GALT1	B4GT1_HUMAN	P15291	A_24_P103803	0.456692	13.0481	5.7741	2.939e-05	0.00270184	1
ENSG00000139364	TMEM132B	T132B_HUMAN	Q14DG7	A_24_P6626	-0.417473	7.45857	-5.76615	2.98396e-05	0.00273705	1
ENSG00000198682	PAPSS2	PAPS2_HUMAN	O95340	A_24_P940166	0.446115	10.6643	5.76421	2.99506e-05	0.00274112	1
ENSG00000154310	TNIK	-	-	A_24_P350576	-0.703657	8.13999	-5.74436	3.11094e-05	0.00284084	1
ENSG00000118231	CRYGD	CRGD_HUMAN	P07320	A_23_P131215	-0.595146	9.00259	-5.7399	3.1376e-05	0.00285883	1
ENSG00000128408	RIBC2	RIBC2_HUMAN	Q9H4K1	A_23_P166526	0.434522	8.13513	5.73719	3.15391e-05	0.00286105	1
ENSG00000175183	CSRP2	CSRP2_HUMAN	Q16527	A_23_P44724	-0.477993	14.0025	-5.7371	3.15445e-05	0.00286105	1
ENSG00000244754	N4BP2L2	N42L2_HUMAN	Q92802	A_23_P65262	0.425069	8.1678	5.73532	3.16525e-05	0.00286105	1
ENSG00000266984	-	-	-	A_24_P59147	-0.399137	7.92361	-5.73488	3.16788e-05	0.00286105	1
ENSG00000132718	SYT11	SYT11_HUMAN	Q9BT88	A_24_P248240	-0.480174	7.69318	-5.72912	3.20305e-05	0.0028863	1
ENSG00000118231	CRYGD	CRGD_HUMAN	P07320	A_23_P320705	-0.659959	9.53807	-5.72801	3.20988e-05	0.0028863	1
ENSG00000130475	FCHO1	FCHO1_HUMAN	O14526	A_32_P459533	-0.487014	9.05815	-5.72036	3.25726e-05	0.00290805	1
ENSG00000060982	BCAT1	BCAT1_HUMAN	P54687	A_24_P52921	-0.521306	9.21964	-5.7196	3.26201e-05	0.00290805	1
ENSG00000254615	-	-	-	A_32_P151823	-0.491791	8.22715	-5.71785	3.27299e-05	0.00290805	1
ENSG00000244515	-	-	-	A_24_P186746	0.524072	13.7528	5.71772	3.27381e-05	0.00290805	1
ENSG00000006625	GGCT	GGCT_HUMAN	O75223	A_23_P42695	-0.433359	12.5864	-5.71678	3.27974e-05	0.00290805	1
ENSG00000182197	EXT1	EXT1_HUMAN	Q16394	A_23_P43273	0.416527	10.2068	5.71508	3.29039e-05	0.00290805	1
ENSG00000115919	KYNU	KYNU_HUMAN	Q16719	A_23_P56898	0.882547	9.00707	5.71504	3.29069e-05	0.00290805	1
ENSG00000136488	CSH1	CSH1_HUMAN	P0DML2	A_23_P381347	-0.759442	7.93984	-5.7131	3.30296e-05	0.00291263	1
ENSG00000213218	CSH1	CSH2_HUMAN	P0DML3	A_23_P381347	-0.759442	7.93984	-5.7131	3.30296e-05	0.00291263	1
ENSG00000213218	CSH2	CSH2_HUMAN	P0DML3	A_23_P381347	-0.759442	7.93984	-5.7131	3.30296e-05	0.00291263	1
ENSG00000102755	FLT1	VGFR1_HUMAN	P17948	A_24_P42755	-0.778119	9.66703	-5.70992	3.32317e-05	0.00292418	1
ENSG00000125266	EFNB2	EFNB2_HUMAN	P52799	A_24_P355944	-0.920016	9.34801	-5.7085	3.3322e-05	0.00292585	1
ENSG00000152061	RABGAP1L	RBG10_HUMAN	B7ZAP0	A_23_P200325	-0.45879	8.8687	-5.70186	3.37494e-05	0.00295707	1
ENSG00000152061	RABGAP1L	RBG1L_HUMAN	Q5R372	A_23_P200325	-0.45879	8.8687	-5.70186	3.37494e-05	0.00295707	1
ENSG00000134294	SLC38A2	S38A2_HUMAN	Q96QD8	A_23_P218079	-0.594263	11.7975	-5.69714	3.40568e-05	0.00296786	1
ENSG00000131507	NDFIP1	NFIP1_HUMAN	Q9BT67	A_23_P81241	0.376889	11.7911	5.69663	3.40898e-05	0.00296786	1
ENSG00000121057	AKAP1	AKAP1_HUMAN	Q92667	A_32_P132438	-0.554012	11.4154	-5.69598	3.41325e-05	0.00296786	1
ENSG00000170873	MTSS1	MTSS1_HUMAN	O43312	A_23_P347632	0.536964	9.26159	5.69554	3.41615e-05	0.00296786	1
ENSG00000164305	CASP3	CASP3_HUMAN	P42574	A_23_P92410	-0.680611	14.0409	-5.69374	3.42799e-05	0.00297187	1
ENSG00000224320	HLA-A	1A01_HUMAN	P30443	A_23_P408353	-0.435663	10.6244	-5.6897	3.45468e-05	0.0029887	1
ENSG00000224320	HLA-A	1A24_HUMAN	P05534	A_23_P408353	-0.435663	10.6244	-5.6897	3.45468e-05	0.0029887	1
ENSG00000224320	HLA-A	1A36_HUMAN	P30455	A_23_P408353	-0.435663	10.6244	-5.6897	3.45468e-05	0.0029887	1
ENSG00000224320	HLA-A	1A80_HUMAN	Q09160	A_23_P408353	-0.435663	10.6244	-5.6897	3.45468e-05	0.0029887	1
ENSG00000227715	HLA-A	1A02_HUMAN	P01892	A_23_P408353	-0.435663	10.6244	-5.6897	3.45468e-05	0.0029887	1
ENSG00000206505	HLA-A	1A25_HUMAN	P18462	A_23_P408353	-0.435663	10.6244	-5.6897	3.45468e-05	0.0029887	1
ENSG00000206505	HLA-A	1A26_HUMAN	P30450	A_23_P408353	-0.435663	10.6244	-5.6897	3.45468e-05	0.0029887	1
ENSG00000206505	HLA-A	1A34_HUMAN	P30453	A_23_P408353	-0.435663	10.6244	-5.6897	3.45468e-05	0.0029887	1
ENSG00000206505	HLA-A	1A43_HUMAN	P30456	A_23_P408353	-0.435663	10.6244	-5.6897	3.45468e-05	0.0029887	1
ENSG00000206505	HLA-A	1A66_HUMAN	P30457	A_23_P408353	-0.435663	10.6244	-5.6897	3.45468e-05	0.0029887	1
ENSG00000229215	HLA-A	1A01_HUMAN	P30443	A_23_P408353	-0.435663	10.6244	-5.6897	3.45468e-05	0.0029887	1
ENSG00000229215	HLA-A	1A24_HUMAN	P05534	A_23_P408353	-0.435663	10.6244	-5.6897	3.45468e-05	0.0029887	1
ENSG00000229215	HLA-A	1A36_HUMAN	P30455	A_23_P408353	-0.435663	10.6244	-5.6897	3.45468e-05	0.0029887	1
ENSG00000229215	HLA-A	1A80_HUMAN	Q09160	A_23_P408353	-0.435663	10.6244	-5.6897	3.45468e-05	0.0029887	1
ENSG00000206503	HLA-A	1A03_HUMAN	P04439	A_23_P408353	-0.435663	10.6244	-5.6897	3.45468e-05	0.0029887	1
ENSG00000206503	HLA-A	1A11_HUMAN	P13746	A_23_P408353	-0.435663	10.6244	-5.6897	3.45468e-05	0.0029887	1
ENSG00000206503	HLA-A	1A30_HUMAN	P16188	A_23_P408353	-0.435663	10.6244	-5.6897	3.45468e-05	0.0029887	1
ENSG00000223980	HLA-A	1A23_HUMAN	P30447	A_23_P408353	-0.435663	10.6244	-5.6897	3.45468e-05	0.0029887	1
ENSG00000223980	HLA-A	1A32_HUMAN	P10314	A_23_P408353	-0.435663	10.6244	-5.6897	3.45468e-05	0.0029887	1
ENSG00000223980	HLA-A	1A74_HUMAN	P30459	A_23_P408353	-0.435663	10.6244	-5.6897	3.45468e-05	0.0029887	1
ENSG00000235657	HLA-A	1A02_HUMAN	P01892	A_23_P408353	-0.435663	10.6244	-5.6897	3.45468e-05	0.0029887	1
ENSG00000235657	HLA-A	1A68_HUMAN	P01891	A_23_P408353	-0.435663	10.6244	-5.6897	3.45468e-05	0.0029887	1
ENSG00000235657	HLA-A	1A69_HUMAN	P10316	A_23_P408353	-0.435663	10.6244	-5.6897	3.45468e-05	0.0029887	1
ENSG00000231834	HLA-A	1A29_HUMAN	P30512	A_23_P408353	-0.435663	10.6244	-5.6897	3.45468e-05	0.0029887	1
ENSG00000231834	HLA-A	1A31_HUMAN	P16189	A_23_P408353	-0.435663	10.6244	-5.6897	3.45468e-05	0.0029887	1
ENSG00000231834	HLA-A	1A33_HUMAN	P16190	A_23_P408353	-0.435663	10.6244	-5.6897	3.45468e-05	0.0029887	1
ENSG00000136630	HLX	HLX_HUMAN	Q14774	A_23_P126266	0.700848	7.70983	5.68767	3.46821e-05	0.0029941	1
ENSG00000136059	VILL	VILL_HUMAN	O15195	A_23_P29684	0.432389	8.55823	5.68038	3.51715e-05	0.00302339	1
ENSG00000155657	TTN	TITIN_HUMAN	Q8WZ42	A_23_P85269	0.572976	10.3317	5.67958	3.52254e-05	0.00302339	1
ENSG00000124575	HIST1H1D	H13_HUMAN	P16402	A_24_P260639	-0.55936	12.1699	-5.67933	3.5242e-05	0.00302339	1
ENSG00000250266	-	-	-	A_32_P14222	0.735879	11.1966	5.67596	3.54711e-05	0.00303669	1
ENSG00000168461	RAB31	RAB31_HUMAN	Q13636	A_24_P236799	-0.608189	11.218	-5.67303	3.56719e-05	0.00304754	1
ENSG00000116031	CD207	CLC4K_HUMAN	Q9UJ71	A_23_P39790	-0.384246	7.01498	-5.6707	3.58318e-05	0.00305484	1
ENSG00000117643	MAN1C1	MA1C1_HUMAN	Q9NR34	A_23_P103601	-0.870075	10.2479	-5.66807	3.60138e-05	0.00306401	1
ENSG00000135838	NPL	NPL_HUMAN	Q9BXD5	A_23_P381431	0.537418	9.06371	5.65596	3.68634e-05	0.00312981	1
ENSG00000117394	SLC2A1	GTR1_HUMAN	P11166	A_23_P571	-0.750557	12.3694	-5.64939	3.73323e-05	0.00316309	1
ENSG00000171914	TLN2	TLN2_HUMAN	Q9Y4G6	A_24_P347566	0.485568	10.7914	5.64634	3.75528e-05	0.00316926	1
ENSG00000165494	PCF11	PCF11_HUMAN	O94913	A_24_P835763	0.412115	8.87033	5.64519	3.76361e-05	0.00316926	1
ENSG00000139946	PELI2	PELI2_HUMAN	Q9HAT8	A_23_P65532	-0.586763	8.49582	-5.64518	3.76365e-05	0.00316926	1
ENSG00000146938	NLGN4X	NLGNX_HUMAN	Q8N0W4	A_23_P364592	-0.604959	8.99965	-5.64411	3.77143e-05	0.00316932	1
ENSG00000179761	PIPOX	SOX_HUMAN	Q9P0Z9	A_23_P164258	-0.462753	8.33567	-5.6422	3.78533e-05	0.0031745	1
ENSG00000163531	NFASC	NFASC_HUMAN	O94856	A_24_P350656	0.376852	10.6873	5.64043	3.79829e-05	0.00317888	1
ENSG00000113083	LOX	LYOX_HUMAN	P28300	A_23_P122216	0.448044	9.23642	5.63894	3.80917e-05	0.00318151	1
ENSG00000234224	TMEM229A	T229A_HUMAN	B2RXF0	A_32_P47027	0.432562	9.48384	5.63645	3.82751e-05	0.00318564	1
ENSG00000176170	SPHK1	SPHK1_HUMAN	Q9NYA1	A_23_P38106	0.344606	7.81774	5.63617	3.82962e-05	0.00318564	1
ENSG00000170542	SERPINB9	SPB9_HUMAN	P50453	A_24_P295010	-0.60329	12.7581	-5.6325	3.85675e-05	0.00320173	1
ENSG00000162493	PDPN	PDPN_HUMAN	Q86YL7	A_23_P430068	-0.500201	10.707	-5.62562	3.9083e-05	0.0032317	1
ENSG00000100196	KDELR3	ERD23_HUMAN	O43731	A_23_P211504	0.459965	9.09315	5.62487	3.91396e-05	0.0032317	1
ENSG00000184005	ST6GALNAC3	SIA7C_HUMAN	Q8NDV1	A_23_P416711	-0.440811	8.40033	-5.62454	3.91645e-05	0.0032317	1
ENSG00000149435	GGTLC1	GGTL1_HUMAN	Q9BX51	A_23_P57199	0.517284	9.98361	5.6158	3.98313e-05	0.00328013	1
ENSG00000060982	BCAT1	BCAT1_HUMAN	P54687	A_24_P935986	-0.540349	13.1352	-5.61453	3.99287e-05	0.00328158	1
ENSG00000204414	CSHL1	CSHL_HUMAN	Q14406	A_23_P344408	-0.527385	7.7954	-5.61281	4.00616e-05	0.00328593	1
ENSG00000038427	VCAN	CSPG2_HUMAN	P13611	A_23_P144959	-0.63393	10.4303	-5.61028	4.0258e-05	0.00329546	1
ENSG00000130517	PGPEP1	PGPI_HUMAN	Q9NXJ5	A_23_P218531	-0.590681	8.83253	-5.60822	4.04188e-05	0.00330204	1
ENSG00000176826	-	-	-	A_23_P334709	0.494145	12.5694	5.59892	4.11516e-05	0.00335524	1
ENSG00000122642	FKBP9	FKBP9_HUMAN	O95302	A_23_P334709	0.494145	12.5694	5.59892	4.11516e-05	0.00335524	1
ENSG00000115085	ZAP70	ZAP70_HUMAN	P43403	A_23_P39682	0.512153	8.93776	5.59788	4.1234e-05	0.0033553	1
ENSG00000121210	KIAA0922	T131L_HUMAN	A2VDJ0	A_23_P257250	-0.431108	7.94199	-5.59622	4.13667e-05	0.00335945	1
ENSG00000196418	ZNF124	ZN124_HUMAN	Q15973	A_32_P875758	0.511842	9.67811	5.59333	4.15984e-05	0.00336749	1
ENSG00000065183	WDR3	WDR3_HUMAN	Q9UNX4	A_23_P23318	-0.477549	10.4997	-5.59246	4.16688e-05	0.00336749	1
ENSG00000173598	NUDT4	NUDT4_HUMAN	Q9NZJ9	A_24_P67946	0.515791	10.5401	5.59193	4.17115e-05	0.00336749	1
ENSG00000170745	KCNS3	KCNS3_HUMAN	Q9BQ31	A_23_P120103	-0.476346	9.95779	-5.58712	4.21015e-05	0.00339231	1
ENSG00000075420	FNDC3B	FND3B_HUMAN	Q53EP0	A_24_P223124	0.443019	11.691	5.58136	4.25729e-05	0.00342358	1
ENSG00000185670	ZBTB3	ZBTB3_HUMAN	Q9H5J0	A_23_P430181	-0.545288	10.8138	-5.5763	4.29922e-05	0.00344594	1
ENSG00000122824	NUDT10	NUD10_HUMAN	Q8NFP7	A_24_P400044	-0.505808	8.6061	-5.57598	4.30186e-05	0.00344594	1
ENSG00000129538	RNASE1	RNAS1_HUMAN	P07998	A_23_P48596	0.906032	10.198	5.57202	4.335e-05	0.00346042	1
ENSG00000159658	EFCAB14	EFC14_HUMAN	O75071	A_24_P233917	0.494945	10.8134	5.5718	4.33679e-05	0.00346042	1
ENSG00000183690	EFHC2	EFHC2_HUMAN	Q5JST6	A_24_P147927	0.376515	7.26982	5.56655	4.38114e-05	0.00348692	1
ENSG00000221994	ZNF630	ZN630_HUMAN	Q2M218	A_23_P390384	0.544296	9.75945	5.56587	4.38697e-05	0.00348692	1
ENSG00000174607	UGT8	CGT_HUMAN	Q16880	A_24_P103264	-0.459918	7.8623	-5.56287	4.41251e-05	0.00350045	1
ENSG00000103490	PYCARD	ASC_HUMAN	Q9ULZ3	A_23_P26629	-0.50742	10.7257	-5.55731	4.46033e-05	0.00353157	1
ENSG00000102871	TRADD	TRADD_HUMAN	Q15628	A_23_P54649	0.506905	10.6856	5.55369	4.49172e-05	0.00354958	1
ENSG00000182054	IDH2	IDHP_HUMAN	P48735	A_23_P129209	-0.582306	9.684	-5.54898	4.53295e-05	0.00357484	1
ENSG00000122376	FAM35A	FA35A_HUMAN	Q86V20	A_23_P127279	-0.84936	11.6102	-5.54806	4.54108e-05	0.00357484	1
ENSG00000117600	LPPR4	-	-	A_32_P148538	-0.679749	7.83391	-5.5432	4.58409e-05	0.00360098	1
ENSG00000140263	SORD	DHSO_HUMAN	Q00796	A_23_P77103	-0.60513	10.2046	-5.54233	4.59182e-05	0.00360098	1
ENSG00000259479	-	-	-	A_23_P77103	-0.60513	10.2046	-5.54233	4.59182e-05	0.00360098	1
ENSG00000129946	SHC2	SHC2_HUMAN	P98077	A_32_P205624	0.587492	12.0509	5.53838	4.62712e-05	0.00362176	1
ENSG00000100612	DHRS7	DHRS7_HUMAN	Q9Y394	A_23_P117506	0.429411	10.9461	5.53476	4.6598e-05	0.00364041	1
ENSG00000254531	-	-	-	A_32_P131929	0.423684	10.3397	5.52907	4.71154e-05	0.00367384	1
ENSG00000229891	-	-	-	A_23_P166508	-0.516755	11.02	-5.52344	4.76337e-05	0.00369578	1
ENSG00000197406	DIO3	IOD3_HUMAN	P55073	A_23_P105923	0.719919	12.3054	5.52273	4.76992e-05	0.00369578	1
ENSG00000156500	FAM122C	F222C_HUMAN	Q6P4D5	A_24_P674479	0.548106	9.83208	5.52246	4.77238e-05	0.00369578	1
ENSG00000156500	RP3-473B4.1	F222C_HUMAN	Q6P4D5	A_24_P674479	0.548106	9.83208	5.52246	4.77238e-05	0.00369578	1
ENSG00000136153	LMO7	LMO7_HUMAN	Q8WWI1	A_24_P301146	-0.466122	9.23765	-5.52211	4.77565e-05	0.00369578	1
ENSG00000176076	KCNE1L	KCE1L_HUMAN	Q9UJ90	A_23_P256641	-0.483304	8.15056	-5.51816	4.81249e-05	0.00371729	1
ENSG00000068366	ACSL4	ACSL4_HUMAN	O60488	A_23_P256641	-0.483304	8.15056	-5.51816	4.81249e-05	0.00371729	1
ENSG00000252059	-	-	-	A_32_P151544	0.400095	16.8256	5.51471	4.8448e-05	0.0037306	1
ENSG00000214207	-	-	-	A_32_P151544	0.400095	16.8256	5.51471	4.8448e-05	0.0037306	1
ENSG00000111057	KRT18	K1C18_HUMAN	P05783	A_32_P151544	0.400095	16.8256	5.51471	4.8448e-05	0.0037306	1
ENSG00000175029	CTBP2	CTBP2_HUMAN	P56545	A_23_P63897	-0.500236	14.5011	-5.51289	4.86205e-05	0.0037306	1
ENSG00000138030	KHK	KHK_HUMAN	P50053	A_23_P5845	-0.424621	8.73025	-5.51279	4.86294e-05	0.0037306	1
ENSG00000138642	HERC6	HERC6_HUMAN	Q8IVU3	A_23_P250353	-0.452226	9.21649	-5.51246	4.86604e-05	0.0037306	1
ENSG00000117877	CD3EAP	RPA34_HUMAN	O15446	A_24_P267452	-0.639325	9.8981	-5.5073	4.91516e-05	0.00376124	1
ENSG00000214794	-	-	-	A_24_P350060	0.426179	15.6542	5.50426	4.94433e-05	0.0037718	1
ENSG00000230669	PSMB8	PSB8_HUMAN	P28062	A_23_P250629	-0.495354	7.74957	-5.50395	4.94731e-05	0.0037718	1
ENSG00000226201	PSMB8	PSB8_HUMAN	P28062	A_23_P250629	-0.495354	7.74957	-5.50395	4.94731e-05	0.0037718	1
ENSG00000204264	PSMB8	PSB8_HUMAN	P28062	A_23_P250629	-0.495354	7.74957	-5.50395	4.94731e-05	0.0037718	1
ENSG00000231631	PSMB8	PSB8_HUMAN	P28062	A_23_P250629	-0.495354	7.74957	-5.50395	4.94731e-05	0.0037718	1
ENSG00000236443	PSMB8	PSB8_HUMAN	P28062	A_23_P250629	-0.495354	7.74957	-5.50395	4.94731e-05	0.0037718	1
ENSG00000230034	PSMB8	PSB8_HUMAN	P28062	A_23_P250629	-0.495354	7.74957	-5.50395	4.94731e-05	0.0037718	1
ENSG00000235715	PSMB8	PSB8_HUMAN	P28062	A_23_P250629	-0.495354	7.74957	-5.50395	4.94731e-05	0.0037718	1
ENSG00000206298	PSMB8	PSB8_HUMAN	P28062	A_23_P250629	-0.495354	7.74957	-5.50395	4.94731e-05	0.0037718	1
ENSG00000159921	GNE	GLCNE_HUMAN	Q9Y223	A_23_P216489	-0.595165	9.36228	-5.49474	5.03677e-05	0.00383289	1
ENSG00000179059	ZFP42	ZFP42_HUMAN	Q96MM3	A_23_P395582	-0.478657	13.1656	-5.49189	5.06474e-05	0.00384055	1
ENSG00000135299	ANKRD6	ANKR6_HUMAN	Q9Y2G4	A_23_P70297	0.50148	10.5864	5.49181	5.06553e-05	0.00384055	1
ENSG00000265808	SEC22B	SC22B_HUMAN	O75396	A_23_P200815	0.466912	9.71469	5.49032	5.08027e-05	0.00384463	1
ENSG00000163530	DPPA2	DPPA2_HUMAN	Q7Z7J5	A_23_P405885	-0.603734	9.27672	-5.48863	5.09704e-05	0.00385023	1
ENSG00000170011	MYRIP	MYRIP_HUMAN	Q8NFW9	A_23_P326760	0.492741	8.40679	5.48723	5.11097e-05	0.00385177	1
ENSG00000156011	PSD3	PSD3_HUMAN	Q9NYI0	A_23_P20392	-0.48706	7.85855	-5.48638	5.11942e-05	0.00385177	1
ENSG00000138646	HERC5	HERC5_HUMAN	Q9UII4	A_23_P110196	-0.462108	9.55022	-5.48503	5.13289e-05	0.00385177	1
ENSG00000103005	USB1	USB1_HUMAN	Q9BQ65	A_24_P107941	0.448711	14.1086	5.48466	5.13657e-05	0.00385177	1
ENSG00000123104	ITPR2	ITPR2_HUMAN	Q14571	A_23_P203933	-0.519134	7.88259	-5.48107	5.1726e-05	0.00387172	1
ENSG00000106012	IQCE	IQCE_HUMAN	Q6IPM2	A_23_P19852	0.45346	9.7552	5.47984	5.18509e-05	0.00387402	1
ENSG00000154537	FAM27A	FAM27_HUMAN	Q5VT28	A_24_P342096	0.454372	8.61095	5.47279	5.25676e-05	0.00389972	1
ENSG00000154537	FAM27B	FAM27_HUMAN	Q5VT28	A_24_P342096	0.454372	8.61095	5.47279	5.25676e-05	0.00389972	1
ENSG00000154537	FAM27C	FAM27_HUMAN	Q5VT28	A_24_P342096	0.454372	8.61095	5.47279	5.25676e-05	0.00389972	1
ENSG00000278763	-	-	-	A_24_P342096	0.454372	8.61095	5.47279	5.25676e-05	0.00389972	1
ENSG00000139364	TMEM132B	T132B_HUMAN	Q14DG7	A_32_P153812	-0.406968	8.1147	-5.47224	5.26246e-05	0.00389972	1
ENSG00000163931	TKT	TKT_HUMAN	P29401	A_23_P92082	-0.553762	16.1014	-5.47196	5.26531e-05	0.00389972	1
ENSG00000189221	MAOA	AOFA_HUMAN	P21397	A_23_P83857	-0.54165	8.77831	-5.47165	5.26845e-05	0.00389972	1
ENSG00000164647	STEAP1	STEA1_HUMAN	Q9UHE8	A_23_P31453	-0.461468	8.03735	-5.47143	5.27077e-05	0.00389972	1
ENSG00000087245	MMP2	MMP2_HUMAN	P08253	A_23_P163787	-0.357421	8.46471	-5.46929	5.29282e-05	0.00389972	1
ENSG00000066777	ARFGEF1	BIG1_HUMAN	Q9Y6D6	A_23_P82941	-0.398656	10.3545	-5.46902	5.29559e-05	0.00389972	1
ENSG00000145685	LHFPL2	LHPL2_HUMAN	Q6ZUX7	A_23_P255104	0.50912	12.87	5.46793	5.30684e-05	0.00389972	1
ENSG00000203706	-	-	-	A_32_P207169	-0.717116	8.5125	-5.46774	5.30876e-05	0.00389972	1
ENSG00000178401	DNAJC22	DJC22_HUMAN	Q8N4W6	A_23_P253661	0.459165	8.60944	5.4672	5.31439e-05	0.00389972	1
ENSG00000107831	FGF8	FGF8_HUMAN	P55075	A_23_P46829	-0.484568	9.33141	-5.46406	5.34702e-05	0.00391196	1
ENSG00000102230	PCYT1B	PCY1B_HUMAN	Q9Y5K3	A_24_P941353	-0.514978	8.08806	-5.46264	5.36188e-05	0.00391196	1
ENSG00000230216	-	-	-	A_24_P178167	0.445042	12.3262	5.46252	5.3631e-05	0.00391196	1
ENSG00000017483	SLC38A5	S38A5_HUMAN	Q8WUX1	A_23_P84929	0.634006	11.6524	5.46194	5.36915e-05	0.00391196	1
ENSG00000144668	ITGA9	ITA9_HUMAN	Q13797	A_23_P252193	0.490962	9.86561	5.45774	5.41333e-05	0.00393021	1
ENSG00000121297	TSHZ3	TSH3_HUMAN	Q63HK5	A_23_P361014	-0.584483	9.71142	-5.45502	5.44214e-05	0.00394416	1
ENSG00000068831	RASGRP2	GRP2_HUMAN	Q7LDG7	A_23_P64058	-0.605571	8.97227	-5.45245	5.46959e-05	0.00395708	1
ENSG00000116774	OLFML3	OLFL3_HUMAN	Q9NRN5	A_32_P24832	-0.572535	9.33377	-5.44726	5.52521e-05	0.00399029	1
ENSG00000163349	HIPK1	HIPK1_HUMAN	Q86Z02	A_32_P24832	-0.572535	9.33377	-5.44726	5.52521e-05	0.00399029	1
ENSG00000065882	TBC1D1	TBCD1_HUMAN	Q86TI0	A_23_P73023	-0.500321	11.1194	-5.44394	5.56122e-05	0.00400542	1
ENSG00000177459	ERICH5	ERIC5_HUMAN	Q6P6B1	A_23_P333029	-0.745455	9.29584	-5.44353	5.56565e-05	0.00400542	1
ENSG00000277639	-	-	-	A_32_P150152	0.661266	8.83643	5.43887	5.61658e-05	0.0040331	1
ENSG00000184564	-	-	-	A_23_P65307	-0.397515	7.32966	-5.43821	5.62375e-05	0.0040331	1
ENSG00000197594	ENPP1	ENPP1_HUMAN	P22413	A_23_P156880	-0.639719	11.3541	-5.42942	5.72119e-05	0.0040887	1
ENSG00000198301	SDAD1	SDA1_HUMAN	Q9NVU7	A_24_P397247	-0.523009	10.0608	-5.42929	5.72265e-05	0.0040887	1
ENSG00000182253	SYNM	SYNEM_HUMAN	O15061	A_24_P104407	-0.543807	8.80517	-5.42714	5.74677e-05	0.00409276	1
ENSG00000135046	ANXA1	ANXA1_HUMAN	P04083	A_23_P94501	-1.46875	12.7312	-5.42553	5.76488e-05	0.00409777	1
ENSG00000133678	TMEM254	TM254_HUMAN	Q8TBM7	A_23_P97853	0.430493	10.7986	5.42475	5.77375e-05	0.00409777	1
ENSG00000204381	LAYN	LAYN_HUMAN	Q6UX15	A_23_P127565	-0.56217	8.29939	-5.42084	5.818e-05	0.00410943	1
ENSG00000158427	TMSB15B	TB15B_HUMAN	P0CG35	A_23_P96599	0.681513	12.4739	5.42071	5.81956e-05	0.00410943	1
ENSG00000269226	TMSB15B	TB15B_HUMAN	P0CG35	A_23_P96599	0.681513	12.4739	5.42071	5.81956e-05	0.00410943	1
ENSG00000250504	-	-	-	A_24_P42136	0.480921	15.066	5.41685	5.86358e-05	0.00413297	1
ENSG00000183199	-	-	-	A_24_P161525	-0.609361	12.569	-5.41473	5.88805e-05	0.00414311	1
ENSG00000154917	RAB6B	RAB6B_HUMAN	Q9NRW1	A_24_P475349	0.366445	7.64954	5.4094	5.94974e-05	0.0041727	1
ENSG00000181350	LRRC75A	LR75A_HUMAN	Q8NAA5	A_23_P368484	-0.412342	8.35959	-5.40934	5.95041e-05	0.0041727	1
ENSG00000106436	MYL10	MYL10_HUMAN	Q9BUA6	A_23_P393015	-0.587951	8.02253	-5.40596	5.98998e-05	0.00419329	1
ENSG00000189067	LITAF	LITAF_HUMAN	Q99732	A_23_P3532	-0.452061	9.88247	-5.40314	6.02308e-05	0.00420474	1
ENSG00000131650	-	-	-	A_23_P77612	0.57409	10.7839	5.40267	6.02868e-05	0.00420474	1
ENSG00000125848	FLRT3	FLRT3_HUMAN	Q9NZU0	A_23_P166109	0.443381	12.7329	5.40196	6.03703e-05	0.00420474	1
ENSG00000132470	ITGB4	ITB4_HUMAN	P16144	A_23_P66355	-0.498142	8.10941	-5.39936	6.0679e-05	0.00421909	1
ENSG00000099204	ABLIM1	ABLM1_HUMAN	O14639	A_23_P202520	-0.501834	12.3504	-5.39614	6.10631e-05	0.00423863	1
ENSG00000104312	RIPK2	RIPK2_HUMAN	O43353	A_24_P124032	0.448575	9.94874	5.39181	6.15824e-05	0.00426746	1
ENSG00000173193	PARP14	PAR14_HUMAN	Q460N5	A_24_P161018	-0.438045	7.92587	-5.38548	6.23521e-05	0.00431002	1
ENSG00000135842	FAM129A	NIBAN_HUMAN	Q9BZQ8	A_24_P233786	0.570646	10.2164	5.38503	6.24063e-05	0.00431002	1
ENSG00000131018	SYNE1	SYNE1_HUMAN	Q8NF91	A_23_P500861	0.329591	8.30704	5.3821	6.27659e-05	0.00432262	1
ENSG00000267153	-	-	-	A_24_P229903	-0.556627	10.2846	-5.38183	6.27992e-05	0.00432262	1
ENSG00000104325	DECR1	DECR_HUMAN	Q16698	A_24_P269619	0.391678	10.6059	5.37912	6.3134e-05	0.00433841	1
ENSG00000164741	DLC1	RHG07_HUMAN	Q96QB1	A_24_P940115	0.453744	10.7452	5.37515	6.36274e-05	0.00436322	1
ENSG00000109610	SOD3	SODE_HUMAN	P08294	A_23_P254741	0.813982	11.2604	5.37451	6.37075e-05	0.00436322	1
ENSG00000107821	KAZALD1	KAZD1_HUMAN	Q96I82	A_24_P192727	0.481232	9.33273	5.37268	6.39372e-05	0.00436753	1
ENSG00000162998	FRZB	SFRP3_HUMAN	Q92765	A_23_P10902	0.867475	12.4911	5.37231	6.39831e-05	0.00436753	1
ENSG00000141744	PNMT	PNMT_HUMAN	P11086	A_23_P100642	-0.45546	8.01438	-5.37116	6.4128e-05	0.00437017	1
ENSG00000112715	VEGFA	VEGFA_HUMAN	P15692	A_24_P12401	0.534959	9.34946	5.36655	6.47101e-05	0.00440254	1
ENSG00000006059	KRT33A	KT33A_HUMAN	O76009	A_23_P78265	0.594674	9.96784	5.36452	6.49688e-05	0.00440555	1
ENSG00000102802	MEDAG	MEDAG_HUMAN	Q5VYS4	A_23_P99515	-0.393815	7.40876	-5.3627	6.52019e-05	0.00440681	1
ENSG00000105323	HNRNPUL1	HNRL1_HUMAN	Q9BUJ2	A_24_P108351	-0.430495	10.3025	-5.36127	6.53846e-05	0.0044119	1
ENSG00000090097	PCBP4	PCBP4_HUMAN	P57723	A_23_P166807	0.411767	13.3372	5.35843	6.5751e-05	0.00442935	1
ENSG00000001561	ENPP4	ENPP4_HUMAN	Q9Y6X5	A_23_P70318	0.500499	9.287	5.35739	6.58846e-05	0.00443109	1
ENSG00000105514	RAB3D	RAB3D_HUMAN	O95716	A_24_P236956	0.346611	10.6616	5.35122	6.66886e-05	0.00447783	1
ENSG00000112183	RBM24	RBM24_HUMAN	Q9BX46	A_23_P167812	0.513543	8.91755	5.3494	6.69271e-05	0.00448601	1
ENSG00000092621	PHGDH	SERA_HUMAN	O43175	A_23_P85783	-0.474828	13.8057	-5.34863	6.70287e-05	0.00448601	1
ENSG00000254788	CKLF	-	-	A_23_P206396	0.43948	11.3809	5.34644	6.73183e-05	0.00449807	1
ENSG00000254788	CKLF-CMTM1	-	-	A_23_P206396	0.43948	11.3809	5.34644	6.73183e-05	0.00449807	1
ENSG00000217555	CKLF	-	-	A_23_P206396	0.43948	11.3809	5.34644	6.73183e-05	0.00449807	1
ENSG00000106025	TSPAN12	TSN12_HUMAN	O95859	A_23_P145984	0.402164	9.79426	5.34333	6.77304e-05	0.00450425	1
ENSG00000146592	CREB5	CREB5_HUMAN	Q02930	A_23_P157117	-0.54685	7.91583	-5.34309	6.77623e-05	0.00450425	1
ENSG00000101470	TNNC2	TNNC2_HUMAN	P02585	A_23_P131825	-0.489222	8.47976	-5.34292	6.77847e-05	0.00450425	1
ENSG00000168214	RBPJ	SUH_HUMAN	Q06330	A_24_P54797	-0.463918	10.7385	-5.34244	6.78493e-05	0.00450425	1
ENSG00000115474	KCNJ13	KCJ13_HUMAN	O60928	A_23_P312752	0.471274	7.70574	5.34045	6.81151e-05	0.0045146	1
ENSG00000088756	ARHGAP28	RHG28_HUMAN	Q9P2N2	A_24_P579356	0.409068	10.9252	5.3346	6.89028e-05	0.00455904	1
ENSG00000170369	CST2	CYTT_HUMAN	P09228	A_24_P237175	1.1447	12.0366	5.33383	6.90074e-05	0.00455904	1
ENSG00000135069	PSAT1	SERC_HUMAN	Q9Y617	A_23_P259692	-0.566738	13.2194	-5.329	6.96667e-05	0.00459498	1
ENSG00000230787	-	-	-	A_23_P259692	-0.566738	13.2194	-5.329	6.96667e-05	0.00459498	1
ENSG00000175857	GAPT	GAPT_HUMAN	Q8N292	A_24_P303127	0.395264	7.297	5.32821	6.97751e-05	0.00459498	1
ENSG00000110799	VWF	VWF_HUMAN	P04275	A_23_P105562	0.506452	13.8345	5.31907	7.10414e-05	0.00467089	1
ENSG00000167992	VWCE	VWCE_HUMAN	Q96DN2	A_23_P52986	-0.663565	12.3638	-5.31695	7.13381e-05	0.00467787	1
ENSG00000107815	PEO1	PEO1_HUMAN	Q96RR1	A_23_P138461	-0.400091	8.6029	-5.31446	7.16895e-05	0.0046841	1
ENSG00000271601	LIX1L	LIX1L_HUMAN	Q8IVB5	A_24_P687594	0.474729	9.65282	5.3144	7.16983e-05	0.0046841	1
ENSG00000164182	NDUFAF2	MIMIT_HUMAN	Q8N183	A_23_P345942	-0.463256	11.1804	-5.31197	7.20424e-05	0.00469458	1
ENSG00000211772	TRBC2	-	-	A_23_P352861	-0.860939	10.4181	-5.31165	7.20872e-05	0.00469458	1
ENSG00000163216	SPRR2D	SPR2D_HUMAN	P22532	A_23_P11644	0.406947	7.46239	5.30866	7.25133e-05	0.00471486	1
ENSG00000171517	LPAR3	LPAR3_HUMAN	Q9UBY5	A_23_P35035	-0.581821	8.10233	-5.29966	7.38112e-05	0.00478453	1
ENSG00000279307	-	-	-	A_23_P360983	-0.574524	11.6468	-5.29961	7.38177e-05	0.00478453	1
ENSG00000164182	NDUFAF2	MIMIT_HUMAN	Q8N183	A_23_P360983	-0.574524	11.6468	-5.29961	7.38177e-05	0.00478453	1
ENSG00000103061	SLC7A6OS	S7A6O_HUMAN	Q96CW6	A_23_P3562	0.385314	10.7693	5.2982	7.40238e-05	0.00479033	1
ENSG00000165480	SKA3	SKA3_HUMAN	Q8IX90	A_23_P340909	-0.484342	11.3625	-5.29495	7.44988e-05	0.00481349	1
ENSG00000144645	OSBPL10	OSB10_HUMAN	Q9BXB5	A_24_P117902	-0.520028	8.51852	-5.28785	7.55498e-05	0.00486767	1
ENSG00000162444	RBP7	RET7_HUMAN	Q96R05	A_24_P165423	-0.534187	9.2142	-5.28769	7.55743e-05	0.00486767	1
ENSG00000162998	FRZB	SFRP3_HUMAN	Q92765	A_23_P363778	0.878755	11.9457	5.28501	7.59745e-05	0.00488579	1
ENSG00000096696	DSP	DESP_HUMAN	P15924	A_32_P157945	0.496047	13.4426	5.27883	7.69058e-05	0.00493795	1
ENSG00000197893	NRAP	NRAP_HUMAN	Q86VF7	A_23_P402765	0.416645	7.5755	5.27602	7.73342e-05	0.00495242	1
ENSG00000015153	YAF2	YAF2_HUMAN	Q8IY57	A_23_P139825	0.462539	8.52088	5.27577	7.73721e-05	0.00495242	1
ENSG00000156345	CDK20	CDK20_HUMAN	Q8IZL9	A_23_P20752	0.392621	9.75006	5.27479	7.7523e-05	0.00495436	1
ENSG00000165731	RET	RET_HUMAN	P07949	A_23_P202245	-0.476484	8.06069	-5.27126	7.80652e-05	0.00498126	1
ENSG00000269713	NBPF9	-	-	A_32_P27020	0.505763	12.3029	5.26654	7.87963e-05	0.00502012	1
ENSG00000268043	NBPF12	-	-	A_32_P27020	0.505763	12.3029	5.26654	7.87963e-05	0.00502012	1
ENSG00000263956	NBPF11	NBPFB_HUMAN	Q86T75	A_32_P27020	0.505763	12.3029	5.26654	7.87963e-05	0.00502012	1
ENSG00000270231	-	-	-	A_32_P27020	0.505763	12.3029	5.26654	7.87963e-05	0.00502012	1
ENSG00000162825	NBPF8	-	-	A_32_P27020	0.505763	12.3029	5.26654	7.87963e-05	0.00502012	1
ENSG00000272150	-	-	-	A_32_P27020	0.505763	12.3029	5.26654	7.87963e-05	0.00502012	1
ENSG00000266338	NBPF15	NBPFF_HUMAN	Q8N660	A_32_P27020	0.505763	12.3029	5.26654	7.87963e-05	0.00502012	1
ENSG00000271383	NBPF14	-	-	A_32_P27020	0.505763	12.3029	5.26654	7.87963e-05	0.00502012	1
ENSG00000273136	NBPF26	-	-	A_32_P27020	0.505763	12.3029	5.26654	7.87963e-05	0.00502012	1
ENSG00000156687	UNC5D	UNC5D_HUMAN	Q6UXZ4	A_23_P216118	-0.458456	9.37311	-5.2652	7.90048e-05	0.00502334	1
ENSG00000157600	RP13-360B22.2	TM164_HUMAN	Q5U3C3	A_23_P96041	0.402285	11.102	5.26436	7.91354e-05	0.00502334	1
ENSG00000157600	TMEM164	TM164_HUMAN	Q5U3C3	A_23_P96041	0.402285	11.102	5.26436	7.91354e-05	0.00502334	1
ENSG00000168917	SLC35G2	S35G2_HUMAN	Q8TBE7	A_23_P109655	-0.543645	8.22433	-5.26386	7.92137e-05	0.00502334	1
ENSG00000275074	NUDT18	NUD18_HUMAN	Q6ZVK8	A_23_P123454	0.336822	8.75917	5.26192	7.95175e-05	0.00502663	1
ENSG00000232239	-	-	-	A_24_P796652	-0.404488	10.6833	-5.26123	7.96264e-05	0.00502663	1
ENSG00000227924	-	-	-	A_24_P796652	-0.404488	10.6833	-5.26123	7.96264e-05	0.00502663	1
ENSG00000234217	-	-	-	A_24_P796652	-0.404488	10.6833	-5.26123	7.96264e-05	0.00502663	1
ENSG00000274181	-	-	-	A_24_P796652	-0.404488	10.6833	-5.26123	7.96264e-05	0.00502663	1
ENSG00000112494	UNC93A	UN93A_HUMAN	Q86WB7	A_24_P103434	0.436148	7.2038	5.26079	7.96955e-05	0.00502663	1
ENSG00000163092	XIRP2	XIRP2_HUMAN	A4UGR9	A_23_P108743	-0.336125	7.04514	-5.26042	7.97548e-05	0.00502663	1
ENSG00000198162	MAN1A2	MA1A2_HUMAN	O60476	A_24_P926195	0.501678	10.2533	5.25885	8.00018e-05	0.00503448	1
ENSG00000185432	METTL7A	MET7A_HUMAN	Q9H8H3	A_23_P415021	-0.657103	9.33435	-5.25499	8.06149e-05	0.00505745	1
ENSG00000175287	PHYHD1	PHYD1_HUMAN	Q5SRE7	A_23_P72001	-0.382829	10.0861	-5.25487	8.06335e-05	0.00505745	1
ENSG00000072818	ACAP1	ACAP1_HUMAN	Q15027	A_23_P107336	-0.402411	7.55139	-5.25418	8.0744e-05	0.00505745	1
ENSG00000140743	CDR2	CDR2_HUMAN	Q01850	A_24_P339071	-0.557831	10.1384	-5.25165	8.11493e-05	0.00505915	1
ENSG00000152061	RABGAP1L	RBG10_HUMAN	B7ZAP0	A_24_P333525	-0.488518	9.38871	-5.25128	8.12082e-05	0.00505915	1
ENSG00000152061	RABGAP1L	RBG1L_HUMAN	Q5R372	A_24_P333525	-0.488518	9.38871	-5.25128	8.12082e-05	0.00505915	1
ENSG00000198947	DMD	DMD_HUMAN	P11532	A_24_P185854	0.42725	8.92554	5.25098	8.12557e-05	0.00505915	1
ENSG00000116771	AGMAT	SPEB_HUMAN	Q9BSE5	A_23_P103720	-0.438237	8.34724	-5.24933	8.15224e-05	0.00506075	1
ENSG00000203805	PPAPDC1A	PPC1A_HUMAN	Q5VZY2	A_24_P810290	0.470793	10.3812	5.24929	8.15277e-05	0.00506075	1
ENSG00000128422	KRT17	K1C17_HUMAN	Q04695	A_24_P610945	0.584531	12.6536	5.24702	8.18954e-05	0.00507591	1
ENSG00000186831	-	-	-	A_24_P610945	0.584531	12.6536	5.24702	8.18954e-05	0.00507591	1
ENSG00000131885	-	-	-	A_24_P610945	0.584531	12.6536	5.24702	8.18954e-05	0.00507591	1
ENSG00000231645	-	-	-	A_24_P610945	0.584531	12.6536	5.24702	8.18954e-05	0.00507591	1
ENSG00000145730	PAM	AMD_HUMAN	P19021	A_24_P97703	0.648374	9.85045	5.24562	8.21218e-05	0.00508228	1
ENSG00000176641	RNF152	RN152_HUMAN	Q8N8N0	A_32_P4199	0.503093	9.84025	5.24267	8.26021e-05	0.00510397	1
ENSG00000266485	-	-	-	A_24_P256063	0.501428	14.2802	5.24121	8.28418e-05	0.00510397	1
ENSG00000215807	-	-	-	A_24_P256063	0.501428	14.2802	5.24121	8.28418e-05	0.00510397	1
ENSG00000120675	DNAJC15	DJC15_HUMAN	Q9Y5T4	A_23_P117190	0.564964	13.9663	5.24119	8.2845e-05	0.00510397	1
ENSG00000159228	CBR1	CBR1_HUMAN	P16152	A_23_P29046	-0.471088	11.7471	-5.24028	8.29947e-05	0.00510554	1
ENSG00000171345	KRT19	K1C19_HUMAN	P08727	A_23_P66798	0.438772	17.513	5.23684	8.35609e-05	0.00513269	1
ENSG00000171346	KRT15	K1C15_HUMAN	P19012	A_23_P66798	0.438772	17.513	5.23684	8.35609e-05	0.00513269	1
ENSG00000162174	ASRGL1	ASGL1_HUMAN	Q7L266	A_23_P379864	0.428181	10.5121	5.23576	8.37394e-05	0.00513597	1
ENSG00000204252	HLA-DOA	DOA_HUMAN	P06340	A_32_P356316	-0.420297	11.0354	-5.23379	8.40666e-05	0.00514836	1
ENSG00000117152	RGS4	RGS4_HUMAN	P49798	A_23_P200737	0.768618	7.54691	5.22963	8.47618e-05	0.00518321	1
ENSG00000141968	VAV1	VAV_HUMAN	P15498	A_23_P38959	-0.443039	7.48664	-5.22517	8.55146e-05	0.00522147	1
ENSG00000171224	C10orf35	CJ035_HUMAN	Q96D05	A_23_P369328	0.435173	10.869	5.21737	8.68457e-05	0.00529488	1
ENSG00000140939	NOL3	NOL3_HUMAN	O60936	A_23_P206371	0.457178	10.0935	5.21413	8.74049e-05	0.00532108	1
ENSG00000280001	DDX3Y	DDX3Y_HUMAN	O15523	A_24_P130936	-0.445787	8.91216	-5.21131	8.78957e-05	0.00534304	1
ENSG00000067048	DDX3Y	DDX3Y_HUMAN	O15523	A_24_P130936	-0.445787	8.91216	-5.21131	8.78957e-05	0.00534304	1
ENSG00000008294	SPAG9	JIP4_HUMAN	O60271	A_24_P942469	0.417409	9.7694	5.20958	8.81964e-05	0.0053534	1
ENSG00000101935	AMMECR1	AMMR1_HUMAN	Q9Y4X0	A_32_P201773	0.39544	11.2976	5.20688	8.86708e-05	0.00537426	1
ENSG00000138032	PPM1B	PPM1B_HUMAN	O75688	A_23_P209269	-0.443904	11.0579	-5.20491	8.9017e-05	0.0053873	1
ENSG00000160007	GRLF1	-	-	A_23_P39137	-0.454662	7.73909	-5.20067	8.97694e-05	0.00542485	1
ENSG00000106479	ZNF862	ZN862_HUMAN	O60290	A_24_P333421	0.377199	8.08552	5.19658	9.04992e-05	0.00546092	1
ENSG00000153404	PLEKHG4B	PKH4B_HUMAN	Q96PX9	A_23_P81640	-0.57025	7.75069	-5.19456	9.08628e-05	0.00547481	1
ENSG00000188643	S100A16	S10AG_HUMAN	Q96FQ6	A_23_P147918	0.486185	14.0863	5.19349	9.10567e-05	0.00547483	1
ENSG00000227051	C14orf132	CN132_HUMAN	Q9NPU4	A_24_P920447	-0.46633	9.42974	-5.19309	9.11295e-05	0.00547483	1
ENSG00000265649	-	-	-	A_23_P48717	0.510191	15.2763	5.19098	9.15106e-05	0.0054897	1
ENSG00000119655	NPC2	NPC2_HUMAN	P61916	A_23_P48717	0.510191	15.2763	5.19098	9.15106e-05	0.0054897	1
ENSG00000101265	RASSF2	RASF2_HUMAN	P50749	A_23_P166087	-0.450628	9.6231	-5.19016	9.16597e-05	0.0054904	1
ENSG00000170373	CST1	CYTN_HUMAN	P01037	A_23_P112859	1.07575	12.544	5.18945	9.17895e-05	0.0054904	1
ENSG00000134686	PHC2	PHC2_HUMAN	Q8IXK0	A_23_P34510	0.382062	8.05875	5.18485	9.26313e-05	0.0055327	1
ENSG00000116017	ARID3A	ARI3A_HUMAN	Q99856	A_23_P16516	-0.362344	11.93	-5.18198	9.31604e-05	0.00554818	1
ENSG00000230763	HLA-DPB1	DPB1_HUMAN	P04440	A_24_P166443	0.556509	10.7096	5.18051	9.34333e-05	0.00555638	1
ENSG00000237710	HLA-DPB1	DPB1_HUMAN	P04440	A_24_P166443	0.556509	10.7096	5.18051	9.34333e-05	0.00555638	1
ENSG00000230708	-	-	-	A_24_P166443	0.556509	10.7096	5.18051	9.34333e-05	0.00555638	1
ENSG00000226826	HLA-DPB1	DPB1_HUMAN	P04440	A_24_P166443	0.556509	10.7096	5.18051	9.34333e-05	0.00555638	1
ENSG00000223865	HLA-DPB1	DPB1_HUMAN	P04440	A_24_P166443	0.556509	10.7096	5.18051	9.34333e-05	0.00555638	1
ENSG00000215048	HLA-DPB1	DPB1_HUMAN	P04440	A_24_P166443	0.556509	10.7096	5.18051	9.34333e-05	0.00555638	1
ENSG00000229295	-	-	-	A_24_P166443	0.556509	10.7096	5.18051	9.34333e-05	0.00555638	1
ENSG00000236693	HLA-DPB1	DPB1_HUMAN	P04440	A_24_P166443	0.556509	10.7096	5.18051	9.34333e-05	0.00555638	1
ENSG00000126752	SSX1	SSX1_HUMAN	Q16384	A_32_P55135	0.502865	7.38199	5.17809	9.38841e-05	0.00556134	1
ENSG00000134250	NOTCH2	NOTC2_HUMAN	Q04721	A_24_P50057	0.546658	12.1129	5.17714	9.40602e-05	0.00556134	1
ENSG00000136943	CTSV	CATL2_HUMAN	O60911	A_23_P146456	0.454972	15.5862	5.17667	9.41477e-05	0.00556134	1
ENSG00000259330	-	-	-	A_32_P76992	-0.376271	9.95038	-5.17643	9.41935e-05	0.00556134	1
ENSG00000213853	EMP2	EMP2_HUMAN	P54851	A_23_P304682	0.341556	9.05862	5.17565	9.43399e-05	0.00556199	1
ENSG00000108370	RGS9	RGS9_HUMAN	O75916	A_23_P66881	-0.572902	8.22381	-5.17346	9.47507e-05	0.00557821	1
ENSG00000173598	NUDT4	NUDT4_HUMAN	Q9NZJ9	A_24_P335263	0.459724	13.5466	5.1718	9.5063e-05	0.00558195	1
ENSG00000164120	HPGD	PGDH_HUMAN	P15428	A_23_P213050	-0.667709	8.96311	-5.17168	9.5086e-05	0.00558195	1
ENSG00000259974	-	-	-	A_32_P23125	0.392052	12.7485	5.16886	9.56199e-05	0.00560529	1
ENSG00000253276	CCDC71L	CC71L_HUMAN	Q8N9Z2	A_32_P170736	0.551112	9.62223	5.16796	9.57913e-05	0.00560563	1
ENSG00000132824	SERINC3	SERC3_HUMAN	Q13530	A_23_P79836	0.46691	12.2129	5.16727	9.59232e-05	0.00560563	1
ENSG00000162545	CAMK2N1	CK2N1_HUMAN	Q7Z7J9	A_23_P11800	0.48711	8.97177	5.16669	9.60349e-05	0.00560563	1
ENSG00000181751	C5orf30	CE030_HUMAN	Q96GV9	A_23_P122007	0.45019	10.7746	5.16473	9.6409e-05	0.00560777	1
ENSG00000165583	SSX5	SSX5_HUMAN	O60225	A_23_P84359	0.38859	7.64121	5.1638	9.65868e-05	0.00560777	1
ENSG00000173662	TAS1R1	TS1R1_HUMAN	Q7RTX1	A_23_P160886	0.427106	7.79934	5.16281	9.67775e-05	0.00560777	1
ENSG00000147113	CXorf36	DIA1R_HUMAN	Q9H7Y0	A_24_P160225	0.437675	6.93834	5.16181	9.6971e-05	0.00560777	1
ENSG00000047579	DTNBP1	DTBP1_HUMAN	Q96EV8	A_23_P42435	0.409596	11.0962	5.16154	9.70228e-05	0.00560777	1
ENSG00000146592	CREB5	CREB5_HUMAN	Q02930	A_24_P532232	-0.504155	8.11291	-5.16049	9.72247e-05	0.00560777	1
ENSG00000119866	BCL11A	BC11A_HUMAN	Q9H165	A_24_P411186	-0.471865	7.9887	-5.16019	9.72834e-05	0.00560777	1
ENSG00000198003	CCDC151	CC151_HUMAN	A5D8V7	A_23_P326893	-0.400872	8.6556	-5.1601	9.72998e-05	0.00560777	1
ENSG00000144668	ITGA9	ITA9_HUMAN	Q13797	A_24_P607904	0.511206	10.1364	5.15753	9.77981e-05	0.00562859	1
ENSG00000135541	AHI1	AHI1_HUMAN	Q8N157	A_24_P213710	-0.400227	9.65804	-5.15458	9.83736e-05	0.00563357	1
ENSG00000153982	GDPD1	GDPD1_HUMAN	Q8N9F7	A_24_P920730	0.492261	9.01442	5.15443	9.8404e-05	0.00563357	1
ENSG00000075239	ACAT1	THIL_HUMAN	P24752	A_24_P203678	-0.37427	9.03011	-5.15439	9.84109e-05	0.00563357	1
ENSG00000249087	ZNF436-AS1	CA213_HUMAN	Q8NC38	A_23_P362228	0.66001	9.37371	5.15428	9.84329e-05	0.00563357	1
ENSG00000141480	ARRB2	ARRB2_HUMAN	P32121	A_23_P158829	-0.361164	11.2273	-5.14666	9.99366e-05	0.00571168	1
ENSG00000141480	DKFZp686L0365	ARRB2_HUMAN	P32121	A_23_P158829	-0.361164	11.2273	-5.14666	9.99366e-05	0.00571168	1
ENSG00000110108	TMEM109	TM109_HUMAN	Q9BVC6	A_24_P47467	0.405948	11.1372	5.145	0.000100267	0.0057226	1
ENSG00000115318	LOXL3	LOXL3_HUMAN	P58215	A_23_P39799	-0.387803	7.99197	-5.13959	0.000101353	0.00577313	1
ENSG00000137819	PAQR5	MPRG_HUMAN	Q9NXK6	A_23_P163251	0.493641	9.80315	5.13853	0.000101567	0.00577313	1
ENSG00000104722	NEFM	NFM_HUMAN	P07197	A_24_P264832	-0.680993	9.03673	-5.13774	0.000101727	0.00577313	1
ENSG00000077150	NFKB2	NFKB2_HUMAN	Q00653	A_23_P202156	0.354037	8.26801	5.13732	0.000101812	0.00577313	1
ENSG00000178301	AQP11	AQP11_HUMAN	Q8NBQ7	A_23_P417974	0.3438	8.2642	5.1369	0.000101898	0.00577313	1
ENSG00000137193	PIM1	PIM1_HUMAN	P11309	A_23_P345118	-0.556274	11.6095	-5.13642	0.000101995	0.00577313	1
ENSG00000254621	-	-	-	A_24_P796274	-0.372627	10.638	-5.13448	0.000102389	0.00578746	1
ENSG00000170542	SERPINB9	SPB9_HUMAN	P50453	A_23_P30687	-0.689937	11.041	-5.12425	0.000104497	0.00587616	1
ENSG00000117525	F3	TF_HUMAN	P13726	A_23_P126782	0.524684	8.25788	5.12408	0.000104532	0.00587616	1
ENSG00000129521	EGLN3	EGLN3_HUMAN	Q9H6Z9	A_23_P360379	0.419256	9.54349	5.12366	0.000104619	0.00587616	1
ENSG00000058085	LAMC2	LAMC2_HUMAN	Q13753	A_23_P201636	-0.650078	10.1157	-5.1234	0.000104673	0.00587616	1
ENSG00000170412	GPRC5C	GPC5C_HUMAN	Q9NQ84	A_32_P109029	0.686981	10.4341	5.121	0.000105176	0.00589631	1
ENSG00000114450	GNB4	GBB4_HUMAN	Q9HAV0	A_32_P184916	-0.395178	9.13956	-5.12007	0.000105371	0.00589919	1
ENSG00000175445	LPL	LIPL_HUMAN	P06858	A_23_P146233	-0.353705	7.56291	-5.11676	0.000106069	0.00591291	1
ENSG00000280212	-	-	-	A_23_P101121	-0.382402	8.4722	-5.11578	0.000106277	0.00591291	1
ENSG00000167216	KATNAL2	KATL2_HUMAN	Q8IYT4	A_23_P101121	-0.382402	8.4722	-5.11578	0.000106277	0.00591291	1
ENSG00000060982	BCAT1	BCAT1_HUMAN	P54687	A_23_P87528	-0.401143	8.43838	-5.11576	0.000106281	0.00591291	1
ENSG00000180828	BHLHE22	BHE22_HUMAN	Q8NFJ8	A_32_P75581	0.951706	9.4709	5.11547	0.000106343	0.00591291	1
ENSG00000179046	FLJ25801	TRIMM_HUMAN	Q8N7C3	A_23_P350005	-0.696674	11.9624	-5.11474	0.000106496	0.00591291	1
ENSG00000179046	TRIML2	TRIMM_HUMAN	Q8N7C3	A_23_P350005	-0.696674	11.9624	-5.11474	0.000106496	0.00591291	1
ENSG00000172183	ISG20	ISG20_HUMAN	Q96AZ6	A_23_P32404	0.418974	10.1353	5.11406	0.000106641	0.00591291	1
ENSG00000182722	-	-	-	A_24_P118452	-0.478091	10.266	-5.11403	0.000106648	0.00591291	1
ENSG00000105855	ITGB8	ITB8_HUMAN	P26012	A_24_P759477	0.545423	7.7603	5.11347	0.000106767	0.00591291	1
ENSG00000136997	MYC	MYC_HUMAN	P01106	A_23_P215956	-1.00723	11.3994	-5.10922	0.000107675	0.00595514	1
ENSG00000153786	ZDHHC7	ZDHC7_HUMAN	Q9NXF8	A_24_P373297	0.333318	11.9498	5.10623	0.000108319	0.00597519	1
ENSG00000206538	VGLL3	VGLL3_HUMAN	A8MV65	A_23_P132763	-0.393428	7.38868	-5.10547	0.000108483	0.00597519	1
ENSG00000114854	TNNC1	TNNC1_HUMAN	P63316	A_23_P166823	0.792972	12.1872	5.10441	0.000108713	0.00597519	1
ENSG00000185745	IFIT1	IFIT1_HUMAN	P09914	A_23_P52266	-0.554356	8.87508	-5.10409	0.000108782	0.00597519	1
ENSG00000144063	MALL	MALL_HUMAN	Q13021	A_24_P80204	-0.339815	8.15445	-5.10376	0.000108855	0.00597519	1
ENSG00000119688	ABCD4	ABCD4_HUMAN	O14678	A_23_P37327	0.335941	11.3276	5.10183	0.000109275	0.00597519	1
ENSG00000172575	RASGRP1	GRP1_HUMAN	O95267	A_23_P124642	0.508477	8.72617	5.1011	0.000109434	0.00597519	1
ENSG00000266495	-	-	-	A_32_P228570	0.429897	8.5544	5.10097	0.000109461	0.00597519	1
ENSG00000183876	ARSI	ARSI_HUMAN	Q5FYB1	A_23_P19030	0.472671	9.14805	5.10042	0.000109582	0.00597519	1
ENSG00000155886	SLC24A2	NCKX2_HUMAN	Q9UI40	A_32_P154941	0.412646	7.67695	5.10017	0.000109637	0.00597519	1
ENSG00000105278	ZFR2	ZFR2_HUMAN	Q9UPR6	A_32_P55462	-0.555153	13.6103	-5.09709	0.000110314	0.00600192	1
ENSG00000188783	PRELP	PRELP_HUMAN	P51888	A_23_P51499	0.350846	7.34567	5.09661	0.000110419	0.00600192	1
ENSG00000154124	OTULIN	OTUL_HUMAN	Q96BN8	A_24_P414446	0.339028	8.32501	5.09512	0.000110748	0.00601185	1
ENSG00000107742	SPOCK2	TICN2_HUMAN	Q92563	A_23_P161280	-0.467953	9.19139	-5.09428	0.000110933	0.00601393	1
ENSG00000243660	ZNF487	ZN487_HUMAN	B1APH4	A_24_P633543	0.367063	7.67422	5.09312	0.000111191	0.00601996	1
ENSG00000072210	ALDH3A2	AL3A2_HUMAN	P51648	A_23_P129896	-0.834602	10.0057	-5.09217	0.000111402	0.00602349	1
ENSG00000138757	G3BP2	G3BP2_HUMAN	Q9UN86	A_23_P41255	-0.395836	10.1903	-5.08874	0.000112166	0.00605684	1
ENSG00000197594	ENPP1	ENPP1_HUMAN	P22413	A_32_P192376	-0.418423	9.30848	-5.08783	0.000112372	0.00605995	1
ENSG00000174721	FGFBP3	FGFP3_HUMAN	Q8TAT2	A_23_P417994	-0.76509	11.3216	-5.08281	0.000113503	0.00611295	1
ENSG00000269713	NBPF9	-	-	A_32_P149492	0.323937	8.93894	5.07986	0.000114173	0.00614101	1
ENSG00000268043	NBPF12	-	-	A_32_P149492	0.323937	8.93894	5.07986	0.000114173	0.00614101	1
ENSG00000263956	NBPF11	NBPFB_HUMAN	Q86T75	A_32_P149492	0.323937	8.93894	5.07986	0.000114173	0.00614101	1
ENSG00000162825	NBPF8	-	-	A_32_P149492	0.323937	8.93894	5.07986	0.000114173	0.00614101	1
ENSG00000272150	-	-	-	A_32_P149492	0.323937	8.93894	5.07986	0.000114173	0.00614101	1
ENSG00000266338	NBPF15	NBPFF_HUMAN	Q8N660	A_32_P149492	0.323937	8.93894	5.07986	0.000114173	0.00614101	1
ENSG00000271383	NBPF14	-	-	A_32_P149492	0.323937	8.93894	5.07986	0.000114173	0.00614101	1
ENSG00000273136	NBPF26	-	-	A_32_P149492	0.323937	8.93894	5.07986	0.000114173	0.00614101	1
ENSG00000064309	CDON	CDON_HUMAN	Q4KMG0	A_32_P172141	-0.450706	8.28314	-5.07852	0.000114481	0.00614222	1
ENSG00000128951	DUT	DUT_HUMAN	P33316	A_23_P88484	-0.365831	13.7827	-5.07713	0.000114799	0.00615048	1
ENSG00000079102	RUNX1T1	MTG8_HUMAN	Q06455	A_23_P216307	-0.620759	10.4012	-5.07565	0.00011514	0.00615715	1
ENSG00000198162	MAN1A2	MA1A2_HUMAN	O60476	A_32_P88598	0.454482	11.6327	5.07528	0.000115223	0.00615715	1
ENSG00000188010	MORN2	MORN2_HUMAN	Q502X0	A_32_P69465	0.396083	10.5688	5.0729	0.000115773	0.00617853	1
ENSG00000230578	-	-	-	A_23_P217546	0.334754	10.0674	5.06745	0.000117041	0.00623811	1
ENSG00000185973	TMLHE	TMLH_HUMAN	Q9NVH6	A_23_P217546	0.334754	10.0674	5.06745	0.000117041	0.00623811	1
ENSG00000105281	SLC1A5	AAAT_HUMAN	Q15758	A_23_P55998	-0.523812	10.3123	-5.06474	0.000117677	0.00626387	1
ENSG00000100558	PLEK2	PLEK2_HUMAN	Q9NYT0	A_23_P151506	0.33875	8.63538	5.06282	0.000118129	0.0062798	1
ENSG00000065534	MYLK	MYLK_HUMAN	Q15746	A_24_P319923	-0.450707	8.27211	-5.05911	0.00011901	0.00631844	1
ENSG00000166526	ZNF3	ZNF3_HUMAN	P17036	A_23_P219084	-0.434704	10.3674	-5.05772	0.000119341	0.00632786	1
ENSG00000132297	HHLA1	HHLA1_HUMAN	C9JL84	A_23_P157556	-0.448977	7.77747	-5.05703	0.000119507	0.00632846	1
ENSG00000003402	CFLAR	CFLAR_HUMAN	O15519	A_23_P209394	0.417876	10.7219	5.0524	0.000120617	0.00637904	1
ENSG00000165091	TMC1	TMC1_HUMAN	Q8TDI8	A_23_P322735	-0.518305	7.00771	-5.04944	0.000121335	0.00639355	1
ENSG00000106211	HSPB1	HSPB1_HUMAN	P04792	A_24_P86537	0.453036	14.6706	5.04934	0.000121358	0.00639355	1
ENSG00000236060	-	-	-	A_24_P86537	0.453036	14.6706	5.04934	0.000121358	0.00639355	1
ENSG00000113719	ERGIC1	ERGI1_HUMAN	Q969X5	A_24_P97770	0.381885	8.09265	5.04533	0.000122338	0.00643692	1
ENSG00000085063	CD59	CD59_HUMAN	P13987	A_23_P75523	0.362184	11.0405	5.03495	0.000124907	0.00654695	1
ENSG00000254788	CKLF	-	-	A_23_P118061	0.450909	10.3023	5.03375	0.000125207	0.00655431	1
ENSG00000254788	CKLF-CMTM1	-	-	A_23_P118061	0.450909	10.3023	5.03375	0.000125207	0.00655431	1
ENSG00000217555	CKLF	-	-	A_23_P118061	0.450909	10.3023	5.03375	0.000125207	0.00655431	1
ENSG00000124191	TOX2	TOX2_HUMAN	Q96NM4	A_23_P154566	-0.614241	10.3207	-5.03307	0.000125378	0.00655489	1
ENSG00000005810	MYCBP2	MYCB2_HUMAN	O75592	A_23_P151459	-0.408631	10.3591	-5.03025	0.000126088	0.00658162	1
ENSG00000142552	RCN3	RCN3_HUMAN	Q96D15	A_23_P67339	-0.421404	8.06196	-5.02977	0.000126209	0.00658162	1
ENSG00000204352	C9orf129	CI129_HUMAN	Q5T035	A_32_P48949	-0.56168	8.54433	-5.02521	0.000127368	0.00663361	1
ENSG00000259384	GH1	SOMA_HUMAN	P01241	A_23_P207194	-0.653912	8.05079	-5.02429	0.000127604	0.00663749	1
ENSG00000116962	NID1	NID1_HUMAN	P14543	A_23_P200928	-0.340364	7.64886	-5.02145	0.00012833	0.00665365	1
ENSG00000105519	CAPS	CAYP1_HUMAN	Q13938	A_23_P78958	0.365328	8.19113	5.02138	0.00012835	0.00665365	1
ENSG00000213123	TCTEX1D2	TC1D2_HUMAN	Q8WW35	A_23_P21162	0.477901	10.6378	5.02032	0.000128622	0.00665365	1
ENSG00000165752	STK32C	ST32C_HUMAN	Q86UX6	A_24_P64329	-0.391091	8.43946	-5.01946	0.000128844	0.00665365	1
ENSG00000136770	DNAJC1	DNJC1_HUMAN	Q96KC8	A_23_P127128	0.385265	11.7733	5.01868	0.000129046	0.00665365	1
ENSG00000106852	LHX6	LHX6_HUMAN	Q9UPM6	A_23_P32175	-0.451224	7.65886	-5.01837	0.000129126	0.00665365	1
ENSG00000143153	ATP1B1	AT1B1_HUMAN	P05026	A_23_P62932	-0.45716	13.1853	-5.01805	0.00012921	0.00665365	1
ENSG00000197461	PDGFA	PDGFA_HUMAN	P04085	A_23_P113701	-0.515415	8.25967	-5.0158	0.000129793	0.00667535	1
ENSG00000271810	-	-	-	A_23_P406424	0.361464	12.8849	5.01496	0.000130012	0.00667822	1
ENSG00000155366	RHOC	RHOC_HUMAN	P08134	A_23_P406424	0.361464	12.8849	5.01496	0.000130012	0.00667822	1
ENSG00000153012	LGI2	LGI2_HUMAN	Q8N0V4	A_23_P7194	0.49946	10.7529	5.01237	0.000130689	0.00670462	1
ENSG00000215819	-	-	-	A_24_P383660	0.551203	13.5118	5.0106	0.000131153	0.00671586	1
ENSG00000085552	IGSF9	TUTLA_HUMAN	Q9P2J2	A_23_P85441	-0.367779	10.7482	-5.01029	0.000131235	0.00671586	1
ENSG00000136114	THSD1	THSD1_HUMAN	Q9NS62	A_23_P14184	0.539736	10.6151	5.00687	0.000132139	0.00675373	1
ENSG00000243406	-	-	-	A_23_P14184	0.539736	10.6151	5.00687	0.000132139	0.00675373	1
ENSG00000217576	-	-	-	A_23_P14184	0.539736	10.6151	5.00687	0.000132139	0.00675373	1
ENSG00000167614	TTYH1	TTYH1_HUMAN	Q9H313	A_23_P50817	-0.394254	7.8211	-5.00584	0.000132413	0.00675931	1
ENSG00000275650	TTYH1	TTYH1_HUMAN	Q9H313	A_23_P50817	-0.394254	7.8211	-5.00584	0.000132413	0.00675931	1
ENSG00000276887	TTYH1	TTYH1_HUMAN	Q9H313	A_23_P50817	-0.394254	7.8211	-5.00584	0.000132413	0.00675931	1
ENSG00000276537	TTYH1	TTYH1_HUMAN	Q9H313	A_23_P50817	-0.394254	7.8211	-5.00584	0.000132413	0.00675931	1
ENSG00000038382	TRIO	TRIO_HUMAN	O75962	A_23_P425880	-0.442835	9.83228	-5.00229	0.000133358	0.00678027	1
ENSG00000186051	TAL2	TAL2_HUMAN	Q16559	A_23_P409449	0.364554	7.60713	5.00133	0.000133616	0.00678027	1
ENSG00000258783	-	-	-	A_24_P375360	0.5406	12.341	5.00085	0.000133745	0.00678027	1
ENSG00000171604	CXXC5	CXXC5_HUMAN	Q7LFL8	A_23_P399001	-0.62352	12.297	-5.00056	0.000133823	0.00678027	1
ENSG00000173166	RAPH1	RAPH1_HUMAN	Q70E73	A_24_P929570	-0.601269	9.4993	-5.00044	0.000133855	0.00678027	1
ENSG00000001626	CFTR	CFTR_HUMAN	P13569	A_23_P215720	0.403533	7.55305	4.99983	0.000134019	0.00678027	1
ENSG00000117616	RSRP1	RSRP1_HUMAN	Q9BUV0	A_24_P2584	0.585709	9.69863	4.9997	0.000134055	0.00678027	1
ENSG00000177614	PGBD5	PGBD5_HUMAN	Q8N414	A_23_P126649	-0.366808	7.66365	-4.99937	0.000134144	0.00678027	1
ENSG00000131378	RFTN1	RFTN1_HUMAN	Q14699	A_23_P315571	-0.733258	8.54127	-4.99729	0.000134705	0.00680029	1
ENSG00000187098	MITF	MITF_HUMAN	O75030	A_23_P61945	0.533874	8.87045	4.99551	0.000135186	0.00681621	1
ENSG00000187098	MITF-C	MITF_HUMAN	O75030	A_23_P61945	0.533874	8.87045	4.99551	0.000135186	0.00681621	1
ENSG00000111057	KRT18	K1C18_HUMAN	P05783	A_23_P99320	0.436951	15.5356	4.99419	0.000135545	0.0068259	1
ENSG00000247134	-	-	-	A_32_P121549	-0.388449	10.4468	-4.99319	0.000135818	0.00683044	1
ENSG00000261356	-	-	-	A_24_P316059	-0.451608	8.9621	-4.99193	0.00013616	0.00683044	1
ENSG00000134873	CLDN10	CLD10_HUMAN	P78369	A_23_P48350	-0.490459	9.34658	-4.99183	0.000136189	0.00683044	1
ENSG00000105926	MPP6	MPP6_HUMAN	Q9NZW5	A_32_P137336	-0.474032	8.96658	-4.99143	0.0001363	0.00683044	1
ENSG00000058091	CDK14	CDK14_HUMAN	O94921	A_24_P29733	-0.443429	8.45775	-4.98891	0.000136991	0.00685671	1
ENSG00000227869	-	-	-	A_32_P61679	0.442063	8.9654	4.98642	0.000137676	0.00688261	1
ENSG00000175029	CTBP2	CTBP2_HUMAN	P56545	A_24_P103922	-0.625237	11.0326	-4.98548	0.000137936	0.00688722	1
ENSG00000132274	TRIM22	TRI22_HUMAN	Q8IYM9	A_24_P172481	-0.65144	8.52241	-4.98201	0.000138902	0.00692661	1
ENSG00000065675	PRKCQ	KPCT_HUMAN	Q04759	A_23_P1374	0.368633	9.37027	4.98144	0.000139061	0.00692661	1
ENSG00000047346	FAM214A	F214A_HUMAN	Q32MH5	A_23_P99853	0.438148	10.8671	4.97944	0.000139622	0.00693931	1
ENSG00000042317	SPATA7	SPAT7_HUMAN	Q9P0W8	A_32_P34387	0.495129	8.94272	4.97932	0.000139654	0.00693931	1
ENSG00000250363	-	-	-	A_24_P24645	0.542078	13.3163	4.97543	0.000140751	0.00698515	1
ENSG00000138738	PRDM5	PRDM5_HUMAN	Q9NQX1	A_23_P362759	-0.46408	8.29366	-4.97484	0.000140917	0.00698515	1
ENSG00000152193	RNF219	RN219_HUMAN	Q5W0B1	A_23_P25638	0.424603	10.2666	4.97352	0.000141292	0.00699533	1
ENSG00000136488	CSH1	CSH1_HUMAN	P0DML2	A_23_P207154	-0.606718	7.78313	-4.97126	0.000141934	0.00701866	1
ENSG00000213218	CSH1	CSH2_HUMAN	P0DML3	A_23_P207154	-0.606718	7.78313	-4.97126	0.000141934	0.00701866	1
ENSG00000213218	CSH2	CSH2_HUMAN	P0DML3	A_23_P207154	-0.606718	7.78313	-4.97126	0.000141934	0.00701866	1
ENSG00000206159	-	-	-	A_32_P111701	0.457716	9.96337	4.96789	0.0001429	0.00705792	1
ENSG00000250448	-	-	-	A_32_P204950	0.372904	8.00888	4.96623	0.000143376	0.00707295	1
ENSG00000233834	-	-	-	A_32_P139391	-0.511534	7.95033	-4.96563	0.000143551	0.00707307	1
ENSG00000136098	NEK3	NEK3_HUMAN	P51956	A_23_P76718	0.517426	10.9823	4.96413	0.000143986	0.00708599	1
ENSG00000156049	GNA14	GNA14_HUMAN	O95837	A_24_P415150	-0.650988	8.06823	-4.96258	0.000144434	0.00709953	1
ENSG00000100078	PLA2G3	PA2G3_HUMAN	Q9NZ20	A_23_P17821	-0.342706	7.64784	-4.96188	0.000144638	0.0071011	1
ENSG00000106333	PCOLCE	PCOC1_HUMAN	Q15113	A_23_P251499	-0.342154	9.44859	-4.95947	0.000145341	0.00711907	1
ENSG00000119335	SET	SET_HUMAN	Q01105	A_23_P217015	-0.356965	11.0833	-4.95944	0.000145351	0.00711907	1
ENSG00000081803	CADPS2	CAPS2_HUMAN	Q86UW7	A_24_P246710	-0.455185	7.85793	-4.95798	0.000145776	0.00713141	1
ENSG00000122644	ARL4A	ARL4A_HUMAN	P40617	A_23_P145761	-0.48671	9.54512	-4.95642	0.000146234	0.00714529	1
ENSG00000101460	MAP1LC3A	MLP3A_HUMAN	Q9H492	A_23_P154786	0.367729	9.54366	4.95343	0.000147118	0.00717995	1
ENSG00000108950	FAM20A	FA20A_HUMAN	Q96MK3	A_32_P108254	0.418602	11.7546	4.95068	0.000147934	0.0072112	1
ENSG00000108950	FP2747	FA20A_HUMAN	Q96MK3	A_32_P108254	0.418602	11.7546	4.95068	0.000147934	0.0072112	1
ENSG00000207846	-	-	-	A_24_P230057	0.46743	13.7087	4.94932	0.000148339	0.00721534	1
ENSG00000214720	-	-	-	A_24_P230057	0.46743	13.7087	4.94932	0.000148339	0.00721534	1
ENSG00000145349	CAMK2D	KCC2D_HUMAN	Q13557	A_24_P106166	0.41259	9.59592	4.94922	0.00014837	0.00721534	1
ENSG00000180628	PCGF5	PCGF5_HUMAN	Q86SE9	A_24_P880043	0.387515	7.31786	4.94788	0.000148771	0.0072263	1
ENSG00000167601	AXL	UFO_HUMAN	P30530	A_23_P208389	-0.446252	9.70673	-4.94416	0.000149889	0.00727201	1
ENSG00000076770	MBNL3	MBNL3_HUMAN	Q9NUK0	A_32_P165297	0.36947	7.90322	4.94102	0.000150839	0.00730948	1
ENSG00000250361	GYPB	GLPB_HUMAN	P06028	A_23_P212854	0.317715	7.36564	4.93764	0.00015187	0.00735078	1
ENSG00000215149	-	-	-	A_24_P230466	0.50417	13.7854	4.93254	0.000153437	0.00740045	1
ENSG00000232389	-	-	-	A_32_P50452	-0.637308	10.6878	-4.9324	0.000153481	0.00740045	1
ENSG00000102172	SMS	SPSY_HUMAN	P52788	A_32_P50452	-0.637308	10.6878	-4.9324	0.000153481	0.00740045	1
ENSG00000164076	CAMKV	CAMKV_HUMAN	Q8NCB2	A_23_P29680	-0.522405	8.34082	-4.93196	0.000153617	0.00740045	1
ENSG00000110092	CCND1	CCND1_HUMAN	P24385	A_23_P202837	-0.422107	8.97209	-4.93136	0.000153802	0.00740067	1
ENSG00000164692	COL1A2	CO1A2_HUMAN	P08123	A_24_P277934	-0.41917	9.62559	-4.92652	0.000155311	0.00746016	1
ENSG00000182050	MGAT4C	MGT4C_HUMAN	Q9UBM8	A_23_P10062	-0.747231	7.98809	-4.92623	0.000155401	0.00746016	1
ENSG00000103671	TRIP4	TRIP4_HUMAN	Q15650	A_23_P152028	0.317255	11.2111	4.92319	0.000156356	0.00748784	1
ENSG00000197429	IPP	IPP_HUMAN	Q9Y573	A_23_P9662	0.318617	9.49264	4.92267	0.00015652	0.00748784	1
ENSG00000147889	CDKN2A	CD2A1_HUMAN	P42771	A_23_P43484	0.32992	7.66883	4.92231	0.000156635	0.00748784	1
ENSG00000147889	CDKN2A	CD2A2_HUMAN	Q8N726	A_23_P43484	0.32992	7.66883	4.92231	0.000156635	0.00748784	1
ENSG00000130545	CRB3	CRUM3_HUMAN	Q9BUF7	A_24_P108517	0.440352	9.92645	4.9217	0.000156825	0.00748784	1
ENSG00000116120	FARSB	SYFB_HUMAN	Q9NSD9	A_23_P165346	-0.400825	12.7453	-4.9215	0.000156889	0.00748784	1
ENSG00000020577	SAMD4A	SMAG1_HUMAN	Q9UPU9	A_23_P335661	-0.650625	8.50537	-4.92044	0.000157227	0.00749344	1
ENSG00000180304	OAZ2	OAZ2_HUMAN	O95190	A_23_P106463	-0.402057	12.4564	-4.91998	0.000157371	0.00749344	1
ENSG00000228606	-	-	-	A_24_P886960	0.425651	8.40493	4.9179	0.000158031	0.00750813	1
ENSG00000169213	RAB3B	RAB3B_HUMAN	P20337	A_24_P933319	0.374453	12.4364	4.91739	0.000158196	0.00750813	1
ENSG00000138161	CUZD1	CUZD1_HUMAN	Q86UP6	A_23_P47058	-0.534078	7.58011	-4.91729	0.000158228	0.00750813	1
ENSG00000112218	GPR63	GPR63_HUMAN	Q9BZJ6	A_23_P214727	-0.357898	7.4184	-4.91578	0.00015871	0.00751636	1
ENSG00000061337	LZTS1	LZTS1_HUMAN	Q9Y250	A_23_P20443	-0.519272	10.8752	-4.91542	0.000158824	0.00751636	1
ENSG00000213777	-	-	-	A_24_P202637	0.383274	7.73589	4.91418	0.000159222	0.00751636	1
ENSG00000196417	ZNF765	ZN765_HUMAN	Q7L2R6	A_24_P202637	0.383274	7.73589	4.91418	0.000159222	0.00751636	1
ENSG00000233369	-	-	-	A_24_P95007	-0.32644	11.9436	-4.91403	0.000159272	0.00751636	1
ENSG00000277053	-	-	-	A_24_P95007	-0.32644	11.9436	-4.91403	0.000159272	0.00751636	1
ENSG00000263001	GTF2I	GTF2I_HUMAN	P78347	A_24_P95007	-0.32644	11.9436	-4.91403	0.000159272	0.00751636	1
ENSG00000065357	DGKA	DGKA_HUMAN	P23743	A_23_P105307	-0.381842	8.67052	-4.91389	0.000159315	0.00751636	1
ENSG00000253219	-	-	-	A_24_P264644	0.505496	13.5662	4.91008	0.000160545	0.00756395	1
ENSG00000104447	TRPS1	TRPS1_HUMAN	Q9UHF7	A_23_P134755	0.298328	7.55032	4.90962	0.000160692	0.00756395	1
ENSG00000105926	MPP6	MPP6_HUMAN	Q9NZW5	A_23_P71053	-0.536031	10.1483	-4.90786	0.000161267	0.0075823	1
ENSG00000117834	SLC5A9	SC5A9_HUMAN	Q2M3M2	A_24_P242581	0.669595	9.78105	4.90584	0.000161924	0.00760451	1
ENSG00000144642	RBMS3	RBMS3_HUMAN	Q6XE24	A_32_P74477	-0.454928	7.66487	-4.90338	0.000162728	0.00763356	1
ENSG00000124570	SERPINB6	SPB6_HUMAN	P35237	A_23_P70355	0.405995	10.4666	4.90182	0.000163241	0.00764888	1
ENSG00000102996	MMP15	MMP15_HUMAN	P51511	A_24_P116535	0.44564	12.02	4.89906	0.000164156	0.00766551	1
ENSG00000089327	FXYD5	FXYD5_HUMAN	Q96DB9	A_24_P194081	-0.35491	9.81162	-4.89765	0.000164623	0.00766666	1
ENSG00000166736	HTR3A	5HT3A_HUMAN	P46098	A_23_P98399	-0.386522	7.75158	-4.8973	0.00016474	0.00766666	1
ENSG00000116774	OLFML3	OLFL3_HUMAN	Q9NRN5	A_24_P11315	-0.62772	8.91791	-4.89302	0.000166167	0.00772434	1
ENSG00000163349	HIPK1	HIPK1_HUMAN	Q86Z02	A_24_P11315	-0.62772	8.91791	-4.89302	0.000166167	0.00772434	1
ENSG00000151835	SACS	SACS_HUMAN	Q9NZJ4	A_23_P128663	-0.492444	10.4529	-4.89225	0.000166427	0.00772767	1
ENSG00000108018	SORCS1	SORC1_HUMAN	Q8WY21	A_23_P352932	0.515269	10.8275	4.89119	0.000166784	0.00773549	1
ENSG00000205336	GPR56	GPR56_HUMAN	Q9Y653	A_23_P206280	-0.40462	7.87348	-4.88885	0.000167573	0.00774579	1
ENSG00000125166	GOT2	AATM_HUMAN	P00505	A_23_P106575	-0.364762	11.9679	-4.88868	0.000167632	0.00774579	1
ENSG00000112715	VEGFA	VEGFA_HUMAN	P15692	A_23_P81805	0.375336	8.52029	4.8883	0.00016776	0.00774579	1
ENSG00000088340	-	-	-	A_24_P23454	0.374947	7.02564	4.88699	0.000168206	0.00775766	1
ENSG00000185070	FLRT2	FLRT2_HUMAN	O43155	A_23_P99802	0.524138	10.6087	4.88403	0.000169213	0.00778662	1
ENSG00000189410	SH2D5	SH2D5_HUMAN	Q6ZV89	A_24_P686965	-0.530073	10.7394	-4.88172	0.000170003	0.00781241	1
ENSG00000175077	RTP1	RTP1_HUMAN	P59025	A_32_P528967	-0.617374	8.30123	-4.88074	0.00017034	0.00781241	1
ENSG00000180730	SHISA2	SHSA2_HUMAN	Q6UWI4	A_32_P55241	0.539669	11.703	4.88073	0.000170343	0.00781241	1
ENSG00000173013	CCDC96	CCD96_HUMAN	Q2M329	A_32_P69930	0.386345	9.34388	4.87977	0.000170675	0.0078189	1
ENSG00000204054	-	-	-	A_24_P826046	0.334051	7.72058	4.87447	0.000172515	0.00789039	1
ENSG00000149150	SLC43A1	LAT3_HUMAN	O75387	A_23_P52939	-0.503152	9.14634	-4.87417	0.00017262	0.00789039	1
ENSG00000235275	-	-	-	A_24_P247233	0.49813	13.5252	4.8732	0.000172957	0.00789704	1
ENSG00000165861	ZFYVE1	ZFYV1_HUMAN	Q9HBF4	A_24_P287503	0.362677	9.80151	4.87221	0.000173304	0.00789866	1
ENSG00000259229	-	-	-	A_24_P287503	0.362677	9.80151	4.87221	0.000173304	0.00789866	1
ENSG00000235649	-	-	-	A_23_P258136	-0.435974	9.76214	-4.872	0.000173377	0.00789866	1
ENSG00000101825	MXRA5	MXRA5_HUMAN	Q9NR99	A_23_P258136	-0.435974	9.76214	-4.872	0.000173377	0.00789866	1
ENSG00000129538	RNASE1	RNAS1_HUMAN	P07998	A_24_P403959	0.581536	8.04011	4.86865	0.000174554	0.00794347	1
ENSG00000101198	NKAIN4	NKAI4_HUMAN	Q8IVV8	A_23_P17316	-0.347242	7.63752	-4.86626	0.000175401	0.00796664	1
ENSG00000187514	PTMA	PTMA_HUMAN	P06454	A_24_P264207	-0.510979	16.4606	-4.86612	0.000175451	0.00796664	1
ENSG00000198134	-	-	-	A_24_P264207	-0.510979	16.4606	-4.86612	0.000175451	0.00796664	1
ENSG00000231503	-	-	-	A_24_P264207	-0.510979	16.4606	-4.86612	0.000175451	0.00796664	1
ENSG00000070756	PABPC1	PABP1_HUMAN	P11940	A_32_P152673	-0.451159	15.8669	-4.86413	0.000176159	0.00798994	1
ENSG00000230673	-	-	-	A_32_P152673	-0.451159	15.8669	-4.86413	0.000176159	0.00798994	1
ENSG00000131263	RLIM	RNF12_HUMAN	Q9NVW2	A_32_P152673	-0.451159	15.8669	-4.86413	0.000176159	0.00798994	1
ENSG00000244067	GSTA2	GSTA2_HUMAN	P09210	A_24_P300394	0.428491	8.80201	4.859	0.000177994	0.00806428	1
ENSG00000120594	PLXDC2	PXDC2_HUMAN	Q6UX71	A_23_P161424	-0.450345	9.33625	-4.85742	0.000178565	0.00808123	1
ENSG00000160712	IL6R	IL6RA_HUMAN	P08887	A_24_P379413	-0.458643	7.5933	-4.85593	0.000179103	0.00809388	1
ENSG00000166483	WEE1	WEE1_HUMAN	P30291	A_23_P127926	-0.480535	10.4172	-4.85556	0.000179238	0.00809388	1
ENSG00000035664	DAPK2	-	-	A_24_P10233	-0.389278	7.77332	-4.85371	0.000179911	0.00811536	1
ENSG00000165246	NLGN4Y	NLGNY_HUMAN	Q8NFZ3	A_23_P121441	-0.401546	9.60935	-4.84742	0.000182216	0.00821033	1
ENSG00000165806	CASP7	CASP7_HUMAN	P55210	A_23_P12572	0.534776	9.31654	4.84625	0.000182648	0.00822078	1
ENSG00000142405	NLRP12	NAL12_HUMAN	P59046	A_23_P101434	-0.603193	9.03107	-4.8451	0.000183074	0.00822605	1
ENSG00000059377	TBXAS1	THAS_HUMAN	P24557	A_32_P212886	0.406886	9.32101	4.8444	0.000183332	0.00822605	1
ENSG00000110841	PPFIBP1	LIPB1_HUMAN	Q86W92	A_23_P373724	0.374008	11.1517	4.84417	0.000183417	0.00822605	1
ENSG00000168610	STAT3	STAT3_HUMAN	P40763	A_23_P107206	-0.353552	8.25457	-4.84377	0.000183566	0.00822605	1
ENSG00000177119	ANO6	ANO6_HUMAN	Q4KMQ2	A_23_P389118	0.401006	11.1815	4.84139	0.000184453	0.00825678	1
ENSG00000002586	CD99	CD99_HUMAN	P14209	A_23_P217510	0.349592	15.3361	4.8394	0.000185199	0.00828114	1
ENSG00000186907	RTN4RL2	R4RL2_HUMAN	Q86UN3	A_23_P139104	-0.403647	9.76327	-4.83841	0.00018557	0.00828873	1
ENSG00000100580	TMED8	TMED8_HUMAN	Q6PL24	A_32_P213692	0.33864	10.8485	4.83649	0.000186294	0.00831201	1
ENSG00000213047	DENND1B	DEN1B_HUMAN	Q6P3S1	A_32_P204330	0.313981	8.60653	4.83487	0.000186905	0.0083212	1
ENSG00000197930	ERO1L	ERO1A_HUMAN	Q96HE7	A_23_P106145	0.52775	10.6072	4.83268	0.000187737	0.00834921	1
ENSG00000230615	-	-	-	A_24_P510377	0.344811	7.61414	4.83176	0.000188086	0.0083496	1
ENSG00000203668	CHML	RAE2_HUMAN	P26374	A_23_P46118	-0.559926	8.88179	-4.83158	0.000188152	0.0083496	1
ENSG00000157600	RP13-360B22.2	TM164_HUMAN	Q5U3C3	A_23_P125726	0.386689	10.5438	4.82856	0.000189309	0.00838787	1
ENSG00000157600	TMEM164	TM164_HUMAN	Q5U3C3	A_23_P125726	0.386689	10.5438	4.82856	0.000189309	0.00838787	1
ENSG00000144820	GPR128	GP128_HUMAN	Q96K78	A_23_P40919	0.414173	7.61805	4.82826	0.000189423	0.00838787	1
ENSG00000104219	ZDHHC2	ZDHC2_HUMAN	Q9UIJ5	A_23_P9086	0.398784	10.1553	4.8252	0.000190601	0.0084219	1
ENSG00000204103	MAFB	MAFB_HUMAN	Q9Y5Q3	A_23_P17345	0.487673	8.12064	4.82365	0.000191201	0.00843087	1
ENSG00000261652	C15orf65	CO065_HUMAN	H3BRN8	A_32_P447001	0.530867	8.95636	4.82362	0.000191214	0.00843087	1
ENSG00000129514	FOXA1	FOXA1_HUMAN	P55317	A_23_P37127	0.864261	9.33104	4.82227	0.000191736	0.00844483	1
ENSG00000183741	CBX6	CBX6_HUMAN	O95503	A_24_P370372	0.529311	10.3102	4.82122	0.000192144	0.00845371	1
ENSG00000119912	IDE	IDE_HUMAN	P14735	A_32_P19466	-0.334921	7.61022	-4.8204	0.000192467	0.00845886	1
ENSG00000137198	GMPR	GMPR1_HUMAN	P36959	A_24_P277657	0.610236	9.61438	4.81847	0.00019322	0.00846481	1
ENSG00000133980	VRTN	VRTN_HUMAN	Q9H8Y1	A_23_P140362	-0.421441	12.9854	-4.81846	0.000193225	0.00846481	1
ENSG00000197959	DNM3	DYN3_HUMAN	Q9UQ16	A_23_P371266	-0.371149	7.97089	-4.81824	0.00019331	0.00846481	1
ENSG00000269378	-	-	-	A_23_P104193	-0.424759	12.3064	-4.81794	0.000193426	0.00846481	1
ENSG00000150093	ITGB1	ITB1_HUMAN	P05556	A_23_P104193	-0.424759	12.3064	-4.81794	0.000193426	0.00846481	1
ENSG00000124570	SERPINB6	SPB6_HUMAN	P35237	A_24_P838743	0.325309	10.0718	4.81653	0.000193979	0.00847998	1
ENSG00000090686	USP48	UBP48_HUMAN	Q86UV5	A_24_P393285	-0.426024	9.12216	-4.81533	0.000194454	0.00849169	1
ENSG00000223865	HLA-DPB1	DPB1_HUMAN	P04440	A_23_P258769	0.539972	9.69251	4.80993	0.000196595	0.00857609	1
ENSG00000149591	TAGLN	TAGL_HUMAN	Q01995	A_23_P87013	0.446773	14.7158	4.80594	0.000198193	0.00863662	1
ENSG00000169851	PCDH7	PCDH7_HUMAN	O60245	A_23_P310921	0.474351	10.4693	4.80438	0.000198819	0.0086459	1
ENSG00000116663	FBXO6	FBX6_HUMAN	Q9NRD1	A_23_P97064	0.389142	8.12085	4.80436	0.000198827	0.0086459	1
ENSG00000077152	UBE2T	UBE2T_HUMAN	Q9NPD8	A_23_P115482	0.32944	13.1912	4.80267	0.000199512	0.00864929	1
ENSG00000106804	C5	CO5_HUMAN	P01031	A_23_P71855	0.604521	9.45439	4.80261	0.000199536	0.00864929	1
ENSG00000100393	EP300	EP300_HUMAN	Q09472	A_23_P40693	-0.397961	9.55215	-4.80106	0.000200163	0.00866732	1
ENSG00000115459	ELMOD3	ELMD3_HUMAN	Q96FG2	A_23_P154256	0.337715	9.1761	4.7998	0.000200677	0.00868046	1
ENSG00000173262	SLC2A14	GTR14_HUMAN	Q8TDB8	A_32_P47754	0.35209	15.6186	4.79763	0.000201562	0.00869662	1
ENSG00000111897	SERINC1	SERC1_HUMAN	Q9NRX5	A_24_P129232	0.399313	11.4569	4.7965	0.000202026	0.00870216	1
ENSG00000251566	-	-	-	A_32_P208978	-0.45504	14.394	-4.7951	0.0002026	0.00871775	1
ENSG00000250802	-	-	-	A_32_P208978	-0.45504	14.394	-4.7951	0.0002026	0.00871775	1
ENSG00000104953	TLE6	TLE6_HUMAN	Q9H808	A_23_P426501	0.312175	8.44488	4.79092	0.000204324	0.00877354	1
ENSG00000174574	AKIRIN1	AKIR1_HUMAN	Q9H9L7	A_23_P256142	-0.390354	9.94393	-4.78906	0.000205099	0.00879764	1
ENSG00000152284	TCF7L1	TF7L1_HUMAN	Q9HCS4	A_23_P142872	-0.644301	12.1645	-4.78543	0.000206615	0.00884418	1
ENSG00000100422	CERK	CERK1_HUMAN	Q8TCT0	A_24_P62237	-0.38442	10.8607	-4.78322	0.000207545	0.00886498	1
ENSG00000137210	TMEM14B	TM14B_HUMAN	Q9NUH8	A_24_P29445	0.43381	13.5767	4.78285	0.000207703	0.00886498	1
ENSG00000242779	-	-	-	A_24_P344516	0.386539	8.19089	4.78274	0.000207748	0.00886498	1
ENSG00000079739	PGM1	PGM1_HUMAN	P36871	A_23_P52031	0.47146	13.9969	4.78095	0.000208505	0.00888806	1
ENSG00000140955	ADAD2	ADAD2_HUMAN	Q8NCV1	A_23_P49136	-0.342357	7.80082	-4.77853	0.00020953	0.00891758	1
ENSG00000258498	-	-	-	A_24_P759584	0.412427	7.48148	4.77603	0.000210598	0.00894945	1
ENSG00000203724	C1orf53	CA053_HUMAN	Q5VUE5	A_32_P210572	0.321554	9.0945	4.77307	0.000211868	0.00898505	1
ENSG00000256628	-	-	-	A_32_P33561	0.29288	7.83167	4.77306	0.000211873	0.00898505	1
ENSG00000065183	WDR3	WDR3_HUMAN	Q9UNX4	A_24_P122524	-0.346324	9.53021	-4.77214	0.000212271	0.00899264	1
ENSG00000176092	AIM1L	AIM1L_HUMAN	Q8N1P7	A_23_P360329	-0.347719	9.04785	-4.7696	0.000213367	0.00902974	1
ENSG00000075420	FNDC3B	FND3B_HUMAN	Q53EP0	A_24_P919304	0.433352	8.10746	4.76826	0.000213949	0.00904508	1
ENSG00000005884	ITGA3	ITA3_HUMAN	P26006	A_23_P55251	-0.536568	8.34534	-4.76534	0.000215222	0.00908791	1
ENSG00000157851	DPYSL5	DPYL5_HUMAN	Q9BPU6	A_23_P210224	-0.50137	8.04209	-4.76493	0.000215405	0.00908791	1
ENSG00000133874	RNF122	RN122_HUMAN	Q9H9V4	A_23_P134744	0.401021	11.665	4.7644	0.000215636	0.00908833	1
ENSG00000130939	UBE4B	UBE4B_HUMAN	O95155	A_23_P201279	-0.446109	11.3751	-4.76212	0.000216639	0.00911636	1
ENSG00000128335	APOL2	APOL2_HUMAN	Q9BQE5	A_24_P48898	-0.520344	8.89144	-4.76188	0.000216745	0.00911636	1
ENSG00000237943	-	-	-	A_32_P205329	0.478754	8.41297	4.76022	0.000217477	0.00913687	1
ENSG00000279390	-	-	-	A_32_P186832	-0.411378	7.01695	-4.75977	0.000217677	0.00913687	1
ENSG00000176485	PLA2G16	HRSL3_HUMAN	P53816	A_23_P116414	-0.424496	13.4996	-4.75909	0.000217975	0.00914005	1
ENSG00000164442	CITED2	CITE2_HUMAN	Q99967	A_23_P214969	0.369501	11.8274	4.75842	0.000218275	0.00914329	1
ENSG00000158296	SLC13A3	S13A3_HUMAN	Q8WWT9	A_24_P356916	0.43486	10.5027	4.75781	0.000218545	0.00914528	1
ENSG00000261701	HPR	HPTR_HUMAN	P00739	A_23_P421493	0.521154	7.74476	4.75382	0.000220325	0.00921041	1
ENSG00000215861	-	-	-	A_23_P149153	0.321388	8.25467	4.75103	0.00022158	0.00925346	1
ENSG00000178104	PDE4DIP	MYOME_HUMAN	Q5VU43	A_23_P149153	0.321388	8.25467	4.75103	0.00022158	0.00925346	1
ENSG00000174498	IGDCC3	IGDC3_HUMAN	Q8IVU1	A_23_P3274	-0.399851	9.43088	-4.7483	0.000222813	0.00928613	1
ENSG00000178035	IMPDH2	IMDH2_HUMAN	P12268	A_24_P166042	-0.334436	10.8262	-4.7483	0.000222815	0.00928613	1
ENSG00000132718	SYT11	SYT11_HUMAN	Q9BT88	A_24_P139899	-0.388738	7.48031	-4.74747	0.000223188	0.00929228	1
ENSG00000185559	DLK1	DLK1_HUMAN	P80370	A_24_P236251	0.85633	11.8048	4.74649	0.000223635	0.00929734	1
ENSG00000180198	RCC1	RCC1_HUMAN	P18754	A_23_P46309	-0.368321	9.34808	-4.7455	0.000224085	0.00929734	1
ENSG00000198183	BPIFA1	BPIA1_HUMAN	Q9NP55	A_23_P143399	0.352574	8.15188	4.7454	0.000224132	0.00929734	1
ENSG00000163209	SPRR3	SPRR3_HUMAN	Q9UBC9	A_23_P62709	0.881567	8.7198	4.74522	0.000224215	0.00929734	1
ENSG00000053254	FOXN3	FOXN3_HUMAN	O00409	A_23_P140405	-0.379006	12.7985	-4.74315	0.000225158	0.00932254	1
ENSG00000127870	RNF6	RNF6_HUMAN	Q9Y252	A_23_P162734	0.381278	9.91089	4.73879	0.000227166	0.00939129	1
ENSG00000105122	RASAL3	RASL3_HUMAN	Q86YV0	A_23_P79069	-0.409963	7.6342	-4.73579	0.00022856	0.00943941	1
ENSG00000198626	RYR2	RYR2_HUMAN	Q92736	A_23_P137797	-0.516359	7.79191	-4.73431	0.000229247	0.00944081	1
ENSG00000162522	KIAA1522	K1522_HUMAN	Q9P206	A_23_P410965	0.320643	12.2593	4.73406	0.000229367	0.00944081	1
ENSG00000151748	SAV1	SAV1_HUMAN	Q9H4B6	A_23_P65555	-0.351933	9.33314	-4.73381	0.000229481	0.00944081	1
ENSG00000124006	OBSL1	OBSL1_HUMAN	O75147	A_23_P335695	-0.398379	10.1473	-4.73369	0.000229536	0.00944081	1
ENSG00000157927	RADIL	RADIL_HUMAN	Q96JH8	A_23_P111860	0.338754	12.0687	4.73325	0.000229743	0.00944081	1
ENSG00000115290	GRB14	GRB14_HUMAN	Q14449	A_23_P154526	-0.388396	9.68783	-4.73233	0.000230176	0.00944086	1
ENSG00000097021	ACOT7	BACH_HUMAN	O00154	A_24_P205589	-0.429841	12.9902	-4.73227	0.000230203	0.00944086	1
ENSG00000197324	LRP10	LRP10_HUMAN	Q7Z4F1	A_23_P205499	0.438614	12.077	4.73132	0.000230649	0.0094497	1
ENSG00000122042	UBL3	UBL3_HUMAN	O95164	A_24_P330234	-0.456813	10.653	-4.73033	0.000231112	0.00945925	1
ENSG00000104863	LIN7B	LIN7B_HUMAN	Q9HAP6	A_23_P164912	0.371893	9.40689	4.72774	0.000232337	0.00949991	1
ENSG00000108771	DHX58	DHX58_HUMAN	Q96C10	A_23_P38346	-0.421589	8.21696	-4.72612	0.000233105	0.00952187	1
ENSG00000177455	CD19	CD19_HUMAN	P15391	A_23_P113572	-0.483969	7.90016	-4.72561	0.000233347	0.00952229	1
ENSG00000279673	-	-	-	A_32_P144852	-0.535816	8.17568	-4.72496	0.000233657	0.00952548	1
ENSG00000197647	ZNF433	ZN433_HUMAN	Q8N7K0	A_23_P27649	0.324887	8.40025	4.72356	0.000234322	0.0095431	1
ENSG00000176654	-	-	-	A_24_P68068	-0.394607	8.05915	-4.71982	0.000236115	0.00959712	1
ENSG00000158022	TRIM63	TRI63_HUMAN	Q969Q1	A_23_P114983	0.578007	7.41749	4.7175	0.000237233	0.00962632	1
ENSG00000168918	INPP5D	SHIP1_HUMAN	Q92835	A_23_P61149	-0.62598	9.58002	-4.71736	0.000237302	0.00962632	1
ENSG00000166105	GLB1L3	GLBL3_HUMAN	Q8NCI6	A_32_P741851	-0.349904	7.27626	-4.71673	0.000237606	0.00962914	1
ENSG00000229035	-	-	-	A_23_P126089	0.420039	7.57497	4.71557	0.000238171	0.00963328	1
ENSG00000109107	ALDOC	ALDOC_HUMAN	P09972	A_23_P78108	-0.428443	9.39415	-4.71478	0.000238551	0.00963328	1
ENSG00000058668	ATP2B4	AT2B4_HUMAN	P23634	A_24_P405205	0.354839	11.0996	4.71463	0.000238626	0.00963328	1
ENSG00000155366	RHOC	RHOC_HUMAN	P08134	A_23_P12514	0.35764	14.7427	4.71453	0.000238673	0.00963328	1
ENSG00000106211	HSPB1	HSPB1_HUMAN	P04792	A_32_P76247	0.424238	15.3246	4.71411	0.00023888	0.00963328	1
ENSG00000236060	-	-	-	A_32_P76247	0.424238	15.3246	4.71411	0.00023888	0.00963328	1
ENSG00000135316	SYNCRIP	HNRPQ_HUMAN	O60506	A_24_P791515	-0.458725	13.1857	-4.71167	0.000240069	0.00967173	1
ENSG00000234241	-	-	-	A_24_P791515	-0.458725	13.1857	-4.71167	0.000240069	0.00967173	1
ENSG00000280330	-	-	-	A_32_P144708	-0.537611	10.039	-4.70988	0.000240947	0.00969619	1
ENSG00000251102	-	-	-	A_32_P144708	-0.537611	10.039	-4.70988	0.000240947	0.00969619	1
ENSG00000234383	-	-	-	A_32_P144708	-0.537611	10.039	-4.70988	0.000240947	0.00969619	1
ENSG00000175029	CTBP2	CTBP2_HUMAN	P56545	A_32_P144708	-0.537611	10.039	-4.70988	0.000240947	0.00969619	1
ENSG00000279177	-	-	-	A_32_P144708	-0.537611	10.039	-4.70988	0.000240947	0.00969619	1
ENSG00000110881	ASIC1	ASIC1_HUMAN	P78348	A_23_P204751	0.437182	9.44001	4.70947	0.000241148	0.00969619	1
ENSG00000267279	-	-	-	A_32_P196142	0.526363	11.0342	4.70875	0.000241503	0.00970095	1
ENSG00000272405	-	-	-	A_32_P2730	-0.405524	7.50402	-4.70368	0.000244013	0.00979116	1
ENSG00000151694	ADAM17	ADA17_HUMAN	P78536	A_24_P157053	0.303999	9.24188	4.70292	0.000244388	0.00979116	1
ENSG00000130167	TSPAN16	TSN16_HUMAN	Q9UKR8	A_23_P142070	0.369704	6.97572	4.70277	0.000244463	0.00979116	1
ENSG00000183742	MACC1	MACC1_HUMAN	Q6ZN28	A_32_P144599	-0.679187	7.86112	-4.7015	0.000245097	0.00980699	1
ENSG00000074527	NTN4	NET4_HUMAN	Q9HB63	A_23_P204630	0.468793	10.2684	4.70003	0.000245836	0.00982435	1
ENSG00000089159	PXN	PAXI_HUMAN	P49023	A_24_P184555	-0.480423	13.7002	-4.69938	0.000246159	0.00982435	1
ENSG00000102879	CORO1A	COR1A_HUMAN	P31146	A_23_P106761	-0.350834	8.12762	-4.69649	0.000247616	0.00986932	1
ENSG00000140832	MARVELD3	MALD3_HUMAN	Q96A59	A_23_P152428	-0.502722	8.38889	-4.69578	0.000247974	0.00987404	1
ENSG00000188803	SHISA6	SHSA6_HUMAN	Q6ZSJ9	A_23_P411542	0.490645	9.66408	4.69348	0.00024914	0.00991084	1
ENSG00000197892	KIF13B	KI13B_HUMAN	Q9NQT8	A_23_P147388	0.39089	11.6022	4.69213	0.000249829	0.00991696	1
ENSG00000124440	HIF3A	HIF3A_HUMAN	Q9Y2N7	A_23_P374339	0.398391	9.39483	4.69204	0.000249873	0.00991696	1
ENSG00000143772	ITPKB	IP3KB_HUMAN	P27987	A_23_P372255	0.391231	10.4065	4.6915	0.000250152	0.00991696	1
ENSG00000100522	GNPNAT1	GNA1_HUMAN	Q96EK6	A_23_P429184	0.432064	10.9387	4.69129	0.000250259	0.00991696	1
ENSG00000196628	TCF4	ITF2_HUMAN	P15884	A_24_P918527	-0.360529	7.73386	-4.69062	0.0002506	0.00992091	1
ENSG00000111319	SCNN1A	SCNNA_HUMAN	P37088	A_23_P128323	-0.460867	8.78796	-4.68691	0.000252503	0.00998663	1
ENSG00000134871	COL4A2	CO4A2_HUMAN	P08572	A_23_P205031	0.293731	15.3108	4.68639	0.000252772	0.00998764	1
ENSG00000136153	LMO7	LMO7_HUMAN	Q8WWI1	A_23_P205159	-0.452893	8.23337	-4.68576	0.000253099	0.00999097	1
ENSG00000254706	-	-	-	A_24_P925737	-0.308996	7.03293	-4.68448	0.000253758	0.0100074	1
ENSG00000239887	C1orf226	CA226_HUMAN	A1L170	A_24_P925737	-0.308996	7.03293	-4.68448	0.000253758	0.0100074	1
ENSG00000122378	FAM213A	F213A_HUMAN	Q9BRX8	A_23_P63660	0.301995	12.4612	4.68213	0.000254979	0.0100364	1
ENSG00000266817	-	-	-	A_24_P247454	0.443094	13.7249	4.68213	0.000254982	0.0100364	1
ENSG00000213601	-	-	-	A_24_P247454	0.443094	13.7249	4.68213	0.000254982	0.0100364	1
ENSG00000279332	-	-	-	A_32_P168756	-0.379731	7.49915	-4.68008	0.000256048	0.0100687	1
ENSG00000168264	IRF2BP2	I2BP2_HUMAN	Q7Z5L9	A_23_P46588	-0.452669	12.5021	-4.67946	0.000256371	0.0100717	1
ENSG00000168243	GNG4	GBG4_HUMAN	P50150	A_23_P335329	-0.461561	11.9164	-4.67754	0.000257379	0.0100829	1
ENSG00000180914	OXTR	OXYR_HUMAN	P30559	A_24_P337104	-0.424703	7.85999	-4.67752	0.000257392	0.0100829	1
ENSG00000197217	ENTPD4	ENTP4_HUMAN	Q9Y227	A_24_P269598	0.379995	10.2948	4.67548	0.000258463	0.0101153	1
ENSG00000186469	GNG2	GBG2_HUMAN	P59768	A_32_P208403	0.468276	9.55792	4.67222	0.000260191	0.0101416	1
ENSG00000060138	YBX3	YBOX3_HUMAN	P16989	A_23_P25224	-0.495493	12.4341	-4.67222	0.000260193	0.0101416	1
ENSG00000107201	DDX58	DDX58_HUMAN	O95786	A_23_P20814	0.418858	10.8431	4.67145	0.000260601	0.0101416	1
ENSG00000103184	SEC14L5	S14L5_HUMAN	O43304	A_24_P254850	-0.295381	7.13115	-4.67142	0.000260618	0.0101416	1
ENSG00000135404	CD63	CD63_HUMAN	P08962	A_24_P270144	0.326133	16.3554	4.67108	0.000260799	0.0101416	1
ENSG00000167759	KLK13	KLK13_HUMAN	Q9UKR3	A_24_P416645	-0.379752	7.4788	-4.67096	0.000260864	0.0101416	1
ENSG00000131196	NFATC1	NFAC1_HUMAN	O95644	A_24_P258846	0.342346	8.8401	4.67044	0.000261136	0.0101426	1
ENSG00000139364	TMEM132B	T132B_HUMAN	Q14DG7	A_32_P101379	-0.412851	7.94875	-4.66821	0.000262329	0.0101793	1
ENSG00000237118	-	-	-	A_23_P89981	-0.316469	7.35512	-4.66583	0.000263611	0.0102194	1
ENSG00000197446	CYP2F1	CP2F1_HUMAN	P24903	A_23_P89981	-0.316469	7.35512	-4.66583	0.000263611	0.0102194	1
ENSG00000166407	LMO1	RBTN1_HUMAN	P25800	A_23_P87310	-0.407645	7.61751	-4.66485	0.000264138	0.0102226	1
ENSG00000117154	IGSF21	IGS21_HUMAN	Q96ID5	A_32_P78101	-0.441769	10.4045	-4.66475	0.00026419	0.0102226	1
ENSG00000169764	UGP2	UGPA_HUMAN	Q16851	A_23_P253046	-0.442034	12.6941	-4.66381	0.000264699	0.0102325	1
ENSG00000165102	HGSNAT	HGNAT_HUMAN	Q68CP4	A_23_P112061	0.398435	10.8425	4.66335	0.000264946	0.0102325	1
ENSG00000115380	EFEMP1	FBLN3_HUMAN	Q12805	A_23_P501007	-0.435098	8.58083	-4.66274	0.000265276	0.0102357	1
ENSG00000133433	Em:AP000351.3	GSTT2_HUMAN	P0CG30	A_23_P357571	-0.540892	10.4826	-4.66037	0.000266566	0.0102758	1
ENSG00000133433	GSTT2B	GSTT2_HUMAN	P0CG30	A_23_P357571	-0.540892	10.4826	-4.66037	0.000266566	0.0102758	1
ENSG00000099984	GSTT2	GST2_HUMAN	P0CG29	A_23_P357571	-0.540892	10.4826	-4.66037	0.000266566	0.0102758	1
ENSG00000198146	ZNF770	ZN770_HUMAN	Q6IQ21	A_24_P186324	-0.362021	8.43859	-4.65952	0.000267031	0.0102841	1
ENSG00000166250	CLMP	CLMP_HUMAN	Q9H6B4	A_23_P35995	0.440965	12.5289	4.65891	0.000267363	0.0102872	1
ENSG00000006606	CCL26	CCL26_HUMAN	Q9Y258	A_23_P215484	-0.386252	8.23203	-4.65732	0.00026823	0.0103109	1
ENSG00000205726	ITSN1	ITSN1_HUMAN	Q15811	A_23_P252962	0.297805	10.3982	4.65	0.000272275	0.010452	1
ENSG00000122824	NUDT10	NUD10_HUMAN	Q8NFP7	A_23_P73787	-0.544492	12.1067	-4.64976	0.000272409	0.010452	1
ENSG00000167633	KIR3DL1	KI3L1_HUMAN	P43629	A_23_P101636	-0.377583	7.04892	-4.64859	0.00027306	0.010459	1
ENSG00000240403	KIR3DL2	KI3L2_HUMAN	P43630	A_23_P101636	-0.377583	7.04892	-4.64859	0.00027306	0.010459	1
ENSG00000178150	ZNF114	ZN114_HUMAN	Q8NC26	A_23_P368779	0.393415	8.93373	4.64852	0.000273101	0.010459	1
ENSG00000104472	CHRAC1	CHRC1_HUMAN	Q9NRG0	A_23_P123544	-0.387158	9.42358	-4.64695	0.000273981	0.0104732	1
ENSG00000048649	RSF1	RSF1_HUMAN	Q96T23	A_23_P395703	-0.315509	10.9535	-4.64527	0.00027492	0.0104897	1
ENSG00000261040	-	-	-	A_24_P691826	-0.748272	8.38105	-4.64405	0.000275608	0.0105061	1
ENSG00000162981	FAM84A	FA84A_HUMAN	Q96KN4	A_23_P306215	0.480116	7.6488	4.6432	0.000276087	0.0105146	1
ENSG00000196169	KIF19	KIF19_HUMAN	Q2TAC6	A_32_P100830	0.448688	7.92779	4.64227	0.000276615	0.010525	1
ENSG00000230712	-	-	-	A_32_P319200	0.405732	9.25928	4.64156	0.000277016	0.0105305	1
ENSG00000100121	GGTLC2	GGTL2_HUMAN	Q14390	A_32_P319200	0.405732	9.25928	4.64156	0.000277016	0.0105305	1
ENSG00000100031	GGT1	GGT1_HUMAN	P19440	A_32_P319200	0.405732	9.25928	4.64156	0.000277016	0.0105305	1
ENSG00000156026	MCU	MCU_HUMAN	Q8NE86	A_23_P346405	-0.307971	8.94078	-4.63832	0.000278858	0.0105757	1
ENSG00000234241	-	-	-	A_32_P8402	-0.361746	11.604	-4.63811	0.000278979	0.0105757	1
ENSG00000275023	MLLT6	-	-	A_24_P719579	0.364571	10.2624	4.63668	0.000279798	0.010597	1
ENSG00000277972	CISD3	CISD3_HUMAN	P0C7P0	A_24_P719579	0.364571	10.2624	4.63668	0.000279798	0.010597	1
ENSG00000099250	NRP1	NRP1_HUMAN	O14786	A_24_P135322	0.505133	9.7304	4.63424	0.000281195	0.0106401	1
ENSG00000228594	C1orf233	CA233_HUMAN	F2Z333	A_24_P731549	-0.318733	10.3712	-4.63299	0.000281917	0.0106485	1
ENSG00000243479	-	-	-	A_32_P185317	0.406365	9.03478	4.63296	0.000281935	0.0106485	1
ENSG00000150510	FAM124A	F124A_HUMAN	Q86V42	A_24_P239538	0.361887	9.63184	4.63102	0.000283056	0.010681	1
ENSG00000048162	NOP16	NOP16_HUMAN	Q9Y3C1	A_23_P144726	-0.436727	13.7514	-4.6303	0.000283471	0.0106869	1
ENSG00000151491	EPS8	EPS8_HUMAN	Q12929	A_23_P136347	-0.497224	7.93479	-4.62942	0.000283981	0.0106963	1
ENSG00000167105	TMEM92	TMM92_HUMAN	Q6UXU6	A_23_P38388	0.392529	11.0719	4.62824	0.000284668	0.0107123	1
ENSG00000186297	GABRA5	GBRA5_HUMAN	P31644	A_23_P436618	-0.329559	7.41302	-4.62553	0.000286256	0.0107446	1
ENSG00000185019	UBOX5	RNF37_HUMAN	O94941	A_24_P79241	0.279161	9.24968	4.62418	0.000287046	0.0107624	1
ENSG00000278044	-	-	-	A_23_P132159	-0.461807	9.4866	-4.6214	0.000288681	0.0108138	1
ENSG00000184979	USP18	UBP18_HUMAN	Q9UMW8	A_23_P132159	-0.461807	9.4866	-4.6214	0.000288681	0.0108138	1
ENSG00000203780	FANK1	FANK1_HUMAN	Q8TC84	A_23_P115785	0.496634	8.77583	4.61842	0.000290449	0.0108702	1
ENSG00000276180	HIST1H4A	H4_HUMAN	P62805	A_24_P20873	-0.444352	11.6963	-4.61583	0.000291996	0.0109181	1
ENSG00000276180	HIST1H4B	H4_HUMAN	P62805	A_24_P20873	-0.444352	11.6963	-4.61583	0.000291996	0.0109181	1
ENSG00000276180	HIST1H4C	H4_HUMAN	P62805	A_24_P20873	-0.444352	11.6963	-4.61583	0.000291996	0.0109181	1
ENSG00000276180	HIST1H4D	H4_HUMAN	P62805	A_24_P20873	-0.444352	11.6963	-4.61583	0.000291996	0.0109181	1
ENSG00000276180	HIST1H4E	H4_HUMAN	P62805	A_24_P20873	-0.444352	11.6963	-4.61583	0.000291996	0.0109181	1
ENSG00000276180	HIST1H4F	H4_HUMAN	P62805	A_24_P20873	-0.444352	11.6963	-4.61583	0.000291996	0.0109181	1
ENSG00000276180	HIST1H4H	H4_HUMAN	P62805	A_24_P20873	-0.444352	11.6963	-4.61583	0.000291996	0.0109181	1
ENSG00000276180	HIST1H4I	H4_HUMAN	P62805	A_24_P20873	-0.444352	11.6963	-4.61583	0.000291996	0.0109181	1
ENSG00000276180	HIST1H4J	H4_HUMAN	P62805	A_24_P20873	-0.444352	11.6963	-4.61583	0.000291996	0.0109181	1
ENSG00000276180	HIST1H4K	H4_HUMAN	P62805	A_24_P20873	-0.444352	11.6963	-4.61583	0.000291996	0.0109181	1
ENSG00000276180	HIST1H4L	H4_HUMAN	P62805	A_24_P20873	-0.444352	11.6963	-4.61583	0.000291996	0.0109181	1
ENSG00000276180	HIST2H4A	H4_HUMAN	P62805	A_24_P20873	-0.444352	11.6963	-4.61583	0.000291996	0.0109181	1
ENSG00000276180	HIST2H4B	H4_HUMAN	P62805	A_24_P20873	-0.444352	11.6963	-4.61583	0.000291996	0.0109181	1
ENSG00000276180	HIST4H4	H4_HUMAN	P62805	A_24_P20873	-0.444352	11.6963	-4.61583	0.000291996	0.0109181	1
ENSG00000039560	RAI14	RAI14_HUMAN	Q9P0K7	A_23_P92727	-0.373628	10.5539	-4.61246	0.000294019	0.0109753	1
ENSG00000015532	XYLT2	XYLT2_HUMAN	Q9H1B5	A_23_P15582	0.406765	13.5686	4.60977	0.000295642	0.0110216	1
ENSG00000150995	ITPR1	ITPR1_HUMAN	Q14643	A_23_P92042	-0.362669	7.79681	-4.60945	0.000295836	0.0110216	1
ENSG00000182963	DKFZp686P0738	CXG1_HUMAN	P36383	A_23_P428287	-0.504871	9.96652	-4.60496	0.00029857	0.0111089	1
ENSG00000182963	GJC1	CXG1_HUMAN	P36383	A_23_P428287	-0.504871	9.96652	-4.60496	0.00029857	0.0111089	1
ENSG00000101680	LAMA1	LAMA1_HUMAN	P25391	A_23_P118967	0.417278	7.75742	4.60471	0.000298721	0.0111089	1
ENSG00000140941	MAP1LC3B	MLP3B_HUMAN	Q9GZQ8	A_24_P108005	0.380536	11.4622	4.60316	0.000299673	0.0111307	1
ENSG00000213740	-	-	-	A_32_P139079	-0.386077	14.7415	-4.60287	0.000299848	0.0111307	1
ENSG00000142864	SERBP1	PAIRB_HUMAN	Q8NC51	A_32_P139079	-0.386077	14.7415	-4.60287	0.000299848	0.0111307	1
ENSG00000152256	PDK1	PDK1_HUMAN	Q15118	A_24_P37441	-0.449809	9.29411	-4.60129	0.000300825	0.0111569	1
ENSG00000116729	WLS	WLS_HUMAN	Q5T9L3	A_24_P256380	0.646936	9.90391	4.59942	0.000301978	0.0111766	1
ENSG00000106665	CLIP2	CLIP2_HUMAN	Q9UDT6	A_23_P215479	-0.347286	11.3328	-4.59909	0.000302179	0.0111766	1
ENSG00000166197	NOLC1	NOLC1_HUMAN	Q14978	A_23_P202143	-0.405811	12.3775	-4.59905	0.000302207	0.0111766	1
ENSG00000167244	IGF2	IGF2_HUMAN	P01344	A_23_P150609	0.481222	10.5468	4.59866	0.000302445	0.0111766	1
ENSG00000240801	-	-	-	A_23_P150609	0.481222	10.5468	4.59866	0.000302445	0.0111766	1
ENSG00000133433	Em:AP000351.3	GSTT2_HUMAN	P0CG30	A_23_P109427	-0.586047	10.9253	-4.5982	0.000302734	0.0111772	1
ENSG00000133433	GSTT2B	GSTT2_HUMAN	P0CG30	A_23_P109427	-0.586047	10.9253	-4.5982	0.000302734	0.0111772	1
ENSG00000099984	GSTT2	GST2_HUMAN	P0CG29	A_23_P109427	-0.586047	10.9253	-4.5982	0.000302734	0.0111772	1
ENSG00000135749	PCNXL2	PCX2_HUMAN	A6NKB5	A_23_P200260	-0.383158	10.0527	-4.59646	0.000303816	0.0112071	1
ENSG00000163938	GNL3	GNL3_HUMAN	Q9BVP2	A_23_P41025	-0.306029	11.9699	-4.59383	0.000305459	0.0112576	1
ENSG00000133392	MYH11	MYH11_HUMAN	P35749	A_24_P70183	-0.36168	7.3207	-4.59275	0.000306131	0.0112723	1
ENSG00000150627	WDR17	WDR17_HUMAN	Q8IZU2	A_24_P91985	-0.373575	6.89574	-4.59196	0.00030663	0.0112805	1
ENSG00000183199	-	-	-	A_32_P147505	-0.35459	12.453	-4.58846	0.000308836	0.0113515	1
ENSG00000101443	WFDC2	WFDC2_HUMAN	Q14508	A_24_P14464	0.679369	13.7771	4.58578	0.000310543	0.011404	1
ENSG00000259781	-	-	-	A_32_P134580	-0.401651	13.8661	-4.58526	0.000310874	0.0114049	1
ENSG00000189403	HMGB1	HMGB1_HUMAN	P09429	A_32_P134580	-0.401651	13.8661	-4.58526	0.000310874	0.0114049	1
ENSG00000275029	-	-	-	A_32_P134580	-0.401651	13.8661	-4.58526	0.000310874	0.0114049	1
ENSG00000213707	-	-	-	A_32_P134580	-0.401651	13.8661	-4.58526	0.000310874	0.0114049	1
ENSG00000132967	-	-	-	A_32_P134580	-0.401651	13.8661	-4.58526	0.000310874	0.0114049	1
ENSG00000223814	-	-	-	A_32_P232214	0.396151	10.9179	4.58487	0.00031112	0.0114049	1
ENSG00000269113	TRABD2B	TIKI2_HUMAN	A6NFA1	A_32_P232214	0.396151	10.9179	4.58487	0.00031112	0.0114049	1
ENSG00000150938	CRIM1	CRIM1_HUMAN	Q9NZV1	A_23_P51105	-0.29894	7.88148	-4.58322	0.000312178	0.0114335	1
ENSG00000164733	CTSB	CATB_HUMAN	P07858	A_23_P215944	0.493894	12.0245	4.58078	0.000313742	0.0114805	1
ENSG00000131943	C19orf12	CS012_HUMAN	Q9NSK7	A_24_P113341	0.300263	11.1339	4.5786	0.00031515	0.0115115	1
ENSG00000270882	HIST1H4A	H4_HUMAN	P62805	A_23_P436281	-0.558997	12.1443	-4.57782	0.000315649	0.0115192	1
ENSG00000270882	HIST1H4B	H4_HUMAN	P62805	A_23_P436281	-0.558997	12.1443	-4.57782	0.000315649	0.0115192	1
ENSG00000270882	HIST1H4C	H4_HUMAN	P62805	A_23_P436281	-0.558997	12.1443	-4.57782	0.000315649	0.0115192	1
ENSG00000270882	HIST1H4D	H4_HUMAN	P62805	A_23_P436281	-0.558997	12.1443	-4.57782	0.000315649	0.0115192	1
ENSG00000270882	HIST1H4E	H4_HUMAN	P62805	A_23_P436281	-0.558997	12.1443	-4.57782	0.000315649	0.0115192	1
ENSG00000270882	HIST1H4F	H4_HUMAN	P62805	A_23_P436281	-0.558997	12.1443	-4.57782	0.000315649	0.0115192	1
ENSG00000270882	HIST1H4H	H4_HUMAN	P62805	A_23_P436281	-0.558997	12.1443	-4.57782	0.000315649	0.0115192	1
ENSG00000270882	HIST1H4I	H4_HUMAN	P62805	A_23_P436281	-0.558997	12.1443	-4.57782	0.000315649	0.0115192	1
ENSG00000270882	HIST1H4J	H4_HUMAN	P62805	A_23_P436281	-0.558997	12.1443	-4.57782	0.000315649	0.0115192	1
ENSG00000270882	HIST1H4K	H4_HUMAN	P62805	A_23_P436281	-0.558997	12.1443	-4.57782	0.000315649	0.0115192	1
ENSG00000270882	HIST1H4L	H4_HUMAN	P62805	A_23_P436281	-0.558997	12.1443	-4.57782	0.000315649	0.0115192	1
ENSG00000270882	HIST2H4A	H4_HUMAN	P62805	A_23_P436281	-0.558997	12.1443	-4.57782	0.000315649	0.0115192	1
ENSG00000270882	HIST2H4B	H4_HUMAN	P62805	A_23_P436281	-0.558997	12.1443	-4.57782	0.000315649	0.0115192	1
ENSG00000270882	HIST4H4	H4_HUMAN	P62805	A_23_P436281	-0.558997	12.1443	-4.57782	0.000315649	0.0115192	1
ENSG00000270276	HIST1H4A	H4_HUMAN	P62805	A_23_P436281	-0.558997	12.1443	-4.57782	0.000315649	0.0115192	1
ENSG00000270276	HIST1H4B	H4_HUMAN	P62805	A_23_P436281	-0.558997	12.1443	-4.57782	0.000315649	0.0115192	1
ENSG00000270276	HIST1H4C	H4_HUMAN	P62805	A_23_P436281	-0.558997	12.1443	-4.57782	0.000315649	0.0115192	1
ENSG00000270276	HIST1H4D	H4_HUMAN	P62805	A_23_P436281	-0.558997	12.1443	-4.57782	0.000315649	0.0115192	1
ENSG00000270276	HIST1H4E	H4_HUMAN	P62805	A_23_P436281	-0.558997	12.1443	-4.57782	0.000315649	0.0115192	1
ENSG00000270276	HIST1H4F	H4_HUMAN	P62805	A_23_P436281	-0.558997	12.1443	-4.57782	0.000315649	0.0115192	1
ENSG00000270276	HIST1H4H	H4_HUMAN	P62805	A_23_P436281	-0.558997	12.1443	-4.57782	0.000315649	0.0115192	1
ENSG00000270276	HIST1H4I	H4_HUMAN	P62805	A_23_P436281	-0.558997	12.1443	-4.57782	0.000315649	0.0115192	1
ENSG00000270276	HIST1H4J	H4_HUMAN	P62805	A_23_P436281	-0.558997	12.1443	-4.57782	0.000315649	0.0115192	1
ENSG00000270276	HIST1H4K	H4_HUMAN	P62805	A_23_P436281	-0.558997	12.1443	-4.57782	0.000315649	0.0115192	1
ENSG00000270276	HIST1H4L	H4_HUMAN	P62805	A_23_P436281	-0.558997	12.1443	-4.57782	0.000315649	0.0115192	1
ENSG00000270276	HIST2H4A	H4_HUMAN	P62805	A_23_P436281	-0.558997	12.1443	-4.57782	0.000315649	0.0115192	1
ENSG00000270276	HIST2H4B	H4_HUMAN	P62805	A_23_P436281	-0.558997	12.1443	-4.57782	0.000315649	0.0115192	1
ENSG00000270276	HIST4H4	H4_HUMAN	P62805	A_23_P436281	-0.558997	12.1443	-4.57782	0.000315649	0.0115192	1
ENSG00000027075	PRKCH	KPCL_HUMAN	P24723	A_23_P205567	-0.449546	10.7277	-4.5774	0.000315921	0.0115192	1
ENSG00000154548	SRSF12	SRS12_HUMAN	Q8WXF0	A_23_P110903	0.355863	9.4862	4.57666	0.000316401	0.0115265	1
ENSG00000246985	-	-	-	A_32_P112712	0.35466	7.83955	4.57549	0.000317167	0.0115341	1
ENSG00000120910	PPP3CC	PP2BC_HUMAN	P48454	A_23_P157495	0.444656	9.52593	4.57548	0.00031717	0.0115341	1
ENSG00000178445	GLDC	GCSP_HUMAN	P23378	A_23_P123596	-0.767739	11.4724	-4.57457	0.00031776	0.0115453	1
ENSG00000173621	LRFN4	LRFN4_HUMAN	Q6PJG9	A_23_P63980	-0.36718	11.2886	-4.57383	0.000318248	0.0115528	1
ENSG00000075643	MOCOS	MOCOS_HUMAN	Q96EN8	A_23_P67042	-0.402458	7.81463	-4.57325	0.000318625	0.0115563	1
ENSG00000117625	RCOR3	RCOR3_HUMAN	Q9P2K3	A_32_P167122	0.458226	10.0832	4.56917	0.000321304	0.0116432	1
ENSG00000265763	ZNF488	ZN488_HUMAN	Q96MN9	A_23_P23966	-0.459244	7.90256	-4.5683	0.000321878	0.0116516	1
ENSG00000152270	PDE3B	PDE3B_HUMAN	Q13370	A_23_P116114	-0.377277	7.89588	-4.56768	0.000322289	0.0116516	1
ENSG00000184428	TOP1MT	TOP1M_HUMAN	Q969P6	A_24_P248053	-0.300409	11.566	-4.56753	0.000322387	0.0116516	1
ENSG00000101191	DIDO1	DIDO1_HUMAN	Q9BTC0	A_24_P322611	-0.42886	9.48809	-4.56607	0.000323356	0.0116699	1
ENSG00000197892	KIF13B	KI13B_HUMAN	Q9NQT8	A_32_P165611	0.419788	10.1911	4.56591	0.000323463	0.0116699	1
ENSG00000088992	TESC	CHP3_HUMAN	Q96BS2	A_23_P76538	0.415197	12.6785	4.56189	0.000326139	0.0117484	1
ENSG00000127666	TICAM1	TCAM1_HUMAN	Q8IUC6	A_23_P90311	0.444919	9.69952	4.56179	0.00032621	0.0117484	1
ENSG00000172819	RARG	RARG_HUMAN	P13631	A_23_P387552	-0.402332	10.0084	-4.55808	0.000328703	0.0118175	1
ENSG00000119862	LGALSL	LEGL_HUMAN	Q3ZCW2	A_23_P210330	0.41514	11.4634	4.5563	0.000329907	0.0118504	1
ENSG00000077348	EXOSC5	EXOS5_HUMAN	Q9NQT4	A_24_P211151	-0.375851	9.49385	-4.55147	0.000333193	0.0119567	1
ENSG00000185043	CIB1	CIB1_HUMAN	Q99828	A_23_P257638	0.330544	12.1972	4.55077	0.000333671	0.0119567	1
ENSG00000213853	EMP2	EMP2_HUMAN	P54851	A_23_P106682	0.316213	11.5157	4.55067	0.000333739	0.0119567	1
ENSG00000169499	PLEKHA2	PKHA2_HUMAN	Q9HB19	A_32_P150130	-0.392168	7.41649	-4.54991	0.000334264	0.0119651	1
ENSG00000174136	RGMB	RGMB_HUMAN	Q6NW40	A_23_P58796	0.307493	9.92269	4.54827	0.000335389	0.0119748	1
ENSG00000110092	CCND1	CCND1_HUMAN	P24385	A_24_P124550	-0.451244	8.34674	-4.5482	0.000335439	0.0119748	1
ENSG00000171490	RSL1D1	RL1D1_HUMAN	O76021	A_24_P222022	-0.423255	9.52645	-4.54763	0.000335836	0.0119748	1
ENSG00000105255	FSD1	FSD1_HUMAN	Q9BTV5	A_23_P153651	-0.33358	10.0679	-4.54761	0.000335844	0.0119748	1
ENSG00000125898	FAM110A	F110A_HUMAN	Q9BQ89	A_23_P386241	0.341937	11.7565	4.5474	0.000335992	0.0119748	1
ENSG00000227057	WDR46	WDR46_HUMAN	O15213	A_24_P389038	-0.376828	9.50013	-4.5466	0.000336542	0.011984	1
ENSG00000128585	MKLN1	MKLN1_HUMAN	Q9UL63	A_23_P93613	0.404497	10.2779	4.54532	0.000337434	0.0119988	1
ENSG00000197124	ZNF682	ZN682_HUMAN	O95780	A_24_P944588	0.334252	9.27042	4.54516	0.000337542	0.0119988	1
ENSG00000159131	GART	PUR2_HUMAN	P22102	A_23_P80098	-0.458121	12.4131	-4.54376	0.000338513	0.0120229	1
ENSG00000279307	-	-	-	A_32_P49555	-0.308754	10.6785	-4.54135	0.000340194	0.0120618	1
ENSG00000164182	NDUFAF2	MIMIT_HUMAN	Q8N183	A_32_P49555	-0.308754	10.6785	-4.54135	0.000340194	0.0120618	1
ENSG00000078401	EDN1	EDN1_HUMAN	P05305	A_23_P214821	-0.721691	8.83595	-4.54081	0.00034057	0.0120627	1
ENSG00000164651	SP8	SP8_HUMAN	Q8IXZ3	A_24_P23546	0.374777	7.82021	4.54004	0.000341114	0.0120627	1
ENSG00000228109	-	-	-	A_24_P459880	0.460377	8.35541	4.5396	0.000341421	0.0120627	1
ENSG00000144488	ESPNL	ESPNL_HUMAN	Q6ZVH7	A_24_P170983	-0.402582	7.64539	-4.53956	0.000341446	0.0120627	1
ENSG00000060718	COL11A1	COBA1_HUMAN	P12107	A_23_P11806	-0.695055	10.1941	-4.53881	0.000341974	0.0120627	1
ENSG00000198142	SOWAHC	SWAHC_HUMAN	Q53LP3	A_23_P120354	-0.497747	10.273	-4.53825	0.000342369	0.0120627	1
ENSG00000162069	CCDC64B	BICR2_HUMAN	A1A5D9	A_24_P273647	-0.506594	9.64892	-4.53778	0.000342702	0.0120627	1
ENSG00000101443	WFDC2	WFDC2_HUMAN	Q14508	A_23_P218675	0.713409	15.1141	4.5377	0.000342757	0.0120627	1
ENSG00000089847	ANKRD24	ANR24_HUMAN	Q8TF21	A_32_P191786	-0.320092	7.76365	-4.53755	0.000342861	0.0120627	1
ENSG00000102554	KLF5	KLF5_HUMAN	Q13887	A_24_P210406	0.436045	10.0671	4.53698	0.000343262	0.0120664	1
ENSG00000185222	WBP5	WBP5_HUMAN	Q9UHQ7	A_23_P34142	0.370211	12.683	4.53424	0.000345198	0.0121021	1
ENSG00000139219	COL2A1	CO2A1_HUMAN	P02458	A_23_P500464	0.54958	10.4143	4.53409	0.000345311	0.0121021	1
ENSG00000130813	C19orf66	CS066_HUMAN	Q9NUL5	A_23_P38894	-0.396102	9.79723	-4.53388	0.000345454	0.0121021	1
ENSG00000261496	-	-	-	A_24_P810104	0.304041	7.75013	4.53238	0.000346523	0.0121195	1
ENSG00000147174	ACRC	ACRC_HUMAN	Q96QF7	A_23_P171237	0.44553	8.5637	4.53236	0.00034654	0.0121195	1
ENSG00000084070	SMAP2	SMAP2_HUMAN	Q8WU79	A_24_P225325	0.447391	8.10072	4.53106	0.000347466	0.0121258	1
ENSG00000075420	FNDC3B	FND3B_HUMAN	Q53EP0	A_23_P253434	0.353773	11.9362	4.531	0.000347511	0.0121258	1
ENSG00000162614	NEXN	NEXN_HUMAN	Q0ZGT2	A_23_P200001	0.496699	9.87334	4.53086	0.000347608	0.0121258	1
ENSG00000117724	CENPF	CENPF_HUMAN	P49454	A_23_P401	-0.418585	13.1593	-4.53031	0.000347999	0.0121292	1
ENSG00000176076	KCNE1L	KCE1L_HUMAN	Q9UJ90	A_23_P349267	-0.367559	8.13252	-4.52627	0.000350905	0.0122146	1
ENSG00000068366	ACSL4	ACSL4_HUMAN	O60488	A_23_P349267	-0.367559	8.13252	-4.52627	0.000350905	0.0122146	1
ENSG00000148400	NOTCH1	NOTC1_HUMAN	P46531	A_23_P60387	-0.275276	7.49099	-4.52511	0.000351745	0.0122146	1
ENSG00000136436	CALCOCO2	CACO2_HUMAN	Q13137	A_23_P4223	0.327394	9.53896	4.52444	0.000352225	0.0122146	1
ENSG00000088756	ARHGAP28	RHG28_HUMAN	Q9P2N2	A_23_P130359	0.503328	11.4729	4.52432	0.000352311	0.0122146	1
ENSG00000171766	GATM	GATM_HUMAN	P50440	A_23_P129064	0.60522	12.4189	4.52402	0.000352531	0.0122146	1
ENSG00000213958	-	-	-	A_24_P418687	0.451363	14.0435	4.52158	0.000354301	0.0122656	1
ENSG00000196754	S100A2	S10A2_HUMAN	P29034	A_23_P201706	0.338529	8.58256	4.52076	0.000354904	0.0122745	1
ENSG00000119403	PHF19	PHF19_HUMAN	Q5T6S3	A_23_P401904	0.322478	11.7349	4.52041	0.000355155	0.0122745	1
ENSG00000132274	TRIM22	TRI22_HUMAN	Q8IYM9	A_23_P203498	-0.654019	8.7866	-4.51982	0.000355588	0.0122791	1
ENSG00000174132	FAM174A	F174A_HUMAN	Q8TBP5	A_23_P30283	0.347499	8.98045	4.51902	0.000356174	0.0122891	1
ENSG00000136160	EDNRB	EDNRB_HUMAN	P24530	A_23_P2831	-0.52301	10.7489	-4.51813	0.000356828	0.0123013	1
ENSG00000159166	LAD1	LAD1_HUMAN	O00515	A_23_P415510	-0.395234	9.36019	-4.51631	0.000358169	0.0123372	1
ENSG00000251637	-	-	-	A_32_P69333	0.450871	8.92682	4.51513	0.000359037	0.0123567	1
ENSG00000267745	-	-	-	A_24_P919452	-0.529175	9.40718	-4.51282	0.000360747	0.0124052	1
ENSG00000267648	-	-	-	A_24_P919452	-0.529175	9.40718	-4.51282	0.000360747	0.0124052	1
ENSG00000130700	GATA5	GATA5_HUMAN	Q9BWX5	A_23_P371835	0.465314	8.07332	4.50992	0.000362907	0.012469	1
ENSG00000256861	-	-	-	A_23_P47800	0.296962	13.203	4.50796	0.000364374	0.0124963	1
ENSG00000184047	DIABLO	DBLOH_HUMAN	Q9NR28	A_23_P47800	0.296962	13.203	4.50796	0.000364374	0.0124963	1
ENSG00000106524	ANKMY2	ANKY2_HUMAN	Q8IV38	A_23_P20002	0.428931	9.11788	4.50764	0.000364615	0.0124963	1
ENSG00000056558	TRAF1	TRAF1_HUMAN	Q13077	A_23_P216970	0.301189	7.78706	4.50626	0.000365646	0.0125142	1
ENSG00000196369	SRGAP2B	SRG2B_HUMAN	P0DMP2	A_32_P212024	0.516729	10.4728	4.50613	0.000365744	0.0125142	1
ENSG00000171943	SRGAP2C	SRG2C_HUMAN	P0DJJ0	A_32_P212024	0.516729	10.4728	4.50613	0.000365744	0.0125142	1
ENSG00000020577	SAMD4A	SMAG1_HUMAN	Q9UPU9	A_24_P383523	-0.5163	8.57547	-4.50367	0.000367603	0.0125673	1
ENSG00000275202	-	-	-	A_32_P88905	0.477989	9.10621	4.50311	0.000368026	0.0125713	1
ENSG00000230356	-	-	-	A_24_P638453	-0.372997	8.97039	-4.49682	0.00037282	0.0127245	1
ENSG00000234439	-	-	-	A_24_P16230	0.460337	13.3254	4.4949	0.0003743	0.0127644	1
ENSG00000074695	LMAN1	LMAN1_HUMAN	P49257	A_23_P78342	0.320701	9.51863	4.49363	0.00037528	0.0127758	1
ENSG00000147003	TMEM27	TMM27_HUMAN	Q9HBJ8	A_23_P33984	0.419663	8.22105	4.4933	0.000375533	0.0127758	1
ENSG00000139266	2009-03-01	MARH9_HUMAN	Q86YJ5	A_23_P47777	0.374777	10.8584	4.49312	0.000375676	0.0127758	1
ENSG00000053254	FOXN3	FOXN3_HUMAN	O00409	A_23_P88435	-0.526884	9.56426	-4.49286	0.000375878	0.0127758	1
ENSG00000015475	BID	BID_HUMAN	P55957	A_24_P187948	-0.289447	12.103	-4.49075	0.000377514	0.0128208	1
ENSG00000239704	CDRT4	CDRT4_HUMAN	Q8N9R6	A_23_P427083	0.325166	9.57471	4.48848	0.000379282	0.0128459	1
ENSG00000259024	TVP23C	-	-	A_23_P427083	0.325166	9.57471	4.48848	0.000379282	0.0128459	1
ENSG00000128285	MCHR1	MCHR1_HUMAN	Q99705	A_23_P211543	-0.277846	7.22462	-4.48847	0.000379289	0.0128459	1
ENSG00000188735	TMEM120B	T120B_HUMAN	A0PK00	A_24_P119131	0.292157	8.78247	4.4882	0.000379502	0.0128459	1
ENSG00000274145	RILP	RILP_HUMAN	Q96NA2	A_24_P185117	-0.321858	8.70196	-4.48404	0.000382767	0.0129289	1
ENSG00000167705	RILP	RILP_HUMAN	Q96NA2	A_24_P185117	-0.321858	8.70196	-4.48404	0.000382767	0.0129289	1
ENSG00000100889	PCK2	PCKGM_HUMAN	Q16822	A_23_P140207	-0.422884	13.7088	-4.48397	0.000382823	0.0129289	1
ENSG00000115525	ST3GAL5	SIAT9_HUMAN	Q9UNP4	A_23_P311869	0.333547	8.26787	4.4835	0.000383195	0.0129289	1
ENSG00000275713	HIST1H2BH	H2B1H_HUMAN	Q93079	A_23_P366216	-0.30873	13.1087	-4.48315	0.000383466	0.0129289	1
ENSG00000166292	TMEM100	TM100_HUMAN	Q9NV29	A_23_P15450	0.741802	8.96488	4.48307	0.000383529	0.0129289	1
ENSG00000165113	GKAP1	GKAP1_HUMAN	Q5VSY0	A_23_P94546	0.325304	8.66431	4.4826	0.0003839	0.0129302	1
ENSG00000116406	EDEM3	EDEM3_HUMAN	Q9BZQ6	A_24_P208045	0.32298	9.95157	4.48201	0.000384369	0.0129302	1
ENSG00000118523	CTGF	CTGF_HUMAN	P29279	A_23_P19663	-1.02425	11.9868	-4.48183	0.000384511	0.0129302	1
ENSG00000226742	HSBP1L1	HSBPL_HUMAN	C9JCN9	A_32_P46981	0.462216	8.91106	4.4814	0.000384855	0.0129312	1
ENSG00000129514	FOXA1	FOXA1_HUMAN	P55317	A_24_P347431	0.818265	10.5498	4.48015	0.000385849	0.0129383	1
ENSG00000124313	IQSEC2	IQEC2_HUMAN	Q5JU85	A_23_P330788	-0.516505	9.27806	-4.47966	0.000386237	0.0129383	1
ENSG00000029534	ANK1	ANK1_HUMAN	P16157	A_23_P216108	-0.440128	8.14711	-4.47921	0.000386591	0.0129383	1
ENSG00000136111	TBC1D4	TBCD4_HUMAN	O60343	A_23_P88095	-0.53197	7.78947	-4.47897	0.000386786	0.0129383	1
ENSG00000177508	IRX3	IRX3_HUMAN	P78415	A_23_P152235	0.79952	7.93252	4.47876	0.000386956	0.0129383	1
ENSG00000266970	-	-	-	A_32_P116488	0.287853	8.77482	4.47619	0.000389005	0.0129875	1
ENSG00000173890	GPR160	GP160_HUMAN	Q9UJ42	A_23_P167005	-0.410529	9.77333	-4.47612	0.00038906	0.0129875	1
ENSG00000236094	-	-	-	A_24_P804951	-0.519761	7.86104	-4.47211	0.000392293	0.0130848	1
ENSG00000165030	NFIL3	NFIL3_HUMAN	Q16649	A_23_P32253	0.429755	10.7259	4.47125	0.00039299	0.0130953	1
ENSG00000258951	-	-	-	A_24_P195164	0.422358	14.5168	4.47093	0.000393244	0.0130953	1
ENSG00000140382	HMG20A	HM20A_HUMAN	Q9NP66	A_23_P206084	0.362486	9.21434	4.47029	0.000393763	0.0131019	1
ENSG00000150093	ITGB1	ITB1_HUMAN	P05556	A_23_P104199	-0.38348	10.3457	-4.46962	0.000394312	0.0131096	1
ENSG00000237438	-	-	-	A_24_P403501	0.480741	11.5403	4.46808	0.000395565	0.0131367	1
ENSG00000166900	STX3	STX3_HUMAN	Q13277	A_23_P139143	0.355258	10.4742	4.46783	0.000395767	0.0131367	1
ENSG00000113594	LIFR	LIFR_HUMAN	P42702	A_24_P397386	0.437331	9.87755	4.46702	0.000396433	0.0131482	1
ENSG00000168140	VASN	VASN_HUMAN	Q6EMK4	A_23_P129695	0.411914	9.83763	4.46391	0.000398983	0.0132221	1
ENSG00000135409	AMHR2	AMHR2_HUMAN	Q16671	A_24_P115990	0.61197	8.89421	4.4634	0.0003994	0.0132252	1
ENSG00000153944	MSI2	MSI2H_HUMAN	Q96DH6	A_23_P44195	0.372952	10.0286	4.46257	0.00040008	0.0132371	1
ENSG00000124098	FAM210B	F210B_HUMAN	Q96KR6	A_24_P399680	0.308311	10.7382	4.4609	0.000401463	0.0132587	1
ENSG00000137393	RNF144B	R144B_HUMAN	Q7Z419	A_24_P406060	-0.508601	8.09719	-4.46065	0.000401669	0.0132587	1
ENSG00000270885	RASL10B	RSLAB_HUMAN	Q96S79	A_24_P322229	0.420126	9.56251	4.46032	0.00040194	0.0132587	1
ENSG00000245532	-	-	-	A_24_P566916	0.404411	7.60196	4.45821	0.000403694	0.0133031	1
ENSG00000197705	KLHL14	KLH14_HUMAN	Q9P2G3	A_23_P370830	0.367869	7.10841	4.45141	0.000409398	0.0134537	1
ENSG00000096384	HSP90AB1	HS90B_HUMAN	P08238	A_23_P145089	-0.297272	14.2786	-4.45135	0.00040945	0.0134537	1
ENSG00000183199	-	-	-	A_23_P145089	-0.297272	14.2786	-4.45135	0.00040945	0.0134537	1
ENSG00000109956	B3GAT1	B3GA1_HUMAN	Q9P2W7	A_23_P1833	-0.459341	10.3477	-4.45106	0.000409694	0.0134537	1
ENSG00000184254	ALDH1A3	AL1A3_HUMAN	P47895	A_23_P205959	0.417761	10.6785	4.44933	0.000411156	0.0134732	1
ENSG00000189171	S100A13	S10AD_HUMAN	Q99584	A_23_P372874	0.501831	15.5873	4.44916	0.000411305	0.0134732	1
ENSG00000140451	PIF1	PIF1_HUMAN	Q9H611	A_23_P416468	-0.447016	12.0371	-4.44885	0.000411566	0.0134732	1
ENSG00000148154	UGCG	CEGT_HUMAN	Q16739	A_23_P123645	-0.531366	9.54205	-4.44857	0.000411807	0.0134732	1
ENSG00000271601	LIX1L	LIX1L_HUMAN	Q8IVB5	A_23_P342744	0.514729	9.41358	4.44777	0.00041248	0.0134845	1
ENSG00000204475	NCR3	NCTR3_HUMAN	O14931	A_32_P468522	0.317119	7.39086	4.4443	0.000415446	0.0135653	1
ENSG00000104219	ZDHHC2	ZDHC2_HUMAN	Q9UIJ5	A_24_P286687	0.420873	10.584	4.44407	0.000415648	0.0135653	1
ENSG00000152208	GRID2	GRID2_HUMAN	O43424	A_32_P229221	-0.592992	9.13139	-4.44372	0.000415942	0.0135653	1
ENSG00000059804	SLC2A3	GTR3_HUMAN	P11169	A_24_P81900	0.393365	12.732	4.43998	0.00041917	0.0136549	1
ENSG00000205220	PSMB10	PSB10_HUMAN	P40306	A_23_P140807	-0.451471	12.2608	-4.43976	0.000419355	0.0136549	1
ENSG00000261884	-	-	-	A_23_P140807	-0.451471	12.2608	-4.43976	0.000419355	0.0136549	1
ENSG00000187514	PTMA	PTMA_HUMAN	P06454	A_24_P34632	-0.616871	14.6978	-4.4391	0.000419927	0.0136627	1
ENSG00000141644	MBD1	MBD1_HUMAN	Q9UIS9	A_23_P208090	0.328307	9.23915	4.4368	0.00042193	0.0137171	1
ENSG00000108312	UBTF	UBF1_HUMAN	P17480	A_23_P100779	-0.298571	8.83449	-4.43639	0.000422288	0.0137179	1
ENSG00000058091	CDK14	CDK14_HUMAN	O94921	A_23_P145889	-0.522746	8.97831	-4.43595	0.000422667	0.0137193	1
ENSG00000104763	ASAH1	ASAH1_HUMAN	Q13510	A_23_P216325	0.395852	9.40555	4.43317	0.000425097	0.0137873	1
ENSG00000119139	TJP2	ZO2_HUMAN	Q9UDY2	A_24_P201153	-0.315155	7.93166	-4.42977	0.000428092	0.013863	1
ENSG00000148180	GSN	GELS_HUMAN	P06396	A_23_P255884	0.5032	11.4224	4.42968	0.000428176	0.013863	1
ENSG00000271231	-	-	-	A_24_P686014	0.501493	12.1576	4.42938	0.000428442	0.013863	1
ENSG00000065361	ERBB3	ERBB3_HUMAN	P21860	A_23_P349416	-0.409891	9.42338	-4.42849	0.000429226	0.0138774	1
ENSG00000065361	c-erbB-3	ERBB3_HUMAN	P21860	A_23_P349416	-0.409891	9.42338	-4.42849	0.000429226	0.0138774	1
ENSG00000053438	NNAT	NNAT_HUMAN	Q16517	A_24_P382533	-0.366743	10.8628	-4.42773	0.000429904	0.0138884	1
ENSG00000166265	CYYR1	CYYR1_HUMAN	Q96J86	A_23_P17620	-0.478563	9.89827	-4.4257	0.000431709	0.0139358	1
ENSG00000101680	LAMA1	LAMA1_HUMAN	P25391	A_24_P100613	0.577768	8.84174	4.42432	0.000432938	0.0139494	1
ENSG00000155561	NUP205	NU205_HUMAN	Q92621	A_32_P51084	-0.270757	13.0695	-4.42409	0.00043315	0.0139494	1
ENSG00000035687	ADSS	PURA2_HUMAN	P30520	A_23_P859	-0.530491	9.44961	-4.42197	0.000435047	0.0139903	1
ENSG00000140416	TPM1	TPM1_HUMAN	P09493	A_23_P206018	-0.481556	13.5485	-4.42191	0.000435101	0.0139903	1
ENSG00000135248	FAM71F1	F71F1_HUMAN	Q96KD3	A_23_P134204	0.327787	12.1896	4.42132	0.000435633	0.0139965	1
ENSG00000148154	UGCG	CEGT_HUMAN	Q16739	A_23_P313389	-0.354061	10.2299	-4.42073	0.000436167	0.0140027	1
ENSG00000103888	CEMIP	CEMIP_HUMAN	Q8WUJ3	A_32_P161855	-0.401056	7.91322	-4.41789	0.00043873	0.0140739	1
ENSG00000130489	SCO2	SCO2_HUMAN	O43819	A_23_P91802	0.336898	9.14753	4.41735	0.000439218	0.0140786	1
ENSG00000025708	TYMP	TYPH_HUMAN	P19971	A_23_P91802	0.336898	9.14753	4.41735	0.000439218	0.0140786	1
ENSG00000133398	MED10	MED10_HUMAN	Q9BTT4	A_23_P124024	0.285188	9.19087	4.41576	0.000440659	0.0141138	1
ENSG00000223814	-	-	-	A_23_P336859	0.392789	10.5867	4.4146	0.000441718	0.0141367	1
ENSG00000269113	TRABD2B	TIKI2_HUMAN	A6NFA1	A_23_P336859	0.392789	10.5867	4.4146	0.000441718	0.0141367	1
ENSG00000089327	FXYD5	FXYD5_HUMAN	Q96DB9	A_23_P130995	-0.351932	10.3614	-4.41316	0.000443032	0.0141658	1
ENSG00000102753	KPNA3	IMA4_HUMAN	O00505	A_23_P139950	-0.284518	9.46546	-4.41285	0.000443317	0.0141658	1
ENSG00000119866	BCL11A	BC11A_HUMAN	Q9H165	A_23_P218584	-0.278654	7.45156	-4.41135	0.000444699	0.0141925	1
ENSG00000140835	CHST4	CHST4_HUMAN	Q8NCG5	A_23_P141035	-0.336349	8.76419	-4.41082	0.000445183	0.0141925	1
ENSG00000204472	AIF1	AIF1_HUMAN	P55008	A_23_P214627	-0.408352	8.59392	-4.41082	0.000445188	0.0141925	1
ENSG00000154537	FAM27A	FAM27_HUMAN	Q5VT28	A_32_P168727	0.407554	8.3091	4.40763	0.000448132	0.0142753	1
ENSG00000154537	FAM27B	FAM27_HUMAN	Q5VT28	A_32_P168727	0.407554	8.3091	4.40763	0.000448132	0.0142753	1
ENSG00000154537	FAM27C	FAM27_HUMAN	Q5VT28	A_32_P168727	0.407554	8.3091	4.40763	0.000448132	0.0142753	1
ENSG00000278763	-	-	-	A_32_P168727	0.407554	8.3091	4.40763	0.000448132	0.0142753	1
ENSG00000103005	USB1	USB1_HUMAN	Q9BQ65	A_24_P247987	0.364361	8.96131	4.40713	0.000448587	0.0142787	1
ENSG00000184205	TSPYL2	TSYL2_HUMAN	Q9H2G4	A_23_P158485	0.378119	10.4509	4.40558	0.000450032	0.0143136	1
ENSG00000196735	HLA-DQA1	DQA1_HUMAN	P01909	A_24_P196827	0.377274	8.05239	4.4043	0.00045122	0.0143403	1
ENSG00000184785	SMIM10	SIM10_HUMAN	Q96HG1	A_32_P48842	-0.300892	7.26537	-4.40203	0.000453341	0.0143908	1
ENSG00000147889	CDKN2A	CD2A1_HUMAN	P42771	A_23_P43490	0.351038	9.71091	4.40185	0.00045351	0.0143908	1
ENSG00000147889	CDKN2A	CD2A2_HUMAN	Q8N726	A_23_P43490	0.351038	9.71091	4.40185	0.00045351	0.0143908	1
ENSG00000010017	RANBP9	RANB9_HUMAN	Q96S59	A_23_P59268	0.314495	12.4878	4.39753	0.000457581	0.0144873	1
ENSG00000138771	SHROOM3	SHRM3_HUMAN	Q8TF72	A_23_P58117	-0.400375	10.6464	-4.3975	0.000457609	0.0144873	1
ENSG00000129534	MIS18BP1	M18BP_HUMAN	Q6P0N0	A_23_P106162	-0.318593	9.99277	-4.39711	0.000457978	0.0144878	1
ENSG00000009413	REV3L	DPOLZ_HUMAN	O60673	A_23_P214139	0.422386	9.52028	4.39674	0.000458329	0.0144878	1
ENSG00000087076	HSD17B14	DHB14_HUMAN	Q9BPX1	A_23_P78762	0.471589	9.15433	4.39417	0.000460768	0.0145537	1
ENSG00000242808	-	-	-	A_24_P756289	-0.322314	7.24342	-4.39373	0.000461194	0.0145559	1
ENSG00000183742	MACC1	MACC1_HUMAN	Q6ZN28	A_32_P131031	-0.344368	7.21795	-4.39203	0.000462818	0.014596	1
ENSG00000130433	CACNG6	CCG6_HUMAN	Q9BXT2	A_23_P501933	-0.359599	7.92936	-4.39046	0.000464318	0.0146288	1
ENSG00000214050	FBXO16	FBX16_HUMAN	Q8IX29	A_24_P128001	0.353193	11.5505	4.3902	0.000464569	0.0146288	1
ENSG00000186918	ZNF395	ZN395_HUMAN	Q9H8N7	A_24_P128001	0.353193	11.5505	4.3902	0.000464569	0.0146288	1
ENSG00000189002	-	-	-	A_23_P73114	0.482574	8.58145	4.38978	0.000464971	0.0146302	1
ENSG00000184500	PROS1	PROS_HUMAN	P07225	A_23_P73114	0.482574	8.58145	4.38978	0.000464971	0.0146302	1
ENSG00000161652	IZUMO2	IZUM2_HUMAN	Q6UXV1	A_23_P101521	-0.334683	7.85729	-4.38694	0.000467713	0.0147052	1
ENSG00000068650	ATP11A	AT11A_HUMAN	P98196	A_24_P161973	0.322122	11.3437	4.38324	0.000471305	0.0148013	1
ENSG00000214357	NEURL1B	NEU1B_HUMAN	A8MQ27	A_32_P198731	-0.573443	8.82711	-4.38231	0.000472213	0.0148013	1
ENSG00000139921	TMX1	TMX1_HUMAN	Q9H3N1	A_23_P76951	-0.336734	12.7278	-4.38215	0.000472365	0.0148013	1
ENSG00000134318	ROCK2	ROCK2_HUMAN	O75116	A_24_P328333	-0.303928	8.07292	-4.38177	0.000472737	0.0148013	1
ENSG00000136068	FLNB	FLNB_HUMAN	O75369	A_23_P211878	0.512475	12.783	4.38176	0.00047275	0.0148013	1
ENSG00000177311	ZBTB38	ZBT38_HUMAN	Q8NAP3	A_23_P212025	0.274599	9.96673	4.38121	0.000473289	0.0148013	1
ENSG00000106077	ABHD11	ABHDB_HUMAN	Q8NFV4	A_23_P315933	0.50181	13.1179	4.38063	0.000473852	0.0148076	1
ENSG00000106341	PPP1R17	PPR17_HUMAN	O96001	A_23_P145724	-0.506031	8.17111	-4.37885	0.000475608	0.0148512	1
ENSG00000109654	TRIM2	TRIM2_HUMAN	Q9C040	A_24_P208909	0.391079	10.5643	4.37657	0.000477858	0.0149058	1
ENSG00000165861	ZFYVE1	ZFYV1_HUMAN	Q9HBF4	A_23_P128956	0.280923	10.1401	4.37634	0.000478081	0.0149058	1
ENSG00000166165	CKB	KCRB_HUMAN	P12277	A_23_P25674	0.442193	12.5916	4.3756	0.000478809	0.0149171	1
ENSG00000245694	-	-	-	A_32_P104063	0.387729	11.341	4.37357	0.00048083	0.0149687	1
ENSG00000157985	AGAP1	AGAP1_HUMAN	Q9UPQ3	A_23_P108404	-0.348966	9.69459	-4.37265	0.000481747	0.0149859	1
ENSG00000110721	CHKA	CHKA_HUMAN	P35790	A_23_P124742	-0.363054	11.3386	-4.3717	0.000482696	0.0150041	1
ENSG00000122861	PLAU	UROK_HUMAN	P00749	A_23_P24104	-0.460983	11.0922	-4.37093	0.000483465	0.0150167	1
ENSG00000159176	CSRP1	CSRP1_HUMAN	P21291	A_24_P225448	-0.39808	7.54269	-4.37002	0.000484377	0.0150242	1
ENSG00000251191	-	-	-	A_24_P333532	-0.27922	6.98439	-4.36995	0.00048444	0.0150242	1
ENSG00000182095	TNRC18	TNC18_HUMAN	O15417	A_23_P377434	0.301573	11.1088	4.36934	0.000485062	0.0150261	1
ENSG00000130045	NXNL2	NXNL2_HUMAN	Q5VZ03	A_23_P169319	-0.398215	7.46577	-4.36917	0.00048523	0.0150261	1
ENSG00000150625	GPM6A	GPM6A_HUMAN	P51674	A_23_P121545	-0.320538	8.3309	-4.36651	0.000487907	0.0150939	1
ENSG00000087250	MT3	MT3_HUMAN	P25713	A_23_P315273	0.356345	7.83715	4.36555	0.000488877	0.0150939	1
ENSG00000144381	HSPD1	CH60_HUMAN	P10809	A_32_P76091	-0.58296	11.3562	-4.36526	0.000489169	0.0150939	1
ENSG00000185155	MIXL1	MIXL1_HUMAN	Q9H2W2	A_23_P11739	-1.16278	9.94873	-4.36518	0.000489249	0.0150939	1
ENSG00000110958	PTGES3	TEBP_HUMAN	Q15185	A_24_P343869	-0.364676	11.7662	-4.36517	0.000489259	0.0150939	1
ENSG00000181788	SIAH2	SIAH2_HUMAN	O43255	A_23_P69121	-0.367374	9.59663	-4.3648	0.000489636	0.0150942	1
ENSG00000157021	-	-	-	A_32_P176675	0.353855	9.21444	4.36285	0.000491619	0.015144	1
ENSG00000231909	-	-	-	A_24_P58037	0.336844	9.41518	4.35777	0.000496812	0.015281	1
ENSG00000138443	ABI2	ABI2_HUMAN	Q9NYB9	A_24_P933418	-0.329359	9.93883	-4.35725	0.000497353	0.0152863	1
ENSG00000105971	CAV2	CAV2_HUMAN	P51636	A_23_P123071	-0.614983	8.93645	-4.35678	0.000497834	0.0152896	1
ENSG00000124493	GRM4	GRM4_HUMAN	Q14833	A_23_P70588	-0.294699	7.37745	-4.35578	0.000498863	0.0153098	1
ENSG00000168297	PXK	PXK_HUMAN	Q7Z7A4	A_24_P140204	0.276443	8.29446	4.35465	0.000500038	0.0153344	1
ENSG00000214190	-	-	-	A_24_P333077	0.305335	8.09497	4.35266	0.000502097	0.0153808	1
ENSG00000226887	ERVMER34-1	MER34_HUMAN	Q9H9K5	A_23_P92583	-0.491074	8.2578	-4.35246	0.000502309	0.0153808	1
ENSG00000105655	ISYNA1	INO1_HUMAN	Q9NPH2	A_23_P5131	-0.358035	12.007	-4.35211	0.000502674	0.0153808	1
ENSG00000180957	PITPNB	PIPNB_HUMAN	P48739	A_23_P17786	-0.394436	10.0875	-4.35143	0.000503378	0.0153866	1
ENSG00000137872	SEMA6D	SEM6D_HUMAN	Q8NFY4	A_23_P420442	0.507248	10.1619	4.35121	0.000503614	0.0153866	1
ENSG00000085840	ORC1	ORC1_HUMAN	Q13415	A_23_P45799	-0.328279	9.01251	-4.34965	0.000505241	0.0154249	1
ENSG00000122641	INHBA	INHBA_HUMAN	P08476	A_23_P122924	-0.382875	7.57794	-4.34653	0.000508512	0.0155132	1
ENSG00000111845	PAK1IP1	PK1IP_HUMAN	Q9NWT1	A_23_P122674	-0.40375	10.082	-4.34239	0.000512891	0.0156352	1
ENSG00000166501	PRKCB	KPCB_HUMAN	P05771	A_23_P206585	-0.426745	7.79785	-4.34177	0.000513556	0.0156427	1
ENSG00000171174	RBKS	RBSK_HUMAN	Q9H477	A_23_P9523	0.354207	10.0712	4.34145	0.0005139	0.0156427	1
ENSG00000092964	DPYSL2	DPYL2_HUMAN	Q16555	A_24_P38347	-0.443297	10.6724	-4.34033	0.000515085	0.0156672	1
ENSG00000075945	KIFAP3	KIFA3_HUMAN	Q92845	A_23_P62920	0.277951	10.0075	4.3384	0.000517155	0.0157185	1
ENSG00000186153	WWOX	WWOX_HUMAN	Q9NZC7	A_23_P83368	0.455729	10.6686	4.33713	0.00051852	0.0157484	1
ENSG00000168610	STAT3	STAT3_HUMAN	P40763	A_24_P116805	-0.276732	8.05919	-4.33612	0.000519607	0.0157697	1
ENSG00000230067	-	-	-	A_32_P514599	-0.520669	11.9745	-4.3344	0.000521453	0.0158141	1
ENSG00000198815	FOXJ3	FOXJ3_HUMAN	Q9UPW0	A_23_P566	0.302825	12.0464	4.33352	0.000522407	0.0158185	1
ENSG00000039523	FAM65A	FA65A_HUMAN	Q6ZS17	A_32_P230868	0.434137	11.1301	4.33302	0.000522949	0.0158185	1
ENSG00000169905	TOR1AIP2	IFG15_HUMAN	Q9H496	A_24_P839239	0.365275	10.5028	4.33268	0.000523316	0.0158185	1
ENSG00000169905	TOR1AIP2	TOIP2_HUMAN	Q8NFQ8	A_24_P839239	0.365275	10.5028	4.33268	0.000523316	0.0158185	1
ENSG00000138032	PPM1B	PPM1B_HUMAN	O75688	A_23_P398073	-0.38175	10.4621	-4.33257	0.000523438	0.0158185	1
ENSG00000198502	HLA-DRB5	DRB5_HUMAN	Q30154	A_23_P45099	0.420198	9.088	4.33244	0.000523585	0.0158185	1
ENSG00000185909	KLHDC8B	KLD8B_HUMAN	Q8IXV7	A_24_P148836	0.38759	9.36626	4.33196	0.000524098	0.0158185	1
ENSG00000169045	HNRNPH1	HNRH1_HUMAN	P31943	A_24_P337380	-0.399853	10.9681	-4.33178	0.000524295	0.0158185	1
ENSG00000164048	ZNF589	ZN589_HUMAN	Q86UQ0	A_23_P110031	-0.301423	10.2454	-4.33065	0.000525527	0.0158441	1
ENSG00000136541	ERMN	ERMIN_HUMAN	Q8TAM6	A_24_P276873	0.406044	7.38591	4.33001	0.000526221	0.0158534	1
ENSG00000143067	ZNF697	ZN697_HUMAN	Q5TEC3	A_32_P19716	-0.415716	9.79161	-4.32815	0.000528257	0.0159031	1
ENSG00000089902	RCOR1	RCOR1_HUMAN	Q9UKL0	A_24_P87257	-0.294903	7.24912	-4.32612	0.000530487	0.0159496	1
ENSG00000105205	CLC	LEG10_HUMAN	Q05315	A_23_P101683	-0.616149	10.0038	-4.32603	0.000530578	0.0159496	1
ENSG00000170425	ADORA2B	AA2BR_HUMAN	P29275	A_23_P55477	-0.320929	8.28856	-4.32445	0.00053232	0.0159902	1
ENSG00000215301	DDX3X	DDX3X_HUMAN	O00571	A_23_P317657	-0.331845	10.5234	-4.32248	0.000534504	0.0160424	1
ENSG00000085063	CD59	CD59_HUMAN	P13987	A_24_P141481	0.347642	11.9816	4.32218	0.000534839	0.0160424	1
ENSG00000055044	NOP58	NOP58_HUMAN	Q9Y2X3	A_23_P154447	-0.366395	13.3131	-4.32071	0.000536467	0.0160795	1
ENSG00000125630	POLR1B	RPA2_HUMAN	Q9H9Y6	A_23_P209987	-0.390659	9.90929	-4.32003	0.000537221	0.0160904	1
ENSG00000177427	MIEF2	MID49_HUMAN	Q96C03	A_23_P501372	0.308993	10.3554	4.31908	0.00053828	0.0161104	1
ENSG00000137309	HMGA1	HMGA1_HUMAN	P17096	A_23_P42331	-0.291071	15.2086	-4.3178	0.000539712	0.0161357	1
ENSG00000233440	-	-	-	A_23_P42331	-0.291071	15.2086	-4.3178	0.000539712	0.0161357	1
ENSG00000050165	DKK3	DKK3_HUMAN	Q9UBP4	A_23_P162047	0.304134	13.756	4.31762	0.000539913	0.0161357	1
ENSG00000255128	-	-	-	A_24_P736638	-0.398941	13.4234	-4.31684	0.00054079	0.0161502	1
ENSG00000254543	-	-	-	A_24_P736638	-0.398941	13.4234	-4.31684	0.00054079	0.0161502	1
ENSG00000236816	-	-	-	A_24_P64241	0.326531	7.16722	4.31634	0.000541346	0.0161551	1
ENSG00000229089	-	-	-	A_24_P64241	0.326531	7.16722	4.31634	0.000541346	0.0161551	1
ENSG00000260691	ANKRD20A1	A20A1_HUMAN	Q5TYW2	A_24_P64241	0.326531	7.16722	4.31634	0.000541346	0.0161551	1
ENSG00000183148	ANKRD20A2	A20A2_HUMAN	Q5SQ80	A_24_P64241	0.326531	7.16722	4.31634	0.000541346	0.0161551	1
ENSG00000172014	ANKRD20A4	A20A4_HUMAN	Q4UJ75	A_24_P64241	0.326531	7.16722	4.31634	0.000541346	0.0161551	1
ENSG00000276203	ANKRD20A3	A20A3_HUMAN	Q5VUR7	A_24_P64241	0.326531	7.16722	4.31634	0.000541346	0.0161551	1
ENSG00000110090	CPT1A	CPT1A_HUMAN	P50416	A_24_P347065	-0.37307	7.71574	-4.31533	0.000542486	0.0161734	1
ENSG00000135423	GLS2	GLSL_HUMAN	Q9UI32	A_24_P326739	-0.443356	7.95692	-4.3151	0.000542749	0.0161734	1
ENSG00000180537	RNF182	RN182_HUMAN	Q8N6D2	A_23_P399255	-0.441108	9.97119	-4.31474	0.000543156	0.0161738	1
ENSG00000132561	MATN2	MATN2_HUMAN	O00339	A_23_P71328	-0.522832	8.49422	-4.31316	0.000544935	0.0162076	1
ENSG00000133475	GGT2	GGT2_HUMAN	P36268	A_24_P83848	0.302163	8.32052	4.31303	0.000545078	0.0162076	1
ENSG00000174628	IQCK	IQCK_HUMAN	Q8N0W5	A_23_P324523	0.390993	10.2943	4.31107	0.000547296	0.0162601	1
ENSG00000123685	BATF3	BATF3_HUMAN	Q9NR55	A_23_P160720	-0.427561	10.4078	-4.31078	0.000547635	0.0162601	1
ENSG00000274641	HIST1H2BO	H2B1O_HUMAN	P23527	A_23_P59069	-0.319077	12.675	-4.30946	0.00054913	0.0162927	1
ENSG00000164362	TERT	TERT_HUMAN	O14746	A_23_P110851	-0.326867	9.31294	-4.30882	0.000549861	0.0163026	1
ENSG00000124766	SOX4	SOX4_HUMAN	Q06945	A_23_P82169	-0.390796	14.5985	-4.30833	0.000550421	0.0163075	1
ENSG00000197408	CYP2B6	CP2B6_HUMAN	P20813	A_24_P339514	-0.495104	8.16957	-4.30772	0.000551119	0.0163164	1
ENSG00000256612	-	-	-	A_24_P339514	-0.495104	8.16957	-4.30772	0.000551119	0.0163164	1
ENSG00000149557	FEZ1	FEZ1_HUMAN	Q99689	A_23_P202881	-0.350903	10.0315	-4.30704	0.000551901	0.0163221	1
ENSG00000279332	-	-	-	A_24_P85619	-0.329526	7.43453	-4.30403	0.000555347	0.0163998	1
ENSG00000123505	AMD1	DCAM_HUMAN	P17707	A_23_P214121	-0.383201	11.2195	-4.30387	0.000555533	0.0163998	1
ENSG00000145907	G3BP1	G3BP1_HUMAN	Q13283	A_23_P336479	-0.310013	13.6334	-4.30317	0.000556345	0.016412	1
ENSG00000159842	ABR	ABR_HUMAN	Q12979	A_23_P503182	0.332491	12.0927	4.30277	0.000556804	0.0164137	1
ENSG00000196369	SRGAP2B	SRG2B_HUMAN	P0DMP2	A_32_P33913	0.391606	10.1885	4.29936	0.00056076	0.0165185	1
ENSG00000124466	LYPD3	LYPD3_HUMAN	O95274	A_23_P39265	-0.39759	8.76606	-4.29889	0.000561306	0.0165213	1
ENSG00000177707	PVRL3	PVRL3_HUMAN	Q9NQS3	A_23_P80763	-0.583764	8.65055	-4.2985	0.000561767	0.0165213	1
ENSG00000106415	GLCCI1	GLCI1_HUMAN	Q86VQ1	A_23_P336198	0.338511	11.3139	4.29824	0.000562061	0.0165213	1
ENSG00000186469	GNG2	GBG2_HUMAN	P59768	A_23_P32536	0.267495	7.7523	4.29768	0.000562717	0.0165288	1
ENSG00000047346	FAM214A	F214A_HUMAN	Q32MH5	A_24_P357576	0.390828	10.5573	4.29529	0.000565515	0.0165991	1
ENSG00000162374	ELAVL4	ELAV4_HUMAN	P26378	A_24_P188447	0.300676	7.84993	4.29482	0.00056607	0.0166035	1
ENSG00000259489	-	-	-	A_24_P332595	0.498996	8.55988	4.29402	0.000567009	0.0166076	1
ENSG00000221988	PPT2	PPT2_HUMAN	Q9UMR5	A_23_P42116	0.445486	12.7971	4.29367	0.000567423	0.0166076	1
ENSG00000148660	CAMK2G	KCC2G_HUMAN	Q13555	A_24_P141332	0.321136	10.4155	4.29279	0.000568453	0.0166259	1
ENSG00000188112	C6orf132	CF132_HUMAN	Q5T0Z8	A_32_P218355	-0.419134	10.1848	-4.2897	0.000572112	0.0167092	1
ENSG00000259917	-	-	-	A_24_P42122	-0.318965	11.2956	-4.2897	0.000572113	0.0167092	1
ENSG00000268083	-	-	-	A_24_P42122	-0.318965	11.2956	-4.2897	0.000572113	0.0167092	1
ENSG00000104824	HNRNPL	HNRPL_HUMAN	P14866	A_24_P42122	-0.318965	11.2956	-4.2897	0.000572113	0.0167092	1
ENSG00000130363	RSPH3	RSPH3_HUMAN	Q86UC2	A_23_P59397	0.289534	8.76571	4.28779	0.000574385	0.0167636	1
ENSG00000140848	CPNE2	CPNE2_HUMAN	Q96FN4	A_23_P37988	0.407618	9.68199	4.28684	0.000575519	0.0167739	1
ENSG00000151150	ANK3	ANK3_HUMAN	Q12955	A_23_P202269	-0.345995	11.695	-4.2867	0.000575689	0.0167739	1
ENSG00000185973	TMLHE	TMLH_HUMAN	Q9NVH6	A_23_P62335	0.283746	8.50547	4.28629	0.000576185	0.0167739	1
ENSG00000099385	BCL7C	BCL7C_HUMAN	Q8WUZ0	A_23_P118289	0.376158	11.7515	4.28466	0.000578135	0.0167929	1
ENSG00000164542	KIAA0895	K0895_HUMAN	Q8NCT3	A_23_P305205	0.406013	7.75932	4.28456	0.000578249	0.0167929	1
ENSG00000173404	INSM1	INSM1_HUMAN	Q01101	A_23_P109184	0.565201	7.27544	4.28368	0.00057931	0.0168058	1
ENSG00000198707	CEP290	CE290_HUMAN	O15078	A_24_P51067	-0.286618	7.51546	-4.28118	0.000582322	0.0168714	1
ENSG00000103811	CTSH	CATH_HUMAN	P09668	A_23_P14774	0.393034	10.9331	4.28096	0.000582594	0.0168714	1
ENSG00000168411	RFWD3	RFWD3_HUMAN	Q6PCD5	A_24_P287826	-0.297514	10.3112	-4.28014	0.000583589	0.0168883	1
ENSG00000154188	ANGPT1	ANGP1_HUMAN	Q15389	A_23_P216023	-0.409936	8.97626	-4.2777	0.000586548	0.016962	1
ENSG00000172346	CSDC2	CSDC2_HUMAN	Q9Y534	A_24_P177279	-0.345519	7.45557	-4.27493	0.000589937	0.0170263	1
ENSG00000179029	TMEM107	TM107_HUMAN	Q6UX40	A_24_P284353	0.359255	11.9138	4.27479	0.000590101	0.0170263	1
ENSG00000121775	TMEM39B	TM39B_HUMAN	Q9GZU3	A_23_P34496	-0.319615	10.4693	-4.27453	0.000590429	0.0170263	1
ENSG00000156804	FBXO32	FBX32_HUMAN	Q969P5	A_24_P918147	-0.332821	7.35145	-4.27368	0.000591465	0.0170442	1
ENSG00000147119	CHST7	CHST7_HUMAN	Q9NS84	A_23_P319617	-0.432297	9.63754	-4.27313	0.000592144	0.0170496	1
ENSG00000106554	CHCHD3	MIC19_HUMAN	Q9NX63	A_23_P251927	-0.414515	11.3475	-4.27285	0.000592482	0.0170496	1
ENSG00000131831	RAI2	RAI2_HUMAN	Q9Y5P3	A_23_P254165	0.367352	8.98448	4.27162	0.000594007	0.0170696	1
ENSG00000000971	CFH	CFAH_HUMAN	P08603	A_23_P200160	-0.474104	6.88355	-4.26974	0.000596327	0.0171018	1
ENSG00000124260	MAGEA10	MAGAA_HUMAN	P43363	A_32_P17253	-0.330535	7.05073	-4.2695	0.000596627	0.0171018	1
ENSG00000107731	UNC5B	UNC5B_HUMAN	Q8IZJ1	A_23_P52336	-0.501548	9.56744	-4.26948	0.000596646	0.0171018	1
ENSG00000000005	TNMD	TNMD_HUMAN	Q9H2S6	A_23_P125588	-0.335634	7.4064	-4.26924	0.000596945	0.0171018	1
ENSG00000185262	UBALD2	UBAD2_HUMAN	Q8IYN6	A_24_P194714	0.33615	12.7841	4.26903	0.00059721	0.0171018	1
ENSG00000273542	HIST1H4A	H4_HUMAN	P62805	A_23_P30813	-0.540512	12.599	-4.26713	0.000599569	0.0171455	1
ENSG00000273542	HIST1H4B	H4_HUMAN	P62805	A_23_P30813	-0.540512	12.599	-4.26713	0.000599569	0.0171455	1
ENSG00000273542	HIST1H4C	H4_HUMAN	P62805	A_23_P30813	-0.540512	12.599	-4.26713	0.000599569	0.0171455	1
ENSG00000273542	HIST1H4D	H4_HUMAN	P62805	A_23_P30813	-0.540512	12.599	-4.26713	0.000599569	0.0171455	1
ENSG00000273542	HIST1H4E	H4_HUMAN	P62805	A_23_P30813	-0.540512	12.599	-4.26713	0.000599569	0.0171455	1
ENSG00000273542	HIST1H4F	H4_HUMAN	P62805	A_23_P30813	-0.540512	12.599	-4.26713	0.000599569	0.0171455	1
ENSG00000273542	HIST1H4H	H4_HUMAN	P62805	A_23_P30813	-0.540512	12.599	-4.26713	0.000599569	0.0171455	1
ENSG00000273542	HIST1H4I	H4_HUMAN	P62805	A_23_P30813	-0.540512	12.599	-4.26713	0.000599569	0.0171455	1
ENSG00000273542	HIST1H4J	H4_HUMAN	P62805	A_23_P30813	-0.540512	12.599	-4.26713	0.000599569	0.0171455	1
ENSG00000273542	HIST1H4K	H4_HUMAN	P62805	A_23_P30813	-0.540512	12.599	-4.26713	0.000599569	0.0171455	1
ENSG00000273542	HIST1H4L	H4_HUMAN	P62805	A_23_P30813	-0.540512	12.599	-4.26713	0.000599569	0.0171455	1
ENSG00000273542	HIST2H4A	H4_HUMAN	P62805	A_23_P30813	-0.540512	12.599	-4.26713	0.000599569	0.0171455	1
ENSG00000273542	HIST2H4B	H4_HUMAN	P62805	A_23_P30813	-0.540512	12.599	-4.26713	0.000599569	0.0171455	1
ENSG00000273542	HIST4H4	H4_HUMAN	P62805	A_23_P30813	-0.540512	12.599	-4.26713	0.000599569	0.0171455	1
ENSG00000105643	ARRDC2	ARRD2_HUMAN	Q8TBH0	A_23_P130965	0.352594	9.1628	4.26515	0.000602041	0.0171923	1
ENSG00000055950	MRPL43	RM43_HUMAN	Q8N983	A_23_P382154	0.282209	8.63753	4.26141	0.000606732	0.017307	1
ENSG00000274211	SOCS7	SOCS7_HUMAN	O14512	A_32_P43711	-0.284559	7.38368	-4.26128	0.000606902	0.017307	1
ENSG00000160584	SIK3	SIK3_HUMAN	Q9Y2K2	A_24_P329924	0.379	9.24884	4.25919	0.000609541	0.0173702	1
ENSG00000176826	-	-	-	A_23_P376211	0.35906	11.8601	4.25827	0.000610712	0.0173915	1
ENSG00000122642	FKBP9	FKBP9_HUMAN	O95302	A_23_P376211	0.35906	11.8601	4.25827	0.000610712	0.0173915	1
ENSG00000145390	USP53	UBP53_HUMAN	Q70EK8	A_32_P128701	-0.48435	9.87485	-4.2557	0.000613978	0.0174679	1
ENSG00000204072	-	-	-	A_32_P104460	0.28513	12.0666	4.25549	0.000614245	0.0174679	1
ENSG00000198960	ARMCX6	ARMX6_HUMAN	Q7L4S7	A_32_P104460	0.28513	12.0666	4.25549	0.000614245	0.0174679	1
ENSG00000110315	RNF141	RN141_HUMAN	Q8WVD5	A_23_P139066	0.314501	10.5213	4.25486	0.000615052	0.0174788	1
ENSG00000224557	-	-	-	A_24_P288836	0.326192	8.52732	4.253	0.00061744	0.0175215	1
ENSG00000142192	APP	A4_HUMAN	P05067	A_24_P314159	-0.336002	11.2357	-4.2527	0.000617817	0.0175215	1
ENSG00000118137	APOA1	APOA1_HUMAN	P02647	A_23_P203191	0.834461	10.4731	4.25251	0.000618059	0.0175215	1
ENSG00000171310	CHST11	CHSTB_HUMAN	Q9NPF2	A_23_P139919	0.311288	9.75432	4.25213	0.000618549	0.0175215	1
ENSG00000111245	MYL2	MLRV_HUMAN	P10916	A_23_P162547	0.368774	7.90724	4.25203	0.000618686	0.0175215	1
ENSG00000099139	PCSK5	PCSK5_HUMAN	Q92824	A_24_P355246	-0.46047	8.02393	-4.25023	0.000620999	0.0175749	1
ENSG00000140945	CDH13	CAD13_HUMAN	P55290	A_32_P85999	0.432455	8.9392	4.24954	0.000621897	0.0175882	1
ENSG00000142864	SERBP1	PAIRB_HUMAN	Q8NC51	A_32_P187599	-0.376283	13.8821	-4.24805	0.000623817	0.0176303	1
ENSG00000249565	-	-	-	A_32_P187599	-0.376283	13.8821	-4.24805	0.000623817	0.0176303	1
ENSG00000143952	VPS54	VPS54_HUMAN	Q9P1Q0	A_23_P131737	0.388691	10.1203	4.24695	0.00062525	0.0176587	1
ENSG00000004948	CALCR	CALCR_HUMAN	P30988	A_23_P134484	0.348119	11.1306	4.24608	0.000626379	0.0176784	1
ENSG00000180828	BHLHE22	BHE22_HUMAN	Q8NFJ8	A_23_P402194	0.390327	8.07279	4.24501	0.000627779	0.0177058	1
ENSG00000187867	PALM3	PALM3_HUMAN	A6NDB9	A_32_P198177	-0.737748	8.68683	-4.24405	0.00062903	0.0177289	1
ENSG00000168398	BDKRB2	BKRB2_HUMAN	P30411	A_23_P304897	-0.549568	10.2149	-4.24149	0.000632386	0.0178113	1
ENSG00000149948	HMGA2	HMGA2_HUMAN	P52926	A_23_P95930	0.300868	12.8127	4.2409	0.000633162	0.0178209	1
ENSG00000042286	AIFM2	AIFM2_HUMAN	Q9BRQ8	A_32_P75094	0.306374	9.14182	4.23754	0.000637597	0.0179335	1
ENSG00000151967	SCHIP1	SCHI1_HUMAN	Q9P0W5	A_32_P62863	-0.435438	10.712	-4.23578	0.000639943	0.0179748	1
ENSG00000250588	IQCJ-SCHIP1	-	-	A_32_P62863	-0.435438	10.712	-4.23578	0.000639943	0.0179748	1
ENSG00000111412	C12orf49	CL049_HUMAN	Q9H741	A_24_P715924	0.282711	10.5967	4.23492	0.000641089	0.0179947	1
ENSG00000061936	SFSWAP	SFSWA_HUMAN	Q12872	A_32_P109704	-0.300278	10.2192	-4.23458	0.000641547	0.0179953	1
ENSG00000183145	RIPPLY3	DSCR6_HUMAN	P57055	A_23_P109320	0.718827	10.7759	4.23401	0.000642296	0.018004	1
ENSG00000073060	SCARB1	SCRB1_HUMAN	Q8WTV0	A_23_P203900	-0.321643	13.1307	-4.23302	0.000643622	0.0180289	1
ENSG00000213625	LEPROT	OBRG_HUMAN	O15243	A_23_P1126	-0.356631	12.2536	-4.23209	0.000644875	0.0180309	1
ENSG00000011422	PLAUR	UPAR_HUMAN	Q03405	A_23_P16469	0.344153	10.9271	4.23178	0.00064529	0.0180309	1
ENSG00000171471	MAP1LC3B2	MP3B2_HUMAN	A6NCE7	A_32_P220715	0.310457	11.9023	4.23176	0.000645317	0.0180309	1
ENSG00000099994	SUSD2	SUSD2_HUMAN	Q9UGT4	A_23_P314101	-0.347633	7.48517	-4.23065	0.000646807	0.0180472	1
ENSG00000171119	NRTN	NRTN_HUMAN	Q99748	A_23_P90359	-0.363075	8.58331	-4.23057	0.000646913	0.0180472	1
ENSG00000164985	PSIP1	PSIP1_HUMAN	O75475	A_32_P22702	-0.543365	10.9083	-4.22845	0.000649775	0.0181129	1
ENSG00000006606	CCL26	CCL26_HUMAN	Q9Y258	A_24_P12573	-0.351552	7.71676	-4.22817	0.000650147	0.0181129	1
ENSG00000095209	TMEM38B	TM38B_HUMAN	Q9NVV0	A_23_P60259	0.349688	8.76281	4.2263	0.000652681	0.0181712	1
ENSG00000279393	-	-	-	A_32_P35433	-0.513119	8.9498	-4.22597	0.00065314	0.0181716	1
ENSG00000117139	KDM5B	KDM5B_HUMAN	Q9UGL1	A_23_P1038	-0.563486	10.2294	-4.22558	0.000653665	0.0181739	1
ENSG00000171492	LRRC8D	LRC8D_HUMAN	Q7L1W4	A_23_P97365	-0.366273	10.4437	-4.22493	0.000654551	0.0181769	1
ENSG00000013288	MAN2B2	MA2B2_HUMAN	Q9Y2E5	A_23_P250380	0.303185	7.93871	4.22485	0.000654656	0.0181769	1
ENSG00000133106	EPSTI1	ESIP1_HUMAN	Q96J88	A_23_P105794	0.413891	9.01509	4.2238	0.000656096	0.0182045	1
ENSG00000100003	SEC14L2	S14L2_HUMAN	O76054	A_23_P17811	0.451647	8.01567	4.22329	0.000656793	0.0182116	1
ENSG00000119139	TJP2	ZO2_HUMAN	Q9UDY2	A_23_P9293	-0.502211	11.8204	-4.22254	0.000657814	0.0182175	1
ENSG00000179604	CDC42EP4	BORG4_HUMAN	Q9H3Q1	A_24_P19054	0.312537	11.7501	4.22248	0.000657894	0.0182175	1
ENSG00000010292	NCAPD2	CND1_HUMAN	Q15021	A_23_P25293	-0.428619	11.5304	-4.22117	0.000659691	0.018255	1
ENSG00000166780	C16orf45	CP045_HUMAN	Q96MC5	A_23_P326319	-0.311623	9.59596	-4.22081	0.000660181	0.0182563	1
ENSG00000079459	FDFT1	FDFT_HUMAN	P37268	A_23_P71319	-0.478392	13.1225	-4.21977	0.000661608	0.0182793	1
ENSG00000198673	FAM19A2	F19A2_HUMAN	Q8N3H0	A_24_P297551	0.677363	7.89367	4.21956	0.000661902	0.0182793	1
ENSG00000140743	CDR2	CDR2_HUMAN	Q01850	A_23_P14957	-0.449778	10.8854	-4.21909	0.000662557	0.0182851	1
ENSG00000119457	SLC46A2	TSCOT_HUMAN	Q9BY10	A_23_P31996	0.366653	6.8962	4.21843	0.000663468	0.0182979	1
ENSG00000259020	-	-	-	A_23_P151066	-0.611883	14.3308	-4.21526	0.000667859	0.0184067	1
ENSG00000041802	LSG1	LSG1_HUMAN	Q9H089	A_24_P148657	-0.384478	9.45658	-4.21486	0.000668407	0.0184094	1
ENSG00000088305	DNMT3B	DNM3B_HUMAN	Q9UBC3	A_23_P28953	-0.427249	14.715	-4.213	0.000671001	0.0184685	1
ENSG00000128849	CGNL1	CGNL1_HUMAN	Q0VF96	A_23_P163306	0.364918	13.4562	4.21245	0.000671776	0.0184774	1
ENSG00000223960	-	-	-	A_24_P921264	0.28791	8.63247	4.21189	0.000672547	0.0184863	1
ENSG00000128567	PODXL	PODXL_HUMAN	O00592	A_23_P215060	0.331509	15.8256	4.21083	0.00067404	0.0185149	1
ENSG00000095637	SORBS1	SRBS1_HUMAN	Q9BX66	A_24_P317907	-0.374211	8.69652	-4.21006	0.000675116	0.0185321	1
ENSG00000253948	-	-	-	A_32_P144629	0.303687	8.56875	4.20842	0.000677435	0.0185642	1
ENSG00000261614	-	-	-	A_24_P625382	-0.489971	11.3066	-4.20827	0.000677642	0.0185642	1
ENSG00000085274	MYNN	MYNN_HUMAN	Q9NPC7	A_24_P260254	-0.382868	7.04366	-4.2076	0.000678591	0.0185778	1
ENSG00000167535	CACNB3	CACB3_HUMAN	P54284	A_23_P204016	0.383625	9.66825	4.20626	0.000680479	0.0186171	1
ENSG00000165591	FAAH2	FAAH2_HUMAN	Q6GMR7	A_23_P113471	-0.291283	9.26771	-4.20419	0.000683424	0.0186662	1
ENSG00000133958	UNC79	UNC79_HUMAN	Q9P2D8	A_32_P90009	0.518445	9.72522	4.20406	0.000683607	0.0186662	1
ENSG00000196323	ZBTB44	ZBT44_HUMAN	Q8NCP5	A_23_P202945	-0.308802	9.06653	-4.20404	0.000683636	0.0186662	1
ENSG00000173391	OLR1	OLR1_HUMAN	P78380	A_24_P124624	-0.424115	7.47403	-4.20081	0.000688249	0.0187509	1
ENSG00000120725	SIL1	SIL1_HUMAN	Q9H173	A_23_P252903	0.345672	10.2813	4.20059	0.000688563	0.0187509	1
ENSG00000096384	HSP90AB1	HS90B_HUMAN	P08238	A_24_P170295	-0.551634	12.7149	-4.19961	0.000689968	0.0187767	1
ENSG00000128059	PPAT	PUR1_HUMAN	Q06203	A_24_P123347	-0.302326	11.4762	-4.19538	0.000696074	0.0189052	1
ENSG00000124721	DNAH8	DYH8_HUMAN	Q96JB1	A_24_P926631	0.297142	7.02966	4.19507	0.000696528	0.0189052	1
ENSG00000179041	RRS1	RRS1_HUMAN	Q15050	A_23_P146187	-0.352521	10.9431	-4.1941	0.000697926	0.0189306	1
ENSG00000120860	CCDC53	CCD53_HUMAN	Q9Y3C0	A_23_P53567	0.28775	10.4188	4.19276	0.000699886	0.0189712	1
ENSG00000123213	NLN	NEUL_HUMAN	Q9BYT8	A_23_P133216	-0.314874	9.70511	-4.18966	0.000704412	0.0190814	1
ENSG00000169231	THBS3	TSP3_HUMAN	P49746	A_23_P201047	0.46768	9.58799	4.18933	0.000704905	0.0190821	1
ENSG00000129295	LRRC6	TILB_HUMAN	Q86X45	A_23_P112004	0.283756	8.41042	4.18887	0.000705569	0.0190847	1
ENSG00000006704	GTF2IRD1	GT2D1_HUMAN	Q9UHL9	A_23_P111621	0.27455	11.4624	4.18863	0.00070593	0.0190847	1
ENSG00000176148	TCP11L1	T11L1_HUMAN	Q9NUJ3	A_23_P47247	0.43027	10.4232	4.18743	0.000707695	0.0191199	1
ENSG00000131016	AKAP12	AKA12_HUMAN	Q02952	A_23_P214897	-0.689649	10.0575	-4.18552	0.000710516	0.0191835	1
ENSG00000122507	BBS9	PTHB1_HUMAN	Q3SYG4	A_23_P82351	-0.432794	12.0191	-4.18404	0.000712713	0.0192302	1
ENSG00000177707	PVRL3	PVRL3_HUMAN	Q9NQS3	A_23_P80759	-0.484811	8.6794	-4.18326	0.000713869	0.0192486	1
ENSG00000128203	ASPHD2	ASPH2_HUMAN	Q6ICH7	A_24_P245815	-0.32316	8.7384	-4.18263	0.000714803	0.0192486	1
ENSG00000009724	MASP2	MASP2_HUMAN	O00187	A_23_P301971	-0.260994	7.6636	-4.18145	0.000716565	0.0192834	1
ENSG00000168959	GRM5	GRM5_HUMAN	P41594	A_24_P83899	0.46593	7.03406	4.18085	0.000717462	0.0192856	1
ENSG00000257379	-	-	-	A_24_P349466	0.29555	8.97346	4.18077	0.000717584	0.0192856	1
ENSG00000205352	PRR13	PRR13_HUMAN	Q9NZ81	A_24_P349466	0.29555	8.97346	4.18077	0.000717584	0.0192856	1
ENSG00000187534	-	-	-	A_24_P349466	0.29555	8.97346	4.18077	0.000717584	0.0192856	1
ENSG00000160808	MYL3	MYL3_HUMAN	P08590	A_24_P131646	0.359587	7.65549	4.17958	0.00071936	0.0193062	1
ENSG00000204334	ERICH2	ERIC2_HUMAN	A1L162	A_32_P197340	0.331141	10.4337	4.17932	0.000719761	0.0193062	1
ENSG00000185052	SLC24A3	NCKX3_HUMAN	Q9HC58	A_23_P79978	0.297861	10.7155	4.17821	0.000721425	0.0193382	1
ENSG00000163811	WDR43	WDR43_HUMAN	Q15061	A_23_P344853	-0.323269	10.197	-4.17746	0.000722552	0.0193558	1
ENSG00000200174	-	-	-	A_23_P137484	-0.45493	15.6595	-4.17697	0.000723279	0.0193627	1
ENSG00000240563	L1TD1	LITD1_HUMAN	Q5T7N2	A_23_P137484	-0.45493	15.6595	-4.17697	0.000723279	0.0193627	1
ENSG00000164933	SLC25A32	MFTC_HUMAN	Q9H2D1	A_24_P69439	-0.361668	10.4982	-4.17608	0.000724622	0.0193844	1
ENSG00000005893	LAMP2	LAMP2_HUMAN	P13473	A_23_P217447	0.254192	8.96733	4.175	0.00072626	0.0194046	1
ENSG00000127946	HIP1	HIP1_HUMAN	O00291	A_23_P71033	-0.42676	9.916	-4.17371	0.000728213	0.0194441	1
ENSG00000127955	GNAI1	GNAI1_HUMAN	P63096	A_23_P122976	0.363376	9.1868	4.1731	0.000729151	0.0194565	1
ENSG00000008056	SYN1	SYN1_HUMAN	P17600	A_23_P33847	-0.30864	7.57108	-4.17266	0.000729805	0.0194613	1
ENSG00000143494	VASH2	VASH2_HUMAN	Q86V25	A_24_P85391	-0.373573	7.40759	-4.17095	0.000732422	0.0195184	1
ENSG00000135083	CCNJL	CCNJL_HUMAN	Q8IV13	A_23_P7684	-0.368275	8.73801	-4.16973	0.000734285	0.0195554	1
ENSG00000233962	-	-	-	A_24_P916547	0.317897	8.81952	4.16877	0.000735758	0.0195819	1
ENSG00000227018	-	-	-	A_23_P502470	0.289381	7.92455	4.16842	0.000736291	0.0195834	1
ENSG00000134352	IL6ST	IL6RB_HUMAN	P40189	A_23_P502470	0.289381	7.92455	4.16842	0.000736291	0.0195834	1
ENSG00000218336	TENM3	TEN3_HUMAN	Q9P273	A_24_P911420	-0.255911	9.27463	-4.16776	0.000737297	0.0195975	1
ENSG00000147100	SLC16A2	MOT8_HUMAN	P36021	A_23_P137097	-0.312524	9.70781	-4.16595	0.000740089	0.019659	1
ENSG00000131507	NDFIP1	NFIP1_HUMAN	Q9BT67	A_24_P209109	0.299657	10.3182	4.16468	0.000742058	0.0196986	1
ENSG00000115758	ODC1	DCOR_HUMAN	P11926	A_23_P165840	0.315814	14.4982	4.16382	0.000743385	0.0197166	1
ENSG00000092847	AGO1	AGO1_HUMAN	Q9UL18	A_23_P11764	-0.363432	10.8019	-4.1632	0.000744339	0.0197209	1
ENSG00000165732	DDX21	DDX21_HUMAN	Q9NR30	A_24_P415260	-0.297271	11.6938	-4.16273	0.000745073	0.0197246	1
ENSG00000119782	FKBP1B	FKB1B_HUMAN	P68106	A_23_P142631	-0.353021	12.316	-4.1625	0.000745439	0.0197246	1
ENSG00000205639	MFSD2B	MFS2B_HUMAN	A6NFX1	A_23_P142631	-0.353021	12.316	-4.1625	0.000745439	0.0197246	1
ENSG00000138604	GLCE	-	-	A_23_P151870	0.278513	8.15798	4.16185	0.000746443	0.0197276	1
ENSG00000166171	DPCD	DPCD_HUMAN	Q9BVM2	A_23_P52286	0.275684	11.3779	4.16181	0.000746511	0.0197276	1
ENSG00000185386	MAPK11	MK11_HUMAN	Q15759	A_23_P502274	0.428723	9.90538	4.16006	0.000749228	0.0197866	1
ENSG00000197933	ZNF823	ZN823_HUMAN	P16415	A_23_P39050	0.34728	8.80086	4.15885	0.000751121	0.0198143	1
ENSG00000142273	CBLC	CBLC_HUMAN	Q9ULV8	A_23_P397910	-0.370374	8.03808	-4.15878	0.000751238	0.0198143	1
ENSG00000273820	USP27X	UBP27_HUMAN	A6NNY8	A_24_P322908	0.264314	8.87986	4.15827	0.00075203	0.0198224	1
ENSG00000229089	-	-	-	A_24_P868583	0.365404	7.40674	4.15789	0.00075263	0.0198255	1
ENSG00000260691	ANKRD20A1	A20A1_HUMAN	Q5TYW2	A_24_P868583	0.365404	7.40674	4.15789	0.00075263	0.0198255	1
ENSG00000183148	ANKRD20A2	A20A2_HUMAN	Q5SQ80	A_24_P868583	0.365404	7.40674	4.15789	0.00075263	0.0198255	1
ENSG00000172014	ANKRD20A4	A20A4_HUMAN	Q4UJ75	A_24_P868583	0.365404	7.40674	4.15789	0.00075263	0.0198255	1
ENSG00000276203	ANKRD20A3	A20A3_HUMAN	Q5VUR7	A_24_P868583	0.365404	7.40674	4.15789	0.00075263	0.0198255	1
ENSG00000157191	NECAP2	NECP2_HUMAN	Q9NVZ3	A_23_P97296	0.26883	11.9436	4.15491	0.000757315	0.019917	1
ENSG00000135899	SP110	SP110_HUMAN	Q9HB58	A_23_P120002	-0.378756	7.93871	-4.15476	0.000757557	0.019917	1
ENSG00000164506	STXBP5	STXB5_HUMAN	Q5T5C0	A_23_P82047	0.412142	7.7819	4.15249	0.000761153	0.0199988	1
ENSG00000233608	-	-	-	A_23_P21324	-0.377065	7.75511	-4.15131	0.000763024	0.0200351	1
ENSG00000184489	PTP4A3	TP4A3_HUMAN	O75365	A_23_P112774	0.364311	8.95029	4.14802	0.000768275	0.0201361	1
ENSG00000205352	PRR13	PRR13_HUMAN	Q9NZ81	A_23_P139575	0.332341	15.1782	4.14795	0.000768401	0.0201361	1
ENSG00000187534	-	-	-	A_23_P139575	0.332341	15.1782	4.14795	0.000768401	0.0201361	1
ENSG00000116586	LAMTOR2	LTOR2_HUMAN	Q9Y2Q5	A_23_P103698	0.290709	12.8879	4.14768	0.000768831	0.0201361	1
ENSG00000248608	-	-	-	A_24_P418744	-0.335624	10.8485	-4.14599	0.000771547	0.0201944	1
ENSG00000162174	ASRGL1	ASGL1_HUMAN	Q7L266	A_23_P203392	0.276898	10.067	4.14503	0.000773087	0.0202163	1
ENSG00000118785	SPP1	OSTP_HUMAN	P10451	A_23_P7313	-1.1097	12.2622	-4.14486	0.000773368	0.0202163	1
ENSG00000020129	NCDN	NCDN_HUMAN	Q9UBB6	A_23_P97736	-0.28265	9.49584	-4.14432	0.000774227	0.0202254	1
ENSG00000243064	-	-	-	A_23_P166207	-0.306443	7.11142	-4.14403	0.000774702	0.0202254	1
ENSG00000166130	IKBIP	IKIP_HUMAN	Q70UQ0	A_23_P53467	0.273136	9.76754	4.14312	0.000776177	0.0202511	1
ENSG00000228963	-	-	-	A_32_P144953	0.299569	9.21813	4.1405	0.000780433	0.0203461	1
ENSG00000197061	HIST1H4A	H4_HUMAN	P62805	A_23_P214487	-0.32642	16.4141	-4.14027	0.000780808	0.0203461	1
ENSG00000197061	HIST1H4B	H4_HUMAN	P62805	A_23_P214487	-0.32642	16.4141	-4.14027	0.000780808	0.0203461	1
ENSG00000197061	HIST1H4C	H4_HUMAN	P62805	A_23_P214487	-0.32642	16.4141	-4.14027	0.000780808	0.0203461	1
ENSG00000197061	HIST1H4D	H4_HUMAN	P62805	A_23_P214487	-0.32642	16.4141	-4.14027	0.000780808	0.0203461	1
ENSG00000197061	HIST1H4E	H4_HUMAN	P62805	A_23_P214487	-0.32642	16.4141	-4.14027	0.000780808	0.0203461	1
ENSG00000197061	HIST1H4F	H4_HUMAN	P62805	A_23_P214487	-0.32642	16.4141	-4.14027	0.000780808	0.0203461	1
ENSG00000197061	HIST1H4H	H4_HUMAN	P62805	A_23_P214487	-0.32642	16.4141	-4.14027	0.000780808	0.0203461	1
ENSG00000197061	HIST1H4I	H4_HUMAN	P62805	A_23_P214487	-0.32642	16.4141	-4.14027	0.000780808	0.0203461	1
ENSG00000197061	HIST1H4J	H4_HUMAN	P62805	A_23_P214487	-0.32642	16.4141	-4.14027	0.000780808	0.0203461	1
ENSG00000197061	HIST1H4K	H4_HUMAN	P62805	A_23_P214487	-0.32642	16.4141	-4.14027	0.000780808	0.0203461	1
ENSG00000197061	HIST1H4L	H4_HUMAN	P62805	A_23_P214487	-0.32642	16.4141	-4.14027	0.000780808	0.0203461	1
ENSG00000197061	HIST2H4A	H4_HUMAN	P62805	A_23_P214487	-0.32642	16.4141	-4.14027	0.000780808	0.0203461	1
ENSG00000197061	HIST2H4B	H4_HUMAN	P62805	A_23_P214487	-0.32642	16.4141	-4.14027	0.000780808	0.0203461	1
ENSG00000197061	HIST4H4	H4_HUMAN	P62805	A_23_P214487	-0.32642	16.4141	-4.14027	0.000780808	0.0203461	1
ENSG00000111145	ELK3	ELK3_HUMAN	P41970	A_24_P133171	0.427479	10.6479	4.13788	0.00078471	0.0204348	1
ENSG00000235109	ZSCAN31	ZSC31_HUMAN	Q96LW9	A_23_P214533	-0.314902	7.65434	-4.1375	0.000785329	0.0204379	1
ENSG00000258655	-	-	-	A_23_P25746	0.435484	9.67484	4.13335	0.000792156	0.0205813	1
ENSG00000034510	TMSB10	TYB10_HUMAN	P63313	A_23_P68106	0.301123	16.0121	4.13324	0.000792341	0.0205813	1
ENSG00000163565	IFI16	IF16_HUMAN	Q16666	A_23_P160025	0.410054	7.73624	4.13136	0.000795454	0.0206492	1
ENSG00000178878	APOLD1	APLD1_HUMAN	Q96LR9	A_23_P48217	0.464902	8.84973	4.13005	0.000797636	0.0206927	1
ENSG00000166974	MAPRE2	MARE2_HUMAN	Q15555	A_23_P89835	-0.311143	8.30221	-4.1285	0.000800209	0.0207464	1
ENSG00000102349	KLF8	KLF8_HUMAN	O95600	A_24_P937159	0.347002	10.4865	4.1277	0.000801549	0.020768	1
ENSG00000137285	TUBB2B	TBB2B_HUMAN	Q9BVA1	A_24_P314477	-0.332219	13.545	-4.12525	0.000805657	0.0208613	1
ENSG00000163377	FAM19A4	F19A4_HUMAN	Q96LR4	A_32_P71571	-0.294406	7.25688	-4.12446	0.000806995	0.0208828	1
ENSG00000223816	-	-	-	A_32_P148118	0.298425	7.20627	4.12232	0.000810599	0.0209584	1
ENSG00000235235	-	-	-	A_32_P148118	0.298425	7.20627	4.12232	0.000810599	0.0209584	1
ENSG00000058804	NDC1	NDC1_HUMAN	Q9BTX1	A_24_P222192	-0.428757	9.41377	-4.12201	0.000811129	0.0209584	1
ENSG00000164935	DCSTAMP	DCSTP_HUMAN	Q9H295	A_23_P43107	0.281047	7.06638	4.12182	0.000811448	0.0209584	1
ENSG00000163412	EIF4E3	IF4E3_HUMAN	Q8N5X7	A_24_P943113	-0.341871	7.77614	-4.11985	0.000814787	0.0210182	1
ENSG00000110931	CAMKK2	KKCC2_HUMAN	Q96RR4	A_23_P408830	-0.356442	9.89842	-4.11885	0.000816494	0.021049	1
ENSG00000122042	UBL3	UBL3_HUMAN	O95164	A_23_P140029	-0.40197	9.74132	-4.11697	0.000819698	0.0211066	1
ENSG00000040531	CTNS	CTNS_HUMAN	O60931	A_23_P427075	0.274612	10.4199	4.11694	0.000819755	0.0211066	1
ENSG00000249853	HS3ST5	HS3S5_HUMAN	Q8IZT8	A_24_P226508	-0.416675	7.80793	-4.11639	0.000820698	0.0211177	1
ENSG00000151952	TMEM132D	T132D_HUMAN	Q14C87	A_23_P308839	-0.260806	7.96531	-4.11487	0.000823306	0.0211715	1
ENSG00000196090	PTPRT	PTPRT_HUMAN	O14522	A_23_P135576	0.401777	7.21238	4.11201	0.000828229	0.0212796	1
ENSG00000221968	FADS3	FADS3_HUMAN	Q9Y5Q0	A_23_P64404	-0.395836	8.96826	-4.11183	0.000828545	0.0212796	1
ENSG00000177669	MBOAT4	MBOA4_HUMAN	Q96T53	A_24_P306824	0.335982	6.97165	4.1111	0.000829806	0.0212926	1
ENSG00000067840	PDZD4	PDZD4_HUMAN	Q76G19	A_24_P265088	-0.464188	8.19348	-4.11064	0.000830604	0.0212926	1
ENSG00000168772	CXXC4	CXXC4_HUMAN	Q9H2H0	A_23_P121676	0.388296	8.05536	4.10982	0.00083203	0.0213158	1
ENSG00000230787	-	-	-	A_24_P221485	-0.399342	8.49805	-4.10863	0.000834095	0.0213554	1
ENSG00000180901	KCTD2	KCTD2_HUMAN	Q14681	A_24_P324011	-0.318912	8.92189	-4.10673	0.000837426	0.0214274	1
ENSG00000135636	DYSF	DYSF_HUMAN	O75923	A_23_P39931	-0.307328	7.76417	-4.10537	0.000839806	0.0214749	1
ENSG00000119185	ITGB1BP1	ITBP1_HUMAN	O14713	A_23_P154507	0.294083	11.7411	4.10317	0.000843659	0.0215567	1
ENSG00000160182	TFF1	TFF1_HUMAN	P04155	A_24_P322771	0.417694	8.20545	4.10295	0.000844055	0.0215567	1
ENSG00000149054	ZNF215	ZN215_HUMAN	Q9UL58	A_23_P53057	-0.280727	9.22518	-4.10252	0.000844811	0.0215626	1
ENSG00000106211	HSPB1	HSPB1_HUMAN	P04792	A_23_P257704	0.387087	15.5866	4.10196	0.000845797	0.0215744	1
ENSG00000236060	-	-	-	A_23_P257704	0.387087	15.5866	4.10196	0.000845797	0.0215744	1
ENSG00000182199	SHMT2	GLYM_HUMAN	P34897	A_23_P158239	-0.265264	11.5559	-4.1016	0.000846446	0.0215775	1
ENSG00000146904	EPHA1	EPHA1_HUMAN	P21709	A_23_P157333	-0.32475	9.53351	-4.0996	0.000849983	0.0216543	1
ENSG00000169116	PARM1	PARM1_HUMAN	Q6UWI2	A_23_P212779	-0.494031	8.29888	-4.09851	0.000851911	0.02169	1
ENSG00000226091	-	-	-	A_32_P221305	0.324273	9.33234	4.09805	0.000852737	0.0216928	1
ENSG00000272840	-	-	-	A_32_P221305	0.324273	9.33234	4.09805	0.000852737	0.0216928	1
ENSG00000113391	FAM172A	F172A_HUMAN	Q8WUF8	A_24_P103363	-0.333897	7.63824	-4.0976	0.000853537	0.0216928	1
ENSG00000162981	FAM84A	FA84A_HUMAN	Q96KN4	A_23_P306211	0.321657	7.30759	4.09756	0.000853606	0.0216928	1
ENSG00000168263	KCNV2	KCNV2_HUMAN	Q8TDN2	A_23_P32083	0.318371	7.63731	4.09588	0.000856603	0.0217474	1
ENSG00000168701	TMEM208	TM208_HUMAN	Q9BTX3	A_23_P206369	0.246392	13.3933	4.09577	0.000856812	0.0217474	1
ENSG00000166147	FBN1	FBN1_HUMAN	P35555	A_23_P65678	0.381838	9.1548	4.0947	0.00085873	0.0217826	1
ENSG00000141956	PRDM15	PRD15_HUMAN	P57071	A_32_P145989	-0.272565	7.03654	-4.09388	0.000860196	0.0218063	1
ENSG00000141956	ZNF298	PRD15_HUMAN	P57071	A_32_P145989	-0.272565	7.03654	-4.09388	0.000860196	0.0218063	1
ENSG00000187954	CYHR1	CYHR1_HUMAN	Q6ZMK1	A_24_P89843	0.343086	10.3247	4.09294	0.000861886	0.0218264	1
ENSG00000169570	DTWD2	DTWD2_HUMAN	Q8NBA8	A_23_P346982	-0.461734	9.73052	-4.09255	0.000862583	0.0218264	1
ENSG00000106852	LHX6	LHX6_HUMAN	Q9UPM6	A_23_P32177	-0.285307	7.07422	-4.09166	0.000864195	0.0218538	1
ENSG00000242109	-	-	-	A_24_P677783	-0.299783	12.9451	-4.09051	0.000866266	0.0218792	1
ENSG00000224074	-	-	-	A_24_P677783	-0.299783	12.9451	-4.09051	0.000866266	0.0218792	1
ENSG00000144681	STAC	STAC_HUMAN	Q99469	A_24_P234415	-0.426741	7.71452	-4.08896	0.000869081	0.0219368	1
ENSG00000239264	TXNDC5	TXND5_HUMAN	Q8NBS9	A_23_P168229	-0.471183	11.4445	-4.08828	0.000870314	0.0219545	1
ENSG00000259040	BLOC1S5-TXNDC5	-	-	A_23_P168229	-0.471183	11.4445	-4.08828	0.000870314	0.0219545	1
ENSG00000259040	TXNDC5	-	-	A_23_P168229	-0.471183	11.4445	-4.08828	0.000870314	0.0219545	1
ENSG00000132906	CASP9	CASP9_HUMAN	P55211	A_24_P111342	0.26159	11.1567	4.08792	0.00087097	0.0219575	1
ENSG00000189403	HMGB1	HMGB1_HUMAN	P09429	A_24_P169148	-0.37817	13.8514	-4.08676	0.000873081	0.0219973	1
ENSG00000213707	-	-	-	A_24_P169148	-0.37817	13.8514	-4.08676	0.000873081	0.0219973	1
ENSG00000132967	-	-	-	A_24_P169148	-0.37817	13.8514	-4.08676	0.000873081	0.0219973	1
ENSG00000124097	-	-	-	A_24_P169148	-0.37817	13.8514	-4.08676	0.000873081	0.0219973	1
ENSG00000197442	MAP3K5	M3K5_HUMAN	Q99683	A_23_P134125	-0.310867	8.07208	-4.08636	0.000873809	0.0220021	1
ENSG00000151233	GXYLT1	GXLT1_HUMAN	Q4G148	A_32_P62342	0.272326	9.446	4.08504	0.000876227	0.0220395	1
ENSG00000117152	RGS4	RGS4_HUMAN	P49798	A_23_P433855	0.401662	7.20499	4.08497	0.000876366	0.0220395	1
ENSG00000109320	NFKB1	NFKB1_HUMAN	P19838	A_23_P30024	0.355721	8.57209	4.08406	0.000878021	0.0220676	1
ENSG00000241293	-	-	-	A_23_P80940	-0.401155	10.1749	-4.08116	0.000883365	0.0221748	1
ENSG00000128059	PPAT	PUR1_HUMAN	Q06203	A_23_P80940	-0.401155	10.1749	-4.08116	0.000883365	0.0221748	1
ENSG00000168078	PBK	TOPK_HUMAN	Q96KB5	A_32_P62997	0.37929	9.61584	4.07975	0.00088597	0.0222266	1
ENSG00000245857	-	-	-	A_32_P145769	0.294792	7.24202	4.07881	0.000887709	0.0222566	1
ENSG00000197321	SVIL	SVIL_HUMAN	O95425	A_23_P35349	-0.382786	9.01677	-4.07762	0.000889917	0.0222984	1
ENSG00000234814	-	-	-	A_23_P35349	-0.382786	9.01677	-4.07762	0.000889917	0.0222984	1
ENSG00000125878	TCF15	TCF15_HUMAN	Q12870	A_23_P254816	-0.318546	10.7031	-4.07596	0.000893021	0.0223625	1
ENSG00000204444	APOM	APOM_HUMAN	O95445	A_23_P42265	-0.372569	8.99072	-4.07377	0.000897107	0.0224512	1
ENSG00000227198	-	-	-	A_23_P42265	-0.372569	8.99072	-4.07377	0.000897107	0.0224512	1
ENSG00000153930	ANKFN1	ANKF1_HUMAN	Q8N957	A_32_P316545	0.333219	7.07444	4.07342	0.000897763	0.0224539	1
ENSG00000110108	TMEM109	TM109_HUMAN	Q9BVC6	A_23_P203364	0.325024	8.8358	4.07195	0.000900524	0.0224797	1
ENSG00000213047	DENND1B	DEN1B_HUMAN	Q6P3S1	A_23_P320897	0.293147	8.39603	4.07173	0.000900952	0.0224797	1
ENSG00000276903	HIST1H2AG	H2A1_HUMAN	P0C0S8	A_23_P363174	-0.434647	8.53599	-4.07171	0.000900981	0.0224797	1
ENSG00000276903	HIST1H2AI	H2A1_HUMAN	P0C0S8	A_23_P363174	-0.434647	8.53599	-4.07171	0.000900981	0.0224797	1
ENSG00000276903	HIST1H2AK	H2A1_HUMAN	P0C0S8	A_23_P363174	-0.434647	8.53599	-4.07171	0.000900981	0.0224797	1
ENSG00000276903	HIST1H2AL	H2A1_HUMAN	P0C0S8	A_23_P363174	-0.434647	8.53599	-4.07171	0.000900981	0.0224797	1
ENSG00000276903	HIST1H2AM	H2A1_HUMAN	P0C0S8	A_23_P363174	-0.434647	8.53599	-4.07171	0.000900981	0.0224797	1
ENSG00000162688	AGL	GDE_HUMAN	P35573	A_23_P200298	0.34564	11.8569	4.07092	0.000902471	0.0225032	1
ENSG00000081870	HSPB11	IFT25_HUMAN	Q9Y547	A_23_P96872	0.345309	12.5091	4.06986	0.000904476	0.0225395	1
ENSG00000274618	HIST1H4A	H4_HUMAN	P62805	A_23_P359540	-0.524887	10.8797	-4.06941	0.00090533	0.0225471	1
ENSG00000274618	HIST1H4B	H4_HUMAN	P62805	A_23_P359540	-0.524887	10.8797	-4.06941	0.00090533	0.0225471	1
ENSG00000274618	HIST1H4C	H4_HUMAN	P62805	A_23_P359540	-0.524887	10.8797	-4.06941	0.00090533	0.0225471	1
ENSG00000274618	HIST1H4D	H4_HUMAN	P62805	A_23_P359540	-0.524887	10.8797	-4.06941	0.00090533	0.0225471	1
ENSG00000274618	HIST1H4E	H4_HUMAN	P62805	A_23_P359540	-0.524887	10.8797	-4.06941	0.00090533	0.0225471	1
ENSG00000274618	HIST1H4F	H4_HUMAN	P62805	A_23_P359540	-0.524887	10.8797	-4.06941	0.00090533	0.0225471	1
ENSG00000274618	HIST1H4H	H4_HUMAN	P62805	A_23_P359540	-0.524887	10.8797	-4.06941	0.00090533	0.0225471	1
ENSG00000274618	HIST1H4I	H4_HUMAN	P62805	A_23_P359540	-0.524887	10.8797	-4.06941	0.00090533	0.0225471	1
ENSG00000274618	HIST1H4J	H4_HUMAN	P62805	A_23_P359540	-0.524887	10.8797	-4.06941	0.00090533	0.0225471	1
ENSG00000274618	HIST1H4K	H4_HUMAN	P62805	A_23_P359540	-0.524887	10.8797	-4.06941	0.00090533	0.0225471	1
ENSG00000274618	HIST1H4L	H4_HUMAN	P62805	A_23_P359540	-0.524887	10.8797	-4.06941	0.00090533	0.0225471	1
ENSG00000274618	HIST2H4A	H4_HUMAN	P62805	A_23_P359540	-0.524887	10.8797	-4.06941	0.00090533	0.0225471	1
ENSG00000274618	HIST2H4B	H4_HUMAN	P62805	A_23_P359540	-0.524887	10.8797	-4.06941	0.00090533	0.0225471	1
ENSG00000274618	HIST4H4	H4_HUMAN	P62805	A_23_P359540	-0.524887	10.8797	-4.06941	0.00090533	0.0225471	1
ENSG00000105251	SHD	SHD_HUMAN	Q96IW2	A_23_P142255	-0.299454	9.20433	-4.06644	0.000910958	0.0226461	1
ENSG00000153237	CCDC148	CC148_HUMAN	Q8NFR7	A_23_P411825	0.285231	7.21089	4.06505	0.000913615	0.0226984	1
ENSG00000072518	MARK2	MARK2_HUMAN	Q7KZI7	A_23_P161595	-0.324373	11.5002	-4.06441	0.000914846	0.0227153	1
ENSG00000182534	MXRA7	MXRA7_HUMAN	P84157	A_32_P161681	0.258755	9.58437	4.0638	0.000916007	0.0227236	1
ENSG00000141179	PCTP	PPCT_HUMAN	Q9UKL6	A_23_P4041	0.41377	12.6279	4.06365	0.000916288	0.0227236	1
ENSG00000197943	PLCG2	PLCG2_HUMAN	P16885	A_23_P106675	0.29516	9.71638	4.06269	0.000918141	0.0227497	1
ENSG00000164089	ETNPPL	AT2L1_HUMAN	Q8TBG4	A_23_P257231	0.443761	8.23564	4.06228	0.000918922	0.0227497	1
ENSG00000128829	EIF2AK4	E2AK4_HUMAN	Q9P2K8	A_23_P54540	-0.424869	11.1423	-4.06224	0.000919002	0.0227497	1
ENSG00000176383	B3GNT4	B3GN4_HUMAN	Q9C0J1	A_23_P76071	0.375565	8.2792	4.06186	0.000919728	0.022754	1
ENSG00000051620	HEBP2	HEBP2_HUMAN	Q9Y5Z4	A_23_P19691	-0.411124	14.2254	-4.06107	0.000921251	0.022778	1
ENSG00000155096	AZIN1	AZIN1_HUMAN	O14977	A_23_P157435	-0.449491	12.1254	-4.05944	0.0009244	0.0228421	1
ENSG00000233867	-	-	-	A_24_P657226	-0.286292	6.96991	-4.05897	0.000925296	0.0228422	1
ENSG00000185338	SOCS1	SOCS1_HUMAN	O15524	A_24_P48014	-0.276736	7.52593	-4.0587	0.000925826	0.0228422	1
ENSG00000130307	USHBP1	USBP1_HUMAN	Q8N6Y0	A_32_P189592	-0.302937	7.5026	-4.05857	0.000926074	0.0228422	1
ENSG00000237493	-	-	-	A_23_P46369	-0.269867	11.0784	-4.05823	0.000926737	0.0228449	1
ENSG00000143545	RAB13	RAB13_HUMAN	P51153	A_23_P46369	-0.269867	11.0784	-4.05823	0.000926737	0.0228449	1
ENSG00000154845	PPP4R1	PP4R1_HUMAN	Q8TF05	A_23_P15857	-0.377457	9.26905	-4.05759	0.000927983	0.0228619	1
ENSG00000186866	POFUT2	OFUT2_HUMAN	Q9Y2G5	A_24_P14595	0.273179	11.9616	4.05722	0.000928684	0.0228654	1
ENSG00000251400	-	-	-	A_23_P70231	-0.333694	12.6819	-4.05652	0.000930055	0.0228855	1
ENSG00000164904	ALDH7A1	AL7A1_HUMAN	P49419	A_23_P70231	-0.333694	12.6819	-4.05652	0.000930055	0.0228855	1
ENSG00000110721	CHKA	CHKA_HUMAN	P35790	A_23_P136135	-0.270485	9.23105	-4.05569	0.000931674	0.0229116	1
ENSG00000163093	BBS5	BBS5_HUMAN	Q8N3I7	A_23_P5785	0.325624	7.44243	4.05531	0.000932407	0.0229159	1
ENSG00000055130	CUL1	CUL1_HUMAN	Q13616	A_23_P59657	-0.423812	11.2509	-4.05379	0.000935384	0.0229676	1
ENSG00000111252	SH2B3	SH2B3_HUMAN	Q9UQQ2	A_24_P201739	-0.343207	8.80591	-4.05366	0.000935628	0.0229676	1
ENSG00000269728	-	-	-	A_32_P171313	-0.405303	11.1407	-4.053	0.000936925	0.0229857	1
ENSG00000165948	IFI27L1	I27L1_HUMAN	Q96BM0	A_23_P53976	0.299037	13.3299	4.05198	0.000938931	0.0230212	1
ENSG00000136504	KAT7	KAT7_HUMAN	O95251	A_23_P152818	-0.324272	9.6686	-4.05154	0.00093979	0.0230285	1
ENSG00000160216	AGPAT3	PLCC_HUMAN	Q9NRZ7	A_24_P344711	0.276523	10.7396	4.04908	0.000944639	0.0231197	1
ENSG00000187514	PTMA	PTMA_HUMAN	P06454	A_24_P264211	-0.604948	13.6743	-4.04874	0.000945304	0.0231222	1
ENSG00000259020	-	-	-	A_24_P264211	-0.604948	13.6743	-4.04874	0.000945304	0.0231222	1
ENSG00000198134	-	-	-	A_24_P264211	-0.604948	13.6743	-4.04874	0.000945304	0.0231222	1
ENSG00000231503	-	-	-	A_24_P264211	-0.604948	13.6743	-4.04874	0.000945304	0.0231222	1
ENSG00000114739	ACVR2B	AVR2B_HUMAN	Q13705	A_23_P109950	-0.294461	11.1682	-4.04728	0.000948192	0.0231791	1
ENSG00000023697	DERA	DEOC_HUMAN	Q9Y315	A_23_P25253	0.357189	12.3024	4.04509	0.000952556	0.0232719	1
ENSG00000123560	PLP1	MYPR_HUMAN	P60201	A_23_P85201	-0.385954	7.99753	-4.04419	0.000954355	0.023302	1
ENSG00000188646	-	-	-	A_24_P834110	0.275646	10.1139	4.04336	0.000956014	0.0233055	1
ENSG00000230896	-	-	-	A_24_P855152	0.289857	7.87042	4.04306	0.000956597	0.0233055	1
ENSG00000197429	IPP	IPP_HUMAN	Q9Y573	A_24_P855152	0.289857	7.87042	4.04306	0.000956597	0.0233055	1
ENSG00000174780	SRP72	SRP72_HUMAN	O76094	A_23_P337201	-0.304494	12.6138	-4.04279	0.000957137	0.0233055	1
ENSG00000108064	TFAM	TFAM_HUMAN	Q00059	A_23_P414771	-0.435211	12.0005	-4.04186	0.000959002	0.0233323	1
ENSG00000092964	DPYSL2	DPYL2_HUMAN	Q16555	A_23_P350824	-0.473069	11.9144	-4.03942	0.000963921	0.0234381	1
ENSG00000138356	AOX1	AOXA_HUMAN	Q06278	A_23_P154037	0.406589	9.22473	4.03811	0.000966564	0.0234885	1
ENSG00000279158	VCY	VCY1_HUMAN	O14598	A_23_P11390	0.353613	9.12833	4.03757	0.000967662	0.0234937	1
ENSG00000279158	VCY1B	VCY1_HUMAN	O14598	A_23_P11390	0.353613	9.12833	4.03757	0.000967662	0.0234937	1
ENSG00000279451	VCY	VCY1_HUMAN	O14598	A_23_P11390	0.353613	9.12833	4.03757	0.000967662	0.0234937	1
ENSG00000279451	VCY1B	VCY1_HUMAN	O14598	A_23_P11390	0.353613	9.12833	4.03757	0.000967662	0.0234937	1
ENSG00000129864	VCY	VCY1_HUMAN	O14598	A_23_P11390	0.353613	9.12833	4.03757	0.000967662	0.0234937	1
ENSG00000129864	VCY1B	VCY1_HUMAN	O14598	A_23_P11390	0.353613	9.12833	4.03757	0.000967662	0.0234937	1
ENSG00000129862	VCY	VCY1_HUMAN	O14598	A_23_P11390	0.353613	9.12833	4.03757	0.000967662	0.0234937	1
ENSG00000129862	VCY1B	VCY1_HUMAN	O14598	A_23_P11390	0.353613	9.12833	4.03757	0.000967662	0.0234937	1
ENSG00000178104	PDE4DIP	MYOME_HUMAN	Q5VU43	A_23_P200801	0.466191	9.04397	4.03739	0.000968025	0.0234937	1
ENSG00000204983	PRSS1	TRY1_HUMAN	P07477	A_23_P380754	0.436605	9.34422	4.03683	0.000969152	0.0234937	1
ENSG00000175274	TP53I11	P5I11_HUMAN	O14683	A_23_P150281	0.380007	10.9853	4.03668	0.000969452	0.0234937	1
ENSG00000168297	PXK	PXK_HUMAN	Q7Z7A4	A_32_P115606	0.297014	8.40544	4.036	0.000970836	0.0235	1
ENSG00000076662	ICAM3	ICAM3_HUMAN	P32942	A_23_P164691	-0.333267	10.7453	-4.0359	0.000971041	0.0235	1
ENSG00000112249	ASCC3	ASCC3_HUMAN	Q8N3C0	A_23_P30972	-0.471652	10.1636	-4.03523	0.000972404	0.0235191	1
ENSG00000105499	PLA2G4C	PA24C_HUMAN	Q9UP65	A_23_P50508	-0.405012	7.64599	-4.03473	0.000973413	0.0235297	1
ENSG00000279887	-	-	-	A_32_P21099	0.300407	6.97791	4.03259	0.000977792	0.0236117	1
ENSG00000106772	PRUNE2	PRUN2_HUMAN	Q8WUY3	A_23_P406025	0.343106	8.58926	4.03251	0.000977957	0.0236117	1
ENSG00000124942	AHNAK	AHNK_HUMAN	Q09666	A_24_P943393	0.575515	12.6916	4.03119	0.000980668	0.0236504	1
ENSG00000177425	PAWR	PAWR_HUMAN	Q96IZ0	A_23_P53663	-0.508911	11.5626	-4.03099	0.000981062	0.0236504	1
ENSG00000169684	CHRNA5	ACHA5_HUMAN	P30532	A_23_P88691	-0.320662	9.77834	-4.03089	0.000981283	0.0236504	1
ENSG00000063241	ISOC2	ISOC2_HUMAN	Q96AB3	A_24_P99795	-0.283319	11.2856	-4.03037	0.000982338	0.0236619	1
[truncated: 39,379 more rows]
