# Supplementary material for: Collagen Type I Improves the Differentiation of Human Embryonic Stem Cells towards Definitive Endoderm
Source: PLoS One. 2015 Dec 29;10(12):e0145389. doi: 10.1371/journal.pone.0145389 (PMC4694921; doi:10.1371/journal.pone.0145389)
Supplement: S7 Table — Gene expression in cell on Col 2+Fn compared to the gene expression in cells on Fn. (XLSX) [file pone.0145389.s011.xlsx]

## Sheet: Ark1
Col2+Fn vs Fn
Ensembl_gene_ID	Gene_name	UniProt_ID	UniProt_accession	Probe_ID	log2 Fold Change	Average Expression	t statistic	p-Value	BH-adusted p-Value	Bonferroni corrected p-value
ENSG00000278626	-	-	-	A_32_P116957	-0.547413	7.04648	-6.90597	3.69099e-06	0.13953	0.151674
ENSG00000162909	CAPN2	CAN2_HUMAN	P17655	A_23_P23924	0.411472	13.4431	6.00762	1.88837e-05	0.208611	0.775989
ENSG00000099250	NRP1	NRP1_HUMAN	O14786	A_24_P928052	0.428318	8.28376	5.68518	3.48479e-05	0.208611	1
ENSG00000102755	FLT1	VGFR1_HUMAN	P17948	A_24_P246125	-0.353816	7.22906	-5.47183	5.26662e-05	0.208611	1
ENSG00000112159	MDN1	MDN1_HUMAN	Q9NU22	A_23_P365060	-0.470271	9.00848	-5.45089	5.48626e-05	0.208611	1
ENSG00000104312	RIPK2	RIPK2_HUMAN	O43353	A_23_P252106	0.459577	12.4158	5.41716	5.86002e-05	0.208611	1
ENSG00000177301	KCNA2	KCNA2_HUMAN	P16389	A_32_P40596	0.375731	6.9031	5.27741	7.71223e-05	0.208611	1
ENSG00000186198	SLC51B	OSTB_HUMAN	Q86UW2	A_23_P436284	0.368053	7.09088	5.26679	7.87565e-05	0.208611	1
ENSG00000092421	SEMA6A	SEM6A_HUMAN	Q9H2E6	A_23_P312840	-0.699096	10.3593	-5.25218	8.10643e-05	0.208611	1
ENSG00000116031	CD207	CLC4K_HUMAN	Q9UJ71	A_23_P39790	-0.352843	7.01498	-5.20726	8.86038e-05	0.208611	1
ENSG00000105323	HNRNPUL1	HNRL1_HUMAN	Q9BUJ2	A_24_P108351	-0.40866	10.3025	-5.08934	0.000112033	0.208611	1
ENSG00000185186	-	-	-	A_23_P381489	0.329848	6.96312	5.07632	0.000114984	0.208611	1
ENSG00000280191	-	-	-	A_23_P381489	0.329848	6.96312	5.07632	0.000114984	0.208611	1
ENSG00000135870	RC3H1	RC3H1_HUMAN	Q5TC82	A_32_P96807	0.401714	11.3015	5.06658	0.000117246	0.208611	1
ENSG00000010404	IDS	IDS_HUMAN	P22304	A_32_P38345	0.422953	7.11044	5.06348	0.000117973	0.208611	1
ENSG00000178163	ZNF518B	Z518B_HUMAN	Q9C0D4	A_32_P144421	0.385349	10.2297	5.05748	0.000119397	0.208611	1
ENSG00000124575	HIST1H1D	H13_HUMAN	P16402	A_24_P260639	-0.497394	12.1699	-5.05017	0.000121157	0.208611	1
ENSG00000131094	C1QL1	C1QRF_HUMAN	O75973	A_23_P77993	-0.424391	8.02437	-5.02196	0.000128199	0.208611	1
ENSG00000116017	ARID3A	ARI3A_HUMAN	Q99856	A_23_P16516	-0.349683	11.93	-5.00092	0.000133727	0.208611	1
ENSG00000259917	-	-	-	A_24_P42122	-0.37182	11.2956	-5.00054	0.000133829	0.208611	1
ENSG00000268083	-	-	-	A_24_P42122	-0.37182	11.2956	-5.00054	0.000133829	0.208611	1
ENSG00000104824	HNRNPL	HNRPL_HUMAN	P14866	A_24_P42122	-0.37182	11.2956	-5.00054	0.000133829	0.208611	1
ENSG00000168234	TTC39C	TT39C_HUMAN	Q8N584	A_32_P155052	-0.510099	8.98028	-4.99518	0.000135276	0.208611	1
ENSG00000010017	RANBP9	RANB9_HUMAN	Q96S59	A_23_P59268	0.353863	12.4878	4.94801	0.00014873	0.208611	1
ENSG00000133678	TMEM254	TM254_HUMAN	Q8TBM7	A_23_P97853	0.386694	10.7986	4.87283	0.000173085	0.208611	1
ENSG00000222371	-	-	-	A_24_P376120	-0.324081	7.02084	-4.86188	0.000176961	0.208611	1
ENSG00000138347	MYPN	MYPN_HUMAN	Q86TC9	A_24_P376120	-0.324081	7.02084	-4.86188	0.000176961	0.208611	1
ENSG00000233867	-	-	-	A_24_P657226	-0.342038	6.96991	-4.84931	0.000181518	0.208611	1
ENSG00000170955	PRKCDBP	PRDBP_HUMAN	Q969G5	A_23_P203475	0.407119	14.6224	4.84401	0.000183475	0.208611	1
ENSG00000104953	TLE6	TLE6_HUMAN	Q9H808	A_23_P426501	0.315392	8.44488	4.84029	0.000184865	0.208611	1
ENSG00000183199	-	-	-	A_32_P147505	-0.37228	12.453	-4.81738	0.000193647	0.208611	1
ENSG00000184731	FAM110C	F110C_HUMAN	Q1W6H9	A_32_P47643	-0.430741	8.22657	-4.80116	0.000200124	0.208611	1
ENSG00000178301	AQP11	AQP11_HUMAN	Q8NBQ7	A_23_P417974	0.318557	8.2642	4.75973	0.000217695	0.208611	1
ENSG00000150995	ITPR1	ITPR1_HUMAN	Q14643	A_23_P92042	-0.371712	7.79681	-4.72439	0.000233929	0.208611	1
ENSG00000121316	PLBD1	PLBL1_HUMAN	Q6P4A8	A_23_P87709	-0.421759	10.1903	-4.7176	0.000237186	0.208611	1
ENSG00000164161	HHIP	HHIP_HUMAN	Q96QV1	A_23_P167129	0.30494	7.14846	4.71091	0.000240443	0.208611	1
ENSG00000075884	ARHGAP15	RHG15_HUMAN	Q53QZ3	A_23_P255166	-0.398841	7.10112	-4.70103	0.000245334	0.208611	1
ENSG00000123143	PKN1	PKN1_HUMAN	Q16512	A_23_P67271	-0.379132	10.0228	-4.69106	0.000250376	0.208611	1
ENSG00000071575	TRIB2	TRIB2_HUMAN	Q92519	A_24_P396753	-0.363351	7.62551	-4.68525	0.000253362	0.208611	1
ENSG00000089250	NOS1	NOS1_HUMAN	P29475	A_23_P204791	0.292323	6.99995	4.67968	0.000256258	0.208611	1
ENSG00000254321	-	-	-	A_32_P59693	-0.375149	7.05095	-4.67666	0.000257842	0.208611	1
ENSG00000150938	CRIM1	CRIM1_HUMAN	Q9NZV1	A_23_P51105	-0.305016	7.88148	-4.67637	0.000257996	0.208611	1
ENSG00000161940	BCL6B	BCL6B_HUMAN	Q8N143	A_23_P324813	0.297076	7.20607	4.66965	0.00026156	0.208611	1
ENSG00000124721	DNAH8	DYH8_HUMAN	Q96JB1	A_24_P926631	0.329832	7.02966	4.65658	0.000268636	0.208611	1
ENSG00000132669	RIN2	RIN2_HUMAN	Q8WYP3	A_24_P305570	0.331813	8.41543	4.65465	0.000269703	0.208611	1
ENSG00000101191	DIDO1	DIDO1_HUMAN	Q9BTC0	A_24_P322611	-0.437063	9.48809	-4.6534	0.000270391	0.208611	1
ENSG00000125447	GGA3	GGA3_HUMAN	Q9NZ52	A_23_P38181	0.336448	10.5279	4.6471	0.000273896	0.208611	1
ENSG00000110092	CCND1	CCND1_HUMAN	P24385	A_24_P193011	-0.42831	8.58185	-4.62733	0.000285199	0.208611	1
ENSG00000237166	-	-	-	A_24_P516704	-0.434408	6.94479	-4.6076	0.000296958	0.208611	1
ENSG00000008277	ADAM22	ADA22_HUMAN	Q9P0K1	A_24_P929899	0.369614	7.01486	4.60571	0.000298112	0.208611	1
ENSG00000254621	-	-	-	A_24_P796274	-0.332222	10.638	-4.57773	0.00031571	0.208611	1
ENSG00000185808	PIGP	PIGP_HUMAN	P57054	A_23_P143484	0.331175	10.5712	4.57049	0.000320434	0.208611	1
ENSG00000086730	LAT2	NTAL_HUMAN	Q9GZY6	A_24_P940327	-0.3729	6.92468	-4.56944	0.000321127	0.208611	1
ENSG00000128573	FOXP2	FOXP2_HUMAN	O15409	A_24_P921683	0.390781	7.11705	4.56673	0.000322919	0.208611	1
ENSG00000107984	DKK1	DKK1_HUMAN	O94907	A_23_P24129	0.452773	10.5883	4.54298	0.000339058	0.208611	1
ENSG00000100249	C22orf31	CV031_HUMAN	O95567	A_23_P132237	0.33241	6.96169	4.53713	0.000343158	0.208611	1
ENSG00000076706	MCAM	MUC18_HUMAN	P43121	A_23_P162171	-0.329778	10.4754	-4.53426	0.000345188	0.208611	1
ENSG00000163818	LZTFL1	LZTL1_HUMAN	Q9NQ48	A_23_P41049	0.2951	10.0731	4.51433	0.000359628	0.208611	1
ENSG00000278931	-	-	-	A_32_P13151	0.346019	6.93556	4.50397	0.000367378	0.208611	1
ENSG00000255647	-	-	-	A_32_P832001	0.350762	7.11054	4.50271	0.000368333	0.208611	1
ENSG00000101444	AHCY	SAHH_HUMAN	P23526	A_24_P57367	-0.359674	12.2809	-4.50154	0.000369219	0.208611	1
ENSG00000168234	TTC39C	TT39C_HUMAN	Q8N584	A_23_P308305	-0.608618	10.0517	-4.49322	0.000375596	0.208611	1
ENSG00000124721	DNAH8	DYH8_HUMAN	Q96JB1	A_24_P308051	0.340163	7.01863	4.49073	0.00037753	0.208611	1
ENSG00000087008	ACOX3	ACOX3_HUMAN	O15254	A_24_P354451	0.316222	10.335	4.47791	0.000387632	0.208611	1
ENSG00000144406	UNC80	UNC80_HUMAN	Q8N2C7	A_32_P447785	-0.313547	6.91828	-4.47197	0.000392401	0.208611	1
ENSG00000183625	CCR3	CCR3_HUMAN	P51677	A_23_P250302	0.331504	6.87621	4.46646	0.000396884	0.208611	1
ENSG00000130726	TRIM28	TIF1B_HUMAN	Q13263	A_23_P89884	-0.345587	13.7381	-4.46124	0.00040118	0.208611	1
ENSG00000183760	PAPL	-	-	A_24_P53406	0.29468	7.13427	4.45863	0.000403348	0.208611	1
ENSG00000166743	ACSM1	ACSM1_HUMAN	Q08AH1	A_23_P106933	-0.338962	7.02731	-4.45445	0.00040684	0.208611	1
ENSG00000205181	-	-	-	A_32_P174156	0.34445	7.06979	4.45274	0.000408275	0.208611	1
ENSG00000159251	ACTC1	ACTC_HUMAN	P68032	A_24_P121535	-0.346577	14.4753	-4.45178	0.000409084	0.208611	1
ENSG00000105519	CAPS	CAYP1_HUMAN	Q13938	A_23_P78958	0.323231	8.19113	4.44276	0.000416769	0.208611	1
ENSG00000168234	TTC39C	TT39C_HUMAN	Q8N584	A_32_P123629	-0.512428	11.1581	-4.44241	0.000417068	0.208611	1
ENSG00000102931	ARL2BP	AR2BP_HUMAN	Q9Y2Y0	A_23_P15182	0.308507	10.7396	4.43922	0.000419829	0.208611	1
ENSG00000180926	-	-	-	A_23_P119152	-0.309964	7.16364	-4.43746	0.000421353	0.208611	1
ENSG00000182447	OTOL1	OTOL1_HUMAN	A6NHN0	A_24_P7467	0.420721	6.83889	4.41745	0.000439126	0.211172	1
ENSG00000159840	ZYX	ZYX_HUMAN	Q15942	A_23_P254888	-0.361397	12.6702	-4.40155	0.000453795	0.211172	1
ENSG00000185842	DNAH14	DYH14_HUMAN	Q0VDD8	A_24_P917290	0.376465	6.89148	4.39644	0.000458612	0.211172	1
ENSG00000183688	FAM101B	F101B_HUMAN	Q8N5W9	A_24_P32151	-0.486	8.75424	-4.39236	0.000462499	0.211172	1
ENSG00000148834	GSTO1	GSTO1_HUMAN	P78417	A_24_P304051	0.307673	14.0519	4.37978	0.000474687	0.212062	1
ENSG00000100055	CYTH4	CYH4_HUMAN	Q9UIA0	A_24_P74559	0.272216	7.06773	4.3797	0.00047477	0.212062	1
ENSG00000077348	EXOSC5	EXOS5_HUMAN	Q9NQT4	A_24_P211151	-0.360115	9.49385	-4.36091	0.000493592	0.218099	1
ENSG00000103671	TRIP4	TRIP4_HUMAN	Q15650	A_23_P152028	0.280028	11.2111	4.34549	0.000509612	0.220212	1
ENSG00000140941	MAP1LC3B	MLP3B_HUMAN	Q9GZQ8	A_24_P108005	0.359009	11.4622	4.34277	0.000512497	0.220212	1
ENSG00000165078	CPA6	CBPA6_HUMAN	Q8N4T0	A_24_P4170	-0.297112	6.99551	-4.34093	0.000514452	0.220212	1
ENSG00000144579	CTDSP1	CTDS1_HUMAN	Q9GZU7	A_23_P28263	0.427681	14.1731	4.31761	0.000539926	0.225277	1
ENSG00000144460	NYAP2	NYAP2_HUMAN	Q9P242	A_24_P49427	-0.377511	6.86044	-4.31145	0.000546873	0.225277	1
ENSG00000072110	ACTN1	ACTN1_HUMAN	P12814	A_23_P105957	-0.384933	13.1318	-4.30678	0.000552195	0.225277	1
ENSG00000264546	-	-	-	A_24_P848134	-0.318335	6.87502	-4.29857	0.000561685	0.225277	1
ENSG00000174574	AKIRIN1	AKIR1_HUMAN	Q9H9L7	A_23_P256142	-0.350127	9.94393	-4.29553	0.000565233	0.225277	1
ENSG00000237289	CKMT1A	KCRU_HUMAN	P12532	A_23_P163235	-0.471458	9.17513	-4.2926	0.000568682	0.225277	1
ENSG00000237289	CKMT1B	KCRU_HUMAN	P12532	A_23_P163235	-0.471458	9.17513	-4.2926	0.000568682	0.225277	1
ENSG00000223572	CKMT1A	KCRU_HUMAN	P12532	A_23_P163235	-0.471458	9.17513	-4.2926	0.000568682	0.225277	1
ENSG00000223572	CKMT1B	KCRU_HUMAN	P12532	A_23_P163235	-0.471458	9.17513	-4.2926	0.000568682	0.225277	1
ENSG00000120616	EPC1	EPC1_HUMAN	Q9H2F5	A_24_P252718	0.303903	9.91847	4.29137	0.000570141	0.225277	1
ENSG00000188782	CATSPER4	CTSR4_HUMAN	Q7RTX7	A_24_P786388	0.294333	6.87637	4.27904	0.000584923	0.228108	1
ENSG00000146386	ABRACL	ABRAL_HUMAN	Q9P1F3	A_32_P160972	-0.516502	13.0371	-4.27491	0.000589952	0.228108	1
ENSG00000165934	CPSF2	CPSF2_HUMAN	Q9P2I0	A_24_P82074	0.332589	7.12782	4.27022	0.000595739	0.228108	1
ENSG00000074370	ATP2A3	AT2A3_HUMAN	Q93084	A_23_P207632	-0.353572	7.77931	-4.26718	0.000599509	0.228108	1
ENSG00000184260	HIST2H2AC	H2A2C_HUMAN	Q16777	A_23_P301247	-0.450696	12.1856	-4.26106	0.000607183	0.228778	1
ENSG00000178096	BOLA1	BOLA1_HUMAN	Q9Y3E2	A_23_P301247	-0.450696	12.1856	-4.26106	0.000607183	0.228778	1
ENSG00000148444	COMMD3	COMD3_HUMAN	Q9UBI1	A_23_P138514	0.374251	11.3776	4.24218	0.000631481	0.228778	1
ENSG00000120885	CLU	CLUS_HUMAN	P10909	A_23_P215913	-0.657305	11.4592	-4.21995	0.000661366	0.236326	1
ENSG00000258988	-	-	-	A_23_P35131	-0.270069	8.58653	-4.21172	0.000672791	0.237168	1
ENSG00000143368	SF3B4	SF3B4_HUMAN	Q15427	A_23_P35131	-0.270069	8.58653	-4.21172	0.000672791	0.237168	1
ENSG00000102539	MLNR	MTLR_HUMAN	O43193	A_23_P36905	-0.336228	6.95902	-4.20134	0.000687488	0.237168	1
ENSG00000204531	POU5F1	PO5F1_HUMAN	Q01860	A_32_P132563	-0.581101	13.8554	-4.19377	0.000698413	0.237168	1
ENSG00000206454	POU5F1	PO5F1_HUMAN	Q01860	A_32_P132563	-0.581101	13.8554	-4.19377	0.000698413	0.237168	1
ENSG00000235068	POU5F1	PO5F1_HUMAN	Q01860	A_32_P132563	-0.581101	13.8554	-4.19377	0.000698413	0.237168	1
ENSG00000235602	-	-	-	A_32_P132563	-0.581101	13.8554	-4.19377	0.000698413	0.237168	1
ENSG00000229094	POU5F1	PO5F1_HUMAN	Q01860	A_32_P132563	-0.581101	13.8554	-4.19377	0.000698413	0.237168	1
ENSG00000237582	POU5F1	PO5F1_HUMAN	Q01860	A_32_P132563	-0.581101	13.8554	-4.19377	0.000698413	0.237168	1
ENSG00000233911	POU5F1	PO5F1_HUMAN	Q01860	A_32_P132563	-0.581101	13.8554	-4.19377	0.000698413	0.237168	1
ENSG00000237872	-	-	-	A_32_P132563	-0.581101	13.8554	-4.19377	0.000698413	0.237168	1
ENSG00000230336	POU5F1	PO5F1_HUMAN	Q01860	A_32_P132563	-0.581101	13.8554	-4.19377	0.000698413	0.237168	1
ENSG00000112981	NME5	NDK5_HUMAN	P56597	A_23_P156402	0.297261	8.39823	4.1877	0.000707297	0.237168	1
ENSG00000168710	AHCYL1	SAHH2_HUMAN	O43865	A_24_P11307	-0.287399	10.0541	-4.18483	0.00071154	0.237168	1
ENSG00000066294	CD84	SLAF5_HUMAN	Q9UIB8	A_32_P58215	-0.395548	6.92817	-4.18451	0.000712018	0.237168	1
ENSG00000156011	PSD3	PSD3_HUMAN	Q9NYI0	A_23_P216167	-0.354139	8.70942	-4.18164	0.00071628	0.237168	1
ENSG00000120519	SLC10A7	NTCP7_HUMAN	Q0GE19	A_23_P213085	0.359198	7.91183	4.18099	0.000717254	0.237168	1
ENSG00000156304	SCAF4	SFR15_HUMAN	O95104	A_23_P6223	-0.379262	9.23828	-4.17684	0.000723487	0.237168	1
ENSG00000143390	RFX5	RFX5_HUMAN	P48382	A_24_P20032	0.241552	10.1894	4.17336	0.000728745	0.237168	1
ENSG00000163646	CLRN1	CLRN1_HUMAN	P58418	A_23_P328709	0.340776	6.95893	4.17058	0.000732979	0.237168	1
ENSG00000121060	TRIM25	TRI25_HUMAN	Q14258	A_24_P936767	-0.342279	7.77004	-4.15547	0.000756439	0.240681	1
ENSG00000142252	GEMIN7	GEMI7_HUMAN	Q9H840	A_23_P89910	0.422639	12.2059	4.15447	0.000758009	0.240681	1
ENSG00000182963	DKFZp686P0738	CXG1_HUMAN	P36383	A_23_P428287	-0.454901	9.96652	-4.14918	0.00076643	0.240681	1
ENSG00000182963	GJC1	CXG1_HUMAN	P36383	A_23_P428287	-0.454901	9.96652	-4.14918	0.00076643	0.240681	1
ENSG00000132688	NES	NEST_HUMAN	P48681	A_23_P103672	-0.452756	13.6756	-4.14161	0.000778631	0.240681	1
ENSG00000111405	ENDOU	ENDOU_HUMAN	P21128	A_24_P52887	0.379568	6.92828	4.14139	0.000778978	0.240681	1
ENSG00000141956	PRDM15	PRD15_HUMAN	P57071	A_32_P145989	-0.275055	7.03654	-4.13127	0.000795604	0.243153	1
ENSG00000141956	ZNF298	PRD15_HUMAN	P57071	A_32_P145989	-0.275055	7.03654	-4.13127	0.000795604	0.243153	1
ENSG00000173621	LRFN4	LRFN4_HUMAN	Q6PJG9	A_23_P63980	-0.331299	11.2886	-4.12687	0.000802939	0.243153	1
ENSG00000131779	PEX11B	PX11B_HUMAN	O96011	A_24_P88554	0.263963	9.58376	4.12323	0.000809057	0.243153	1
ENSG00000183888	C1orf64	CA064_HUMAN	Q8NEQ6	A_32_P232455	0.32753	8.80443	4.11636	0.000820756	0.243153	1
ENSG00000215873	-	-	-	A_24_P84898	-0.305269	10.9951	-4.11614	0.000821123	0.243153	1
ENSG00000006625	GGCT	GGCT_HUMAN	O75223	A_23_P42695	-0.311963	12.5864	-4.11535	0.000822483	0.243153	1
ENSG00000086475	SEPHS1	SPS1_HUMAN	P49903	A_23_P150092	-0.4222	14.1718	-4.10569	0.000839247	0.244493	1
ENSG00000249101	-	-	-	A_23_P150092	-0.4222	14.1718	-4.10569	0.000839247	0.244493	1
ENSG00000230146	-	-	-	A_23_P150092	-0.4222	14.1718	-4.10569	0.000839247	0.244493	1
ENSG00000236751	-	-	-	A_24_P384969	0.255392	7.37255	4.10513	0.000840216	0.244493	1
ENSG00000144645	OSBPL10	OSB10_HUMAN	Q9BXB5	A_24_P117902	-0.403319	8.51852	-4.1011	0.000847318	0.244493	1
ENSG00000117399	CDC20	CDC20_HUMAN	Q12834	A_23_P149200	-0.302546	11.6762	-4.09913	0.000850813	0.244493	1
ENSG00000154153	FAM134B	F134B_HUMAN	Q9H6L5	A_23_P167599	0.303985	9.38208	4.09567	0.00085698	0.244555	1
ENSG00000235026	-	-	-	A_32_P86578	0.41511	9.97018	4.08686	0.000872905	0.246123	1
ENSG00000224025	-	-	-	A_24_P871726	-0.332866	8.87945	-4.08225	0.000881352	0.246123	1
ENSG00000213047	DENND1B	DEN1B_HUMAN	Q6P3S1	A_32_P204330	0.264663	8.60653	4.07544	0.000893991	0.246123	1
ENSG00000159176	CSRP1	CSRP1_HUMAN	P21291	A_23_P74359	-0.41829	8.51086	-4.07374	0.000897171	0.246123	1
ENSG00000118564	FBXL5	FBXL5_HUMAN	Q9UKA1	A_23_P213247	0.297715	10.9285	4.07316	0.000898258	0.246123	1
ENSG00000196263	ZNF471	ZN471_HUMAN	Q9BX82	A_32_P45351	-0.29877	6.94823	-4.07308	0.000898412	0.246123	1
ENSG00000135324	MRAP2	MRAP2_HUMAN	Q96G30	A_23_P357207	0.339797	10.0603	4.06769	0.000908582	0.246142	1
ENSG00000269210	-	-	-	A_24_P349750	0.354917	7.16447	4.05985	0.000923604	0.246142	1
ENSG00000174720	LARP7	LARP7_HUMAN	Q4G0J3	A_24_P332230	-0.388031	7.77778	-4.05822	0.000926755	0.246142	1
ENSG00000175155	YPEL2	YPEL2_HUMAN	Q96QA6	A_24_P787947	0.296434	9.67605	4.05407	0.000934831	0.246142	1
ENSG00000156500	FAM122C	F222C_HUMAN	Q6P4D5	A_23_P340188	0.267002	8.6482	4.04756	0.000947647	0.246142	1
ENSG00000156500	RP3-473B4.1	F222C_HUMAN	Q6P4D5	A_23_P340188	0.267002	8.6482	4.04756	0.000947647	0.246142	1
ENSG00000182866	LCK	LCK_HUMAN	P06239	A_23_P103361	-0.539806	8.9802	-4.0424	0.000957927	0.246142	1
ENSG00000111817	DSE	DSE_HUMAN	Q9UL01	A_23_P19226	-0.379793	11.3753	-4.04019	0.000962361	0.246142	1
ENSG00000169213	RAB3B	RAB3B_HUMAN	P20337	A_24_P933319	0.30758	12.4364	4.0392	0.000964369	0.246142	1
ENSG00000237016	-	-	-	A_24_P281285	-0.300943	6.91925	-4.03199	0.000979024	0.24834	1
ENSG00000184697	CLDN6	CLD6_HUMAN	P56747	A_23_P37942	-0.37085	13.4701	-4.02498	0.000993486	0.250462	1
ENSG00000167654	ATCAY	ATCAY_HUMAN	Q86WG3	A_23_P101671	-0.441183	10.2117	-4.02022	0.00100342	0.250478	1
ENSG00000127824	TUBA4A	TBA4A_HUMAN	P68366	A_23_P84448	-0.3682	9.28875	-4.01912	0.00100574	0.250478	1
ENSG00000243910	-	-	-	A_23_P84448	-0.3682	9.28875	-4.01912	0.00100574	0.250478	1
ENSG00000115592	PRKAG3	AAKG3_HUMAN	Q9UGI9	A_23_P28258	0.343853	6.84484	4.01573	0.0010129	0.250742	1
ENSG00000179344	HLA-DQB1	-	-	A_23_P136683	0.242662	8.57852	4.00736	0.0010308	0.251183	1
ENSG00000126461	SCAF1	SFR19_HUMAN	Q9H7N4	A_24_P117672	-0.321633	9.5598	-4.00511	0.00103568	0.251183	1
ENSG00000138193	PLCE1	PLCE1_HUMAN	Q9P212	A_23_P35617	0.438948	11.4215	4.00104	0.00104454	0.251183	1
ENSG00000181449	SOX2	SOX2_HUMAN	P48431	A_24_P379969	-0.578818	11.7679	-3.99617	0.00105525	0.251183	1
ENSG00000155366	RHOC	RHOC_HUMAN	P08134	A_23_P12514	0.303086	14.7427	3.99537	0.00105701	0.251183	1
ENSG00000149054	ZNF215	ZN215_HUMAN	Q9UL58	A_23_P53057	-0.273087	9.22518	-3.99087	0.00106702	0.251183	1
ENSG00000011677	GABRA3	GBRA3_HUMAN	P34903	A_23_P125618	-0.257902	7.24197	-3.99073	0.00106734	0.251183	1
ENSG00000165168	CYBB	CY24B_HUMAN	P04839	A_24_P365767	-0.279395	6.91473	-3.98584	0.00107833	0.251183	1
ENSG00000129691	ASH2L	ASH2L_HUMAN	Q9UBL3	A_23_P134827	0.344167	13.4298	3.9788	0.00109434	0.251183	1
ENSG00000167600	CYP2S1	CP2S1_HUMAN	Q96SQ9	A_23_P101374	-0.55829	10.6337	-3.97799	0.00109619	0.251183	1
ENSG00000168286	THAP11	THA11_HUMAN	Q96EK4	A_24_P365954	-0.284898	9.24134	-3.97763	0.00109703	0.251183	1
ENSG00000143199	ADCY10	ADCYA_HUMAN	Q96PN6	A_23_P126313	0.311964	7.0595	3.97417	0.00110501	0.251183	1
ENSG00000113356	POLR3G	RPC7_HUMAN	O15318	A_23_P41942	-0.43331	9.37924	-3.96748	0.00112062	0.251183	1
ENSG00000186047	DLEU7	LEU7_HUMAN	Q6UYE1	A_32_P50326	0.243203	7.01311	3.96743	0.00112073	0.251183	1
ENSG00000267465	-	-	-	A_32_P99638	-0.287093	6.98155	-3.96683	0.00112213	0.251183	1
ENSG00000116962	NID1	NID1_HUMAN	P14543	A_23_P200928	-0.268817	7.64886	-3.96592	0.00112429	0.251183	1
ENSG00000134709	HOOK1	HOOK1_HUMAN	Q9UJC3	A_23_P114879	-0.315933	8.60768	-3.96574	0.00112471	0.251183	1
ENSG00000148735	PLEKHS1	PKHS1_HUMAN	Q5SXH7	A_24_P286951	-0.261726	6.85926	-3.95426	0.0011521	0.252128	1
ENSG00000179761	PIPOX	SOX_HUMAN	Q9P0Z9	A_23_P164258	-0.323507	8.33567	-3.94441	0.00117612	0.252128	1
ENSG00000203805	PPAPDC1A	PPC1A_HUMAN	Q5VZY2	A_24_P810290	0.352602	10.3812	3.93148	0.00120845	0.252128	1
ENSG00000130768	SMPDL3B	ASM3B_HUMAN	Q92485	A_23_P160881	-0.544271	9.94204	-3.93028	0.00121149	0.252128	1
ENSG00000138629	UBL7	UBL7_HUMAN	Q96S82	A_23_P117778	-0.312514	10.2101	-3.92952	0.00121343	0.252128	1
ENSG00000100297	MCM5	MCM5_HUMAN	P33992	A_23_P132277	-0.281604	12.7101	-3.92378	0.00122813	0.252128	1
ENSG00000141349	G6PC3	G6PC3_HUMAN	Q9BUM1	A_23_P55174	-0.294354	10.0344	-3.91129	0.00126074	0.252128	1
ENSG00000185294	SPPL2C	SPP2C_HUMAN	Q8IUH8	A_32_P142779	-0.393513	7.03906	-3.90838	0.00126844	0.252128	1
ENSG00000103061	SLC7A6OS	S7A6O_HUMAN	Q96CW6	A_23_P3562	0.284221	10.7693	3.90813	0.00126911	0.252128	1
ENSG00000166387	PPFIBP2	LIPB2_HUMAN	Q8ND30	A_23_P150807	0.381701	11.6115	3.90572	0.00127555	0.252128	1
ENSG00000064419	TNPO3	TNPO3_HUMAN	Q9Y5L0	A_23_P42563	-0.322816	9.48034	-3.90538	0.00127646	0.252128	1
ENSG00000097021	ACOT7	BACH_HUMAN	O00154	A_24_P205589	-0.354479	12.9902	-3.90258	0.00128399	0.252128	1
ENSG00000151704	KCNJ1	KCNJ1_HUMAN	P48048	A_23_P501781	0.309749	7.16642	3.89882	0.00129415	0.252128	1
ENSG00000182722	-	-	-	A_24_P118452	-0.36436	10.266	-3.89747	0.00129782	0.252128	1
ENSG00000196236	XPNPEP3	XPP3_HUMAN	Q9NQH7	A_24_P923629	0.402618	8.46462	3.89709	0.00129886	0.252128	1
ENSG00000137720	C11orf1	CK001_HUMAN	Q9H5F2	A_24_P406939	-0.347959	6.82783	-3.89665	0.00130006	0.252128	1
ENSG00000197647	ZNF433	ZN433_HUMAN	Q8N7K0	A_23_P27649	0.267817	8.40025	3.89381	0.00130783	0.252128	1
ENSG00000218336	TENM3	TEN3_HUMAN	Q9P273	A_24_P911420	-0.238956	9.27463	-3.89163	0.00131382	0.252128	1
ENSG00000185652	NTF3	NTF3_HUMAN	P20783	A_23_P360797	0.271153	8.42658	3.89152	0.00131413	0.252128	1
ENSG00000137076	TLN1	TLN1_HUMAN	Q9Y490	A_24_P196851	-0.368829	9.77629	-3.88966	0.00131926	0.252128	1
ENSG00000165457	FOLR2	FOLR2_HUMAN	P14207	A_23_P47709	0.274361	7.18887	3.88821	0.00132328	0.252128	1
ENSG00000243449	C4orf48	CD048_HUMAN	Q5BLP8	A_32_P90047	0.300238	13.9131	3.88134	0.00134251	0.252128	1
ENSG00000166736	HTR3A	5HT3A_HUMAN	P46098	A_23_P98399	-0.306289	7.75158	-3.88073	0.00134422	0.252128	1
ENSG00000182957	SPATA13	SPT13_HUMAN	Q96N96	A_23_P390116	-0.556707	9.56293	-3.87574	0.00135838	0.252128	1
ENSG00000237675	-	-	-	A_32_P120127	0.243575	7.02529	3.87508	0.00136026	0.252128	1
ENSG00000165494	PCF11	PCF11_HUMAN	O94913	A_24_P835763	0.282831	8.87033	3.87425	0.00136265	0.252128	1
ENSG00000138698	RAP1GDS1	GDS1_HUMAN	P52306	A_32_P85813	0.289306	10.2741	3.87309	0.00136597	0.252128	1
ENSG00000071054	MAP4K4	-	-	A_23_P102192	-0.337675	10.101	-3.87252	0.0013676	0.252128	1
ENSG00000261548	-	-	-	A_23_P338113	-0.260029	9.49217	-3.87243	0.00136787	0.252128	1
ENSG00000107968	MAP3K8	M3K8_HUMAN	P41279	A_23_P23947	0.307685	8.59461	3.86953	0.00137622	0.252128	1
ENSG00000179059	ZFP42	ZFP42_HUMAN	Q96MM3	A_23_P395582	-0.337201	13.1656	-3.86889	0.00137806	0.252128	1
ENSG00000143632	ACTA1	ACTS_HUMAN	P68133	A_23_P1102	-0.567839	13.721	-3.86846	0.0013793	0.252128	1
ENSG00000269741	KLK9	KLK9_HUMAN	Q9UKQ9	A_23_P369343	-0.414231	8.46546	-3.86456	0.00139065	0.252128	1
ENSG00000129455	KLK8	KLK8_HUMAN	O60259	A_23_P369343	-0.414231	8.46546	-3.86456	0.00139065	0.252128	1
ENSG00000147394	ZNF185	ZN185_HUMAN	O15231	A_23_P11025	0.31715	9.83972	3.86245	0.00139683	0.252128	1
ENSG00000237499	-	-	-	A_32_P235358	-0.306912	6.96942	-3.86207	0.00139794	0.252128	1
ENSG00000174136	RGMB	RGMB_HUMAN	Q6NW40	A_23_P58796	0.260896	9.92269	3.85903	0.00140688	0.252128	1
ENSG00000132819	RBM38	RBM38_HUMAN	Q9H0Z9	A_24_P14485	-0.314607	7.83872	-3.85888	0.00140732	0.252128	1
ENSG00000198113	TOR4A	TOR4A_HUMAN	Q9NXH8	A_23_P147109	-0.278348	8.42016	-3.85699	0.00141293	0.252128	1
ENSG00000188219	POTEE	POTEE_HUMAN	Q6S8J3	A_24_P59220	-0.309515	15.2526	-3.85359	0.00142305	0.252128	1
ENSG00000222038	POTEJ	POTEJ_HUMAN	P0CG39	A_24_P59220	-0.309515	15.2526	-3.85359	0.00142305	0.252128	1
ENSG00000196604	POTEF	POTEF_HUMAN	A5A3E0	A_24_P59220	-0.309515	15.2526	-3.85359	0.00142305	0.252128	1
ENSG00000196834	POTEI	POTEI_HUMAN	P0CG38	A_24_P59220	-0.309515	15.2526	-3.85359	0.00142305	0.252128	1
ENSG00000161542	PRPSAP1	KPRA_HUMAN	Q14558	A_23_P15305	0.303142	11.4411	3.85307	0.00142461	0.252128	1
ENSG00000279332	-	-	-	A_32_P168756	-0.312539	7.49915	-3.85196	0.00142793	0.252128	1
ENSG00000135637	CCDC142	CC142_HUMAN	Q17RM4	A_23_P102258	0.258699	13.0334	3.85151	0.00142928	0.252128	1
ENSG00000204822	MRPL53	RM53_HUMAN	Q96EL3	A_23_P102258	0.258699	13.0334	3.85151	0.00142928	0.252128	1
ENSG00000009724	MASP2	MASP2_HUMAN	O00187	A_23_P301971	-0.240102	7.6636	-3.84674	0.00144368	0.252128	1
ENSG00000175387	SMAD2	SMAD2_HUMAN	Q15796	A_24_P202527	0.279362	11.4183	3.84547	0.00144752	0.252128	1
ENSG00000130822	PNCK	KCC1B_HUMAN	Q6P2M8	A_23_P62377	-0.263228	7.30872	-3.84436	0.0014509	0.252128	1
ENSG00000144355	DLX1	DLX1_HUMAN	P56177	A_32_P142818	-0.275253	6.87669	-3.84317	0.00145454	0.252128	1
ENSG00000173320	STOX2	STOX2_HUMAN	Q9P2F5	A_24_P163237	-0.512771	10.5798	-3.84253	0.00145649	0.252128	1
ENSG00000153786	ZDHHC7	ZDHC7_HUMAN	Q9NXF8	A_24_P373297	0.250744	11.9498	3.84124	0.00146044	0.252128	1
ENSG00000121957	GPSM2	GPSM2_HUMAN	P81274	A_24_P658505	0.272345	7.81693	3.83837	0.00146927	0.252128	1
ENSG00000119899	SLC17A5	S17A5_HUMAN	Q9NRA2	A_23_P110896	-0.27515	8.17425	-3.83628	0.00147575	0.252128	1
ENSG00000181090	EHMT1	EHMT1_HUMAN	Q9H9B1	A_23_P20894	-0.386552	8.83588	-3.83534	0.00147866	0.252128	1
ENSG00000101057	MYBL2	MYBB_HUMAN	P10244	A_23_P143190	-0.292619	11.2509	-3.83058	0.00149352	0.253608	1
ENSG00000154845	PPP4R1	PP4R1_HUMAN	Q8TF05	A_23_P15857	-0.356116	9.26905	-3.82818	0.00150107	0.253841	1
ENSG00000163440	PDCL2	PDCL2_HUMAN	Q8N4E4	A_23_P363301	-0.254814	7.1677	-3.82167	0.00152176	0.255239	1
ENSG00000173473	SMARCC1	SMRC1_HUMAN	Q92922	A_23_P83453	-0.243618	11.9775	-3.81814	0.00153307	0.25609	1
ENSG00000173889	PHC3	PHC3_HUMAN	Q8NDX5	A_24_P265177	-0.328585	6.96499	-3.8069	0.0015697	0.260095	1
ENSG00000179051	RCC2	RCC2_HUMAN	Q9P258	A_23_P74954	-0.277013	10.9389	-3.80421	0.00157861	0.260121	1
ENSG00000167257	RNF214	RN214_HUMAN	Q8ND24	A_24_P32520	0.241771	9.15044	3.8017	0.00158696	0.260121	1
ENSG00000187800	PEAR1	PEAR1_HUMAN	Q5VY43	A_24_P943301	-0.314832	7.22079	-3.80114	0.00158884	0.260121	1
ENSG00000230578	-	-	-	A_23_P217546	0.250688	10.0674	3.79488	0.00160986	0.262516	1
ENSG00000185973	TMLHE	TMLH_HUMAN	Q9NVH6	A_23_P217546	0.250688	10.0674	3.79488	0.00160986	0.262516	1
ENSG00000269404	SPIB	SPIB_HUMAN	Q01892	A_23_P39067	-0.547387	9.59296	-3.79204	0.00161952	0.263047	1
ENSG00000158683	PKD1L1	PK1L1_HUMAN	Q8TDX9	A_24_P922569	0.310353	6.98442	3.78393	0.00164735	0.264129	1
ENSG00000104447	TRPS1	TRPS1_HUMAN	Q9UHF7	A_23_P134755	0.229671	7.55032	3.77973	0.00166198	0.264129	1
ENSG00000183688	FAM101B	F101B_HUMAN	Q8N5W9	A_24_P299318	-0.52086	11.1566	-3.77945	0.00166294	0.264129	1
ENSG00000228868	-	-	-	A_24_P600036	-0.310862	7.2441	-3.77774	0.00166895	0.264129	1
ENSG00000169154	GOT1L1	AATC2_HUMAN	Q8NHS2	A_23_P9075	-0.312667	7.02458	-3.76828	0.00170248	0.264129	1
ENSG00000251191	-	-	-	A_24_P333532	-0.240752	6.98439	-3.7679	0.00170381	0.264129	1
ENSG00000148136	OR13C4	O13C4_HUMAN	Q8NGS5	A_23_P169207	-0.302287	7.08797	-3.76578	0.00171144	0.264129	1
ENSG00000198216	CACNA1E	CAC1E_HUMAN	Q15878	A_24_P911621	-0.314965	6.98722	-3.76404	0.00171771	0.264129	1
ENSG00000253948	-	-	-	A_32_P144629	0.271541	8.56875	3.76294	0.00172167	0.264129	1
ENSG00000127870	RNF6	RNF6_HUMAN	Q9Y252	A_23_P162734	0.302755	9.91089	3.76286	0.00172198	0.264129	1
ENSG00000204469	PRRC2A	PRC2A_HUMAN	P48634	A_23_P30870	-0.403887	10.5601	-3.7593	0.00173493	0.264129	1
ENSG00000152377	SPOCK1	TICN1_HUMAN	Q08629	A_24_P354689	0.440052	10.2267	3.75803	0.00173956	0.264129	1
ENSG00000170854	MINA	MINA_HUMAN	Q8IUF8	A_24_P388570	-0.237682	7.56699	-3.75779	0.00174045	0.264129	1
ENSG00000181638	ZFP41	ZFP41_HUMAN	Q8N8Y5	A_24_P16606	0.274683	7.02512	3.75764	0.00174099	0.264129	1
ENSG00000165084	C8orf34	CH034_HUMAN	Q49A92	A_23_P73311	0.314001	8.69128	3.75422	0.00175356	0.264129	1
ENSG00000196260	SFTA2	SFTA2_HUMAN	Q6UW10	A_24_P149248	-0.363841	7.04918	-3.75394	0.00175457	0.264129	1
ENSG00000230072	SFTA2	SFTA2_HUMAN	Q6UW10	A_24_P149248	-0.363841	7.04918	-3.75394	0.00175457	0.264129	1
ENSG00000206465	SFTA2	SFTA2_HUMAN	Q6UW10	A_24_P149248	-0.363841	7.04918	-3.75394	0.00175457	0.264129	1
ENSG00000225454	SFTA2	SFTA2_HUMAN	Q6UW10	A_24_P149248	-0.363841	7.04918	-3.75394	0.00175457	0.264129	1
ENSG00000237814	SFTA2	SFTA2_HUMAN	Q6UW10	A_24_P149248	-0.363841	7.04918	-3.75394	0.00175457	0.264129	1
ENSG00000224246	-	-	-	A_24_P149248	-0.363841	7.04918	-3.75394	0.00175457	0.264129	1
ENSG00000166851	PLK1	PLK1_HUMAN	P53350	A_23_P118174	-0.301652	10.4266	-3.74804	0.0017765	0.264129	1
ENSG00000105426	PTPRS	PTPRS_HUMAN	Q13332	A_23_P56163	-0.31001	8.47092	-3.74671	0.00178147	0.264129	1
ENSG00000166734	CASC4	CASC4_HUMAN	Q6P4E1	A_24_P398940	0.256294	10.4462	3.74263	0.0017968	0.264129	1
ENSG00000180198	RCC1	RCC1_HUMAN	P18754	A_23_P46309	-0.290482	9.34808	-3.74261	0.0017969	0.264129	1
ENSG00000164171	ITGA2	ITA2_HUMAN	P17301	A_32_P208076	-0.275063	7.82436	-3.74231	0.00179803	0.264129	1
ENSG00000086015	MAST2	MAST2_HUMAN	Q6P0Q8	A_23_P126008	-0.256934	10.0096	-3.73818	0.00181372	0.264129	1
ENSG00000171135	JAGN1	JAGN1_HUMAN	Q8N5M9	A_23_P6762	0.23028	12.9677	3.73644	0.00182036	0.264129	1
ENSG00000204531	POU5F1	PO5F1_HUMAN	Q01860	A_24_P144601	-0.512974	14.0716	-3.7353	0.00182474	0.264129	1
ENSG00000206454	POU5F1	PO5F1_HUMAN	Q01860	A_24_P144601	-0.512974	14.0716	-3.7353	0.00182474	0.264129	1
ENSG00000235068	POU5F1	PO5F1_HUMAN	Q01860	A_24_P144601	-0.512974	14.0716	-3.7353	0.00182474	0.264129	1
ENSG00000212993	POU5F1B	P5F1B_HUMAN	Q06416	A_24_P144601	-0.512974	14.0716	-3.7353	0.00182474	0.264129	1
ENSG00000235602	-	-	-	A_24_P144601	-0.512974	14.0716	-3.7353	0.00182474	0.264129	1
ENSG00000229094	POU5F1	PO5F1_HUMAN	Q01860	A_24_P144601	-0.512974	14.0716	-3.7353	0.00182474	0.264129	1
ENSG00000237582	POU5F1	PO5F1_HUMAN	Q01860	A_24_P144601	-0.512974	14.0716	-3.7353	0.00182474	0.264129	1
ENSG00000233911	POU5F1	PO5F1_HUMAN	Q01860	A_24_P144601	-0.512974	14.0716	-3.7353	0.00182474	0.264129	1
ENSG00000230336	POU5F1	PO5F1_HUMAN	Q01860	A_24_P144601	-0.512974	14.0716	-3.7353	0.00182474	0.264129	1
ENSG00000084628	NKAIN1	NKAI1_HUMAN	Q4KMZ8	A_23_P51376	-0.426874	10.7224	-3.73528	0.00182482	0.264129	1
ENSG00000100416	TRMU	MTU1_HUMAN	O75648	A_24_P916195	-0.303806	9.7217	-3.73512	0.00182543	0.264129	1
ENSG00000104853	CLPTM1	CLPT1_HUMAN	O96005	A_23_P50241	-0.361088	10.3181	-3.73164	0.00183884	0.265135	1
ENSG00000096264	NCR2	NCTR2_HUMAN	O95944	A_23_P413224	0.233847	7.14056	3.72886	0.0018496	0.265754	1
ENSG00000005156	LIG3	DNLI3_HUMAN	P49916	A_23_P501134	-0.318489	8.78832	-3.72617	0.0018601	0.266331	1
ENSG00000100985	MMP9	MMP9_HUMAN	P14780	A_23_P40174	-0.385138	9.12529	-3.71811	0.00189191	0.266464	1
ENSG00000059769	DNAJC25	DJC25_HUMAN	Q9H1X3	A_23_P397019	0.232522	8.303	3.71794	0.00189258	0.266464	1
ENSG00000215859	-	-	-	A_23_P52121	0.356025	11.0149	3.71463	0.00190584	0.266464	1
ENSG00000244211	-	-	-	A_23_P52121	0.356025	11.0149	3.71463	0.00190584	0.266464	1
ENSG00000174827	PDZK1	NHRF3_HUMAN	Q5T2W1	A_23_P52121	0.356025	11.0149	3.71463	0.00190584	0.266464	1
ENSG00000231121	-	-	-	A_32_P140009	-0.333149	6.98744	-3.71435	0.00190695	0.266464	1
ENSG00000174498	IGDCC3	IGDC3_HUMAN	Q8IVU1	A_23_P3274	-0.312544	9.43088	-3.71152	0.00191832	0.266464	1
ENSG00000121210	KIAA0922	T131L_HUMAN	A2VDJ0	A_23_P257250	-0.285529	7.94199	-3.70646	0.00193886	0.266464	1
ENSG00000143515	ATP8B2	AT8B2_HUMAN	P98198	A_24_P117896	-0.334458	8.31655	-3.70401	0.00194889	0.266464	1
ENSG00000244754	N4BP2L2	N42L2_HUMAN	Q92802	A_23_P65262	0.274509	8.1678	3.70386	0.0019495	0.266464	1
ENSG00000182613	OR2V2	OR2V2_HUMAN	Q96R30	A_23_P18913	0.304464	7.01424	3.69993	0.0019657	0.266464	1
ENSG00000260776	-	-	-	A_24_P392030	0.339011	7.08528	3.69736	0.00197634	0.266464	1
ENSG00000272670	-	-	-	A_24_P236753	0.321922	7.07068	3.69689	0.00197831	0.266464	1
ENSG00000272636	DOC2B	-	-	A_24_P236753	0.321922	7.07068	3.69689	0.00197831	0.266464	1
ENSG00000182054	IDH2	IDHP_HUMAN	P48735	A_23_P129209	-0.38781	9.684	-3.69556	0.00198384	0.266464	1
ENSG00000141456	PELP1	PELP1_HUMAN	Q8IZL8	A_23_P49900	-0.271963	11.6662	-3.6955	0.0019841	0.266464	1
ENSG00000072518	MARK2	MARK2_HUMAN	Q7KZI7	A_23_P161595	-0.294832	11.5002	-3.69426	0.00198926	0.266464	1
ENSG00000112183	RBM24	RBM24_HUMAN	Q9BX46	A_23_P167812	0.354616	8.91755	3.69391	0.00199074	0.266464	1
ENSG00000163032	VSNL1	VISL1_HUMAN	P62760	A_23_P209978	-0.535519	9.60013	-3.69059	0.0020047	0.266464	1
ENSG00000268628	-	-	-	A_32_P459529	-0.330822	7.04279	-3.68913	0.00201088	0.266464	1
ENSG00000157637	SLC38A10	S38AA_HUMAN	Q9HBR0	A_23_P55011	0.24963	12.6209	3.68829	0.00201444	0.266464	1
ENSG00000118690	ARMC2	ARMC2_HUMAN	Q8NEN0	A_24_P320604	-0.346613	7.03932	-3.68663	0.00202148	0.266464	1
ENSG00000221988	PPT2	PPT2_HUMAN	Q9UMR5	A_23_P42116	0.382442	12.7971	3.68604	0.00202397	0.266464	1
ENSG00000119335	SET	SET_HUMAN	Q01105	A_23_P217015	-0.265214	11.0833	-3.68472	0.00202962	0.266464	1
ENSG00000141858	SAMD1	-	-	A_23_P435941	-0.292608	9.57076	-3.68242	0.00203946	0.266903	1
ENSG00000160584	SIK3	SIK3_HUMAN	Q9Y2K2	A_24_P329924	0.327206	9.24884	3.67714	0.00206225	0.267853	1
ENSG00000139780	METTL21C	MT21C_HUMAN	Q5VZV1	A_32_P97253	0.278634	7.08368	3.67622	0.00206624	0.267853	1
ENSG00000160746	ANO10	ANO10_HUMAN	Q9NW15	A_23_P6688	-0.27663	10.0134	-3.67503	0.0020714	0.267853	1
ENSG00000186470	BTN3A2	BT3A2_HUMAN	P78410	A_24_P252078	-0.295193	7.34357	-3.67412	0.00207539	0.267853	1
ENSG00000197343	ZNF655	ZN655_HUMAN	Q8N720	A_23_P345081	0.262056	11.0287	3.67226	0.00208352	0.267853	1
ENSG00000258610	-	-	-	A_23_P77000	0.349409	10.6919	3.66788	0.00210282	0.267853	1
ENSG00000071246	VASH1	VASH1_HUMAN	Q7L8A9	A_23_P77000	0.349409	10.6919	3.66788	0.00210282	0.267853	1
ENSG00000142552	RCN3	RCN3_HUMAN	Q96D15	A_23_P67339	-0.307141	8.06196	-3.66596	0.00211133	0.267853	1
ENSG00000162852	CNST	CNST_HUMAN	Q6PJW8	A_23_P405175	-0.320595	8.78723	-3.66387	0.00212064	0.267853	1
ENSG00000183255	PTTG1IP	PTTG_HUMAN	P53801	A_23_P109345	0.283653	13.913	3.6637	0.00212138	0.267853	1
ENSG00000269378	-	-	-	A_23_P104193	-0.322596	12.3064	-3.65913	0.00214189	0.267853	1
ENSG00000150093	ITGB1	ITB1_HUMAN	P05556	A_23_P104193	-0.322596	12.3064	-3.65913	0.00214189	0.267853	1
ENSG00000106631	MYL7	MLRA_HUMAN	Q01449	A_23_P59738	0.337091	14.5666	3.65909	0.00214208	0.267853	1
ENSG00000130741	EIF2S3	IF2G_HUMAN	P41091	A_23_P137031	-0.243803	9.85627	-3.65869	0.00214386	0.267853	1
ENSG00000180574	-	-	-	A_23_P137031	-0.243803	9.85627	-3.65869	0.00214386	0.267853	1
ENSG00000159788	RGS12	RGS12_HUMAN	O14924	A_24_P33705	-0.240701	7.53703	-3.65856	0.00214449	0.267853	1
ENSG00000134308	YWHAQ	1433T_HUMAN	P27348	A_32_P202057	-0.292792	15.4043	-3.65562	0.00215777	0.268486	1
ENSG00000163374	DKFZp686J14104	YYAP1_HUMAN	Q9H869	A_23_P103661	0.268541	11.8046	3.65445	0.00216311	0.268486	1
ENSG00000163374	YY1AP1	YYAP1_HUMAN	Q9H869	A_23_P103661	0.268541	11.8046	3.65445	0.00216311	0.268486	1
ENSG00000182022	CHST15	CHSTF_HUMAN	Q7LFX5	A_23_P383986	0.252687	9.75554	3.65089	0.00217936	0.268486	1
ENSG00000061936	SFSWAP	SFSWA_HUMAN	Q12872	A_32_P109704	-0.258698	10.2192	-3.64819	0.00219177	0.268486	1
ENSG00000165821	SALL2	SALL2_HUMAN	Q9Y467	A_23_P48585	-0.296095	13.8037	-3.64672	0.0021986	0.268486	1
ENSG00000183484	GPR132	GP132_HUMAN	Q9UNW8	A_24_P201994	-0.233659	7.09297	-3.64586	0.00220258	0.268486	1
ENSG00000132326	PER2	PER2_HUMAN	O15055	A_23_P411162	-0.279733	7.76832	-3.64575	0.00220305	0.268486	1
ENSG00000168137	SETD5	SETD5_HUMAN	Q9C0A6	A_23_P92035	-0.274404	10.1239	-3.64108	0.00222481	0.268486	1
ENSG00000172469	MANEA	MANEA_HUMAN	Q5SRI9	A_23_P255663	0.391979	11.9583	3.63969	0.00223133	0.268486	1
ENSG00000273173	SNURF	SNURF_HUMAN	Q9Y675	A_23_P77066	-0.290808	13.0523	-3.63572	0.00225009	0.268486	1
ENSG00000128739	SNRPN	RSMN_HUMAN	P63162	A_23_P77066	-0.290808	13.0523	-3.63572	0.00225009	0.268486	1
ENSG00000241563	CORT	CORT_HUMAN	O00230	A_24_P246926	0.23832	8.65008	3.63538	0.00225171	0.268486	1
ENSG00000251503	APITD1-CORT	-	-	A_24_P246926	0.23832	8.65008	3.63538	0.00225171	0.268486	1
ENSG00000135547	HEY2	HEY2_HUMAN	Q9UBP5	A_23_P168351	-0.301366	7.31061	-3.63126	0.00227132	0.268486	1
ENSG00000132470	ITGB4	ITB4_HUMAN	P16144	A_23_P66355	-0.334979	8.10941	-3.63083	0.00227335	0.268486	1
ENSG00000178130	-	-	-	A_32_P942508	0.294646	7.0639	3.62822	0.00228589	0.268486	1
ENSG00000149313	AASDHPPT	ADPPT_HUMAN	Q9NRN7	A_23_P202988	0.434747	11.44	3.62771	0.00228834	0.268486	1
ENSG00000242779	-	-	-	A_24_P344516	0.293019	8.19089	3.6256	0.00229853	0.268486	1
ENSG00000167670	CHAF1A	CAF1A_HUMAN	Q13111	A_24_P53519	-0.292614	12.6637	-3.62524	0.00230026	0.268486	1
ENSG00000125871	MGME1	MGME1_HUMAN	Q9BQP7	A_24_P254285	-0.308914	9.6944	-3.62494	0.00230171	0.268486	1
ENSG00000105854	PON2	PON2_HUMAN	Q15165	A_23_P31399	0.317473	11.7875	3.62222	0.00231492	0.268486	1
ENSG00000120833	SOCS2	SOCS2_HUMAN	O14508	A_23_P128215	0.324176	11.6024	3.6217	0.00231746	0.268486	1
ENSG00000132466	ANKRD17	ANR17_HUMAN	O75179	A_23_P144378	-0.292821	12.0626	-3.62106	0.00232058	0.268486	1
ENSG00000155463	OXA1L	OXA1L_HUMAN	Q15070	A_23_P2998	-0.279792	11.6196	-3.62043	0.00232367	0.268486	1
ENSG00000275074	NUDT18	NUD18_HUMAN	Q6ZVK8	A_23_P123454	0.231718	8.75917	3.61996	0.00232597	0.268486	1
ENSG00000173581	CCDC106	CC106_HUMAN	Q9BWC9	A_23_P16197	-0.235611	9.08343	-3.61246	0.002363	0.271997	1
ENSG00000090316	MAEA	MAEA_HUMAN	Q7L5Y9	A_24_P334445	0.309397	12.6424	3.61108	0.00236987	0.272025	1
ENSG00000079739	PGM1	PGM1_HUMAN	P36871	A_23_P52031	0.355582	13.9969	3.60586	0.00239602	0.27355	1
ENSG00000150093	ITGB1	ITB1_HUMAN	P05556	A_23_P104199	-0.309333	10.3457	-3.6054	0.00239834	0.27355	1
ENSG00000186487	MYT1L	MYT1L_HUMAN	Q9UL68	A_23_P398712	0.245811	7.02803	3.60446	0.00240313	0.27355	1
ENSG00000106025	TSPAN12	TSN12_HUMAN	O95859	A_23_P145984	0.270904	9.79426	3.59935	0.00242908	0.275004	1
ENSG00000167614	TTYH1	TTYH1_HUMAN	Q9H313	A_23_P50817	-0.283454	7.8211	-3.599	0.00243088	0.275004	1
ENSG00000275650	TTYH1	TTYH1_HUMAN	Q9H313	A_23_P50817	-0.283454	7.8211	-3.599	0.00243088	0.275004	1
ENSG00000276887	TTYH1	TTYH1_HUMAN	Q9H313	A_23_P50817	-0.283454	7.8211	-3.599	0.00243088	0.275004	1
ENSG00000276537	TTYH1	TTYH1_HUMAN	Q9H313	A_23_P50817	-0.283454	7.8211	-3.599	0.00243088	0.275004	1
ENSG00000276840	-	-	-	A_32_P57728	0.234068	10.8708	3.59801	0.00243597	0.275004	1
ENSG00000174384	-	-	-	A_32_P57728	0.234068	10.8708	3.59801	0.00243597	0.275004	1
ENSG00000273598	-	-	-	A_32_P57728	0.234068	10.8708	3.59801	0.00243597	0.275004	1
ENSG00000278416	-	-	-	A_32_P57728	0.234068	10.8708	3.59801	0.00243597	0.275004	1
ENSG00000273897	-	-	-	A_32_P57728	0.234068	10.8708	3.59801	0.00243597	0.275004	1
ENSG00000277125	-	-	-	A_32_P57728	0.234068	10.8708	3.59801	0.00243597	0.275004	1
ENSG00000078319	-	-	-	A_32_P57728	0.234068	10.8708	3.59801	0.00243597	0.275004	1
ENSG00000229018	-	-	-	A_32_P57728	0.234068	10.8708	3.59801	0.00243597	0.275004	1
ENSG00000144063	MALL	MALL_HUMAN	Q13021	A_24_P80204	-0.239374	8.15445	-3.59522	0.00245033	0.275114	1
ENSG00000006125	AP2B1	AP2B1_HUMAN	P63010	A_24_P253827	-0.268269	10.6232	-3.59083	0.00247303	0.275347	1
ENSG00000198090	KRTAP4-6	KRA46_HUMAN	Q9BYQ5	A_23_P417100	-0.286452	7.01076	-3.58938	0.00248063	0.275347	1
ENSG00000223814	-	-	-	A_23_P336859	0.319306	10.5867	3.58872	0.00248407	0.275347	1
ENSG00000269113	TRABD2B	TIKI2_HUMAN	A6NFA1	A_23_P336859	0.319306	10.5867	3.58872	0.00248407	0.275347	1
ENSG00000167459	-	-	-	A_24_P14403	-0.255364	6.96606	-3.58815	0.00248703	0.275347	1
ENSG00000186306	OR10T2	O10T2_HUMAN	Q8NGX3	A_23_P23507	0.309202	6.85398	3.58432	0.0025072	0.275347	1
ENSG00000204599	TRIM39	TRI39_HUMAN	Q9HCM9	A_24_P89413	0.239584	9.98179	3.58357	0.00251114	0.275347	1
ENSG00000134250	NOTCH2	NOTC2_HUMAN	Q04721	A_24_P50057	0.378257	12.1129	3.58229	0.0025179	0.275347	1
ENSG00000149269	PAK1	PAK1_HUMAN	Q13153	A_23_P75989	-0.294128	10.2094	-3.58088	0.00252539	0.275347	1
ENSG00000182533	CAV3	CAV3_HUMAN	P56539	A_24_P319989	-0.300043	6.81462	-3.57916	0.00253458	0.275347	1
ENSG00000176845	METRNL	METRL_HUMAN	Q641Q3	A_23_P10591	-0.375466	11.331	-3.57463	0.00255882	0.275347	1
ENSG00000140990	NDUFB10	NDUBA_HUMAN	O96000	A_23_P118105	0.238857	15.0346	3.57399	0.00256228	0.275347	1
ENSG00000077782	FGFR1	FGFR1_HUMAN	P11362	A_23_P219105	-0.419455	9.28381	-3.57043	0.00258157	0.275347	1
ENSG00000119688	ABCD4	ABCD4_HUMAN	O14678	A_23_P37327	0.235084	11.3276	3.57015	0.00258308	0.275347	1
ENSG00000173198	CYSLTR1	CLTR1_HUMAN	Q9Y271	A_24_P915225	-0.237255	6.74883	-3.56873	0.00259084	0.275347	1
ENSG00000104529	EEF1D	EF1D_HUMAN	P29692	A_23_P389708	-0.241964	14.6416	-3.56825	0.00259343	0.275347	1
ENSG00000177669	MBOAT4	MBOA4_HUMAN	Q96T53	A_24_P306824	0.291522	6.97165	3.56708	0.00259982	0.275347	1
ENSG00000134202	GSTM3	GSTM3_HUMAN	P21266	A_24_P914434	0.215618	7.8576	3.56447	0.00261415	0.275965	1
ENSG00000076984	MAP2K7	MP2K7_HUMAN	O14733	A_24_P313895	-0.302236	7.17909	-3.55851	0.00264717	0.276677	1
ENSG00000148730	-	-	-	A_23_P115922	-0.256697	13.8874	-3.54931	0.00269895	0.277074	1
ENSG00000116157	GPX7	GPX7_HUMAN	Q96SL4	A_23_P73972	0.318987	10.9081	3.54897	0.00270087	0.277074	1
ENSG00000145020	AMT	GCST_HUMAN	P48728	A_24_P174503	-0.296241	9.57314	-3.54873	0.00270221	0.277074	1
ENSG00000163531	NFASC	NFASC_HUMAN	O94856	A_24_P350656	0.236994	10.6873	3.54715	0.00271126	0.277074	1
ENSG00000109099	PMP22	PMP22_HUMAN	Q01453	A_23_P100711	0.24317	9.95568	3.54667	0.00271397	0.277074	1
ENSG00000183908	LRRC55	LRC55_HUMAN	Q6ZSA7	A_24_P819890	-0.343633	6.91971	-3.54563	0.00271994	0.277074	1
ENSG00000219608	-	-	-	A_23_P120644	0.286371	13.3147	3.54489	0.00272416	0.277074	1
ENSG00000111052	LIN7A	LIN7A_HUMAN	O14910	A_23_P99253	0.225314	8.92569	3.54475	0.00272498	0.277074	1
ENSG00000172346	CSDC2	CSDC2_HUMAN	Q9Y534	A_24_P177279	-0.286444	7.45557	-3.54402	0.00272916	0.277074	1
ENSG00000236581	-	-	-	A_32_P54346	-0.257198	7.07514	-3.54374	0.00273076	0.277074	1
ENSG00000144597	EAF1	EAF1_HUMAN	Q96JC9	A_24_P174461	-0.32811	7.05047	-3.54132	0.00274471	0.277804	1
ENSG00000188525	-	-	-	A_24_P932646	0.300604	6.86686	3.53878	0.00275945	0.278435	1
ENSG00000013810	ERIC-1s	TACC3_HUMAN	Q9Y6A5	A_23_P212844	-0.329615	10.6272	-3.53627	0.00277406	0.278435	1
ENSG00000013810	TACC3	TACC3_HUMAN	Q9Y6A5	A_23_P212844	-0.329615	10.6272	-3.53627	0.00277406	0.278435	1
ENSG00000250486	FAM218A	F218A_HUMAN	Q96MZ4	A_32_P193583	0.252798	7.2127	3.53189	0.00279972	0.279924	1
ENSG00000101639	CEP192	CE192_HUMAN	Q8TEP8	A_23_P89710	0.320895	10.6382	3.5295	0.00281384	0.280371	1
ENSG00000115295	CLIP4	CLIP4_HUMAN	Q8N3C7	A_23_P417363	0.266749	7.48685	3.52883	0.00281783	0.280371	1
ENSG00000186635	ARAP1	ARAP1_HUMAN	Q96P48	A_24_P398432	-0.388214	9.80989	-3.52328	0.00285093	0.280663	1
ENSG00000136425	CIB2	CIB2_HUMAN	O75838	A_23_P65890	-0.345953	11.5398	-3.52317	0.00285161	0.280663	1
ENSG00000148516	ZEB1	ZEB1_HUMAN	P37275	A_23_P202013	-0.249718	7.10575	-3.5218	0.00285981	0.280663	1
ENSG00000020129	NCDN	NCDN_HUMAN	Q9UBB6	A_23_P97736	-0.240162	9.49584	-3.52135	0.00286254	0.280663	1
ENSG00000148834	GSTO1	GSTO1_HUMAN	P78417	A_23_P1254	0.251892	14.5308	3.52035	0.00286858	0.280663	1
ENSG00000197217	ENTPD4	ENTP4_HUMAN	Q9Y227	A_24_P269598	0.285964	10.2948	3.51851	0.00287968	0.280948	1
ENSG00000103021	CCDC113	CC113_HUMAN	Q9H0I3	A_24_P73730	0.244089	7.88395	3.51761	0.00288517	0.280948	1
ENSG00000183199	-	-	-	A_24_P161525	-0.395471	12.569	-3.51412	0.00290643	0.281528	1
ENSG00000231245	-	-	-	A_23_P67992	0.25255	10.5644	3.51289	0.002914	0.281528	1
ENSG00000197223	C1D	C1D_HUMAN	Q13901	A_23_P67992	0.25255	10.5644	3.51289	0.002914	0.281528	1
ENSG00000254706	-	-	-	A_24_P925737	-0.231557	7.03293	-3.51048	0.00292882	0.281528	1
ENSG00000239887	C1orf226	CA226_HUMAN	A1L170	A_24_P925737	-0.231557	7.03293	-3.51048	0.00292882	0.281528	1
ENSG00000126822	PLEKHG3	PKHG3_HUMAN	A1L390	A_32_P311737	-0.224456	7.72799	-3.50877	0.00293933	0.281528	1
ENSG00000158748	HTR6	5HT6R_HUMAN	P50406	A_23_P74766	0.287422	7.00267	3.50812	0.00294339	0.281528	1
ENSG00000120471	TP53AIP1	TPIP1_HUMAN	Q9HCN2	A_23_P340171	-0.354407	7.00809	-3.50771	0.00294592	0.281528	1
ENSG00000159527	PGLYRP3	PGRP3_HUMAN	Q96LB9	A_23_P96899	0.23691	7.08286	3.50459	0.00296533	0.281895	1
ENSG00000126803	HSPA2	HSP72_HUMAN	P54652	A_23_P88303	-0.602659	10.3178	-3.50279	0.00297655	0.281895	1
ENSG00000180613	GSX2	GSX2_HUMAN	Q9BZM3	A_23_P92453	-0.27916	6.93936	-3.50235	0.00297931	0.281895	1
ENSG00000099834	CDHR5	-	-	A_23_P202683	0.298509	6.99577	3.50195	0.00298186	0.281895	1
ENSG00000110955	ATP5B	ATPB_HUMAN	P06576	A_23_P33216	-0.292627	14.7384	-3.5016	0.00298407	0.281895	1
ENSG00000251442	-	-	-	A_24_P546043	-0.31576	7.06935	-3.50016	0.00299312	0.282102	1
ENSG00000186111	PIP5K1C	PI51C_HUMAN	O60331	A_23_P330262	-0.272858	8.90817	-3.4978	0.00300802	0.282539	1
ENSG00000133114	GPALPP1	GPAM1_HUMAN	Q8IXQ4	A_23_P2732	0.234346	8.94088	3.49725	0.00301152	0.282539	1
ENSG00000164323	CFAP97	CFA97_HUMAN	Q9P2B7	A_32_P30153	0.243257	7.32482	3.49356	0.00303497	0.283155	1
ENSG00000078295	ADCY2	ADCY2_HUMAN	Q08462	A_32_P405973	-0.308432	6.94821	-3.49202	0.00304485	0.283155	1
ENSG00000134294	SLC38A2	S38A2_HUMAN	Q96QD8	A_23_P218079	-0.364236	11.7975	-3.49189	0.00304564	0.283155	1
ENSG00000109654	TRIM2	TRIM2_HUMAN	Q9C040	A_24_P208909	0.311679	10.5643	3.488	0.00307071	0.2842	1
ENSG00000196284	SUPT3H	SUPT3_HUMAN	O75486	A_32_P31666	0.242269	8.52033	3.48549	0.00308698	0.284902	1
ENSG00000173598	NUDT4	NUDT4_HUMAN	Q9NZJ9	A_24_P67946	0.321422	10.5401	3.48469	0.00309216	0.284902	1
ENSG00000038427	VCAN	CSPG2_HUMAN	P13611	A_23_P144959	-0.39337	10.4303	-3.48133	0.00311412	0.28515	1
ENSG00000105281	SLC1A5	AAAT_HUMAN	Q15758	A_23_P55998	-0.36004	10.3123	-3.48123	0.00311476	0.28515	1
ENSG00000126602	TRAP1	TRAP1_HUMAN	Q12931	A_23_P3849	-0.27851	10.8762	-3.47904	0.00312911	0.28515	1
ENSG00000136783	NIPSNAP3A	NPS3A_HUMAN	Q9UFN0	A_23_P20606	0.279569	9.60184	3.47779	0.0031374	0.28515	1
ENSG00000228594	C1orf233	CA233_HUMAN	F2Z333	A_24_P731549	-0.239257	10.3712	-3.47774	0.0031377	0.28515	1
ENSG00000083838	DKFZp434K202	ZN446_HUMAN	Q9NWS9	A_23_P101272	0.358528	11.3664	3.47643	0.0031464	0.28515	1
ENSG00000083838	ZNF446	ZN446_HUMAN	Q9NWS9	A_23_P101272	0.358528	11.3664	3.47643	0.0031464	0.28515	1
ENSG00000249479	-	-	-	A_24_P510896	-0.24598	7.08254	-3.47096	0.00318277	0.28515	1
ENSG00000180209	MYLPF	MLRS_HUMAN	Q96A32	A_23_P60742	0.431773	11.2532	3.47051	0.00318584	0.28515	1
ENSG00000164935	DCSTAMP	DCSTP_HUMAN	Q9H295	A_23_P43107	0.236618	7.06638	3.47023	0.00318766	0.28515	1
ENSG00000137936	BCAR3	BCAR3_HUMAN	O75815	A_23_P97394	0.346206	11.5829	3.46997	0.00318942	0.28515	1
ENSG00000248596	-	-	-	A_32_P153589	0.306617	8.69949	3.46974	0.00319098	0.28515	1
ENSG00000149201	CCDC81	CCD81_HUMAN	Q6ZN84	A_23_P128008	0.225489	7.65517	3.46582	0.0032174	0.28515	1
ENSG00000161040	FBXL13	FXL13_HUMAN	Q8NEE6	A_23_P379071	0.275848	7.56273	3.46512	0.00322219	0.28515	1
ENSG00000138944	KIAA1644	K1644_HUMAN	Q3SXP7	A_24_P57993	-0.410139	7.00164	-3.46481	0.00322426	0.28515	1
ENSG00000196581	AJAP1	AJAP1_HUMAN	Q9UKB5	A_23_P23155	0.288814	11.2321	3.46331	0.00323443	0.28515	1
ENSG00000178974	FBXO34	FBX34_HUMAN	Q9NWN3	A_23_P117527	0.285691	11.3832	3.46224	0.00324177	0.28515	1
ENSG00000164318	EGFLAM	EGFLA_HUMAN	Q63HQ2	A_23_P144911	0.303396	9.40555	3.4613	0.00324813	0.28515	1
ENSG00000183421	RIPK4	RIPK4_HUMAN	P57078	A_24_P125871	0.355188	11.1872	3.46006	0.00325667	0.28515	1
ENSG00000159516	SPRR2G	SPR2G_HUMAN	Q9BYE4	A_23_P114597	0.304186	7.16186	3.45763	0.00327335	0.28515	1
ENSG00000008277	ADAM22	ADA22_HUMAN	Q9P0K1	A_32_P180395	-0.222786	7.15092	-3.457	0.00327767	0.28515	1
ENSG00000198336	MYL4	MYL4_HUMAN	P12829	A_24_P188218	0.523131	13.4307	3.45524	0.00328987	0.28515	1
ENSG00000279688	-	-	-	A_23_P158041	0.240811	7.01319	3.45374	0.00330022	0.28515	1
ENSG00000181997	-	-	-	A_23_P158041	0.240811	7.01319	3.45374	0.00330022	0.28515	1
ENSG00000186466	-	-	-	A_23_P158041	0.240811	7.01319	3.45374	0.00330022	0.28515	1
ENSG00000165269	AQP7	AQP7_HUMAN	O14520	A_23_P158041	0.240811	7.01319	3.45374	0.00330022	0.28515	1
ENSG00000259916	LOC101930168	-	-	A_23_P158041	0.240811	7.01319	3.45374	0.00330022	0.28515	1
ENSG00000116586	LAMTOR2	LTOR2_HUMAN	Q9Y2Q5	A_24_P182433	0.226742	12.5289	3.45307	0.00330487	0.28515	1
ENSG00000145423	SFRP2	SFRP2_HUMAN	Q96HF1	A_24_P934546	-0.543825	11.0318	-3.45296	0.00330566	0.28515	1
ENSG00000277156	-	-	-	A_24_P178093	-0.27227	10.4487	-3.45172	0.00331429	0.28515	1
ENSG00000278594	-	-	-	A_24_P178093	-0.27227	10.4487	-3.45172	0.00331429	0.28515	1
ENSG00000215270	-	-	-	A_24_P178093	-0.27227	10.4487	-3.45172	0.00331429	0.28515	1
ENSG00000099139	PCSK5	PCSK5_HUMAN	Q92824	A_23_P257003	-0.548578	10.3426	-3.44876	0.00333504	0.28515	1
ENSG00000153012	LGI2	LGI2_HUMAN	Q8N0V4	A_23_P7194	0.34358	10.7529	3.44802	0.0033402	0.28515	1
ENSG00000161180	CCDC116	CC116_HUMAN	Q8IYX3	A_23_P342108	-0.295368	7.19321	-3.44802	0.00334022	0.28515	1
ENSG00000129451	KLK10	KLK10_HUMAN	O43240	A_24_P399490	-0.247566	7.1904	-3.44622	0.0033529	0.28515	1
ENSG00000110092	CCND1	CCND1_HUMAN	P24385	A_23_P202837	-0.2947	8.97209	-3.4429	0.00337639	0.28515	1
ENSG00000225265	-	-	-	A_32_P18448	0.252963	7.80893	3.44237	0.00338015	0.28515	1
ENSG00000180758	GPR157	GP157_HUMAN	Q5UAW9	A_24_P757255	-0.220193	7.29155	-3.44065	0.00339237	0.28515	1
ENSG00000055957	ITIH1	ITIH1_HUMAN	P19827	A_23_P18223	0.288685	7.12408	3.44049	0.00339354	0.28515	1
ENSG00000251637	-	-	-	A_32_P69333	0.343455	8.92682	3.43944	0.00340106	0.28515	1
ENSG00000115085	ZAP70	ZAP70_HUMAN	P43403	A_23_P39682	0.314455	8.93776	3.43703	0.00341836	0.28515	1
ENSG00000172575	RASGRP1	GRP1_HUMAN	O95267	A_23_P124642	0.342549	8.72617	3.43649	0.00342223	0.28515	1
ENSG00000108175	ZMIZ1	ZMIZ1_HUMAN	Q9ULJ6	A_23_P138435	0.242808	11.1809	3.43546	0.00342964	0.28515	1
ENSG00000100393	EP300	EP300_HUMAN	Q09472	A_23_P40693	-0.284654	9.55215	-3.43411	0.00343941	0.28515	1
ENSG00000227869	-	-	-	A_32_P61679	0.304347	8.9654	3.433	0.00344741	0.28515	1
ENSG00000055070	SZRD1	SZRD1_HUMAN	Q7Z422	A_24_P396489	-0.317446	8.31107	-3.43271	0.00344951	0.28515	1
ENSG00000186842	-	-	-	A_24_P202905	0.252209	7.04465	3.43228	0.0034527	0.28515	1
ENSG00000213763	-	-	-	A_32_P113533	-0.276963	15.0158	-3.43222	0.00345311	0.28515	1
ENSG00000152061	RABGAP1L	RBG10_HUMAN	B7ZAP0	A_24_P333525	-0.319123	9.38871	-3.43038	0.00346651	0.28515	1
ENSG00000152061	RABGAP1L	RBG1L_HUMAN	Q5R372	A_24_P333525	-0.319123	9.38871	-3.43038	0.00346651	0.28515	1
ENSG00000269095	-	-	-	A_23_P108326	-0.351221	11.2393	-3.43035	0.00346675	0.28515	1
ENSG00000160113	NR2F6	NR2F6_HUMAN	P10588	A_23_P108326	-0.351221	11.2393	-3.43035	0.00346675	0.28515	1
ENSG00000198680	TUSC1	TUSC1_HUMAN	Q2TAM9	A_23_P373819	0.236199	9.53527	3.43011	0.00346844	0.28515	1
ENSG00000112419	PHACTR2	PHAR2_HUMAN	O75167	A_24_P726336	0.270683	10.8267	3.42996	0.00346957	0.28515	1
ENSG00000118705	RPN2	RPN2_HUMAN	P04844	A_23_P108994	-0.277794	12.4121	-3.42583	0.00349986	0.287065	1
ENSG00000163377	FAM19A4	F19A4_HUMAN	Q96LR4	A_32_P71571	-0.244463	7.25688	-3.42479	0.00350751	0.28712	1
ENSG00000134324	LPIN1	LPIN1_HUMAN	Q14693	A_32_P52609	0.279698	10.2636	3.42228	0.00352609	0.287287	1
ENSG00000090686	USP48	UBP48_HUMAN	Q86UV5	A_24_P393285	-0.302761	9.12216	-3.42209	0.00352748	0.287287	1
ENSG00000085840	ORC1	ORC1_HUMAN	Q13415	A_23_P45799	-0.258184	9.01251	-3.42091	0.00353624	0.287287	1
ENSG00000162736	NCSTN	NICA_HUMAN	Q92542	A_23_P34402	0.224407	13.688	3.42032	0.00354062	0.287287	1
ENSG00000267152	-	-	-	A_32_P175042	0.251143	7.21951	3.41894	0.00355096	0.287287	1
ENSG00000116670	MAD2L2	MD2L2_HUMAN	Q9UI95	A_23_P23206	-0.274357	12.0664	-3.41886	0.0035515	0.287287	1
ENSG00000138378	STAT4	STAT4_HUMAN	Q14765	A_23_P68031	0.275958	9.40842	3.41269	0.00359787	0.289521	1
ENSG00000206560	ANKRD28	ANR28_HUMAN	O15084	A_23_P109794	-0.288684	7.41214	-3.41232	0.00360071	0.289521	1
ENSG00000162924	REL	REL_HUMAN	Q04864	A_23_P56938	0.228562	8.59004	3.41145	0.0036073	0.289521	1
ENSG00000259592	-	-	-	A_24_P58477	-0.231333	13.6036	-3.41052	0.00361435	0.289521	1
ENSG00000178878	APOLD1	APLD1_HUMAN	Q96LR9	A_23_P48217	0.383759	8.84973	3.4092	0.0036244	0.289549	1
ENSG00000138640	FAM13A	FA13A_HUMAN	O94988	A_32_P86644	-0.290987	7.14116	-3.40781	0.00363503	0.289549	1
ENSG00000159023	EPB41	41_HUMAN	P11171	A_23_P351	-0.272749	7.24625	-3.40657	0.00364456	0.289549	1
ENSG00000091136	LAMB1	LAMB1_HUMAN	P07942	A_23_P94030	0.220874	13.3947	3.40337	0.0036691	0.289549	1
ENSG00000170631	ZNF16	ZNF16_HUMAN	P17020	A_23_P168864	-0.26234	8.23383	-3.40254	0.00367555	0.289549	1
ENSG00000064666	CNN2	CNN2_HUMAN	Q99439	A_24_P142743	-0.303756	14.184	-3.40251	0.00367579	0.289549	1
ENSG00000134595	SOX3	SOX3_HUMAN	P41225	A_23_P85218	-0.66362	10.0274	-3.40221	0.00367806	0.289549	1
ENSG00000136110	LECT1	LECT1_HUMAN	O75829	A_23_P25587	-0.37065	9.02834	-3.40128	0.00368526	0.289549	1
ENSG00000106304	SPAM1	HYALP_HUMAN	P38567	A_23_P111826	0.282499	7.45933	3.39933	0.00370043	0.289549	1
ENSG00000038295	TLL1	TLL1_HUMAN	O43897	A_24_P145163	-0.326705	6.96874	-3.39846	0.00370725	0.289549	1
ENSG00000145721	LIX1	LIX1_HUMAN	Q8N485	A_32_P116606	0.264298	7.03468	3.39732	0.00371614	0.289549	1
ENSG00000112249	ASCC3	ASCC3_HUMAN	Q8N3C0	A_23_P30972	-0.397087	10.1636	-3.39728	0.00371639	0.289549	1
ENSG00000116586	LAMTOR2	LTOR2_HUMAN	Q9Y2Q5	A_23_P103698	0.238053	12.8879	3.39641	0.00372319	0.289549	1
ENSG00000108312	UBTF	UBF1_HUMAN	P17480	A_23_P100779	-0.228578	8.83449	-3.39639	0.00372341	0.289549	1
ENSG00000111405	ENDOU	ENDOU_HUMAN	P21128	A_24_P347310	0.249159	6.89457	3.39587	0.00372744	0.289549	1
ENSG00000101266	CSNK2A1	CSK21_HUMAN	P68400	A_23_P502575	-0.217623	11.2581	-3.39425	0.00374015	0.289989	1
ENSG00000140396	NCOA2	NCOA2_HUMAN	Q15596	A_24_P166794	0.22692	9.77341	3.39262	0.00375298	0.290082	1
ENSG00000104970	KIR3DX1	KI3X1_HUMAN	Q9H7L2	A_23_P398943	0.268007	7.01155	3.39103	0.00376562	0.290082	1
ENSG00000198682	PAPSS2	PAPS2_HUMAN	O95340	A_24_P940166	0.262342	10.6643	3.38969	0.00377619	0.290082	1
ENSG00000263639	MSMB	MSMB_HUMAN	P08118	A_23_P75024	0.236901	9.40013	3.38963	0.00377665	0.290082	1
ENSG00000022267	FHL1	FHL1_HUMAN	Q13642	A_23_P217326	-0.229871	8.42095	-3.38743	0.00379419	0.290886	1
ENSG00000178828	RNF186	RN186_HUMAN	Q9NXI6	A_23_P126248	-0.334077	6.97281	-3.38354	0.00382537	0.291865	1
ENSG00000172318	B3GALT1	B3GT1_HUMAN	Q9Y5Z6	A_32_P154361	-0.410642	9.46621	-3.3829	0.0038305	0.291865	1
ENSG00000075340	ADD2	ADDB_HUMAN	P35612	A_23_P209856	-0.31381	8.14134	-3.38137	0.00384286	0.291865	1
ENSG00000254788	CKLF	-	-	A_23_P118061	0.30273	10.3023	3.37955	0.0038576	0.291865	1
ENSG00000254788	CKLF-CMTM1	-	-	A_23_P118061	0.30273	10.3023	3.37955	0.0038576	0.291865	1
ENSG00000217555	CKLF	-	-	A_23_P118061	0.30273	10.3023	3.37955	0.0038576	0.291865	1
ENSG00000147596	PRDM14	PRD14_HUMAN	Q9GZV8	A_23_P123488	-0.507163	8.05835	-3.37816	0.00386888	0.291865	1
ENSG00000182793	GSTA5	GSTA5_HUMAN	Q7RTV2	A_23_P93141	0.259924	8.1814	3.37715	0.00387711	0.291865	1
ENSG00000159658	EFCAB14	EFC14_HUMAN	O75071	A_24_P233917	0.299812	10.8134	3.37511	0.00389378	0.291865	1
ENSG00000134046	MBD2	MBD2_HUMAN	Q9UBB5	A_24_P119201	0.215146	12.4848	3.374	0.00390285	0.291865	1
ENSG00000136488	CSH1	CSH1_HUMAN	P0DML2	A_23_P207170	-0.534432	9.15182	-3.37182	0.00392081	0.291865	1
ENSG00000148123	LPPR1	-	-	A_23_P259707	0.278571	7.10826	3.37173	0.00392156	0.291865	1
ENSG00000077782	FGFR1	FGFR1_HUMAN	P11362	A_23_P372923	-0.342651	8.8201	-3.37074	0.00392968	0.291865	1
ENSG00000136802	LRRC8A	LRC8A_HUMAN	Q8IWT6	A_24_P376287	-0.270183	9.04257	-3.36945	0.00394036	0.291865	1
ENSG00000248712	CCDC153	CC153_HUMAN	Q494R4	A_24_P450285	0.255519	9.68966	3.36916	0.00394281	0.291865	1
ENSG00000138685	FGF2	FGF2_HUMAN	P09038	A_23_P218918	-0.564204	9.95685	-3.36641	0.00396565	0.291865	1
ENSG00000244476	ERVFRD-1	SYCY2_HUMAN	P60508	A_24_P924261	0.216609	6.94645	3.36635	0.00396609	0.291865	1
ENSG00000146457	WTAP	FL2D_HUMAN	Q15007	A_23_P215037	0.236973	11.4261	3.3659	0.00396986	0.291865	1
ENSG00000232702	-	-	-	A_23_P215037	0.236973	11.4261	3.3659	0.00396986	0.291865	1
ENSG00000181222	POLR2A	RPB1_HUMAN	P24928	A_24_P99679	-0.226116	7.90901	-3.36541	0.00397394	0.291865	1
ENSG00000221290	-	-	-	A_24_P418408	0.320286	12.5536	3.36539	0.00397415	0.291865	1
ENSG00000182118	FAM89A	FA89A_HUMAN	Q96GI7	A_24_P418408	0.320286	12.5536	3.36539	0.00397415	0.291865	1
ENSG00000132361	CLUH	CLU_HUMAN	O75153	A_24_P61753	-0.241483	9.55221	-3.36472	0.0039797	0.291865	1
ENSG00000103888	CEMIP	CEMIP_HUMAN	Q8WUJ3	A_23_P324754	-0.230087	7.26903	-3.36397	0.00398603	0.291865	1
ENSG00000154645	CHODL	CHODL_HUMAN	Q9H9P2	A_23_P68669	0.265985	9.98998	3.36389	0.00398668	0.291865	1
ENSG00000230849	-	-	-	A_24_P692198	-0.233869	8.97707	-3.36199	0.00400267	0.291865	1
ENSG00000137857	DUOX1	DUOX1_HUMAN	Q9NRD9	A_24_P316586	0.327164	7.04079	3.36177	0.00400449	0.291865	1
ENSG00000149150	SLC43A1	LAT3_HUMAN	O75387	A_23_P52939	-0.346966	9.14634	-3.36115	0.00400974	0.291865	1
ENSG00000060982	BCAT1	BCAT1_HUMAN	P54687	A_23_P87528	-0.263326	8.43838	-3.35819	0.00403476	0.292261	1
ENSG00000128585	MKLN1	MKLN1_HUMAN	Q9UL63	A_23_P93613	0.298751	10.2779	3.35705	0.00404442	0.292261	1
ENSG00000274570	-	-	-	A_23_P425967	-0.342953	6.95082	-3.35677	0.00404683	0.292261	1
ENSG00000136206	SPDYE1	SPDE1_HUMAN	Q8NFV5	A_23_P425967	-0.342953	6.95082	-3.35677	0.00404683	0.292261	1
ENSG00000170092	SPDYE5	-	-	A_23_P425967	-0.342953	6.95082	-3.35677	0.00404683	0.292261	1
ENSG00000275976	-	-	-	A_23_P425967	-0.342953	6.95082	-3.35677	0.00404683	0.292261	1
ENSG00000179994	-	-	-	A_23_P425967	-0.342953	6.95082	-3.35677	0.00404683	0.292261	1
ENSG00000262461	-	-	-	A_23_P425967	-0.342953	6.95082	-3.35677	0.00404683	0.292261	1
ENSG00000273520	-	-	-	A_23_P425967	-0.342953	6.95082	-3.35677	0.00404683	0.292261	1
ENSG00000071537	SEL1L	SE1L1_HUMAN	Q9UBV2	A_24_P219114	0.239273	7.25876	3.35367	0.00407327	0.292587	1
ENSG00000154537	FAM27A	FAM27_HUMAN	Q5VT28	A_24_P342096	0.278391	8.61095	3.35315	0.00407771	0.292587	1
ENSG00000154537	FAM27B	FAM27_HUMAN	Q5VT28	A_24_P342096	0.278391	8.61095	3.35315	0.00407771	0.292587	1
ENSG00000154537	FAM27C	FAM27_HUMAN	Q5VT28	A_24_P342096	0.278391	8.61095	3.35315	0.00407771	0.292587	1
ENSG00000278763	-	-	-	A_24_P342096	0.278391	8.61095	3.35315	0.00407771	0.292587	1
ENSG00000256022	-	-	-	A_32_P114726	-0.288761	6.93826	-3.35236	0.0040845	0.292587	1
ENSG00000171596	NMUR1	NMUR1_HUMAN	Q9HB89	A_23_P209700	-0.257008	7.09456	-3.35125	0.00409399	0.292587	1
ENSG00000266405	-	-	-	A_32_P94221	0.271941	6.95771	3.35069	0.00409886	0.292587	1
ENSG00000160049	DFFA	DFFA_HUMAN	O00273	A_23_P12189	-0.223732	11.1031	-3.35045	0.00410093	0.292587	1
ENSG00000132819	RBM38	RBM38_HUMAN	Q9H0Z9	A_23_P17430	-0.301096	9.4182	-3.34745	0.00412688	0.292587	1
ENSG00000204414	CSHL1	CSHL_HUMAN	Q14406	A_23_P344408	-0.314525	7.7954	-3.3474	0.00412729	0.292587	1
ENSG00000156232	WHAMM	WHAMM_HUMAN	Q8TF30	A_24_P307827	0.210249	8.81889	3.34623	0.00413744	0.292587	1
ENSG00000255152	MSH5-SAPCD1	-	-	A_24_P3804	0.427132	9.11114	3.34523	0.00414618	0.292587	1
ENSG00000228727	SAPCD1	SAPC1_HUMAN	Q5SSQ6	A_24_P3804	0.427132	9.11114	3.34523	0.00414618	0.292587	1
ENSG00000105323	HNRNPUL1	HNRL1_HUMAN	Q9BUJ2	A_23_P502612	-0.254621	12.2111	-3.34391	0.00415765	0.292587	1
ENSG00000176444	CLK2	CLK2_HUMAN	P49760	A_32_P79610	-0.248271	9.82589	-3.34088	0.00418425	0.292587	1
ENSG00000232553	-	-	-	A_32_P79610	-0.248271	9.82589	-3.34088	0.00418425	0.292587	1
ENSG00000261893	CLK2	CLK2_HUMAN	P49760	A_32_P79610	-0.248271	9.82589	-3.34088	0.00418425	0.292587	1
ENSG00000258655	-	-	-	A_23_P25746	0.35193	9.67484	3.34031	0.00418925	0.292587	1
ENSG00000152061	RABGAP1L	RBG10_HUMAN	B7ZAP0	A_24_P28295	-0.352377	9.18955	-3.33999	0.00419202	0.292587	1
ENSG00000152061	RABGAP1L	RBG1L_HUMAN	Q5R372	A_24_P28295	-0.352377	9.18955	-3.33999	0.00419202	0.292587	1
ENSG00000176542	KIAA2018	K2018_HUMAN	Q68DE3	A_24_P110887	-0.227642	7.43012	-3.33797	0.00420988	0.292587	1
ENSG00000153975	ZUFSP	ZUFSP_HUMAN	Q96AP4	A_32_P109522	0.304438	10.1018	3.33257	0.0042579	0.292587	1
ENSG00000176170	SPHK1	SPHK1_HUMAN	Q9NYA1	A_23_P38106	0.20376	7.81774	3.33257	0.00425794	0.292587	1
ENSG00000137309	HMGA1	HMGA1_HUMAN	P17096	A_23_P42331	-0.224636	15.2086	-3.33229	0.00426046	0.292587	1
ENSG00000233440	-	-	-	A_23_P42331	-0.224636	15.2086	-3.33229	0.00426046	0.292587	1
ENSG00000176826	-	-	-	A_23_P334709	0.294061	12.5694	3.33186	0.00426426	0.292587	1
ENSG00000122642	FKBP9	FKBP9_HUMAN	O95302	A_23_P334709	0.294061	12.5694	3.33186	0.00426426	0.292587	1
ENSG00000167992	VWCE	VWCE_HUMAN	Q96DN2	A_23_P52986	-0.415801	12.3638	-3.33169	0.00426577	0.292587	1
ENSG00000173482	PTPRM	PTPRM_HUMAN	P28827	A_23_P159255	0.243752	10.4443	3.33167	0.00426595	0.292587	1
ENSG00000136504	KAT7	KAT7_HUMAN	O95251	A_23_P152818	-0.26654	9.6686	-3.33023	0.00427889	0.292587	1
ENSG00000223414	-	-	-	A_32_P8546	-0.2665	6.95504	-3.3288	0.00429176	0.292587	1
ENSG00000221887	HMSD	HMSDV_HUMAN	P0C7T4	A_24_P147461	0.221665	7.06291	3.32775	0.00430124	0.292587	1
ENSG00000221887	HMSD	HMSD_HUMAN	A8MTL9	A_24_P147461	0.221665	7.06291	3.32775	0.00430124	0.292587	1
ENSG00000166401	SERPINB8	SPB8_HUMAN	P50452	A_24_P147461	0.221665	7.06291	3.32775	0.00430124	0.292587	1
ENSG00000263639	MSMB	MSMB_HUMAN	P08118	A_24_P146683	0.311499	9.41838	3.32689	0.00430904	0.292587	1
ENSG00000279867	-	-	-	A_32_P401091	-0.261495	6.95937	-3.32669	0.0043108	0.292587	1
ENSG00000279787	CDY1	CDY1_HUMAN	Q9Y6F8	A_32_P401091	-0.261495	6.95937	-3.32669	0.0043108	0.292587	1
ENSG00000279787	CDY1B	CDY1_HUMAN	Q9Y6F8	A_32_P401091	-0.261495	6.95937	-3.32669	0.0043108	0.292587	1
ENSG00000172352	CDY1	CDY1_HUMAN	Q9Y6F8	A_32_P401091	-0.261495	6.95937	-3.32669	0.0043108	0.292587	1
ENSG00000172352	CDY1B	CDY1_HUMAN	Q9Y6F8	A_32_P401091	-0.261495	6.95937	-3.32669	0.0043108	0.292587	1
ENSG00000172288	CDY1	CDY1_HUMAN	Q9Y6F8	A_32_P401091	-0.261495	6.95937	-3.32669	0.0043108	0.292587	1
ENSG00000172288	CDY1B	CDY1_HUMAN	Q9Y6F8	A_32_P401091	-0.261495	6.95937	-3.32669	0.0043108	0.292587	1
ENSG00000279820	CDY2A	CDY2_HUMAN	Q9Y6F7	A_32_P401091	-0.261495	6.95937	-3.32669	0.0043108	0.292587	1
ENSG00000279820	CDY2B	CDY2_HUMAN	Q9Y6F7	A_32_P401091	-0.261495	6.95937	-3.32669	0.0043108	0.292587	1
ENSG00000279736	-	-	-	A_32_P401091	-0.261495	6.95937	-3.32669	0.0043108	0.292587	1
ENSG00000279150	CDY1	CDY1_HUMAN	Q9Y6F8	A_32_P401091	-0.261495	6.95937	-3.32669	0.0043108	0.292587	1
ENSG00000279150	CDY1B	CDY1_HUMAN	Q9Y6F8	A_32_P401091	-0.261495	6.95937	-3.32669	0.0043108	0.292587	1
ENSG00000280290	CDY2A	CDY2_HUMAN	Q9Y6F7	A_32_P401091	-0.261495	6.95937	-3.32669	0.0043108	0.292587	1
ENSG00000280290	CDY2B	CDY2_HUMAN	Q9Y6F7	A_32_P401091	-0.261495	6.95937	-3.32669	0.0043108	0.292587	1
ENSG00000129873	CDY2A	CDY2_HUMAN	Q9Y6F7	A_32_P401091	-0.261495	6.95937	-3.32669	0.0043108	0.292587	1
ENSG00000129873	CDY2B	CDY2_HUMAN	Q9Y6F7	A_32_P401091	-0.261495	6.95937	-3.32669	0.0043108	0.292587	1
ENSG00000182415	CDY2A	CDY2_HUMAN	Q9Y6F7	A_32_P401091	-0.261495	6.95937	-3.32669	0.0043108	0.292587	1
ENSG00000182415	CDY2B	CDY2_HUMAN	Q9Y6F7	A_32_P401091	-0.261495	6.95937	-3.32669	0.0043108	0.292587	1
ENSG00000164045	CDC25A	MPIP1_HUMAN	P30304	A_23_P121423	-0.222672	9.20555	-3.32659	0.00431171	0.292587	1
ENSG00000168411	RFWD3	RFWD3_HUMAN	Q6PCD5	A_24_P287826	-0.231233	10.3112	-3.32659	0.00431176	0.292587	1
ENSG00000177725	-	-	-	A_24_P273900	0.230177	6.85739	3.32582	0.00431875	0.292587	1
ENSG00000140263	SORD	DHSO_HUMAN	Q00796	A_23_P77103	-0.363105	10.2046	-3.32564	0.00432036	0.292587	1
ENSG00000259479	-	-	-	A_23_P77103	-0.363105	10.2046	-3.32564	0.00432036	0.292587	1
ENSG00000185338	SOCS1	SOCS1_HUMAN	O15524	A_24_P48014	-0.226752	7.52593	-3.32562	0.00432053	0.292587	1
ENSG00000204592	HLA-E	-	-	A_24_P326082	-0.26764	11.7704	-3.32559	0.00432078	0.292587	1
ENSG00000060140	STYK1	STYK1_HUMAN	Q6J9G0	A_23_P13822	-0.265461	7.6434	-3.32547	0.0043219	0.292587	1
ENSG00000138356	AOX1	AOXA_HUMAN	Q06278	A_23_P154037	0.334641	9.22473	3.32354	0.00433943	0.293289	1
ENSG00000054523	KIF1B	KIF1B_HUMAN	O60333	A_23_P201287	0.213307	11.7392	3.3214	0.00435903	0.293344	1
ENSG00000054523	KIF1Bbeta	KIF1B_HUMAN	O60333	A_23_P201287	0.213307	11.7392	3.3214	0.00435903	0.293344	1
ENSG00000115363	EVA1A	EVA1A_HUMAN	Q9H8M9	A_23_P108673	-0.250618	7.20205	-3.32079	0.0043646	0.293344	1
ENSG00000145284	SCD5	SCD5_HUMAN	Q86SK9	A_23_P354965	0.281161	6.92535	3.32022	0.00436985	0.293344	1
ENSG00000104687	GSR	GSHR_HUMAN	P00390	A_23_P146084	-0.242125	10.3809	-3.31927	0.00437853	0.293344	1
ENSG00000186020	ZNF529	ZN529_HUMAN	Q6P280	A_23_P433676	0.229405	9.77836	3.31725	0.00439713	0.293344	1
ENSG00000100196	KDELR3	ERD23_HUMAN	O43731	A_23_P211504	0.271046	9.09315	3.3146	0.00442172	0.293344	1
ENSG00000015532	XYLT2	XYLT2_HUMAN	Q9H1B5	A_23_P15582	0.292438	13.5686	3.31413	0.00442607	0.293344	1
ENSG00000223768	-	-	-	A_32_P122940	0.25839	9.28698	3.31254	0.00444085	0.293344	1
ENSG00000121871	SLITRK3	SLIK3_HUMAN	O94933	A_23_P18362	0.317637	6.94036	3.31238	0.0044424	0.293344	1
ENSG00000089159	PXN	PAXI_HUMAN	P49023	A_24_P184555	-0.338472	13.7002	-3.31085	0.00445665	0.293344	1
ENSG00000177575	CD163	C163A_HUMAN	Q86VB7	A_23_P33723	0.213416	8.17499	3.31085	0.00445665	0.293344	1
ENSG00000141968	VAV1	VAV_HUMAN	P15498	A_23_P38959	-0.280579	7.48664	-3.30913	0.00447285	0.293344	1
ENSG00000007952	NOX1	NOX1_HUMAN	Q9Y5S8	A_23_P217280	0.280467	7.09504	3.30898	0.00447419	0.293344	1
ENSG00000270107	-	-	-	A_32_P34703	-0.46174	7.10618	-3.30897	0.00447429	0.293344	1
ENSG00000116774	OLFML3	OLFL3_HUMAN	Q9NRN5	A_24_P11315	-0.424482	8.91791	-3.3088	0.00447587	0.293344	1
ENSG00000163349	HIPK1	HIPK1_HUMAN	Q86Z02	A_24_P11315	-0.424482	8.91791	-3.3088	0.00447587	0.293344	1
ENSG00000188735	TMEM120B	T120B_HUMAN	A0PK00	A_24_P119131	0.215275	8.78247	3.30713	0.00449168	0.293446	1
ENSG00000198546	ZNF511	ZN511_HUMAN	Q8NB15	A_32_P182156	-0.259176	11.5234	-3.30674	0.00449528	0.293446	1
ENSG00000163956	LRPAP1	AMRP_HUMAN	P30533	A_24_P277331	0.218588	13.7461	3.30505	0.00451132	0.293446	1
ENSG00000166206	GABRB3	GBRB3_HUMAN	P28472	A_23_P10966	-0.27883	10.5929	-3.30359	0.00452512	0.293446	1
ENSG00000226387	-	-	-	A_32_P159083	-0.306378	6.99581	-3.30276	0.00453307	0.293446	1
ENSG00000102871	TRADD	TRADD_HUMAN	Q15628	A_23_P54649	0.301389	10.6856	3.30205	0.00453984	0.293446	1
ENSG00000025770	NCAPH2	CNDH2_HUMAN	Q6IBW4	A_23_P80398	-0.267575	11.4391	-3.29971	0.0045622	0.293446	1
ENSG00000112096	SOD2	SODM_HUMAN	P04179	A_24_P935819	-0.28232	7.0582	-3.2997	0.00456229	0.293446	1
ENSG00000096384	HSP90AB1	HS90B_HUMAN	P08238	A_24_P823684	-0.299903	12.683	-3.29733	0.00458501	0.293446	1
ENSG00000183199	-	-	-	A_24_P823684	-0.299903	12.683	-3.29733	0.00458501	0.293446	1
ENSG00000156587	UBE2L6	UB2L6_HUMAN	O14933	A_23_P75741	-0.23706	8.9968	-3.29723	0.00458594	0.293446	1
ENSG00000141985	SH3GL1	SH3G1_HUMAN	Q99961	A_23_P208925	-0.320002	9.33257	-3.29696	0.00458859	0.293446	1
ENSG00000254281	-	-	-	A_32_P165504	-0.262664	7.24453	-3.29624	0.00459551	0.293446	1
ENSG00000107147	KCNT1	KCNT1_HUMAN	Q5JUK3	A_24_P155169	-0.246386	7.13788	-3.29618	0.00459606	0.293446	1
ENSG00000136758	YME1L1	YMEL1_HUMAN	Q96TA2	A_24_P167052	0.231805	10.1772	3.29541	0.00460351	0.293446	1
ENSG00000185344	ATP6V0A2	VPP2_HUMAN	Q9Y487	A_23_P87513	0.291869	10.8133	3.29516	0.00460596	0.293446	1
ENSG00000197766	CFD	CFAD_HUMAN	P00746	A_23_P119562	0.265852	10.0791	3.29352	0.00462183	0.293704	1
ENSG00000178401	DNAJC22	DJC22_HUMAN	Q8N4W6	A_23_P253661	0.276556	8.60944	3.2929	0.00462781	0.293704	1
ENSG00000181143	MUC16	-	-	A_23_P5211	-0.246822	7.08239	-3.28999	0.00465621	0.293704	1
ENSG00000116641	DOCK7	DOCK7_HUMAN	Q96N67	A_32_P230547	0.304467	10.6449	3.28927	0.00466329	0.293704	1
ENSG00000105447	GRWD1	GRWD1_HUMAN	Q9BQ67	A_23_P142154	-0.259715	11.8203	-3.28858	0.00467007	0.293704	1
ENSG00000133687	TMTC1	TMTC1_HUMAN	Q8IUR5	A_23_P203957	0.206812	10.9394	3.28793	0.00467641	0.293704	1
ENSG00000187608	ISG15	ISG15_HUMAN	P05161	A_23_P819	0.310759	13.5093	3.28749	0.00468069	0.293704	1
ENSG00000114107	CEP70	CEP70_HUMAN	Q8NHQ1	A_23_P21473	0.301932	10.4978	3.28745	0.00468107	0.293704	1
ENSG00000158488	CD1E	CD1E_HUMAN	P15812	A_23_P310410	0.285982	6.82122	3.28617	0.00469367	0.293704	1
ENSG00000029534	ANK1	ANK1_HUMAN	P16157	A_23_P216108	-0.322885	8.14711	-3.28602	0.00469517	0.293704	1
ENSG00000136488	CSH1	CSH1_HUMAN	P0DML2	A_23_P381351	-0.327468	7.42799	-3.28589	0.0046965	0.293704	1
ENSG00000213218	CSH1	CSH2_HUMAN	P0DML3	A_23_P381351	-0.327468	7.42799	-3.28589	0.0046965	0.293704	1
ENSG00000213218	CSH2	CSH2_HUMAN	P0DML3	A_23_P381351	-0.327468	7.42799	-3.28589	0.0046965	0.293704	1
ENSG00000132507	EIF5A	IF5A1_HUMAN	P63241	A_24_P31235	-0.294595	12.0369	-3.28588	0.00469657	0.293704	1
ENSG00000178631	-	-	-	A_24_P475115	-0.32783	12.3588	-3.28524	0.00470293	0.293704	1
ENSG00000100387	RBX1	RBX1_HUMAN	P62877	A_23_P211550	0.272955	13.139	3.28299	0.00472511	0.294154	1
ENSG00000250328	-	-	-	A_32_P888644	0.300317	6.89835	3.28234	0.00473158	0.294154	1
ENSG00000179342	-	-	-	A_24_P127159	-0.231256	7.63122	-3.27947	0.00476013	0.294154	1
ENSG00000125398	SOX9	SOX9_HUMAN	P48436	A_23_P26847	-0.235642	7.0713	-3.27839	0.00477096	0.294154	1
ENSG00000146592	CREB5	CREB5_HUMAN	Q02930	A_24_P532232	-0.320235	8.11291	-3.2779	0.00477592	0.294154	1
ENSG00000161203	AP2M1	AP2M1_HUMAN	Q96CW1	A_23_P155624	-0.313667	13.3152	-3.27523	0.00480277	0.294711	1
ENSG00000033867	SLC4A7	S4A7_HUMAN	Q9Y6M7	A_23_P132468	-0.342524	9.9119	-3.27495	0.00480558	0.294711	1
ENSG00000168765	GSTM4	GSTM4_HUMAN	Q03013	A_24_P396662	-0.252488	8.68395	-3.27414	0.0048137	0.294711	1
ENSG00000136488	CSH1	CSH1_HUMAN	P0DML2	A_24_P211044	-0.534456	9.2182	-3.27357	0.00481946	0.294711	1
ENSG00000213218	CSH1	CSH2_HUMAN	P0DML3	A_24_P211044	-0.534456	9.2182	-3.27357	0.00481946	0.294711	1
ENSG00000213218	CSH2	CSH2_HUMAN	P0DML3	A_24_P211044	-0.534456	9.2182	-3.27357	0.00481946	0.294711	1
ENSG00000153029	MR1	HMR1_HUMAN	Q95460	A_23_P201837	0.211556	7.1654	3.27274	0.00482794	0.294791	1
ENSG00000104938	CLEC4M	CLC4M_HUMAN	Q9H2X3	A_24_P53465	-0.242632	7.03314	-3.27072	0.00484838	0.295192	1
ENSG00000111879	FAM184A	F184A_HUMAN	Q8NB25	A_23_P167818	0.238095	13.2214	3.27055	0.00485011	0.295192	1
ENSG00000127603	MACF1	MACF1_HUMAN	Q9UPN3	A_24_P418637	-0.219886	8.3571	-3.26879	0.00486811	0.295192	1
ENSG00000170266	GLB1	BGAL_HUMAN	P16278	A_23_P61531	0.273624	12.2525	3.26861	0.00486988	0.295192	1
ENSG00000224668	-	-	-	A_32_P186226	-0.325629	9.52569	-3.26784	0.00487781	0.295192	1
ENSG00000233966	-	-	-	A_32_P171328	-0.217832	14.2185	-3.26701	0.00488634	0.295192	1
ENSG00000108106	UBE2S	UBE2S_HUMAN	Q16763	A_32_P171328	-0.217832	14.2185	-3.26701	0.00488634	0.295192	1
ENSG00000224126	-	-	-	A_32_P171328	-0.217832	14.2185	-3.26701	0.00488634	0.295192	1
ENSG00000103449	SALL1	SALL1_HUMAN	Q9NSC2	A_23_P328074	0.341398	10.0557	3.26692	0.00488727	0.295192	1
ENSG00000198739	LRRTM3	LRRT3_HUMAN	Q86VH5	A_23_P366999	0.300608	6.80337	3.26533	0.0049035	0.295192	1
ENSG00000177427	MIEF2	MID49_HUMAN	Q96C03	A_23_P501372	0.23355	10.3554	3.26455	0.00491157	0.295192	1
ENSG00000241678	-	-	-	A_32_P875465	-0.382479	6.91266	-3.26354	0.00492202	0.295192	1
ENSG00000159082	SYNJ1	SYNJ1_HUMAN	O43426	A_23_P324718	0.205427	7.82637	3.26234	0.00493439	0.295192	1
ENSG00000125818	PSMF1	PSMF1_HUMAN	Q92530	A_24_P122050	-0.225339	9.89572	-3.26216	0.00493624	0.295192	1
ENSG00000174837	EMR1	EMR1_HUMAN	Q14246	A_23_P27556	-0.243891	7.0058	-3.26165	0.00494153	0.295192	1
ENSG00000105669	COPE	COPE_HUMAN	O14579	A_24_P399622	-0.249913	11.3736	-3.26158	0.00494225	0.295192	1
ENSG00000268193	-	-	-	A_24_P399622	-0.249913	11.3736	-3.26158	0.00494225	0.295192	1
ENSG00000173908	KRT28	K1C28_HUMAN	Q7Z3Y7	A_32_P489662	0.312006	7.02099	3.25992	0.00495949	0.295324	1
ENSG00000212124	TAS2R19	T2R19_HUMAN	P59542	A_23_P340312	-0.241342	7.05761	-3.25897	0.00496939	0.295324	1
ENSG00000204209	DAXX	DAXX_HUMAN	Q9UER7	A_23_P122579	-0.25221	10.5741	-3.25861	0.0049732	0.295324	1
ENSG00000117877	CD3EAP	RPA34_HUMAN	O15446	A_24_P267452	-0.378091	9.8981	-3.25696	0.00499039	0.295534	1
ENSG00000168040	FADD	FADD_HUMAN	Q13158	A_23_P86917	0.243673	14.3735	3.25662	0.004994	0.295534	1
ENSG00000156345	CDK20	CDK20_HUMAN	Q8IZL9	A_23_P20752	0.242295	9.75006	3.25519	0.00500893	0.295534	1
ENSG00000132406	TMEM128	TM128_HUMAN	Q5BJH2	A_23_P29924	0.212399	9.90075	3.2549	0.00501206	0.295534	1
ENSG00000166321	NUDT13	NUD13_HUMAN	Q86X67	A_32_P41471	0.310644	7.83174	3.2545	0.00501621	0.295534	1
ENSG00000196141	DKFZP564A2416	SPS2L_HUMAN	Q9NUQ6	A_23_P131255	-0.542706	13.541	-3.25373	0.0050243	0.295534	1
ENSG00000196141	SPATS2L	SPS2L_HUMAN	Q9NUQ6	A_23_P131255	-0.542706	13.541	-3.25373	0.0050243	0.295534	1
ENSG00000082212	ME2	MAOM_HUMAN	P23368	A_24_P348090	0.381495	11.5354	3.25347	0.00502709	0.295534	1
ENSG00000039319	ZFYVE16	ZFY16_HUMAN	Q7Z3T8	A_24_P239531	-0.35075	7.20932	-3.25259	0.00503635	0.295599	1
ENSG00000132664	POLR3F	RPC6_HUMAN	Q9H1D9	A_23_P166122	0.248283	9.89359	3.25143	0.00504862	0.295599	1
ENSG00000122482	ZNF644	ZN644_HUMAN	Q9H582	A_23_P200772	-0.409037	11.0291	-3.25132	0.00504978	0.295599	1
ENSG00000129151	BBOX1	BODG_HUMAN	O75936	A_23_P127495	0.287002	7.00278	3.24826	0.00508236	0.297083	1
ENSG00000111276	CDKN1B	CDN1B_HUMAN	P46527	A_24_P81841	0.263763	10.3176	3.24415	0.00512632	0.297266	1
ENSG00000113578	FGF1	FGF1_HUMAN	P05230	A_24_P251969	-0.279312	7.1443	-3.24356	0.00513266	0.297266	1
ENSG00000267153	-	-	-	A_24_P229903	-0.335376	10.2846	-3.24263	0.00514267	0.297266	1
ENSG00000251192	ZNF674	ZN674_HUMAN	Q2M3X9	A_24_P92558	-0.272822	7.19624	-3.24142	0.00515575	0.297266	1
ENSG00000198937	CCDC167	CC167_HUMAN	Q9P0B6	A_23_P133770	0.229413	11.7192	3.24107	0.00515956	0.297266	1
ENSG00000171811	CFAP46	CFA46_HUMAN	Q8IYW2	A_23_P311713	0.225209	7.72465	3.24081	0.00516237	0.297266	1
ENSG00000171811	TTC40	CFA46_HUMAN	Q8IYW2	A_23_P311713	0.225209	7.72465	3.24081	0.00516237	0.297266	1
ENSG00000006740	ARHGAP44	RHG44_HUMAN	Q17R89	A_24_P942385	-0.263497	7.38141	-3.24023	0.00516868	0.297266	1
ENSG00000267449	-	-	-	A_32_P132337	-0.229217	12.137	-3.2402	0.00516896	0.297266	1
ENSG00000269888	-	-	-	A_32_P132337	-0.229217	12.137	-3.2402	0.00516896	0.297266	1
ENSG00000110906	KCTD10	BACD3_HUMAN	Q9H3F6	A_24_P39101	0.261143	9.5789	3.24011	0.00516996	0.297266	1
ENSG00000106852	LHX6	LHX6_HUMAN	Q9UPM6	A_23_P32175	-0.291331	7.65886	-3.24009	0.00517011	0.297266	1
ENSG00000197565	COL4A6	CO4A6_HUMAN	Q14031	A_23_P217379	0.295752	12.8072	3.23958	0.00517571	0.297266	1
ENSG00000184995	IFNE	IFNE_HUMAN	Q86WN2	A_23_P302060	0.192172	7.17543	3.23849	0.00518748	0.297266	1
ENSG00000113552	GNPDA1	GNPI1_HUMAN	P46926	A_23_P144622	-0.281287	9.91249	-3.23812	0.00519151	0.297266	1
ENSG00000253671	-	-	-	A_32_P54628	-0.281375	6.87079	-3.23706	0.00520309	0.297266	1
ENSG00000169291	SHE	SHE_HUMAN	Q5VZ18	A_23_P400716	0.193016	6.96225	3.23534	0.00522192	0.297266	1
ENSG00000074695	LMAN1	LMAN1_HUMAN	P49257	A_23_P78342	0.230879	9.51863	3.23505	0.00522503	0.297266	1
ENSG00000129351	ILF3	ILF3_HUMAN	Q12906	A_23_P329152	-0.266118	11.8796	-3.23491	0.00522658	0.297266	1
ENSG00000126107	HECTD3	HECD3_HUMAN	Q5T447	A_23_P149221	-0.323883	9.29986	-3.23459	0.00523018	0.297266	1
ENSG00000183454	GRIN2A	NMDE1_HUMAN	Q12879	A_24_P381844	-0.316626	7.00639	-3.23268	0.00525115	0.297438	1
ENSG00000169856	ONECUT1	HNF6_HUMAN	Q9UBC0	A_23_P340717	-0.238872	7.17948	-3.23234	0.0052549	0.297438	1
ENSG00000165480	SKA3	SKA3_HUMAN	Q8IX90	A_23_P340909	-0.295476	11.3625	-3.23022	0.00527829	0.297545	1
ENSG00000269235	-	-	-	A_24_P367762	0.267978	7.08669	3.22851	0.0052972	0.297545	1
ENSG00000055813	CCDC85A	CC85A_HUMAN	Q96PX6	A_23_P349566	0.249025	7.0472	3.22832	0.00529934	0.297545	1
ENSG00000271894	-	-	-	A_23_P349566	0.249025	7.0472	3.22832	0.00529934	0.297545	1
ENSG00000186297	GABRA5	GBRA5_HUMAN	P31644	A_23_P436618	-0.229798	7.41302	-3.22533	0.00533262	0.297545	1
ENSG00000179300	ZCCHC5	ZCHC5_HUMAN	Q8N8U3	A_23_P411353	-0.311664	6.93711	-3.22428	0.0053444	0.297545	1
ENSG00000197879	MYO1C	MYO1C_HUMAN	O00159	A_23_P416656	-0.311925	9.16188	-3.22427	0.00534454	0.297545	1
ENSG00000213625	LEPROT	OBRG_HUMAN	O15243	A_23_P1126	-0.271693	12.2536	-3.22414	0.00534597	0.297545	1
ENSG00000148604	RGR	RGR_HUMAN	P47804	A_24_P103911	0.248472	6.98671	3.2237	0.00535096	0.297545	1
ENSG00000170262	MRAP	MRAP_HUMAN	Q8TCY5	A_24_P126210	-0.254187	7.01394	-3.22342	0.00535408	0.297545	1
ENSG00000184560	C17orf74	CQ074_HUMAN	Q0P670	A_32_P524614	0.222301	7.64639	3.22259	0.00536342	0.297545	1
ENSG00000204531	POU5F1	PO5F1_HUMAN	Q01860	A_23_P59138	-0.40813	16.8114	-3.22059	0.00538596	0.297545	1
ENSG00000212993	POU5F1B	P5F1B_HUMAN	Q06416	A_23_P59138	-0.40813	16.8114	-3.22059	0.00538596	0.297545	1
ENSG00000235602	-	-	-	A_23_P59138	-0.40813	16.8114	-3.22059	0.00538596	0.297545	1
ENSG00000237872	-	-	-	A_23_P59138	-0.40813	16.8114	-3.22059	0.00538596	0.297545	1
ENSG00000050767	COL23A1	CONA1_HUMAN	Q86Y22	A_23_P387031	0.255782	11.2345	3.2197	0.00539595	0.297545	1
ENSG00000089902	RCOR1	RCOR1_HUMAN	Q9UKL0	A_24_P87257	-0.21948	7.24912	-3.21969	0.00539611	0.297545	1
ENSG00000239704	CDRT4	CDRT4_HUMAN	Q8N9R6	A_23_P427083	0.233215	9.57471	3.21923	0.00540132	0.297545	1
ENSG00000259024	TVP23C	-	-	A_23_P427083	0.233215	9.57471	3.21923	0.00540132	0.297545	1
ENSG00000111642	CHD4	CHD4_HUMAN	Q14839	A_23_P53541	-0.279744	11.5532	-3.21613	0.0054365	0.297545	1
ENSG00000109111	SUPT6H	SPT6H_HUMAN	Q7KZ85	A_24_P126873	-0.276946	8.73855	-3.21441	0.00545613	0.297545	1
ENSG00000196787	HIST1H2AG	H2A1_HUMAN	P0C0S8	A_24_P303354	-0.310049	13.4432	-3.21428	0.00545758	0.297545	1
ENSG00000196787	HIST1H2AI	H2A1_HUMAN	P0C0S8	A_24_P303354	-0.310049	13.4432	-3.21428	0.00545758	0.297545	1
ENSG00000196787	HIST1H2AK	H2A1_HUMAN	P0C0S8	A_24_P303354	-0.310049	13.4432	-3.21428	0.00545758	0.297545	1
ENSG00000196787	HIST1H2AL	H2A1_HUMAN	P0C0S8	A_24_P303354	-0.310049	13.4432	-3.21428	0.00545758	0.297545	1
ENSG00000196787	HIST1H2AM	H2A1_HUMAN	P0C0S8	A_24_P303354	-0.310049	13.4432	-3.21428	0.00545758	0.297545	1
ENSG00000177432	NAP1L5	NP1L5_HUMAN	Q96NT1	A_24_P166073	0.209359	7.29996	3.21373	0.00546391	0.297545	1
ENSG00000169758	C15orf27	CO027_HUMAN	Q2M3C6	A_23_P88678	0.317025	9.29559	3.21367	0.00546456	0.297545	1
ENSG00000140259	MFAP1	MFAP1_HUMAN	P55081	A_23_P14636	0.258292	11.6624	3.21364	0.00546487	0.297545	1
ENSG00000272620	-	-	-	A_32_P178092	-0.251608	7.02987	-3.21283	0.0054742	0.297545	1
ENSG00000183853	KIRREL	KIRR1_HUMAN	Q96J84	A_23_P113994	-0.277128	8.04075	-3.21245	0.00547853	0.297545	1
ENSG00000130204	TOMM40	TOM40_HUMAN	O96008	A_23_P153266	-0.228684	12.3663	-3.2124	0.00547919	0.297545	1
ENSG00000124333	VAMP7	VAMP7_HUMAN	P51809	A_23_P22671	0.232695	10.9425	3.21234	0.00547981	0.297545	1
ENSG00000127589	-	-	-	A_32_P78528	-0.227269	14.2224	-3.21123	0.0054926	0.297545	1
ENSG00000177119	ANO6	ANO6_HUMAN	Q4KMQ2	A_23_P389118	0.265937	11.1815	3.21068	0.00549894	0.297545	1
ENSG00000135299	ANKRD6	ANKR6_HUMAN	Q9Y2G4	A_23_P70297	0.293138	10.5864	3.21021	0.00550434	0.297545	1
ENSG00000172318	B3GALT1	B3GT1_HUMAN	Q9Y5Z6	A_23_P108564	-0.277975	7.92473	-3.21004	0.00550636	0.297545	1
ENSG00000107201	DDX58	DDX58_HUMAN	O95786	A_23_P20814	0.287739	10.8431	3.2091	0.00551713	0.297545	1
ENSG00000053254	FOXN3	FOXN3_HUMAN	O00409	A_23_P88435	-0.376333	9.56426	-3.20907	0.00551746	0.297545	1
ENSG00000168418	KCNG4	KCNG4_HUMAN	Q8TDN1	A_23_P206336	0.281415	7.03396	3.2031	0.00558691	0.299249	1
ENSG00000137959	IFI44L	IF44L_HUMAN	Q53G44	A_23_P45871	0.358373	7.08385	3.20271	0.00559157	0.299249	1
ENSG00000144445	KANSL1L	KAL1L_HUMAN	A0AUZ9	A_23_P400373	0.228443	8.17111	3.2026	0.00559276	0.299249	1
ENSG00000170852	KBTBD2	KBTB2_HUMAN	Q8IY47	A_24_P12539	0.217352	9.07806	3.20176	0.00560271	0.299392	1
ENSG00000162623	TYW3	TYW3_HUMAN	Q6IPR3	A_24_P396327	-0.350123	6.96796	-3.19882	0.00563728	0.299491	1
ENSG00000267882	-	-	-	A_32_P314783	-0.247473	7.05058	-3.19686	0.0056605	0.299491	1
ENSG00000186377	CYP4X1	CP4X1_HUMAN	Q8N118	A_24_P293530	0.282923	7.9583	3.19674	0.00566188	0.299491	1
ENSG00000149187	CELF1	CELF1_HUMAN	Q92879	A_23_P318396	-0.329424	9.43309	-3.19648	0.005665	0.299491	1
ENSG00000043143	JADE2	JADE2_HUMAN	Q9NQC1	A_24_P226278	-0.24388	9.74459	-3.19642	0.00566572	0.299491	1
ENSG00000106302	HYAL4	HYAL4_HUMAN	Q2M3T9	A_23_P250228	0.243583	7.15097	3.19611	0.00566943	0.299491	1
ENSG00000166329	CCDC182	CC182_HUMAN	A6NF36	A_24_P195102	0.311854	6.95299	3.19596	0.00567111	0.299491	1
ENSG00000081913	PHLPP1	PHLP1_HUMAN	O60346	A_23_P89762	-0.325671	8.91345	-3.19543	0.00567745	0.299491	1
ENSG00000133135	RNF128	RN128_HUMAN	Q8TEB7	A_24_P340036	0.250339	7.03645	3.19409	0.00569347	0.299951	1
ENSG00000134909	ARHGAP32	RHG32_HUMAN	A7KAX9	A_24_P42436	-0.229973	7.48603	-3.19239	0.00571376	0.300278	1
ENSG00000154096	THY1	THY1_HUMAN	P04216	A_23_P36364	-0.334182	13.1356	-3.19222	0.00571578	0.300278	1
ENSG00000008294	SPAG9	JIP4_HUMAN	O60271	A_24_P942469	0.255724	9.7694	3.19162	0.00572289	0.300278	1
ENSG00000246662	-	-	-	A_32_P160388	0.292259	6.99203	3.18979	0.00574495	0.300278	1
ENSG00000276180	HIST1H4A	H4_HUMAN	P62805	A_24_P20873	-0.306983	11.6963	-3.18887	0.00575598	0.300278	1
ENSG00000276180	HIST1H4B	H4_HUMAN	P62805	A_24_P20873	-0.306983	11.6963	-3.18887	0.00575598	0.300278	1
ENSG00000276180	HIST1H4C	H4_HUMAN	P62805	A_24_P20873	-0.306983	11.6963	-3.18887	0.00575598	0.300278	1
ENSG00000276180	HIST1H4D	H4_HUMAN	P62805	A_24_P20873	-0.306983	11.6963	-3.18887	0.00575598	0.300278	1
ENSG00000276180	HIST1H4E	H4_HUMAN	P62805	A_24_P20873	-0.306983	11.6963	-3.18887	0.00575598	0.300278	1
ENSG00000276180	HIST1H4F	H4_HUMAN	P62805	A_24_P20873	-0.306983	11.6963	-3.18887	0.00575598	0.300278	1
ENSG00000276180	HIST1H4H	H4_HUMAN	P62805	A_24_P20873	-0.306983	11.6963	-3.18887	0.00575598	0.300278	1
ENSG00000276180	HIST1H4I	H4_HUMAN	P62805	A_24_P20873	-0.306983	11.6963	-3.18887	0.00575598	0.300278	1
ENSG00000276180	HIST1H4J	H4_HUMAN	P62805	A_24_P20873	-0.306983	11.6963	-3.18887	0.00575598	0.300278	1
ENSG00000276180	HIST1H4K	H4_HUMAN	P62805	A_24_P20873	-0.306983	11.6963	-3.18887	0.00575598	0.300278	1
ENSG00000276180	HIST1H4L	H4_HUMAN	P62805	A_24_P20873	-0.306983	11.6963	-3.18887	0.00575598	0.300278	1
ENSG00000276180	HIST2H4A	H4_HUMAN	P62805	A_24_P20873	-0.306983	11.6963	-3.18887	0.00575598	0.300278	1
ENSG00000276180	HIST2H4B	H4_HUMAN	P62805	A_24_P20873	-0.306983	11.6963	-3.18887	0.00575598	0.300278	1
ENSG00000276180	HIST4H4	H4_HUMAN	P62805	A_24_P20873	-0.306983	11.6963	-3.18887	0.00575598	0.300278	1
ENSG00000171310	CHST11	CHSTB_HUMAN	Q9NPF2	A_32_P99171	0.265331	9.51824	3.18872	0.00575784	0.300278	1
ENSG00000046651	OFD1	OFD1_HUMAN	O75665	A_23_P254226	-0.217287	8.76001	-3.18853	0.00576007	0.300278	1
ENSG00000100422	CERK	CERK1_HUMAN	Q8TCT0	A_24_P62237	-0.256116	10.8607	-3.18677	0.00578135	0.300278	1
ENSG00000168078	PBK	TOPK_HUMAN	Q96KB5	A_32_P62997	0.296202	9.61584	3.18603	0.00579031	0.300278	1
ENSG00000170959	DCDC1	DCDC1_HUMAN	P59894	A_23_P413862	-0.259784	7.23336	-3.18577	0.00579343	0.300278	1
ENSG00000204475	NCR3	NCTR3_HUMAN	O14931	A_32_P468522	0.227005	7.39086	3.18139	0.00584689	0.300278	1
ENSG00000100311	PDGFB	PDGFB_HUMAN	P01127	A_24_P339944	-0.343239	8.89267	-3.18059	0.0058567	0.300278	1
ENSG00000196418	ZNF124	ZN124_HUMAN	Q15973	A_32_P875758	0.291037	9.67811	3.18041	0.00585892	0.300278	1
ENSG00000117625	RCOR3	RCOR3_HUMAN	Q9P2K3	A_32_P167122	0.318899	10.0832	3.17989	0.00586531	0.300278	1
ENSG00000162994	CLHC1	CLHC1_HUMAN	Q8NHS4	A_23_P257417	0.208482	7.93344	3.17965	0.0058682	0.300278	1
ENSG00000198270	TMEM116	TM116_HUMAN	Q8NCL8	A_23_P105619	0.222047	9.67462	3.17949	0.00587022	0.300278	1
ENSG00000138802	SEC24B	SC24B_HUMAN	O95487	A_23_P69683	0.288574	9.7025	3.17783	0.00589058	0.300278	1
ENSG00000164008	C1orf50	CA050_HUMAN	Q9BV19	A_23_P74435	0.185861	10.9793	3.17767	0.00589259	0.300278	1
ENSG00000197641	SERPINB13	SPB13_HUMAN	Q9UIV8	A_23_P119015	0.212333	6.88418	3.17765	0.00589288	0.300278	1
ENSG00000156515	HK1	HXK1_HUMAN	P19367	A_24_P367965	-0.230273	7.07345	-3.17708	0.00589986	0.300278	1
ENSG00000113645	WWC1	KIBRA_HUMAN	Q8IX03	A_23_P81392	-0.257275	9.72951	-3.17672	0.00590433	0.300278	1
ENSG00000108018	SORCS1	SORC1_HUMAN	Q8WY21	A_23_P352932	0.3346	10.8275	3.17619	0.00591089	0.300278	1
ENSG00000157181	ODR4	ODR4_HUMAN	Q5SWX8	A_23_P284	0.219128	9.94878	3.17568	0.00591716	0.300278	1
ENSG00000266028	SRGAP2	-	-	A_23_P200829	0.269451	12.9903	3.17515	0.0059237	0.300278	1
ENSG00000168298	HIST1H1E	H14_HUMAN	P10412	A_23_P7976	-0.315554	12.5188	-3.17449	0.00593191	0.300278	1
ENSG00000073803	MAP3K13	M3K13_HUMAN	O43283	A_24_P696742	0.209661	10.2617	3.17413	0.00593638	0.300278	1
ENSG00000254838	-	-	-	A_23_P75848	-0.2123	6.98067	-3.17361	0.00594288	0.300278	1
ENSG00000197061	HIST1H4A	H4_HUMAN	P62805	A_23_P214487	-0.250145	16.4141	-3.17281	0.00595287	0.300278	1
ENSG00000197061	HIST1H4B	H4_HUMAN	P62805	A_23_P214487	-0.250145	16.4141	-3.17281	0.00595287	0.300278	1
ENSG00000197061	HIST1H4C	H4_HUMAN	P62805	A_23_P214487	-0.250145	16.4141	-3.17281	0.00595287	0.300278	1
ENSG00000197061	HIST1H4D	H4_HUMAN	P62805	A_23_P214487	-0.250145	16.4141	-3.17281	0.00595287	0.300278	1
ENSG00000197061	HIST1H4E	H4_HUMAN	P62805	A_23_P214487	-0.250145	16.4141	-3.17281	0.00595287	0.300278	1
ENSG00000197061	HIST1H4F	H4_HUMAN	P62805	A_23_P214487	-0.250145	16.4141	-3.17281	0.00595287	0.300278	1
ENSG00000197061	HIST1H4H	H4_HUMAN	P62805	A_23_P214487	-0.250145	16.4141	-3.17281	0.00595287	0.300278	1
ENSG00000197061	HIST1H4I	H4_HUMAN	P62805	A_23_P214487	-0.250145	16.4141	-3.17281	0.00595287	0.300278	1
ENSG00000197061	HIST1H4J	H4_HUMAN	P62805	A_23_P214487	-0.250145	16.4141	-3.17281	0.00595287	0.300278	1
ENSG00000197061	HIST1H4K	H4_HUMAN	P62805	A_23_P214487	-0.250145	16.4141	-3.17281	0.00595287	0.300278	1
ENSG00000197061	HIST1H4L	H4_HUMAN	P62805	A_23_P214487	-0.250145	16.4141	-3.17281	0.00595287	0.300278	1
ENSG00000197061	HIST2H4A	H4_HUMAN	P62805	A_23_P214487	-0.250145	16.4141	-3.17281	0.00595287	0.300278	1
ENSG00000197061	HIST2H4B	H4_HUMAN	P62805	A_23_P214487	-0.250145	16.4141	-3.17281	0.00595287	0.300278	1
ENSG00000197061	HIST4H4	H4_HUMAN	P62805	A_23_P214487	-0.250145	16.4141	-3.17281	0.00595287	0.300278	1
ENSG00000250361	GYPB	GLPB_HUMAN	P06028	A_23_P212854	0.204119	7.36564	3.17224	0.00595995	0.300278	1
ENSG00000169247	SH3TC2	S3TC2_HUMAN	Q8TF17	A_32_P305888	0.209881	7.08522	3.17189	0.00596434	0.300278	1
ENSG00000104369	JPH1	JPH1_HUMAN	Q9HDC5	A_23_P434253	-0.22856	7.63275	-3.17076	0.00597841	0.300278	1
ENSG00000188343	FAM92A1	F92A1_HUMAN	A1XBS5	A_32_P103695	0.259522	11.1897	3.16999	0.00598808	0.300278	1
ENSG00000177192	PUS1	TRUA_HUMAN	Q9Y606	A_24_P335358	-0.237485	10.4818	-3.1695	0.00599425	0.300278	1
ENSG00000206418	RAB12	RAB12_HUMAN	Q6IQ22	A_24_P53353	-0.204115	7.96647	-3.16817	0.00601088	0.300278	1
ENSG00000267149	-	-	-	A_23_P39185	-0.279616	8.58692	-3.16628	0.00603477	0.300278	1
ENSG00000160439	RDH13	RDH13_HUMAN	Q8NBN7	A_23_P39185	-0.279616	8.58692	-3.16628	0.00603477	0.300278	1
ENSG00000174628	IQCK	IQCK_HUMAN	Q8N0W5	A_23_P324523	0.287151	10.2943	3.16612	0.00603679	0.300278	1
ENSG00000197629	MPEG1	MPEG1_HUMAN	Q2M385	A_23_P127727	0.310332	7.19374	3.16577	0.0060412	0.300278	1
ENSG00000069399	BCL3	BCL3_HUMAN	P20749	A_23_P4662	0.235169	10.082	3.16428	0.00606013	0.300278	1
ENSG00000204531	POU5F1	PO5F1_HUMAN	Q01860	A_24_P340659	-0.477948	13.4644	-3.16384	0.00606564	0.300278	1
ENSG00000206454	POU5F1	PO5F1_HUMAN	Q01860	A_24_P340659	-0.477948	13.4644	-3.16384	0.00606564	0.300278	1
ENSG00000235068	POU5F1	PO5F1_HUMAN	Q01860	A_24_P340659	-0.477948	13.4644	-3.16384	0.00606564	0.300278	1
ENSG00000229094	POU5F1	PO5F1_HUMAN	Q01860	A_24_P340659	-0.477948	13.4644	-3.16384	0.00606564	0.300278	1
ENSG00000237582	POU5F1	PO5F1_HUMAN	Q01860	A_24_P340659	-0.477948	13.4644	-3.16384	0.00606564	0.300278	1
ENSG00000233911	POU5F1	PO5F1_HUMAN	Q01860	A_24_P340659	-0.477948	13.4644	-3.16384	0.00606564	0.300278	1
ENSG00000237872	-	-	-	A_24_P340659	-0.477948	13.4644	-3.16384	0.00606564	0.300278	1
ENSG00000230336	POU5F1	PO5F1_HUMAN	Q01860	A_24_P340659	-0.477948	13.4644	-3.16384	0.00606564	0.300278	1
ENSG00000221963	APOL6	APOL6_HUMAN	Q9BWW8	A_23_P155049	-0.256511	6.93296	-3.16383	0.00606573	0.300278	1
ENSG00000279680	HSFY1	HSFY1_HUMAN	Q96LI6	A_23_P62446	0.221716	7.29562	3.16331	0.00607234	0.300278	1
ENSG00000279680	HSFY2	HSFY1_HUMAN	Q96LI6	A_23_P62446	0.221716	7.29562	3.16331	0.00607234	0.300278	1
ENSG00000280031	-	-	-	A_23_P62446	0.221716	7.29562	3.16331	0.00607234	0.300278	1
ENSG00000280293	-	-	-	A_23_P62446	0.221716	7.29562	3.16331	0.00607234	0.300278	1
ENSG00000279079	HSFY1	HSFY1_HUMAN	Q96LI6	A_23_P62446	0.221716	7.29562	3.16331	0.00607234	0.300278	1
ENSG00000279079	HSFY2	HSFY1_HUMAN	Q96LI6	A_23_P62446	0.221716	7.29562	3.16331	0.00607234	0.300278	1
ENSG00000251510	-	-	-	A_23_P62446	0.221716	7.29562	3.16331	0.00607234	0.300278	1
ENSG00000172468	HSFY1	HSFY1_HUMAN	Q96LI6	A_23_P62446	0.221716	7.29562	3.16331	0.00607234	0.300278	1
ENSG00000172468	HSFY2	HSFY1_HUMAN	Q96LI6	A_23_P62446	0.221716	7.29562	3.16331	0.00607234	0.300278	1
ENSG00000169953	HSFY1	HSFY1_HUMAN	Q96LI6	A_23_P62446	0.221716	7.29562	3.16331	0.00607234	0.300278	1
ENSG00000169953	HSFY2	HSFY1_HUMAN	Q96LI6	A_23_P62446	0.221716	7.29562	3.16331	0.00607234	0.300278	1
ENSG00000135829	DHX9	DHX9_HUMAN	Q08211	A_24_P36847	-0.280995	11.6172	-3.16199	0.0060892	0.300749	1
ENSG00000111913	FAM65B	FA65B_HUMAN	Q9Y4F9	A_23_P358394	-0.255436	8.22739	-3.16067	0.00610605	0.300925	1
ENSG00000204356	NELFE	NELFE_HUMAN	P18615	A_23_P122545	0.225549	13.6802	3.15991	0.00611579	0.300925	1
ENSG00000279158	VCY	VCY1_HUMAN	O14598	A_23_P11390	0.27672	9.12833	3.15961	0.00611964	0.300925	1
ENSG00000279158	VCY1B	VCY1_HUMAN	O14598	A_23_P11390	0.27672	9.12833	3.15961	0.00611964	0.300925	1
ENSG00000279451	VCY	VCY1_HUMAN	O14598	A_23_P11390	0.27672	9.12833	3.15961	0.00611964	0.300925	1
ENSG00000279451	VCY1B	VCY1_HUMAN	O14598	A_23_P11390	0.27672	9.12833	3.15961	0.00611964	0.300925	1
ENSG00000129864	VCY	VCY1_HUMAN	O14598	A_23_P11390	0.27672	9.12833	3.15961	0.00611964	0.300925	1
ENSG00000129864	VCY1B	VCY1_HUMAN	O14598	A_23_P11390	0.27672	9.12833	3.15961	0.00611964	0.300925	1
ENSG00000129862	VCY	VCY1_HUMAN	O14598	A_23_P11390	0.27672	9.12833	3.15961	0.00611964	0.300925	1
ENSG00000129862	VCY1B	VCY1_HUMAN	O14598	A_23_P11390	0.27672	9.12833	3.15961	0.00611964	0.300925	1
ENSG00000111897	SERINC1	SERC1_HUMAN	Q9NRX5	A_24_P129232	0.262951	11.4569	3.15854	0.00613336	0.300925	1
ENSG00000197943	PLCG2	PLCG2_HUMAN	P16885	A_23_P106675	0.229457	9.71638	3.15833	0.00613604	0.300925	1
ENSG00000176723	ZNF843	ZN843_HUMAN	Q8N446	A_24_P161144	0.197909	7.92346	3.15828	0.00613669	0.300925	1
ENSG00000104964	AES	AES_HUMAN	Q08117	A_23_P165061	0.221394	14.0923	3.15654	0.00615908	0.301612	1
ENSG00000116406	EDEM3	EDEM3_HUMAN	Q9BZQ6	A_24_P208045	0.227429	9.95157	3.15605	0.00616538	0.301612	1
ENSG00000280212	-	-	-	A_23_P101121	-0.235839	8.4722	-3.15506	0.00617814	0.301672	1
ENSG00000167216	KATNAL2	KATL2_HUMAN	Q8IYT4	A_23_P101121	-0.235839	8.4722	-3.15506	0.00617814	0.301672	1
ENSG00000170027	YWHAG	1433G_HUMAN	P61981	A_23_P123022	-0.222775	8.9656	-3.154	0.00619186	0.301672	1
ENSG00000174130	TLR6	TLR6_HUMAN	Q9Y2C9	A_24_P17677	0.308156	7.01299	3.15399	0.00619202	0.301672	1
ENSG00000141448	GATA6	GATA6_HUMAN	Q92908	A_23_P304450	0.357591	13.5739	3.15318	0.00620246	0.301672	1
ENSG00000153395	LPCAT1	PCAT1_HUMAN	Q8NF37	A_23_P213471	-0.234052	7.74594	-3.15228	0.00621415	0.301672	1
ENSG00000129187	DCTD	DCTD_HUMAN	P32321	A_24_P345948	0.235042	12.0314	3.15054	0.00623687	0.301672	1
ENSG00000157483	MYO1E	MYO1E_HUMAN	Q12965	A_23_P37503	-0.234833	8.55285	-3.15027	0.00624036	0.301672	1
ENSG00000131242	RAB11FIP4	RFIP4_HUMAN	Q86YS3	A_24_P401909	-0.26607	7.83507	-3.14985	0.00624585	0.301672	1
ENSG00000105401	CDC37	CDC37_HUMAN	Q16543	A_23_P130531	-0.228069	11.8134	-3.14933	0.00625256	0.301672	1
ENSG00000186193	SAPCD2	SAPC2_HUMAN	Q86UD0	A_24_P100517	-0.282628	10.3393	-3.14807	0.00626918	0.301672	1
ENSG00000090621	PABPC4	PABP4_HUMAN	Q13310	A_23_P51718	-0.251728	9.04103	-3.1474	0.00627795	0.301672	1
ENSG00000017797	RALBP1	RBP1_HUMAN	Q15311	A_23_P376599	0.222956	13.6082	3.14717	0.00628093	0.301672	1
ENSG00000168806	LCMT2	TYW4_HUMAN	O60294	A_23_P106505	0.270383	10.4882	3.1471	0.00628186	0.301672	1
ENSG00000214548	-	-	-	A_24_P463973	-0.253931	6.99034	-3.14641	0.00629094	0.301672	1
ENSG00000182944	EWSR1	EWS_HUMAN	Q01844	A_23_P91657	-0.248954	11.7709	-3.14594	0.00629705	0.301672	1
ENSG00000145681	HAPLN1	HPLN1_HUMAN	P10915	A_23_P7727	-0.310271	7.06921	-3.14351	0.00632916	0.302487	1
ENSG00000149292	TTC12	TTC12_HUMAN	Q9H892	A_23_P24535	0.20126	10.6844	3.14164	0.006354	0.302487	1
ENSG00000131507	NDFIP1	NFIP1_HUMAN	Q9BT67	A_23_P81241	0.207823	11.7911	3.14122	0.00635955	0.302487	1
ENSG00000090097	PCBP4	PCBP4_HUMAN	P57723	A_23_P166807	0.241324	13.3372	3.14042	0.00637028	0.302487	1
ENSG00000086475	SEPHS1	SPS1_HUMAN	P49903	A_24_P90022	-0.323728	13.3634	-3.13957	0.00638152	0.302487	1
ENSG00000273820	USP27X	UBP27_HUMAN	A6NNY8	A_24_P322908	0.19956	8.87986	3.13954	0.00638201	0.302487	1
ENSG00000189376	C8orf76	CH076_HUMAN	Q96K31	A_23_P31747	0.209254	11.8519	3.13843	0.00639678	0.302812	1
ENSG00000172059	KLF11	KLF11_HUMAN	O14901	A_23_P44505	0.195791	9.24454	3.13792	0.0064036	0.302812	1
ENSG00000072110	ACTN1	ACTN1_HUMAN	P12814	A_24_P107695	-0.307762	12.8373	-3.13476	0.00644608	0.303677	1
ENSG00000089327	FXYD5	FXYD5_HUMAN	Q96DB9	A_24_P194081	-0.227151	9.81162	-3.13461	0.00644806	0.303677	1
ENSG00000089091	DZANK1	DZAN1_HUMAN	Q9NVP4	A_24_P408297	0.315427	8.88418	3.13357	0.00646219	0.303677	1
ENSG00000180011	ZADH2	ZADH2_HUMAN	Q8N4Q0	A_32_P177300	-0.250458	7.08302	-3.1333	0.00646577	0.303677	1
ENSG00000136014	USP44	UBP44_HUMAN	Q9H0E7	A_23_P72770	-0.506242	9.66789	-3.13317	0.00646748	0.303677	1
ENSG00000162522	KIAA1522	K1522_HUMAN	Q9P206	A_23_P410965	0.212199	12.2593	3.13296	0.0064704	0.303677	1
ENSG00000197818	SLC9A8	SL9A8_HUMAN	Q9Y2E8	A_24_P58054	0.194533	8.26487	3.13174	0.00648696	0.303677	1
ENSG00000185290	NUPR1L	NUR1L_HUMAN	A6NF83	A_32_P42964	0.212613	8.55376	3.13164	0.00648824	0.303677	1
ENSG00000117724	CENPF	CENPF_HUMAN	P49454	A_23_P401	-0.289345	13.1593	-3.13155	0.00648941	0.303677	1
ENSG00000213047	DENND1B	DEN1B_HUMAN	Q6P3S1	A_23_P320897	0.225424	8.39603	3.13108	0.00649581	0.303677	1
ENSG00000164270	HTR4	5HT4R_HUMAN	Q13639	A_24_P234768	-0.332912	6.95184	-3.12808	0.00653678	0.30394	1
ENSG00000228376	-	-	-	A_24_P753476	0.259082	9.92878	3.12694	0.00655228	0.30394	1
ENSG00000161654	LSM12	LSM12_HUMAN	Q3MHD2	A_23_P307430	-0.26214	11.7949	-3.1262	0.0065624	0.30394	1
ENSG00000137486	ARRB1	ARRB1_HUMAN	P49407	A_23_P203702	0.254488	11.5707	3.1258	0.00656793	0.30394	1
ENSG00000133243	BTBD2	BTBD2_HUMAN	Q9BX70	A_23_P153698	-0.329817	10.8645	-3.12566	0.0065698	0.30394	1
ENSG00000172785	CBWD1	CBWD1_HUMAN	Q9BRT8	A_32_P161432	0.239331	11.8342	3.12537	0.00657383	0.30394	1
ENSG00000136682	CBWD2	CBWD2_HUMAN	Q8IUF1	A_32_P161432	0.239331	11.8342	3.12537	0.00657383	0.30394	1
ENSG00000116044	NFE2L2	NF2L2_HUMAN	Q16236	A_23_P5761	0.218674	11.7088	3.12475	0.0065824	0.30394	1
ENSG00000073060	SCARB1	SCRB1_HUMAN	Q8WTV0	A_23_P203900	-0.237381	13.1307	-3.12408	0.00659153	0.30394	1
ENSG00000047346	FAM214A	F214A_HUMAN	Q32MH5	A_23_P99853	0.274824	10.8671	3.12331	0.00660227	0.30394	1
ENSG00000197905	TEAD4	TEAD4_HUMAN	Q15561	A_23_P94795	-0.302953	11.1859	-3.12265	0.00661133	0.30394	1
ENSG00000183691	NOG	NOGG_HUMAN	Q13253	A_23_P341938	0.203562	7.208	3.12157	0.00662625	0.30394	1
ENSG00000188157	AGRN	AGRIN_HUMAN	O00468	A_23_P343411	-0.268975	12.5707	-3.12149	0.00662733	0.30394	1
ENSG00000105856	HBP1	HBP1_HUMAN	O60381	A_23_P215787	0.318078	9.75211	3.11963	0.00665313	0.30394	1
ENSG00000125827	TMX4	TMX4_HUMAN	Q9H1E5	A_24_P942517	0.289511	10.431	3.11817	0.00667356	0.30394	1
ENSG00000133106	EPSTI1	ESIP1_HUMAN	Q96J88	A_23_P105794	0.305443	9.01509	3.11707	0.00668881	0.30394	1
ENSG00000168234	TTC39C	TT39C_HUMAN	Q8N584	A_23_P401098	-0.248197	8.69076	-3.11599	0.00670394	0.30394	1
ENSG00000128408	RIBC2	RIBC2_HUMAN	Q9H4K1	A_23_P166526	0.235924	8.13513	3.11502	0.00671765	0.30394	1
ENSG00000172590	MRPL52	RM52_HUMAN	Q86TS9	A_24_P57730	0.192757	10.7413	3.1149	0.00671921	0.30394	1
ENSG00000168610	STAT3	STAT3_HUMAN	P40763	A_23_P107206	-0.227358	8.25457	-3.11487	0.00671974	0.30394	1
ENSG00000198113	TOR4A	TOR4A_HUMAN	Q9NXH8	A_23_P147106	-0.350927	10.7598	-3.11465	0.00672276	0.30394	1
ENSG00000121281	ADCY7	ADCY7_HUMAN	P51828	A_24_P416177	0.257983	8.48064	3.11456	0.00672403	0.30394	1
ENSG00000058091	CDK14	CDK14_HUMAN	O94921	A_23_P145889	-0.367028	8.97831	-3.11455	0.00672424	0.30394	1
ENSG00000197210	-	-	-	A_23_P91636	-0.276929	6.94164	-3.1136	0.00673754	0.30394	1
ENSG00000161103	-	-	-	A_23_P91636	-0.276929	6.94164	-3.1136	0.00673754	0.30394	1
ENSG00000128262	-	-	-	A_23_P91636	-0.276929	6.94164	-3.1136	0.00673754	0.30394	1
ENSG00000125798	FOXA2	FOXA2_HUMAN	Q9Y261	A_23_P500936	0.285499	12.9959	3.11336	0.00674091	0.30394	1
ENSG00000178921	PFAS	PUR4_HUMAN	O15067	A_23_P402610	-0.217175	9.69613	-3.11329	0.00674194	0.30394	1
ENSG00000144566	RAB5A	RAB5A_HUMAN	P20339	A_24_P208809	-0.203078	9.25206	-3.1132	0.00674323	0.30394	1
ENSG00000131951	LRRC9	LRRC9_HUMAN	Q6ZRR7	A_23_P3054	-0.218923	7.14358	-3.11277	0.0067492	0.30394	1
ENSG00000171617	ENC1	ENC1_HUMAN	O14682	A_24_P69095	0.34541	10.0427	3.11223	0.0067568	0.30394	1
ENSG00000165617	DACT1	DACT1_HUMAN	Q9NYF0	A_24_P284093	-0.297406	7.45657	-3.11199	0.00676031	0.30394	1
ENSG00000075239	ACAT1	THIL_HUMAN	P24752	A_24_P203678	-0.225902	9.03011	-3.11109	0.00677293	0.304175	1
ENSG00000136720	HS6ST1	H6ST1_HUMAN	O60243	A_24_P8220	0.198398	12.4028	3.11001	0.0067882	0.304528	1
ENSG00000146904	EPHA1	EPHA1_HUMAN	P21709	A_23_P157333	-0.24615	9.53351	-3.10737	0.00682587	0.305095	1
ENSG00000170465	KRT6C	K2C6C_HUMAN	P48668	A_23_P366936	0.257238	6.95505	3.10724	0.00682767	0.305095	1
ENSG00000250461	-	-	-	A_24_P158065	-0.227973	11.2159	-3.10686	0.00683312	0.305095	1
ENSG00000234545	FAM133B	F133B_HUMAN	Q5BKY9	A_24_P158065	-0.227973	11.2159	-3.10686	0.00683312	0.305095	1
ENSG00000205250	E2F4	E2F4_HUMAN	Q16254	A_23_P152218	-0.256811	9.60737	-3.10652	0.00683797	0.305095	1
ENSG00000175029	CTBP2	CTBP2_HUMAN	P56545	A_24_P103922	-0.389428	11.0326	-3.1052	0.00685675	0.305601	1
ENSG00000120306	CYSTM1	CYTM1_HUMAN	Q9H1C7	A_23_P259506	0.22641	11.9638	3.10451	0.00686663	0.30571	1
ENSG00000033867	SLC4A7	S4A7_HUMAN	Q9Y6M7	A_24_P362931	-0.282501	9.37969	-3.10255	0.00689494	0.306268	1
ENSG00000108352	RAPGEFL1	RPGFL_HUMAN	Q9UHV5	A_23_P152970	-0.209733	7.48973	-3.10225	0.00689915	0.306268	1
ENSG00000221923	ZNF880	ZN880_HUMAN	Q6PDB4	A_24_P926783	0.220124	8.12647	3.10074	0.00692093	0.306268	1
ENSG00000109270	LAMTOR3	LTOR3_HUMAN	Q9UHA4	A_23_P110362	0.331453	9.66392	3.10019	0.00692889	0.306268	1
ENSG00000002745	WNT16	WNT16_HUMAN	Q9UBV4	A_23_P134601	-0.300805	6.92913	-3.09959	0.00693766	0.306268	1
ENSG00000213023	SYT3	SYT3_HUMAN	Q9BQG1	A_23_P55917	-0.250048	9.39476	-3.09882	0.00694882	0.306268	1
ENSG00000267890	-	-	-	A_23_P55917	-0.250048	9.39476	-3.09882	0.00694882	0.306268	1
ENSG00000111837	MAK	MAK_HUMAN	P20794	A_24_P363278	-0.242443	7.1011	-3.09817	0.00695826	0.306268	1
ENSG00000268034	-	-	-	A_32_P162338	-0.242774	12.9433	-3.09746	0.00696849	0.306268	1
ENSG00000143549	TPM3	TPM3_HUMAN	P06753	A_32_P162338	-0.242774	12.9433	-3.09746	0.00696849	0.306268	1
ENSG00000257770	GPX5	GPX5_HUMAN	O75715	A_23_P214544	0.218771	7.36029	3.09732	0.00697059	0.306268	1
ENSG00000224586	GPX5	GPX5_HUMAN	O75715	A_23_P214544	0.218771	7.36029	3.09732	0.00697059	0.306268	1
ENSG00000146592	CREB5	CREB5_HUMAN	Q02930	A_23_P157117	-0.316989	7.91583	-3.09719	0.00697247	0.306268	1
ENSG00000115138	POMC	COLI_HUMAN	P01189	A_23_P5875	0.254667	11.5788	3.09694	0.00697606	0.306268	1
ENSG00000144040	SFXN5	SFXN5_HUMAN	Q8TD22	A_23_P108819	-0.276873	7.32259	-3.09478	0.00700771	0.306793	1
ENSG00000122786	CALD1	CALD1_HUMAN	Q05682	A_23_P42575	-0.484056	11.5182	-3.09437	0.00701366	0.306793	1
ENSG00000232445	-	-	-	A_24_P928765	-0.350513	9.25064	-3.09359	0.00702515	0.306793	1
ENSG00000271601	LIX1L	LIX1L_HUMAN	Q8IVB5	A_24_P687594	0.276281	9.65282	3.09285	0.00703593	0.306793	1
ENSG00000174871	CNIH2	CNIH2_HUMAN	Q6PI25	A_24_P203315	-0.236886	7.46921	-3.09248	0.00704133	0.306793	1
ENSG00000151892	GFRA1	GFRA1_HUMAN	P56159	A_23_P12686	0.226939	8.11702	3.09183	0.00705101	0.306793	1
ENSG00000141946	ZIM3	ZIM3_HUMAN	Q96PE6	A_23_P67103	-0.255891	7.04434	-3.09158	0.00705467	0.306793	1
ENSG00000186907	RTN4RL2	R4RL2_HUMAN	Q86UN3	A_23_P139104	-0.257914	9.76327	-3.09154	0.0070552	0.306793	1
ENSG00000158423	RIBC1	RIBC1_HUMAN	Q8N443	A_23_P73667	0.231779	9.40769	3.08914	0.00709067	0.306953	1
ENSG00000249715	FER1L5	FR1L5_HUMAN	A0AVI2	A_32_P366349	-0.314151	6.94275	-3.08912	0.00709098	0.306953	1
ENSG00000110002	VWA5A	VMA5A_HUMAN	O00534	A_23_P98455	0.288857	10.3731	3.08863	0.00709823	0.306953	1
ENSG00000179542	-	-	-	A_32_P158892	-0.203766	7.24504	-3.08776	0.00711116	0.306953	1
ENSG00000184481	FOXO4	FOXO4_HUMAN	P98177	A_24_P379165	-0.248253	8.29957	-3.08653	0.00712945	0.307419	1
ENSG00000152128	TMEM163	TM163_HUMAN	Q8TC26	A_23_P39550	0.227946	7.01868	3.0859	0.00713873	0.307497	1
ENSG00000136240	KDELR2	ERD22_HUMAN	P33947	A_24_P42517	0.244395	11.9169	3.08425	0.00716339	0.3076	1
ENSG00000089053	ANAPC5	APC5_HUMAN	Q9UJX4	A_23_P377830	-0.254761	10.8496	-3.08259	0.00718831	0.3076	1
ENSG00000116039	ATP6V1B1	VATB1_HUMAN	P15313	A_23_P142815	0.205322	7.08704	3.08249	0.00718975	0.3076	1
ENSG00000053438	NNAT	NNAT_HUMAN	Q16517	A_24_P382533	-0.255264	10.8628	-3.08184	0.00719958	0.3076	1
ENSG00000141543	EIF4A3	IF4A3_HUMAN	P38919	A_23_P141636	0.23506	14.5593	3.08176	0.00720077	0.3076	1
ENSG00000179967	-	-	-	A_24_P417984	-0.209076	15.1146	-3.08019	0.00722431	0.3076	1
ENSG00000173457	PPP1R14B	PP14B_HUMAN	Q96C90	A_24_P417984	-0.209076	15.1146	-3.08019	0.00722431	0.3076	1
ENSG00000167740	CYB5D2	NEUFC_HUMAN	Q8WUJ1	A_23_P341392	0.241844	10.0183	3.07993	0.00722833	0.3076	1
ENSG00000177731	FLII	FLII_HUMAN	Q13045	A_23_P4425	-0.240921	12.3655	-3.07871	0.00724672	0.3076	1
ENSG00000256628	-	-	-	A_32_P33561	0.188845	7.83167	3.0776	0.00726349	0.3076	1
ENSG00000174607	UGT8	CGT_HUMAN	Q16880	A_24_P103264	-0.25438	7.8623	-3.07682	0.00727535	0.3076	1
ENSG00000119125	GDA	GUAD_HUMAN	Q9Y2T3	A_24_P393571	-0.262264	7.2054	-3.07668	0.00727752	0.3076	1
ENSG00000057252	SOAT1	SOAT1_HUMAN	P35610	A_24_P216654	0.282246	9.05857	3.07664	0.00727802	0.3076	1
ENSG00000114315	HES1	HES1_HUMAN	Q14469	A_23_P6596	-0.242202	7.42601	-3.07623	0.00728425	0.3076	1
ENSG00000101049	SGK2	SGK2_HUMAN	Q9HBY8	A_23_P131801	0.232944	7.02678	3.07586	0.00728987	0.3076	1
ENSG00000135632	SMYD5	SMYD5_HUMAN	Q6GMV2	A_23_P91015	-0.223412	9.94245	-3.07548	0.00729566	0.3076	1
ENSG00000237212	-	-	-	A_23_P426528	0.24083	6.95505	3.07495	0.0073037	0.3076	1
ENSG00000099290	FAM21A	FA21A_HUMAN	Q641Q2	A_24_P677639	-0.293746	7.50479	-3.07434	0.00731314	0.3076	1
ENSG00000237840	-	-	-	A_24_P677639	-0.293746	7.50479	-3.07434	0.00731314	0.3076	1
ENSG00000172661	FAM21C	FA21C_HUMAN	Q9Y4E1	A_24_P677639	-0.293746	7.50479	-3.07434	0.00731314	0.3076	1
ENSG00000235618	-	-	-	A_24_P677639	-0.293746	7.50479	-3.07434	0.00731314	0.3076	1
ENSG00000159131	GART	PUR2_HUMAN	P22102	A_24_P239140	-0.282434	8.84151	-3.0738	0.00732137	0.3076	1
ENSG00000100241	SBF1	MTMR5_HUMAN	O95248	A_23_P109606	-0.248647	10.3567	-3.07229	0.00734437	0.3076	1
ENSG00000169762	TAPT1	TAPT1_HUMAN	Q6NXT6	A_24_P191750	0.198333	7.591	3.07211	0.00734723	0.3076	1
ENSG00000135413	LACRT	LACRT_HUMAN	Q9GZZ8	A_23_P64825	0.248714	7.08683	3.0721	0.00734728	0.3076	1
ENSG00000197472	ZNF695	ZN695_HUMAN	Q8IW36	A_23_P35316	0.242891	7.44344	3.07133	0.00735916	0.3076	1
ENSG00000169083	AR	ANDR_HUMAN	P10275	A_23_P113111	-0.302063	8.25514	-3.07092	0.00736541	0.3076	1
ENSG00000166013	-	-	-	A_24_P16353	-0.203398	6.99448	-3.07053	0.0073715	0.3076	1
ENSG00000225581	-	-	-	A_24_P16353	-0.203398	6.99448	-3.07053	0.0073715	0.3076	1
ENSG00000046651	OFD1	OFD1_HUMAN	O75665	A_24_P134653	0.235533	10.139	3.06964	0.00738508	0.3076	1
ENSG00000180304	OAZ2	OAZ2_HUMAN	O95190	A_23_P106463	-0.250737	12.4564	-3.06827	0.0074062	0.3076	1
ENSG00000153832	FBXO36	FBX36_HUMAN	Q8NEA4	A_23_P422981	0.284949	8.80382	3.06801	0.00741024	0.3076	1
ENSG00000142615	CELA2A	CEL2A_HUMAN	P08217	A_23_P46238	0.21718	7.17737	3.0673	0.00742132	0.3076	1
ENSG00000215704	CELA2B	CEL2B_HUMAN	P08218	A_23_P46238	0.21718	7.17737	3.0673	0.00742132	0.3076	1
ENSG00000080822	CLDND1	CLDN1_HUMAN	Q9NY35	A_23_P155556	0.241334	12.2648	3.06713	0.00742393	0.3076	1
ENSG00000165527	ARF6	ARF6_HUMAN	P62330	A_23_P48691	-0.280019	9.63426	-3.06654	0.00743309	0.3076	1
ENSG00000214960	ISPD	ISPD_HUMAN	A4D126	A_24_P833129	0.256972	7.05062	3.06636	0.00743586	0.3076	1
ENSG00000066135	KDM4A	KDM4A_HUMAN	O75164	A_23_P74446	-0.300323	10.9503	-3.06579	0.00744473	0.3076	1
ENSG00000143321	HDGF	HDGF_HUMAN	P51858	A_24_P376707	-0.248694	13.224	-3.06509	0.00745552	0.3076	1
ENSG00000241978	AKAP2	AKAP2_HUMAN	Q9Y2D5	A_23_P359043	-0.261942	7.48935	-3.06471	0.00746148	0.3076	1
ENSG00000157654	PALM2-AKAP2	-	-	A_23_P359043	-0.261942	7.48935	-3.06471	0.00746148	0.3076	1
ENSG00000143013	LMO4	LMO4_HUMAN	P61968	A_23_P380181	-0.296923	11.1259	-3.06408	0.00747128	0.3076	1
ENSG00000113580	NR3C1	GCR_HUMAN	P04150	A_23_P214059	0.21219	9.58528	3.06348	0.00748062	0.3076	1
ENSG00000135373	EHF	EHF_HUMAN	Q9NZC4	A_23_P203540	-0.295737	6.89702	-3.06342	0.00748149	0.3076	1
ENSG00000038002	AGA	ASPG_HUMAN	P20933	A_23_P7099	0.221033	10.1103	3.06316	0.00748561	0.3076	1
ENSG00000225826	-	-	-	A_23_P74330	0.210664	7.91151	3.06279	0.00749141	0.3076	1
ENSG00000150510	FAM124A	F124A_HUMAN	Q86V42	A_23_P344568	0.226271	10.1587	3.06194	0.00750469	0.3076	1
ENSG00000115694	STK25	STK25_HUMAN	O00506	A_24_P276983	-0.273879	11.317	-3.06124	0.00751564	0.3076	1
ENSG00000131653	TRAF7	TRAF7_HUMAN	Q6Q0C0	A_23_P206474	-0.221918	9.44589	-3.06078	0.0075228	0.3076	1
ENSG00000254692	TM9SF1	-	-	A_24_P142024	0.200835	11.7317	3.06071	0.00752403	0.3076	1
ENSG00000260669	-	-	-	A_24_P142024	0.200835	11.7317	3.06071	0.00752403	0.3076	1
ENSG00000254505	CHMP4A	CHM4A_HUMAN	Q9BY43	A_24_P142024	0.200835	11.7317	3.06071	0.00752403	0.3076	1
ENSG00000080224	EPHA6	EPHA6_HUMAN	Q9UF33	A_23_P18342	-0.212092	6.70961	-3.06049	0.00752743	0.3076	1
ENSG00000162188	GNG3	GBG3_HUMAN	P63215	A_23_P139192	-0.267898	7.71468	-3.06006	0.00753413	0.3076	1
ENSG00000143107	FNDC7	FNDC7_HUMAN	Q5VTL7	A_24_P268323	0.207192	6.9307	3.05997	0.00753561	0.3076	1
ENSG00000125414	MYH2	MYH2_HUMAN	Q9UKX2	A_23_P38271	-0.446152	9.12846	-3.05939	0.00754469	0.3076	1
ENSG00000151617	EDNRA	EDNRA_HUMAN	P25101	A_24_P217572	0.338843	10.3187	3.05764	0.00757235	0.3076	1
ENSG00000170917	NUDT6	NUDT6_HUMAN	P53370	A_23_P155857	0.229285	8.46345	3.05646	0.00759091	0.3076	1
ENSG00000174231	PRPF8	PRP8_HUMAN	Q6P2Q9	A_23_P38219	-0.322349	12.4315	-3.05639	0.00759197	0.3076	1
ENSG00000075340	ADD2	ADDB_HUMAN	P35612	A_32_P86533	-0.394925	9.12898	-3.05427	0.00762566	0.3076	1
ENSG00000115677	HDLBP	VIGLN_HUMAN	Q00341	A_23_P131417	-0.367918	12.7032	-3.05419	0.00762697	0.3076	1
ENSG00000154310	TNIK	-	-	A_24_P350576	-0.374053	8.13999	-3.05361	0.00763613	0.3076	1
ENSG00000204666	-	-	-	A_32_P215100	-0.254366	7.0429	-3.05321	0.00764254	0.3076	1
ENSG00000183386	FHL3	FHL3_HUMAN	Q13643	A_23_P114839	-0.297567	9.81833	-3.05292	0.0076472	0.3076	1
ENSG00000117600	LPPR4	-	-	A_32_P148538	-0.374337	7.83391	-3.05263	0.00765171	0.3076	1
ENSG00000110092	CCND1	CCND1_HUMAN	P24385	A_24_P124550	-0.302708	8.34674	-3.05107	0.00767676	0.3076	1
ENSG00000008226	DLEC1	DLEC1_HUMAN	Q9Y238	A_23_P18282	0.268382	8.6228	3.05097	0.00767832	0.3076	1
ENSG00000121957	GPSM2	GPSM2_HUMAN	P81274	A_23_P63402	0.325885	10.4328	3.05058	0.00768462	0.3076	1
ENSG00000157557	ETS2	ETS2_HUMAN	P15036	A_24_P382661	-0.267034	10.2709	-3.05051	0.00768561	0.3076	1
ENSG00000198483	ANKRD35	ANR35_HUMAN	Q8N283	A_23_P325690	-0.279168	9.74903	-3.05032	0.00768876	0.3076	1
ENSG00000168610	STAT3	STAT3_HUMAN	P40763	A_24_P116805	-0.194592	8.05919	-3.04907	0.00770876	0.3076	1
ENSG00000153147	SMARCA5	SMCA5_HUMAN	O60264	A_23_P406591	0.263014	7.12202	3.04904	0.00770923	0.3076	1
ENSG00000236296	-	-	-	A_23_P406591	0.263014	7.12202	3.04904	0.00770923	0.3076	1
ENSG00000196230	TUBB	TBB5_HUMAN	P07437	A_23_P387057	-0.220948	13.3066	-3.04901	0.00770967	0.3076	1
ENSG00000105866	SP4	SP4_HUMAN	Q02446	A_23_P71064	-0.200813	7.63771	-3.04878	0.00771347	0.3076	1
ENSG00000185668	POU3F1	PO3F1_HUMAN	Q03052	A_23_P97034	-0.217154	7.11458	-3.04846	0.00771861	0.3076	1
ENSG00000171174	RBKS	RBSK_HUMAN	Q9H477	A_23_P9523	0.248708	10.0712	3.04837	0.00771998	0.3076	1
ENSG00000116128	BCL9	BCL9_HUMAN	O00512	A_23_P382602	-0.324836	9.26621	-3.04772	0.00773054	0.3076	1
ENSG00000142864	SERBP1	PAIRB_HUMAN	Q8NC51	A_32_P187599	-0.269942	13.8821	-3.04751	0.00773387	0.3076	1
ENSG00000249565	-	-	-	A_32_P187599	-0.269942	13.8821	-3.04751	0.00773387	0.3076	1
ENSG00000224309	-	-	-	A_23_P321496	0.204545	7.14938	3.04719	0.00773903	0.3076	1
ENSG00000115306	SPTBN1	SPTB2_HUMAN	Q01082	A_23_P102523	-0.238457	9.16976	-3.04623	0.0077546	0.3076	1
ENSG00000145685	LHFPL2	LHPL2_HUMAN	Q6ZUX7	A_23_P255104	0.283546	12.87	3.04527	0.00777001	0.3076	1
ENSG00000178726	THBD	TRBM_HUMAN	P07204	A_23_P91390	0.253315	8.60478	3.04504	0.00777381	0.3076	1
ENSG00000084754	HADHA	ECHA_HUMAN	P40939	A_24_P353964	-0.261915	8.89806	-3.04479	0.00777785	0.3076	1
ENSG00000055044	NOP58	NOP58_HUMAN	Q9Y2X3	A_23_P154447	-0.258194	13.3131	-3.04476	0.00777832	0.3076	1
ENSG00000267631	CGB1	CGB1_HUMAN	A6NKQ9	A_23_P39095	0.227055	7.33255	3.04391	0.00779211	0.3076	1
ENSG00000267335	CGB1	-	-	A_23_P39095	0.227055	7.33255	3.04391	0.00779211	0.3076	1
ENSG00000147601	TERF1	TERF1_HUMAN	P54274	A_23_P216149	-0.307555	13.7612	-3.0427	0.00781172	0.3076	1
ENSG00000173231	-	-	-	A_23_P216149	-0.307555	13.7612	-3.0427	0.00781172	0.3076	1
ENSG00000187589	-	-	-	A_23_P216149	-0.307555	13.7612	-3.0427	0.00781172	0.3076	1
ENSG00000179409	GEMIN4	GEMI4_HUMAN	P57678	A_23_P66872	-0.207896	11.316	-3.04132	0.00783434	0.3076	1
ENSG00000116120	FARSB	SYFB_HUMAN	Q9NSD9	A_23_P165346	-0.247684	12.7453	-3.04118	0.00783659	0.3076	1
ENSG00000134779	TPGS2	TPGS2_HUMAN	Q68CL5	A_24_P128140	-0.259936	11.0607	-3.04067	0.00784483	0.3076	1
ENSG00000075188	NUP37	NUP37_HUMAN	Q8NFH4	A_23_P48099	0.231372	12.2937	3.03942	0.00786536	0.3076	1
ENSG00000258949	-	-	-	A_32_P14457	0.233381	7.0919	3.03925	0.00786816	0.3076	1
ENSG00000140931	CMTM3	CKLF3_HUMAN	Q96MX0	A_23_P88865	0.220003	14.4612	3.03893	0.00787337	0.3076	1
ENSG00000225031	-	-	-	A_32_P34186	-0.278558	12.3242	-3.03785	0.00789106	0.3076	1
ENSG00000063046	EIF4B	IF4B_HUMAN	P23588	A_32_P34186	-0.278558	12.3242	-3.03785	0.00789106	0.3076	1
ENSG00000107742	SPOCK2	TICN2_HUMAN	Q92563	A_23_P161280	-0.279015	9.19139	-3.03744	0.00789787	0.3076	1
ENSG00000075568	TMEM131	TM131_HUMAN	Q92545	A_23_P368558	0.421589	10.7603	3.03737	0.00789898	0.3076	1
ENSG00000070718	AP3M2	AP3M2_HUMAN	P53677	A_24_P64039	0.228388	9.09406	3.03736	0.00789925	0.3076	1
ENSG00000167766	ZNF83	ZNF83_HUMAN	P51522	A_23_P89145	0.246341	8.45233	3.03601	0.00792137	0.3076	1
ENSG00000154310	TNIK	-	-	A_23_P135568	-0.474343	9.5304	-3.03568	0.00792682	0.3076	1
ENSG00000105255	FSD1	FSD1_HUMAN	Q9BTV5	A_23_P153651	-0.222671	10.0679	-3.03561	0.00792801	0.3076	1
ENSG00000166763	-	-	-	A_23_P163238	-0.272333	7.0499	-3.03561	0.00792807	0.3076	1
ENSG00000242866	STRC	STRC_HUMAN	Q7RTU9	A_23_P163238	-0.272333	7.0499	-3.03561	0.00792807	0.3076	1
ENSG00000142657	PGD	6PGD_HUMAN	P52209	A_23_P126623	-0.319961	12.411	-3.03551	0.00792961	0.3076	1
ENSG00000116675	DNAJC6	AUXI_HUMAN	O75061	A_23_P95359	-0.19366	7.78921	-3.03502	0.00793782	0.3076	1
ENSG00000179833	SERTAD2	SRTD2_HUMAN	Q14140	A_24_P294124	0.227993	9.39504	3.03472	0.0079427	0.3076	1
ENSG00000148734	NPFFR1	NPFF1_HUMAN	Q9GZQ6	A_23_P1452	0.247176	7.11613	3.03441	0.0079479	0.3076	1
ENSG00000137574	TGS1	TGS1_HUMAN	Q96RS0	A_23_P60899	-0.192127	8.41061	-3.03386	0.00795707	0.3076	1
ENSG00000176907	C8orf4	CH004_HUMAN	Q9NR00	A_23_P253345	0.198595	7.28745	3.03363	0.00796078	0.3076	1
ENSG00000129354	AP1M2	AP1M2_HUMAN	Q9Y6Q5	A_23_P78543	-0.315786	10.9109	-3.03315	0.00796873	0.3076	1
ENSG00000264944	-	-	-	A_23_P201086	-0.234852	11.4465	-3.03185	0.00799035	0.3076	1
ENSG00000143761	ARF1	ARF1_HUMAN	P84077	A_23_P201086	-0.234852	11.4465	-3.03185	0.00799035	0.3076	1
ENSG00000198793	MTOR	MTOR_HUMAN	P42345	A_23_P34606	-0.220445	9.78318	-3.03065	0.00801038	0.3076	1
ENSG00000184905	TCEAL2	TCAL2_HUMAN	Q9H3H9	A_23_P85140	-0.264482	9.74566	-3.03061	0.00801105	0.3076	1
ENSG00000264247	-	-	-	A_24_P775249	0.265552	7.95139	3.02951	0.00802943	0.3076	1
ENSG00000233527	-	-	-	A_24_P839298	0.195055	7.74081	3.02941	0.00803113	0.3076	1
ENSG00000156515	HK1	HXK1_HUMAN	P19367	A_23_P217958	-0.306959	11.5589	-3.02865	0.00804378	0.3076	1
ENSG00000232645	-	-	-	A_24_P659393	0.201148	7.06141	3.0281	0.00805308	0.3076	1
ENSG00000123643	SLC36A1	S36A1_HUMAN	Q7Z2H8	A_23_P167640	-0.212188	7.22888	-3.02704	0.00807086	0.3076	1
ENSG00000133612	AGAP3	AGAP3_HUMAN	Q96P47	A_23_P111452	0.212501	12.2225	3.02701	0.00807133	0.3076	1
ENSG00000177425	PAWR	PAWR_HUMAN	Q96IZ0	A_23_P53663	-0.382156	11.5626	-3.02699	0.00807159	0.3076	1
ENSG00000087053	MTMR2	MTMR2_HUMAN	Q13614	A_24_P406830	0.221304	10.0991	3.02649	0.00808002	0.3076	1
ENSG00000256797	KLRF2	KLRF2_HUMAN	D3W0D1	A_24_P824642	0.225346	6.82589	3.02573	0.0080929	0.3076	1
ENSG00000137269	LRRC1	LRRC1_HUMAN	Q9BTT6	A_23_P377350	-0.229507	7.08715	-3.02544	0.00809782	0.3076	1
ENSG00000165799	RNASE7	RNAS7_HUMAN	Q9H1E1	A_23_P106080	0.297924	7.04053	3.02446	0.00811435	0.3076	1
ENSG00000114573	ATP6V1A	VATA_HUMAN	P38606	A_23_P211965	-0.227637	9.61963	-3.02404	0.00812131	0.3076	1
ENSG00000144366	GULP1	GULP1_HUMAN	Q9UBP9	A_23_P332399	-0.434487	10.9828	-3.024	0.00812202	0.3076	1
ENSG00000102007	PLP2	PLP2_HUMAN	Q04941	A_24_P74932	-0.224164	8.72564	-3.02378	0.00812578	0.3076	1
ENSG00000143450	OAZ3	OAZ3_HUMAN	Q9UMX2	A_32_P226078	0.212818	7.7982	3.02358	0.00812921	0.3076	1
ENSG00000113525	IL5	IL5_HUMAN	P05113	A_24_P209047	-0.233754	6.90047	-3.02106	0.00817187	0.308128	1
ENSG00000114999	TTL	TTL_HUMAN	Q8NG68	A_23_P361482	-0.193658	8.00247	-3.02088	0.00817506	0.308128	1
ENSG00000109107	ALDOC	ALDOC_HUMAN	P09972	A_23_P78108	-0.274421	9.39415	-3.01986	0.0081924	0.308128	1
ENSG00000104738	MCM4	MCM4_HUMAN	P33991	A_23_P370989	-0.227578	10.8759	-3.0189	0.00820881	0.308128	1
ENSG00000123307	NEUROD4	NDF4_HUMAN	Q9HD90	A_23_P87625	-0.228783	6.9927	-3.01876	0.00821115	0.308128	1
ENSG00000161270	NPHS1	NPHN_HUMAN	O60500	A_23_P5200	-0.20806	7.1989	-3.01828	0.00821936	0.308128	1
ENSG00000146416	AIG1	AIG1_HUMAN	Q9NVV5	A_24_P740692	-0.207275	7.16164	-3.01827	0.00821954	0.308128	1
ENSG00000096384	HSP90AB1	HS90B_HUMAN	P08238	A_23_P145089	-0.201548	14.2786	-3.01798	0.00822446	0.308128	1
ENSG00000183199	-	-	-	A_23_P145089	-0.201548	14.2786	-3.01798	0.00822446	0.308128	1
ENSG00000177469	PTRF	PTRF_HUMAN	Q6NZI2	A_23_P394064	-0.565055	12.063	-3.01782	0.00822721	0.308128	1
ENSG00000262090	-	-	-	A_32_P854438	0.296054	6.91998	3.01766	0.00822992	0.308128	1
ENSG00000261127	-	-	-	A_32_P854438	0.296054	6.91998	3.01766	0.00822992	0.308128	1
ENSG00000244067	GSTA2	GSTA2_HUMAN	P09210	A_24_P300394	0.266011	8.80201	3.01651	0.00824966	0.308128	1
ENSG00000232301	-	-	-	A_32_P211752	-0.500031	12.6837	-3.01636	0.00825231	0.308128	1
ENSG00000149679	CABLES2	CABL2_HUMAN	Q9BTV7	A_32_P175321	0.262744	10.6904	3.01585	0.00826106	0.308128	1
ENSG00000273619	-	-	-	A_32_P175321	0.262744	10.6904	3.01585	0.00826106	0.308128	1
ENSG00000187954	CYHR1	CYHR1_HUMAN	Q6ZMK1	A_24_P89843	0.252723	10.3247	3.01493	0.00827692	0.308128	1
ENSG00000230314	-	-	-	A_32_P82204	0.308616	7.26079	3.01426	0.00828842	0.308128	1
ENSG00000015153	YAF2	YAF2_HUMAN	Q8IY57	A_23_P139825	0.264198	8.52088	3.01347	0.00830199	0.308128	1
ENSG00000187555	USP7	UBP7_HUMAN	Q93009	A_23_P49481	-0.21625	12.4081	-3.01289	0.00831217	0.308128	1
ENSG00000254087	LYN	LYN_HUMAN	P07948	A_23_P147431	-0.27574	10.07	-3.01255	0.00831804	0.308128	1
ENSG00000182263	FIGN	FIGN_HUMAN	Q5HY92	A_23_P165909	-0.256288	7.50975	-3.01225	0.0083231	0.308128	1
ENSG00000248608	-	-	-	A_24_P418744	-0.243846	10.8485	-3.01225	0.00832313	0.308128	1
ENSG00000167100	SAMD14	SAM14_HUMAN	Q8IZD0	A_23_P421843	0.213276	8.92743	3.01179	0.00833108	0.308145	1
ENSG00000121570	DPPA4	DPPA4_HUMAN	Q7L190	A_23_P380526	-0.282024	12.3192	-3.01041	0.00835509	0.308609	1
ENSG00000166123	GPT2	ALAT2_HUMAN	Q8TD30	A_24_P193648	-0.266149	10.4233	-3.00861	0.00838645	0.308609	1
ENSG00000124496	BCAR2	TREF1_HUMAN	Q96PN7	A_23_P59022	-0.262793	9.09745	-3.00856	0.00838737	0.308609	1
ENSG00000124496	TRERF1	TREF1_HUMAN	Q96PN7	A_23_P59022	-0.262793	9.09745	-3.00856	0.00838737	0.308609	1
ENSG00000176273	SLC35G1	S35G1_HUMAN	Q2M3R5	A_23_P390032	0.234773	7.56937	3.00778	0.00840098	0.308609	1
ENSG00000176273	TMEM20	S35G1_HUMAN	Q2M3R5	A_23_P390032	0.234773	7.56937	3.00778	0.00840098	0.308609	1
ENSG00000147400	CETN2	CETN2_HUMAN	P41208	A_23_P73493	0.205355	11.2212	3.00766	0.00840305	0.308609	1
ENSG00000115808	STRN	STRN_HUMAN	O43815	A_32_P78904	0.246253	8.48144	3.00762	0.0084037	0.308609	1
ENSG00000138641	HERC3	HERC3_HUMAN	Q15034	A_24_P153215	-0.306857	7.0048	-3.00719	0.00841129	0.308612	1
ENSG00000238269	PAGE2B	GGEE3_HUMAN	Q5JRK9	A_32_P109683	0.200228	7.23685	3.00628	0.00842722	0.30874	1
ENSG00000149926	FAM57B	FA57B_HUMAN	Q71RH2	A_23_P163711	-0.249728	9.75215	-3.00613	0.0084298	0.30874	1
ENSG00000224680	-	-	-	A_23_P30020	0.188737	10.7646	3.00522	0.00844576	0.309049	1
ENSG00000123739	PLA2G12A	PG12A_HUMAN	Q9BZM1	A_23_P30020	0.188737	10.7646	3.00522	0.00844576	0.309049	1
ENSG00000148925	BTBD10	BTBDA_HUMAN	Q9BSF8	A_23_P13438	0.231168	10.1334	3.00464	0.00845598	0.309052	1
ENSG00000117691	NENF	NENF_HUMAN	Q9UMX5	A_23_P137948	0.223741	12.0873	3.00383	0.00847035	0.309052	1
ENSG00000172421	EFCAB3	EFCB3_HUMAN	Q8N7B9	A_32_P515971	-0.185233	7.05678	-3.00365	0.00847351	0.309052	1
ENSG00000196581	AJAP1	AJAP1_HUMAN	Q9UKB5	A_24_P604989	0.218813	7.65314	2.9995	0.00854694	0.310848	1
ENSG00000150760	DOCK1	DOCK1_HUMAN	Q14185	A_23_P45059	0.243331	10.5326	2.99872	0.00856083	0.311044	1
ENSG00000111237	VPS29	VPS29_HUMAN	Q9UBQ0	A_24_P175989	0.27199	11.4784	2.99795	0.00857458	0.311192	1
ENSG00000184640	40057	SEPT9_HUMAN	Q9UHD8	A_24_P147910	-0.247573	8.35769	-2.99764	0.00858005	0.311192	1
ENSG00000172167	MTBP	MTBP_HUMAN	Q96DY7	A_23_P357794	-0.176044	7.70745	-2.99702	0.00859103	0.311315	1
ENSG00000139438	FAM222A	F222A_HUMAN	Q5U5X8	A_23_P128375	0.229826	10.9444	2.99579	0.00861313	0.311624	1
ENSG00000254788	CKLF	-	-	A_23_P206396	0.246248	11.3809	2.9957	0.00861471	0.311624	1
ENSG00000254788	CKLF-CMTM1	-	-	A_23_P206396	0.246248	11.3809	2.9957	0.00861471	0.311624	1
ENSG00000217555	CKLF	-	-	A_23_P206396	0.246248	11.3809	2.9957	0.00861471	0.311624	1
ENSG00000153339	TRAPPC8	TPPC8_HUMAN	Q9Y2L5	A_23_P107552	0.21917	11.1387	2.9935	0.0086542	0.312221	1
ENSG00000230067	-	-	-	A_32_P514599	-0.359493	11.9745	-2.99266	0.00866925	0.312221	1
ENSG00000164118	CEP44	CEP44_HUMAN	Q9C0F1	A_23_P385911	0.234348	8.5079	2.99177	0.00868537	0.312221	1
ENSG00000196754	S100A2	S10A2_HUMAN	P29034	A_23_P201706	0.224021	8.58256	2.99161	0.00868835	0.312221	1
ENSG00000118640	VAMP8	VAMP8_HUMAN	Q9BV40	A_23_P28434	0.20937	15.3644	2.9913	0.00869393	0.312221	1
ENSG00000130816	DNMT1	DNMT1_HUMAN	P26358	A_24_P408083	-0.222282	10.0702	-2.98985	0.00872011	0.312221	1
ENSG00000167104	BPIFB6	BPIB6_HUMAN	Q8NFQ5	A_32_P539109	-0.248849	6.93701	-2.98883	0.00873861	0.312221	1
ENSG00000145692	BHMT	BHMT1_HUMAN	Q93088	A_24_P257511	-0.225	7.05148	-2.98875	0.00874002	0.312221	1
ENSG00000196459	TRAPPC2	TPC2A_HUMAN	P0DI81	A_23_P73660	0.202155	9.01123	2.98684	0.00877484	0.312221	1
ENSG00000279284	-	-	-	A_32_P7611	-0.254058	6.92969	-2.98624	0.00878575	0.312221	1
ENSG00000107593	PKD2L1	PK2L1_HUMAN	Q9P0L9	A_23_P12554	-0.231009	6.96363	-2.98543	0.00880064	0.312221	1
ENSG00000124496	BCAR2	TREF1_HUMAN	Q96PN7	A_24_P217904	-0.197288	7.23033	-2.98532	0.00880264	0.312221	1
ENSG00000124496	TRERF1	TREF1_HUMAN	Q96PN7	A_24_P217904	-0.197288	7.23033	-2.98532	0.00880264	0.312221	1
ENSG00000111700	SLCO1B3	SO1B3_HUMAN	Q9NPD5	A_23_P105475	0.206774	6.97053	2.9852	0.00880482	0.312221	1
ENSG00000279484	-	-	-	A_24_P941006	0.21387	6.89682	2.98511	0.00880643	0.312221	1
ENSG00000100592	DAAM1	DAAM1_HUMAN	Q9Y4D1	A_24_P347447	0.27868	11.574	2.98509	0.00880676	0.312221	1
ENSG00000152219	ARL14EP	AL14E_HUMAN	Q8N8R7	A_23_P345778	0.205247	7.51209	2.98485	0.0088112	0.312221	1
ENSG00000261377	-	-	-	A_32_P132748	-0.25067	9.78344	-2.98475	0.00881304	0.312221	1
ENSG00000247732	-	-	-	A_32_P132748	-0.25067	9.78344	-2.98475	0.00881304	0.312221	1
ENSG00000274253	-	-	-	A_32_P132748	-0.25067	9.78344	-2.98475	0.00881304	0.312221	1
ENSG00000144366	GULP1	GULP1_HUMAN	Q9UBP9	A_32_P153388	-0.238825	7.93351	-2.98437	0.00882001	0.312221	1
ENSG00000173456	RNF26	RNF26_HUMAN	Q9BY78	A_23_P64630	-0.207383	12.6406	-2.98434	0.00882055	0.312221	1
ENSG00000158985	CDC42SE2	C42S2_HUMAN	Q9NRR3	A_24_P409042	0.216752	12.3639	2.98367	0.00883297	0.312221	1
ENSG00000164430	MB21D1	CGAS_HUMAN	Q8N884	A_32_P1173	-0.282226	8.0742	-2.98323	0.00884104	0.312221	1
ENSG00000175505	CLCF1	CLCF1_HUMAN	Q9UBD9	A_23_P138760	0.194132	8.06964	2.98298	0.00884562	0.312221	1
ENSG00000279307	-	-	-	A_23_P360983	-0.323363	11.6468	-2.98281	0.0088487	0.312221	1
ENSG00000164182	NDUFAF2	MIMIT_HUMAN	Q8N183	A_23_P360983	-0.323363	11.6468	-2.98281	0.0088487	0.312221	1
ENSG00000184220	CMSS1	CMS1_HUMAN	Q9BQ75	A_23_P132874	-0.251655	12.7029	-2.98088	0.00888421	0.312221	1
ENSG00000242550	SERPINB10	SPB10_HUMAN	P48595	A_23_P313981	-0.223639	7.07189	-2.98071	0.00888739	0.312221	1
ENSG00000119522	DENND1A	DEN1A_HUMAN	Q8TEH3	A_32_P23854	0.186159	9.82385	2.98045	0.00889211	0.312221	1
ENSG00000125166	GOT2	AATM_HUMAN	P00505	A_23_P106575	-0.222363	11.9679	-2.98019	0.00889702	0.312221	1
ENSG00000113594	LIFR	LIFR_HUMAN	P42702	A_24_P397386	0.291725	9.87755	2.97975	0.00890508	0.312221	1
ENSG00000216895	-	-	-	A_32_P13417	0.21666	8.10674	2.97953	0.00890923	0.312221	1
ENSG00000169635	HIC2	HIC2_HUMAN	Q96JB3	A_23_P383132	0.228088	12.7939	2.97929	0.0089137	0.312221	1
ENSG00000162734	PEA15	PEA15_HUMAN	Q15121	A_24_P410952	-0.215804	9.97942	-2.97833	0.00893138	0.312221	1
ENSG00000157021	-	-	-	A_32_P176675	0.241555	9.21444	2.97825	0.00893297	0.312221	1
ENSG00000132938	MTUS2	MTUS2_HUMAN	Q5JR59	A_23_P334308	0.232467	8.19601	2.97804	0.0089368	0.312221	1
ENSG00000203706	-	-	-	A_32_P207169	-0.390498	8.5125	-2.9774	0.00894875	0.312221	1
ENSG00000182568	SATB1	SATB1_HUMAN	Q01826	A_23_P259741	-0.218428	9.78783	-2.97705	0.0089552	0.312221	1
ENSG00000178104	PDE4DIP	MYOME_HUMAN	Q5VU43	A_23_P200801	0.343724	9.04397	2.97678	0.00896035	0.312221	1
ENSG00000240912	-	-	-	A_23_P145238	0.22895	12.0667	2.97601	0.00897457	0.312221	1
ENSG00000058804	NDC1	NDC1_HUMAN	Q9BTX1	A_24_P222192	-0.309548	9.41377	-2.97596	0.00897561	0.312221	1
ENSG00000178035	IMPDH2	IMDH2_HUMAN	P12268	A_24_P166042	-0.209588	10.8262	-2.97571	0.00898019	0.312221	1
ENSG00000122641	INHBA	INHBA_HUMAN	P08476	A_23_P122924	-0.26212	7.57794	-2.97568	0.00898074	0.312221	1
ENSG00000170745	KCNS3	KCNS3_HUMAN	Q9BQ31	A_23_P120103	-0.253483	9.95779	-2.97313	0.00902841	0.313613	1
ENSG00000243910	-	-	-	A_23_P102109	-0.378404	10.4134	-2.97215	0.00904684	0.313847	1
ENSG00000007376	RPUSD1	RUSD1_HUMAN	Q9UJJ7	A_23_P49269	-0.200938	10.8028	-2.97196	0.00905042	0.313847	1
ENSG00000164418	GRIK2	GRIK2_HUMAN	Q13002	A_32_P115796	-0.273831	6.92992	-2.97093	0.00906975	0.314009	1
ENSG00000010165	METTL13	MET13_HUMAN	Q8N6R0	A_23_P201676	-0.21946	9.43911	-2.9709	0.00907036	0.314009	1
ENSG00000265241	RBM8A	RBM8A_HUMAN	Q9Y5S9	A_32_P62571	0.258508	11.2955	2.97035	0.0090808	0.314105	1
ENSG00000181652	ATG9B	ATG9B_HUMAN	Q674R7	A_32_P379379	-0.273754	7.13424	-2.96922	0.00910203	0.314575	1
ENSG00000135074	ADAM19	ADA19_HUMAN	Q9H013	A_23_P374082	0.223249	14.8236	2.96854	0.00911499	0.314758	1
ENSG00000223816	-	-	-	A_32_P148118	0.214748	7.20627	2.96644	0.00915484	0.314931	1
ENSG00000235235	-	-	-	A_32_P148118	0.214748	7.20627	2.96644	0.00915484	0.314931	1
ENSG00000187902	SHISA7	SHSA7_HUMAN	A6NL88	A_24_P161581	0.204428	8.02663	2.96555	0.00917179	0.314931	1
ENSG00000254999	BRK1	BRK1_HUMAN	Q8WUW1	A_23_P420361	-0.225999	14.9462	-2.96547	0.00917326	0.314931	1
ENSG00000255883	-	-	-	A_23_P171314	-0.255803	10.7594	-2.9651	0.00918031	0.314931	1
ENSG00000165775	FUNDC2	FUND2_HUMAN	Q9BWH2	A_23_P171314	-0.255803	10.7594	-2.9651	0.00918031	0.314931	1
ENSG00000141744	PNMT	PNMT_HUMAN	P11086	A_23_P100642	-0.25143	8.01438	-2.96507	0.00918093	0.314931	1
ENSG00000213402	PTPRCAP	PTCA_HUMAN	Q14761	A_23_P98173	0.203925	8.01151	2.96294	0.00922157	0.31585	1
ENSG00000172725	CORO1B	COR1B_HUMAN	Q9BR76	A_23_P98173	0.203925	8.01151	2.96294	0.00922157	0.31585	1
ENSG00000106077	ABHD11	ABHDB_HUMAN	Q8NFV4	A_23_P315933	0.339396	13.1179	2.96281	0.00922396	0.31585	1
ENSG00000105185	PDCD5	PDCD5_HUMAN	O14737	A_24_P339611	0.24259	12.9314	2.96244	0.00923115	0.31585	1
ENSG00000224537	-	-	-	A_24_P154868	0.247777	6.94018	2.96148	0.00924957	0.315881	1
ENSG00000112818	MEP1A	MEP1A_HUMAN	Q16819	A_24_P154868	0.247777	6.94018	2.96148	0.00924957	0.315881	1
ENSG00000135968	GCC2	GCC2_HUMAN	Q8IWJ2	A_23_P384085	0.287439	10.0283	2.96091	0.00926044	0.315881	1
ENSG00000184205	TSPYL2	TSYL2_HUMAN	Q9H2G4	A_23_P158485	0.254087	10.4509	2.96045	0.00926933	0.315881	1
ENSG00000143341	HMCN1	HMCN1_HUMAN	Q96RW7	A_23_P148990	-0.237621	7.97883	-2.95956	0.00928656	0.315881	1
ENSG00000247134	-	-	-	A_32_P121549	-0.230213	10.4468	-2.95921	0.00929335	0.315881	1
ENSG00000176029	C11orf16	CK016_HUMAN	Q9NQ32	A_23_P13486	0.268112	6.93548	2.95848	0.0093074	0.315881	1
ENSG00000261327	-	-	-	A_24_P282266	0.188757	7.0509	2.95842	0.0093086	0.315881	1
ENSG00000276116	-	-	-	A_23_P327156	0.260468	8.22409	2.95764	0.00932361	0.315881	1
ENSG00000170011	MYRIP	MYRIP_HUMAN	Q8NFW9	A_23_P326760	0.265551	8.40679	2.95721	0.00933201	0.315881	1
ENSG00000109270	LAMTOR3	LTOR3_HUMAN	Q9UHA4	A_32_P10311	0.226253	8.20017	2.95674	0.00934095	0.315881	1
ENSG00000114346	ECT2	ECT2_HUMAN	Q9H8V3	A_23_P9574	-0.20413	12.3091	-2.95661	0.00934354	0.315881	1
ENSG00000135269	TES	TES_HUMAN	Q9UGI8	A_23_P111672	-0.339239	8.77533	-2.95572	0.0093608	0.315881	1
ENSG00000160216	AGPAT3	PLCC_HUMAN	Q9NRZ7	A_24_P344711	0.201841	10.7396	2.95553	0.0093646	0.315881	1
ENSG00000124194	GDAP1L1	GD1L1_HUMAN	Q96MZ0	A_23_P17354	-0.285337	8.39104	-2.9555	0.00936501	0.315881	1
ENSG00000255073	ZFP91-CNTF	-	-	A_24_P56052	-0.214412	9.61257	-2.95464	0.00938183	0.315881	1
ENSG00000186660	ZFP91	ZFP91_HUMAN	Q96JP5	A_24_P56052	-0.214412	9.61257	-2.95464	0.00938183	0.315881	1
ENSG00000167654	ATCAY	ATCAY_HUMAN	Q86WG3	A_23_P433063	-0.225331	7.80961	-2.9545	0.0093845	0.315881	1
ENSG00000158714	SLAMF8	SLAF8_HUMAN	Q9P0V8	A_23_P200138	0.267794	7.0788	2.95298	0.00941419	0.315881	1
ENSG00000227057	WDR46	WDR46_HUMAN	O15213	A_24_P389038	-0.244735	9.50013	-2.95284	0.00941699	0.315881	1
ENSG00000121742	GJB6	CXB6_HUMAN	O95452	A_23_P2745	-0.303319	6.93217	-2.95283	0.00941713	0.315881	1
ENSG00000124588	NQO2	NQO2_HUMAN	P16083	A_23_P58953	-0.232339	11.7968	-2.95172	0.00943886	0.315881	1
ENSG00000181781	ODF3L2	OD3L2_HUMAN	Q3SX64	A_32_P337508	0.209043	7.49822	2.95158	0.0094415	0.315881	1
ENSG00000005022	SLC25A5	ADT2_HUMAN	P05141	A_24_P182182	-0.211617	14.6633	-2.95118	0.00944954	0.315881	1
ENSG00000235064	-	-	-	A_24_P182182	-0.211617	14.6633	-2.95118	0.00944954	0.315881	1
ENSG00000159202	UBE2Z	UBE2Z_HUMAN	Q9H832	A_24_P339305	-0.270774	9.31248	-2.95054	0.00946198	0.315881	1
ENSG00000184117	NIPSNAP1	NIPS1_HUMAN	Q9BPW8	A_24_P237278	-0.299082	10.1134	-2.9504	0.00946465	0.315881	1
ENSG00000178209	PLEC	PLEC_HUMAN	Q15149	A_24_P914759	-0.213631	7.14228	-2.95035	0.00946576	0.315881	1
ENSG00000175592	FOSL1	FOSL1_HUMAN	P15407	A_23_P161624	-0.257871	7.98009	-2.94878	0.00949659	0.315881	1
ENSG00000101843	PSMD10	PSD10_HUMAN	O75832	A_23_P258570	0.321039	10.8043	2.94853	0.00950151	0.315881	1
ENSG00000104472	CHRAC1	CHRC1_HUMAN	Q9NRG0	A_23_P123544	-0.245626	9.42358	-2.94819	0.00950835	0.315881	1
ENSG00000162063	CCNF	CCNF_HUMAN	P41002	A_23_P37954	-0.222042	9.54402	-2.94779	0.00951607	0.315881	1
ENSG00000231439	-	-	-	A_24_P289994	0.224583	7.13358	2.94756	0.0095207	0.315881	1
ENSG00000185203	-	-	-	A_24_P289994	0.224583	7.13358	2.94756	0.0095207	0.315881	1
ENSG00000198286	CARD11	CAR11_HUMAN	Q9BXL7	A_23_P82324	-0.361834	8.66122	-2.94736	0.00952473	0.315881	1
ENSG00000041880	PARP3	PARP3_HUMAN	Q9Y6F1	A_24_P402779	0.297919	7.30071	2.94704	0.00953089	0.315881	1
ENSG00000151849	CENPJ	CENPJ_HUMAN	Q9HC77	A_32_P219116	0.232838	11.0897	2.946	0.00955157	0.315881	1
ENSG00000177479	ARIH2	ARI2_HUMAN	O95376	A_23_P61881	-0.199467	12.1681	-2.94585	0.00955455	0.315881	1
ENSG00000177311	ZBTB38	ZBT38_HUMAN	Q8NAP3	A_23_P380076	0.222584	9.51348	2.94579	0.00955569	0.315881	1
ENSG00000115306	SPTBN1	SPTB2_HUMAN	Q01082	A_23_P339095	-0.2358	9.19169	-2.94544	0.00956261	0.315881	1
ENSG00000164244	PRRC1	PRRC1_HUMAN	Q96M27	A_23_P92948	-0.229262	10.6358	-2.94396	0.00959202	0.316544	1
ENSG00000243749	ZMYM6NB	ZMYNB_HUMAN	Q8NCS4	A_24_P370670	0.231319	11.5924	2.94366	0.00959808	0.316544	1
ENSG00000271741	-	-	-	A_24_P370670	0.231319	11.5924	2.94366	0.00959808	0.316544	1
ENSG00000244675	-	-	-	A_24_P170707	-0.230578	6.99778	-2.94231	0.00962486	0.316575	1
ENSG00000175567	UCP2	UCP2_HUMAN	P55851	A_23_P47704	-0.275179	11.7977	-2.94211	0.00962891	0.316575	1
ENSG00000105486	LIG1	DNLI1_HUMAN	P18858	A_23_P39116	-0.241374	11.9807	-2.94179	0.00963535	0.316575	1
ENSG00000189159	HN1	HN1_HUMAN	Q9UK76	A_23_P100632	-0.27234	16.3853	-2.94165	0.00963816	0.316575	1
ENSG00000169902	TPST1	TPST1_HUMAN	O60507	A_23_P145965	0.21287	11.8277	2.94117	0.00964776	0.316575	1
ENSG00000262228	-	-	-	A_24_P136379	0.220343	6.99525	2.94106	0.00965002	0.316575	1
ENSG00000176973	FAM89B	FA89B_HUMAN	Q8N5H3	A_23_P124962	0.236503	11.6079	2.94053	0.00966056	0.316575	1
ENSG00000173465	SSSCA1	SSA27_HUMAN	O60232	A_23_P124962	0.236503	11.6079	2.94053	0.00966056	0.316575	1
ENSG00000106617	PRKAG2	AAKG2_HUMAN	Q9UGJ0	A_24_P937029	0.263279	7.00365	2.94052	0.00966065	0.316575	1
ENSG00000108950	FAM20A	FA20A_HUMAN	Q96MK3	A_32_P108254	0.248577	11.7546	2.93984	0.00967434	0.3166	1
ENSG00000108950	FP2747	FA20A_HUMAN	Q96MK3	A_32_P108254	0.248577	11.7546	2.93984	0.00967434	0.3166	1
ENSG00000250786	-	-	-	A_24_P639671	0.242155	10.9081	2.93972	0.00967681	0.3166	1
ENSG00000173218	VANGL1	VANG1_HUMAN	Q8TAA9	A_23_P103795	0.268598	12.2119	2.93882	0.00969481	0.31681	1
ENSG00000137261	KIAA0319	K0319_HUMAN	Q5VV43	A_23_P168324	-0.19363	7.07622	-2.93863	0.00969866	0.31681	1
ENSG00000228095	-	-	-	A_24_P375358	0.32409	6.98142	2.93591	0.00975346	0.317819	1
ENSG00000090861	AARS	SYAC_HUMAN	P49588	A_24_P172990	-0.33259	10.9427	-2.93519	0.00976822	0.317819	1
ENSG00000132640	BTBD3	BTBD3_HUMAN	Q9Y2F9	A_24_P134356	0.292347	11.296	2.93432	0.00978568	0.318124	1
ENSG00000183978	COA3	COA3_HUMAN	Q9Y2R0	A_24_P356453	0.190272	12.3456	2.9336	0.0098003	0.318124	1
ENSG00000082074	FYB	FYB_HUMAN	O15117	A_24_P393740	0.333613	6.9348	2.93339	0.00980463	0.318124	1
ENSG00000171246	NPTX1	NPTX1_HUMAN	Q15818	A_24_P1949	0.200024	7.08821	2.9332	0.00980855	0.318124	1
ENSG00000172007	RAB33B	RB33B_HUMAN	Q9H082	A_24_P268917	0.198159	9.04321	2.93274	0.00981782	0.318173	1
ENSG00000140416	TPM1	TPM1_HUMAN	P09493	A_23_P206018	-0.319228	13.5485	-2.93132	0.00984672	0.318299	1
ENSG00000132031	MATN3	MATN3_HUMAN	O15232	A_23_P102058	0.296662	8.54998	2.93131	0.00984705	0.318299	1
ENSG00000185236	RAB11B	RB11B_HUMAN	Q15907	A_23_P67748	-0.266684	8.66207	-2.93104	0.00985258	0.318299	1
ENSG00000170858	-	-	-	A_23_P27781	0.207992	7.48292	2.93103	0.00985269	0.318299	1
ENSG00000266844	-	-	-	A_24_P694820	0.228139	7.20106	2.92879	0.0098985	0.318978	1
ENSG00000005893	LAMP2	LAMP2_HUMAN	P13473	A_23_P217447	0.178309	8.96733	2.92867	0.00990113	0.318978	1
ENSG00000179577	-	-	-	A_24_P152623	-0.230269	6.99995	-2.92849	0.00990474	0.318978	1
ENSG00000258691	-	-	-	A_24_P919850	0.21283	7.74587	2.92756	0.00992376	0.319066	1
ENSG00000100739	BDKRB1	BKRB1_HUMAN	P46663	A_24_P919850	0.21283	7.74587	2.92756	0.00992376	0.319066	1
ENSG00000125462	C1orf61	CROC4_HUMAN	Q13536	A_32_P138032	0.245514	9.05232	2.92717	0.0099319	0.319066	1
ENSG00000169432	SCN9A	SCN9A_HUMAN	Q15858	A_24_P792124	-0.321214	7.0447	-2.9271	0.00993327	0.319066	1
ENSG00000203724	C1orf53	CA053_HUMAN	Q5VUE5	A_32_P210572	0.197157	9.0945	2.92656	0.0099445	0.319066	1
ENSG00000257660	-	-	-	A_32_P121059	0.205939	7.8216	2.92623	0.00995123	0.319066	1
ENSG00000156026	MCU	MCU_HUMAN	Q8NE86	A_23_P346405	-0.194262	8.94078	-2.92577	0.00996075	0.319066	1
ENSG00000214140	PRCD	PRCD_HUMAN	Q00LT1	A_24_P517252	-0.249007	7.16815	-2.92572	0.00996184	0.319066	1
ENSG00000237524	-	-	-	A_32_P137783	-0.22648	6.87559	-2.92521	0.00997239	0.319155	1
ENSG00000188580	NKAIN2	NKAI2_HUMAN	Q5VXU1	A_23_P316501	0.21191	7.00164	2.92292	0.0100198	0.319627	1
ENSG00000152284	TCF7L1	TF7L1_HUMAN	Q9HCS4	A_23_P142872	-0.393482	12.1645	-2.92252	0.0100281	0.319627	1
ENSG00000128482	RNF112	RN112_HUMAN	Q9ULX5	A_23_P107116	0.238431	7.44426	2.92252	0.0100281	0.319627	1
ENSG00000167397	VKORC1	VKOR1_HUMAN	Q9BQB6	A_23_P100486	-0.183386	12.6284	-2.92221	0.0100345	0.319627	1
ENSG00000067715	SYT1	SYT1_HUMAN	P21579	A_23_P36795	-0.371712	9.02928	-2.92179	0.0100432	0.319627	1
ENSG00000224320	HLA-A	1A01_HUMAN	P30443	A_23_P408353	-0.223718	10.6244	-2.92172	0.0100446	0.319627	1
ENSG00000224320	HLA-A	1A24_HUMAN	P05534	A_23_P408353	-0.223718	10.6244	-2.92172	0.0100446	0.319627	1
ENSG00000224320	HLA-A	1A36_HUMAN	P30455	A_23_P408353	-0.223718	10.6244	-2.92172	0.0100446	0.319627	1
ENSG00000224320	HLA-A	1A80_HUMAN	Q09160	A_23_P408353	-0.223718	10.6244	-2.92172	0.0100446	0.319627	1
ENSG00000227715	HLA-A	1A02_HUMAN	P01892	A_23_P408353	-0.223718	10.6244	-2.92172	0.0100446	0.319627	1
ENSG00000206505	HLA-A	1A25_HUMAN	P18462	A_23_P408353	-0.223718	10.6244	-2.92172	0.0100446	0.319627	1
ENSG00000206505	HLA-A	1A26_HUMAN	P30450	A_23_P408353	-0.223718	10.6244	-2.92172	0.0100446	0.319627	1
ENSG00000206505	HLA-A	1A34_HUMAN	P30453	A_23_P408353	-0.223718	10.6244	-2.92172	0.0100446	0.319627	1
ENSG00000206505	HLA-A	1A43_HUMAN	P30456	A_23_P408353	-0.223718	10.6244	-2.92172	0.0100446	0.319627	1
ENSG00000206505	HLA-A	1A66_HUMAN	P30457	A_23_P408353	-0.223718	10.6244	-2.92172	0.0100446	0.319627	1
ENSG00000229215	HLA-A	1A01_HUMAN	P30443	A_23_P408353	-0.223718	10.6244	-2.92172	0.0100446	0.319627	1
ENSG00000229215	HLA-A	1A24_HUMAN	P05534	A_23_P408353	-0.223718	10.6244	-2.92172	0.0100446	0.319627	1
ENSG00000229215	HLA-A	1A36_HUMAN	P30455	A_23_P408353	-0.223718	10.6244	-2.92172	0.0100446	0.319627	1
ENSG00000229215	HLA-A	1A80_HUMAN	Q09160	A_23_P408353	-0.223718	10.6244	-2.92172	0.0100446	0.319627	1
ENSG00000206503	HLA-A	1A03_HUMAN	P04439	A_23_P408353	-0.223718	10.6244	-2.92172	0.0100446	0.319627	1
ENSG00000206503	HLA-A	1A11_HUMAN	P13746	A_23_P408353	-0.223718	10.6244	-2.92172	0.0100446	0.319627	1
ENSG00000206503	HLA-A	1A30_HUMAN	P16188	A_23_P408353	-0.223718	10.6244	-2.92172	0.0100446	0.319627	1
ENSG00000223980	HLA-A	1A23_HUMAN	P30447	A_23_P408353	-0.223718	10.6244	-2.92172	0.0100446	0.319627	1
ENSG00000223980	HLA-A	1A32_HUMAN	P10314	A_23_P408353	-0.223718	10.6244	-2.92172	0.0100446	0.319627	1
ENSG00000223980	HLA-A	1A74_HUMAN	P30459	A_23_P408353	-0.223718	10.6244	-2.92172	0.0100446	0.319627	1
ENSG00000235657	HLA-A	1A02_HUMAN	P01892	A_23_P408353	-0.223718	10.6244	-2.92172	0.0100446	0.319627	1
ENSG00000235657	HLA-A	1A68_HUMAN	P01891	A_23_P408353	-0.223718	10.6244	-2.92172	0.0100446	0.319627	1
ENSG00000235657	HLA-A	1A69_HUMAN	P10316	A_23_P408353	-0.223718	10.6244	-2.92172	0.0100446	0.319627	1
ENSG00000231834	HLA-A	1A29_HUMAN	P30512	A_23_P408353	-0.223718	10.6244	-2.92172	0.0100446	0.319627	1
ENSG00000231834	HLA-A	1A31_HUMAN	P16189	A_23_P408353	-0.223718	10.6244	-2.92172	0.0100446	0.319627	1
ENSG00000231834	HLA-A	1A33_HUMAN	P16190	A_23_P408353	-0.223718	10.6244	-2.92172	0.0100446	0.319627	1
ENSG00000096696	DSP	DESP_HUMAN	P15924	A_32_P157945	0.274516	13.4426	2.92134	0.0100525	0.319627	1
ENSG00000087365	SF3B2	SF3B2_HUMAN	Q13435	A_23_P64083	-0.177905	13.3993	-2.9204	0.0100722	0.319627	1
ENSG00000135220	UGT2A3	UD2A3_HUMAN	Q6UWM9	A_24_P334378	0.256546	6.90282	2.92038	0.0100727	0.319627	1
ENSG00000250612	-	-	-	A_24_P334378	0.256546	6.90282	2.92038	0.0100727	0.319627	1
ENSG00000168959	GRM5	GRM5_HUMAN	P41594	A_23_P24361	-0.269923	7.09653	-2.91899	0.0101016	0.319945	1
ENSG00000148019	CEP78	CEP78_HUMAN	Q5JTW2	A_23_P353436	0.240941	10.0537	2.91876	0.0101064	0.319945	1
ENSG00000229980	-	-	-	A_32_P66306	0.195314	7.53291	2.91841	0.0101139	0.319945	1
ENSG00000272010	-	-	-	A_32_P213917	0.240632	7.10947	2.91755	0.0101319	0.319945	1
ENSG00000104218	CSPP1	CSPP1_HUMAN	Q1MSJ5	A_23_P169558	-0.216189	9.33943	-2.91738	0.0101355	0.319945	1
ENSG00000140750	ARHGAP17	RHG17_HUMAN	Q68EM7	A_24_P401739	0.273909	11.8417	2.91729	0.0101372	0.319945	1
ENSG00000120860	CCDC53	CCD53_HUMAN	Q9Y3C0	A_23_P53567	0.200174	10.4188	2.9167	0.0101496	0.320074	1
ENSG00000150459	SAP18	SAP18_HUMAN	O00422	A_32_P167493	0.202472	13.6752	2.91542	0.0101765	0.320074	1
ENSG00000143315	PIGM	PIGM_HUMAN	Q9H3S5	A_23_P103248	0.201908	10.2791	2.9153	0.0101792	0.320074	1
ENSG00000101158	NELFCD	NELFD_HUMAN	Q8IXH7	A_23_P210643	-0.220842	10.5854	-2.91489	0.0101878	0.320074	1
ENSG00000101158	TH1L	NELFD_HUMAN	Q8IXH7	A_23_P210643	-0.220842	10.5854	-2.91489	0.0101878	0.320074	1
ENSG00000059377	TBXAS1	THAS_HUMAN	P24557	A_32_P212886	0.244764	9.32101	2.91417	0.010203	0.320074	1
ENSG00000131620	ANO1	ANO1_HUMAN	Q5XXA6	A_24_P110831	0.291309	6.94858	2.91416	0.0102031	0.320074	1
ENSG00000141736	ERBB2	ERBB2_HUMAN	P04626	A_23_P89249	-0.23332	12.4306	-2.91414	0.0102036	0.320074	1
ENSG00000136770	DNAJC1	DNJC1_HUMAN	Q96KC8	A_23_P127128	0.223672	11.7733	2.91368	0.0102133	0.320134	1
ENSG00000160007	GRLF1	-	-	A_24_P44845	-0.2984	8.84469	-2.91287	0.0102306	0.320292	1
ENSG00000279392	-	-	-	A_32_P91250	0.234483	12.8493	2.91271	0.0102339	0.320292	1
ENSG00000185651	UBE2L3	UB2L3_HUMAN	P68036	A_32_P91250	0.234483	12.8493	2.91271	0.0102339	0.320292	1
ENSG00000163519	TRAT1	TRAT1_HUMAN	Q6PIZ9	A_23_P212568	0.224681	7.1691	2.91225	0.0102436	0.32035	1
ENSG00000178279	TNP2	STP2_HUMAN	Q05952	A_23_P326785	0.24459	7.06433	2.91092	0.0102719	0.320992	1
ENSG00000166130	IKBIP	IKIP_HUMAN	Q70UQ0	A_23_P53467	0.191846	9.76754	2.91005	0.0102904	0.321326	1
ENSG00000100083	GGA1	GGA1_HUMAN	Q9UJY5	A_23_P132294	0.394666	13.3791	2.90892	0.0103145	0.321589	1
ENSG00000279636	-	-	-	A_24_P189873	-0.260309	6.89277	-2.90793	0.0103357	0.321644	1
ENSG00000270025	-	-	-	A_32_P144208	-0.23286	7.936	-2.90734	0.0103484	0.321644	1
ENSG00000251079	-	-	-	A_32_P144208	-0.23286	7.936	-2.90734	0.0103484	0.321644	1
ENSG00000254929	-	-	-	A_32_P144208	-0.23286	7.936	-2.90734	0.0103484	0.321644	1
ENSG00000247193	-	-	-	A_24_P388703	-0.201822	7.40203	-2.90683	0.0103592	0.321644	1
ENSG00000107140	TESK1	TESK1_HUMAN	Q15569	A_23_P169178	0.304511	11.9756	2.90673	0.0103614	0.321644	1
ENSG00000074527	NTN4	NET4_HUMAN	Q9HB63	A_23_P204630	0.289903	10.2684	2.90651	0.0103662	0.321644	1
ENSG00000198162	MAN1A2	MA1A2_HUMAN	O60476	A_32_P88598	0.260197	11.6327	2.90566	0.0103844	0.321644	1
ENSG00000117643	MAN1C1	MA1C1_HUMAN	Q9NR34	A_23_P103601	-0.445894	10.2479	-2.90476	0.0104038	0.321644	1
ENSG00000117533	VAMP4	VAMP4_HUMAN	O75379	A_24_P942030	0.213619	7.37022	2.90466	0.010406	0.321644	1
ENSG00000148660	CAMK2G	KCC2G_HUMAN	Q13555	A_24_P141332	0.217289	10.4155	2.90462	0.0104067	0.321644	1
ENSG00000134686	PHC2	PHC2_HUMAN	Q8IXK0	A_23_P423864	0.221231	11.7773	2.90446	0.0104102	0.321644	1
ENSG00000118729	CASQ2	CASQ2_HUMAN	O14958	A_23_P126582	0.2629	6.96656	2.90324	0.0104366	0.321984	1
ENSG00000236609	ZNF853	ZN853_HUMAN	P0CG23	A_23_P302207	-0.221558	8.68801	-2.90305	0.0104407	0.321984	1
ENSG00000138663	COPS4	CSN4_HUMAN	Q9BT78	A_23_P43779	0.18106	11.7841	2.9025	0.0104526	0.321984	1
ENSG00000273011	-	-	-	A_24_P98145	0.234013	6.9791	2.90153	0.0104737	0.321984	1
ENSG00000237964	-	-	-	A_32_P775679	-0.219119	6.88229	-2.90125	0.0104797	0.321984	1
ENSG00000118990	-	-	-	A_24_P126741	0.237204	9.48246	2.90108	0.0104833	0.321984	1
ENSG00000254851	-	-	-	A_23_P203095	-0.230162	8.34829	-2.90081	0.0104893	0.321984	1
ENSG00000160613	PCSK7	PCSK7_HUMAN	Q16549	A_23_P203095	-0.230162	8.34829	-2.90081	0.0104893	0.321984	1
ENSG00000107821	KAZALD1	KAZD1_HUMAN	Q96I82	A_24_P192727	0.259811	9.33273	2.90065	0.0104928	0.321984	1
ENSG00000139921	TMX1	TMX1_HUMAN	Q9H3N1	A_23_P76951	-0.222857	12.7278	-2.90019	0.0105026	0.321984	1
ENSG00000254926	-	-	-	A_23_P52951	0.227855	7.18607	2.90011	0.0105045	0.321984	1
ENSG00000163554	SPTA1	SPTA1_HUMAN	P02549	A_23_P63158	-0.225898	7.02329	-2.89997	0.0105074	0.321984	1
ENSG00000077009	NMRK2	NRK2_HUMAN	Q9NPI5	A_24_P404458	-0.272434	9.57276	-2.8972	0.0105679	0.322748	1
ENSG00000259306	-	-	-	A_32_P128280	0.204138	7.13079	2.89673	0.0105781	0.322748	1
ENSG00000162490	DRAXIN	DRAXI_HUMAN	Q8NBI3	A_24_P68008	-0.350644	10.9872	-2.89606	0.0105929	0.322748	1
ENSG00000106479	ZNF862	ZN862_HUMAN	O60290	A_24_P333421	0.2102	8.08552	2.89588	0.0105968	0.322748	1
ENSG00000139287	TPH2	TPH2_HUMAN	Q8IWU9	A_24_P401787	-0.258383	7.00655	-2.89518	0.0106121	0.322748	1
ENSG00000198707	CEP290	CE290_HUMAN	O15078	A_24_P51067	-0.193826	7.51546	-2.89515	0.0106127	0.322748	1
ENSG00000160401	C9orf117	CI117_HUMAN	Q5JU67	A_24_P229638	-0.208085	7.01406	-2.89457	0.0106256	0.322748	1
ENSG00000104325	DECR1	DECR_HUMAN	Q16698	A_24_P269619	0.210766	10.6059	2.89456	0.0106258	0.322748	1
ENSG00000131943	C19orf12	CS012_HUMAN	Q9NSK7	A_24_P113341	0.189822	11.1339	2.89453	0.0106264	0.322748	1
ENSG00000165478	HEPACAM	HECAM_HUMAN	Q14CZ8	A_24_P213950	0.226221	7.14584	2.8943	0.0106316	0.322748	1
ENSG00000133800	LYVE1	LYVE1_HUMAN	Q9Y5Y7	A_23_P150457	0.180393	7.00519	2.89421	0.0106333	0.322748	1
ENSG00000256087	ZNF432	ZN432_HUMAN	O94892	A_23_P208210	0.182114	8.24138	2.89397	0.0106388	0.322748	1
ENSG00000136488	CSH1	CSH1_HUMAN	P0DML2	A_23_P207154	-0.353119	7.78313	-2.89335	0.0106523	0.322748	1
ENSG00000213218	CSH1	CSH2_HUMAN	P0DML3	A_23_P207154	-0.353119	7.78313	-2.89335	0.0106523	0.322748	1
ENSG00000213218	CSH2	CSH2_HUMAN	P0DML3	A_23_P207154	-0.353119	7.78313	-2.89335	0.0106523	0.322748	1
ENSG00000231532	-	-	-	A_32_P83270	0.203478	7.02534	2.89306	0.0106588	0.322748	1
ENSG00000242335	CFB	CFAB_HUMAN	P00751	A_23_P156687	0.279148	7.0233	2.89274	0.0106658	0.322748	1
ENSG00000241534	CFB	CFAB_HUMAN	P00751	A_23_P156687	0.279148	7.0233	2.89274	0.0106658	0.322748	1
ENSG00000239754	CFB	CFAB_HUMAN	P00751	A_23_P156687	0.279148	7.0233	2.89274	0.0106658	0.322748	1
ENSG00000241253	CFB	CFAB_HUMAN	P00751	A_23_P156687	0.279148	7.0233	2.89274	0.0106658	0.322748	1
ENSG00000243649	CFB	CFAB_HUMAN	P00751	A_23_P156687	0.279148	7.0233	2.89274	0.0106658	0.322748	1
ENSG00000244255	-	-	-	A_23_P156687	0.279148	7.0233	2.89274	0.0106658	0.322748	1
ENSG00000243570	CFB	CFAB_HUMAN	P00751	A_23_P156687	0.279148	7.0233	2.89274	0.0106658	0.322748	1
ENSG00000154359	LONRF1	LONF1_HUMAN	Q17RB8	A_32_P194032	0.208456	11.2763	2.89169	0.0106889	0.322939	1
ENSG00000023228	NDUFS1	NDUS1_HUMAN	P28331	A_23_P131363	-0.227699	11.5886	-2.89139	0.0106957	0.322939	1
ENSG00000272047	GTF2H5	TF2H5_HUMAN	Q6ZYL4	A_32_P27763	0.242992	7.17157	2.88955	0.0107364	0.323663	1
ENSG00000264944	-	-	-	A_24_P259490	-0.225978	12.2844	-2.88848	0.0107602	0.323663	1
ENSG00000143761	ARF1	ARF1_HUMAN	P84077	A_24_P259490	-0.225978	12.2844	-2.88848	0.0107602	0.323663	1
ENSG00000072849	DERL2	DERL2_HUMAN	Q9GZP9	A_23_P118749	0.205415	11.8601	2.88845	0.0107608	0.323663	1
ENSG00000269148	-	-	-	A_24_P393502	0.258249	6.88669	2.88818	0.010767	0.323663	1
ENSG00000185686	PRAME	PRAME_HUMAN	P78395	A_24_P216361	-0.2205	7.06176	-2.88718	0.0107892	0.324004	1
ENSG00000142186	SCYL1	NTKL_HUMAN	Q96KG9	A_24_P30314	0.208401	13.189	2.88657	0.0108029	0.324004	1
ENSG00000139977	NAA30	NAA30_HUMAN	Q147X3	A_23_P25868	0.213762	9.82436	2.88629	0.0108091	0.324004	1
ENSG00000166387	PPFIBP2	LIPB2_HUMAN	Q8ND30	A_23_P409623	0.345281	10.964	2.88604	0.0108146	0.324004	1
ENSG00000134042	MRO	MSTRO_HUMAN	Q9BYG7	A_23_P4545	-0.189579	7.14345	-2.88566	0.0108231	0.324004	1
ENSG00000165948	IFI27L1	I27L1_HUMAN	Q96BM0	A_23_P53976	0.212955	13.3299	2.88555	0.0108256	0.324004	1
ENSG00000234008	-	-	-	A_32_P780623	-0.238326	7.07851	-2.88328	0.0108766	0.325056	1
ENSG00000172572	PDE3A	PDE3A_HUMAN	Q14432	A_32_P4778	-0.192542	7.11491	-2.88256	0.0108927	0.325301	1
ENSG00000089327	FXYD5	FXYD5_HUMAN	Q96DB9	A_23_P130995	-0.229802	10.3614	-2.88167	0.0109128	0.325459	1
ENSG00000165617	DACT1	DACT1_HUMAN	Q9NYF0	A_23_P65518	-0.703258	10.1197	-2.88163	0.0109138	0.325459	1
ENSG00000180957	PITPNB	PIPNB_HUMAN	P48739	A_23_P17786	-0.261163	10.0875	-2.88116	0.0109244	0.325537	1
ENSG00000101082	SLA2	SLAP2_HUMAN	Q9H6Q3	A_23_P143173	-0.247332	7.15828	-2.87987	0.0109534	0.325944	1
ENSG00000158560	DYNC1I1	DC1I1_HUMAN	O14576	A_23_P93737	0.221757	9.37068	2.87953	0.0109611	0.325944	1
ENSG00000082684	SEMA5B	SEM5B_HUMAN	Q9P283	A_23_P121374	0.278062	12.1822	2.87695	0.0110199	0.326429	1
ENSG00000164294	GPX8	GPX8_HUMAN	Q8TED1	A_23_P404259	0.19696	12.0497	2.87662	0.0110273	0.326429	1
ENSG00000100532	CGRRF1	CGRF1_HUMAN	Q99675	A_23_P37275	0.195292	10.0155	2.87588	0.0110441	0.326429	1
ENSG00000065357	DGKA	DGKA_HUMAN	P23743	A_23_P105307	-0.223423	8.67052	-2.87521	0.0110596	0.326429	1
ENSG00000262660	SLC25A10	-	-	A_23_P170352	-0.211698	12.5541	-2.87517	0.0110604	0.326429	1
ENSG00000262814	MRPL12	RM12_HUMAN	P52815	A_23_P170352	-0.211698	12.5541	-2.87517	0.0110604	0.326429	1
ENSG00000073754	CD5L	CD5L_HUMAN	O43866	A_23_P126584	0.267719	6.84859	2.87503	0.0110637	0.326429	1
ENSG00000125870	SNRPB2	RU2B_HUMAN	P08579	A_23_P40307	0.194776	11.4495	2.875	0.0110642	0.326429	1
ENSG00000172590	MRPL52	RM52_HUMAN	Q86TS9	A_24_P409330	0.200431	13.6552	2.87495	0.0110655	0.326429	1
ENSG00000047579	DTNBP1	DTBP1_HUMAN	Q96EV8	A_23_P42435	0.228083	11.0962	2.87419	0.0110828	0.326469	1
ENSG00000117151	CTBS	DIAC_HUMAN	Q01459	A_24_P940135	0.280938	9.57755	2.87172	0.0111395	0.327137	1
ENSG00000163170	BOLA3	BOLA3_HUMAN	Q53S33	A_23_P131706	0.241791	12.2363	2.87153	0.011144	0.327137	1
ENSG00000267796	LIN37	LIN37_HUMAN	Q96GY3	A_23_P165186	0.194481	9.90094	2.8709	0.0111586	0.327137	1
ENSG00000267328	-	-	-	A_23_P165186	0.194481	9.90094	2.8709	0.0111586	0.327137	1
ENSG00000188223	-	-	-	A_23_P165186	0.194481	9.90094	2.8709	0.0111586	0.327137	1
ENSG00000275023	MLLT6	-	-	A_24_P719579	0.225725	10.2624	2.87081	0.0111605	0.327137	1
ENSG00000277972	CISD3	CISD3_HUMAN	P0C7P0	A_24_P719579	0.225725	10.2624	2.87081	0.0111605	0.327137	1
ENSG00000136881	BAAT	BAAT_HUMAN	Q14032	A_23_P71810	-0.22759	7.0484	-2.87055	0.0111665	0.327137	1
ENSG00000179295	PTPN11	PTN11_HUMAN	Q06124	A_23_P204090	-0.218216	8.37588	-2.87048	0.0111682	0.327137	1
ENSG00000121653	MAPK8IP1	JIP1_HUMAN	Q9UQF2	A_23_P116007	-0.286588	7.84179	-2.87009	0.0111771	0.327137	1
ENSG00000224557	-	-	-	A_23_P59167	-0.300658	8.15805	-2.86841	0.0112161	0.327975	1
ENSG00000184207	PGP	PGP_HUMAN	A6NDG6	A_23_P66100	0.209835	7.55477	2.86783	0.0112294	0.327975	1
ENSG00000204403	CASP12	CASPC_HUMAN	Q6UXS9	A_23_P13102	-0.218371	6.90251	-2.86782	0.0112297	0.327975	1
ENSG00000100092	SH3BP1	3BP1_HUMAN	Q9Y3L3	A_24_P259192	-0.199946	8.03279	-2.86676	0.0112544	0.32808	1
ENSG00000134765	DSC1	DSC1_HUMAN	Q08554	A_23_P38696	-0.291339	7.01513	-2.86674	0.0112549	0.32808	1
ENSG00000143006	DMRTB1	DMRTB_HUMAN	Q96MA1	A_23_P417821	-0.185736	7.27569	-2.86615	0.0112685	0.32808	1
ENSG00000197933	ZNF823	ZN823_HUMAN	P16415	A_23_P39050	0.239326	8.80086	2.86604	0.011271	0.32808	1
ENSG00000211456	SACM1L	SAC1_HUMAN	Q9NTJ5	A_23_P212383	0.353208	11.8668	2.86575	0.0112777	0.32808	1
ENSG00000111269	CREBL2	CRBL2_HUMAN	O60519	A_24_P56194	0.21083	8.84494	2.86561	0.0112812	0.32808	1
ENSG00000233838	-	-	-	A_24_P211351	0.250321	11.9732	2.86513	0.0112922	0.328169	1
ENSG00000108384	RAD51C	RA51C_HUMAN	O43502	A_32_P24359	0.276717	7.23146	2.86458	0.0113051	0.328213	1
ENSG00000158234	FAIM	FAIM1_HUMAN	Q9NVQ4	A_23_P253932	0.181748	11.1139	2.86438	0.0113097	0.328213	1
ENSG00000197136	PCNXL3	PCX3_HUMAN	Q9H6A9	A_24_P333123	-0.189047	7.20916	-2.86372	0.0113251	0.328406	1
ENSG00000151553	FAM160B1	F16B1_HUMAN	Q5W0V3	A_24_P325107	-0.21158	8.27375	-2.8627	0.0113491	0.328406	1
ENSG00000260092	-	-	-	A_23_P430670	-0.209689	7.33157	-2.86268	0.0113496	0.328406	1
ENSG00000135702	CHST5	CHST5_HUMAN	Q9GZS9	A_23_P430670	-0.209689	7.33157	-2.86268	0.0113496	0.328406	1
ENSG00000148200	NR6A1	NR6A1_HUMAN	Q15406	A_23_P216900	-0.190711	8.1719	-2.86221	0.0113607	0.328406	1
ENSG00000126870	WDR60	WDR60_HUMAN	Q8WVS4	A_23_P157361	0.238434	9.01512	2.8618	0.0113701	0.328406	1
ENSG00000111412	C12orf49	CL049_HUMAN	Q9H741	A_24_P715924	0.191015	10.5967	2.86134	0.0113811	0.328406	1
ENSG00000239883	-	-	-	A_23_P377411	-0.254962	7.13769	-2.86104	0.0113881	0.328406	1
ENSG00000178440	-	-	-	A_23_P377411	-0.254962	7.13769	-2.86104	0.0113881	0.328406	1
ENSG00000272140	-	-	-	A_23_P377411	-0.254962	7.13769	-2.86104	0.0113881	0.328406	1
ENSG00000108187	PBLD	PBLD_HUMAN	P30039	A_23_P149998	0.18536	8.04173	2.86103	0.0113883	0.328406	1
ENSG00000173013	CCDC96	CCD96_HUMAN	Q2M329	A_32_P69930	0.226472	9.34388	2.86048	0.0114012	0.328549	1
ENSG00000197429	IPP	IPP_HUMAN	Q9Y573	A_23_P9662	0.185061	9.49264	2.85922	0.0114309	0.329105	1
ENSG00000153086	-	-	-	A_23_P376727	-0.310258	6.90426	-2.85898	0.0114365	0.329105	1
ENSG00000162490	DRAXIN	DRAXI_HUMAN	Q8NBI3	A_24_P109417	-0.316502	8.93327	-2.85778	0.011465	0.329693	1
ENSG00000198189	HSD17B11	DHB11_HUMAN	Q8NBQ5	A_23_P408271	0.22557	9.16508	2.85652	0.0114949	0.329795	1
ENSG00000103811	CTSH	CATH_HUMAN	P09668	A_23_P14774	0.262234	10.9331	2.85628	0.0115006	0.329795	1
ENSG00000183654	40603	MARHB_HUMAN	A6NNE9	A_24_P33508	0.249449	10.1683	2.85503	0.0115303	0.329978	1
ENSG00000154548	SRSF12	SRS12_HUMAN	Q8WXF0	A_32_P456318	0.237485	8.71739	2.85491	0.0115332	0.329978	1
ENSG00000132669	RIN2	RIN2_HUMAN	Q8WYP3	A_23_P91379	-0.196529	7.05711	-2.85445	0.011544	0.329978	1
ENSG00000186910	SERPINA11	SPA11_HUMAN	Q86U17	A_23_P105973	-0.251533	7.04387	-2.85311	0.0115762	0.329978	1
ENSG00000106538	RARRES2	RARR2_HUMAN	Q99969	A_23_P134237	-0.348056	11.6	-2.85288	0.0115815	0.329978	1
ENSG00000185222	WBP5	WBP5_HUMAN	Q9UHQ7	A_23_P34142	0.232931	12.683	2.85288	0.0115816	0.329978	1
ENSG00000185664	PMEL	PMEL_HUMAN	P40967	A_23_P312851	-0.364363	9.98157	-2.85276	0.0115845	0.329978	1
ENSG00000146112	PPP1R18	PPR18_HUMAN	Q6NYC8	A_23_P331479	-0.194545	11.1805	-2.85262	0.0115879	0.329978	1
ENSG00000179387	ELMOD2	ELMD2_HUMAN	Q8IZ81	A_23_P7282	0.220574	11.876	2.85258	0.0115888	0.329978	1
ENSG00000065183	WDR3	WDR3_HUMAN	Q9UNX4	A_23_P23318	-0.243483	10.4997	-2.85137	0.0116177	0.329978	1
ENSG00000019144	PHLDB1	PHLB1_HUMAN	Q86UU1	A_23_P24555	-0.253206	8.09925	-2.85043	0.0116404	0.329978	1
ENSG00000157693	C9orf91	CI091_HUMAN	Q5VZI3	A_24_P4373	0.171553	8.80768	2.85021	0.0116456	0.329978	1
ENSG00000186184	POLR1D	RPAC2_HUMAN	Q9Y2S0	A_23_P409541	0.211941	10.0573	2.84956	0.0116612	0.329978	1
ENSG00000278677	HIST1H2AG	H2A1_HUMAN	P0C0S8	A_32_P221799	-0.333028	10.4051	-2.84897	0.0116755	0.329978	1
ENSG00000278677	HIST1H2AI	H2A1_HUMAN	P0C0S8	A_32_P221799	-0.333028	10.4051	-2.84897	0.0116755	0.329978	1
ENSG00000278677	HIST1H2AK	H2A1_HUMAN	P0C0S8	A_32_P221799	-0.333028	10.4051	-2.84897	0.0116755	0.329978	1
ENSG00000278677	HIST1H2AL	H2A1_HUMAN	P0C0S8	A_32_P221799	-0.333028	10.4051	-2.84897	0.0116755	0.329978	1
ENSG00000278677	HIST1H2AM	H2A1_HUMAN	P0C0S8	A_32_P221799	-0.333028	10.4051	-2.84897	0.0116755	0.329978	1
ENSG00000128524	ATP6V1F	VATF_HUMAN	Q16864	A_23_P93623	0.204705	14.2	2.84853	0.011686	0.329978	1
ENSG00000154265	ABCA5	ABCA5_HUMAN	Q8WWZ7	A_24_P67096	0.232255	7.82079	2.84849	0.0116871	0.329978	1
ENSG00000154265	DKFZp686K07118	ABCA5_HUMAN	Q8WWZ7	A_24_P67096	0.232255	7.82079	2.84849	0.0116871	0.329978	1
ENSG00000049759	NEDD4L	NED4L_HUMAN	Q96PU5	A_23_P27279	-0.217298	11.0169	-2.84783	0.0117029	0.329978	1
ENSG00000144711	IQSEC1	IQEC1_HUMAN	Q6DN90	A_24_P414187	-0.183793	7.28327	-2.84767	0.0117067	0.329978	1
ENSG00000042781	USH2A	USH2A_HUMAN	O75445	A_23_P86301	0.23032	6.97351	2.84712	0.0117199	0.329978	1
ENSG00000149313	AASDHPPT	ADPPT_HUMAN	Q9NRN7	A_24_P295620	0.230619	10.7698	2.84709	0.0117208	0.329978	1
ENSG00000099381	SETD1A	SET1A_HUMAN	O15047	A_23_P129678	-0.213158	8.50468	-2.847	0.0117229	0.329978	1
ENSG00000124198	ARFGEF2	BIG2_HUMAN	Q9Y6D5	A_23_P5995	-0.202568	8.80492	-2.84692	0.0117248	0.329978	1
ENSG00000174898	CATSPERD	CTSRD_HUMAN	Q86XM0	A_23_P340822	-0.230041	6.9975	-2.8468	0.0117279	0.329978	1
ENSG00000137824	RMDN3	RMD3_HUMAN	Q96TC7	A_23_P152087	0.21799	11.8082	2.84641	0.0117372	0.329978	1
ENSG00000266522	-	-	-	A_24_P477102	-0.25555	10.0017	-2.8463	0.0117399	0.329978	1
ENSG00000232760	-	-	-	A_24_P477102	-0.25555	10.0017	-2.8463	0.0117399	0.329978	1
ENSG00000011347	SYT7	SYT7_HUMAN	O43581	A_23_P161935	-0.246213	7.04892	-2.84538	0.0117621	0.330311	1
ENSG00000162545	CAMK2N1	CK2N1_HUMAN	Q7Z7J9	A_24_P117620	0.245221	9.63782	2.84485	0.0117751	0.330311	1
ENSG00000105499	PLA2G4C	PA24C_HUMAN	Q9UP65	A_24_P316439	-0.186745	6.88978	-2.84482	0.0117759	0.330311	1
ENSG00000107815	PEO1	PEO1_HUMAN	Q96RR1	A_23_P138461	-0.214106	8.6029	-2.844	0.0117956	0.330495	1
ENSG00000007264	MATK	MATK_HUMAN	P42679	A_23_P50678	-0.233896	8.11574	-2.84387	0.0117988	0.330495	1
ENSG00000169059	VCX3A	VCX3_HUMAN	Q9NNX9	A_24_P230282	0.242472	7.77017	2.84249	0.0118325	0.330495	1
ENSG00000182583	VCX	VCX1_HUMAN	Q9H320	A_24_P230282	0.242472	7.77017	2.84249	0.0118325	0.330495	1
ENSG00000177504	VCX2	VCX2_HUMAN	Q9H322	A_24_P230282	0.242472	7.77017	2.84249	0.0118325	0.330495	1
ENSG00000205642	VCX3B	VCX3B_HUMAN	Q9H321	A_24_P230282	0.242472	7.77017	2.84249	0.0118325	0.330495	1
ENSG00000143845	ETNK2	EKI2_HUMAN	Q9NVF9	A_23_P46025	-0.206603	7.99896	-2.84246	0.0118332	0.330495	1
ENSG00000151135	TMEM263	TM263_HUMAN	Q8WUH6	A_23_P410613	0.215306	10.8747	2.84238	0.0118353	0.330495	1
ENSG00000214125	-	-	-	A_24_P341731	-0.213344	11.2993	-2.84084	0.0118728	0.330495	1
ENSG00000185485	-	-	-	A_24_P315873	-0.296589	10.1145	-2.84081	0.0118736	0.330495	1
ENSG00000215837	-	-	-	A_24_P315873	-0.296589	10.1145	-2.84081	0.0118736	0.330495	1
ENSG00000242086	-	-	-	A_24_P315873	-0.296589	10.1145	-2.84081	0.0118736	0.330495	1
ENSG00000067113	PPAP2A	LPP1_HUMAN	O14494	A_23_P70060	0.254815	13.6732	2.84007	0.0118918	0.330495	1
ENSG00000102755	FLT1	VGFR1_HUMAN	P17948	A_24_P42755	-0.386929	9.66703	-2.83933	0.01191	0.330495	1
ENSG00000072415	MPP5	MPP5_HUMAN	Q8N3R9	A_24_P347458	-0.252566	8.46875	-2.83905	0.0119168	0.330495	1
ENSG00000087245	MMP2	MMP2_HUMAN	P08253	A_23_P163787	-0.185485	8.46471	-2.8383	0.0119352	0.330495	1
ENSG00000095209	TMEM38B	TM38B_HUMAN	Q9NVV0	A_23_P60259	0.234821	8.76281	2.83804	0.0119417	0.330495	1
ENSG00000110583	NAA40	NAA40_HUMAN	Q86UY6	A_23_P35782	-0.276835	8.63551	-2.83804	0.0119417	0.330495	1
ENSG00000143153	ATP1B1	AT1B1_HUMAN	P05026	A_23_P62932	-0.258524	13.1853	-2.8377	0.01195	0.330495	1
ENSG00000137947	GTF2B	TF2B_HUMAN	Q00403	A_23_P34628	0.225646	9.95621	2.83712	0.0119644	0.330495	1
ENSG00000154358	OBSCN	OBSCN_HUMAN	Q5VST9	A_23_P201109	-0.282703	7.1013	-2.83707	0.0119656	0.330495	1
ENSG00000204311	DFNB59	PJVK_HUMAN	Q0ZLH3	A_24_P630490	0.308165	7.78111	2.83691	0.0119696	0.330495	1
ENSG00000009413	REV3L	DPOLZ_HUMAN	O60673	A_23_P214139	0.272514	9.52028	2.83667	0.0119753	0.330495	1
ENSG00000140545	MFGE8	MFGM_HUMAN	Q08431	A_24_P133584	-0.305407	10.0709	-2.83389	0.0120442	0.332169	1
ENSG00000182389	CACNB4	CACB4_HUMAN	O00305	A_23_P209227	0.244031	6.98127	2.83293	0.0120682	0.332228	1
ENSG00000271855	-	-	-	A_32_P182045	0.191443	8.18883	2.8327	0.0120737	0.332228	1
ENSG00000088340	-	-	-	A_24_P23454	0.21732	7.02564	2.83251	0.0120787	0.332228	1
ENSG00000273345	-	-	-	A_23_P110643	0.225657	8.50767	2.83152	0.0121032	0.332366	1
ENSG00000006837	CDKL3	CDKL3_HUMAN	Q8IVW4	A_23_P110643	0.225657	8.50767	2.83152	0.0121032	0.332366	1
ENSG00000101126	ADNP	ADNP_HUMAN	Q9H2P0	A_23_P254179	0.234445	11.8558	2.8308	0.0121213	0.332366	1
ENSG00000102452	NALCN	NALCN_HUMAN	Q8IZF0	A_23_P76633	-0.213726	6.89121	-2.8302	0.0121362	0.332366	1
ENSG00000143443	MENT	MENT_HUMAN	Q9BUN1	A_24_P234116	-0.262651	10.8287	-2.83011	0.0121385	0.332366	1
ENSG00000148090	AUH	AUHM_HUMAN	Q13825	A_23_P20852	0.1798	10.4333	2.83008	0.0121392	0.332366	1
ENSG00000110536	PTPMT1	PTPM1_HUMAN	Q8WUK0	A_24_P110062	0.183604	8.34441	2.82952	0.0121533	0.332366	1
ENSG00000150510	FAM124A	F124A_HUMAN	Q86V42	A_24_P239538	0.221097	9.63184	2.82935	0.0121576	0.332366	1
ENSG00000183495	EP400	EP400_HUMAN	Q96L91	A_24_P298939	-0.229761	8.31604	-2.82888	0.0121693	0.332366	1
ENSG00000166483	WEE1	WEE1_HUMAN	P30291	A_23_P127926	-0.279908	10.4172	-2.82833	0.0121831	0.332366	1
ENSG00000263069	-	-	-	A_23_P372074	0.258488	7.01782	2.82813	0.012188	0.332366	1
ENSG00000100154	TTC28	TTC28_HUMAN	Q96AY4	A_23_P29185	0.194936	9.05497	2.82739	0.0122068	0.332366	1
ENSG00000142002	DPP9	DPP9_HUMAN	Q86TI2	A_24_P288323	-0.216255	7.44518	-2.82585	0.0122455	0.332366	1
ENSG00000108349	CASC3	CASC3_HUMAN	O15234	A_24_P125353	-0.205448	8.05649	-2.82563	0.0122512	0.332366	1
ENSG00000163530	DPPA2	DPPA2_HUMAN	Q7Z7J5	A_23_P405885	-0.310793	9.27672	-2.82546	0.0122553	0.332366	1
ENSG00000139263	LRIG3	LRIG3_HUMAN	Q6UXM1	A_23_P47885	0.315449	12.9032	2.82518	0.0122624	0.332366	1
ENSG00000187653	-	-	-	A_24_P143189	0.208711	15.9655	2.82511	0.0122641	0.332366	1
ENSG00000230043	-	-	-	A_24_P143189	0.208711	15.9655	2.82511	0.0122641	0.332366	1
ENSG00000205542	TMSB4X	TYB4_HUMAN	P62328	A_24_P143189	0.208711	15.9655	2.82511	0.0122641	0.332366	1
ENSG00000236876	-	-	-	A_24_P143189	0.208711	15.9655	2.82511	0.0122641	0.332366	1
ENSG00000223551	TMSB4XP4	-	-	A_24_P143189	0.208711	15.9655	2.82511	0.0122641	0.332366	1
ENSG00000165810	BTNL9	BTNL9_HUMAN	Q6UXG8	A_23_P81280	0.20719	6.97923	2.825	0.012267	0.332366	1
ENSG00000250151	ARPC4-TTLL3	-	-	A_23_P380928	0.215905	8.45645	2.82489	0.0122697	0.332366	1
ENSG00000214021	TTLL3	TTLL3_HUMAN	Q9Y4R7	A_23_P380928	0.215905	8.45645	2.82489	0.0122697	0.332366	1
ENSG00000154274	C4orf19	CD019_HUMAN	Q8IY42	A_23_P29975	0.191859	7.2267	2.82423	0.0122866	0.332385	1
ENSG00000142619	PADI3	PADI3_HUMAN	Q9ULW8	A_23_P126869	-0.227579	6.97862	-2.82353	0.0123042	0.332466	1
ENSG00000248925	-	-	-	A_32_P129243	-0.192752	6.91284	-2.82316	0.0123136	0.332466	1
ENSG00000221972	C3orf36	CC036_HUMAN	Q3SXR2	A_23_P92176	-0.250306	7.08121	-2.82219	0.0123381	0.332466	1
ENSG00000168032	ENTPD3	ENTP3_HUMAN	O75355	A_23_P29697	-0.238923	6.97506	-2.82136	0.0123594	0.332687	1
ENSG00000113441	LNPEP	LCAP_HUMAN	Q9UIQ6	A_32_P69475	0.166953	9.32665	2.82101	0.0123682	0.332687	1
ENSG00000113719	ERGIC1	ERGI1_HUMAN	Q969X5	A_23_P404871	0.235511	10.173	2.8204	0.0123839	0.332687	1
ENSG00000101367	MAPRE1	MARE1_HUMAN	Q15691	A_24_P220058	0.222867	12.6072	2.82028	0.0123868	0.332687	1
ENSG00000159023	EPB41	41_HUMAN	P11171	A_24_P558070	0.197356	6.97973	2.81852	0.0124319	0.33368	1
ENSG00000047410	TPR	TPR_HUMAN	P12270	A_24_P179611	-0.262741	12.2372	-2.81776	0.0124513	0.333917	1
ENSG00000047410	Tpr	TPR_HUMAN	P12270	A_24_P179611	-0.262741	12.2372	-2.81776	0.0124513	0.333917	1
ENSG00000145423	SFRP2	SFRP2_HUMAN	Q96HF1	A_23_P81103	-0.433388	9.63864	-2.8171	0.0124683	0.333917	1
ENSG00000132972	RNF17	RNF17_HUMAN	Q9BXT8	A_23_P204913	0.25848	6.98102	2.81699	0.0124712	0.333917	1
ENSG00000196967	ZNF585A	Z585A_HUMAN	Q6P3V2	A_24_P267522	-0.199333	7.31649	-2.81528	0.012515	0.333917	1
ENSG00000137872	SEMA6D	SEM6D_HUMAN	Q8NFY4	A_23_P420442	0.328006	10.1619	2.81365	0.0125571	0.333917	1
ENSG00000126934	MAP2K2	MP2K2_HUMAN	P36507	A_23_P208835	-0.202607	11.9739	-2.81353	0.0125603	0.333917	1
ENSG00000113657	DPYSL3	DPYL3_HUMAN	Q14195	A_24_P149036	-0.233318	13.6676	-2.81352	0.0125606	0.333917	1
ENSG00000154358	OBSCN	OBSCN_HUMAN	Q5VST9	A_24_P359389	0.199493	6.89411	2.81349	0.0125613	0.333917	1
ENSG00000163050	ADCK3	ADCK3_HUMAN	Q8NI60	A_23_P85598	-0.203213	8.41947	-2.81314	0.0125704	0.333917	1
ENSG00000164048	ZNF589	ZN589_HUMAN	Q86UQ0	A_23_P110031	-0.195771	10.2454	-2.8127	0.0125817	0.333917	1
ENSG00000135218	CD36	CD36_HUMAN	P16671	A_23_P111583	0.198184	7.17325	2.81266	0.0125829	0.333917	1
ENSG00000119912	IDE	IDE_HUMAN	P14735	A_23_P63681	0.188785	10.5414	2.81263	0.0125835	0.333917	1
ENSG00000275221	HIST1H2AG	H2A1_HUMAN	P0C0S8	A_24_P217848	-0.323076	13.7816	-2.81247	0.0125877	0.333917	1
ENSG00000275221	HIST1H2AI	H2A1_HUMAN	P0C0S8	A_24_P217848	-0.323076	13.7816	-2.81247	0.0125877	0.333917	1
ENSG00000275221	HIST1H2AK	H2A1_HUMAN	P0C0S8	A_24_P217848	-0.323076	13.7816	-2.81247	0.0125877	0.333917	1
ENSG00000275221	HIST1H2AL	H2A1_HUMAN	P0C0S8	A_24_P217848	-0.323076	13.7816	-2.81247	0.0125877	0.333917	1
ENSG00000275221	HIST1H2AM	H2A1_HUMAN	P0C0S8	A_24_P217848	-0.323076	13.7816	-2.81247	0.0125877	0.333917	1
ENSG00000258274	-	-	-	A_32_P66616	-0.217464	7.05093	-2.81226	0.0125931	0.333917	1
ENSG00000137757	CASP5	CASP5_HUMAN	P51878	A_23_P47304	0.517752	7.17599	2.81188	0.0126031	0.333917	1
ENSG00000211896	IGHG1	IGHG1_HUMAN	P01857	A_23_P384127	0.198839	7.03306	2.81185	0.0126039	0.333917	1
ENSG00000253755	-	-	-	A_23_P384127	0.198839	7.03306	2.81185	0.0126039	0.333917	1
ENSG00000058668	ATP2B4	AT2B4_HUMAN	P23634	A_24_P405205	0.211594	11.0996	2.81139	0.0126158	0.333917	1
ENSG00000149418	ST14	ST14_HUMAN	Q9Y5Y6	A_23_P47282	-0.212561	9.77166	-2.81076	0.0126321	0.333917	1
ENSG00000258498	-	-	-	A_24_P759584	0.242681	7.48148	2.81032	0.0126436	0.333917	1
ENSG00000004948	CALCR	CALCR_HUMAN	P30988	A_23_P134484	0.230381	11.1306	2.81	0.0126519	0.333917	1
ENSG00000259917	-	-	-	A_32_P109572	-0.197224	12.209	-2.80966	0.0126608	0.333917	1
ENSG00000196440	ARMCX4	ARMX4_HUMAN	Q5H9R4	A_24_P195821	-0.265194	6.98277	-2.80959	0.0126627	0.333917	1
ENSG00000130208	APOC1	APOC1_HUMAN	P02654	A_23_P4649	0.276629	13.5754	2.80954	0.0126639	0.333917	1
ENSG00000159363	ATP13A2	AT132_HUMAN	Q9NQ11	A_23_P12423	-0.25195	10.7313	-2.80939	0.0126677	0.333917	1
ENSG00000188820	FAM26F	FA26F_HUMAN	Q5R3K3	A_23_P7827	0.210979	7.79755	2.80937	0.0126682	0.333917	1
ENSG00000183569	SERHL2	SEHL2_HUMAN	Q9H4I8	A_23_P120953	0.263181	10.4507	2.80937	0.0126682	0.333917	1
ENSG00000146374	RSPO3	RSPO3_HUMAN	Q9BXY4	A_24_P106542	-0.216408	7.55548	-2.80862	0.012688	0.334097	1
ENSG00000134389	CFHR5	FHR5_HUMAN	Q9BXR6	A_24_P336510	-0.230208	7.11362	-2.80844	0.0126926	0.334097	1
ENSG00000244414	CFHR1	FHR1_HUMAN	Q03591	A_24_P336510	-0.230208	7.11362	-2.80844	0.0126926	0.334097	1
ENSG00000265982	-	-	-	A_32_P37089	0.19	7.42672	2.8079	0.0127067	0.334097	1
ENSG00000214176	-	-	-	A_32_P37089	0.19	7.42672	2.8079	0.0127067	0.334097	1
ENSG00000185985	SLITRK2	-	-	A_24_P66605	-0.188107	7.32199	-2.80786	0.0127076	0.334097	1
ENSG00000164733	CTSB	CATB_HUMAN	P07858	A_23_P215944	0.302687	12.0245	2.80737	0.0127206	0.334158	1
ENSG00000230896	-	-	-	A_24_P842899	0.209531	8.37767	2.80715	0.0127262	0.334158	1
ENSG00000269713	NBPF9	-	-	A_32_P27020	0.269514	12.3029	2.80647	0.0127443	0.334419	1
ENSG00000268043	NBPF12	-	-	A_32_P27020	0.269514	12.3029	2.80647	0.0127443	0.334419	1
ENSG00000263956	NBPF11	NBPFB_HUMAN	Q86T75	A_32_P27020	0.269514	12.3029	2.80647	0.0127443	0.334419	1
ENSG00000270231	-	-	-	A_32_P27020	0.269514	12.3029	2.80647	0.0127443	0.334419	1
ENSG00000162825	NBPF8	-	-	A_32_P27020	0.269514	12.3029	2.80647	0.0127443	0.334419	1
ENSG00000272150	-	-	-	A_32_P27020	0.269514	12.3029	2.80647	0.0127443	0.334419	1
ENSG00000266338	NBPF15	NBPFF_HUMAN	Q8N660	A_32_P27020	0.269514	12.3029	2.80647	0.0127443	0.334419	1
ENSG00000271383	NBPF14	-	-	A_32_P27020	0.269514	12.3029	2.80647	0.0127443	0.334419	1
ENSG00000273136	NBPF26	-	-	A_32_P27020	0.269514	12.3029	2.80647	0.0127443	0.334419	1
ENSG00000170788	DYDC1	DYDC1_HUMAN	Q8WWB3	A_23_P360990	0.241523	7.00053	2.8058	0.0127618	0.334538	1
ENSG00000185885	IFITM1	IFM1_HUMAN	P13164	A_23_P72737	0.179449	16.9405	2.80567	0.0127651	0.334538	1
ENSG00000185201	IFITM2	IFM2_HUMAN	Q01629	A_23_P72737	0.179449	16.9405	2.80567	0.0127651	0.334538	1
ENSG00000185338	SOCS1	SOCS1_HUMAN	O15524	A_23_P420196	-0.38605	9.69118	-2.8044	0.0127985	0.335023	1
ENSG00000274864	-	-	-	A_24_P101282	-0.212322	7.01465	-2.80388	0.0128121	0.335023	1
ENSG00000277694	-	-	-	A_24_P101282	-0.212322	7.01465	-2.80388	0.0128121	0.335023	1
ENSG00000276771	-	-	-	A_24_P101282	-0.212322	7.01465	-2.80388	0.0128121	0.335023	1
ENSG00000274396	-	-	-	A_24_P101282	-0.212322	7.01465	-2.80388	0.0128121	0.335023	1
ENSG00000233429	-	-	-	A_24_P101282	-0.212322	7.01465	-2.80388	0.0128121	0.335023	1
ENSG00000163867	ZMYM6	ZMYM6_HUMAN	O95789	A_23_P428729	-0.190973	7.18981	-2.80327	0.0128283	0.335023	1
ENSG00000276045	ORAI1	CRCM1_HUMAN	Q96D31	A_24_P146892	-0.218624	10.5794	-2.80317	0.012831	0.335023	1
ENSG00000175445	LPL	LIPL_HUMAN	P06858	A_23_P146233	-0.19377	7.56291	-2.80311	0.0128325	0.335023	1
ENSG00000133131	MORC4	MORC4_HUMAN	Q8TE76	A_23_P171117	0.198618	8.07719	2.80226	0.012855	0.335262	1
ENSG00000176393	RNPEP	AMPB_HUMAN	Q9H4A4	A_24_P68649	-0.219584	7.89758	-2.80215	0.012858	0.335262	1
ENSG00000279043	-	-	-	A_24_P264956	0.240447	6.99367	2.80092	0.0128905	0.335492	1
ENSG00000136488	CSH1	CSH1_HUMAN	P0DML2	A_23_P381347	-0.37232	7.93984	-2.80087	0.0128919	0.335492	1
ENSG00000213218	CSH1	CSH2_HUMAN	P0DML3	A_23_P381347	-0.37232	7.93984	-2.80087	0.0128919	0.335492	1
ENSG00000213218	CSH2	CSH2_HUMAN	P0DML3	A_23_P381347	-0.37232	7.93984	-2.80087	0.0128919	0.335492	1
ENSG00000272767	-	-	-	A_23_P86434	0.265876	9.68111	2.80071	0.0128961	0.335492	1
ENSG00000261455	-	-	-	A_32_P6172	0.219482	8.61376	2.80004	0.0129138	0.335492	1
ENSG00000163975	MFI2	TRFM_HUMAN	P08582	A_23_P212042	0.214113	7.06779	2.79997	0.0129158	0.335492	1
ENSG00000179002	TAS1R2	TS1R2_HUMAN	Q8TE23	A_23_P335957	0.282939	6.98302	2.79869	0.0129499	0.33569	1
ENSG00000185219	ZNF445	ZN445_HUMAN	P59923	A_23_P40785	-0.177559	7.14192	-2.79832	0.0129598	0.33569	1
ENSG00000106460	TMEM106B	T106B_HUMAN	Q9NUM4	A_23_P8522	0.210435	10.0575	2.79793	0.01297	0.33569	1
ENSG00000270006	-	-	-	A_32_P188	0.197345	9.17781	2.79784	0.0129724	0.33569	1
ENSG00000244038	DDOST	OST48_HUMAN	P39656	A_23_P149099	-0.220114	13.8488	-2.79706	0.0129932	0.335831	1
ENSG00000188822	CNR2	CNR2_HUMAN	P34972	A_32_P48054	-0.218466	6.9557	-2.79702	0.0129942	0.335831	1
ENSG00000104885	DOT1L	DOT1L_HUMAN	Q8TEK3	A_23_P408768	0.260318	8.83367	2.79523	0.0130422	0.336418	1
ENSG00000166197	NOLC1	NOLC1_HUMAN	Q14978	A_23_P202143	-0.246607	12.3775	-2.79479	0.0130542	0.336418	1
ENSG00000160593	AMICA1	JAML1_HUMAN	Q86YT9	A_23_P1759	-0.198195	7.12129	-2.79434	0.0130661	0.336418	1
ENSG00000271601	LIX1L	LIX1L_HUMAN	Q8IVB5	A_23_P342744	0.323301	9.41358	2.79364	0.0130849	0.336418	1
ENSG00000100714	MTHFD1	C1TC_HUMAN	P11586	A_23_P117494	-0.242308	13.1057	-2.79349	0.0130891	0.336418	1
ENSG00000231831	-	-	-	A_23_P117494	-0.242308	13.1057	-2.79349	0.0130891	0.336418	1
ENSG00000204104	TRAF3IP1	MIPT3_HUMAN	Q8TDR0	A_32_P170003	0.199876	9.63015	2.79343	0.0130906	0.336418	1
ENSG00000243064	-	-	-	A_23_P166207	-0.206517	7.11142	-2.79273	0.0131094	0.336493	1
ENSG00000105278	ZFR2	ZFR2_HUMAN	Q9UPR6	A_23_P332713	-0.238588	7.21431	-2.79173	0.0131365	0.336493	1
ENSG00000196139	AKR1C3	AK1C3_HUMAN	P42330	A_23_P138541	0.250041	9.05297	2.79156	0.013141	0.336493	1
ENSG00000082515	MRPL22	RM22_HUMAN	Q9NWU5	A_23_P122233	0.310165	13.7399	2.79156	0.0131412	0.336493	1
ENSG00000173930	SLCO4C1	SO4C1_HUMAN	Q6ZQN7	A_24_P101941	-0.247323	6.92863	-2.79075	0.0131631	0.336493	1
ENSG00000171105	INSR	INSR_HUMAN	P06213	A_23_P4764	-0.188246	7.77402	-2.79062	0.0131665	0.336493	1
ENSG00000064666	CNN2	CNN2_HUMAN	Q99439	A_23_P16673	-0.225512	13.0186	-2.79058	0.0131677	0.336493	1
ENSG00000163820	FYCO1	FYCO1_HUMAN	Q9BQS8	A_23_P212339	0.215171	9.24197	2.79045	0.0131712	0.336493	1
ENSG00000132824	SERINC3	SERC3_HUMAN	Q13530	A_23_P79836	0.252128	12.2129	2.79029	0.0131754	0.336493	1
ENSG00000276903	HIST1H2AG	H2A1_HUMAN	P0C0S8	A_23_P363174	-0.297748	8.53599	-2.78926	0.0132033	0.336518	1
ENSG00000276903	HIST1H2AI	H2A1_HUMAN	P0C0S8	A_23_P363174	-0.297748	8.53599	-2.78926	0.0132033	0.336518	1
ENSG00000276903	HIST1H2AK	H2A1_HUMAN	P0C0S8	A_23_P363174	-0.297748	8.53599	-2.78926	0.0132033	0.336518	1
ENSG00000276903	HIST1H2AL	H2A1_HUMAN	P0C0S8	A_23_P363174	-0.297748	8.53599	-2.78926	0.0132033	0.336518	1
ENSG00000276903	HIST1H2AM	H2A1_HUMAN	P0C0S8	A_23_P363174	-0.297748	8.53599	-2.78926	0.0132033	0.336518	1
ENSG00000267041	ZNF850	ZN850_HUMAN	A8MQ14	A_24_P153207	-0.198093	9.08766	-2.78857	0.0132221	0.336518	1
ENSG00000164985	PSIP1	PSIP1_HUMAN	O75475	A_32_P22702	-0.35832	10.9083	-2.78844	0.0132257	0.336518	1
ENSG00000001497	LAS1L	LAS1L_HUMAN	Q9Y4W2	A_23_P256021	-0.248293	13.2844	-2.78814	0.0132338	0.336518	1
ENSG00000173898	SPTBN2	SPTN2_HUMAN	O15020	A_23_P98282	-0.201499	8.77314	-2.78783	0.0132423	0.336518	1
ENSG00000073060	SCARB1	SCRB1_HUMAN	Q8WTV0	A_23_P369201	-0.217328	7.21052	-2.78769	0.013246	0.336518	1
ENSG00000267659	-	-	-	A_24_P677823	0.252296	6.96886	2.78731	0.0132563	0.336518	1
ENSG00000130939	UBE4B	UBE4B_HUMAN	O95155	A_23_P201279	-0.261054	11.3751	-2.78669	0.0132733	0.336518	1
ENSG00000188895	MSL1	MSL1_HUMAN	Q68DK7	A_24_P332837	0.240243	10.0076	2.78667	0.013274	0.336518	1
ENSG00000189014	-	-	-	A_32_P166598	-0.475615	10.0825	-2.78649	0.0132788	0.336518	1
ENSG00000165874	-	-	-	A_32_P166598	-0.475615	10.0825	-2.78649	0.0132788	0.336518	1
ENSG00000263146	-	-	-	A_32_P199049	-0.220947	8.8312	-2.78638	0.0132819	0.336518	1
ENSG00000130726	TRIM28	TIF1B_HUMAN	Q13263	A_24_P706901	-0.339846	10.9202	-2.786	0.0132921	0.336518	1
ENSG00000105514	RAB3D	RAB3D_HUMAN	O95716	A_24_P236956	0.180427	10.6616	2.78556	0.0133042	0.336518	1
ENSG00000057252	SOAT1	SOAT1_HUMAN	P35610	A_32_P103131	0.29031	10.3267	2.78544	0.0133074	0.336518	1
ENSG00000253564	-	-	-	A_24_P67618	-0.215937	10.5482	-2.78495	0.013321	0.336585	1
ENSG00000165704	HPRT1	HPRT_HUMAN	P00492	A_23_P11372	-0.208903	10.1759	-2.78473	0.0133268	0.336585	1
ENSG00000083814	ZNF671	ZN671_HUMAN	Q8TAW3	A_23_P50217	0.215644	10.3521	2.78445	0.0133346	0.336585	1
ENSG00000197238	HIST1H4A	H4_HUMAN	P62805	A_23_P30805	-0.285555	12.9769	-2.78381	0.0133521	0.336612	1
ENSG00000197238	HIST1H4B	H4_HUMAN	P62805	A_23_P30805	-0.285555	12.9769	-2.78381	0.0133521	0.336612	1
ENSG00000197238	HIST1H4C	H4_HUMAN	P62805	A_23_P30805	-0.285555	12.9769	-2.78381	0.0133521	0.336612	1
ENSG00000197238	HIST1H4D	H4_HUMAN	P62805	A_23_P30805	-0.285555	12.9769	-2.78381	0.0133521	0.336612	1
ENSG00000197238	HIST1H4E	H4_HUMAN	P62805	A_23_P30805	-0.285555	12.9769	-2.78381	0.0133521	0.336612	1
ENSG00000197238	HIST1H4F	H4_HUMAN	P62805	A_23_P30805	-0.285555	12.9769	-2.78381	0.0133521	0.336612	1
ENSG00000197238	HIST1H4H	H4_HUMAN	P62805	A_23_P30805	-0.285555	12.9769	-2.78381	0.0133521	0.336612	1
ENSG00000197238	HIST1H4I	H4_HUMAN	P62805	A_23_P30805	-0.285555	12.9769	-2.78381	0.0133521	0.336612	1
ENSG00000197238	HIST1H4J	H4_HUMAN	P62805	A_23_P30805	-0.285555	12.9769	-2.78381	0.0133521	0.336612	1
ENSG00000197238	HIST1H4K	H4_HUMAN	P62805	A_23_P30805	-0.285555	12.9769	-2.78381	0.0133521	0.336612	1
ENSG00000197238	HIST1H4L	H4_HUMAN	P62805	A_23_P30805	-0.285555	12.9769	-2.78381	0.0133521	0.336612	1
ENSG00000197238	HIST2H4A	H4_HUMAN	P62805	A_23_P30805	-0.285555	12.9769	-2.78381	0.0133521	0.336612	1
ENSG00000197238	HIST2H4B	H4_HUMAN	P62805	A_23_P30805	-0.285555	12.9769	-2.78381	0.0133521	0.336612	1
ENSG00000197238	HIST4H4	H4_HUMAN	P62805	A_23_P30805	-0.285555	12.9769	-2.78381	0.0133521	0.336612	1
ENSG00000273542	HIST1H4A	H4_HUMAN	P62805	A_23_P30805	-0.285555	12.9769	-2.78381	0.0133521	0.336612	1
ENSG00000273542	HIST1H4B	H4_HUMAN	P62805	A_23_P30805	-0.285555	12.9769	-2.78381	0.0133521	0.336612	1
ENSG00000273542	HIST1H4C	H4_HUMAN	P62805	A_23_P30805	-0.285555	12.9769	-2.78381	0.0133521	0.336612	1
ENSG00000273542	HIST1H4D	H4_HUMAN	P62805	A_23_P30805	-0.285555	12.9769	-2.78381	0.0133521	0.336612	1
ENSG00000273542	HIST1H4E	H4_HUMAN	P62805	A_23_P30805	-0.285555	12.9769	-2.78381	0.0133521	0.336612	1
ENSG00000273542	HIST1H4F	H4_HUMAN	P62805	A_23_P30805	-0.285555	12.9769	-2.78381	0.0133521	0.336612	1
ENSG00000273542	HIST1H4H	H4_HUMAN	P62805	A_23_P30805	-0.285555	12.9769	-2.78381	0.0133521	0.336612	1
ENSG00000273542	HIST1H4I	H4_HUMAN	P62805	A_23_P30805	-0.285555	12.9769	-2.78381	0.0133521	0.336612	1
ENSG00000273542	HIST1H4J	H4_HUMAN	P62805	A_23_P30805	-0.285555	12.9769	-2.78381	0.0133521	0.336612	1
ENSG00000273542	HIST1H4K	H4_HUMAN	P62805	A_23_P30805	-0.285555	12.9769	-2.78381	0.0133521	0.336612	1
ENSG00000273542	HIST1H4L	H4_HUMAN	P62805	A_23_P30805	-0.285555	12.9769	-2.78381	0.0133521	0.336612	1
ENSG00000273542	HIST2H4A	H4_HUMAN	P62805	A_23_P30805	-0.285555	12.9769	-2.78381	0.0133521	0.336612	1
ENSG00000273542	HIST2H4B	H4_HUMAN	P62805	A_23_P30805	-0.285555	12.9769	-2.78381	0.0133521	0.336612	1
ENSG00000273542	HIST4H4	H4_HUMAN	P62805	A_23_P30805	-0.285555	12.9769	-2.78381	0.0133521	0.336612	1
ENSG00000237493	-	-	-	A_23_P46369	-0.185114	11.0784	-2.78372	0.0133545	0.336612	1
ENSG00000143545	RAB13	RAB13_HUMAN	P51153	A_23_P46369	-0.185114	11.0784	-2.78372	0.0133545	0.336612	1
ENSG00000259580	-	-	-	A_23_P37676	-0.312108	8.85128	-2.7834	0.0133635	0.336612	1
ENSG00000166073	GPR176	GP176_HUMAN	Q14439	A_23_P37676	-0.312108	8.85128	-2.7834	0.0133635	0.336612	1
ENSG00000203710	CR1	CR1_HUMAN	P17927	A_23_P256821	0.203659	7.04056	2.78321	0.0133685	0.336612	1
ENSG00000197721	CR1L	CR1L_HUMAN	Q2VPA4	A_23_P256821	0.203659	7.04056	2.78321	0.0133685	0.336612	1
ENSG00000130520	LSM4	LSM4_HUMAN	Q9Y4Z0	A_24_P224776	-0.245614	12.8617	-2.78193	0.0134039	0.337114	1
ENSG00000131503	ANKHD1	ANKH1_HUMAN	Q8IWZ3	A_23_P213326	0.249197	10.4882	2.78131	0.0134209	0.337114	1
ENSG00000254996	ANKHD1-EIF4EBP3	-	-	A_23_P213326	0.249197	10.4882	2.78131	0.0134209	0.337114	1
ENSG00000088992	TESC	CHP3_HUMAN	Q96BS2	A_23_P76538	0.25313	12.6785	2.78122	0.0134235	0.337114	1
ENSG00000092621	PHGDH	SERA_HUMAN	O43175	A_23_P85783	-0.24689	13.8057	-2.78105	0.0134279	0.337114	1
ENSG00000141101	NOB1	NOB1_HUMAN	Q9ULX3	A_24_P516215	-0.219977	9.99226	-2.7807	0.0134376	0.337114	1
ENSG00000248795	-	-	-	A_24_P516215	-0.219977	9.99226	-2.7807	0.0134376	0.337114	1
ENSG00000125998	FAM83C	FA83C_HUMAN	Q9BQN1	A_23_P409888	-0.246194	6.9798	-2.78035	0.0134474	0.337152	1
ENSG00000164091	WDR82	WDR82_HUMAN	Q6UXN9	A_23_P109877	-0.19713	10.1429	-2.7797	0.0134655	0.337401	1
ENSG00000014138	POLA2	DPOA2_HUMAN	Q14181	A_23_P161615	-0.183903	9.97848	-2.77871	0.0134928	0.337418	1
ENSG00000154764	WNT7A	WNT7A_HUMAN	O00755	A_23_P258410	0.300881	6.97815	2.77841	0.0135011	0.337418	1
ENSG00000198092	TMPRSS11F	TM11F_HUMAN	Q6ZWK6	A_24_P411515	-0.310166	6.92232	-2.7781	0.0135096	0.337418	1
ENSG00000228002	-	-	-	A_24_P808534	-0.192325	9.28723	-2.77751	0.0135261	0.337418	1
ENSG00000166750	SLFN5	SLFN5_HUMAN	Q08AF3	A_23_P402899	0.200062	7.43218	2.77739	0.0135295	0.337418	1
ENSG00000159131	GART	PUR2_HUMAN	P22102	A_23_P80098	-0.280026	12.4131	-2.77737	0.0135299	0.337418	1
ENSG00000105699	LSR	LSR_HUMAN	Q86X29	A_23_P142389	-0.190107	10.9841	-2.7773	0.0135319	0.337418	1
ENSG00000251158	-	-	-	A_24_P204697	0.185979	7.12426	2.77691	0.0135426	0.337482	1
ENSG00000254133	-	-	-	A_24_P204697	0.185979	7.12426	2.77691	0.0135426	0.337482	1
ENSG00000254276	-	-	-	A_24_P204697	0.185979	7.12426	2.77691	0.0135426	0.337482	1
ENSG00000215156	-	-	-	A_24_P204697	0.185979	7.12426	2.77691	0.0135426	0.337482	1
ENSG00000251007	-	-	-	A_24_P204697	0.185979	7.12426	2.77691	0.0135426	0.337482	1
ENSG00000250867	-	-	-	A_24_P204697	0.185979	7.12426	2.77691	0.0135426	0.337482	1
ENSG00000248769	-	-	-	A_24_P204697	0.185979	7.12426	2.77691	0.0135426	0.337482	1
ENSG00000237075	-	-	-	A_24_P204697	0.185979	7.12426	2.77691	0.0135426	0.337482	1
ENSG00000250918	-	-	-	A_24_P204697	0.185979	7.12426	2.77691	0.0135426	0.337482	1
ENSG00000205565	-	-	-	A_24_P204697	0.185979	7.12426	2.77691	0.0135426	0.337482	1
ENSG00000169217	CD2BP2	CD2B2_HUMAN	O95400	A_24_P236522	-0.20712	10.5344	-2.77614	0.0135642	0.337609	1
ENSG00000099795	NDUFB7	NDUB7_HUMAN	P17568	A_24_P14434	0.239335	14.1271	2.77495	0.0135974	0.337978	1
ENSG00000152332	-	-	-	A_23_P342067	0.214899	9.634	2.77409	0.0136215	0.338157	1
ENSG00000154548	SRSF12	SRS12_HUMAN	Q8WXF0	A_23_P110903	0.215637	9.4862	2.77325	0.0136449	0.338157	1
ENSG00000139266	39873	MARH9_HUMAN	Q86YJ5	A_23_P47777	0.231318	10.8584	2.77322	0.0136459	0.338157	1
ENSG00000173572	NLRP13	NAL13_HUMAN	Q86W25	A_23_P399834	-0.255893	7.05907	-2.77287	0.0136557	0.338157	1
ENSG00000128645	HOXD1	HXD1_HUMAN	Q9GZZ0	A_23_P120243	-0.170171	6.91097	-2.77245	0.0136674	0.338157	1
ENSG00000213740	-	-	-	A_32_P139079	-0.23248	14.7415	-2.77167	0.0136894	0.338157	1
ENSG00000142864	SERBP1	PAIRB_HUMAN	Q8NC51	A_32_P139079	-0.23248	14.7415	-2.77167	0.0136894	0.338157	1
ENSG00000148154	UGCG	CEGT_HUMAN	Q16739	A_23_P123645	-0.33105	9.54205	-2.77153	0.0136932	0.338157	1
ENSG00000235434	-	-	-	A_32_P37225	-0.221081	6.98279	-2.77114	0.0137042	0.338226	1
ENSG00000143367	TUFT1	TUFT1_HUMAN	Q9NNX1	A_23_P371824	0.204739	11.968	2.77067	0.0137174	0.338349	1
ENSG00000031081	ARHGAP31	RHG31_HUMAN	Q2M1Z3	A_32_P226620	-0.266014	7.03949	-2.76961	0.0137472	0.33888	1
ENSG00000138463	DIRC2	DIRC2_HUMAN	Q96SL1	A_23_P80778	0.211929	11.0826	2.76777	0.0137994	0.339721	1
ENSG00000277775	HIST1H3A	H31_HUMAN	P68431	A_23_P30799	-0.299262	12.3955	-2.76746	0.0138082	0.339721	1
ENSG00000277775	HIST1H3B	H31_HUMAN	P68431	A_23_P30799	-0.299262	12.3955	-2.76746	0.0138082	0.339721	1
ENSG00000277775	HIST1H3C	H31_HUMAN	P68431	A_23_P30799	-0.299262	12.3955	-2.76746	0.0138082	0.339721	1
ENSG00000277775	HIST1H3D	H31_HUMAN	P68431	A_23_P30799	-0.299262	12.3955	-2.76746	0.0138082	0.339721	1
ENSG00000277775	HIST1H3E	H31_HUMAN	P68431	A_23_P30799	-0.299262	12.3955	-2.76746	0.0138082	0.339721	1
ENSG00000277775	HIST1H3F	H31_HUMAN	P68431	A_23_P30799	-0.299262	12.3955	-2.76746	0.0138082	0.339721	1
ENSG00000277775	HIST1H3G	H31_HUMAN	P68431	A_23_P30799	-0.299262	12.3955	-2.76746	0.0138082	0.339721	1
ENSG00000277775	HIST1H3H	H31_HUMAN	P68431	A_23_P30799	-0.299262	12.3955	-2.76746	0.0138082	0.339721	1
ENSG00000277775	HIST1H3I	H31_HUMAN	P68431	A_23_P30799	-0.299262	12.3955	-2.76746	0.0138082	0.339721	1
ENSG00000277775	HIST1H3J	H31_HUMAN	P68431	A_23_P30799	-0.299262	12.3955	-2.76746	0.0138082	0.339721	1
ENSG00000069966	GNB5	GBB5_HUMAN	O14775	A_24_P911571	0.208384	7.37166	2.76724	0.0138144	0.339721	1
ENSG00000117676	RPS6KA1	KS6A1_HUMAN	Q15418	A_24_P396650	-0.206319	9.5391	-2.76681	0.0138265	0.339736	1
ENSG00000174792	C4orf26	CD026_HUMAN	Q17RF5	A_23_P386268	0.193285	7.09252	2.76664	0.0138315	0.339736	1
ENSG00000158716	DUSP23	DUS23_HUMAN	Q9BVJ7	A_23_P103232	-0.18671	12.9841	-2.76544	0.0138654	0.339929	1
ENSG00000162976	PQLC3	PQLC3_HUMAN	Q8N755	A_23_P131375	0.209156	10.8952	2.76536	0.0138677	0.339929	1
ENSG00000065882	TBC1D1	TBCD1_HUMAN	Q86TI0	A_23_P73023	-0.254136	11.1194	-2.76523	0.0138716	0.339929	1
ENSG00000182230	FAM153B	F153B_HUMAN	P0C7A2	A_32_P84373	0.195737	6.92316	2.7652	0.0138725	0.339929	1
ENSG00000170074	FAM153A	F153A_HUMAN	Q9UHL3	A_32_P84373	0.195737	6.92316	2.7652	0.0138725	0.339929	1
ENSG00000204677	FAM153C	F153C_HUMAN	Q494X1	A_32_P84373	0.195737	6.92316	2.7652	0.0138725	0.339929	1
ENSG00000226284	-	-	-	A_23_P28797	0.185853	12.9627	2.76466	0.0138877	0.3401	1
ENSG00000144381	HSPD1	CH60_HUMAN	P10809	A_32_P76091	-0.369114	11.3562	-2.76396	0.0139077	0.340185	1
ENSG00000164736	SOX17	SOX17_HUMAN	Q9H6I2	A_23_P82775	0.191524	15.3668	2.76328	0.0139271	0.340444	1
ENSG00000163959	SLC51A	OSTA_HUMAN	Q86UW1	A_23_P40761	-0.243539	7.54831	-2.76236	0.0139536	0.340444	1
ENSG00000076662	ICAM3	ICAM3_HUMAN	P32942	A_23_P164691	-0.228079	10.7453	-2.76206	0.013962	0.340444	1
ENSG00000182351	-	-	-	A_24_P110601	0.213645	10.8644	2.76113	0.0139887	0.340444	1
ENSG00000137501	SYTL2	SYTL2_HUMAN	Q9HCH5	A_23_P53193	-0.388371	8.37078	-2.76096	0.0139937	0.340444	1
ENSG00000203710	CR1	CR1_HUMAN	P17927	A_24_P265523	0.208285	7.05299	2.76062	0.0140033	0.340444	1
ENSG00000275379	HIST1H3A	H31_HUMAN	P68431	A_24_P9321	-0.185686	9.62328	-2.75985	0.0140256	0.340444	1
ENSG00000275379	HIST1H3B	H31_HUMAN	P68431	A_24_P9321	-0.185686	9.62328	-2.75985	0.0140256	0.340444	1
ENSG00000275379	HIST1H3C	H31_HUMAN	P68431	A_24_P9321	-0.185686	9.62328	-2.75985	0.0140256	0.340444	1
ENSG00000275379	HIST1H3D	H31_HUMAN	P68431	A_24_P9321	-0.185686	9.62328	-2.75985	0.0140256	0.340444	1
ENSG00000275379	HIST1H3E	H31_HUMAN	P68431	A_24_P9321	-0.185686	9.62328	-2.75985	0.0140256	0.340444	1
ENSG00000275379	HIST1H3F	H31_HUMAN	P68431	A_24_P9321	-0.185686	9.62328	-2.75985	0.0140256	0.340444	1
ENSG00000275379	HIST1H3G	H31_HUMAN	P68431	A_24_P9321	-0.185686	9.62328	-2.75985	0.0140256	0.340444	1
ENSG00000275379	HIST1H3H	H31_HUMAN	P68431	A_24_P9321	-0.185686	9.62328	-2.75985	0.0140256	0.340444	1
ENSG00000275379	HIST1H3I	H31_HUMAN	P68431	A_24_P9321	-0.185686	9.62328	-2.75985	0.0140256	0.340444	1
ENSG00000275379	HIST1H3J	H31_HUMAN	P68431	A_24_P9321	-0.185686	9.62328	-2.75985	0.0140256	0.340444	1
ENSG00000178172	SPINK6	ISK6_HUMAN	Q6UWN8	A_23_P92909	0.337252	7.02275	2.75984	0.0140259	0.340444	1
ENSG00000130304	SLC27A1	S27A1_HUMAN	Q6PCB7	A_24_P382489	0.260761	10.7336	2.7597	0.0140298	0.340444	1
ENSG00000123353	ORMDL2	ORML2_HUMAN	Q53FV1	A_23_P87500	0.209109	13.6866	2.75951	0.0140353	0.340444	1
ENSG00000005059	CCDC109B	MCUB_HUMAN	Q9NWR8	A_23_P255376	-0.351271	9.10153	-2.75925	0.0140428	0.340444	1
ENSG00000047249	ATP6V1H	VATH_HUMAN	Q9UI12	A_23_P157478	0.195829	12.381	2.7592	0.0140441	0.340444	1
ENSG00000115806	GORASP2	GORS2_HUMAN	Q9H8Y8	A_24_P328320	-0.211293	8.10855	-2.7589	0.0140529	0.340444	1
ENSG00000146938	NLGN4X	NLGNX_HUMAN	Q8N0W4	A_23_P364592	-0.295674	8.99965	-2.75856	0.0140627	0.340444	1
ENSG00000181322	NME9	TXND6_HUMAN	Q86XW9	A_23_P212675	-0.241861	7.21769	-2.75844	0.014066	0.340444	1
ENSG00000181322	TXNDC6	TXND6_HUMAN	Q86XW9	A_23_P212675	-0.241861	7.21769	-2.75844	0.014066	0.340444	1
ENSG00000127022	CANX	CALX_HUMAN	P27824	A_24_P345993	0.209429	9.74486	2.75836	0.0140683	0.340444	1
ENSG00000025770	NCAPH2	CNDH2_HUMAN	Q6IBW4	A_23_P369960	-0.229513	8.84971	-2.7577	0.0140874	0.340444	1
ENSG00000149527	PLCH2	PLCH2_HUMAN	O75038	A_24_P372833	0.284514	7.02813	2.75769	0.0140877	0.340444	1
ENSG00000233482	-	-	-	A_24_P929246	-0.275655	6.99687	-2.75685	0.014112	0.340444	1
ENSG00000161671	EMC10	EMC10_HUMAN	Q5UCC4	A_23_P208674	0.264235	13.1826	2.75625	0.0141295	0.340444	1
ENSG00000140443	IGF1R	IGF1R_HUMAN	P08069	A_23_P205986	-0.272825	8.73182	-2.75621	0.0141307	0.340444	1
ENSG00000111536	IL26	IL26_HUMAN	Q9NPH9	A_23_P128503	0.164182	7.18862	2.75605	0.0141352	0.340444	1
ENSG00000105568	PPP2R1A	2AAA_HUMAN	P30153	A_23_P107661	-0.19988	12.2518	-2.75601	0.0141365	0.340444	1
ENSG00000182087	TMEM259	MBRL_HUMAN	Q4ZIN3	A_23_P90369	0.218341	12.9597	2.75573	0.0141446	0.340444	1
ENSG00000237289	CKMT1A	KCRU_HUMAN	P12532	A_23_P163227	-0.383117	10.7421	-2.75486	0.0141698	0.340444	1
ENSG00000237289	CKMT1B	KCRU_HUMAN	P12532	A_23_P163227	-0.383117	10.7421	-2.75486	0.0141698	0.340444	1
ENSG00000223572	CKMT1A	KCRU_HUMAN	P12532	A_23_P163227	-0.383117	10.7421	-2.75486	0.0141698	0.340444	1
ENSG00000223572	CKMT1B	KCRU_HUMAN	P12532	A_23_P163227	-0.383117	10.7421	-2.75486	0.0141698	0.340444	1
ENSG00000212128	TAS2R13	T2R13_HUMAN	Q9NYV9	A_23_P99080	-0.178905	7.01078	-2.75465	0.0141758	0.340444	1
ENSG00000234350	-	-	-	A_24_P579524	0.216813	6.93999	2.75443	0.0141824	0.340444	1
ENSG00000231437	-	-	-	A_32_P225135	0.195455	7.05442	2.75373	0.0142027	0.340444	1
ENSG00000158887	MPZ	MYP0_HUMAN	P25189	A_23_P138089	-0.264224	7.19197	-2.75344	0.0142112	0.340444	1
ENSG00000102804	TSC22D1	T22D1_HUMAN	Q15714	A_23_P162739	-0.241165	9.5397	-2.75325	0.0142166	0.340444	1
ENSG00000185129	PURA	PURA_HUMAN	Q00577	A_24_P97785	0.220988	8.04517	2.75281	0.0142295	0.340555	1
ENSG00000135047	CTSL	CATL1_HUMAN	P07711	A_23_P94533	0.27216	14.772	2.75238	0.0142421	0.340658	1
ENSG00000180104	EXOC3	EXOC3_HUMAN	O60645	A_23_P389676	0.246792	7.9848	2.75164	0.0142636	0.340974	1
ENSG00000151332	MBIP	MBIP1_HUMAN	Q9NS73	A_23_P2922	0.20669	10.4376	2.75069	0.0142914	0.341378	1
ENSG00000219201	-	-	-	A_32_P182662	0.194638	9.99978	2.7505	0.0142971	0.341378	1
ENSG00000186063	AIDA	AIDA_HUMAN	Q96BJ3	A_32_P182662	0.194638	9.99978	2.7505	0.0142971	0.341378	1
ENSG00000230154	-	-	-	A_32_P182662	0.194638	9.99978	2.7505	0.0142971	0.341378	1
ENSG00000251429	-	-	-	A_32_P182662	0.194638	9.99978	2.7505	0.0142971	0.341378	1
ENSG00000147050	KDM6A	KDM6A_HUMAN	O15550	A_23_P217304	0.198419	11.5939	2.75003	0.0143109	0.341386	1
ENSG00000225423	-	-	-	A_32_P99097	-0.208577	13.306	-2.74992	0.0143141	0.341386	1
ENSG00000125285	SOX21	SOX21_HUMAN	Q9Y651	A_23_P379089	-0.180032	7.63921	-2.74908	0.0143387	0.341774	1
ENSG00000104213	PDGFRL	PGFRL_HUMAN	Q15198	A_23_P60146	0.183843	9.09187	2.74827	0.0143627	0.342148	1
ENSG00000135063	FAM189A2	F1892_HUMAN	Q15884	A_32_P43717	-0.268303	8.3944	-2.74793	0.0143727	0.342188	1
ENSG00000168887	C2orf68	CB068_HUMAN	Q2NKX9	A_32_P36046	0.223326	8.20459	2.74622	0.0144229	0.342789	1
ENSG00000145495	38777	MARH6_HUMAN	O60337	A_23_P110492	0.212141	10.7698	2.74546	0.0144454	0.342927	1
ENSG00000164122	ASB5	ASB5_HUMAN	Q8WWX0	A_23_P144326	0.339254	9.70553	2.74314	0.0145143	0.343766	1
ENSG00000153989	NUS1	NGBR_HUMAN	Q96E22	A_23_P93082	-0.198955	9.75574	-2.74232	0.0145388	0.344149	1
ENSG00000235636	-	-	-	A_23_P93082	-0.198955	9.75574	-2.74232	0.0145388	0.344149	1
ENSG00000172239	PAIP1	PAIP1_HUMAN	Q9H074	A_24_P77681	0.208072	11.1051	2.74189	0.0145517	0.344237	1
ENSG00000174977	-	-	-	A_24_P77681	0.208072	11.1051	2.74189	0.0145517	0.344237	1
ENSG00000005981	ASB4	ASB4_HUMAN	Q9Y574	A_23_P157205	0.179626	7.86936	2.74133	0.0145685	0.344237	1
ENSG00000147724	FAM135B	F135B_HUMAN	Q49AJ0	A_32_P68097	0.321274	7.99906	2.74111	0.0145748	0.344237	1
ENSG00000163617	KIAA1407	K1407_HUMAN	Q8NCU4	A_23_P419213	0.283125	7.70054	2.74094	0.0145798	0.344237	1
ENSG00000228874	-	-	-	A_32_P159535	0.200433	8.26541	2.74079	0.0145844	0.344237	1
ENSG00000169045	HNRNPH1	HNRH1_HUMAN	P31943	A_24_P337380	-0.252956	10.9681	-2.74038	0.0145966	0.344244	1
ENSG00000108424	KPNB1	IMB1_HUMAN	Q14974	A_23_P118774	-0.298038	12.9382	-2.73905	0.0146365	0.344305	1
ENSG00000140832	MARVELD3	MALD3_HUMAN	Q96A59	A_23_P152428	-0.293219	8.38889	-2.73887	0.0146418	0.344305	1
ENSG00000174963	ZIC4	ZIC4_HUMAN	Q8N9L1	A_24_P217306	0.194111	7.05468	2.73768	0.0146776	0.344305	1
ENSG00000151093	OXSM	OXSM_HUMAN	Q9NWU1	A_23_P132486	0.182862	9.16644	2.73705	0.0146966	0.344305	1
ENSG00000263829	-	-	-	A_23_P13663	-0.226149	14.5362	-2.73693	0.0147003	0.344305	1
ENSG00000139146	FAM60A	FA60A_HUMAN	Q9NP50	A_23_P13663	-0.226149	14.5362	-2.73693	0.0147003	0.344305	1
ENSG00000267742	-	-	-	A_23_P13663	-0.226149	14.5362	-2.73693	0.0147003	0.344305	1
ENSG00000162543	UBXN10	UBX10_HUMAN	Q96LJ8	A_24_P942921	0.328776	7.0707	2.73676	0.0147052	0.344305	1
ENSG00000244405	ETV5	ETV5_HUMAN	P41161	A_23_P9836	-0.188988	8.96752	-2.73621	0.0147219	0.344305	1
ENSG00000115541	HSPE1	CH10_HUMAN	P61604	A_23_P56922	-0.205217	15.8011	-2.7361	0.0147253	0.344305	1
ENSG00000217897	-	-	-	A_23_P56922	-0.205217	15.8011	-2.7361	0.0147253	0.344305	1
ENSG00000258153	-	-	-	A_23_P56922	-0.205217	15.8011	-2.7361	0.0147253	0.344305	1
ENSG00000232917	-	-	-	A_23_P56922	-0.205217	15.8011	-2.7361	0.0147253	0.344305	1
ENSG00000259746	-	-	-	A_23_P56922	-0.205217	15.8011	-2.7361	0.0147253	0.344305	1
ENSG00000147180	ZNF711	ZN711_HUMAN	Q9Y462	A_23_P340148	0.238749	7.85226	2.73608	0.0147259	0.344305	1
ENSG00000189377	CXCL17	VCC1_HUMAN	Q6UXB2	A_23_P50269	0.223253	7.1688	2.73572	0.0147366	0.344305	1
ENSG00000213988	ZNF90	ZNF90_HUMAN	Q03938	A_32_P790361	-0.201265	8.20987	-2.73551	0.0147429	0.344305	1
ENSG00000106554	CHCHD3	MIC19_HUMAN	Q9NX63	A_23_P251927	-0.265369	11.3475	-2.73544	0.0147451	0.344305	1
ENSG00000138111	TMEM180	TM180_HUMAN	Q14CX5	A_23_P337729	-0.28315	9.67102	-2.73506	0.0147566	0.344305	1
ENSG00000110799	VWF	VWF_HUMAN	P04275	A_23_P105562	0.260339	13.8345	2.73424	0.0147816	0.344305	1
ENSG00000229847	-	-	-	A_24_P892472	0.256843	7.00194	2.7337	0.0147978	0.344305	1
ENSG00000143224	PPOX	PPOX_HUMAN	P50336	A_23_P201400	0.178856	11.6466	2.73352	0.0148031	0.344305	1
ENSG00000004478	FKBP4	FKBP4_HUMAN	Q02790	A_32_P71788	-0.261293	9.64847	-2.73352	0.0148031	0.344305	1
ENSG00000166188	ZNF319	ZN319_HUMAN	Q9P2F9	A_23_P26314	0.209203	8.17884	2.73334	0.0148087	0.344305	1
ENSG00000237118	-	-	-	A_23_P89981	-0.185354	7.35512	-2.73274	0.014827	0.344305	1
ENSG00000197446	CYP2F1	CP2F1_HUMAN	P24903	A_23_P89981	-0.185354	7.35512	-2.73274	0.014827	0.344305	1
ENSG00000166171	DPCD	DPCD_HUMAN	Q9BVM2	A_23_P52286	0.181011	11.3779	2.73259	0.0148315	0.344305	1
ENSG00000124098	FAM210B	F210B_HUMAN	Q96KR6	A_24_P399680	0.188857	10.7382	2.73254	0.0148332	0.344305	1
ENSG00000133111	RFXAP	RFXAP_HUMAN	O00287	A_23_P315789	0.288191	8.81992	2.73245	0.0148359	0.344305	1
ENSG00000127955	GNAI1	GNAI1_HUMAN	P63096	A_23_P122976	0.23792	9.1868	2.73233	0.0148393	0.344305	1
ENSG00000171604	CXXC5	CXXC5_HUMAN	Q7LFL8	A_23_P399001	-0.340684	12.297	-2.73224	0.0148421	0.344305	1
ENSG00000250021	C15orf38-AP3S2	-	-	A_23_P106425	0.209654	7.31343	2.73208	0.014847	0.344305	1
ENSG00000242498	ARPIN	ARPIN_HUMAN	Q7Z6K5	A_23_P106425	0.209654	7.31343	2.73208	0.014847	0.344305	1
ENSG00000249087	ZNF436-AS1	CA213_HUMAN	Q8NC38	A_23_P362228	0.349697	9.37371	2.73092	0.0148822	0.344586	1
ENSG00000107614	DKFZp686N1286	TRDMT_HUMAN	O14717	A_32_P21579	-0.212666	7.21179	-2.7304	0.014898	0.344586	1
ENSG00000107614	TRDMT1	TRDMT_HUMAN	O14717	A_32_P21579	-0.212666	7.21179	-2.7304	0.014898	0.344586	1
ENSG00000160882	CYP11B1	C11B1_HUMAN	P15538	A_24_P329424	0.236035	6.94922	2.72943	0.0149279	0.344586	1
ENSG00000127528	KLF2	KLF2_HUMAN	Q9Y5W3	A_23_P119196	0.240086	7.68843	2.72935	0.0149302	0.344586	1
ENSG00000256164	-	-	-	A_32_P73991	0.188665	7.63408	2.72898	0.0149415	0.344586	1
ENSG00000278662	GOLGA6L10	-	-	A_32_P231086	0.277339	9.083	2.72889	0.0149443	0.344586	1
ENSG00000197978	GOLGA6L9	GG6L9_HUMAN	A6NEM1	A_32_P231086	0.277339	9.083	2.72889	0.0149443	0.344586	1
ENSG00000184206	GOLGA6L4	GG6L4_HUMAN	A6NEF3	A_32_P231086	0.277339	9.083	2.72889	0.0149443	0.344586	1
ENSG00000230373	-	-	-	A_32_P231086	0.277339	9.083	2.72889	0.0149443	0.344586	1
ENSG00000130164	LDLR	LDLR_HUMAN	P01130	A_23_P208595	-0.340313	9.99552	-2.72888	0.0149445	0.344586	1
ENSG00000113083	LOX	LYOX_HUMAN	P28300	A_24_P37903	0.215675	7.63974	2.72883	0.0149463	0.344586	1
ENSG00000162139	NEU3	NEUR3_HUMAN	Q9UQ49	A_32_P125820	-0.229992	9.9166	-2.72797	0.0149726	0.344586	1
ENSG00000173421	CCDC36	CCD36_HUMAN	Q8IYA8	A_23_P362770	0.26725	7.12371	2.72793	0.0149736	0.344586	1
ENSG00000178202	KDELC2	KDEL2_HUMAN	Q7Z4H8	A_23_P388200	-0.243119	7.6301	-2.72754	0.0149855	0.344586	1
ENSG00000148803	FUOM	FUCM_HUMAN	A2VDF0	A_23_P97952	0.232661	14.1868	2.72749	0.0149872	0.344586	1
ENSG00000241476	SSX2	SSX2_HUMAN	Q16385	A_23_P33881	0.298538	11.2994	2.72719	0.0149963	0.344586	1
ENSG00000241476	SSX2B	SSX2_HUMAN	Q16385	A_23_P33881	0.298538	11.2994	2.72719	0.0149963	0.344586	1
ENSG00000268447	SSX2	SSX2_HUMAN	Q16385	A_23_P33881	0.298538	11.2994	2.72719	0.0149963	0.344586	1
ENSG00000268447	SSX2B	SSX2_HUMAN	Q16385	A_23_P33881	0.298538	11.2994	2.72719	0.0149963	0.344586	1
ENSG00000227302	-	-	-	A_23_P33881	0.298538	11.2994	2.72719	0.0149963	0.344586	1
ENSG00000171483	SSX6	SSX6_HUMAN	Q7RTT6	A_23_P33881	0.298538	11.2994	2.72719	0.0149963	0.344586	1
ENSG00000268009	SSX4	SSX4_HUMAN	O60224	A_23_P33881	0.298538	11.2994	2.72719	0.0149963	0.344586	1
ENSG00000268009	SSX4B	SSX4_HUMAN	O60224	A_23_P33881	0.298538	11.2994	2.72719	0.0149963	0.344586	1
ENSG00000269791	SSX4	SSX4_HUMAN	O60224	A_23_P33881	0.298538	11.2994	2.72719	0.0149963	0.344586	1
ENSG00000269791	SSX4B	SSX4_HUMAN	O60224	A_23_P33881	0.298538	11.2994	2.72719	0.0149963	0.344586	1
ENSG00000165699	TSC1	TSC1_HUMAN	Q92574	A_24_P329635	0.214077	9.83737	2.72702	0.0150017	0.344586	1
ENSG00000156162	DPY19L4	D19L4_HUMAN	Q7Z388	A_32_P196047	0.195811	9.37072	2.7269	0.0150053	0.344586	1
ENSG00000145832	SLC25A48	S2548_HUMAN	Q6ZT89	A_23_P424051	0.173807	7.64844	2.72627	0.0150247	0.344586	1
ENSG00000241244	-	-	-	A_23_P361654	0.324567	6.99018	2.72626	0.0150251	0.344586	1
ENSG00000164292	RHOBTB3	RHBT3_HUMAN	O94955	A_23_P92710	0.282016	11.4648	2.72606	0.015031	0.344586	1
ENSG00000123213	NLN	NEUL_HUMAN	Q9BYT8	A_32_P891680	-0.222419	7.49349	-2.72573	0.0150413	0.344586	1
ENSG00000224075	-	-	-	A_24_P331693	0.263676	6.97042	2.72535	0.0150528	0.344586	1
ENSG00000204531	POU5F1	PO5F1_HUMAN	Q01860	A_24_P214841	-0.381018	14.0781	-2.72466	0.0150741	0.344586	1
ENSG00000206454	POU5F1	PO5F1_HUMAN	Q01860	A_24_P214841	-0.381018	14.0781	-2.72466	0.0150741	0.344586	1
ENSG00000235068	POU5F1	PO5F1_HUMAN	Q01860	A_24_P214841	-0.381018	14.0781	-2.72466	0.0150741	0.344586	1
ENSG00000212993	POU5F1B	P5F1B_HUMAN	Q06416	A_24_P214841	-0.381018	14.0781	-2.72466	0.0150741	0.344586	1
ENSG00000235602	-	-	-	A_24_P214841	-0.381018	14.0781	-2.72466	0.0150741	0.344586	1
ENSG00000229094	POU5F1	PO5F1_HUMAN	Q01860	A_24_P214841	-0.381018	14.0781	-2.72466	0.0150741	0.344586	1
ENSG00000237582	POU5F1	PO5F1_HUMAN	Q01860	A_24_P214841	-0.381018	14.0781	-2.72466	0.0150741	0.344586	1
ENSG00000233911	POU5F1	PO5F1_HUMAN	Q01860	A_24_P214841	-0.381018	14.0781	-2.72466	0.0150741	0.344586	1
ENSG00000230336	POU5F1	PO5F1_HUMAN	Q01860	A_24_P214841	-0.381018	14.0781	-2.72466	0.0150741	0.344586	1
ENSG00000147789	ZNF7	ZNF7_HUMAN	P17097	A_23_P255805	0.207434	9.99315	2.72459	0.0150763	0.344586	1
ENSG00000196465	MYL6B	MYL6B_HUMAN	P14649	A_23_P344973	0.17298	17.3977	2.72447	0.0150801	0.344586	1
ENSG00000092841	MYL6	MYL6_HUMAN	P60660	A_23_P344973	0.17298	17.3977	2.72447	0.0150801	0.344586	1
ENSG00000158516	CPA2	CBPA2_HUMAN	P48052	A_23_P31161	0.188147	6.99631	2.72333	0.0151152	0.344586	1
ENSG00000141441	GAREM	GAREM_HUMAN	Q9H706	A_23_P66948	0.179516	9.40372	2.72318	0.0151201	0.344586	1
ENSG00000084774	CAD	PYR1_HUMAN	P27708	A_23_P40049	-0.299865	11.6075	-2.72208	0.015154	0.344586	1
ENSG00000106366	SERPINE1	PAI1_HUMAN	P05121	A_24_P158089	-0.219291	7.55085	-2.72207	0.0151544	0.344586	1
ENSG00000155849	ELMO1	ELMO1_HUMAN	Q92556	A_24_P72420	0.218104	7.62446	2.72116	0.0151825	0.344586	1
ENSG00000173432	SAA1	SAA1_HUMAN	P0DJI8	A_23_P75830	0.226595	6.97264	2.72106	0.0151857	0.344586	1
ENSG00000122778	KIAA1549	K1549_HUMAN	Q9HCM3	A_32_P103508	0.254846	8.2006	2.72102	0.0151868	0.344586	1
ENSG00000198554	WDHD1	WDHD1_HUMAN	O75717	A_32_P148602	-0.208964	7.35026	-2.72092	0.0151902	0.344586	1
ENSG00000151014	CCRN4L	NOCT_HUMAN	Q9UK39	A_23_P144337	-0.252397	7.34676	-2.72025	0.015211	0.344586	1
ENSG00000235618	-	-	-	A_24_P677642	0.206993	8.66327	2.71958	0.0152317	0.344586	1
ENSG00000130479	MAP1S	MAP1S_HUMAN	Q66K74	A_23_P67583	-0.26006	10.3296	-2.71901	0.0152495	0.344586	1
ENSG00000160551	TAOK1	TAOK1_HUMAN	Q7L7X3	A_24_P854964	-0.251406	10.3712	-2.71893	0.0152519	0.344586	1
ENSG00000197409	HIST1H3A	H31_HUMAN	P68431	A_24_P217834	-0.320352	13.5003	-2.71835	0.0152702	0.344586	1
ENSG00000197409	HIST1H3B	H31_HUMAN	P68431	A_24_P217834	-0.320352	13.5003	-2.71835	0.0152702	0.344586	1
ENSG00000197409	HIST1H3C	H31_HUMAN	P68431	A_24_P217834	-0.320352	13.5003	-2.71835	0.0152702	0.344586	1
ENSG00000197409	HIST1H3D	H31_HUMAN	P68431	A_24_P217834	-0.320352	13.5003	-2.71835	0.0152702	0.344586	1
ENSG00000197409	HIST1H3E	H31_HUMAN	P68431	A_24_P217834	-0.320352	13.5003	-2.71835	0.0152702	0.344586	1
ENSG00000197409	HIST1H3F	H31_HUMAN	P68431	A_24_P217834	-0.320352	13.5003	-2.71835	0.0152702	0.344586	1
ENSG00000197409	HIST1H3G	H31_HUMAN	P68431	A_24_P217834	-0.320352	13.5003	-2.71835	0.0152702	0.344586	1
ENSG00000197409	HIST1H3H	H31_HUMAN	P68431	A_24_P217834	-0.320352	13.5003	-2.71835	0.0152702	0.344586	1
ENSG00000197409	HIST1H3I	H31_HUMAN	P68431	A_24_P217834	-0.320352	13.5003	-2.71835	0.0152702	0.344586	1
ENSG00000197409	HIST1H3J	H31_HUMAN	P68431	A_24_P217834	-0.320352	13.5003	-2.71835	0.0152702	0.344586	1
ENSG00000188011	RTP5	RTP5_HUMAN	Q14D33	A_24_P197284	0.291959	7.00463	2.71783	0.0152865	0.344586	1
ENSG00000129946	SHC2	SHC2_HUMAN	P98077	A_32_P205624	0.288285	12.0509	2.71771	0.0152901	0.344586	1
ENSG00000104863	LIN7B	LIN7B_HUMAN	Q9HAP6	A_23_P164912	0.21376	9.40689	2.71745	0.0152983	0.344586	1
ENSG00000160345	C9orf116	CI116_HUMAN	Q5BN46	A_23_P422115	0.219516	10.3848	2.71691	0.0153152	0.344586	1
ENSG00000171815	PCDHB1	PCDB1_HUMAN	Q9Y5F3	A_23_P110462	0.281936	6.99823	2.71661	0.0153245	0.344586	1
ENSG00000100626	GALNT16	GLT16_HUMAN	Q8N428	A_23_P76749	0.242666	9.7062	2.71643	0.0153302	0.344586	1
ENSG00000184139	-	-	-	A_32_P74357	0.202732	13.0772	2.716	0.0153437	0.344586	1
ENSG00000110077	MS4A6A	M4A6A_HUMAN	Q9H2W1	A_23_P203376	-0.265644	6.90767	-2.71575	0.0153517	0.344586	1
ENSG00000173166	RAPH1	RAPH1_HUMAN	Q70E73	A_24_P929570	-0.326484	9.4993	-2.7152	0.015369	0.344586	1
ENSG00000157450	RNF111	RN111_HUMAN	Q6ZNA4	A_23_P77160	0.24189	9.8071	2.71514	0.0153708	0.344586	1
ENSG00000111752	PHC1	PHC1_HUMAN	P78364	A_23_P323094	-0.375755	9.35975	-2.71503	0.015374	0.344586	1
ENSG00000179899	-	-	-	A_23_P323094	-0.375755	9.35975	-2.71503	0.015374	0.344586	1
ENSG00000135447	PPP1R1A	PPR1A_HUMAN	Q13522	A_23_P53417	-0.21618	10.4182	-2.71494	0.0153769	0.344586	1
ENSG00000233975	-	-	-	A_32_P97149	-0.230731	7.11107	-2.71465	0.0153861	0.344586	1
ENSG00000256315	-	-	-	A_32_P70129	0.215599	7.14681	2.71377	0.0154137	0.344586	1
ENSG00000114353	GNAI2	GNAI2_HUMAN	P04899	A_23_P144113	-0.211743	11.5537	-2.71362	0.0154187	0.344586	1
ENSG00000056972	TRAF3IP2	CIKS_HUMAN	O43734	A_23_P110879	-0.214915	8.59206	-2.7136	0.0154192	0.344586	1
ENSG00000122378	FAM213A	F213A_HUMAN	Q9BRX8	A_23_P63660	0.175023	12.4612	2.71355	0.0154207	0.344586	1
ENSG00000169180	XPO6	XPO6_HUMAN	Q96QU8	A_23_P325438	-0.34303	9.9286	-2.71354	0.015421	0.344586	1
ENSG00000117724	CENPF	CENPF_HUMAN	P49454	A_24_P96780	-0.191849	8.4823	-2.71231	0.0154601	0.345136	1
ENSG00000279950	RPS4Y1	RS4Y1_HUMAN	P22090	A_23_P259314	0.248404	13.8728	2.71175	0.0154775	0.345136	1
ENSG00000129824	RPS4Y1	RS4Y1_HUMAN	P22090	A_23_P259314	0.248404	13.8728	2.71175	0.0154775	0.345136	1
ENSG00000144681	STAC	STAC_HUMAN	Q99469	A_23_P121061	-0.243603	7.29018	-2.71158	0.0154831	0.345136	1
ENSG00000180628	PCGF5	PCGF5_HUMAN	Q86SE9	A_24_P941699	0.208466	7.59365	2.71149	0.0154859	0.345136	1
ENSG00000160948	VPS28	VPS28_HUMAN	Q9UK41	A_23_P31903	0.210648	14.1954	2.71144	0.0154876	0.345136	1
ENSG00000126351	THRA	THA_HUMAN	P10827	A_23_P207742	-0.281933	10.0372	-2.711	0.0155016	0.345193	1
ENSG00000132823	OSER1	OSER1_HUMAN	Q9NX31	A_23_P79818	0.216565	11.2499	2.7108	0.0155076	0.345193	1
ENSG00000278817	DGCR6	DGCR6_HUMAN	Q14129	A_23_P143569	-0.210235	11.5295	-2.70935	0.0155538	0.345861	1
ENSG00000183628	DGCR6	DGCR6_HUMAN	Q14129	A_23_P143569	-0.210235	11.5295	-2.70935	0.0155538	0.345861	1
ENSG00000128185	DGCR6L	DGC6L_HUMAN	Q9BY27	A_23_P143569	-0.210235	11.5295	-2.70935	0.0155538	0.345861	1
[truncated: 39,379 more rows]
