# Supplementary material for: Collagen Type I Improves the Differentiation of Human Embryonic Stem Cells towards Definitive Endoderm
Source: PLoS One. 2015 Dec 29;10(12):e0145389. doi: 10.1371/journal.pone.0145389 (PMC4694921; doi:10.1371/journal.pone.0145389)
Supplement: S8 Table — Gene expression in cell on Vn compared to the gene expression in cells on Fn. (XLSX) [file pone.0145389.s012.xlsx]

## Sheet: Ark1
Vn vs Fn
Ensembl_gene_ID	Gene_name	UniProt_ID	UniProt_accession	Probe_ID	log2 Fold Change	Average Expression	t statistic	p-Value	BH-adusted p-Value	Bonferroni corrected p-value
ENSG00000148680	HTR7	5HT7R_HUMAN	P34969	A_23_P500381	0.39671	8.85029	5.55792	4.45508e-05	0.444226	1
ENSG00000265972	TXNIP	TXNIP_HUMAN	Q9H3M7	A_23_P97700	0.54639	9.2527	5.20077	8.97519e-05	0.444226	1
ENSG00000205364	MT1M	MT1M_HUMAN	Q8N339	A_23_P66241	0.601301	7.59612	5.13877	0.000101519	0.444226	1
ENSG00000134574	DDB2	DDB2_HUMAN	Q92466	A_23_P52610	0.369505	12.4104	5.11418	0.000106615	0.444226	1
ENSG00000166816	LDHD	LDHD_HUMAN	Q86WU2	A_23_P54918	0.398207	7.47101	5.095	0.000110773	0.444226	1
ENSG00000131203	IDO1	I23O1_HUMAN	P14902	A_23_P112026	0.310346	8.86857	5.08297	0.000113468	0.444226	1
ENSG00000279719	-	-	-	A_23_P117828	0.358995	6.94205	5.01464	0.000130097	0.444226	1
ENSG00000120937	NPPB	ANFB_HUMAN	P16860	A_23_P62752	-0.555474	16.2718	-4.93896	0.000151467	0.444226	1
ENSG00000168703	WFDC12	WFD12_HUMAN	Q8WWY7	A_23_P68436	-0.338227	6.88733	-4.87813	0.000171244	0.444226	1
ENSG00000185186	-	-	-	A_23_P381489	0.316829	6.96312	4.87596	0.000171994	0.444226	1
ENSG00000280191	-	-	-	A_23_P381489	0.316829	6.96312	4.87596	0.000171994	0.444226	1
ENSG00000164647	STEAP1	STEA1_HUMAN	Q9UHE8	A_23_P31453	0.410286	8.03735	4.86458	0.000175999	0.444226	1
ENSG00000232021	-	-	-	A_24_P213788	-0.383652	6.99348	-4.86176	0.000177003	0.444226	1
ENSG00000197406	DIO3	IOD3_HUMAN	P55073	A_23_P105923	-0.630633	12.3054	-4.83779	0.000185803	0.444226	1
ENSG00000230937	-	-	-	A_24_P716394	0.442042	10.3108	4.78355	0.000207406	0.444226	1
ENSG00000183023	SLC8A1	NAC1_HUMAN	P32418	A_24_P136866	-0.34479	7.54373	-4.67697	0.00025768	0.444226	1
ENSG00000187240	DYNC2H1	DYHC2_HUMAN	Q8NCM8	A_24_P83846	-0.314279	7.04261	-4.64437	0.000275432	0.444226	1
ENSG00000273729	-	-	-	A_32_P229358	0.363503	7.15244	4.63735	0.000279411	0.444226	1
ENSG00000177301	KCNA2	KCNA2_HUMAN	P16389	A_32_P40596	0.325377	6.9031	4.57014	0.000320663	0.444226	1
ENSG00000161513	FDXR	ADRO_HUMAN	P22570	A_23_P38154	0.377891	13.3158	4.54866	0.000335125	0.444226	1
ENSG00000163793	DNAJC5G	DNJ5G_HUMAN	Q8N7S2	A_23_P417921	-0.327279	7.11184	-4.5227	0.000353488	0.444226	1
ENSG00000265438	-	-	-	A_23_P119337	-0.290757	8.8037	-4.5149	0.000359203	0.444226	1
ENSG00000169136	ATF5	ATF5_HUMAN	Q9Y2D1	A_23_P119337	-0.290757	8.8037	-4.5149	0.000359203	0.444226	1
ENSG00000142634	EFHD2	EFHD2_HUMAN	Q96C19	A_23_P23443	-0.354646	11.1038	-4.50926	0.000363397	0.444226	1
ENSG00000186198	SLC51B	OSTB_HUMAN	Q86UW2	A_23_P436284	0.314878	7.09088	4.50587	0.000365945	0.444226	1
ENSG00000128383	APOBEC3A	ABC3A_HUMAN	P31941	A_24_P66027	0.301189	7.62934	4.50228	0.000368659	0.444226	1
ENSG00000179750	APOBEC3B	ABC3B_HUMAN	Q9UH17	A_24_P66027	0.301189	7.62934	4.50228	0.000368659	0.444226	1
ENSG00000211807	TRAV26-1	-	-	A_23_P44857	-0.294925	6.97317	-4.4835	0.000383196	0.444226	1
ENSG00000212128	TAS2R13	T2R13_HUMAN	Q9NYV9	A_23_P99080	-0.290833	7.01078	-4.47804	0.00038753	0.444226	1
ENSG00000147113	CXorf36	DIA1R_HUMAN	Q9H7Y0	A_24_P160225	0.379006	6.93834	4.46988	0.000394098	0.444226	1
ENSG00000116774	OLFML3	OLFL3_HUMAN	Q9NRN5	A_32_P24832	0.467953	9.33377	4.45224	0.000408698	0.444226	1
ENSG00000163349	HIPK1	HIPK1_HUMAN	Q86Z02	A_32_P24832	0.467953	9.33377	4.45224	0.000408698	0.444226	1
ENSG00000164120	HPGD	PGDH_HUMAN	P15428	A_24_P71904	0.356246	7.35069	4.42376	0.000433443	0.444226	1
ENSG00000136098	NEK3	NEK3_HUMAN	P51956	A_23_P65320	-0.294139	8.89413	-4.41865	0.000438041	0.444226	1
ENSG00000107147	KCNT1	KCNT1_HUMAN	Q5JUK3	A_24_P155169	-0.329989	7.13788	-4.41463	0.000441691	0.444226	1
ENSG00000148123	LPPR1	-	-	A_23_P259707	0.364505	7.10826	4.41184	0.000444246	0.444226	1
ENSG00000103257	SLC7A5	LAT1_HUMAN	Q01650	A_24_P335620	-0.319623	13.9356	-4.38778	0.000466902	0.444226	1
ENSG00000068831	RASGRP2	GRP2_HUMAN	Q7LDG7	A_23_P64058	0.486449	8.97227	4.37989	0.00047458	0.444226	1
ENSG00000135373	EHF	EHF_HUMAN	Q9NZC4	A_24_P64442	0.328652	6.88123	4.3784	0.000476043	0.444226	1
ENSG00000132274	TRIM22	TRI22_HUMAN	Q8IYM9	A_23_P203498	0.633203	8.7866	4.37596	0.000478453	0.444226	1
ENSG00000132669	RIN2	RIN2_HUMAN	Q8WYP3	A_23_P91379	-0.300832	7.05711	-4.36939	0.000485007	0.444226	1
ENSG00000179820	MYADM	MYADM_HUMAN	Q96S97	A_24_P134195	-0.330971	10.452	-4.33538	0.000520402	0.444226	1
ENSG00000130270	ATP8B3	AT8B3_HUMAN	O60423	A_23_P79108	0.915267	8.49401	4.32537	0.000531307	0.444226	1
ENSG00000168772	CXXC4	CXXC4_HUMAN	Q9H2H0	A_23_P121676	0.406785	8.05536	4.30552	0.000553639	0.444226	1
ENSG00000185432	METTL7A	MET7A_HUMAN	Q9H8H3	A_23_P415021	0.534597	9.33435	4.27528	0.0005895	0.444226	1
ENSG00000104856	RELB	RELB_HUMAN	Q01201	A_23_P55706	-0.490833	11.9988	-4.26688	0.00059988	0.444226	1
ENSG00000129151	BBOX1	BODG_HUMAN	O75936	A_23_P127495	0.376961	7.00278	4.2664	0.000600477	0.444226	1
ENSG00000088340	-	-	-	A_24_P23454	0.326905	7.02564	4.26082	0.000607487	0.444226	1
ENSG00000196678	ERI2	ERI2_HUMAN	A8K979	A_23_P129717	0.382632	7.02684	4.24716	0.000624979	0.444226	1
ENSG00000125414	MYH2	MYH2_HUMAN	Q9UKX2	A_23_P38271	0.617662	9.12846	4.23548	0.000640341	0.444226	1
ENSG00000235688	-	-	-	A_32_P49764	0.545353	10.4933	4.23425	0.000641977	0.444226	1
ENSG00000226051	-	-	-	A_24_P589001	-0.353735	6.98625	-4.22509	0.000654335	0.444226	1
ENSG00000115290	GRB14	GRB14_HUMAN	Q14449	A_23_P154526	0.345412	9.68783	4.2086	0.000677175	0.444226	1
ENSG00000166482	MFAP4	MFAP4_HUMAN	P55083	A_23_P164057	-0.652095	12.7988	-4.19272	0.000699944	0.444226	1
ENSG00000103089	FA2H	FA2H_HUMAN	Q7L5A8	A_23_P49448	0.356609	8.84629	4.18454	0.000711964	0.444226	1
ENSG00000164344	KLKB1	KLKB1_HUMAN	P03952	A_23_P252236	0.376133	8.79191	4.18317	0.000714008	0.444226	1
ENSG00000124721	DNAH8	DYH8_HUMAN	Q96JB1	A_24_P926631	0.294399	7.02966	4.15635	0.000755057	0.444226	1
ENSG00000233369	-	-	-	A_24_P95007	-0.275776	11.9436	-4.15136	0.000762943	0.444226	1
ENSG00000277053	-	-	-	A_24_P95007	-0.275776	11.9436	-4.15136	0.000762943	0.444226	1
ENSG00000263001	GTF2I	GTF2I_HUMAN	P78347	A_24_P95007	-0.275776	11.9436	-4.15136	0.000762943	0.444226	1
ENSG00000168003	SLC3A2	4F2_HUMAN	P08195	A_23_P75811	-0.355056	13.92	-4.14479	0.000773478	0.444226	1
ENSG00000230303	-	-	-	A_32_P151851	0.401559	7.00112	4.14109	0.000779472	0.444226	1
ENSG00000226877	-	-	-	A_32_P151851	0.401559	7.00112	4.14109	0.000779472	0.444226	1
ENSG00000242550	SERPINB10	SPB10_HUMAN	P48595	A_23_P313981	-0.309037	7.07189	-4.1189	0.000816401	0.444226	1
ENSG00000132274	TRIM22	TRI22_HUMAN	Q8IYM9	A_24_P172481	0.537913	8.52241	4.11379	0.000825165	0.444226	1
ENSG00000013293	SLC7A14	S7A14_HUMAN	Q8TBB6	A_23_P253451	0.396171	9.37296	4.10507	0.000840325	0.444226	1
ENSG00000085274	MYNN	MYNN_HUMAN	Q9NPC7	A_24_P260254	-0.371017	7.04366	-4.07736	0.000890397	0.444226	1
ENSG00000183807	FAM162B	F162B_HUMAN	Q5T6X4	A_23_P145054	0.354428	7.71167	4.07687	0.00089132	0.444226	1
ENSG00000003147	ICA1	ICA69_HUMAN	Q05084	A_23_P215419	0.256671	10.4924	4.07633	0.000892324	0.444226	1
ENSG00000003147	ICAp69	ICA69_HUMAN	Q05084	A_23_P215419	0.256671	10.4924	4.07633	0.000892324	0.444226	1
ENSG00000122507	BBS9	PTHB1_HUMAN	Q3SYG4	A_23_P82351	0.420424	12.0191	4.06445	0.000914758	0.444226	1
ENSG00000130813	C19orf66	CS066_HUMAN	Q9NUL5	A_23_P38894	0.354825	9.79723	4.06141	0.000920594	0.444226	1
ENSG00000187003	ACTL7A	ACL7A_HUMAN	Q9Y615	A_23_P31984	0.292482	7.05219	4.05019	0.00094245	0.444226	1
ENSG00000271602	-	-	-	A_24_P745352	-0.375114	8.31512	-4.04271	0.000957303	0.444226	1
ENSG00000110888	CAPRIN2	CAPR2_HUMAN	Q6IMN6	A_23_P87532	0.317725	10.0296	4.0402	0.000962352	0.444226	1
ENSG00000139266	39873	MARH9_HUMAN	Q86YJ5	A_23_P47777	0.336669	10.8584	4.03625	0.000970339	0.444226	1
ENSG00000105329	TGFB1	TGFB1_HUMAN	P01137	A_24_P79054	-0.32395	10.4138	-4.03155	0.000979923	0.444226	1
ENSG00000143156	NME7	NDK7_HUMAN	Q9Y5B8	A_32_P223786	-0.329328	7.22507	-4.02885	0.000985478	0.444226	1
ENSG00000215483	-	-	-	A_24_P153701	-0.27899	6.93251	-4.02744	0.000988374	0.444226	1
ENSG00000265491	RNF115	RN115_HUMAN	Q9Y4L5	A_23_P161064	-0.251258	10.9509	-4.01937	0.00100522	0.444226	1
ENSG00000104341	LAPTM4B	LAP4B_HUMAN	Q86VI4	A_24_P414999	-0.287145	14.9449	-4.01463	0.00101525	0.444226	1
ENSG00000271266	-	-	-	A_24_P414999	-0.287145	14.9449	-4.01463	0.00101525	0.444226	1
ENSG00000065320	NTN1	NET1_HUMAN	O95631	A_32_P53524	-0.287048	12.2432	-4.01321	0.00101827	0.444226	1
ENSG00000162496	DHRS3	DHRS3_HUMAN	O75911	A_23_P33759	0.403549	9.99504	4.01294	0.00101884	0.444226	1
ENSG00000135679	MDM2	MDM2_HUMAN	Q00987	A_24_P925664	0.296946	9.40633	4.01167	0.00102156	0.444226	1
ENSG00000135679	MDM2 isoform KB9	MDM2_HUMAN	Q00987	A_24_P925664	0.296946	9.40633	4.01167	0.00102156	0.444226	1
ENSG00000135679	mdm2	MDM2_HUMAN	Q00987	A_24_P925664	0.296946	9.40633	4.01167	0.00102156	0.444226	1
ENSG00000174837	EMR1	EMR1_HUMAN	Q14246	A_23_P27556	-0.299895	7.0058	-4.01061	0.00102382	0.444226	1
ENSG00000196263	ZNF471	ZN471_HUMAN	Q9BX82	A_32_P45351	-0.294168	6.94823	-4.01033	0.00102441	0.444226	1
ENSG00000169851	PCDH7	PCDH7_HUMAN	O60245	A_23_P378364	-0.279495	9.27352	-4.00839	0.0010286	0.444226	1
ENSG00000179002	TAS1R2	TS1R2_HUMAN	Q8TE23	A_23_P335957	0.404205	6.98302	3.99819	0.0010508	0.444226	1
ENSG00000154556	SORBS2	SRBS2_HUMAN	O94875	A_23_P121795	0.286681	7.8375	3.99234	0.00106374	0.444226	1
ENSG00000259923	-	-	-	A_23_P37983	0.60251	9.3109	3.97536	0.00110225	0.444226	1
ENSG00000169688	MT1B	MT1B_HUMAN	P07438	A_23_P37983	0.60251	9.3109	3.97536	0.00110225	0.444226	1
ENSG00000158825	CDA	CDD_HUMAN	P32320	A_23_P34597	-0.441444	10.5191	-3.97493	0.00110324	0.444226	1
ENSG00000125740	FOSB	FOSB_HUMAN	P53539	A_23_P429998	-0.245053	7.78076	-3.9689	0.00111728	0.444226	1
ENSG00000141200	KIF2B	KIF2B_HUMAN	Q8N4N8	A_23_P107102	-0.262607	7.06367	-3.95916	0.00114033	0.444226	1
ENSG00000179046	FLJ25801	TRIMM_HUMAN	Q8N7C3	A_23_P350005	0.53923	11.9624	3.95884	0.00114108	0.444226	1
ENSG00000179046	TRIML2	TRIMM_HUMAN	Q8N7C3	A_23_P350005	0.53923	11.9624	3.95884	0.00114108	0.444226	1
ENSG00000184995	IFNE	IFNE_HUMAN	Q86WN2	A_23_P302060	0.234519	7.17543	3.95212	0.00115727	0.444226	1
ENSG00000100226	GTPBP1	GTPB1_HUMAN	O00178	A_23_P416106	-0.259339	8.93284	-3.94927	0.00116421	0.444226	1
ENSG00000222371	-	-	-	A_24_P376120	-0.262638	7.02084	-3.9401	0.0011868	0.444226	1
ENSG00000138347	MYPN	MYPN_HUMAN	Q86TC9	A_24_P376120	-0.262638	7.02084	-3.9401	0.0011868	0.444226	1
ENSG00000214686	IQCF6	IQCF6_HUMAN	A8MYZ5	A_32_P13756	-0.295835	6.95458	-3.93881	0.00119001	0.444226	1
ENSG00000136160	EDNRB	EDNRB_HUMAN	P24530	A_23_P2831	0.454638	10.7489	3.92748	0.00121863	0.444226	1
ENSG00000164161	HHIP	HHIP_HUMAN	Q96QV1	A_23_P167129	0.25379	7.14846	3.92071	0.00123607	0.444226	1
ENSG00000248925	-	-	-	A_32_P129243	-0.267658	6.91284	-3.92027	0.00123721	0.444226	1
ENSG00000164695	CHMP4C	CHM4C_HUMAN	Q96CF2	A_23_P432598	0.286066	8.3443	3.91716	0.00124529	0.444226	1
ENSG00000153930	ANKFN1	ANKF1_HUMAN	Q8N957	A_32_P316545	0.319575	7.07444	3.90663	0.00127312	0.444226	1
ENSG00000127780	OR1E2	OR1E2_HUMAN	P47887	A_23_P101073	-0.323983	6.92716	-3.9034	0.00128178	0.444226	1
ENSG00000180016	OR1E1	OR1E1_HUMAN	P30953	A_23_P101073	-0.323983	6.92716	-3.9034	0.00128178	0.444226	1
ENSG00000105205	CLC	LEG10_HUMAN	Q05315	A_23_P101683	0.55375	10.0038	3.88793	0.00132408	0.444226	1
ENSG00000125148	MT2A	MT2_HUMAN	P02795	A_24_P361896	0.786646	10.0656	3.876	0.00135765	0.444226	1
ENSG00000168918	INPP5D	SHIP1_HUMAN	Q92835	A_23_P61149	0.513859	9.58002	3.87242	0.00136789	0.444226	1
ENSG00000089012	SIRPG	SIRPG_HUMAN	Q9P1W8	A_24_P353208	-0.343362	6.96015	-3.86986	0.00137527	0.444226	1
ENSG00000213771	-	-	-	A_24_P247074	-0.588075	11.3164	-3.86866	0.00137874	0.444226	1
ENSG00000172399	MYOZ2	MYOZ2_HUMAN	Q9NPC6	A_24_P166126	0.369382	6.94997	3.86674	0.00138429	0.444226	1
ENSG00000158560	DYNC1I1	DC1I1_HUMAN	O14576	A_24_P221414	-0.312316	8.41812	-3.86512	0.00138903	0.444226	1
ENSG00000173894	CBX2	CBX2_HUMAN	Q14781	A_23_P353567	0.395005	7.19594	3.85727	0.00141209	0.444226	1
ENSG00000123594	ATXN3L	ATX3L_HUMAN	Q9H3M9	A_23_P361744	-0.352643	7.04652	-3.85686	0.00141332	0.444226	1
ENSG00000100068	LRP5L	LRP5L_HUMAN	A4QPB2	A_24_P387514	0.305058	7.57364	3.85076	0.00143155	0.444226	1
ENSG00000197472	ZNF695	ZN695_HUMAN	Q8IW36	A_23_P35316	0.304293	7.44344	3.84776	0.00144058	0.444226	1
ENSG00000142149	HUNK	HUNK_HUMAN	P57058	A_24_P160070	0.280516	7.04429	3.83943	0.001466	0.444226	1
ENSG00000055070	SZRD1	SZRD1_HUMAN	Q7Z422	A_24_P396489	-0.354569	8.31107	-3.83415	0.00148238	0.444226	1
ENSG00000184260	HIST2H2AC	H2A2C_HUMAN	Q16777	A_23_P301247	-0.405421	12.1856	-3.83301	0.00148592	0.444226	1
ENSG00000178096	BOLA1	BOLA1_HUMAN	Q9Y3E2	A_23_P301247	-0.405421	12.1856	-3.83301	0.00148592	0.444226	1
ENSG00000267787	-	-	-	A_24_P212281	-0.290905	7.09095	-3.8256	0.00150922	0.444226	1
ENSG00000261327	-	-	-	A_24_P282266	0.243655	7.0509	3.81882	0.00153087	0.444226	1
ENSG00000173535	TNFRSF10C	TR10C_HUMAN	O14798	A_23_P256724	0.323743	8.35919	3.81304	0.00154958	0.444226	1
ENSG00000064655	EYA2	EYA2_HUMAN	O00167	A_23_P319859	-0.343324	10.5654	-3.81221	0.0015523	0.444226	1
ENSG00000171467	ZNF318	ZN318_HUMAN	Q5VUA4	A_24_P204043	-0.245129	7.54577	-3.8016	0.00158729	0.444226	1
ENSG00000143819	EPHX1	HYEP_HUMAN	P07099	A_23_P34537	-0.360025	11.0652	-3.80136	0.00158811	0.444226	1
ENSG00000153820	SPHKAP	SPKAP_HUMAN	Q2M3C7	A_23_P428485	0.336335	6.91224	3.7835	0.00164884	0.444226	1
ENSG00000106278	PTPRZ1	PTPRZ_HUMAN	P23471	A_24_P235248	0.41058	9.42132	3.77802	0.00166796	0.444226	1
ENSG00000139219	COL2A1	CO2A1_HUMAN	P02458	A_23_P500464	-0.457776	10.4143	-3.7767	0.00167258	0.444226	1
ENSG00000165061	ZMAT4	ZMAT4_HUMAN	Q9H898	A_32_P164593	0.362047	8.65911	3.7756	0.00167647	0.444226	1
ENSG00000117091	CD48	CD48_HUMAN	P09326	A_23_P74145	-0.812961	9.22991	-3.77512	0.00167814	0.444226	1
ENSG00000105519	CAPS	CAYP1_HUMAN	Q13938	A_23_P78958	0.274158	8.19113	3.76827	0.00170251	0.444226	1
ENSG00000178401	DNAJC22	DJC22_HUMAN	Q8N4W6	A_32_P407245	-0.248221	8.25712	-3.76678	0.00170784	0.444226	1
ENSG00000144460	NYAP2	NYAP2_HUMAN	Q9P242	A_24_P49427	-0.329768	6.86044	-3.76618	0.00170998	0.444226	1
ENSG00000169418	NPR1	ANPRA_HUMAN	P16066	A_23_P147711	-0.310844	8.53189	-3.7621	0.00172472	0.444226	1
ENSG00000134532	SOX5	SOX5_HUMAN	P35711	A_23_P87952	-0.263538	7.74166	-3.75907	0.00173574	0.444226	1
ENSG00000260336	-	-	-	A_32_P99461	0.2589	8.61313	3.75574	0.00174794	0.444226	1
ENSG00000115963	ARHE	RND3_HUMAN	P61587	A_23_P142849	0.633327	9.87048	3.75501	0.00175064	0.444226	1
ENSG00000115963	RND3	RND3_HUMAN	P61587	A_23_P142849	0.633327	9.87048	3.75501	0.00175064	0.444226	1
ENSG00000176485	PLA2G16	HRSL3_HUMAN	P53816	A_23_P116414	0.334764	13.4996	3.7531	0.00175768	0.444226	1
ENSG00000120669	SOHLH2	SOLH2_HUMAN	Q9NX45	A_23_P25615	0.248949	8.83641	3.75109	0.00176513	0.444226	1
ENSG00000090530	LEPREL1	P3H2_HUMAN	Q8IVL5	A_23_P69179	-0.350954	15.7221	-3.75107	0.0017652	0.444226	1
ENSG00000174460	ZCCHC12	ZCH12_HUMAN	Q6PEW1	A_23_P125809	-0.286364	7.77644	-3.74949	0.00177107	0.444226	1
ENSG00000161798	AQP5	AQP5_HUMAN	P55064	A_23_P117104	0.305228	8.09503	3.74911	0.0017725	0.444226	1
ENSG00000120324	PCDHB10	PCDBA_HUMAN	Q9UN67	A_23_P7397	0.258097	7.33534	3.74721	0.0017796	0.444226	1
ENSG00000250539	-	-	-	A_32_P112546	-0.417406	13.8645	-3.74611	0.00178369	0.444226	1
ENSG00000152932	RAB3C	RAB3C_HUMAN	Q96E17	A_23_P44794	0.279136	8.81729	3.73772	0.00181547	0.448514	1
ENSG00000116106	EPHA4	EPHA4_HUMAN	P54764	A_23_P108501	-0.42355	10.8036	-3.73268	0.00183483	0.448801	1
ENSG00000048707	VPS13D	VP13D_HUMAN	Q5THJ4	A_32_P20582	0.220141	7.61464	3.72889	0.0018495	0.449714	1
ENSG00000237675	-	-	-	A_32_P120127	0.233833	7.02529	3.7201	0.00188402	0.455411	1
ENSG00000227470	-	-	-	A_32_P234391	-0.276287	7.20274	-3.71257	0.00191411	0.458681	1
ENSG00000184363	PKP3	PKP3_HUMAN	Q9Y446	A_23_P95810	0.270256	12.1748	3.70865	0.00192994	0.458681	1
ENSG00000125798	FOXA2	FOXA2_HUMAN	Q9Y261	A_24_P365523	-0.306985	10.3865	-3.70838	0.00193103	0.458681	1
ENSG00000198502	HLA-DRB5	DRB5_HUMAN	Q30154	A_23_P45099	0.359125	9.088	3.70274	0.00195408	0.461488	1
ENSG00000146416	AIG1	AIG1_HUMAN	Q9NVV5	A_23_P93431	0.425537	10.1235	3.69722	0.00197692	0.464214	1
ENSG00000105323	HNRNPUL1	HNRL1_HUMAN	Q9BUJ2	A_24_P108351	-0.296245	10.3025	-3.68936	0.00200991	0.469279	1
ENSG00000224215	-	-	-	A_32_P33185	-0.312533	6.97932	-3.67779	0.00205942	0.47191	1
ENSG00000260912	-	-	-	A_32_P170664	0.355747	8.90372	3.67363	0.00207751	0.47191	1
ENSG00000251095	-	-	-	A_32_P59355	0.230946	7.64764	3.66386	0.00212067	0.475034	1
ENSG00000162999	DUSP19	DUS19_HUMAN	Q8WTR2	A_24_P911860	0.346121	7.10678	3.66334	0.00212299	0.475034	1
ENSG00000260735	-	-	-	A_32_P230529	-0.268749	6.95345	-3.66244	0.00212704	0.475034	1
ENSG00000254101	-	-	-	A_24_P564761	0.353491	7.1388	3.65421	0.00216419	0.476759	1
ENSG00000175556	LONRF3	LONF3_HUMAN	Q496Y0	A_24_P297302	-0.311587	7.00057	-3.6525	0.00217198	0.476759	1
ENSG00000148677	ANKRD1	ANKR1_HUMAN	Q15327	A_23_P161218	-0.529273	9.93462	-3.6505	0.00218117	0.476759	1
ENSG00000153094	BCL2L11	B2L11_HUMAN	O43521	A_23_P309991	0.240807	7.37443	3.646	0.00220191	0.478747	1
ENSG00000108312	UBTF	UBF1_HUMAN	P17480	A_23_P100779	-0.244928	8.83449	-3.63932	0.00223311	0.481464	1
ENSG00000171962	LRRC48	LRC48_HUMAN	Q9H069	A_23_P255701	-0.255796	7.06953	-3.63372	0.00225955	0.481464	1
ENSG00000135324	MRAP2	MRAP2_HUMAN	Q96G30	A_23_P357207	0.303169	10.0603	3.62922	0.00228107	0.481464	1
ENSG00000013588	GPRC5A	RAI3_HUMAN	Q8NFJ5	A_24_P98948	-0.228642	7.15604	-3.62916	0.00228136	0.481464	1
ENSG00000259330	-	-	-	A_32_P76992	0.263731	9.95038	3.62819	0.00228601	0.481464	1
ENSG00000111700	SLCO1B3	SO1B3_HUMAN	Q9NPD5	A_23_P105475	0.251163	6.97053	3.62603	0.00229643	0.481464	1
ENSG00000211956	IGHV4-34	-	-	A_24_P315854	-0.3292	7.10388	-3.62146	0.00231862	0.48365	1
ENSG00000211970	-	-	-	A_24_P315854	-0.3292	7.10388	-3.62146	0.00231862	0.48365	1
ENSG00000224373	-	-	-	A_24_P315854	-0.3292	7.10388	-3.62146	0.00231862	0.48365	1
ENSG00000164045	CDC25A	MPIP1_HUMAN	P30304	A_23_P121423	-0.241849	9.20555	-3.6131	0.00235981	0.485777	1
ENSG00000171469	ZNF561	ZN561_HUMAN	Q8N587	A_32_P113114	0.269383	9.88926	3.61058	0.00237236	0.485777	1
ENSG00000139200	PIANP	PIANP_HUMAN	Q8IYJ0	A_23_P424603	-0.223612	7.37638	-3.60237	0.00241372	0.485777	1
ENSG00000145192	AHSG	FETUA_HUMAN	P02765	A_23_P155509	0.266453	7.57742	3.58558	0.00250052	0.485777	1
ENSG00000197079	KRT35	KRT35_HUMAN	Q92764	A_23_P78201	0.323865	7.11994	3.58124	0.00252347	0.485777	1
ENSG00000164120	HPGD	PGDH_HUMAN	P15428	A_23_P213050	0.462324	8.96311	3.58089	0.00252533	0.485777	1
ENSG00000233461	-	-	-	A_32_P212373	0.266875	8.82524	3.57791	0.00254124	0.485777	1
ENSG00000086015	MAST2	MAST2_HUMAN	Q6P0Q8	A_23_P126008	-0.245752	10.0096	-3.57548	0.00255429	0.485777	1
ENSG00000274391	TPTE	TPTE_HUMAN	P56180	A_23_P345746	0.252854	7.47433	3.57427	0.00256078	0.485777	1
ENSG00000273840	-	-	-	A_23_P345746	0.252854	7.47433	3.57427	0.00256078	0.485777	1
ENSG00000233820	-	-	-	A_32_P122402	-0.281392	10.4326	-3.57311	0.00256707	0.485777	1
ENSG00000100557	C14orf105	CN105_HUMAN	Q9NVL8	A_23_P3065	-0.359034	7.10073	-3.57295	0.00256789	0.485777	1
ENSG00000196792	STRN3	STRN3_HUMAN	Q13033	A_23_P65410	-0.237392	8.97386	-3.57051	0.00258112	0.485777	1
ENSG00000125848	FLRT3	FLRT3_HUMAN	Q9NZU0	A_23_P166109	-0.292845	12.7329	-3.56789	0.0025954	0.485777	1
ENSG00000250221	-	-	-	A_24_P844100	-0.449367	9.6863	-3.56583	0.0026067	0.485777	1
ENSG00000150201	FXYD4	FXYD4_HUMAN	P59646	A_23_P98121	0.279893	7.25894	3.56514	0.00261049	0.485777	1
ENSG00000075884	ARHGAP15	RHG15_HUMAN	Q53QZ3	A_23_P255166	-0.301763	7.10112	-3.55679	0.00265675	0.485777	1
ENSG00000135077	HAVCR2	HAVR2_HUMAN	Q8TDQ0	A_24_P923370	-0.314699	7.00557	-3.55446	0.00266981	0.485777	1
ENSG00000119335	SET	SET_HUMAN	Q01105	A_23_P217015	-0.255444	11.0833	-3.54897	0.00270087	0.485777	1
ENSG00000056291	NPFFR2	NPFF2_HUMAN	Q9Y5X5	A_23_P155900	0.294996	7.66505	3.54252	0.00273776	0.485777	1
ENSG00000121743	GJA3	CXA3_HUMAN	Q9Y6H8	A_32_P205241	0.288794	7.06672	3.54232	0.00273892	0.485777	1
ENSG00000116584	ARHGEF2	ARHG2_HUMAN	Q92974	A_23_P51699	-0.261393	10.1404	-3.54196	0.00274104	0.485777	1
ENSG00000136048	DRAM1	DRAM1_HUMAN	Q8N682	A_23_P99163	0.383313	9.7501	3.54151	0.00274363	0.485777	1
ENSG00000012171	SEMA3B	SEM3B_HUMAN	Q13214	A_23_P132718	0.319213	9.54026	3.54143	0.00274405	0.485777	1
ENSG00000178401	DNAJC22	DJC22_HUMAN	Q8N4W6	A_23_P253661	-0.297413	8.60944	-3.54125	0.00274514	0.485777	1
ENSG00000077684	JADE1	JADE1_HUMAN	Q6IE81	A_23_P167256	0.22442	12.6235	3.54064	0.00274861	0.485777	1
ENSG00000105851	PIK3CG	PK3CG_HUMAN	P48736	A_23_P251359	0.232312	6.91502	3.54005	0.00275208	0.485777	1
ENSG00000136048	DRAM1	DRAM1_HUMAN	Q8N682	A_24_P355816	0.371786	9.52217	3.53993	0.00275277	0.485777	1
ENSG00000186470	BTN3A2	BT3A2_HUMAN	P78410	A_23_P391264	0.300359	7.34359	3.53967	0.00275426	0.485777	1
ENSG00000242173	ARHGDIG	GDIR3_HUMAN	Q99819	A_24_P215882	-0.269807	10.1987	-3.53906	0.00275782	0.485777	1
ENSG00000173598	NUDT4	NUDT4_HUMAN	Q9NZJ9	A_32_P117723	-0.2755	10.6472	-3.53403	0.00278718	0.485777	1
ENSG00000099834	CDHR5	-	-	A_23_P202683	0.301087	6.99577	3.5322	0.00279792	0.485777	1
ENSG00000125845	BMP2	BMP2_HUMAN	P12643	A_23_P143331	-0.386486	12.3953	-3.52922	0.00281551	0.485777	1
ENSG00000237399	-	-	-	A_24_P919805	0.286255	6.95143	3.52459	0.00284311	0.485777	1
ENSG00000116017	ARID3A	ARI3A_HUMAN	Q99856	A_23_P16516	-0.246438	11.93	-3.52438	0.00284437	0.485777	1
ENSG00000203965	EFCAB7	EFCB7_HUMAN	A8K855	A_24_P118608	0.218039	8.41352	3.5218	0.00285983	0.485777	1
ENSG00000130635	COL5A1	CO5A1_HUMAN	P20908	A_23_P83818	-0.248684	8.82458	-3.52159	0.00286109	0.485777	1
ENSG00000146021	KLHL3	KLHL3_HUMAN	Q9UH77	A_23_P133543	0.264514	8.72662	3.51993	0.00287108	0.485777	1
ENSG00000143919	CAMKMT	CMKMT_HUMAN	Q7Z624	A_23_P153941	-0.342351	9.70858	-3.51911	0.00287604	0.485777	1
ENSG00000166763	-	-	-	A_23_P163238	-0.315629	7.0499	-3.51821	0.00288152	0.485777	1
ENSG00000242866	STRC	STRC_HUMAN	Q7RTU9	A_23_P163238	-0.315629	7.0499	-3.51821	0.00288152	0.485777	1
ENSG00000118017	A4GNT	A4GCT_HUMAN	Q9UNA3	A_23_P58046	0.248653	6.94015	3.51559	0.00289748	0.485777	1
ENSG00000132326	PER2	PER2_HUMAN	O15055	A_23_P411162	-0.269666	7.76832	-3.51456	0.00290374	0.485777	1
ENSG00000154316	-	-	-	A_24_P334845	-0.271573	6.98256	-3.51298	0.00291345	0.485777	1
ENSG00000278931	-	-	-	A_32_P13151	0.269734	6.93556	3.51101	0.00292552	0.485777	1
ENSG00000205930	C21orf62-AS1	CMAS1_HUMAN	Q17RA5	A_24_P359322	0.313642	7.20096	3.51076	0.00292707	0.485777	1
ENSG00000133606	MKRN1	MKRN1_HUMAN	Q9UHC7	A_23_P59798	-0.272126	13.9935	-3.50937	0.00293561	0.485777	1
ENSG00000278619	MRM1	MRM1_HUMAN	Q6IN84	A_23_P15603	0.238597	9.24213	3.50788	0.00294489	0.485777	1
ENSG00000186479	RGS7BP	R7BP_HUMAN	Q6MZT1	A_23_P81233	-0.307142	7.02829	-3.50501	0.00296273	0.485777	1
ENSG00000182165	-	-	-	A_24_P274842	0.241369	9.30821	3.50223	0.0029801	0.485777	1
ENSG00000168314	MOBP	MOBP_HUMAN	Q13875	A_24_P182900	-0.21713	8.69512	-3.4973	0.00301118	0.485777	1
ENSG00000165138	ANKS6	ANKS6_HUMAN	Q68DC2	A_23_P362183	0.278609	11.1373	3.49335	0.00303631	0.485777	1
ENSG00000104368	PLAT	TPA_HUMAN	P00750	A_23_P82868	0.36238	7.98736	3.49258	0.00304123	0.485777	1
ENSG00000156711	MAPK13	MK13_HUMAN	O15264	A_24_P406132	0.253919	8.21444	3.49183	0.00304602	0.485777	1
ENSG00000260549	-	-	-	A_23_P427703	0.623906	9.31381	3.49122	0.00304992	0.485777	1
ENSG00000233369	-	-	-	A_24_P803801	-0.250845	11.661	-3.48733	0.00307504	0.487043	1
ENSG00000263001	GTF2I	GTF2I_HUMAN	P78347	A_24_P803801	-0.250845	11.661	-3.48733	0.00307504	0.487043	1
ENSG00000259948	-	-	-	A_32_P181725	-0.250609	7.06719	-3.48632	0.00308158	0.487043	1
ENSG00000131370	SH3BP5	3BP5_HUMAN	O60239	A_24_P148750	-0.263855	9.66381	-3.48247	0.00310667	0.489127	1
ENSG00000151164	RAD9B	RAD9B_HUMAN	Q6WBX8	A_23_P333650	-0.249111	7.0067	-3.47981	0.00312405	0.489986	1
ENSG00000260844	-	-	-	A_32_P143048	-0.208496	8.47343	-3.47674	0.00314434	0.491294	1
ENSG00000277969	-	-	-	A_24_P823514	-0.265003	7.50183	-3.47259	0.00317191	0.491861	1
ENSG00000151276	MAGI1	MAGI1_HUMAN	Q96QZ7	A_24_P75220	-0.208288	7.67548	-3.46932	0.00319381	0.493246	1
ENSG00000213201	-	-	-	A_24_P272515	0.248086	9.98062	3.46768	0.00320484	0.493246	1
ENSG00000125144	MT1G	MT1G_HUMAN	P13640	A_23_P60933	0.700416	9.82522	3.4647	0.00322503	0.494501	1
ENSG00000265573	-	-	-	A_23_P118266	0.306316	10.1953	3.45521	0.00329005	0.500296	1
ENSG00000140836	ZFHX3	ZFHX3_HUMAN	Q15911	A_23_P118266	0.306316	10.1953	3.45521	0.00329005	0.500296	1
ENSG00000145423	SFRP2	SFRP2_HUMAN	Q96HF1	A_24_P137501	0.505289	9.86985	3.45387	0.00329935	0.500296	1
ENSG00000180875	GREM2	GREM2_HUMAN	Q9H772	A_23_P329822	-0.278967	8.94171	-3.44935	0.00333088	0.500326	1
ENSG00000160293	VAV2	VAV2_HUMAN	P52735	A_23_P146468	-0.295414	7.46109	-3.44861	0.00333608	0.500326	1
ENSG00000137142	IGFBPL1	IBPL1_HUMAN	Q8WX77	A_24_P186274	-0.230496	9.64999	-3.44379	0.00337005	0.503584	1
ENSG00000132846	ZBED3	ZBED3_HUMAN	Q96IU2	A_23_P93032	0.314144	10.3727	3.43992	0.00339759	0.505538	1
ENSG00000170634	ACYP2	ACYP2_HUMAN	P14621	A_32_P110575	0.224013	8.6846	3.43851	0.00340774	0.505538	1
ENSG00000119865	CNRIP1	CNRP1_HUMAN	Q96F85	A_23_P329353	0.416326	8.87611	3.43668	0.00342082	0.505654	1
ENSG00000176049	JAKMIP2	JKIP2_HUMAN	Q96AA8	A_23_P156390	0.24047	8.84258	3.43301	0.0034474	0.507756	1
ENSG00000146250	PRSS35	PRS35_HUMAN	Q8N3Z0	A_23_P42397	-0.365591	10.4641	-3.42985	0.00347038	0.507896	1
ENSG00000157637	SLC38A10	S38AA_HUMAN	Q9HBR0	A_23_P55011	0.232114	12.6209	3.42948	0.00347307	0.507896	1
ENSG00000259917	-	-	-	A_24_P42122	-0.254725	11.2956	-3.42575	0.00350041	0.508277	1
ENSG00000268083	-	-	-	A_24_P42122	-0.254725	11.2956	-3.42575	0.00350041	0.508277	1
ENSG00000104824	HNRNPL	HNRPL_HUMAN	P14866	A_24_P42122	-0.254725	11.2956	-3.42575	0.00350041	0.508277	1
ENSG00000117091	CD48	CD48_HUMAN	P09326	A_32_P175934	-0.402459	7.78135	-3.42243	0.00352492	0.508672	1
ENSG00000213203	GIMAP1	GIMA1_HUMAN	Q8WWP7	A_23_P427023	-0.463959	6.6623	-3.42172	0.00353025	0.508672	1
ENSG00000119471	HSDL2	HSDL2_HUMAN	Q6YN16	A_23_P169197	0.26311	9.20531	3.41871	0.00355264	0.508672	1
ENSG00000237886	-	-	-	A_32_P220078	0.332753	9.16036	3.41591	0.0035736	0.509896	1
ENSG00000163254	CRYGC	CRGC_HUMAN	P07315	A_23_P142606	0.260015	7.13502	3.4111	0.00360996	0.511378	1
ENSG00000233579	-	-	-	A_24_P358474	-0.4135	9.11867	-3.40984	0.00361951	0.511378	1
ENSG00000197629	MPEG1	MPEG1_HUMAN	Q2M385	A_23_P127727	0.333523	7.19374	3.40234	0.00367705	0.512377	1
ENSG00000187021	PNLIPRP1	LIPR1_HUMAN	P54315	A_23_P35484	0.235692	6.98118	3.40139	0.00368445	0.512377	1
ENSG00000120457	KCNJ5	KCNJ5_HUMAN	P48544	A_23_P202927	-0.259224	7.22479	-3.39856	0.0037064	0.512377	1
ENSG00000130234	ACE2	ACE2_HUMAN	Q9BYF1	A_23_P252981	-0.38442	8.74096	-3.39748	0.00371484	0.512377	1
ENSG00000254573	-	-	-	A_32_P210902	-0.330642	6.99438	-3.39473	0.0037364	0.512377	1
ENSG00000119457	SLC46A2	TSCOT_HUMAN	Q9BY10	A_23_P31996	0.294935	6.8962	3.39329	0.0037477	0.512377	1
ENSG00000125148	MT2A	MT2_HUMAN	P02795	A_23_P106844	0.672393	10.2661	3.39112	0.00376489	0.512377	1
ENSG00000145284	SCD5	SCD5_HUMAN	Q86SK9	A_23_P354965	0.286993	6.92535	3.38908	0.00378108	0.512377	1
ENSG00000148200	NR6A1	NR6A1_HUMAN	Q15406	A_23_P216900	-0.225805	8.1719	-3.38889	0.00378257	0.512377	1
ENSG00000112208	BAG2	BAG2_HUMAN	O95816	A_23_P356554	0.252128	9.96682	3.38445	0.00381803	0.512377	1
ENSG00000122872	-	-	-	A_24_P32215	0.255829	7.27041	3.38233	0.00383512	0.512377	1
ENSG00000160633	SAFB	SAFB1_HUMAN	Q15424	A_23_P208446	-0.25293	10.3247	-3.38184	0.00383904	0.512377	1
ENSG00000170801	HTRA3	HTRA3_HUMAN	P83110	A_23_P395438	0.289813	8.27738	3.38114	0.00384469	0.512377	1
ENSG00000158815	FGF17	FGF17_HUMAN	O60258	A_23_P429363	-0.398802	12.8608	-3.3809	0.00384665	0.512377	1
ENSG00000204936	CD177	CD177_HUMAN	Q8N6Q3	A_23_P259868	-0.240438	7.5199	-3.37869	0.00386459	0.512377	1
ENSG00000175097	RAG2	RAG2_HUMAN	P55895	A_23_P64525	0.347004	6.98995	3.37754	0.00387393	0.512377	1
ENSG00000170421	KRT8	K2C8_HUMAN	P05787	A_23_P14072	-0.338892	14.7411	-3.37698	0.00387846	0.512377	1
ENSG00000254285	-	-	-	A_23_P14072	-0.338892	14.7411	-3.37698	0.00387846	0.512377	1
ENSG00000260092	-	-	-	A_23_P430670	-0.247092	7.33157	-3.37331	0.00390856	0.512377	1
ENSG00000135702	CHST5	CHST5_HUMAN	Q9GZS9	A_23_P430670	-0.247092	7.33157	-3.37331	0.00390856	0.512377	1
ENSG00000126461	SCAF1	SFR19_HUMAN	Q9H7N4	A_24_P117672	-0.27074	9.5598	-3.37137	0.00392447	0.512377	1
ENSG00000050165	DKK3	DKK3_HUMAN	Q9UBP4	A_24_P918317	-0.254543	10.91	-3.37003	0.00393553	0.512377	1
ENSG00000223478	-	-	-	A_24_P647163	0.296576	10.5305	3.36903	0.00394386	0.512377	1
ENSG00000125733	TRIP10	CIP4_HUMAN	Q15642	A_23_P50349	-0.252978	11.0233	-3.36735	0.00395778	0.512377	1
ENSG00000234481	-	-	-	A_24_P917519	-0.214595	7.02124	-3.36502	0.00397727	0.512377	1
ENSG00000225614	ZNF469	ZN469_HUMAN	Q96JG9	A_32_P116556	0.268302	7.9247	3.36468	0.00398006	0.512377	1
ENSG00000008056	SYN1	SYN1_HUMAN	P17600	A_23_P33847	-0.248786	7.57108	-3.36347	0.00399022	0.512377	1
ENSG00000102243	VGLL1	VGLL1_HUMAN	Q99990	A_23_P253123	0.273101	7.07323	3.36114	0.0040098	0.512377	1
ENSG00000186314	PRELID2	PRLD2_HUMAN	Q8N945	A_24_P346101	-0.19476	7.68305	-3.3606	0.00401435	0.512377	1
ENSG00000142619	PADI3	PADI3_HUMAN	Q9ULW8	A_23_P126869	-0.270862	6.97862	-3.36053	0.00401493	0.512377	1
ENSG00000159176	CSRP1	CSRP1_HUMAN	P21291	A_23_P74359	-0.344784	8.51086	-3.35786	0.00403755	0.513669	1
ENSG00000204148	-	-	-	A_23_P123704	0.327611	7.00465	3.35172	0.00408998	0.518733	1
ENSG00000135074	ADAM19	ADA19_HUMAN	Q9H013	A_23_P81369	-0.283895	8.35544	-3.34932	0.00411065	0.519684	1
ENSG00000214659	-	-	-	A_24_P890995	-0.380631	8.92041	-3.34792	0.00412277	0.519684	1
ENSG00000181072	CHRM2	ACM2_HUMAN	P08172	A_23_P145606	0.266427	7.15917	3.3417	0.00417698	0.522913	1
ENSG00000095139	ARCN1	COPD_HUMAN	P48444	A_24_P201531	-0.216404	11.5516	-3.34046	0.0041879	0.522913	1
ENSG00000167261	DPEP2	DPEP2_HUMAN	Q9H4A9	A_23_P118025	-0.319878	7.07277	-3.33966	0.00419499	0.522913	1
ENSG00000147601	TERF1	TERF1_HUMAN	P54274	A_32_P220696	0.293414	11.6009	3.33917	0.00419928	0.522913	1
ENSG00000151640	DPYSL4	DPYL4_HUMAN	O14531	A_23_P331049	0.289079	12.016	3.33147	0.0042678	0.522994	1
ENSG00000017427	IGF-I	IGF1_HUMAN	P05019	A_24_P304419	-0.347215	6.98879	-3.32749	0.0043036	0.522994	1
ENSG00000017427	IGF1	IGF1_HUMAN	P05019	A_24_P304419	-0.347215	6.98879	-3.32749	0.0043036	0.522994	1
ENSG00000240065	PSMB9	PSB9_HUMAN	P28065	A_23_P111000	0.244142	8.56397	3.32737	0.00430472	0.522994	1
ENSG00000021355	SERPINB1	ILEU_HUMAN	P30740	A_24_P269315	0.304554	8.49367	3.32574	0.00431947	0.522994	1
ENSG00000197430	OPALIN	OPALI_HUMAN	Q96PE5	A_24_P132813	-0.23002	7.15215	-3.32562	0.0043205	0.522994	1
ENSG00000167874	TMEM88	TMM88_HUMAN	Q6PEY1	A_23_P77859	-0.350488	12.1825	-3.32266	0.00434749	0.522994	1
ENSG00000132510	KDM6B	KDM6B_HUMAN	O15054	A_23_P77859	-0.350488	12.1825	-3.32266	0.00434749	0.522994	1
ENSG00000178694	NSUN3	NSUN3_HUMAN	Q9H649	A_32_P213822	-0.259812	7.99888	-3.32243	0.00434962	0.522994	1
ENSG00000145555	MYO10	MYO10_HUMAN	Q9HD67	A_24_P46357	-0.337702	9.75399	-3.32148	0.00435823	0.522994	1
ENSG00000124486	USP9X	USP9X_HUMAN	Q93008	A_23_P217409	0.229418	13.4598	3.32102	0.00436249	0.522994	1
ENSG00000257097	-	-	-	A_32_P13936	0.324562	6.99555	3.31923	0.00437896	0.522994	1
ENSG00000109586	GALNT7	GALT7_HUMAN	Q86SF2	A_23_P144384	0.261653	10.9992	3.31851	0.00438553	0.522994	1
ENSG00000169213	RAB3B	RAB3B_HUMAN	P20337	A_32_P18668	-0.223613	10.637	-3.31794	0.00439085	0.522994	1
ENSG00000198106	SNX29P2	S29P2_HUMAN	Q8IUI4	A_24_P263595	-0.213157	7.81323	-3.31543	0.00441403	0.523013	1
ENSG00000172530	BANP	BANP_HUMAN	Q8N9N5	A_24_P263595	-0.213157	7.81323	-3.31543	0.00441403	0.523013	1
ENSG00000257403	-	-	-	A_24_P263595	-0.213157	7.81323	-3.31543	0.00441403	0.523013	1
ENSG00000213538	-	-	-	A_24_P489695	-0.451475	9.80432	-3.31517	0.00441646	0.523013	1
ENSG00000170421	KRT8	K2C8_HUMAN	P05787	A_24_P489695	-0.451475	9.80432	-3.31517	0.00441646	0.523013	1
ENSG00000072201	LNX1	LNX1_HUMAN	Q8TBB1	A_23_P213137	0.233045	7.8131	3.31138	0.00445174	0.524867	1
ENSG00000196177	ACADSB	ACDSB_HUMAN	P45954	A_32_P61313	-0.302841	6.96576	-3.30901	0.0044739	0.524867	1
ENSG00000225981	-	-	-	A_32_P116391	0.27399	6.92041	3.30882	0.00447571	0.524867	1
ENSG00000205362	MT1A	MT1A_HUMAN	P04731	A_23_P54840	0.28103	12.217	3.30588	0.0045034	0.524867	1
ENSG00000260549	-	-	-	A_23_P54840	0.28103	12.217	3.30588	0.0045034	0.524867	1
ENSG00000205364	MT1M	MT1M_HUMAN	Q8N339	A_23_P54840	0.28103	12.217	3.30588	0.0045034	0.524867	1
ENSG00000183935	-	-	-	A_32_P174572	0.246641	8.22169	3.30502	0.00451157	0.524867	1
ENSG00000178130	-	-	-	A_32_P942508	0.268195	7.0639	3.30251	0.0045354	0.524867	1
ENSG00000090539	CHRD	CHRD_HUMAN	Q9H2X0	A_23_P502047	-0.247851	8.60662	-3.29904	0.0045686	0.524867	1
ENSG00000102001	CACNA1F	CAC1F_HUMAN	O60840	A_23_P148327	-0.212746	6.94837	-3.29834	0.00457535	0.524867	1
ENSG00000173567	GPR113	GP113_HUMAN	Q8IZF5	A_24_P85881	0.251284	7.12789	3.29465	0.00461093	0.524867	1
ENSG00000152601	MBNL1	MBNL1_HUMAN	Q9NR56	A_23_P357811	0.340358	8.25096	3.29082	0.00464812	0.527639	1
ENSG00000169715	MT1E	MT1E_HUMAN	P04732	A_23_P206724	0.706725	9.17479	3.28726	0.00468294	0.529752	1
ENSG00000109956	B3GAT1	B3GA1_HUMAN	Q9P2W7	A_23_P13232	0.238123	7.65584	3.28629	0.00469252	0.529752	1
ENSG00000116106	EPHA4	EPHA4_HUMAN	P54764	A_24_P274219	-0.234283	10.188	-3.27913	0.00476362	0.532831	1
ENSG00000169291	SHE	SHE_HUMAN	Q5VZ18	A_23_P400716	0.195591	6.96225	3.27851	0.00476979	0.532831	1
ENSG00000057294	PKP2	PKP2_HUMAN	Q99959	A_23_P162466	-0.272171	10.2076	-3.27832	0.00477166	0.532831	1
ENSG00000164761	TNFRSF11B	TR11B_HUMAN	O00300	A_23_P71530	-0.278225	9.96914	-3.27687	0.00478622	0.533009	1
ENSG00000173391	OLR1	OLR1_HUMAN	P78380	A_24_P124624	-0.330669	7.47403	-3.27524	0.00480267	0.533395	1
ENSG00000179008	C14orf39	S6OS1_HUMAN	Q8N1H7	A_23_P331196	-0.254855	6.99215	-3.27181	0.00483734	0.534752	1
ENSG00000179008	SIX6OS1	S6OS1_HUMAN	Q8N1H7	A_23_P331196	-0.254855	6.99215	-3.27181	0.00483734	0.534752	1
ENSG00000276161	-	-	-	A_23_P94579	0.318229	8.00949	3.27146	0.00484091	0.534752	1
ENSG00000233016	-	-	-	A_23_P94579	0.318229	8.00949	3.27146	0.00484091	0.534752	1
ENSG00000123094	C12orf2	RASF8_HUMAN	Q8NHQ8	A_24_P913561	-0.25492	8.33514	-3.2676	0.00488022	0.537648	1
ENSG00000123094	RASSF8	RASF8_HUMAN	Q8NHQ8	A_24_P913561	-0.25492	8.33514	-3.2676	0.00488022	0.537648	1
ENSG00000168137	SETD5	SETD5_HUMAN	Q9C0A6	A_23_P92035	-0.246105	10.1239	-3.26559	0.00490088	0.538038	1
ENSG00000150625	GPM6A	GPM6A_HUMAN	P51674	A_23_P121545	-0.239469	8.3309	-3.26215	0.00493636	0.539315	1
ENSG00000128394	APOBEC3F	ABC3F_HUMAN	Q8IUX4	A_23_P369966	0.263904	7.6514	3.26043	0.00495426	0.539315	1
ENSG00000150477	KIAA1328	K1328_HUMAN	Q86T90	A_32_P21807	0.254887	7.14286	3.25978	0.00496101	0.539315	1
ENSG00000241671	-	-	-	A_32_P21807	0.254887	7.14286	3.25978	0.00496101	0.539315	1
ENSG00000106258	CYP3A5	CP3A5_HUMAN	P20815	A_24_P915256	0.278	7.06985	3.25852	0.00497409	0.539315	1
ENSG00000106258	DKFZp686I18188	CP3A5_HUMAN	P20815	A_24_P915256	0.278	7.06985	3.25852	0.00497409	0.539315	1
ENSG00000260578	-	-	-	A_32_P4071	0.247699	6.95445	3.25453	0.00501591	0.540148	1
ENSG00000261269	-	-	-	A_32_P6646	-0.334472	7.00442	-3.25325	0.00502944	0.540148	1
ENSG00000174437	ATP2A2	AT2A2_HUMAN	P16615	A_24_P141786	-0.224019	9.70228	-3.25278	0.00503435	0.540148	1
ENSG00000101180	HRH3	HRH3_HUMAN	Q9Y5N1	A_23_P412990	-0.240107	7.08828	-3.24954	0.00506866	0.542363	1
ENSG00000105227	PRX	PRAX_HUMAN	Q9BXM0	A_24_P390909	-0.309602	6.99846	-3.24835	0.0050814	0.542363	1
ENSG00000140279	DUOX2	DUOX2_HUMAN	Q9NRD8	A_23_P151851	0.251198	7.04787	3.23958	0.00517566	0.544766	1
ENSG00000101109	STK4	STK4_HUMAN	Q13043	A_24_P935026	0.310359	7.33208	3.23935	0.00517823	0.544766	1
ENSG00000198315	ZKSCAN8	ZKSC8_HUMAN	Q15776	A_23_P214529	0.24713	7.05109	3.23779	0.0051952	0.544766	1
ENSG00000124019	FAM124B	F124B_HUMAN	Q9H5Z6	A_23_P39525	0.324708	7.7595	3.23772	0.00519596	0.544766	1
ENSG00000076924	-	-	-	A_24_P2093	-0.249687	8.36892	-3.23673	0.00520666	0.544766	1
ENSG00000116962	NID1	NID1_HUMAN	P14543	A_23_P200928	-0.219325	7.64886	-3.23575	0.00521742	0.544766	1
ENSG00000159212	CLIC6	CLIC6_HUMAN	Q96NY7	A_23_P385067	0.219466	7.37238	3.23522	0.00522322	0.544766	1
ENSG00000120875	DUSP4	DUS4_HUMAN	Q13115	A_23_P134935	-0.200508	12.0796	-3.23382	0.00523853	0.54498	1
ENSG00000100422	CERK	CERK1_HUMAN	Q8TCT0	A_24_P62237	-0.259734	10.8607	-3.23179	0.00526094	0.545929	1
ENSG00000022267	FHL1	FHL1_HUMAN	Q13642	A_23_P217326	-0.219035	8.42095	-3.22776	0.00530558	0.549175	1
ENSG00000104953	TLE6	TLE6_HUMAN	Q9H808	A_23_P426501	0.209947	8.44488	3.22204	0.00536957	0.552869	1
ENSG00000123684	LPGAT1	LGAT1_HUMAN	Q92604	A_23_P46606	-0.432033	11.3019	-3.21876	0.00540655	0.552869	1
ENSG00000075785	RAB7A	RAB7A_HUMAN	P51149	A_24_P234572	-0.232522	10.6987	-3.21859	0.00540855	0.552869	1
ENSG00000162078	ZG16B	ZG16B_HUMAN	Q96DA0	A_23_P106814	0.250386	7.63725	3.21537	0.00544516	0.554786	1
ENSG00000154358	OBSCN	OBSCN_HUMAN	Q5VST9	A_24_P359389	0.227734	6.89411	3.21177	0.00548633	0.554786	1
ENSG00000070961	ATP2B1	AT2B1_HUMAN	P20020	A_23_P128319	-0.243461	9.08933	-3.21026	0.00550372	0.554786	1
ENSG00000137857	DUOX1	DUOX1_HUMAN	Q9NRD9	A_23_P54291	0.260191	7.06141	3.20959	0.0055115	0.554786	1
ENSG00000099290	FAM21A	FA21A_HUMAN	Q641Q2	A_24_P677639	-0.306667	7.50479	-3.20957	0.00551177	0.554786	1
ENSG00000237840	-	-	-	A_24_P677639	-0.306667	7.50479	-3.20957	0.00551177	0.554786	1
ENSG00000172661	FAM21C	FA21C_HUMAN	Q9Y4E1	A_24_P677639	-0.306667	7.50479	-3.20957	0.00551177	0.554786	1
ENSG00000235618	-	-	-	A_24_P677639	-0.306667	7.50479	-3.20957	0.00551177	0.554786	1
ENSG00000120889	TNFRSF10B	TR10B_HUMAN	O14763	A_24_P218265	0.252327	11.8324	3.20788	0.00553128	0.554786	1
ENSG00000184005	ST6GALNAC3	SIA7C_HUMAN	Q8NDV1	A_23_P416711	0.251021	8.40033	3.20291	0.00558913	0.554786	1
ENSG00000161638	ITGA5	ITA5_HUMAN	P08648	A_23_P36562	-0.314359	11.4646	-3.20232	0.0055961	0.554786	1
ENSG00000186854	TRABD2A	TIKI1_HUMAN	Q86V40	A_23_P255896	-0.18778	7.19222	-3.20076	0.00561445	0.554786	1
ENSG00000059378	PARP12	PAR12_HUMAN	Q9H0J9	A_23_P111804	0.277641	8.26326	3.19995	0.00562396	0.554786	1
ENSG00000137720	C11orf1	CK001_HUMAN	Q9H5F2	A_24_P406939	-0.285624	6.82783	-3.19858	0.00564011	0.554786	1
ENSG00000135973	GPR45	GPR45_HUMAN	Q9Y5Y3	A_23_P131534	-0.268175	7.05638	-3.19842	0.00564199	0.554786	1
ENSG00000166736	HTR3A	5HT3A_HUMAN	P46098	A_23_P98399	0.252044	7.75158	3.19344	0.00570121	0.558951	1
ENSG00000071991	CDH19	CAD19_HUMAN	Q9H159	A_24_P342157	0.225434	7.01218	3.18938	0.00574984	0.558951	1
ENSG00000162817	C1orf115	CA115_HUMAN	Q9H7X2	A_23_P160433	-0.212879	7.63166	-3.189	0.00575446	0.558951	1
ENSG00000270107	-	-	-	A_32_P34703	-0.444949	7.10618	-3.18864	0.00575875	0.558951	1
ENSG00000265480	-	-	-	A_23_P373708	-0.283908	15.2231	-3.1879	0.00576766	0.558951	1
ENSG00000229590	-	-	-	A_32_P169179	0.411826	10.451	3.18745	0.00577317	0.558951	1
ENSG00000185630	PBX1	PBX1_HUMAN	P40424	A_32_P25397	0.246465	9.09278	3.18681	0.0057809	0.558951	1
ENSG00000114248	LRRC31	LRC31_HUMAN	Q6UY01	A_24_P240259	0.235668	6.97734	3.18327	0.00582393	0.56179	1
ENSG00000272442	-	-	-	A_23_P312874	0.203655	6.95011	3.17927	0.00587281	0.563845	1
ENSG00000249481	SPATS1	SPAS1_HUMAN	Q496A3	A_23_P312874	0.203655	6.95011	3.17927	0.00587281	0.563845	1
ENSG00000047578	KIAA0556	K0556_HUMAN	O60303	A_23_P381203	-0.215359	7.82237	-3.17772	0.00589192	0.563845	1
ENSG00000059769	DNAJC25	DJC25_HUMAN	Q9H1X3	A_23_P397019	0.198723	8.303	3.17751	0.00589451	0.563845	1
ENSG00000163686	ABHD6	ABHD6_HUMAN	Q9BV23	A_23_P211850	-0.34097	9.53959	-3.17657	0.00590617	0.563845	1
ENSG00000211598	IGKV4-1	KV401_HUMAN	P06312	A_32_P157927	0.232463	7.0043	3.17595	0.00591383	0.563845	1
ENSG00000164303	ENPP6	ENPP6_HUMAN	Q6UWR7	A_24_P397255	-0.297133	6.84861	-3.17048	0.00598195	0.566521	1
ENSG00000148700	ADD3	ADDG_HUMAN	Q9UEY8	A_24_P90097	0.20374	11.6861	3.17011	0.00598653	0.566521	1
ENSG00000158683	PKD1L1	PK1L1_HUMAN	Q8TDX9	A_23_P318432	0.258848	6.96027	3.16838	0.00600833	0.566521	1
ENSG00000123143	PKN1	PKN1_HUMAN	Q16512	A_23_P67271	-0.256	10.0228	-3.16753	0.00601904	0.566521	1
ENSG00000178202	KDELC2	KDEL2_HUMAN	Q7Z4H8	A_23_P388200	-0.282261	7.6301	-3.16668	0.00602971	0.566521	1
ENSG00000157404	KIT	KIT_HUMAN	P10721	A_23_P110253	-0.313971	11.4979	-3.1649	0.00605221	0.566521	1
ENSG00000183888	C1orf64	CA064_HUMAN	Q8NEQ6	A_32_P232455	0.251653	8.80443	3.16275	0.00607951	0.566521	1
ENSG00000091542	ALKBH5	ALKB5_HUMAN	Q6P6C2	A_23_P153050	-0.26036	9.84553	-3.16109	0.00610067	0.566521	1
ENSG00000177311	ZBTB38	ZBT38_HUMAN	Q8NAP3	A_24_P221323	-0.232558	7.65167	-3.15995	0.00611521	0.566521	1
ENSG00000124126	PREX1	PREX1_HUMAN	Q8TCU6	A_23_P413641	-0.294411	12.6256	-3.15787	0.00614184	0.566521	1
ENSG00000139287	TPH2	TPH2_HUMAN	Q8IWU9	A_24_P129834	-0.284591	6.9811	-3.15772	0.00614385	0.566521	1
ENSG00000183760	PAPL	-	-	A_24_P53406	0.208568	7.13427	3.15571	0.00616975	0.566521	1
ENSG00000165076	PRSS37	PRS37_HUMAN	A4D1T9	A_23_P93960	-0.251509	7.01588	-3.15565	0.0061705	0.566521	1
ENSG00000159527	PGLYRP3	PGRP3_HUMAN	Q96LB9	A_23_P96899	0.213303	7.08286	3.15537	0.00617412	0.566521	1
ENSG00000206418	RAB12	RAB12_HUMAN	Q6IQ22	A_24_P53353	-0.203289	7.96647	-3.15536	0.00617419	0.566521	1
ENSG00000104998	IL27RA	I27RA_HUMAN	Q6UWB1	A_23_P27606	-0.260628	10.0386	-3.15284	0.00620684	0.566521	1
ENSG00000081800	SLC13A1	S13A1_HUMAN	Q9BZW2	A_23_P71226	-0.233274	6.88255	-3.15258	0.00621027	0.566521	1
ENSG00000258828	-	-	-	A_24_P401124	-0.519306	10.9451	-3.15213	0.00621606	0.566521	1
ENSG00000183571	PGPEP1L	PGPIL_HUMAN	A6NFU8	A_32_P3534	-0.232351	7.19821	-3.14759	0.00627541	0.570517	1
ENSG00000145882	PCYOX1L	PCYXL_HUMAN	Q8NBM8	A_23_P30275	0.265782	9.92322	3.14443	0.00631702	0.570517	1
ENSG00000085552	IGSF9	TUTLA_HUMAN	Q9P2J2	A_23_P85441	0.230696	10.7482	3.1428	0.00633861	0.570517	1
ENSG00000268009	SSX4	SSX4_HUMAN	O60224	A_23_P33875	-0.358952	11.2959	-3.14077	0.00636561	0.570517	1
ENSG00000268009	SSX4B	SSX4_HUMAN	O60224	A_23_P33875	-0.358952	11.2959	-3.14077	0.00636561	0.570517	1
ENSG00000269791	SSX4	SSX4_HUMAN	O60224	A_23_P33875	-0.358952	11.2959	-3.14077	0.00636561	0.570517	1
ENSG00000269791	SSX4B	SSX4_HUMAN	O60224	A_23_P33875	-0.358952	11.2959	-3.14077	0.00636561	0.570517	1
ENSG00000160838	LRRC71	LRC71_HUMAN	Q8N4P6	A_23_P374919	0.214993	7.00179	3.14042	0.00637025	0.570517	1
ENSG00000079313	REXO1	REXO1_HUMAN	Q8N1G1	A_32_P390781	-0.206455	7.36563	-3.13991	0.00637707	0.570517	1
ENSG00000029534	ANK1	ANK1_HUMAN	P16157	A_24_P162485	0.316847	7.44659	3.1395	0.00638246	0.570517	1
ENSG00000108557	RAI1	RAI1_HUMAN	Q7Z5J4	A_23_P77807	-0.245874	7.75043	-3.13538	0.00643776	0.570517	1
ENSG00000234541	-	-	-	A_23_P109452	0.195159	9.84978	3.13458	0.00644843	0.570517	1
ENSG00000261405	-	-	-	A_23_P109452	0.195159	9.84978	3.13458	0.00644843	0.570517	1
ENSG00000275828	-	-	-	A_23_P109452	0.195159	9.84978	3.13458	0.00644843	0.570517	1
ENSG00000259156	-	-	-	A_23_P109452	0.195159	9.84978	3.13458	0.00644843	0.570517	1
ENSG00000183765	CHEK2	CHK2_HUMAN	O96017	A_23_P109452	0.195159	9.84978	3.13458	0.00644843	0.570517	1
ENSG00000235969	-	-	-	A_23_P109452	0.195159	9.84978	3.13458	0.00644843	0.570517	1
ENSG00000254835	-	-	-	A_23_P29215	-0.265269	7.00322	-3.1345	0.00644954	0.570517	1
ENSG00000258988	-	-	-	A_23_P35131	-0.200964	8.58653	-3.13403	0.00645585	0.570517	1
ENSG00000143368	SF3B4	SF3B4_HUMAN	Q15427	A_23_P35131	-0.200964	8.58653	-3.13403	0.00645585	0.570517	1
ENSG00000176049	JAKMIP2	JKIP2_HUMAN	Q96AA8	A_32_P21354	-0.22624	7.11032	-3.13247	0.00647703	0.570517	1
ENSG00000271079	CTAGE15	CTGEF_HUMAN	A4D2H0	A_24_P67280	0.21353	8.85885	3.13134	0.00649226	0.570517	1
ENSG00000271321	CTAGE6	CTGE6_HUMAN	Q86UF2	A_24_P67280	0.21353	8.85885	3.13134	0.00649226	0.570517	1
ENSG00000204165	CXorf65	CX065_HUMAN	A6NEN9	A_32_P101352	-0.281135	6.96849	-3.13096	0.00649751	0.570517	1
ENSG00000075618	FSCN1	FSCN1_HUMAN	Q16658	A_23_P168532	-0.2727	11.8117	-3.1273	0.00654734	0.573667	1
ENSG00000198431	TXNRD1	TRXR1_HUMAN	Q16881	A_23_P204581	-0.314832	8.63135	-3.12428	0.00658883	0.574079	1
ENSG00000178038	ALS2CL	AL2CL_HUMAN	Q60I27	A_23_P416705	0.230438	7.51537	3.12372	0.00659659	0.574079	1
ENSG00000089847	ANKRD24	ANR24_HUMAN	Q8TF21	A_32_P451874	-0.265387	7.20525	-3.1229	0.00660793	0.574079	1
ENSG00000196776	CD47	CD47_HUMAN	Q08722	A_23_P6935	0.247752	8.90169	3.11761	0.00668127	0.574648	1
ENSG00000118322	ATP10B	AT10B_HUMAN	O94823	A_23_P311901	-0.231297	7.0378	-3.11742	0.00668403	0.574648	1
ENSG00000138696	BMPR1B	BMR1B_HUMAN	O00238	A_32_P217901	-0.293451	8.47634	-3.11654	0.00669628	0.574648	1
ENSG00000230668	-	-	-	A_24_P753414	-0.238297	6.8136	-3.11639	0.00669838	0.574648	1
ENSG00000132872	SYT4	SYT4_HUMAN	Q9H2B2	A_23_P208030	0.361618	7.99364	3.11539	0.00671244	0.574653	1
ENSG00000104331	IMPAD1	IMPA3_HUMAN	Q9NX62	A_23_P383532	-0.224282	9.1284	-3.11439	0.0067264	0.574653	1
ENSG00000249346	-	-	-	A_32_P38153	0.279115	6.87253	3.10981	0.00679106	0.575389	1
ENSG00000152061	RABGAP1L	RBG10_HUMAN	B7ZAP0	A_23_P200325	0.249739	8.8687	3.10376	0.00687747	0.577327	1
ENSG00000152061	RABGAP1L	RBG1L_HUMAN	Q5R372	A_23_P200325	0.249739	8.8687	3.10376	0.00687747	0.577327	1
ENSG00000118420	UBE2CBP	UBE3D_HUMAN	Q7Z6J8	A_23_P365327	0.241005	6.95555	3.10308	0.00688722	0.577327	1
ENSG00000118420	UBE3D	UBE3D_HUMAN	Q7Z6J8	A_23_P365327	0.241005	6.95555	3.10308	0.00688722	0.577327	1
ENSG00000175567	UCP2	UCP2_HUMAN	P55851	A_23_P47704	-0.290146	11.7977	-3.10212	0.00690102	0.577327	1
ENSG00000232645	-	-	-	A_24_P659393	0.205794	7.06141	3.09804	0.00696013	0.577327	1
ENSG00000130726	TRIM28	TIF1B_HUMAN	Q13263	A_23_P89884	-0.239742	13.7381	-3.09487	0.00700637	0.577327	1
ENSG00000196123	KIAA0895L	K895L_HUMAN	Q68EN5	A_24_P922062	0.215759	7.25954	3.09366	0.00702406	0.577327	1
ENSG00000150676	CCDC83	CCD83_HUMAN	Q8IWF9	A_23_P356667	0.288303	6.94024	3.09326	0.00702998	0.577327	1
ENSG00000272134	-	-	-	A_24_P921186	0.233558	7.13932	3.09113	0.00706121	0.577327	1
ENSG00000122223	CD244	CD244_HUMAN	Q9BZW8	A_24_P105332	-0.255459	7.09608	-3.09089	0.00706482	0.577327	1
ENSG00000115306	SPTBN1	SPTB2_HUMAN	Q01082	A_23_P102523	-0.241888	9.16976	-3.09006	0.00707709	0.577327	1
ENSG00000139971	C14orf37	CN037_HUMAN	Q86TY3	A_24_P181295	-0.253882	8.98018	-3.0892	0.00708982	0.577327	1
ENSG00000162878	PKDCC	PKDCC_HUMAN	Q504Y2	A_32_P112493	-0.294651	10.8202	-3.08784	0.00710989	0.577327	1
ENSG00000170854	MINA	MINA_HUMAN	Q8IUF8	A_24_P388570	-0.195303	7.56699	-3.08777	0.00711097	0.577327	1
ENSG00000163755	HPS3	HPS3_HUMAN	Q969F9	A_23_P40817	0.271398	9.9998	3.08746	0.00711552	0.577327	1
ENSG00000095261	PSMD5	PSMD5_HUMAN	Q16401	A_23_P43434	-0.217521	8.24946	-3.08585	0.0071395	0.577327	1
ENSG00000244234	-	-	-	A_23_P425324	-0.314046	6.94819	-3.08493	0.00715323	0.577327	1
ENSG00000170837	GPR27	GPR27_HUMAN	Q9NS67	A_23_P211899	0.247452	10.132	3.08368	0.00717193	0.577327	1
ENSG00000100526	CDKN3	CDKN3_HUMAN	Q16667	A_23_P48669	0.230049	10.8354	3.08338	0.00717636	0.577327	1
ENSG00000086062	B4GALT1	B4GT1_HUMAN	P15291	A_23_P135271	-0.2132	8.52243	-3.08205	0.00719641	0.577327	1
ENSG00000104970	KIR3DX1	KI3X1_HUMAN	Q9H7L2	A_23_P398943	0.243455	7.01155	3.08037	0.00722159	0.577327	1
ENSG00000123685	BATF3	BATF3_HUMAN	Q9NR55	A_23_P160720	-0.305492	10.4078	-3.08005	0.00722639	0.577327	1
ENSG00000067082	KLF6	KLF6_HUMAN	Q99612	A_24_P932981	-0.241139	6.9807	-3.07466	0.00730822	0.577327	1
ENSG00000196139	AKR1C3	AK1C3_HUMAN	P42330	A_23_P138541	0.275157	9.05297	3.07197	0.00734928	0.577327	1
ENSG00000174500	GCSAM	GCSAM_HUMAN	Q8N6F7	A_23_P253250	-0.264317	7.07019	-3.07085	0.00736649	0.577327	1
ENSG00000106278	PTPRZ1	PTPRZ_HUMAN	P23471	A_23_P168761	0.44895	10.5199	3.07034	0.00737428	0.577327	1
ENSG00000276570	-	-	-	A_23_P108054	0.24381	8.73439	3.07031	0.00737482	0.577327	1
ENSG00000180089	TMEM86B	TM86B_HUMAN	Q8N661	A_23_P108054	0.24381	8.73439	3.07031	0.00737482	0.577327	1
ENSG00000116783	TNNI3K	TNI3K_HUMAN	Q59H18	A_23_P200024	0.239335	7.1459	3.06986	0.0073817	0.577327	1
ENSG00000259030	FPGT-TNNI3K	-	-	A_23_P200024	0.239335	7.1459	3.06986	0.0073817	0.577327	1
ENSG00000008083	JARID2	JARD2_HUMAN	Q92833	A_23_P214876	0.331588	12.218	3.06946	0.00738784	0.577327	1
ENSG00000168394	TAP1	TAP1_HUMAN	Q03518	A_23_P59005	0.385319	9.50194	3.06922	0.00739153	0.577327	1
ENSG00000118257	NRP2	NRP2_HUMAN	O60462	A_23_P209669	-0.267074	10.8669	-3.06857	0.0074016	0.577327	1
ENSG00000006606	CCL26	CCL26_HUMAN	Q9Y258	A_23_P215484	0.254279	8.23203	3.06603	0.00744096	0.577327	1
ENSG00000183578	TNFAIP8L3	TP8L3_HUMAN	Q5GJ75	A_32_P59010	0.347243	6.98117	3.06535	0.00745154	0.577327	1
ENSG00000268734	-	-	-	A_24_P185516	0.229396	7.01786	3.06396	0.0074732	0.577327	1
ENSG00000101203	COL20A1	COKA1_HUMAN	Q9P218	A_32_P185637	0.232387	7.2	3.06328	0.00748368	0.577327	1
ENSG00000205358	MT1H	MT1H_HUMAN	P80294	A_23_P163782	0.493864	10.0823	3.06067	0.00752461	0.577327	1
ENSG00000205364	MT1M	MT1M_HUMAN	Q8N339	A_23_P163782	0.493864	10.0823	3.06067	0.00752461	0.577327	1
ENSG00000244020	MT1HL1	M1BL1_HUMAN	P0DM35	A_23_P163782	0.493864	10.0823	3.06067	0.00752461	0.577327	1
ENSG00000114745	GORASP1	GORS1_HUMAN	Q9BQQ3	A_23_P427114	-0.228906	7.47115	-3.06037	0.0075293	0.577327	1
ENSG00000227012	-	-	-	A_32_P143153	0.231322	7.34074	3.06029	0.00753058	0.577327	1
ENSG00000135697	BCO1	BCDO1_HUMAN	Q9HAY6	A_23_P124300	-0.217666	7.08707	-3.05808	0.0075653	0.577327	1
ENSG00000280000	-	-	-	A_32_P29551	0.194846	7.07606	3.05644	0.00759124	0.577327	1
ENSG00000118729	CASQ2	CASQ2_HUMAN	O14958	A_23_P126582	0.276685	6.96656	3.05547	0.00760666	0.577327	1
ENSG00000134121	CHL1	NCHL1_HUMAN	O00533	A_24_P63178	0.313477	6.92302	3.05504	0.00761336	0.577327	1
ENSG00000111642	CHD4	CHD4_HUMAN	Q14839	A_23_P53541	-0.265726	11.5532	-3.05497	0.00761457	0.577327	1
ENSG00000268416	-	-	-	A_24_P913716	0.286937	10.4131	3.0536	0.00763629	0.577327	1
ENSG00000188386	PPP3R2	CANB2_HUMAN	Q96LZ3	A_23_P9348	0.209137	7.37013	3.05319	0.00764281	0.577327	1
ENSG00000261404	-	-	-	A_32_P218293	0.25101	7.08324	3.04736	0.0077363	0.583317	1
ENSG00000253701	-	-	-	A_24_P395415	0.217259	6.93447	3.04589	0.00775996	0.583484	1
ENSG00000125257	ABCC4	MRP4_HUMAN	O15439	A_23_P25559	-0.277319	8.66468	-3.04479	0.00777784	0.583484	1
ENSG00000180011	ZADH2	ZADH2_HUMAN	Q8N4Q0	A_32_P177300	-0.243351	7.08302	-3.04439	0.00778432	0.583484	1
ENSG00000204475	NCR3	NCTR3_HUMAN	O14931	A_32_P468522	0.21715	7.39086	3.04327	0.00780253	0.583484	1
ENSG00000180730	SHISA2	SHSA2_HUMAN	Q6UWI4	A_32_P427150	-0.33311	8.84601	-3.04284	0.0078095	0.583484	1
ENSG00000184613	NELL2	NELL2_HUMAN	Q99435	A_23_P10025	0.270048	10.5787	3.04141	0.00783285	0.584125	1
ENSG00000184434	LRRC19	LRC19_HUMAN	Q9H756	A_23_P364625	-0.259742	6.99164	-3.04003	0.00785534	0.584125	1
ENSG00000197408	CYP2B6	CP2B6_HUMAN	P20813	A_24_P339514	0.349278	8.16957	3.03894	0.00787325	0.584125	1
ENSG00000256612	-	-	-	A_24_P339514	0.349278	8.16957	3.03894	0.00787325	0.584125	1
ENSG00000155903	RASA2	RASA2_HUMAN	Q15283	A_23_P91964	-0.212157	8.3625	-3.03797	0.00788917	0.584125	1
ENSG00000259917	-	-	-	A_32_P109572	-0.213009	12.209	-3.03453	0.00794586	0.585786	1
ENSG00000268738	HSFX1	HSFX1_HUMAN	Q9UBD0	A_23_P96497	-0.223802	7.38446	-3.03267	0.00797671	0.585786	1
ENSG00000268738	HSFX2	HSFX1_HUMAN	Q9UBD0	A_23_P96497	-0.223802	7.38446	-3.03267	0.00797671	0.585786	1
ENSG00000171116	HSFX1	HSFX1_HUMAN	Q9UBD0	A_23_P96497	-0.223802	7.38446	-3.03267	0.00797671	0.585786	1
ENSG00000171116	HSFX2	HSFX1_HUMAN	Q9UBD0	A_23_P96497	-0.223802	7.38446	-3.03267	0.00797671	0.585786	1
ENSG00000168803	ADAL	ADAL_HUMAN	Q6DHV7	A_32_P221694	-0.214546	7.7484	-3.0323	0.00798287	0.585786	1
ENSG00000140030	GPR65	PSYR_HUMAN	Q8IYL9	A_32_P65804	-0.254435	7.0675	-3.03062	0.00801085	0.586057	1
ENSG00000026559	KCNG1	KCNG1_HUMAN	Q9UIX4	A_24_P237117	-0.252107	8.41389	-3.03024	0.00801717	0.586057	1
ENSG00000010404	IDS	IDS_HUMAN	P22304	A_32_P38345	0.253042	7.11044	3.02935	0.00803203	0.586057	1
ENSG00000109572	CLCN3	CLCN3_HUMAN	P51790	A_24_P114671	-0.223369	7.54361	-3.02549	0.00809692	0.586057	1
ENSG00000279926	-	-	-	A_23_P428465	-0.213175	6.92291	-3.02487	0.00810739	0.586057	1
ENSG00000113389	NPR3	ANPRC_HUMAN	P17342	A_23_P253536	-0.250692	6.92882	-3.02452	0.00811329	0.586057	1
ENSG00000142910	TINAGL1	TINAL_HUMAN	Q9GZM7	A_24_P199774	0.19275	7.47842	3.02391	0.00812359	0.586057	1
ENSG00000215910	C1orf167	CA167_HUMAN	Q5SNV9	A_32_P60145	0.25659	8.621	3.02272	0.00814373	0.586057	1
ENSG00000261329	-	-	-	A_32_P162746	-0.278373	9.37701	-3.02253	0.008147	0.586057	1
ENSG00000240694	PNMA2	PNMA2_HUMAN	Q9UL42	A_24_P389415	0.231061	8.74647	3.02081	0.00817624	0.586057	1
ENSG00000105699	LSR	LSR_HUMAN	Q86X29	A_23_P142389	-0.206681	10.9841	-3.01943	0.00819975	0.586057	1
ENSG00000151812	SLC35F4	S35F4_HUMAN	A4IF30	A_23_P163075	-0.331939	6.91412	-3.01938	0.00820049	0.586057	1
ENSG00000231538	-	-	-	A_32_P40235	-0.282748	6.93054	-3.01815	0.00822155	0.586542	1
ENSG00000183876	ARSI	ARSI_HUMAN	Q5FYB1	A_23_P19030	-0.279542	9.14805	-3.01643	0.00825101	0.587623	1
ENSG00000113369	ARRDC3	ARRD3_HUMAN	Q96B67	A_24_P414553	-0.195866	7.20632	-3.01398	0.00829334	0.589616	1
ENSG00000182568	SATB1	SATB1_HUMAN	Q01826	A_23_P259741	-0.22084	9.78783	-3.00993	0.00836349	0.590734	1
ENSG00000214851	-	-	-	A_23_P342398	-0.281067	6.97024	-3.00844	0.0083894	0.590734	1
ENSG00000196935	SRGAP1	SRGP1_HUMAN	Q7Z6B7	A_24_P922261	0.385122	7.7429	3.00815	0.00839449	0.590734	1
ENSG00000140557	ST8SIA2	SIA8B_HUMAN	Q92186	A_24_P664850	-0.238183	7.04331	-3.00774	0.00840156	0.590734	1
ENSG00000158748	HTR6	5HT6R_HUMAN	P50406	A_23_P74766	0.246388	7.00267	3.00728	0.00840969	0.590734	1
ENSG00000203859	HSD3B2	3BHS2_HUMAN	P26439	A_23_P51580	-0.214005	7.1184	-3.00597	0.0084326	0.591332	1
ENSG00000136155	SCEL	SCEL_HUMAN	O95171	A_23_P500000	-0.342278	7.96181	-3.00279	0.0084886	0.591653	1
ENSG00000102921	N4BP1	N4BP1_HUMAN	O75113	A_23_P66085	-0.186238	8.43601	-3.00273	0.00848964	0.591653	1
ENSG00000106006	HOXA6	HXA6_HUMAN	P31267	A_23_P82370	0.236794	6.96124	3.00136	0.00851387	0.591653	1
ENSG00000182165	-	-	-	A_23_P145895	0.223332	10.4906	3.00074	0.00852485	0.591653	1
ENSG00000115129	TP53I3	QORX_HUMAN	Q53FA7	A_23_P5392	0.245205	10.4744	2.99881	0.00855913	0.591653	1
ENSG00000122557	HERPUD2	HERP2_HUMAN	Q9BSE4	A_23_P168490	-0.197059	8.5932	-2.99821	0.00856991	0.591653	1
ENSG00000116031	CD207	CLC4K_HUMAN	Q9UJ71	A_23_P39790	-0.203156	7.01498	-2.99818	0.00857048	0.591653	1
ENSG00000221866	PLXNA4	PLXA4_HUMAN	Q9HCM2	A_24_P265051	-0.227725	9.56554	-2.99758	0.00858115	0.591653	1
ENSG00000141028	-	-	-	A_24_P756766	-0.205524	7.04386	-2.99609	0.00860774	0.592492	1
ENSG00000223510	CDRT15	CDRTF_HUMAN	Q96T59	A_24_P756766	-0.205524	7.04386	-2.99609	0.00860774	0.592492	1
ENSG00000164342	TLR3	TLR3_HUMAN	O15455	A_23_P29922	0.244639	7.13743	2.9938	0.00864886	0.593335	1
ENSG00000184697	CLDN6	CLD6_HUMAN	P56747	A_23_P37942	-0.275601	13.4701	-2.9912	0.00869561	0.594557	1
ENSG00000146112	PPP1R18	PPR18_HUMAN	Q6NYC8	A_23_P331479	-0.203804	11.1805	-2.98839	0.00874668	0.596065	1
ENSG00000124507	PACSIN1	PACN1_HUMAN	Q9BY11	A_24_P149266	-0.278873	11.2957	-2.9849	0.0088103	0.596466	1
ENSG00000087088	BAX	BAX_HUMAN	Q07812	A_23_P208706	0.201404	13.4437	2.98436	0.00882017	0.596466	1
ENSG00000162994	CLHC1	CLHC1_HUMAN	Q8NHS4	A_23_P257417	0.195397	7.93344	2.98009	0.00889888	0.596466	1
ENSG00000160014	CALM1	CALM_HUMAN	P62158	A_23_P4944	-0.249712	13.3265	-2.97938	0.00891206	0.596466	1
ENSG00000160014	CALM2	CALM_HUMAN	P62158	A_23_P4944	-0.249712	13.3265	-2.97938	0.00891206	0.596466	1
ENSG00000160014	CALM3	CALM_HUMAN	P62158	A_23_P4944	-0.249712	13.3265	-2.97938	0.00891206	0.596466	1
ENSG00000183780	SLC35F3	S35F3_HUMAN	Q8IY50	A_23_P422212	-0.277923	11.1669	-2.97893	0.00892034	0.596466	1
ENSG00000154040	CABYR	CABYR_HUMAN	O75952	A_23_P314712	0.261738	10.2579	2.97559	0.00898245	0.596466	1
ENSG00000173473	SMARCC1	SMRC1_HUMAN	Q92922	A_23_P83453	-0.189857	11.9775	-2.97557	0.00898286	0.596466	1
ENSG00000172935	MRGPRF	MRGRF_HUMAN	Q96AM1	A_23_P432573	0.319842	10.5118	2.97429	0.00900665	0.596466	1
ENSG00000235626	-	-	-	A_24_P161827	-0.306937	13.3488	-2.97357	0.00902031	0.596466	1
ENSG00000186431	FCAR	FCAR_HUMAN	P24071	A_24_P348265	-0.347107	7.07338	-2.97254	0.00903946	0.596466	1
ENSG00000078804	TP53INP2	T53I2_HUMAN	Q8IXH6	A_24_P357465	-0.232329	8.36606	-2.97236	0.00904295	0.596466	1
ENSG00000164465	DCBLD1	DCBD1_HUMAN	Q8N8Z6	A_23_P409462	-0.21073	7.98884	-2.97185	0.00905246	0.596466	1
ENSG00000136542	GALNT5	GALT5_HUMAN	Q7Z7M9	A_24_P408736	0.23232	7.00998	2.97155	0.00905815	0.596466	1
ENSG00000279824	-	-	-	A_32_P142635	-0.28323	7.01267	-2.97143	0.00906048	0.596466	1
ENSG00000279346	-	-	-	A_32_P142635	-0.28323	7.01267	-2.97143	0.00906048	0.596466	1
ENSG00000006125	AP2B1	AP2B1_HUMAN	P63010	A_24_P253827	-0.221952	10.6232	-2.97088	0.00907076	0.596466	1
ENSG00000162745	OLFML2B	OLM2B_HUMAN	Q68BL8	A_24_P248345	0.241289	7.10263	2.96984	0.00909042	0.596466	1
ENSG00000234215	-	-	-	A_32_P130872	0.219286	7.20962	2.96698	0.00914445	0.596466	1
ENSG00000168003	SLC3A2	4F2_HUMAN	P08195	A_23_P87216	-0.218994	15.5638	-2.96544	0.00917383	0.596466	1
ENSG00000102158	MAGT1	MAGT1_HUMAN	Q9H0U3	A_23_P148273	-0.201634	9.7333	-2.96477	0.00918669	0.596466	1
ENSG00000185168	-	-	-	A_24_P323084	0.21936	7.51205	2.96352	0.00921053	0.596466	1
ENSG00000127585	FBXL16	FXL16_HUMAN	Q8N461	A_23_P406385	0.259765	10.5028	2.96314	0.00921778	0.596466	1
ENSG00000165591	FAAH2	FAAH2_HUMAN	Q6GMR7	A_23_P113471	0.205212	9.26771	2.9619	0.00924158	0.596466	1
ENSG00000064419	TNPO3	TNPO3_HUMAN	Q9Y5L0	A_23_P42563	-0.244682	9.48034	-2.96013	0.0092756	0.596466	1
ENSG00000149257	SERPINH1	SERPH_HUMAN	P50454	A_23_P76006	-0.289059	11.6247	-2.95986	0.00928065	0.596466	1
ENSG00000277856	-	-	-	A_24_P590547	-0.292111	6.94552	-2.95924	0.00929269	0.596466	1
ENSG00000111913	FAM65B	FA65B_HUMAN	Q9Y4F9	A_24_P941359	0.304529	8.49533	2.95914	0.00929469	0.596466	1
ENSG00000257815	-	-	-	A_32_P36136	0.172567	9.179	2.959	0.00929734	0.596466	1
ENSG00000254285	-	-	-	A_32_P175098	-0.432398	13.668	-2.95779	0.00932072	0.596466	1
ENSG00000074964	ARHGEF10L	ARGAL_HUMAN	Q9HCE6	A_23_P382	0.252407	10.41	2.95763	0.00932374	0.596466	1
ENSG00000265087	-	-	-	A_23_P251680	0.272328	7.96675	2.95695	0.00933699	0.596466	1
ENSG00000093010	COMT	COMT_HUMAN	P21964	A_23_P251680	0.272328	7.96675	2.95695	0.00933699	0.596466	1
ENSG00000132510	KDM6B	KDM6B_HUMAN	O15054	A_24_P942630	-0.201536	8.09061	-2.95693	0.00933729	0.596466	1
ENSG00000113532	ST8SIA4	SIA8D_HUMAN	Q92187	A_23_P361984	-0.229827	8.89266	-2.95675	0.00934077	0.596466	1
ENSG00000186472	PCLO	PCLO_HUMAN	Q9Y6V0	A_23_P70983	0.264386	7.40604	2.95615	0.00935242	0.596466	1
ENSG00000187824	TMEM220	TM220_HUMAN	Q6QAJ8	A_24_P783433	0.199995	6.95169	2.95526	0.00936972	0.596466	1
ENSG00000105245	NUMBL	NUMBL_HUMAN	Q9Y6R0	A_23_P164733	-0.191682	7.95901	-2.95271	0.00941952	0.596466	1
ENSG00000186073	C15orf41	CO041_HUMAN	Q9Y2V0	A_23_P77201	0.222421	8.81857	2.95249	0.0094238	0.596466	1
ENSG00000132640	BTBD3	BTBD3_HUMAN	Q9Y2F9	A_23_P102759	-0.209577	8.90991	-2.95197	0.00943395	0.596466	1
ENSG00000090621	PABPC4	PABP4_HUMAN	Q13310	A_23_P51718	-0.236065	9.04103	-2.95157	0.00944184	0.596466	1
ENSG00000179397	C1orf101	CA101_HUMAN	Q5SY80	A_32_P228067	0.231063	7.11651	2.9513	0.00944706	0.596466	1
ENSG00000107614	DKFZp686N1286	TRDMT_HUMAN	O14717	A_24_P252705	0.209394	8.41488	2.94908	0.00949069	0.596466	1
ENSG00000107614	TRDMT1	TRDMT_HUMAN	O14717	A_24_P252705	0.209394	8.41488	2.94908	0.00949069	0.596466	1
ENSG00000169903	TM4SF4	T4S4_HUMAN	P48230	A_23_P252432	-0.217689	6.9818	-2.94726	0.00952663	0.596466	1
ENSG00000109943	CRTAM	CRTAM_HUMAN	O95727	A_23_P305092	-0.219675	6.96999	-2.94714	0.00952903	0.596466	1
ENSG00000181938	GINS3	PSF3_HUMAN	Q9BRX5	A_24_P159323	-0.198366	7.63152	-2.94658	0.00953998	0.596466	1
ENSG00000143127	ITGA10	ITA10_HUMAN	O75578	A_23_P138289	-0.226561	6.88014	-2.94559	0.00955976	0.596466	1
ENSG00000156475	PPP2R2B	2ABB_HUMAN	Q00005	A_23_P213620	0.428359	9.95792	2.94363	0.00959861	0.596466	1
ENSG00000144524	COPS7B	CSN7B_HUMAN	Q9H9Q2	A_23_P79725	-0.208492	8.62037	-2.94306	0.00960995	0.596466	1
ENSG00000170412	GPRC5C	GPC5C_HUMAN	Q9NQ84	A_23_P346673	-0.212141	7.58506	-2.94264	0.00961843	0.596466	1
ENSG00000127329	PTPRB	PTPRB_HUMAN	P23467	A_24_P661612	-0.258456	6.96528	-2.94173	0.00963647	0.596466	1
ENSG00000108384	RAD51C	RA51C_HUMAN	O43502	A_32_P24359	0.284141	7.23146	2.94143	0.00964249	0.596466	1
ENSG00000010379	SLC6A13	S6A13_HUMAN	Q9NSD5	A_24_P923483	0.219656	7.28023	2.94093	0.0096525	0.596466	1
ENSG00000169083	AR	ANDR_HUMAN	P10275	A_23_P113111	0.289083	8.25514	2.93896	0.00969201	0.597826	1
ENSG00000171208	NETO2	NETO2_HUMAN	Q8NC67	A_32_P77989	-0.273027	9.45286	-2.93824	0.00970651	0.597826	1
ENSG00000132164	SLC6A11	S6A11_HUMAN	P48066	A_23_P418562	0.267814	6.95479	2.93766	0.00971815	0.597826	1
ENSG00000120756	PLS1	PLSI_HUMAN	Q14651	A_23_P211909	0.2599	8.56098	2.93287	0.00981515	0.600348	1
ENSG00000173432	SAA1	SAA1_HUMAN	P0DJI8	A_23_P75830	0.244223	6.97264	2.93275	0.00981767	0.600348	1
ENSG00000248583	-	-	-	A_32_P79190	0.225233	7.39751	2.93191	0.00983471	0.600348	1
ENSG00000232471	-	-	-	A_32_P79190	0.225233	7.39751	2.93191	0.00983471	0.600348	1
ENSG00000279208	-	-	-	A_32_P79190	0.225233	7.39751	2.93191	0.00983471	0.600348	1
ENSG00000237961	-	-	-	A_32_P79190	0.225233	7.39751	2.93191	0.00983471	0.600348	1
ENSG00000184261	KCNK12	KCNKC_HUMAN	Q9HB15	A_23_P108883	-0.302197	11.5548	-2.93145	0.00984422	0.600348	1
ENSG00000180178	-	-	-	A_24_P508103	0.202733	7.68447	2.92976	0.00987865	0.600348	1
ENSG00000178162	-	-	-	A_24_P508103	0.202733	7.68447	2.92976	0.00987865	0.600348	1
ENSG00000180104	EXOC3	EXOC3_HUMAN	O60645	A_23_P389676	0.262722	7.9848	2.92926	0.00988886	0.600348	1
ENSG00000198650	TAT	ATTY_HUMAN	P17735	A_24_P923028	-0.223404	6.99889	-2.92781	0.00991877	0.600348	1
ENSG00000120137	PANK3	PANK3_HUMAN	Q9H999	A_24_P311845	-0.302299	9.47945	-2.92707	0.009934	0.600348	1
ENSG00000103316	CRYM	CRYM_HUMAN	Q14894	A_23_P77731	0.30541	11.0084	2.92518	0.00997287	0.600348	1
ENSG00000081138	CDH7	CADH7_HUMAN	Q9ULB5	A_23_P153146	-0.197698	7.26254	-2.92518	0.00997288	0.600348	1
ENSG00000163792	TCF23	TCF23_HUMAN	Q7RTU1	A_24_P237936	0.239712	7.07786	2.92501	0.00997648	0.600348	1
ENSG00000059804	SLC2A3	GTR3_HUMAN	P11169	A_24_P81900	-0.259104	12.732	-2.92455	0.00998595	0.600348	1
ENSG00000164091	WDR82	WDR82_HUMAN	Q6UXN9	A_23_P109877	-0.207402	10.1429	-2.92455	0.00998605	0.600348	1
ENSG00000164736	SOX17	SOX17_HUMAN	Q9H6I2	A_23_P82775	-0.202627	15.3668	-2.92347	0.0100084	0.600348	1
ENSG00000138032	PPM1B	PPM1B_HUMAN	O75688	A_23_P209269	0.249316	11.0579	2.9233	0.0100118	0.600348	1
ENSG00000179342	-	-	-	A_24_P127159	-0.206105	7.63122	-2.92281	0.0100221	0.600348	1
ENSG00000140105	WARS	SYWC_HUMAN	P23381	A_23_P65651	-0.264831	13.0035	-2.92155	0.0100483	0.60044	1
ENSG00000129197	RPAIN	RIP_HUMAN	Q86UA6	A_24_P307785	0.360321	8.38181	2.92133	0.0100529	0.60044	1
ENSG00000112365	ZBTB24	ZBT24_HUMAN	O43167	A_23_P134147	0.195289	9.83767	2.91742	0.0101346	0.601821	1
ENSG00000106665	CLIP2	CLIP2_HUMAN	Q9UDT6	A_23_P215479	-0.220079	11.3328	-2.91449	0.0101962	0.601826	1
ENSG00000236044	-	-	-	A_23_P59877	0.251357	14.3135	2.91446	0.010197	0.601826	1
ENSG00000234964	-	-	-	A_23_P59877	0.251357	14.3135	2.91446	0.010197	0.601826	1
ENSG00000164687	FABP5	FABP5_HUMAN	Q01469	A_23_P59877	0.251357	14.3135	2.91446	0.010197	0.601826	1
ENSG00000274068	-	-	-	A_23_P337292	0.325653	6.95224	2.91392	0.0102083	0.601826	1
ENSG00000162641	AKNAD1	AKND1_HUMAN	Q5T1N1	A_23_P337292	0.325653	6.95224	2.91392	0.0102083	0.601826	1
ENSG00000166250	CLMP	CLMP_HUMAN	Q9H6B4	A_24_P270044	-0.31573	9.51607	-2.91107	0.0102688	0.601826	1
ENSG00000108849	PPY	PAHO_HUMAN	P01298	A_23_P207336	0.191188	7.49983	2.91104	0.0102694	0.601826	1
ENSG00000189252	SPANXN3	SPXN3_HUMAN	Q5MJ09	A_24_P91830	-0.251176	6.96473	-2.91022	0.0102869	0.601826	1
ENSG00000108384	RAD51C	RA51C_HUMAN	O43502	A_23_P207014	0.18202	10.2547	2.91003	0.0102909	0.601826	1
ENSG00000244560	-	-	-	A_23_P254442	0.287751	8.5726	2.90966	0.0102987	0.601826	1
ENSG00000204946	ZNF783	ZN783_HUMAN	Q6ZMS7	A_23_P254442	0.287751	8.5726	2.90966	0.0102987	0.601826	1
ENSG00000003402	CFLAR	CFLAR_HUMAN	O15519	A_24_P120115	-0.226546	9.44012	-2.90929	0.0103067	0.601826	1
ENSG00000118777	ABCG2	ABCG2_HUMAN	Q9UNQ0	A_23_P18713	0.362482	8.94991	2.90852	0.0103231	0.601826	1
ENSG00000141380	SS18	SSXT_HUMAN	Q15532	A_23_P141738	-0.210229	10.1567	-2.90741	0.0103469	0.601826	1
ENSG00000275714	HIST1H3A	H31_HUMAN	P68431	A_23_P111037	0.177793	14.1338	2.90663	0.0103635	0.601826	1
ENSG00000275714	HIST1H3B	H31_HUMAN	P68431	A_23_P111037	0.177793	14.1338	2.90663	0.0103635	0.601826	1
ENSG00000275714	HIST1H3C	H31_HUMAN	P68431	A_23_P111037	0.177793	14.1338	2.90663	0.0103635	0.601826	1
ENSG00000275714	HIST1H3D	H31_HUMAN	P68431	A_23_P111037	0.177793	14.1338	2.90663	0.0103635	0.601826	1
ENSG00000275714	HIST1H3E	H31_HUMAN	P68431	A_23_P111037	0.177793	14.1338	2.90663	0.0103635	0.601826	1
ENSG00000275714	HIST1H3F	H31_HUMAN	P68431	A_23_P111037	0.177793	14.1338	2.90663	0.0103635	0.601826	1
ENSG00000275714	HIST1H3G	H31_HUMAN	P68431	A_23_P111037	0.177793	14.1338	2.90663	0.0103635	0.601826	1
ENSG00000275714	HIST1H3H	H31_HUMAN	P68431	A_23_P111037	0.177793	14.1338	2.90663	0.0103635	0.601826	1
ENSG00000275714	HIST1H3I	H31_HUMAN	P68431	A_23_P111037	0.177793	14.1338	2.90663	0.0103635	0.601826	1
ENSG00000275714	HIST1H3J	H31_HUMAN	P68431	A_23_P111037	0.177793	14.1338	2.90663	0.0103635	0.601826	1
ENSG00000261732	-	-	-	A_24_P51279	0.285889	7.77044	2.90612	0.0103744	0.601826	1
ENSG00000152223	EPG5	EPG5_HUMAN	Q9HCE0	A_24_P341923	0.225415	7.16786	2.90564	0.0103848	0.601826	1
ENSG00000108231	LGI1	LGI1_HUMAN	O95970	A_23_P127267	-0.258235	7.50364	-2.90542	0.0103895	0.601826	1
ENSG00000225849	-	-	-	A_32_P209624	-0.200616	8.6902	-2.90381	0.0104243	0.601826	1
ENSG00000133606	MKRN1	MKRN1_HUMAN	Q9UHC7	A_24_P29703	-0.259196	10.0766	-2.90257	0.010451	0.601826	1
ENSG00000113580	NR3C1	GCR_HUMAN	P04150	A_24_P214754	-0.183938	8.5937	-2.90246	0.0104534	0.601826	1
ENSG00000280278	-	-	-	A_23_P346327	-0.226084	7.07921	-2.90116	0.0104817	0.601826	1
ENSG00000163939	PBRM1	PB1_HUMAN	Q86U86	A_24_P362850	-0.167987	8.24742	-2.90029	0.0105006	0.601826	1
ENSG00000107165	TYRP1	TYRP1_HUMAN	P17643	A_23_P94403	0.224082	6.96146	2.89932	0.0105215	0.601826	1
ENSG00000254621	-	-	-	A_24_P796274	-0.210379	10.638	-2.89884	0.010532	0.601826	1
ENSG00000170425	ADORA2B	AA2BR_HUMAN	P29275	A_23_P55477	0.215097	8.28856	2.89838	0.010542	0.601826	1
ENSG00000079335	CDC14A	CC14A_HUMAN	Q9UNH5	A_23_P424472	-0.234133	7.17163	-2.89835	0.0105428	0.601826	1
ENSG00000138483	CCDC54	CCD54_HUMAN	Q8NEL0	A_23_P109964	0.239261	7.04541	2.89663	0.0105804	0.601826	1
ENSG00000166848	TERF2IP	TE2IP_HUMAN	Q9NYB0	A_23_P129704	-0.190193	10.5906	-2.89509	0.0106142	0.601826	1
ENSG00000270172	-	-	-	A_32_P98979	-0.277773	8.80991	-2.89493	0.0106177	0.601826	1
ENSG00000170955	PRKCDBP	PRDBP_HUMAN	Q969G5	A_24_P215352	-0.297833	10.9907	-2.8936	0.0106468	0.601826	1
ENSG00000145832	SLC25A48	S2548_HUMAN	Q6ZT89	A_23_P7719	-0.172383	7.3105	-2.89164	0.0106902	0.601826	1
ENSG00000164403	SHROOM1	SHRM1_HUMAN	Q2M3G4	A_23_P404902	0.19945	7.33175	2.89084	0.0107078	0.601826	1
ENSG00000226387	-	-	-	A_32_P159083	-0.268167	6.99581	-2.89084	0.0107078	0.601826	1
ENSG00000163687	DNASE1L3	DNSL3_HUMAN	Q13609	A_23_P257993	-0.254166	7.4588	-2.88896	0.0107494	0.601826	1
ENSG00000269210	-	-	-	A_24_P349750	0.252535	7.16447	2.88871	0.0107551	0.601826	1
ENSG00000173581	CCDC106	CC106_HUMAN	Q9BWC9	A_23_P16197	-0.18836	9.08343	-2.88798	0.0107713	0.601826	1
ENSG00000101871	MID1	TRI18_HUMAN	O15344	A_23_P170037	0.29452	10.4778	2.88729	0.0107867	0.601826	1
ENSG00000125447	GGA3	GGA3_HUMAN	Q9NZ52	A_23_P38181	0.208997	10.5279	2.88672	0.0107994	0.601826	1
ENSG00000182871	COL18A1	COIA1_HUMAN	P39060	A_23_P211212	0.190321	15.6252	2.88632	0.0108084	0.601826	1
ENSG00000254376	-	-	-	A_24_P925186	-0.260247	7.08984	-2.88499	0.0108381	0.601826	1
ENSG00000215417	-	-	-	A_32_P139196	0.329661	9.11172	2.88382	0.0108645	0.601826	1
ENSG00000204389	HSPA1A	HSP71_HUMAN	P08107	A_24_P123616	-0.254984	10.0154	-2.88334	0.0108753	0.601826	1
ENSG00000204389	HSPA1B	HSP71_HUMAN	P08107	A_24_P123616	-0.254984	10.0154	-2.88334	0.0108753	0.601826	1
ENSG00000204388	HSPA1A	HSP71_HUMAN	P08107	A_24_P123616	-0.254984	10.0154	-2.88334	0.0108753	0.601826	1
ENSG00000204388	HSPA1B	HSP71_HUMAN	P08107	A_24_P123616	-0.254984	10.0154	-2.88334	0.0108753	0.601826	1
ENSG00000234506	-	-	-	A_32_P17504	-0.223118	7.60136	-2.88299	0.0108831	0.601826	1
ENSG00000230793	-	-	-	A_23_P333063	-0.23757	9.80759	-2.88187	0.0109083	0.601826	1
ENSG00000264058	KRT222	KT222_HUMAN	Q8N1A0	A_23_P333063	-0.23757	9.80759	-2.88187	0.0109083	0.601826	1
ENSG00000073584	SMARCE1	SMCE1_HUMAN	Q969G3	A_23_P333063	-0.23757	9.80759	-2.88187	0.0109083	0.601826	1
ENSG00000107338	SHB	SHB_HUMAN	Q15464	A_23_P257743	-0.251797	9.3271	-2.88142	0.0109185	0.601826	1
ENSG00000152683	SLC30A6	ZNT6_HUMAN	Q6NXT4	A_24_P342807	0.262384	7.64319	2.88051	0.010939	0.601826	1
ENSG00000059588	TARBP1	TARB1_HUMAN	Q13395	A_23_P52058	0.217359	8.91755	2.87883	0.0109771	0.601826	1
ENSG00000166974	MAPRE2	MARE2_HUMAN	Q15555	A_24_P193911	0.21447	7.12688	2.87786	0.0109992	0.601826	1
ENSG00000087116	ADAMTS2	ATS2_HUMAN	O95450	A_23_P213615	-0.188537	7.29666	-2.87772	0.0110023	0.601826	1
ENSG00000256797	KLRF2	KLRF2_HUMAN	D3W0D1	A_24_P824642	0.214287	6.82589	2.87724	0.0110132	0.601826	1
ENSG00000067365	METTL22	MET22_HUMAN	Q9BUU2	A_24_P934473	0.201284	7.15479	2.87703	0.011018	0.601826	1
ENSG00000182752	PAPPA	PAPP1_HUMAN	Q13219	A_23_P351270	0.237594	6.99658	2.87682	0.0110229	0.601826	1
ENSG00000072609	CHFR	CHFR_HUMAN	Q96EP1	A_23_P344037	-0.210221	10.1008	-2.87675	0.0110243	0.601826	1
ENSG00000177707	PVRL3	PVRL3_HUMAN	Q9NQS3	A_23_P80759	0.33298	8.6794	2.87316	0.0111064	0.60236	1
ENSG00000116132	PRRX1	PRRX1_HUMAN	P54821	A_23_P502731	-0.224381	6.9598	-2.8717	0.0111399	0.60236	1
ENSG00000165807	PPP1R36	PPR36_HUMAN	Q96LQ0	A_23_P309973	-0.196675	7.069	-2.87169	0.0111402	0.60236	1
ENSG00000207422	-	-	-	A_32_P190211	-0.193288	7.0466	-2.87163	0.0111416	0.60236	1
ENSG00000228144	-	-	-	A_23_P25097	0.199866	10.4819	2.87143	0.0111464	0.60236	1
ENSG00000139233	LLPH	LLPH_HUMAN	Q9BRT6	A_23_P25097	0.199866	10.4819	2.87143	0.0111464	0.60236	1
ENSG00000213100	-	-	-	A_24_P584463	-0.277267	15.2112	-2.87038	0.0111704	0.60236	1
ENSG00000169116	PARM1	PARM1_HUMAN	Q6UWI2	A_24_P191781	0.255871	7.46934	2.87029	0.0111727	0.60236	1
ENSG00000057149	SERPINB3	SPB3_HUMAN	P29508	A_23_P55632	0.498997	7.96239	2.86927	0.0111961	0.60236	1
ENSG00000175664	TEX26	TEX26_HUMAN	Q8N6G2	A_23_P312271	0.211821	6.94627	2.86914	0.0111991	0.60236	1
ENSG00000151948	GLT1D1	GL1D1_HUMAN	Q96MS3	A_32_P19294	-0.222211	11.7032	-2.86835	0.0112175	0.602564	1
ENSG00000155506	LARP1	LARP1_HUMAN	Q6PKG0	A_24_P7211	-0.420871	8.99699	-2.86479	0.0113003	0.605095	1
ENSG00000159176	CSRP1	CSRP1_HUMAN	P21291	A_24_P225448	-0.26093	7.54269	-2.86442	0.0113088	0.605095	1
ENSG00000116774	OLFML3	OLFL3_HUMAN	Q9NRN5	A_24_P11315	0.367268	8.91791	2.86283	0.0113461	0.606303	1
ENSG00000163349	HIPK1	HIPK1_HUMAN	Q86Z02	A_24_P11315	0.367268	8.91791	2.86283	0.0113461	0.606303	1
ENSG00000159618	GPR114	GP114_HUMAN	Q8IZF4	A_23_P206290	0.244529	9.3163	2.86133	0.0113814	0.606766	1
ENSG00000234645	-	-	-	A_32_P39216	-0.184913	10.8029	-2.86075	0.0113948	0.606766	1
ENSG00000148516	ZEB1	ZEB1_HUMAN	P37275	A_23_P202013	-0.202833	7.10575	-2.86057	0.0113991	0.606766	1
ENSG00000145536	ADAMTS16	ATS16_HUMAN	Q8TE57	A_23_P41629	-0.243428	7.5832	-2.85745	0.0114727	0.607675	1
ENSG00000159674	SPON2	SPON2_HUMAN	Q9BUD6	A_23_P121533	0.376053	9.57642	2.85678	0.0114888	0.607675	1
ENSG00000175471	MCTP1	MCTP1_HUMAN	Q6DN14	A_24_P212481	0.301549	7.22053	2.85595	0.0115083	0.607675	1
ENSG00000196967	ZNF585A	Z585A_HUMAN	Q6P3V2	A_24_P267522	-0.202183	7.31649	-2.85553	0.0115183	0.607675	1
ENSG00000106367	AP1S1	AP1S1_HUMAN	P61966	A_23_P157404	0.225414	9.18711	2.85414	0.0115516	0.607675	1
ENSG00000064655	EYA2	EYA2_HUMAN	O00167	A_23_P500421	-0.295032	11.3626	-2.85403	0.0115541	0.607675	1
ENSG00000257335	MGAM	MGA_HUMAN	O43451	A_23_P42897	0.197223	6.9336	2.85345	0.0115678	0.607675	1
ENSG00000116721	PRAMEF1	PRAM1_HUMAN	O95521	A_24_P657487	0.283161	7.0683	2.85227	0.0115961	0.607675	1
ENSG00000089012	SIRPG	SIRPG_HUMAN	Q9P1W8	A_23_P28857	-0.235744	6.96643	-2.85137	0.0116177	0.607675	1
ENSG00000165588	OTX2	OTX2_HUMAN	P32243	A_23_P48663	-0.336356	11.5471	-2.85031	0.0116431	0.607675	1
ENSG00000150627	WDR17	WDR17_HUMAN	Q8IZU2	A_24_P91985	-0.231878	6.89574	-2.85024	0.0116449	0.607675	1
ENSG00000185920	PTCH1	PTC1_HUMAN	Q13635	A_24_P106910	-0.20088	7.94803	-2.84991	0.0116528	0.607675	1
ENSG00000269404	SPIB	SPIB_HUMAN	Q01892	A_23_P27668	-0.174299	7.42815	-2.84905	0.0116733	0.607976	1
ENSG00000142539	-	-	-	A_23_P27668	-0.174299	7.42815	-2.84905	0.0116733	0.607976	1
ENSG00000197734	C14orf178	CN178_HUMAN	Q8N769	A_23_P379692	-0.273902	6.97005	-2.8477	0.0117061	0.608179	1
ENSG00000101197	BIRC7	BIRC7_HUMAN	Q96CA5	A_23_P79769	-0.24225	7.29198	-2.84767	0.0117068	0.608179	1
ENSG00000164076	CAMKV	CAMKV_HUMAN	Q8NCB2	A_23_P29680	0.30126	8.34082	2.84416	0.0117918	0.61165	1
ENSG00000164761	TNFRSF11B	TR11B_HUMAN	O00300	A_24_P192485	-0.263969	11.1395	-2.84368	0.0118034	0.61165	1
ENSG00000102996	MMP15	MMP15_HUMAN	P51511	A_23_P100177	-0.265797	9.23201	-2.84222	0.011839	0.612125	1
ENSG00000100416	TRMU	MTU1_HUMAN	O75648	A_24_P916195	-0.231022	9.7217	-2.84028	0.0118865	0.612125	1
ENSG00000177432	NAP1L5	NP1L5_HUMAN	Q96NT1	A_24_P166073	0.184989	7.29996	2.83964	0.0119023	0.612125	1
ENSG00000141338	ABCA8	ABCA8_HUMAN	O94911	A_23_P118615	0.210699	7.02224	2.83948	0.0119063	0.612125	1
ENSG00000106018	VIPR2	VIPR2_HUMAN	P41587	A_32_P153071	-0.242095	7.62766	-2.83854	0.0119293	0.612125	1
ENSG00000139899	CBLN3	CBLN3_HUMAN	Q6UW01	A_23_P3159	0.198982	7.13566	2.83658	0.0119777	0.612125	1
ENSG00000164362	TERT	TERT_HUMAN	O14746	A_23_P110851	0.215104	9.31294	2.83554	0.0120033	0.612125	1
ENSG00000197665	-	-	-	A_23_P4052	0.268981	10.2358	2.83388	0.0120445	0.612125	1
ENSG00000228157	-	-	-	A_23_P4052	0.268981	10.2358	2.83388	0.0120445	0.612125	1
ENSG00000173421	CCDC36	CCD36_HUMAN	Q8IYA8	A_32_P461386	0.263205	7.0147	2.83339	0.0120566	0.612125	1
ENSG00000234829	IFNA17	IFN17_HUMAN	P01571	A_23_P20704	0.278517	6.92409	2.83181	0.0120961	0.612125	1
ENSG00000186803	IFNA10	IFN10_HUMAN	P01566	A_23_P20704	0.278517	6.92409	2.83181	0.0120961	0.612125	1
ENSG00000168438	CDC40	PRP17_HUMAN	O60508	A_23_P351320	-0.278726	9.30575	-2.83035	0.0121325	0.612125	1
ENSG00000183783	KCTD8	KCTD8_HUMAN	Q6ZWB6	A_23_P94902	0.214502	7.41093	2.82971	0.0121486	0.612125	1
ENSG00000279730	-	-	-	A_32_P191859	-0.173571	9.2453	-2.8292	0.0121613	0.612125	1
ENSG00000183955	SETD8	SETD8_HUMAN	Q9NQR1	A_32_P191859	-0.173571	9.2453	-2.8292	0.0121613	0.612125	1
ENSG00000258951	-	-	-	A_24_P195164	-0.267225	14.5168	-2.82876	0.0121724	0.612125	1
ENSG00000237016	-	-	-	A_24_P281285	-0.211096	6.91925	-2.82822	0.0121858	0.612125	1
ENSG00000117983	MUC5B	MUC5B_HUMAN	Q9HC84	A_24_P102650	0.208035	6.91048	2.82787	0.0121947	0.612125	1
ENSG00000187479	C11orf96	CK096_HUMAN	Q7Z7L8	A_32_P74409	0.289123	8.3485	2.82734	0.012208	0.612125	1
ENSG00000207846	-	-	-	A_24_P230057	-0.266673	13.7087	-2.82363	0.0123016	0.612125	1
ENSG00000214720	-	-	-	A_24_P230057	-0.266673	13.7087	-2.82363	0.0123016	0.612125	1
ENSG00000163440	PDCL2	PDCL2_HUMAN	Q8N4E4	A_23_P363301	-0.188203	7.1677	-2.82264	0.0123267	0.612125	1
ENSG00000134531	EMP1	EMP1_HUMAN	P54849	A_24_P923095	-0.172154	7.01559	-2.82194	0.0123445	0.612125	1
ENSG00000121691	CAT	CATA_HUMAN	P04040	A_23_P105138	-0.225496	7.96282	-2.82116	0.0123644	0.612125	1
ENSG00000275243	TRBV16	-	-	A_24_P740958	0.204052	6.95576	2.8203	0.0123863	0.612125	1
ENSG00000170484	KRT74	K2C74_HUMAN	Q7RTS7	A_23_P379147	0.220311	7.0136	2.82005	0.0123926	0.612125	1
ENSG00000164385	C6orf195	CF195_HUMAN	Q96MT4	A_23_P308042	-0.273077	6.87769	-2.81996	0.0123951	0.612125	1
ENSG00000102804	TSC22D1	T22D1_HUMAN	Q15714	A_24_P193257	0.192977	8.13157	2.81638	0.0124867	0.612125	1
ENSG00000254321	-	-	-	A_32_P59693	-0.225812	7.05095	-2.81501	0.0125221	0.612125	1
ENSG00000145555	MYO10	MYO10_HUMAN	Q9HD67	A_23_P7596	-0.211185	13.4908	-2.81494	0.0125238	0.612125	1
ENSG00000177238	TRIM72	TRI72_HUMAN	Q6ZMU5	A_32_P429687	-0.232107	6.94709	-2.81451	0.0125349	0.612125	1
ENSG00000163806	SPDYA	SPDYA_HUMAN	Q5MJ70	A_23_P425579	-0.204544	7.07012	-2.81382	0.0125528	0.612125	1
ENSG00000163507	KIAA1524	CIP2A_HUMAN	Q8TCG1	A_23_P250313	0.177039	7.98532	2.81287	0.0125773	0.612125	1
ENSG00000090512	FETUB	FETUB_HUMAN	Q9UGM5	A_23_P144126	-0.205144	6.98291	-2.8126	0.0125843	0.612125	1
ENSG00000173193	PARP14	PAR14_HUMAN	Q460N5	A_23_P57983	0.23175	7.15358	2.81235	0.0125908	0.612125	1
ENSG00000185361	TNFAIP8L1	TP8L1_HUMAN	Q8WVP5	A_23_P119500	-0.222223	7.6781	-2.81218	0.0125951	0.612125	1
ENSG00000151883	PARP8	PARP8_HUMAN	Q8N3A8	A_23_P121898	0.201981	8.75408	2.81187	0.0126034	0.612125	1
ENSG00000243064	-	-	-	A_23_P166207	-0.207931	7.11142	-2.81185	0.0126038	0.612125	1
ENSG00000145216	FIP1L1	FIP1_HUMAN	Q6UN15	A_24_P265162	-0.215925	8.12607	-2.81184	0.0126041	0.612125	1
ENSG00000197901	SLC22A6	S22A6_HUMAN	Q4U2R8	A_23_P98616	-0.228622	7.06086	-2.8116	0.0126103	0.612125	1
ENSG00000176371	ZSCAN2	ZSCA2_HUMAN	Q7Z7L9	A_23_P417372	0.240349	8.97317	2.81148	0.0126134	0.612125	1
ENSG00000169213	RAB3B	RAB3B_HUMAN	P20337	A_24_P548966	-0.288924	11.7015	-2.81137	0.0126163	0.612125	1
ENSG00000023839	ABCC2	MRP2_HUMAN	Q92887	A_23_P44569	0.199966	7.32946	2.81065	0.0126349	0.612125	1
ENSG00000267174	-	-	-	A_24_P255415	0.215169	7.05194	2.81041	0.0126413	0.612125	1
ENSG00000136866	ZFP37	ZFP37_HUMAN	Q9Y6Q3	A_23_P254025	-0.213448	7.51916	-2.81039	0.0126417	0.612125	1
ENSG00000103034	NDRG4	NDRG4_HUMAN	Q9ULP0	A_23_P140748	-0.199687	13.0666	-2.80867	0.0126865	0.612125	1
ENSG00000254692	TM9SF1	-	-	A_24_P142024	0.184288	11.7317	2.80853	0.0126902	0.612125	1
ENSG00000260669	-	-	-	A_24_P142024	0.184288	11.7317	2.80853	0.0126902	0.612125	1
ENSG00000254505	CHMP4A	CHM4A_HUMAN	Q9BY43	A_24_P142024	0.184288	11.7317	2.80853	0.0126902	0.612125	1
ENSG00000186469	GNG2	GBG2_HUMAN	P59768	A_32_P208403	0.281467	9.55792	2.80834	0.0126953	0.612125	1
ENSG00000175505	CLCF1	CLCF1_HUMAN	Q9UBD9	A_23_P138760	0.18275	8.06964	2.80809	0.0127018	0.612125	1
ENSG00000184349	EFNA5	EFNA5_HUMAN	P52803	A_24_P645914	-0.205273	10.4771	-2.80696	0.0127313	0.612125	1
ENSG00000255073	ZFP91-CNTF	-	-	A_24_P56052	-0.203669	9.61257	-2.8066	0.0127408	0.612125	1
ENSG00000186660	ZFP91	ZFP91_HUMAN	Q96JP5	A_24_P56052	-0.203669	9.61257	-2.8066	0.0127408	0.612125	1
ENSG00000227855	-	-	-	A_24_P911310	0.206669	7.05557	2.80624	0.0127503	0.612125	1
ENSG00000265899	-	-	-	A_24_P255954	-0.275145	14.7344	-2.80607	0.0127547	0.612125	1
ENSG00000214533	-	-	-	A_24_P255954	-0.275145	14.7344	-2.80607	0.0127547	0.612125	1
ENSG00000011105	TSPAN9	TSN9_HUMAN	O75954	A_24_P218905	-0.230807	7.62645	-2.80564	0.012766	0.612125	1
ENSG00000068137	PLEKHH3	PKHH3_HUMAN	Q7Z736	A_32_P172188	0.2198	10.6431	2.80332	0.0128269	0.613617	1
ENSG00000156140	ADAMTS3	ATS3_HUMAN	O15072	A_24_P140405	-0.250915	7.5684	-2.80027	0.0129079	0.616055	1
ENSG00000024422	EHD2	EHD2_HUMAN	Q9NZN4	A_24_P156113	0.226423	10.718	2.79808	0.012966	0.617397	1
ENSG00000134595	SOX3	SOX3_HUMAN	P41225	A_23_P85218	0.545332	10.0274	2.79578	0.0130275	0.618288	1
ENSG00000102554	KLF5	KLF5_HUMAN	Q13887	A_24_P210406	-0.268609	10.0671	-2.79483	0.013053	0.618288	1
ENSG00000141522	ARHGDIA	GDIR1_HUMAN	P52565	A_24_P366994	-0.203503	8.99177	-2.79463	0.0130584	0.618288	1
ENSG00000145721	LIX1	LIX1_HUMAN	Q8N485	A_32_P116606	0.217407	7.03468	2.79457	0.01306	0.618288	1
ENSG00000102021	LUZP4	LUZP4_HUMAN	Q9P127	A_23_P96611	-0.297638	7.06856	-2.79279	0.0131079	0.619842	1
ENSG00000102753	KPNA3	IMA4_HUMAN	O00505	A_23_P139950	-0.179971	9.46546	-2.79135	0.0131469	0.620032	1
ENSG00000149428	HYOU1	HYOU1_HUMAN	Q9Y4L1	A_23_P75647	-0.209029	9.79093	-2.79055	0.0131683	0.620032	1
ENSG00000179820	MYADM	MYADM_HUMAN	Q96S97	A_23_P27584	-0.208638	13.5241	-2.79003	0.0131825	0.620032	1
ENSG00000164816	DEFA5	DEF5_HUMAN	Q01523	A_23_P112086	-0.23431	6.89462	-2.78956	0.0131954	0.620032	1
ENSG00000066777	ARFGEF1	BIG1_HUMAN	Q9Y6D6	A_24_P599396	0.182039	7.31517	2.78929	0.0132025	0.620032	1
ENSG00000115525	ST3GAL5	SIAT9_HUMAN	Q9UNP4	A_23_P136573	-0.203501	8.92119	-2.78727	0.0132575	0.620226	1
ENSG00000115306	SPTBN1	SPTB2_HUMAN	Q01082	A_23_P339095	-0.22307	9.19169	-2.78644	0.0132802	0.620226	1
ENSG00000117013	KCNQ4	KCNQ4_HUMAN	P56696	A_23_P34424	-0.247134	7.16901	-2.78525	0.0133127	0.620226	1
ENSG00000171428	NAT1	ARY1_HUMAN	P18440	A_23_P95594	0.209589	8.79591	2.78517	0.0133149	0.620226	1
ENSG00000101180	HRH3	HRH3_HUMAN	Q9Y5N1	A_24_P301837	0.213565	7.25632	2.78435	0.0133372	0.620226	1
ENSG00000160882	CYP11B1	C11B1_HUMAN	P15538	A_24_P329424	0.240592	6.94922	2.78212	0.0133987	0.620226	1
ENSG00000163424	C3orf30	CC030_HUMAN	Q96M34	A_32_P72492	-0.278543	7.05997	-2.78102	0.013429	0.620226	1
ENSG00000185038	MROH2A	-	-	A_32_P427222	0.198508	6.9941	2.77869	0.0134933	0.620226	1
ENSG00000110713	NUP98	NUP98_HUMAN	P52948	A_23_P203586	-0.173603	11.0034	-2.77837	0.0135023	0.620226	1
ENSG00000165325	CCDC67	DEUP1_HUMAN	Q05D60	A_32_P153954	0.205262	6.98809	2.77772	0.0135201	0.620226	1
ENSG00000172456	FGGY	FGGY_HUMAN	Q96C11	A_32_P209094	0.196879	10.1499	2.77697	0.0135412	0.620226	1
ENSG00000164794	KCNV1	KCNV1_HUMAN	Q6PIU1	A_23_P146125	-0.28102	7.83469	-2.77609	0.0135657	0.620226	1
ENSG00000188525	-	-	-	A_24_P932646	0.235733	6.86686	2.7751	0.0135933	0.620226	1
ENSG00000255553	-	-	-	A_32_P87110	-0.227191	6.88463	-2.77466	0.0136054	0.620226	1
ENSG00000184470	TXNRD2	-	-	A_23_P102988	-0.189307	6.95202	-2.77452	0.0136093	0.620226	1
ENSG00000002834	LASP1	LASP1_HUMAN	Q14847	A_23_P89187	-0.20166	12.5602	-2.77419	0.0136186	0.620226	1
ENSG00000147162	OGT	OGT1_HUMAN	O15294	A_23_P381976	-0.190055	7.89598	-2.77397	0.0136247	0.620226	1
ENSG00000143321	HDGF	HDGF_HUMAN	P51858	A_24_P376707	-0.225071	13.224	-2.77394	0.0136257	0.620226	1
ENSG00000170265	ZNF282	ZN282_HUMAN	Q9UDV7	A_23_P311358	-0.225012	7.75362	-2.77366	0.0136336	0.620226	1
ENSG00000128617	OPN1SW	OPSB_HUMAN	P03999	A_23_P419156	-0.217043	6.93453	-2.77334	0.0136426	0.620226	1
ENSG00000278968	PRY	PRY_HUMAN	O14603	A_23_P11408	0.184575	7.01477	2.77317	0.0136472	0.620226	1
ENSG00000278968	PRY2	PRY_HUMAN	O14603	A_23_P11408	0.184575	7.01477	2.77317	0.0136472	0.620226	1
ENSG00000278968	PRYP3	PRY_HUMAN	O14603	A_23_P11408	0.184575	7.01477	2.77317	0.0136472	0.620226	1
ENSG00000278968	PRYP4	PRY_HUMAN	O14603	A_23_P11408	0.184575	7.01477	2.77317	0.0136472	0.620226	1
ENSG00000169763	PRY	PRY_HUMAN	O14603	A_23_P11408	0.184575	7.01477	2.77317	0.0136472	0.620226	1
ENSG00000169763	PRY2	PRY_HUMAN	O14603	A_23_P11408	0.184575	7.01477	2.77317	0.0136472	0.620226	1
ENSG00000169763	PRYP3	PRY_HUMAN	O14603	A_23_P11408	0.184575	7.01477	2.77317	0.0136472	0.620226	1
ENSG00000169763	PRYP4	PRY_HUMAN	O14603	A_23_P11408	0.184575	7.01477	2.77317	0.0136472	0.620226	1
ENSG00000279944	PRY	PRY_HUMAN	O14603	A_23_P11408	0.184575	7.01477	2.77317	0.0136472	0.620226	1
ENSG00000279944	PRY2	PRY_HUMAN	O14603	A_23_P11408	0.184575	7.01477	2.77317	0.0136472	0.620226	1
ENSG00000279944	PRYP3	PRY_HUMAN	O14603	A_23_P11408	0.184575	7.01477	2.77317	0.0136472	0.620226	1
ENSG00000279944	PRYP4	PRY_HUMAN	O14603	A_23_P11408	0.184575	7.01477	2.77317	0.0136472	0.620226	1
ENSG00000172283	PRY	PRY_HUMAN	O14603	A_23_P11408	0.184575	7.01477	2.77317	0.0136472	0.620226	1
ENSG00000172283	PRY2	PRY_HUMAN	O14603	A_23_P11408	0.184575	7.01477	2.77317	0.0136472	0.620226	1
ENSG00000172283	PRYP3	PRY_HUMAN	O14603	A_23_P11408	0.184575	7.01477	2.77317	0.0136472	0.620226	1
ENSG00000172283	PRYP4	PRY_HUMAN	O14603	A_23_P11408	0.184575	7.01477	2.77317	0.0136472	0.620226	1
ENSG00000169807	PRY	PRY_HUMAN	O14603	A_23_P11408	0.184575	7.01477	2.77317	0.0136472	0.620226	1
ENSG00000169807	PRY2	PRY_HUMAN	O14603	A_23_P11408	0.184575	7.01477	2.77317	0.0136472	0.620226	1
ENSG00000169807	PRYP3	PRY_HUMAN	O14603	A_23_P11408	0.184575	7.01477	2.77317	0.0136472	0.620226	1
ENSG00000169807	PRYP4	PRY_HUMAN	O14603	A_23_P11408	0.184575	7.01477	2.77317	0.0136472	0.620226	1
ENSG00000169789	PRY	PRY_HUMAN	O14603	A_23_P11408	0.184575	7.01477	2.77317	0.0136472	0.620226	1
ENSG00000169789	PRY2	PRY_HUMAN	O14603	A_23_P11408	0.184575	7.01477	2.77317	0.0136472	0.620226	1
ENSG00000169789	PRYP3	PRY_HUMAN	O14603	A_23_P11408	0.184575	7.01477	2.77317	0.0136472	0.620226	1
ENSG00000169789	PRYP4	PRY_HUMAN	O14603	A_23_P11408	0.184575	7.01477	2.77317	0.0136472	0.620226	1
ENSG00000273748	-	-	-	A_24_P497437	-0.344945	7.02623	-2.77204	0.0136789	0.620226	1
ENSG00000280297	-	-	-	A_24_P497437	-0.344945	7.02623	-2.77204	0.0136789	0.620226	1
ENSG00000144045	DQX1	DQX1_HUMAN	Q8TE96	A_23_P56659	0.195574	8.25576	2.76974	0.0137437	0.620226	1
ENSG00000150540	HNMT	HNMT_HUMAN	P50135	A_23_P56734	0.310046	8.48657	2.76936	0.0137543	0.620226	1
ENSG00000100196	KDELR3	ERD23_HUMAN	O43731	A_23_P211504	-0.226426	9.09315	-2.76894	0.0137663	0.620226	1
ENSG00000197467	COL13A1	CODA1_HUMAN	Q5TAT6	A_23_P1331	-0.247476	8.91912	-2.76887	0.0137683	0.620226	1
ENSG00000177733	HNRNPA0	ROA0_HUMAN	Q13151	A_24_P371670	-0.260247	11.2872	-2.76627	0.013842	0.620226	1
ENSG00000148926	ADM	ADML_HUMAN	P35318	A_23_P127948	0.250252	13.7922	2.76489	0.0138811	0.620226	1
ENSG00000130175	PRKCSH	GLU2B_HUMAN	P14314	A_24_P396197	-0.197372	11.0422	-2.76442	0.0138944	0.620226	1
ENSG00000111913	FAM65B	FA65B_HUMAN	Q9Y4F9	A_23_P215009	0.185246	8.22138	2.76435	0.0138965	0.620226	1
ENSG00000182107	TMEM30B	CC50B_HUMAN	Q3MIR4	A_32_P143377	-0.189961	7.66928	-2.76422	0.0139002	0.620226	1
ENSG00000170542	SERPINB9	SPB9_HUMAN	P50453	A_23_P30687	-0.372073	11.041	-2.76344	0.0139226	0.620226	1
ENSG00000159455	LCE2B	LCE2B_HUMAN	O14633	A_24_P207828	0.209243	7.13093	2.76219	0.0139584	0.620226	1
ENSG00000124215	CDH26	CAD26_HUMAN	Q8IXH8	A_23_P502957	-0.262737	7.99079	-2.76173	0.0139716	0.620226	1
ENSG00000080224	EPHA6	EPHA6_HUMAN	Q9UF33	A_23_P18342	-0.191364	6.70961	-2.76138	0.0139816	0.620226	1
ENSG00000186188	FFAR4	FFAR4_HUMAN	Q5NUL3	A_23_P104484	-0.238819	7.08109	-2.76104	0.0139912	0.620226	1
ENSG00000147010	SH3KBP1	SH3K1_HUMAN	Q96B97	A_24_P289139	-0.29485	8.8724	-2.76053	0.0140058	0.620226	1
ENSG00000177565	TBL1XR1	TBL1R_HUMAN	Q9BZK7	A_23_P212552	-0.18341	9.73688	-2.75967	0.0140308	0.620226	1
ENSG00000165152	TMEM246	TM246_HUMAN	Q9BRR3	A_24_P886096	0.205388	8.95874	2.75912	0.0140466	0.620226	1
ENSG00000188290	HES4	HES4_HUMAN	Q9HCC6	A_23_P149448	-0.309227	12.1589	-2.75908	0.0140475	0.620226	1
ENSG00000198363	ASPH	ASPH_HUMAN	Q12797	A_23_P216094	-0.24132	8.11025	-2.75882	0.014055	0.620226	1
ENSG00000149633	KIAA1755	K1755_HUMAN	Q5JYT7	A_32_P113971	-0.222145	6.99115	-2.75787	0.0140826	0.620226	1
ENSG00000133104	SPG20	SPG20_HUMAN	Q8N0X7	A_32_P12430	0.21012	8.72388	2.7576	0.0140905	0.620226	1
ENSG00000008513	ST3GAL1	SIA4A_HUMAN	Q11201	A_24_P46927	-0.198941	7.09182	-2.75718	0.0141026	0.620226	1
ENSG00000047936	ROS1	ROS1_HUMAN	P08922	A_23_P70278	-0.292796	6.98725	-2.75717	0.0141027	0.620226	1
ENSG00000111799	COL12A1	COCA1_HUMAN	Q99715	A_23_P214168	0.43929	8.32454	2.75717	0.0141027	0.620226	1
ENSG00000151835	SACS	SACS_HUMAN	Q9NZJ4	A_23_P128663	0.277386	10.4529	2.75573	0.0141446	0.620226	1
ENSG00000279220	-	-	-	A_32_P191200	0.261053	6.94015	2.75531	0.0141566	0.620226	1
ENSG00000258786	-	-	-	A_23_P65845	-0.263588	7.04558	-2.7551	0.0141628	0.620226	1
ENSG00000258494	-	-	-	A_23_P65845	-0.263588	7.04558	-2.7551	0.0141628	0.620226	1
ENSG00000135835	KIAA1614	K1614_HUMAN	Q5VZ46	A_32_P176594	-0.235973	6.99472	-2.7549	0.0141685	0.620226	1
ENSG00000203668	CHML	RAE2_HUMAN	P26374	A_24_P712350	0.286197	9.36557	2.7542	0.0141889	0.620226	1
ENSG00000140263	SORD	DHSO_HUMAN	Q00796	A_23_P77103	-0.300654	10.2046	-2.75366	0.0142047	0.620226	1
ENSG00000259479	-	-	-	A_23_P77103	-0.300654	10.2046	-2.75366	0.0142047	0.620226	1
ENSG00000174963	ZIC4	ZIC4_HUMAN	Q8N9L1	A_24_P217306	0.195211	7.05468	2.75319	0.0142185	0.620226	1
ENSG00000198417	MT1F	MT1F_HUMAN	P04733	A_23_P15174	0.48278	8.82538	2.75285	0.0142284	0.620226	1
ENSG00000218803	-	-	-	A_23_P58869	0.204857	7.29411	2.75263	0.0142347	0.620226	1
ENSG00000133703	KRAS	RASK_HUMAN	P01116	A_23_P45140	-0.273442	11.0685	-2.75245	0.0142401	0.620226	1
ENSG00000169306	IL1RAPL1	IRPL1_HUMAN	Q9NZN1	A_23_P84106	-0.18299	7.13268	-2.75154	0.0142666	0.620226	1
ENSG00000174437	ATP2A2	AT2A2_HUMAN	P16615	A_23_P53603	-0.184886	9.59347	-2.74991	0.0143144	0.620226	1
ENSG00000189013	KIR2DL4	KI2L4_HUMAN	Q99706	A_24_P288298	0.191236	6.99664	2.74783	0.0143755	0.620226	1
ENSG00000248712	CCDC153	CC153_HUMAN	Q494R4	A_24_P450285	0.208394	9.68966	2.74779	0.0143768	0.620226	1
ENSG00000268455	-	-	-	A_24_P717262	-0.198659	7.2274	-2.74766	0.0143805	0.620226	1
ENSG00000147065	MSN	MOES_HUMAN	P26038	A_23_P73589	-0.214832	13.2329	-2.74739	0.0143885	0.620226	1
ENSG00000153317	ASAP1	ASAP1_HUMAN	Q9ULH1	A_23_P44831	-0.176076	7.78288	-2.74733	0.0143904	0.620226	1
ENSG00000185842	DNAH14	DYH14_HUMAN	Q0VDD8	A_24_P917290	0.235181	6.89148	2.7465	0.0144147	0.620226	1
ENSG00000141985	SH3GL1	SH3G1_HUMAN	Q99961	A_23_P208925	-0.26654	9.33257	-2.74614	0.0144254	0.620226	1
ENSG00000163959	SLC51A	OSTA_HUMAN	Q86UW1	A_24_P385732	0.212116	7.58843	2.74461	0.0144708	0.620226	1
ENSG00000116191	RALGPS2	RGPS2_HUMAN	Q86X27	A_24_P173746	-0.159892	8.36179	-2.74395	0.0144904	0.620226	1
ENSG00000205517	RGL3	RGL3_HUMAN	Q3MIN7	A_23_P107903	0.353506	11.0257	2.74303	0.0145176	0.620226	1
ENSG00000138111	TMEM180	TM180_HUMAN	Q14CX5	A_23_P337729	0.283918	9.67102	2.74248	0.014534	0.620226	1
ENSG00000153531	ADPRHL1	ARHL1_HUMAN	Q8NDY3	A_23_P48438	0.270257	8.22727	2.74188	0.0145519	0.620226	1
ENSG00000230438	-	-	-	A_32_P183918	0.249144	7.08492	2.74181	0.0145541	0.620226	1
ENSG00000059728	MXD1	MAD1_HUMAN	Q05195	A_23_P408094	-0.217065	7.49214	-2.74118	0.0145728	0.620226	1
ENSG00000118564	FBXL5	FBXL5_HUMAN	Q9UKA1	A_23_P213247	0.200347	10.9285	2.74102	0.0145776	0.620226	1
ENSG00000167680	SEMA6B	SEM6B_HUMAN	Q9H3T3	A_23_P208900	-0.205108	9.34827	-2.74094	0.0145801	0.620226	1
ENSG00000157557	ETS2	ETS2_HUMAN	P15036	A_24_P382661	-0.239818	10.2709	-2.73961	0.0146197	0.620337	1
ENSG00000181744	C3orf58	DIA1_HUMAN	Q8NDZ4	A_23_P144134	-0.198381	8.30284	-2.73889	0.0146414	0.620337	1
ENSG00000250504	-	-	-	A_24_P42136	-0.24316	15.066	-2.73883	0.014643	0.620337	1
ENSG00000034239	EFCAB1	EFCB1_HUMAN	Q9HAE3	A_23_P146294	-0.312912	7.09634	-2.73823	0.0146612	0.620464	1
ENSG00000120029	C10orf76	CJ076_HUMAN	Q5T2E6	A_23_P86504	0.199917	10.6808	2.73488	0.014762	0.620819	1
ENSG00000171368	TPPP	TPPP_HUMAN	O94811	A_23_P58671	0.208788	7.14265	2.73483	0.0147636	0.620819	1
ENSG00000178531	CTXN1	CTXN1_HUMAN	P60606	A_32_P155016	-0.222738	10.4074	-2.73455	0.0147722	0.620819	1
ENSG00000188596	CFAP54	-	-	A_24_P936899	0.2176	6.94871	2.73402	0.0147882	0.620819	1
ENSG00000232098	-	-	-	A_32_P516215	0.357661	7.07714	2.73269	0.0148285	0.620819	1
ENSG00000266028	SRGAP2	-	-	A_32_P15498	-0.357588	10.0587	-2.73249	0.0148347	0.620819	1
ENSG00000196369	SRGAP2B	SRG2B_HUMAN	P0DMP2	A_32_P15498	-0.357588	10.0587	-2.73249	0.0148347	0.620819	1
ENSG00000171943	SRGAP2C	SRG2C_HUMAN	P0DJJ0	A_32_P15498	-0.357588	10.0587	-2.73249	0.0148347	0.620819	1
ENSG00000255986	-	-	-	A_23_P414343	0.49118	10.3196	2.73244	0.014836	0.620819	1
ENSG00000100890	KIAA0391	MRRP3_HUMAN	O15091	A_24_P390315	-0.205011	7.32382	-2.73154	0.0148634	0.620819	1
ENSG00000225366	-	-	-	A_32_P135985	-0.237702	13.3607	-2.73146	0.0148659	0.620819	1
ENSG00000241186	TDGF1	TDGF1_HUMAN	P13385	A_32_P135985	-0.237702	13.3607	-2.73146	0.0148659	0.620819	1
ENSG00000124507	PACSIN1	PACN1_HUMAN	Q9BY11	A_23_P258088	-0.268297	12.9027	-2.7308	0.014886	0.621026	1
ENSG00000134443	GRP	GRP_HUMAN	P07492	A_23_P101131	-0.27976	8.58659	-2.72951	0.0149254	0.621406	1
ENSG00000009724	MASP2	MASP2_HUMAN	O00187	A_23_P301971	-0.170159	7.6636	-2.72617	0.0150279	0.624408	1
ENSG00000135074	ADAM19	ADA19_HUMAN	Q9H013	A_23_P374082	-0.204959	14.8236	-2.72534	0.0150533	0.624632	1
ENSG00000184117	NIPSNAP1	NIPS1_HUMAN	Q9BPW8	A_24_P237278	-0.276217	10.1134	-2.72484	0.0150686	0.624632	1
ENSG00000118257	NRP2	NRP2_HUMAN	O60462	A_23_P393727	-0.219267	8.70831	-2.72451	0.0150788	0.624632	1
ENSG00000154007	ASB17	ASB17_HUMAN	Q8WXJ9	A_23_P344444	0.289799	7.00078	2.7227	0.0151347	0.626314	1
ENSG00000169877	AHSP	AHSP_HUMAN	Q9NZD4	A_23_P135486	-0.221425	7.02819	-2.72096	0.0151887	0.627446	1
ENSG00000154589	LY96	LY96_HUMAN	Q9Y6Y9	A_23_P94230	0.263725	7.03488	2.72066	0.0151982	0.627446	1
ENSG00000172208	OR4X2	OR4X2_HUMAN	Q8NGF9	A_24_P349274	0.171881	7.221	2.72035	0.0152078	0.627446	1
ENSG00000279556	OR4X2	OR4X2_HUMAN	Q8NGF9	A_24_P349274	0.171881	7.221	2.72035	0.0152078	0.627446	1
ENSG00000122729	ACO1	ACOC_HUMAN	P21399	A_23_P9416	0.175057	11.7188	2.71913	0.0152457	0.628012	1
ENSG00000101146	RAE1	RAE1L_HUMAN	P78406	A_23_P6023	0.200788	7.8995	2.71893	0.0152521	0.628012	1
ENSG00000103023	PRSS54	PRS54_HUMAN	Q6PEW0	A_23_P88776	0.181697	6.88011	2.71699	0.0153126	0.628101	1
ENSG00000242779	-	-	-	A_24_P344516	0.219535	8.19089	2.71636	0.0153324	0.628101	1
ENSG00000171815	PCDHB1	PCDB1_HUMAN	Q9Y5F3	A_23_P110462	0.281816	6.99823	2.71545	0.015361	0.628101	1
ENSG00000152954	NRSN1	NRSN1_HUMAN	Q8IZ57	A_23_P255616	0.181894	7.00078	2.71544	0.0153613	0.628101	1
ENSG00000120055	C10orf95	CJ095_HUMAN	Q9H7T3	A_23_P138480	0.210355	7.33969	2.71202	0.0154692	0.629334	1
ENSG00000164845	-	-	-	A_32_P160039	0.184695	10.3522	2.71106	0.0154994	0.629334	1
ENSG00000156218	ADAMTSL3	ATL3_HUMAN	P82987	A_24_P400842	-0.211249	7.12867	-2.71061	0.0155136	0.629334	1
ENSG00000185261	KIAA0825	K0825_HUMAN	Q8IV33	A_23_P409663	-0.241515	7.12075	-2.71021	0.0155264	0.629334	1
ENSG00000148334	PTGES2	PGES2_HUMAN	Q9H7Z7	A_24_P106953	-0.210447	9.89352	-2.70947	0.0155501	0.629334	1
ENSG00000178031	ADAMTSL1	ATL1_HUMAN	Q8N6G6	A_23_P312415	0.215012	7.08203	2.70945	0.0155507	0.629334	1
ENSG00000133424	LARGE	LARGE_HUMAN	O95461	A_23_P91697	0.237008	10.2437	2.70872	0.0155739	0.629334	1
ENSG00000183918	SH2D1A	SH21A_HUMAN	O60880	A_24_P203103	0.22283	7.08666	2.70847	0.0155817	0.629334	1
ENSG00000115159	GPD2	GPDM_HUMAN	P43304	A_23_P119812	-0.1894	8.8124	-2.7083	0.0155873	0.629334	1
ENSG00000118507	AKAP7	AKA7A_HUMAN	O43687	A_23_P259594	0.167995	9.25953	2.70724	0.0156209	0.629334	1
ENSG00000099399	MAGEB2	MAGB2_HUMAN	O15479	A_23_P254831	-0.206624	7.33568	-2.70688	0.0156326	0.629334	1
ENSG00000025293	PHF20	PHF20_HUMAN	Q9BVI0	A_23_P210969	-0.170709	8.90626	-2.70636	0.0156493	0.629334	1
ENSG00000143515	ATP8B2	AT8B2_HUMAN	P98198	A_24_P117896	-0.244308	8.31655	-2.70562	0.0156728	0.629334	1
ENSG00000166396	SERPINB7	SPB7_HUMAN	O75635	A_23_P141802	0.27125	6.97199	2.70558	0.0156741	0.629334	1
ENSG00000181773	GPR3	GPR3_HUMAN	P46089	A_23_P35000	-0.182791	7.21256	-2.7045	0.0157089	0.629334	1
ENSG00000257093	KIAA1147	LCHN_HUMAN	A4D1U4	A_32_P24059	0.198742	7.89762	2.70393	0.0157271	0.629334	1
ENSG00000257093	LCHN	LCHN_HUMAN	A4D1U4	A_32_P24059	0.198742	7.89762	2.70393	0.0157271	0.629334	1
ENSG00000244701	-	-	-	A_32_P24059	0.198742	7.89762	2.70393	0.0157271	0.629334	1
ENSG00000267097	-	-	-	A_32_P179370	-0.204049	7.05203	-2.70393	0.0157272	0.629334	1
ENSG00000183307	CECR6	CECR6_HUMAN	Q9BXQ6	A_23_P259344	-0.230508	10.4635	-2.70348	0.0157415	0.629334	1
ENSG00000102970	CCL17	CCL17_HUMAN	Q92583	A_23_P26325	0.256982	7.16775	2.70299	0.0157572	0.629334	1
ENSG00000055732	MCOLN3	MCLN3_HUMAN	Q8TDD5	A_23_P12241	0.243093	7.27243	2.70226	0.0157807	0.629334	1
ENSG00000151834	GABRA2	GBRA2_HUMAN	P47869	A_23_P167121	-0.266447	7.07249	-2.70199	0.0157896	0.629334	1
ENSG00000196337	CGB	CGHB_HUMAN	P01233	A_24_P395814	0.269545	7.4572	2.6996	0.0158668	0.630337	1
ENSG00000196337	CGB5	CGHB_HUMAN	P01233	A_24_P395814	0.269545	7.4572	2.6996	0.0158668	0.630337	1
ENSG00000196337	CGB7	CGHB_HUMAN	P01233	A_24_P395814	0.269545	7.4572	2.6996	0.0158668	0.630337	1
ENSG00000196337	CGB8	CGHB_HUMAN	P01233	A_24_P395814	0.269545	7.4572	2.6996	0.0158668	0.630337	1
ENSG00000267631	CGB1	CGB1_HUMAN	A6NKQ9	A_24_P395814	0.269545	7.4572	2.6996	0.0158668	0.630337	1
ENSG00000267335	CGB1	-	-	A_24_P395814	0.269545	7.4572	2.6996	0.0158668	0.630337	1
ENSG00000104818	CGB2	-	-	A_24_P395814	0.269545	7.4572	2.6996	0.0158668	0.630337	1
ENSG00000104827	CGB	CGHB_HUMAN	P01233	A_24_P395814	0.269545	7.4572	2.6996	0.0158668	0.630337	1
ENSG00000104827	CGB5	CGHB_HUMAN	P01233	A_24_P395814	0.269545	7.4572	2.6996	0.0158668	0.630337	1
ENSG00000104827	CGB7	CGHB_HUMAN	P01233	A_24_P395814	0.269545	7.4572	2.6996	0.0158668	0.630337	1
ENSG00000104827	CGB8	CGHB_HUMAN	P01233	A_24_P395814	0.269545	7.4572	2.6996	0.0158668	0.630337	1
ENSG00000189052	CGB	CGHB_HUMAN	P01233	A_24_P395814	0.269545	7.4572	2.6996	0.0158668	0.630337	1
ENSG00000189052	CGB5	CGHB_HUMAN	P01233	A_24_P395814	0.269545	7.4572	2.6996	0.0158668	0.630337	1
ENSG00000189052	CGB7	CGHB_HUMAN	P01233	A_24_P395814	0.269545	7.4572	2.6996	0.0158668	0.630337	1
ENSG00000189052	CGB8	CGHB_HUMAN	P01233	A_24_P395814	0.269545	7.4572	2.6996	0.0158668	0.630337	1
ENSG00000213030	CGB	CGHB_HUMAN	P01233	A_24_P395814	0.269545	7.4572	2.6996	0.0158668	0.630337	1
ENSG00000213030	CGB5	CGHB_HUMAN	P01233	A_24_P395814	0.269545	7.4572	2.6996	0.0158668	0.630337	1
ENSG00000213030	CGB7	CGHB_HUMAN	P01233	A_24_P395814	0.269545	7.4572	2.6996	0.0158668	0.630337	1
ENSG00000213030	CGB8	CGHB_HUMAN	P01233	A_24_P395814	0.269545	7.4572	2.6996	0.0158668	0.630337	1
ENSG00000080503	SMARCA2	SMCA2_HUMAN	P51531	A_23_P60354	0.262048	7.40456	2.69931	0.0158761	0.630337	1
ENSG00000230521	-	-	-	A_32_P104088	0.203843	7.23629	2.69798	0.0159195	0.630945	1
ENSG00000250565	ATP6V1E2	VATE2_HUMAN	Q96A05	A_23_P143047	0.195277	8.74756	2.69767	0.0159296	0.630945	1
ENSG00000254838	-	-	-	A_23_P75848	-0.180436	6.98067	-2.69729	0.015942	0.630945	1
ENSG00000131626	PPFIA1	LIPA1_HUMAN	Q13136	A_23_P302116	-0.194614	9.44194	-2.69695	0.0159529	0.630945	1
ENSG00000153066	TXNDC11	TXD11_HUMAN	Q6PKC3	A_23_P14939	-0.178532	8.74375	-2.69481	0.0160229	0.633103	1
ENSG00000241484	ARHGAP8	RHG08_HUMAN	P85298	A_24_P85117	0.201111	7.54568	2.69323	0.0160745	0.634532	1
ENSG00000105429	MEGF8	MEGF8_HUMAN	Q7Z7M0	A_23_P67127	0.222134	8.53137	2.69112	0.016144	0.636497	1
ENSG00000167619	TMEM145	TM145_HUMAN	Q8NBT3	A_23_P67127	0.222134	8.53137	2.69112	0.016144	0.636497	1
ENSG00000103275	UBE2I	UBC9_HUMAN	P63279	A_24_P227993	0.224421	11.4376	2.68889	0.0162176	0.636497	1
ENSG00000230216	-	-	-	A_24_P178167	-0.219031	12.3262	-2.68843	0.016233	0.636497	1
ENSG00000128335	APOL2	APOL2_HUMAN	Q9BQE5	A_24_P48898	0.293766	8.89144	2.68837	0.0162347	0.636497	1
ENSG00000128829	EIF2AK4	E2AK4_HUMAN	Q9P2K8	A_23_P54540	0.281148	11.1423	2.6881	0.0162439	0.636497	1
ENSG00000185624	P4HB	PDIA1_HUMAN	P07237	A_23_P107412	-0.183099	14.6702	-2.68778	0.0162546	0.636497	1
ENSG00000117713	ARID1A	ARI1A_HUMAN	O14497	A_24_P92952	-0.219745	10.3485	-2.68724	0.0162725	0.636497	1
ENSG00000280169	-	-	-	A_32_P8971	-0.188155	8.90475	-2.68717	0.0162746	0.636497	1
ENSG00000185245	GP1BA	GP1BA_HUMAN	P07359	A_24_P270829	0.27099	7.09957	2.68703	0.0162791	0.636497	1
ENSG00000132541	HRSP12	UK114_HUMAN	P52758	A_23_P134714	0.180517	10.497	2.68604	0.0163122	0.636504	1
ENSG00000279393	-	-	-	A_32_P35433	0.326117	8.9498	2.68585	0.0163185	0.636504	1
ENSG00000087088	BAX	BAX_HUMAN	Q07812	A_23_P346311	0.221462	11.0179	2.68563	0.0163258	0.636504	1
ENSG00000018280	SLC11A1	NRAM1_HUMAN	P49279	A_24_P88690	-0.223888	7.08777	-2.68465	0.0163585	0.637175	1
ENSG00000124222	STX16	STX16_HUMAN	O14662	A_24_P936122	0.224872	10.9245	2.6841	0.0163768	0.637282	1
ENSG00000165556	CDX2	CDX2_HUMAN	Q99626	A_23_P76654	-0.238005	7.03068	-2.68343	0.0163993	0.637555	1
ENSG00000204681	GABBR1	GABR1_HUMAN	Q9UBS5	A_23_P93302	0.237933	8.95517	2.68244	0.0164326	0.63769	1
ENSG00000064393	HIPK2	HIPK2_HUMAN	Q9H2X6	A_23_P169766	-0.218058	11.1584	-2.6824	0.0164338	0.63769	1
ENSG00000245080	-	-	-	A_32_P192881	-0.271766	7.04928	-2.68076	0.0164889	0.638623	1
ENSG00000127074	RGS13	RGS13_HUMAN	O14921	A_23_P500093	-0.234988	6.90869	-2.67963	0.0165269	0.639376	1
ENSG00000163110	PDLIM5	PDLI5_HUMAN	Q96HC4	A_23_P170761	-0.185764	10.8794	-2.67867	0.0165592	0.639376	1
ENSG00000279500	-	-	-	A_23_P105368	0.182501	7.27999	2.67782	0.0165881	0.639376	1
ENSG00000169105	CHST14	CHSTE_HUMAN	Q8NCH0	A_24_P210637	-0.206209	8.65468	-2.6764	0.0166361	0.639376	1
ENSG00000080546	SESN1	SESN1_HUMAN	Q9Y6P5	A_23_P93562	0.229682	9.24409	2.67639	0.0166364	0.639376	1
ENSG00000271015	-	-	-	A_24_P203886	0.227193	7.226	2.67576	0.0166579	0.639376	1
ENSG00000270450	-	-	-	A_24_P203886	0.227193	7.226	2.67576	0.0166579	0.639376	1
ENSG00000215386	-	-	-	A_32_P186865	0.202575	7.17764	2.67558	0.0166639	0.639376	1
ENSG00000162267	ITIH3	ITIH3_HUMAN	Q06033	A_23_P6822	0.264415	7.09115	2.67197	0.0167873	0.642415	1
ENSG00000138131	LOXL4	LOXL4_HUMAN	Q96JB6	A_23_P12755	-0.279031	7.33963	-2.67143	0.0168057	0.642415	1
ENSG00000075539	FRYL	FRYL_HUMAN	O94915	A_24_P68229	-0.204796	9.6137	-2.66988	0.0168589	0.642948	1
ENSG00000115762	PLEKHB2	PKHB2_HUMAN	Q96CS7	A_23_P28638	-0.204593	11.3196	-2.66928	0.0168793	0.642948	1
ENSG00000182195	LDOC1	LDOC1_HUMAN	O95751	A_23_P114105	-0.226806	9.21167	-2.66808	0.0169207	0.642948	1
ENSG00000250682	-	-	-	A_32_P162880	0.200812	7.56305	2.66772	0.0169333	0.642948	1
ENSG00000177570	SAMD12	SAM12_HUMAN	Q8N8I0	A_32_P92355	-0.24484	7.27633	-2.66742	0.0169437	0.642948	1
ENSG00000172183	ISG20	ISG20_HUMAN	Q96AZ6	A_23_P32404	0.218514	10.1353	2.66721	0.0169507	0.642948	1
ENSG00000260669	-	-	-	A_23_P106226	0.184629	12.5709	2.66696	0.0169593	0.642948	1
ENSG00000254505	CHMP4A	CHM4A_HUMAN	Q9BY43	A_23_P106226	0.184629	12.5709	2.66696	0.0169593	0.642948	1
ENSG00000153029	MR1	HMR1_HUMAN	Q95460	A_23_P201837	0.172395	7.1654	2.66693	0.0169604	0.642948	1
ENSG00000143549	TPM3	TPM3_HUMAN	P06753	A_23_P310222	-0.172116	13.4433	-2.66404	0.0170606	0.64584	1
ENSG00000101134	DOK5	DOK5_HUMAN	Q9P104	A_23_P40217	0.168687	8.19437	2.66307	0.0170944	0.64584	1
ENSG00000147082	CCNB3	CCNB3_HUMAN	Q8WWL7	A_23_P171107	-0.225976	7.17996	-2.66114	0.0171618	0.646644	1
ENSG00000229636	-	-	-	A_24_P93321	-0.308671	8.84208	-2.66102	0.0171657	0.646644	1
ENSG00000186231	KIAA1900	KLH32_HUMAN	Q96NJ5	A_23_P425766	-0.238848	7.01552	-2.6609	0.0171699	0.646644	1
ENSG00000186231	KLHL32	KLH32_HUMAN	Q96NJ5	A_23_P425766	-0.238848	7.01552	-2.6609	0.0171699	0.646644	1
ENSG00000219481	NBPF1	-	-	A_24_P566932	-0.190605	7.59916	-2.6601	0.0171982	0.646644	1
ENSG00000197872	FAM49A	FA49A_HUMAN	Q9H0Q0	A_23_P21560	0.233358	7.9173	2.65795	0.0172734	0.647434	1
ENSG00000165804	ZNF219	ZN219_HUMAN	Q9P2Y4	A_23_P431360	0.195048	13.7309	2.65794	0.017274	0.647434	1
ENSG00000184785	SMIM10	SIM10_HUMAN	Q96HG1	A_24_P67534	0.220638	7.27971	2.65792	0.0172746	0.647434	1
ENSG00000255152	MSH5-SAPCD1	-	-	A_24_P3804	0.339312	9.11114	2.65743	0.0172916	0.647434	1
ENSG00000228727	SAPCD1	SAPC1_HUMAN	Q5SSQ6	A_24_P3804	0.339312	9.11114	2.65743	0.0172916	0.647434	1
ENSG00000048052	HDAC9	HDAC9_HUMAN	Q9UKV0	A_23_P332459	0.219044	7.07729	2.6566	0.0173211	0.647434	1
ENSG00000153363	-	-	-	A_23_P1014	-0.301346	12.2716	-2.65577	0.0173502	0.647434	1
ENSG00000204711	C9orf135	CI135_HUMAN	Q5VTT2	A_32_P85732	0.193491	10.6446	2.65539	0.0173638	0.647434	1
ENSG00000215154	-	-	-	A_23_P305616	-0.253549	7.31496	-2.65399	0.0174133	0.647434	1
ENSG00000126709	IFI6	IFI6_HUMAN	P09912	A_23_P201459	0.17026	7.62759	2.65288	0.0174529	0.647434	1
ENSG00000128833	MYO5C	MYO5C_HUMAN	Q9NQX4	A_23_P140434	0.222138	9.39612	2.65258	0.0174635	0.647434	1
ENSG00000164692	COL1A2	CO1A2_HUMAN	P08123	A_24_P277934	0.225674	9.62559	2.65236	0.0174713	0.647434	1
ENSG00000156304	SCAF4	SFR15_HUMAN	O95104	A_23_P6223	-0.240746	9.23828	-2.65135	0.0175071	0.647434	1
ENSG00000163995	ABLIM2	ABLM2_HUMAN	Q6H8Q1	A_23_P255672	0.222504	7.39507	2.65102	0.017519	0.647434	1
ENSG00000076258	FMO4	FMO4_HUMAN	P31512	A_24_P28562	0.204092	7.23982	2.65071	0.01753	0.647434	1
ENSG00000119508	NR4A3	NR4A3_HUMAN	Q92570	A_23_P398566	-0.232844	9.15816	-2.64989	0.0175593	0.647434	1
ENSG00000112053	SLC26A8	S26A8_HUMAN	Q96RN1	A_23_P30950	0.205812	6.97751	2.6495	0.0175733	0.647434	1
ENSG00000157657	ZNF618	ZN618_HUMAN	Q5T7W0	A_23_P43679	-0.220399	11.2474	-2.64916	0.0175852	0.647434	1
ENSG00000161533	ACOX1	ACOX1_HUMAN	Q15067	A_24_P935889	-0.171122	7.76252	-2.6487	0.0176016	0.647434	1
ENSG00000149742	SLC22A9	S22A9_HUMAN	Q8IVM8	A_23_P150590	-0.175158	7.0583	-2.6484	0.0176126	0.647434	1
ENSG00000177565	TBL1XR1	TBL1R_HUMAN	Q9BZK7	A_24_P114604	-0.291316	11.2733	-2.64806	0.0176248	0.647434	1
ENSG00000163092	XIRP2	XIRP2_HUMAN	A4UGR9	A_23_P108743	-0.16915	7.04514	-2.64723	0.0176546	0.647434	1
ENSG00000172073	TEX37	TEX37_HUMAN	Q96LM6	A_23_P432005	0.248752	7.2682	2.64706	0.0176605	0.647434	1
ENSG00000162522	KIAA1522	K1522_HUMAN	Q9P206	A_23_P410965	0.17917	12.2593	2.64532	0.0177234	0.64839	1
ENSG00000260231	-	-	-	A_32_P54503	-0.257529	7.70867	-2.64499	0.0177351	0.64839	1
ENSG00000224520	-	-	-	A_24_P67395	-0.418445	9.70735	-2.64342	0.0177918	0.649313	1
ENSG00000170421	KRT8	K2C8_HUMAN	P05787	A_24_P67395	-0.418445	9.70735	-2.64342	0.0177918	0.649313	1
ENSG00000162493	PDPN	PDPN_HUMAN	Q86YL7	A_23_P430068	0.234977	10.707	2.64272	0.0178171	0.649313	1
ENSG00000176912	TYMSOS	TYMOS_HUMAN	Q8TAI1	A_24_P238499	0.254475	8.69389	2.64254	0.0178236	0.649313	1
ENSG00000178104	PDE4DIP	MYOME_HUMAN	Q5VU43	A_24_P253100	-0.251942	8.87107	-2.64149	0.0178619	0.649804	1
ENSG00000128573	FOXP2	FOXP2_HUMAN	O15409	A_24_P16559	-0.234094	7.1525	-2.6413	0.0178687	0.649804	1
ENSG00000256915	-	-	-	A_24_P461881	-0.203077	6.9685	-2.64022	0.0179079	0.649881	1
ENSG00000249748	-	-	-	A_32_P59086	0.208571	6.99926	2.63956	0.017932	0.649881	1
ENSG00000275896	PRSS3P2	-	-	A_32_P94444	-0.339034	12.6507	-2.63951	0.0179337	0.649881	1
ENSG00000183479	TREX2	TREX2_HUMAN	Q9BQ50	A_23_P416036	0.266763	9.89544	2.63932	0.0179409	0.649881	1
ENSG00000213397	HAUS7	HAUS7_HUMAN	Q99871	A_23_P416036	0.266763	9.89544	2.63932	0.0179409	0.649881	1
ENSG00000229847	-	-	-	A_24_P892472	0.247762	7.00194	2.63704	0.018024	0.649881	1
ENSG00000255515	-	-	-	A_24_P84401	0.233582	7.50027	2.63676	0.0180343	0.649881	1
ENSG00000071054	MAP4K4	-	-	A_24_P157165	-0.170599	8.63796	-2.63671	0.0180363	0.649881	1
ENSG00000163739	CXCL1	GROA_HUMAN	P09341	A_23_P7144	0.379485	8.6078	2.63658	0.0180412	0.649881	1
ENSG00000163082	SGPP2	SGPP2_HUMAN	Q8IWX5	A_23_P153971	0.210473	7.00502	2.63649	0.0180443	0.649881	1
ENSG00000137198	GMPR	GMPR1_HUMAN	P36959	A_24_P277657	-0.333701	9.61438	-2.63493	0.0181017	0.649881	1
ENSG00000176563	CNTD	CNTD1_HUMAN	Q8N815	A_23_P55198	0.226458	7.014	2.63411	0.0181317	0.649881	1
ENSG00000176563	CNTD1	CNTD1_HUMAN	Q8N815	A_23_P55198	0.226458	7.014	2.63411	0.0181317	0.649881	1
ENSG00000134830	C5AR2	C5AR2_HUMAN	Q9P296	A_23_P164943	0.159496	7.54754	2.63383	0.0181421	0.649881	1
ENSG00000124177	CHD6	CHD6_HUMAN	Q8TD26	A_23_P91217	-0.213034	7.94996	-2.63279	0.0181804	0.649881	1
ENSG00000073803	MAP3K13	M3K13_HUMAN	O43283	A_23_P58031	-0.178369	7.36662	-2.63252	0.0181904	0.649881	1
ENSG00000159216	RUNX1	RUNX1_HUMAN	Q01196	A_24_P96403	-0.18363	7.41168	-2.6319	0.0182132	0.649881	1
ENSG00000178177	LCORL	LCORL_HUMAN	Q8N3X6	A_23_P375541	0.215195	6.95294	2.63106	0.0182446	0.649881	1
ENSG00000274338	CATSPERB	CTSRB_HUMAN	Q9H7T0	A_23_P77043	0.249331	7.0193	2.63074	0.0182565	0.649881	1
ENSG00000133962	CATSPERB	CTSRB_HUMAN	Q9H7T0	A_23_P77043	0.249331	7.0193	2.63074	0.0182565	0.649881	1
ENSG00000138646	HERC5	HERC5_HUMAN	Q9UII4	A_23_P110196	0.221601	9.55022	2.63031	0.0182723	0.649881	1
ENSG00000012232	EXTL3	EXTL3_HUMAN	O43909	A_23_P384405	0.205645	12.3124	2.63029	0.0182732	0.649881	1
ENSG00000088808	PPP1R13B	ASPP1_HUMAN	Q96KQ4	A_23_P205273	-0.235598	8.60879	-2.63025	0.0182747	0.649881	1
ENSG00000103942	HOMER2	HOME2_HUMAN	Q9NSB8	A_23_P99906	-0.18633	10.2618	-2.63009	0.0182805	0.649881	1
ENSG00000183386	FHL3	FHL3_HUMAN	Q13643	A_23_P114839	-0.256351	9.81833	-2.63005	0.018282	0.649881	1
ENSG00000142002	DPP9	DPP9_HUMAN	Q86TI2	A_24_P288323	-0.201141	7.44518	-2.62835	0.0183451	0.649907	1
ENSG00000196867	ZFP28	ZFP28_HUMAN	Q8NHY6	A_24_P151106	0.221791	7.04365	2.62713	0.0183908	0.649907	1
ENSG00000116990	MYCL	MYCL_HUMAN	P12524	A_23_P160668	-0.223809	7.19248	-2.62671	0.0184064	0.649907	1
ENSG00000156687	UNC5D	UNC5D_HUMAN	Q6UXZ4	A_23_P216118	0.228594	9.37311	2.62532	0.0184586	0.649907	1
ENSG00000088053	GP6	GPVI_HUMAN	Q9HCN6	A_23_P27784	0.222636	7.22716	2.62494	0.0184727	0.649907	1
ENSG00000248555	-	-	-	A_24_P669271	-0.216716	7.02194	-2.62428	0.0184977	0.649907	1
ENSG00000105321	CCDC9	CCDC9_HUMAN	Q9Y3X0	A_23_P417965	-0.192192	9.83948	-2.62387	0.0185129	0.649907	1
ENSG00000204356	NELFE	NELFE_HUMAN	P18615	A_23_P122545	0.187282	13.6802	2.62379	0.0185159	0.649907	1
ENSG00000170807	LMOD2	LMOD2_HUMAN	Q6P5Q4	A_24_P249253	0.222006	7.14128	2.62292	0.0185485	0.649907	1
ENSG00000124721	DNAH8	DYH8_HUMAN	Q96JB1	A_24_P308051	0.198643	7.01863	2.62243	0.0185672	0.649907	1
ENSG00000131459	GFPT2	GFPT2_HUMAN	O94808	A_23_P144916	0.337306	12.1417	2.62169	0.0185952	0.649907	1
ENSG00000079308	TNS1	TENS1_HUMAN	Q9HBL0	A_24_P105733	0.244799	7.03543	2.62138	0.0186067	0.649907	1
ENSG00000131910	NR0B2	NR0B2_HUMAN	Q15466	A_23_P160800	0.297585	7.14551	2.6212	0.0186133	0.649907	1
ENSG00000100985	MMP9	MMP9_HUMAN	P14780	A_23_P40174	-0.271498	9.12529	-2.62104	0.0186197	0.649907	1
ENSG00000135297	MTO1	MTO1_HUMAN	Q9Y2Z2	A_23_P145068	0.18923	10.1123	2.62087	0.0186261	0.649907	1
ENSG00000141401	IMPA2	IMPA2_HUMAN	O14732	A_23_P50081	0.218465	13.5406	2.62025	0.0186494	0.649907	1
ENSG00000135749	PCNXL2	PCX2_HUMAN	A6NKB5	A_23_P200260	0.218396	10.0527	2.61993	0.0186615	0.649907	1
ENSG00000233503	-	-	-	A_24_P340771	-0.166611	8.64139	-2.61937	0.0186828	0.649907	1
ENSG00000275746	KLF13	KLF13_HUMAN	Q9Y2Y9	A_23_P413150	-0.234265	8.18301	-2.61899	0.0186972	0.649907	1
ENSG00000169926	KLF13	KLF13_HUMAN	Q9Y2Y9	A_23_P413150	-0.234265	8.18301	-2.61899	0.0186972	0.649907	1
ENSG00000141934	PPAP2C	LPP2_HUMAN	O43688	A_23_P108294	0.325714	10.461	2.61897	0.018698	0.649907	1
ENSG00000245685	-	-	-	A_32_P13533	0.193976	7.05531	2.6186	0.018712	0.649907	1
ENSG00000231322	-	-	-	A_24_P161197	0.194464	7.01582	2.61824	0.0187256	0.649907	1
ENSG00000211898	IGHD	-	-	A_24_P135384	-0.187612	7.57923	-2.61671	0.0187838	0.649909	1
ENSG00000132623	ANKEF1	ANKE1_HUMAN	Q9NU02	A_23_P256047	-0.187416	8.13058	-2.61629	0.0187998	0.649909	1
ENSG00000023445	BIRC3	BIRC3_HUMAN	Q13489	A_23_P98350	-0.204829	7.0234	-2.61572	0.0188218	0.649909	1
ENSG00000139190	VAMP1	VAMP1_HUMAN	P23763	A_23_P105545	0.183993	7.27318	2.61524	0.0188399	0.649909	1
ENSG00000178796	RIIAD1	RIAD1_HUMAN	A6NNX1	A_32_P212471	0.211862	7.86924	2.61504	0.0188476	0.649909	1
ENSG00000157021	-	-	-	A_32_P176675	0.212058	9.21444	2.61456	0.0188661	0.649909	1
ENSG00000164674	SYTL3	SYTL3_HUMAN	Q4VX76	A_24_P291826	-0.214758	7.15597	-2.61333	0.018913	0.650074	1
ENSG00000081237	PTPRC	PTPRC_HUMAN	P08575	A_23_P12392	0.350154	7.10473	2.61303	0.0189248	0.650074	1
ENSG00000104154	SLC30A4	ZNT4_HUMAN	O14863	A_32_P21255	-0.21895	7.69664	-2.61167	0.0189771	0.650074	1
ENSG00000183317	EPHA10	EPHAA_HUMAN	Q5JZY3	A_23_P385199	-0.24406	7.04534	-2.6115	0.0189835	0.650074	1
ENSG00000125753	VASP	VASP_HUMAN	P50552	A_23_P119102	-0.244111	12.0532	-2.61103	0.0190016	0.650074	1
ENSG00000086548	CEACAM6	CEAM6_HUMAN	P40199	A_23_P218442	-0.827252	6.60359	-2.60997	0.0190424	0.650074	1
ENSG00000230989	HSBP1	HSBP1_HUMAN	O75506	A_23_P100203	0.173648	11.6852	2.60987	0.0190463	0.650074	1
ENSG00000132631	SCP2D1	SCP2D_HUMAN	Q9UJQ7	A_23_P28920	0.25121	7.08219	2.60987	0.0190463	0.650074	1
ENSG00000134253	TRIM45	TRI45_HUMAN	Q9H8W5	A_23_P160518	0.200722	9.21697	2.60956	0.0190583	0.650074	1
ENSG00000152527	PLEKHH2	PKHH2_HUMAN	Q8IVE3	A_23_P384748	0.165876	7.18896	2.60945	0.0190626	0.650074	1
ENSG00000029559	IBSP	SIAL_HUMAN	P21815	A_23_P144549	-0.248468	7.07339	-2.60625	0.0191865	0.651844	1
ENSG00000151849	CENPJ	CENPJ_HUMAN	Q9HC77	A_32_P219116	0.205943	11.0897	2.6057	0.0192081	0.651844	1
ENSG00000132424	PNISR	PNISR_HUMAN	Q8TF01	A_24_P940725	0.318112	8.81391	2.60446	0.0192563	0.651844	1
ENSG00000010282	HHATL	HHATL_HUMAN	Q9HCP6	A_23_P255298	0.223605	7.04736	2.60422	0.0192656	0.651844	1
ENSG00000104853	CLPTM1	CLPT1_HUMAN	O96005	A_23_P50241	-0.251969	10.3181	-2.60396	0.0192761	0.651844	1
ENSG00000133574	GIMAP4	GIMA4_HUMAN	Q9NUV9	A_24_P209455	0.252639	7.08607	2.6034	0.0192979	0.651844	1
ENSG00000174780	SRP72	SRP72_HUMAN	O76094	A_23_P337201	-0.196002	12.6138	-2.60234	0.0193395	0.651844	1
ENSG00000108001	EBF3	COE3_HUMAN	Q9H4W6	A_23_P391396	-0.270014	8.45002	-2.60232	0.0193403	0.651844	1
ENSG00000164934	DCAF13	DCA13_HUMAN	Q9NV06	A_24_P995	0.204197	7.24339	2.60225	0.0193428	0.651844	1
ENSG00000134769	DTNA	DTNA_HUMAN	Q9Y4J8	A_23_P208158	0.237308	9.64766	2.60167	0.0193656	0.651844	1
ENSG00000266485	-	-	-	A_24_P256063	-0.248898	14.2802	-2.60162	0.0193676	0.651844	1
ENSG00000215807	-	-	-	A_24_P256063	-0.248898	14.2802	-2.60162	0.0193676	0.651844	1
ENSG00000183199	-	-	-	A_32_P147505	-0.201031	12.453	-2.60138	0.0193768	0.651844	1
ENSG00000062282	DGAT2	DGAT2_HUMAN	Q96PD7	A_23_P53198	-0.2555	8.32855	-2.60124	0.0193823	0.651844	1
ENSG00000117597	DIEXF	DIEXF_HUMAN	Q68CQ4	A_23_P34946	0.227074	7.18236	2.60079	0.0194	0.651844	1
ENSG00000211938	-	-	-	A_32_P51988	-0.276713	6.8711	-2.59531	0.0196168	0.657121	1
ENSG00000211896	IGHG1	IGHG1_HUMAN	P01857	A_32_P51988	-0.276713	6.8711	-2.59531	0.0196168	0.657121	1
ENSG00000254056	-	-	-	A_32_P51988	-0.276713	6.8711	-2.59531	0.0196168	0.657121	1
ENSG00000211967	IGHV3-53	-	-	A_32_P51988	-0.276713	6.8711	-2.59531	0.0196168	0.657121	1
ENSG00000125945	ZNF436	ZN436_HUMAN	Q9C0F3	A_23_P51202	-0.199725	8.78317	-2.59524	0.0196195	0.657121	1
ENSG00000166159	LRTM2	LRTM2_HUMAN	Q8N967	A_23_P318616	-0.23421	7.11373	-2.5952	0.0196211	0.657121	1
ENSG00000198284	-	-	-	A_32_P375062	0.19566	6.90165	2.59438	0.0196535	0.657673	1
ENSG00000033800	PIAS1	PIAS1_HUMAN	O75925	A_23_P163353	-0.171688	8.8081	-2.59397	0.0196702	0.65769	1
ENSG00000110801	PSMD9	PSMD9_HUMAN	O00233	A_24_P116017	-0.183535	7.7552	-2.59357	0.019686	0.65769	1
ENSG00000158023	WDR66	WDR66_HUMAN	Q8TBY9	A_24_P116017	-0.183535	7.7552	-2.59357	0.019686	0.65769	1
ENSG00000011422	PLAUR	UPAR_HUMAN	Q03405	A_23_P16469	-0.210831	10.9271	-2.59243	0.0197316	0.658677	1
ENSG00000143006	DMRTB1	DMRTB_HUMAN	Q96MA1	A_32_P59158	-0.220481	7.06317	-2.59055	0.0198068	0.659018	1
ENSG00000256008	-	-	-	A_24_P715434	0.205179	7.42807	2.59027	0.019818	0.659018	1
ENSG00000269502	DMRTC1	DMRTC_HUMAN	Q5HYR2	A_32_P179998	-0.205552	7.08772	-2.59021	0.0198202	0.659018	1
ENSG00000269502	DMRTC1B	DMRTC_HUMAN	Q5HYR2	A_32_P179998	-0.205552	7.08772	-2.59021	0.0198202	0.659018	1
ENSG00000184911	DMRTC1	DMRTC_HUMAN	Q5HYR2	A_32_P179998	-0.205552	7.08772	-2.59021	0.0198202	0.659018	1
ENSG00000184911	DMRTC1B	DMRTC_HUMAN	Q5HYR2	A_32_P179998	-0.205552	7.08772	-2.59021	0.0198202	0.659018	1
ENSG00000143416	SELENBP1	SBP1_HUMAN	Q13228	A_23_P74619	0.22378	7.86214	2.59009	0.0198252	0.659018	1
ENSG00000167531	LALBA	LALBA_HUMAN	P00709	A_23_P116765	0.278526	6.93559	2.59004	0.0198273	0.659018	1
ENSG00000100504	PYGL	PYGL_HUMAN	P06737	A_23_P48676	0.194557	10.9482	2.58867	0.0198824	0.659275	1
ENSG00000186994	KANK3	KANK3_HUMAN	Q6NY19	A_23_P131089	0.231473	8.58593	2.58797	0.0199106	0.659275	1
ENSG00000155093	PTPRN2	PTPR2_HUMAN	Q92932	A_32_P79434	0.250161	7.16267	2.58736	0.0199351	0.659275	1
ENSG00000168566	SNRNP48	SNR48_HUMAN	Q6IEG0	A_23_P306234	-0.200397	10.9713	-2.58711	0.0199451	0.659275	1
ENSG00000188312	CENPP	CENPP_HUMAN	Q6IPU0	A_32_P119174	0.174836	9.28118	2.58691	0.0199531	0.659275	1
ENSG00000232973	-	-	-	A_32_P361884	0.242413	7.122	2.58617	0.0199832	0.659275	1
ENSG00000172270	BSG	BASI_HUMAN	P35613	A_24_P202769	-0.172673	13.4296	-2.58532	0.0200175	0.659275	1
ENSG00000165512	ZNF22	ZNF22_HUMAN	P17026	A_23_P384512	-0.17645	7.54543	-2.58351	0.0200911	0.659275	1
ENSG00000260934	-	-	-	A_24_P861622	0.216829	6.97947	2.58278	0.0201206	0.659275	1
ENSG00000129595	EPB41L4A	E41LA_HUMAN	Q9HCS5	A_24_P944378	-0.230379	6.88259	-2.58275	0.0201217	0.659275	1
ENSG00000167767	KRT80	K2C80_HUMAN	Q6KB66	A_24_P331704	-0.19048	7.12554	-2.58266	0.0201256	0.659275	1
ENSG00000266714	-	-	-	A_24_P369898	0.19268	7.80167	2.58198	0.0201532	0.659275	1
ENSG00000013588	GPRC5A	RAI3_HUMAN	Q8NFJ5	A_23_P36831	0.229743	6.88148	2.58179	0.020161	0.659275	1
ENSG00000151655	ITIH2	ITIH2_HUMAN	P19823	A_23_P202053	0.217746	6.94616	2.58147	0.0201739	0.659275	1
ENSG00000266817	-	-	-	A_24_P247454	-0.24428	13.7249	-2.58128	0.0201818	0.659275	1
ENSG00000213601	-	-	-	A_24_P247454	-0.24428	13.7249	-2.58128	0.0201818	0.659275	1
ENSG00000183654	40603	MARHB_HUMAN	A6NNE9	A_24_P33508	-0.225525	10.1683	-2.58121	0.0201847	0.659275	1
ENSG00000184357	HIST1H1B	H15_HUMAN	P16401	A_23_P250385	-0.342387	11.4394	-2.58021	0.0202256	0.659275	1
ENSG00000143278	F13B	F13B_HUMAN	P05160	A_23_P46549	-0.273123	6.94381	-2.58006	0.0202316	0.659275	1
ENSG00000260776	-	-	-	A_24_P392030	0.23652	7.08528	2.57956	0.0202519	0.659275	1
ENSG00000186481	-	-	-	A_32_P68293	-0.241391	6.96739	-2.57899	0.0202756	0.659275	1
ENSG00000147065	MSN	MOES_HUMAN	P26038	A_23_P73593	-0.222657	11.4539	-2.57823	0.0203065	0.659275	1
ENSG00000213463	SYNJ2BP	SYJ2B_HUMAN	P57105	A_23_P65357	-0.174172	10.7365	-2.57794	0.0203184	0.659275	1
ENSG00000164199	GPR98	GPR98_HUMAN	Q8WXG9	A_24_P419058	-0.215215	6.94318	-2.57754	0.0203352	0.659275	1
ENSG00000181656	GPR88	GPR88_HUMAN	Q9GZN0	A_23_P149749	-0.241394	7.02705	-2.57748	0.0203375	0.659275	1
ENSG00000149295	DRD2	DRD2_HUMAN	P14416	A_24_P283834	0.288243	7.63054	2.57727	0.0203463	0.659275	1
ENSG00000140497	SCAMP2	SCAM2_HUMAN	O15127	A_23_P385081	-0.1849	9.20239	-2.57717	0.0203501	0.659275	1
ENSG00000237057	-	-	-	A_32_P169003	0.218859	6.8979	2.57674	0.0203681	0.659275	1
ENSG00000226096	-	-	-	A_32_P169003	0.218859	6.8979	2.57674	0.0203681	0.659275	1
ENSG00000231203	-	-	-	A_24_P357836	-0.331137	8.88841	-2.57623	0.020389	0.659275	1
ENSG00000196932	TMEM26	TMM26_HUMAN	Q6ZUK4	A_32_P75264	0.244454	6.9788	2.57442	0.0204635	0.659275	1
ENSG00000226889	-	-	-	A_24_P922387	-0.217954	7.02054	-2.57346	0.0205037	0.659275	1
ENSG00000197647	ZNF433	ZN433_HUMAN	Q8N7K0	A_23_P27649	0.176992	8.40025	2.57329	0.0205104	0.659275	1
ENSG00000267629	-	-	-	A_23_P430842	-0.178028	7.49956	-2.57314	0.0205168	0.659275	1
ENSG00000187664	-	-	-	A_23_P430842	-0.178028	7.49956	-2.57314	0.0205168	0.659275	1
ENSG00000005889	ZFX	ZFX_HUMAN	P17010	A_23_P125639	-0.181344	7.68967	-2.5728	0.0205309	0.659275	1
ENSG00000011523	CEP68	CEP68_HUMAN	Q76N32	A_32_P164061	0.179147	7.60769	2.5725	0.0205431	0.659275	1
ENSG00000011523	DKFZp686H16130	CEP68_HUMAN	Q76N32	A_32_P164061	0.179147	7.60769	2.5725	0.0205431	0.659275	1
ENSG00000232615	-	-	-	A_24_P400729	-0.184631	10.4883	-2.57239	0.0205479	0.659275	1
ENSG00000250848	-	-	-	A_24_P400729	-0.184631	10.4883	-2.57239	0.0205479	0.659275	1
ENSG00000141858	SAMD1	-	-	A_23_P435941	-0.204298	9.57076	-2.57106	0.0206032	0.659896	1
ENSG00000125841	NRSN2	NRSN2_HUMAN	Q9GZP1	A_23_P143274	-0.183259	8.5319	-2.57053	0.0206253	0.660088	1
ENSG00000088256	GNA11	GNA11_HUMAN	P29992	A_23_P142289	-0.193701	9.31058	-2.57011	0.0206427	0.660133	1
ENSG00000123609	NMI	NMI_HUMAN	Q13287	A_23_P154235	0.173648	7.53187	2.56953	0.020667	0.660397	1
ENSG00000151092	NGLY1	NGLY1_HUMAN	Q96IV0	A_23_P218841	0.173227	11.9873	2.56705	0.0207709	0.662261	1
ENSG00000206073	SERPINB4	SPB4_HUMAN	P48594	A_23_P502413	0.396596	7.77011	2.56689	0.0207773	0.662261	1
ENSG00000057149	SERPINB3	SPB3_HUMAN	P29508	A_23_P502413	0.396596	7.77011	2.56689	0.0207773	0.662261	1
ENSG00000140848	CPNE2	CPNE2_HUMAN	Q96FN4	A_23_P37988	-0.244037	9.68199	-2.5665	0.020794	0.662261	1
ENSG00000162433	AK4	KAD4_HUMAN	P27144	A_24_P345290	-0.187506	10.6208	-2.5664	0.0207981	0.662261	1
ENSG00000177947	ODF3	ODF3A_HUMAN	Q96PU9	A_24_P4736	-0.189747	6.99156	-2.56537	0.0208414	0.662261	1
ENSG00000234665	-	-	-	A_23_P369447	0.180662	7.33143	2.56422	0.0208899	0.662261	1
ENSG00000227449	-	-	-	A_23_P369447	0.180662	7.33143	2.56422	0.0208899	0.662261	1
ENSG00000212951	-	-	-	A_23_P369447	0.180662	7.33143	2.56422	0.0208899	0.662261	1
ENSG00000229273	-	-	-	A_23_P369447	0.180662	7.33143	2.56422	0.0208899	0.662261	1
ENSG00000276692	-	-	-	A_23_P369447	0.180662	7.33143	2.56422	0.0208899	0.662261	1
ENSG00000212952	-	-	-	A_23_P369447	0.180662	7.33143	2.56422	0.0208899	0.662261	1
ENSG00000124749	COL21A1	COLA1_HUMAN	Q96P44	A_23_P31124	0.178205	7.31191	2.56404	0.0208975	0.662261	1
ENSG00000075461	CACNG4	CCG4_HUMAN	Q9UBN1	A_24_P70303	-0.178564	7.44116	-2.56398	0.0208998	0.662261	1
ENSG00000156413	FUT6	FUT6_HUMAN	P51993	A_23_P5092	-0.20838	7.05065	-2.56236	0.0209683	0.662261	1
ENSG00000168785	TSPAN5	TSN5_HUMAN	P62079	A_23_P61886	0.194601	10.8238	2.56186	0.0209895	0.662261	1
ENSG00000240583	AQP1	AQP1_HUMAN	P29972	A_23_P372834	-0.220456	7.19964	-2.56107	0.021023	0.662261	1
ENSG00000231875	-	-	-	A_24_P483096	-0.232262	7.03019	-2.56076	0.0210362	0.662261	1
ENSG00000107742	SPOCK2	TICN2_HUMAN	Q92563	A_23_P161280	-0.235211	9.19139	-2.56058	0.0210439	0.662261	1
ENSG00000130558	OLFM1	NOE1_HUMAN	Q99784	A_24_P406601	0.207847	8.98101	2.56049	0.0210477	0.662261	1
ENSG00000172482	AGXT	SPYA_HUMAN	P21549	A_23_P83590	0.301108	6.99381	2.55995	0.0210707	0.662477	1
ENSG00000138380	CARF	CARTF_HUMAN	Q8N187	A_24_P911896	0.207724	7.12787	2.55952	0.021089	0.662546	1
ENSG00000187630	DHRS4L2	DR4L2_HUMAN	Q6PKH6	A_23_P162982	-0.18949	10.2487	-2.55759	0.0211716	0.663603	1
ENSG00000157326	DHRS4	DHRS4_HUMAN	Q9BTZ2	A_23_P162982	-0.18949	10.2487	-2.55759	0.0211716	0.663603	1
ENSG00000119943	PYROXD2	PYRD2_HUMAN	Q8N2H3	A_23_P24157	-0.213598	7.61125	-2.55648	0.0212189	0.663603	1
ENSG00000119522	DENND1A	DEN1A_HUMAN	Q8TEH3	A_32_P23854	0.159662	9.82385	2.55624	0.0212293	0.663603	1
ENSG00000109472	CPE	CBPE_HUMAN	P16870	A_23_P259442	-0.219704	13.9541	-2.55569	0.0212525	0.663603	1
ENSG00000001617	SEMA3F	SEM3F_HUMAN	Q13275	A_23_P6878	-0.178802	8.08278	-2.55528	0.0212701	0.663603	1
ENSG00000279610	-	-	-	A_24_P238021	-0.213949	7.28627	-2.55497	0.0212835	0.663603	1
ENSG00000102158	MAGT1	MAGT1_HUMAN	Q9H0U3	A_24_P485219	-0.236776	9.13364	-2.55445	0.0213058	0.663603	1
ENSG00000157653	C9orf43	CI043_HUMAN	Q8TAL5	A_23_P320862	-0.206691	7.14223	-2.55439	0.0213086	0.663603	1
ENSG00000134369	NAV1	NAV1_HUMAN	Q8NEY1	A_24_P212096	-0.202103	8.29445	-2.55334	0.0213537	0.664259	1
ENSG00000143994	ABHD1	ABHD1_HUMAN	Q96SE0	A_23_P17242	0.211762	7.21178	2.55241	0.0213938	0.664418	1
ENSG00000279188	-	-	-	A_24_P42781	-0.263239	6.93082	-2.55207	0.0214086	0.664418	1
ENSG00000107175	CREB3	CREB3_HUMAN	O43889	A_23_P423389	-0.1644	10.215	-2.55172	0.0214235	0.664418	1
ENSG00000248112	-	-	-	A_24_P532864	-0.189101	6.87548	-2.55115	0.0214484	0.66469	1
ENSG00000072195	SPEG	SPEG_HUMAN	Q15772	A_23_P338919	0.256554	11.7532	2.55046	0.0214783	0.665116	1
ENSG00000188559	RALGAPA2	RGPA2_HUMAN	Q2PPJ7	A_23_P143356	0.210261	9.08265	2.548	0.0215849	0.667913	1
ENSG00000117448	AKR1A1	AK1A1_HUMAN	P14550	A_24_P79750	0.201534	13.6566	2.5452	0.0217071	0.668531	1
ENSG00000120616	EPC1	EPC1_HUMAN	Q9H2F5	A_24_P252718	0.180228	9.91847	2.54498	0.021717	0.668531	1
ENSG00000082196	C1QTNF3	C1QT3_HUMAN	Q9BXJ4	A_23_P122067	-0.192101	7.00029	-2.5448	0.0217247	0.668531	1
ENSG00000226645	-	-	-	A_32_P139420	0.194982	6.92686	2.54461	0.021733	0.668531	1
ENSG00000159840	ZYX	ZYX_HUMAN	Q15942	A_23_P254888	-0.208912	12.6702	-2.5444	0.0217421	0.668531	1
ENSG00000163518	FCRL4	FCRL4_HUMAN	Q96PJ5	A_23_P115192	-0.200549	7.11875	-2.54436	0.0217442	0.668531	1
ENSG00000151320	AKAP6	AKAP6_HUMAN	Q13023	A_23_P14351	0.240595	7.11136	2.54334	0.0217889	0.668531	1
ENSG00000090470	PDCD7	PDCD7_HUMAN	Q8N8D1	A_23_P129118	-0.213008	9.77315	-2.54328	0.0217914	0.668531	1
ENSG00000112769	LAMA4	LAMA4_HUMAN	Q16363	A_23_P401176	-0.179418	8.99887	-2.54276	0.021814	0.668531	1
ENSG00000147443	DOK2	DOK2_HUMAN	O60496	A_23_P134851	-0.220561	7.05744	-2.54271	0.0218164	0.668531	1
ENSG00000156959	LHFPL4	LHPL4_HUMAN	Q7Z7J7	A_32_P94	0.258655	10.6829	2.5414	0.021874	0.66932	1
ENSG00000173947	PIFO	PIFO_HUMAN	Q8TCI5	A_32_P215700	0.237668	9.46059	2.54102	0.021891	0.66932	1
ENSG00000145476	CYP4V2	CP4V2_HUMAN	Q6ZWL3	A_24_P945228	-0.219504	7.0017	-2.54033	0.0219212	0.669746	1
ENSG00000154025	SLC5A10	SC5AA_HUMAN	A0PJK1	A_23_P328022	-0.204938	7.24583	-2.53972	0.0219483	0.670075	1
ENSG00000132478	UNK	UNK_HUMAN	Q9C0B0	A_32_P514790	0.185238	10.2662	2.53877	0.0219903	0.670425	1
ENSG00000238243	OR2W3	OR2W3_HUMAN	Q7Z3T1	A_24_P333993	0.239218	6.97144	2.53872	0.0219924	0.670425	1
ENSG00000183853	KIRREL	KIRR1_HUMAN	Q96J84	A_23_P113994	-0.218839	8.04075	-2.53677	0.022079	0.671914	1
ENSG00000211445	GPX3	GPX3_HUMAN	P22352	A_23_P133474	-0.231971	9.92429	-2.53652	0.0220903	0.671914	1
ENSG00000172216	CEBPB	CEBPB_HUMAN	P17676	A_23_P411296	-0.182438	10.887	-2.53562	0.0221305	0.67264	1
ENSG00000040933	INPP4A	INP4A_HUMAN	Q96PE3	A_23_P393531	-0.216592	8.79565	-2.53523	0.0221477	0.672664	1
ENSG00000235106	-	-	-	A_24_P833067	0.267365	7.06079	2.53457	0.0221771	0.673061	1
ENSG00000137648	TMPRSS4	TMPS4_HUMAN	Q9NRS4	A_23_P127608	-0.171616	7.03723	-2.53343	0.022228	0.673267	1
ENSG00000146426	TIAM2	TIAM2_HUMAN	Q8IVF5	A_24_P303454	0.186548	10.5679	2.53328	0.0222349	0.673267	1
ENSG00000166930	MS4A5	MS4A5_HUMAN	Q9H3V2	A_23_P104972	-0.225913	7.09007	-2.53193	0.0222952	0.673267	1
ENSG00000223621	-	-	-	A_23_P136857	-0.240619	8.43684	-2.53116	0.02233	0.673267	1
ENSG00000135114	OASL	OASL_HUMAN	Q15646	A_23_P139786	0.211675	7.08688	2.53083	0.022345	0.673267	1
ENSG00000197217	ENTPD4	ENTP4_HUMAN	Q9Y227	A_23_P216017	-0.17164	9.27207	-2.53054	0.0223578	0.673267	1
ENSG00000105426	PTPRS	PTPRS_HUMAN	Q13332	A_23_P56163	-0.20936	8.47092	-2.53028	0.0223698	0.673267	1
ENSG00000269235	-	-	-	A_24_P367762	0.210019	7.08669	2.53024	0.0223714	0.673267	1
ENSG00000151729	SLC25A4	ADT1_HUMAN	P12235	A_24_P206047	0.19863	11.6703	2.53004	0.0223805	0.673267	1
ENSG00000076944	STXBP2	STXB2_HUMAN	Q15833	A_23_P130619	-0.191126	8.13695	-2.52964	0.0223986	0.673319	1
ENSG00000230712	-	-	-	A_32_P319200	0.22099	9.25928	2.52812	0.0224672	0.673434	1
ENSG00000100121	GGTLC2	GGTL2_HUMAN	Q14390	A_32_P319200	0.22099	9.25928	2.52812	0.0224672	0.673434	1
ENSG00000100031	GGT1	GGT1_HUMAN	P19440	A_32_P319200	0.22099	9.25928	2.52812	0.0224672	0.673434	1
ENSG00000101266	CSNK2A1	CSK21_HUMAN	P68400	A_23_P502575	-0.162078	11.2581	-2.52793	0.0224758	0.673434	1
ENSG00000181350	LRRC75A	LR75A_HUMAN	Q8NAA5	A_23_P368484	0.192647	8.35959	2.52725	0.0225063	0.673434	1
ENSG00000176029	C11orf16	CK016_HUMAN	Q9NQ32	A_23_P13486	0.228911	6.93548	2.52592	0.022567	0.673434	1
ENSG00000123505	AMD1	DCAM_HUMAN	P17707	A_23_P214121	-0.224822	11.2195	-2.52507	0.0226055	0.673434	1
ENSG00000113648	H2AFY	H2AY_HUMAN	O75367	A_23_P70045	-0.222526	13.8034	-2.52468	0.0226231	0.673434	1
ENSG00000108187	PBLD	PBLD_HUMAN	P30039	A_24_P126484	-0.209674	6.93054	-2.52449	0.0226318	0.673434	1
ENSG00000118369	USP35	UBP35_HUMAN	Q9P2H5	A_23_P116602	0.174949	11.1662	2.52321	0.0226901	0.673434	1
ENSG00000008226	DLEC1	DLEC1_HUMAN	Q9Y238	A_23_P18282	0.221953	8.6228	2.52316	0.0226924	0.673434	1
ENSG00000148143	ZNF462	ZN462_HUMAN	Q96JM2	A_23_P60499	0.192985	12.4169	2.52264	0.0227161	0.673434	1
ENSG00000177565	TBL1XR1	TBL1R_HUMAN	Q9BZK7	A_23_P212554	-0.200084	10.5463	-2.52242	0.0227262	0.673434	1
ENSG00000146360	GPR6	GPR6_HUMAN	P46095	A_23_P156919	-0.168476	7.24145	-2.52237	0.0227286	0.673434	1
ENSG00000109572	CLCN3	CLCN3_HUMAN	P51790	A_24_P402847	-0.188505	8.51382	-2.52215	0.0227385	0.673434	1
ENSG00000181222	POLR2A	RPB1_HUMAN	P24928	A_24_P99679	-0.169429	7.90901	-2.52171	0.0227589	0.673434	1
ENSG00000180263	FGD6	FGD6_HUMAN	Q6ZV73	A_32_P104478	-0.191103	10.1684	-2.52162	0.022763	0.673434	1
ENSG00000005981	ASB4	ASB4_HUMAN	Q9Y574	A_32_P130999	-0.212916	7.08526	-2.51978	0.0228474	0.675274	1
ENSG00000156049	GNA14	GNA14_HUMAN	O95837	A_23_P169479	0.403614	9.26941	2.51931	0.0228686	0.675274	1
ENSG00000017483	SLC38A5	S38A5_HUMAN	Q8WUX1	A_23_P84929	-0.29242	11.6524	-2.51919	0.0228745	0.675274	1
ENSG00000093134	VNN3	VNN3_HUMAN	Q9NY84	A_23_P214935	0.164414	6.82077	2.51841	0.0229105	0.675747	1
ENSG00000168234	TTC39C	TT39C_HUMAN	Q8N584	A_23_P401098	0.200475	8.69076	2.51686	0.0229816	0.675747	1
ENSG00000185129	PURA	PURA_HUMAN	Q00577	A_24_P110558	-0.197502	7.71465	-2.51654	0.0229965	0.675747	1
ENSG00000182700	IGIP	IGIP_HUMAN	A6NJ69	A_24_P110558	-0.197502	7.71465	-2.51654	0.0229965	0.675747	1
ENSG00000172215	CXCR6	CXCR6_HUMAN	O00574	A_24_P46066	0.258199	6.93558	2.51625	0.0230101	0.675747	1
ENSG00000174740	PABPC5	PABP5_HUMAN	Q96DU9	A_23_P84047	0.357824	6.94692	2.51604	0.0230199	0.675747	1
ENSG00000067082	KLF6	KLF6_HUMAN	Q99612	A_24_P69654	-0.220489	10.8989	-2.516	0.0230216	0.675747	1
ENSG00000248837	-	-	-	A_32_P147514	0.196083	6.92847	2.51599	0.0230221	0.675747	1
ENSG00000172057	ORMDL3	ORML3_HUMAN	Q8N138	A_23_P38190	-0.163365	7.82985	-2.51444	0.023094	0.675889	1
ENSG00000109846	CRYAB	CRYAB_HUMAN	P02511	A_24_P206776	0.149667	7.39161	2.51393	0.0231175	0.675889	1
ENSG00000133302	ANKRD32	ANR32_HUMAN	Q9BQI6	A_24_P212072	-0.270771	9.91323	-2.51387	0.0231205	0.675889	1
ENSG00000184611	KCNH7	KCNH7_HUMAN	Q9NS40	A_23_P410040	-0.212616	6.9232	-2.51314	0.0231544	0.675889	1
ENSG00000228286	-	-	-	A_24_P109644	0.185241	7.38507	2.51292	0.0231647	0.675889	1
ENSG00000134121	CHL1	NCHL1_HUMAN	O00533	A_23_P212241	-0.216673	7.09075	-2.51291	0.0231651	0.675889	1
ENSG00000244558	-	-	-	A_24_P624263	0.17561	7.18093	2.51277	0.0231715	0.675889	1
ENSG00000276682	-	-	-	A_23_P32064	-0.207375	9.69693	-2.51236	0.0231908	0.675889	1
ENSG00000165802	NSMF	NSMF_HUMAN	Q6X4W1	A_23_P32064	-0.207375	9.69693	-2.51236	0.0231908	0.675889	1
ENSG00000103199	ZNF500	ZN500_HUMAN	O60304	A_32_P486443	0.237974	7.39159	2.51219	0.0231986	0.675889	1
ENSG00000110719	TCIRG1	VPP3_HUMAN	Q13488	A_23_P75369	0.24555	11.841	2.51112	0.0232486	0.676234	1
ENSG00000255031	-	-	-	A_23_P75369	0.24555	11.841	2.51112	0.0232486	0.676234	1
ENSG00000117643	MAN1C1	MA1C1_HUMAN	Q9NR34	A_24_P925342	0.199481	7.09532	2.51068	0.0232691	0.676234	1
ENSG00000185056	C5orf47	CE047_HUMAN	Q569G3	A_32_P178855	0.186419	6.97831	2.50972	0.023314	0.676667	1
ENSG00000163933	RFT1	RFT1_HUMAN	Q96AA3	A_24_P408715	-0.199722	6.99879	-2.50966	0.0233169	0.676667	1
ENSG00000132199	ENOSF1	ENOF1_HUMAN	Q7L5Y1	A_23_P15906	0.195644	10.8132	2.50788	0.0234001	0.677214	1
ENSG00000204403	CASP12	CASPC_HUMAN	Q6UXS9	A_23_P13102	-0.190941	6.90251	-2.50758	0.0234143	0.677214	1
ENSG00000112159	MDN1	MDN1_HUMAN	Q9NU22	A_23_P365060	-0.216276	9.00848	-2.50684	0.0234493	0.677214	1
ENSG00000175274	TP53I11	P5I11_HUMAN	O14683	A_23_P150281	-0.235926	10.9853	-2.50616	0.0234814	0.677214	1
ENSG00000138641	HERC3	HERC3_HUMAN	Q15034	A_23_P121586	0.226495	7.03481	2.50597	0.0234904	0.677214	1
ENSG00000231439	-	-	-	A_24_P289994	0.190929	7.13358	2.50586	0.0234953	0.677214	1
ENSG00000185203	-	-	-	A_24_P289994	0.190929	7.13358	2.50586	0.0234953	0.677214	1
ENSG00000231121	-	-	-	A_32_P140009	-0.224641	6.98744	-2.50457	0.0235562	0.678344	1
ENSG00000268034	-	-	-	A_32_P162338	-0.196187	12.9433	-2.50308	0.0236268	0.678784	1
ENSG00000143549	TPM3	TPM3_HUMAN	P06753	A_32_P162338	-0.196187	12.9433	-2.50308	0.0236268	0.678784	1
ENSG00000118690	ARMC2	ARMC2_HUMAN	Q8NEN0	A_24_P320604	-0.235274	7.03932	-2.50241	0.023659	0.678784	1
ENSG00000073792	IGF2BP2	IF2B2_HUMAN	Q9Y6M1	A_23_P95672	-0.201478	7.61958	-2.50227	0.0236653	0.678784	1
ENSG00000072110	ACTN1	ACTN1_HUMAN	P12814	A_23_P105957	-0.22355	13.1318	-2.50116	0.0237184	0.678784	1
ENSG00000145217	SLC26A1	S26A1_HUMAN	Q9H2B4	A_24_P29117	-0.189325	7.18004	-2.50041	0.023754	0.678784	1
ENSG00000105967	TFEC	TFEC_HUMAN	O14948	A_24_P98210	-0.265946	7.02284	-2.50026	0.0237612	0.678784	1
ENSG00000164270	HTR4	5HT4R_HUMAN	Q13639	A_24_P234768	-0.266084	6.95184	-2.50015	0.0237663	0.678784	1
ENSG00000205181	-	-	-	A_32_P212897	0.206766	6.8869	2.49944	0.0238003	0.678784	1
ENSG00000230563	-	-	-	A_32_P212897	0.206766	6.8869	2.49944	0.0238003	0.678784	1
ENSG00000155085	AK9	KAD9_HUMAN	Q5TCS8	A_32_P36341	0.220214	7.02741	2.49924	0.0238099	0.678784	1
ENSG00000137473	TTC29	TTC29_HUMAN	Q8NA56	A_23_P92517	0.260622	8.13367	2.49884	0.0238291	0.678784	1
ENSG00000051128	HOMER3	HOME3_HUMAN	Q9NSC5	A_23_P39364	0.216798	12.3914	2.49831	0.0238544	0.678784	1
ENSG00000273066	-	-	-	A_24_P278234	0.191278	7.90819	2.49819	0.0238599	0.678784	1
ENSG00000108840	HDAC5	HDAC5_HUMAN	Q9UQL6	A_32_P112359	0.189324	7.21001	2.49819	0.0238603	0.678784	1
ENSG00000130023	ERMARD	EMARD_HUMAN	Q5T6L9	A_32_P129527	0.183893	8.91572	2.49802	0.023868	0.678784	1
ENSG00000170262	MRAP	MRAP_HUMAN	Q8TCY5	A_23_P381172	0.209543	7.01147	2.49687	0.0239232	0.67986	1
ENSG00000172264	MACROD2	MACD2_HUMAN	A1Z1Q3	A_24_P930015	-0.252716	6.93598	-2.49396	0.0240633	0.681395	1
ENSG00000185127	C6orf120	CF120_HUMAN	Q7Z4R8	A_32_P145159	0.162661	8.71858	2.49394	0.0240645	0.681395	1
ENSG00000237205	-	-	-	A_24_P170067	-0.17213	7.07876	-2.49323	0.0240989	0.681395	1
ENSG00000146411	SLC2A12	GTR12_HUMAN	Q8TD20	A_23_P395001	0.1889	7.5819	2.49304	0.0241081	0.681395	1
ENSG00000253219	-	-	-	A_24_P264644	-0.256627	13.5662	-2.49272	0.0241234	0.681395	1
ENSG00000109881	CCDC34	CCD34_HUMAN	Q96HJ3	A_23_P203773	-0.219	7.02141	-2.4923	0.0241435	0.681395	1
ENSG00000176728	-	-	-	A_23_P251232	0.261237	9.05651	2.49169	0.0241734	0.681395	1
ENSG00000183066	WBP2NL	WBP2L_HUMAN	Q6ICG8	A_23_P410128	-0.236235	7.20611	-2.49159	0.0241783	0.681395	1
ENSG00000198870	STKLD1	STKL1_HUMAN	Q8NE28	A_24_P155196	0.197809	7.0988	2.49121	0.0241963	0.681395	1
ENSG00000267120	-	-	-	A_23_P142424	0.176258	11.6827	2.49053	0.0242295	0.681395	1
ENSG00000126246	IGFLR1	IGFR1_HUMAN	Q9H665	A_23_P142424	0.176258	11.6827	2.49053	0.0242295	0.681395	1
ENSG00000234616	JRK	-	-	A_24_P230156	-0.174749	8.3836	-2.48976	0.0242669	0.681395	1
ENSG00000153827	TRIP12	TRIPC_HUMAN	Q14669	A_24_P325691	-0.168962	10.9749	-2.48974	0.0242679	0.681395	1
ENSG00000162069	CCDC64B	BICR2_HUMAN	A1A5D9	A_24_P273647	0.277942	9.64892	2.48964	0.0242727	0.681395	1
ENSG00000111231	GPN3	GPN3_HUMAN	Q9UHW5	A_23_P116999	0.174074	10.8	2.489	0.0243041	0.681395	1
ENSG00000182070	OR52A1	O52A1_HUMAN	Q9UKL2	A_23_P125286	-0.180879	8.21938	-2.48892	0.0243079	0.681395	1
ENSG00000106536	POU6F2	PO6F2_HUMAN	P78424	A_23_P147900	0.191671	7.36049	2.48837	0.0243349	0.681395	1
ENSG00000233527	-	-	-	A_24_P839298	0.160181	7.74081	2.48777	0.0243637	0.681395	1
ENSG00000180332	KCTD4	KCTD4_HUMAN	Q8WVF5	A_23_P48325	-0.242796	6.86279	-2.48773	0.0243657	0.681395	1
ENSG00000163946	FAM208A	F208A_HUMAN	Q9UK61	A_23_P6651	-0.220363	8.00116	-2.48773	0.0243661	0.681395	1
ENSG00000145331	TRMT10A	TM10A_HUMAN	Q8TBZ6	A_23_P398637	0.162548	8.66058	2.48762	0.0243714	0.681395	1
ENSG00000196743	GM2A	SAP3_HUMAN	P17900	A_23_P144872	-0.175604	8.88391	-2.48697	0.0244029	0.681395	1
ENSG00000158480	SPATA2	SPAT2_HUMAN	Q9UM82	A_24_P164838	-0.186286	7.90307	-2.48621	0.0244404	0.681395	1
ENSG00000133398	MED10	MED10_HUMAN	Q9BTT4	A_23_P124024	0.160553	9.19087	2.48595	0.0244528	0.681395	1
ENSG00000135077	HAVCR2	HAVR2_HUMAN	Q8TDQ0	A_23_P18903	0.237678	7.06894	2.4856	0.0244704	0.681395	1
ENSG00000212126	TAS2R50	T2R50_HUMAN	P59544	A_23_P347029	-0.167299	7.18456	-2.48443	0.0245278	0.681395	1
ENSG00000164741	DLC1	RHG07_HUMAN	Q96QB1	A_24_P940115	-0.209696	10.7452	-2.48411	0.0245435	0.681395	1
ENSG00000278984	RBMY1B	RBY1B_HUMAN	A6NDE4	A_24_P400604	-0.261815	6.9554	-2.48403	0.0245473	0.681395	1
ENSG00000279309	RBMY1D	RBY1D_HUMAN	P0C7P1	A_24_P400604	-0.261815	6.9554	-2.48403	0.0245473	0.681395	1
ENSG00000280343	RBMY1E	RBY1E_HUMAN	A6NEQ0	A_24_P400604	-0.261815	6.9554	-2.48403	0.0245473	0.681395	1
ENSG00000280386	RBMY1F	RBY1F_HUMAN	Q15415	A_24_P400604	-0.261815	6.9554	-2.48403	0.0245473	0.681395	1
ENSG00000280386	RBMY1J	RBY1F_HUMAN	Q15415	A_24_P400604	-0.261815	6.9554	-2.48403	0.0245473	0.681395	1
ENSG00000279323	RBMY1F	RBY1F_HUMAN	Q15415	A_24_P400604	-0.261815	6.9554	-2.48403	0.0245473	0.681395	1
ENSG00000279323	RBMY1J	RBY1F_HUMAN	Q15415	A_24_P400604	-0.261815	6.9554	-2.48403	0.0245473	0.681395	1
ENSG00000169811	-	-	-	A_24_P400604	-0.261815	6.9554	-2.48403	0.0245473	0.681395	1
ENSG00000242875	RBMY1A1	RBY1B_HUMAN	A6NDE4	A_24_P400604	-0.261815	6.9554	-2.48403	0.0245473	0.681395	1
ENSG00000242875	RBMY1B	RBY1B_HUMAN	A6NDE4	A_24_P400604	-0.261815	6.9554	-2.48403	0.0245473	0.681395	1
ENSG00000234414	RBMY1A1	RBY1A_HUMAN	P0DJD3	A_24_P400604	-0.261815	6.9554	-2.48403	0.0245473	0.681395	1
ENSG00000242389	RBMY1A1	RBY1E_HUMAN	A6NEQ0	A_24_P400604	-0.261815	6.9554	-2.48403	0.0245473	0.681395	1
ENSG00000242389	RBMY1E	RBY1E_HUMAN	A6NEQ0	A_24_P400604	-0.261815	6.9554	-2.48403	0.0245473	0.681395	1
ENSG00000244395	RBMY1A1	RBY1D_HUMAN	P0C7P1	A_24_P400604	-0.261815	6.9554	-2.48403	0.0245473	0.681395	1
ENSG00000244395	RBMY1D	RBY1D_HUMAN	P0C7P1	A_24_P400604	-0.261815	6.9554	-2.48403	0.0245473	0.681395	1
ENSG00000279934	RBMY1A1	RBY1A_HUMAN	P0DJD3	A_24_P400604	-0.261815	6.9554	-2.48403	0.0245473	0.681395	1
ENSG00000169800	RBMY1F	RBY1F_HUMAN	Q15415	A_24_P400604	-0.261815	6.9554	-2.48403	0.0245473	0.681395	1
ENSG00000169800	RBMY1J	RBY1F_HUMAN	Q15415	A_24_P400604	-0.261815	6.9554	-2.48403	0.0245473	0.681395	1
ENSG00000226941	RBMY1F	RBY1F_HUMAN	Q15415	A_24_P400604	-0.261815	6.9554	-2.48403	0.0245473	0.681395	1
ENSG00000226941	RBMY1J	RBY1F_HUMAN	Q15415	A_24_P400604	-0.261815	6.9554	-2.48403	0.0245473	0.681395	1
ENSG00000204936	CD177	CD177_HUMAN	Q8N6Q3	A_23_P259863	-0.243959	8.36459	-2.4836	0.0245685	0.681395	1
ENSG00000008311	AASS	AASS_HUMAN	Q9UDR5	A_23_P8754	0.267029	11.228	2.48301	0.0245977	0.681395	1
ENSG00000114861	FOXP1	FOXP1_HUMAN	Q9H334	A_23_P155257	0.163649	11.4195	2.48241	0.0246273	0.681395	1
ENSG00000102265	TIMP1	TIMP1_HUMAN	P01033	A_23_P62115	-0.204417	11.8674	-2.48159	0.0246676	0.681395	1
ENSG00000180042	-	-	-	A_24_P101439	0.212321	6.9503	2.48145	0.0246744	0.681395	1
ENSG00000174898	CATSPERD	CTSRD_HUMAN	Q86XM0	A_23_P340822	-0.200508	6.9975	-2.48132	0.0246812	0.681395	1
ENSG00000185436	IFNLR1	INLR1_HUMAN	Q8IU57	A_24_P19677	0.175503	8.05535	2.48034	0.0247296	0.681395	1
ENSG00000135387	CAPRIN1	CAPR1_HUMAN	Q14444	A_24_P107208	-0.155425	9.3775	-2.48017	0.024738	0.681395	1
ENSG00000131196	NFATC1	NFAC1_HUMAN	O95644	A_24_P258846	-0.181782	8.8401	-2.47996	0.0247483	0.681395	1
ENSG00000277131	MMEL1	MMEL1_HUMAN	Q495T6	A_23_P138294	0.200581	7.02427	2.4787	0.0248108	0.681395	1
ENSG00000142606	MMEL1	MMEL1_HUMAN	Q495T6	A_23_P138294	0.200581	7.02427	2.4787	0.0248108	0.681395	1
ENSG00000125144	MT1G	MT1G_HUMAN	P13640	A_23_P206707	0.467493	8.8641	2.47845	0.0248233	0.681395	1
ENSG00000149600	COMMD7	COMD7_HUMAN	Q86VX2	A_32_P141724	-0.197527	10.1026	-2.47841	0.0248255	0.681395	1
ENSG00000205277	MUC12	MUC12_HUMAN	Q9UKN1	A_24_P798028	-0.240602	7.04134	-2.47814	0.0248385	0.681395	1
ENSG00000138604	GLCE	-	-	A_23_P151870	-0.16583	8.15798	-2.47801	0.0248449	0.681395	1
ENSG00000168214	RBPJ	SUH_HUMAN	Q06330	A_23_P29994	0.210347	12.4499	2.4773	0.0248806	0.681395	1
ENSG00000161940	BCL6B	BCL6B_HUMAN	Q8N143	A_23_P324813	0.15756	7.20607	2.47664	0.0249132	0.681395	1
ENSG00000159860	-	-	-	A_23_P397978	0.183578	7.09348	2.47627	0.0249316	0.681395	1
ENSG00000170379	FAM115C	F115C_HUMAN	A6NFQ2	A_23_P397978	0.183578	7.09348	2.47627	0.0249316	0.681395	1
ENSG00000243696	-	-	-	A_23_P109881	0.339794	8.72222	2.47555	0.0249677	0.681395	1
ENSG00000055955	ITIH4	ITIH4_HUMAN	Q14624	A_23_P109881	0.339794	8.72222	2.47555	0.0249677	0.681395	1
ENSG00000132718	SYT11	SYT11_HUMAN	Q9BT88	A_24_P248240	0.207443	7.69318	2.47507	0.0249916	0.681395	1
ENSG00000235275	-	-	-	A_24_P247233	-0.25296	13.5252	-2.4747	0.0250102	0.681395	1
ENSG00000107186	MPDZ	MPDZ_HUMAN	O75970	A_23_P396328	0.191764	9.69799	2.47463	0.0250137	0.681395	1
ENSG00000274805	-	-	-	A_23_P26557	0.200175	12.727	2.4744	0.0250256	0.681395	1
ENSG00000162062	C16orf59	CP059_HUMAN	Q7L2K0	A_23_P26557	0.200175	12.727	2.4744	0.0250256	0.681395	1
ENSG00000007062	PROM1	PROM1_HUMAN	O43490	A_23_P258463	0.261098	8.93989	2.47427	0.025032	0.681395	1
ENSG00000164647	STEAP1	STEA1_HUMAN	Q9UHE8	A_24_P406334	0.173029	8.5106	2.47405	0.0250429	0.681395	1
ENSG00000197580	BCO2	BCDO2_HUMAN	Q9BYV7	A_23_P116187	0.272883	7.05013	2.47348	0.0250715	0.681395	1
ENSG00000178828	RNF186	RN186_HUMAN	Q9NXI6	A_23_P126248	-0.244202	6.97281	-2.47328	0.0250816	0.681395	1
ENSG00000204983	PRSS1	TRY1_HUMAN	P07477	A_23_P380754	-0.267497	9.34422	-2.47326	0.0250825	0.681395	1
ENSG00000113441	LNPEP	LCAP_HUMAN	Q9UIQ6	A_24_P237559	-0.180312	7.19065	-2.47292	0.0250995	0.681395	1
ENSG00000170290	SLN	SARCO_HUMAN	O00631	A_23_P150343	-0.240461	7.17747	-2.47261	0.0251153	0.681395	1
ENSG00000181218	HIST3H2A	H2A3_HUMAN	Q7L7L0	A_23_P149301	-0.224793	12.9136	-2.47248	0.0251216	0.681395	1
ENSG00000130635	COL5A1	CO5A1_HUMAN	P20908	A_23_P158593	-0.169952	10.5884	-2.47205	0.0251432	0.681395	1
ENSG00000234439	-	-	-	A_24_P16230	-0.253115	13.3254	-2.47151	0.0251705	0.681395	1
ENSG00000182612	TSPAN10	TSN10_HUMAN	Q9H1Z9	A_24_P213643	-0.15478	7.79952	-2.47125	0.0251835	0.681395	1
ENSG00000100399	CHADL	CHADL_HUMAN	Q6NUI6	A_24_P340286	0.22975	8.58751	2.47115	0.0251886	0.681395	1
ENSG00000144847	IGSF11	IGS11_HUMAN	Q5DX21	A_23_P132684	-0.225948	7.18485	-2.47089	0.025202	0.681395	1
ENSG00000101654	RNMT	MCES_HUMAN	O43148	A_24_P48408	0.167547	8.27406	2.47084	0.0252043	0.681395	1
ENSG00000221957	-	-	-	A_23_P502590	0.22572	7.05967	2.47007	0.0252435	0.681605	1
ENSG00000108984	MAP2K6	MP2K6_HUMAN	P52564	A_23_P207445	0.188323	9.99799	2.46924	0.025285	0.681605	1
ENSG00000197043	ANXA6	ANXA6_HUMAN	P08133	A_23_P357104	-0.184302	11.934	-2.469	0.0252972	0.681605	1
ENSG00000214193	SH3D21	SH321_HUMAN	A4FU49	A_23_P307536	0.226931	8.16301	2.46861	0.0253172	0.681605	1
ENSG00000075426	FOSL2	FOSL2_HUMAN	P15408	A_23_P348121	-0.170174	7.5196	-2.46839	0.0253282	0.681605	1
ENSG00000166257	SCN3B	SCN3B_HUMAN	Q9NY72	A_24_P381278	0.192282	6.98356	2.46714	0.0253914	0.68286	1
ENSG00000155099	TMEM55A	TM55A_HUMAN	Q8N4L2	A_23_P422083	0.160725	10.2046	2.46609	0.0254449	0.683191	1
ENSG00000104331	IMPAD1	IMPA3_HUMAN	Q9NX62	A_24_P240732	-0.175127	9.58014	-2.4656	0.0254698	0.683191	1
ENSG00000105443	CYTH2	CYH2_HUMAN	Q99418	A_23_P119377	-0.185374	10.512	-2.46531	0.0254848	0.683191	1
ENSG00000105443	pp9943	CYH2_HUMAN	Q99418	A_23_P119377	-0.185374	10.512	-2.46531	0.0254848	0.683191	1
ENSG00000268465	-	-	-	A_23_P119377	-0.185374	10.512	-2.46531	0.0254848	0.683191	1
ENSG00000269751	-	-	-	A_23_P119377	-0.185374	10.512	-2.46531	0.0254848	0.683191	1
ENSG00000123307	NEUROD4	NDF4_HUMAN	Q9HD90	A_23_P87625	-0.186836	6.9927	-2.46527	0.0254868	0.683191	1
ENSG00000133612	AGAP3	AGAP3_HUMAN	Q96P47	A_23_P111452	0.17292	12.2225	2.46319	0.025593	0.684853	1
ENSG00000173198	CYSLTR1	CLTR1_HUMAN	Q9Y271	A_24_P915225	-0.163626	6.74883	-2.46123	0.0256937	0.684853	1
ENSG00000061936	SFSWAP	SFSWA_HUMAN	Q12872	A_32_P109704	-0.174487	10.2192	-2.46064	0.0257236	0.684853	1
ENSG00000250057	-	-	-	A_24_P937904	0.24968	6.90949	2.46053	0.0257297	0.684853	1
ENSG00000260025	-	-	-	A_32_P206839	0.191866	10.5447	2.4597	0.0257725	0.684853	1
ENSG00000127989	MTERF1	MTEF1_HUMAN	Q99551	A_23_P408108	0.152763	8.35649	2.45967	0.0257738	0.684853	1
ENSG00000058063	ATP11B	AT11B_HUMAN	Q9Y2G3	A_24_P111737	-0.186279	8.49888	-2.45943	0.0257863	0.684853	1
ENSG00000183625	CCR3	CCR3_HUMAN	P51677	A_23_P250302	0.18254	6.87621	2.45941	0.0257869	0.684853	1
ENSG00000146469	VIP	VIP_HUMAN	P01282	A_23_P19650	0.196122	7.00366	2.45892	0.0258126	0.684853	1
ENSG00000189127	ANKRD34B	AN34B_HUMAN	A5PLL1	A_24_P916073	-0.281961	6.81947	-2.4589	0.0258133	0.684853	1
ENSG00000273409	-	-	-	A_24_P393550	-0.267816	6.86952	-2.4588	0.0258185	0.684853	1
ENSG00000107562	CXCL12	SDF1_HUMAN	P48061	A_23_P202448	0.203458	8.3819	2.45813	0.0258533	0.684853	1
ENSG00000140479	PCSK6	PCSK6_HUMAN	P29122	A_23_P151907	-0.160813	7.34901	-2.45804	0.0258581	0.684853	1
ENSG00000166347	CYB5A	CYB5_HUMAN	P00167	A_23_P101208	0.190339	11.4216	2.4576	0.0258807	0.684853	1
ENSG00000106785	TRIM14	TRI14_HUMAN	Q14142	A_23_P334083	-0.157863	7.13283	-2.45688	0.0259181	0.684853	1
ENSG00000144119	C1QL2	C1QL2_HUMAN	Q7Z5L3	A_23_P50928	-0.248416	7.08523	-2.45681	0.0259215	0.684853	1
ENSG00000204644	ZFP57	ZFP57_HUMAN	Q9NU63	A_32_P80245	0.214936	7.68302	2.4566	0.0259322	0.684853	1
ENSG00000163864	NMNAT3	NMNA3_HUMAN	Q96T66	A_24_P260134	0.185082	7.31984	2.45627	0.0259493	0.684864	1
ENSG00000259316	-	-	-	A_24_P932757	0.184525	6.99561	2.45542	0.0259938	0.68534	1
ENSG00000166803	KIAA0101	PAF15_HUMAN	Q15004	A_24_P932757	0.184525	6.99561	2.45542	0.0259938	0.68534	1
ENSG00000187778	MCRS1	MCRS1_HUMAN	Q96EZ8	A_23_P48237	-0.158307	11.4947	-2.45528	0.0260007	0.68534	1
ENSG00000171659	GPR34	GPR34_HUMAN	Q9UPC5	A_23_P11201	0.206852	7.08826	2.45495	0.0260182	0.685362	1
ENSG00000116560	SFPQ	SFPQ_HUMAN	P23246	A_24_P105283	-0.179723	9.85593	-2.45456	0.0260382	0.685451	1
ENSG00000106070	GRB10	GRB10_HUMAN	Q13322	A_24_P235266	-0.223582	13.122	-2.45399	0.0260678	0.68579	1
ENSG00000234741	-	-	-	A_24_P686956	0.242749	10.2987	2.45361	0.0260879	0.68588	1
ENSG00000247095	-	-	-	A_24_P886966	0.226771	7.69938	2.45264	0.0261382	0.686008	1
ENSG00000162493	PDPN	PDPN_HUMAN	Q86YL7	A_24_P299685	0.248061	10.9568	2.45253	0.0261441	0.686008	1
ENSG00000159202	UBE2Z	UBE2Z_HUMAN	Q9H832	A_24_P339305	-0.224994	9.31248	-2.45169	0.0261879	0.686008	1
ENSG00000196260	SFTA2	SFTA2_HUMAN	Q6UW10	A_24_P149248	-0.237574	7.04918	-2.45118	0.0262149	0.686008	1
ENSG00000230072	SFTA2	SFTA2_HUMAN	Q6UW10	A_24_P149248	-0.237574	7.04918	-2.45118	0.0262149	0.686008	1
ENSG00000206465	SFTA2	SFTA2_HUMAN	Q6UW10	A_24_P149248	-0.237574	7.04918	-2.45118	0.0262149	0.686008	1
ENSG00000225454	SFTA2	SFTA2_HUMAN	Q6UW10	A_24_P149248	-0.237574	7.04918	-2.45118	0.0262149	0.686008	1
ENSG00000237814	SFTA2	SFTA2_HUMAN	Q6UW10	A_24_P149248	-0.237574	7.04918	-2.45118	0.0262149	0.686008	1
ENSG00000224246	-	-	-	A_24_P149248	-0.237574	7.04918	-2.45118	0.0262149	0.686008	1
ENSG00000157216	SSBP3	SSBP3_HUMAN	Q9BWW4	A_24_P375453	-0.253056	9.65189	-2.45074	0.0262379	0.686008	1
ENSG00000233225	-	-	-	A_24_P375453	-0.253056	9.65189	-2.45074	0.0262379	0.686008	1
ENSG00000124812	CRISP1	CRIS1_HUMAN	P54107	A_23_P133722	-0.257377	7.007	-2.45064	0.026243	0.686008	1
ENSG00000010327	STAB1	-	-	A_24_P119456	0.214205	6.92901	2.44986	0.0262841	0.686272	1
ENSG00000100473	COCH	COCH_HUMAN	O43405	A_24_P184803	0.2534	11.147	2.44928	0.0263142	0.686272	1
ENSG00000196660	SLC30A10	ZNT10_HUMAN	Q6XR72	A_23_P86242	-0.167914	7.10357	-2.44917	0.02632	0.686272	1
ENSG00000119801	YPEL5	YPEL5_HUMAN	P62699	A_23_P108835	-0.163969	12.3101	-2.44912	0.0263226	0.686272	1
ENSG00000140854	KATNB1	KTNB1_HUMAN	Q9BVA0	A_23_P117980	-0.176965	9.17686	-2.44832	0.0263648	0.68646	1
ENSG00000229921	-	-	-	A_23_P93109	0.197424	7.13606	2.44749	0.0264086	0.68646	1
ENSG00000197879	MYO1C	MYO1C_HUMAN	O00159	A_23_P416656	-0.236757	9.16188	-2.44728	0.0264197	0.68646	1
ENSG00000232239	-	-	-	A_24_P796652	0.188138	10.6833	2.44713	0.0264273	0.68646	1
ENSG00000227924	-	-	-	A_24_P796652	0.188138	10.6833	2.44713	0.0264273	0.68646	1
ENSG00000234217	-	-	-	A_24_P796652	0.188138	10.6833	2.44713	0.0264273	0.68646	1
ENSG00000274181	-	-	-	A_24_P796652	0.188138	10.6833	2.44713	0.0264273	0.68646	1
ENSG00000204262	COL5A2	CO5A2_HUMAN	P05997	A_23_P10391	-0.247151	12.1781	-2.44607	0.0264835	0.686779	1
ENSG00000241343	RPL36A	RL36A_HUMAN	P83881	A_24_P224998	0.290236	7.97288	2.44606	0.026484	0.686779	1
ENSG00000122729	ACO1	ACOC_HUMAN	P21399	A_23_P9415	0.164089	10.4658	2.44557	0.0265102	0.686779	1
ENSG00000241476	SSX2	SSX2_HUMAN	Q16385	A_23_P33881	-0.267635	11.2994	-2.44489	0.0265461	0.686779	1
ENSG00000241476	SSX2B	SSX2_HUMAN	Q16385	A_23_P33881	-0.267635	11.2994	-2.44489	0.0265461	0.686779	1
ENSG00000268447	SSX2	SSX2_HUMAN	Q16385	A_23_P33881	-0.267635	11.2994	-2.44489	0.0265461	0.686779	1
ENSG00000268447	SSX2B	SSX2_HUMAN	Q16385	A_23_P33881	-0.267635	11.2994	-2.44489	0.0265461	0.686779	1
ENSG00000227302	-	-	-	A_23_P33881	-0.267635	11.2994	-2.44489	0.0265461	0.686779	1
ENSG00000171483	SSX6	SSX6_HUMAN	Q7RTT6	A_23_P33881	-0.267635	11.2994	-2.44489	0.0265461	0.686779	1
ENSG00000268009	SSX4	SSX4_HUMAN	O60224	A_23_P33881	-0.267635	11.2994	-2.44489	0.0265461	0.686779	1
ENSG00000268009	SSX4B	SSX4_HUMAN	O60224	A_23_P33881	-0.267635	11.2994	-2.44489	0.0265461	0.686779	1
ENSG00000269791	SSX4	SSX4_HUMAN	O60224	A_23_P33881	-0.267635	11.2994	-2.44489	0.0265461	0.686779	1
ENSG00000269791	SSX4B	SSX4_HUMAN	O60224	A_23_P33881	-0.267635	11.2994	-2.44489	0.0265461	0.686779	1
ENSG00000231317	-	-	-	A_24_P723655	-0.218451	6.85653	-2.44395	0.0265956	0.686779	1
ENSG00000078369	GNB1	GBB1_HUMAN	P62873	A_23_P22926	-0.165584	12.3672	-2.44384	0.0266014	0.686779	1
ENSG00000230707	-	-	-	A_24_P580698	0.171143	7.47249	2.44381	0.026603	0.686779	1
ENSG00000280287	-	-	-	A_24_P941020	0.2357	6.98215	2.44379	0.0266041	0.686779	1
ENSG00000197889	MEIG1	MEIG1_HUMAN	Q5JSS6	A_32_P175715	0.202034	7.11579	2.44296	0.0266485	0.686779	1
ENSG00000104879	CKM	KCRM_HUMAN	P06732	A_23_P50250	0.203383	7.21007	2.44224	0.0266869	0.686779	1
ENSG00000101306	MYLK2	MYLK2_HUMAN	Q9H1R3	A_23_P80008	-0.140193	7.56398	-2.44218	0.0266899	0.686779	1
ENSG00000197959	DNM3	DYN3_HUMAN	Q9UQ16	A_23_P371266	0.188066	7.97089	2.44146	0.026728	0.686779	1
ENSG00000226185	-	-	-	A_24_P676200	-0.200622	6.86946	-2.44086	0.0267601	0.686779	1
ENSG00000143839	REN	RENI_HUMAN	P00797	A_24_P919974	-0.186402	7.04755	-2.44085	0.0267607	0.686779	1
ENSG00000272968	RBAK-RBAKDN	-	-	A_24_P643041	-0.227657	10.5665	-2.44084	0.0267616	0.686779	1
ENSG00000196204	-	-	-	A_24_P643041	-0.227657	10.5665	-2.44084	0.0267616	0.686779	1
ENSG00000008323	PLEKHG6	PKHG6_HUMAN	Q3KR16	A_24_P301063	-0.194842	7.68129	-2.43982	0.0268157	0.686779	1
ENSG00000249382	-	-	-	A_32_P43769	0.228694	6.86651	2.43975	0.0268194	0.686779	1
ENSG00000136156	ITM2B	ITM2B_HUMAN	Q9Y287	A_24_P381604	0.176101	10.5598	2.43946	0.0268353	0.686779	1
ENSG00000196230	TUBB	TBB5_HUMAN	P07437	A_23_P387057	-0.17677	13.3066	-2.43938	0.0268394	0.686779	1
ENSG00000076356	PLXNA2	PLXA2_HUMAN	O75051	A_23_P46618	-0.294563	11.5307	-2.4393	0.0268439	0.686779	1
ENSG00000116580	GON4L	GON4L_HUMAN	Q3T8J9	A_24_P342670	0.186524	7.18854	2.43887	0.026867	0.686779	1
ENSG00000085721	RRN3	RRN3_HUMAN	Q9NYV6	A_23_P206877	-0.188472	7.71516	-2.43879	0.0268711	0.686779	1
ENSG00000176531	PHLDB3	PHLB3_HUMAN	Q6NSJ2	A_32_P170879	0.180514	7.09125	2.43871	0.0268752	0.686779	1
ENSG00000146001	-	-	-	A_23_P390958	0.314935	7.10052	2.43838	0.0268927	0.686779	1
ENSG00000205268	PDE7A	PDE7A_HUMAN	Q13946	A_23_P123478	-0.235391	9.53439	-2.43759	0.0269356	0.686779	1
ENSG00000075151	EIF4G3	IF4G3_HUMAN	O43432	A_23_P126241	-0.205788	11.1639	-2.43748	0.026941	0.686779	1
ENSG00000235649	-	-	-	A_23_P258136	-0.218026	9.76214	-2.43644	0.0269973	0.6868	1
ENSG00000101825	MXRA5	MXRA5_HUMAN	Q9NR99	A_23_P258136	-0.218026	9.76214	-2.43644	0.0269973	0.6868	1
ENSG00000172469	MANEA	MANEA_HUMAN	Q5SRI9	A_24_P69274	-0.249887	12.0867	-2.43615	0.0270127	0.6868	1
ENSG00000173402	DAG1	DAG1_HUMAN	Q14118	A_24_P225961	-0.221308	11.7842	-2.43575	0.0270346	0.6868	1
ENSG00000062282	DGAT2	DGAT2_HUMAN	Q96PD7	A_24_P295791	-0.286558	9.17976	-2.43574	0.0270352	0.6868	1
ENSG00000107249	GLIS3	GLIS3_HUMAN	Q8NEA6	A_23_P350249	-0.201559	7.63733	-2.43561	0.0270421	0.6868	1
ENSG00000132436	FIGNL1	FIGL1_HUMAN	Q6PIW4	A_23_P302681	0.197776	7.77935	2.43268	0.0272006	0.689971	1
ENSG00000124496	BCAR2	TREF1_HUMAN	Q96PN7	A_23_P59022	0.212361	9.09745	2.43119	0.0272815	0.690843	1
ENSG00000124496	TRERF1	TREF1_HUMAN	Q96PN7	A_23_P59022	0.212361	9.09745	2.43119	0.0272815	0.690843	1
ENSG00000259863	-	-	-	A_24_P734341	0.195719	6.95535	2.43092	0.0272961	0.690843	1
ENSG00000198785	GRIN3A	NMD3A_HUMAN	Q8TCU5	A_23_P347541	-0.178295	7.54993	-2.4308	0.0273022	0.690843	1
ENSG00000122512	PMS2	PMS2_HUMAN	P54278	A_32_P140706	-0.206549	9.04218	-2.42968	0.0273635	0.691968	1
ENSG00000187953	-	-	-	A_32_P140706	-0.206549	9.04218	-2.42968	0.0273635	0.691968	1
ENSG00000165655	ZNF503	ZN503_HUMAN	Q96F45	A_23_P202484	-0.202668	7.30471	-2.42898	0.0274014	0.692224	1
ENSG00000170776	AKAP13	AKP13_HUMAN	Q12802	A_24_P164337	-0.237379	8.18165	-2.42855	0.0274252	0.692224	1
ENSG00000182230	FAM153B	F153B_HUMAN	P0C7A2	A_32_P436743	-0.211928	7.00458	-2.42851	0.0274275	0.692224	1
ENSG00000170074	FAM153A	F153A_HUMAN	Q9UHL3	A_32_P436743	-0.211928	7.00458	-2.42851	0.0274275	0.692224	1
ENSG00000064666	CNN2	CNN2_HUMAN	Q99439	A_24_P142743	-0.216781	14.184	-2.42826	0.027441	0.692224	1
ENSG00000165804	ZNF219	ZN219_HUMAN	Q9P2Y4	A_24_P35891	0.183623	11.7988	2.42748	0.0274837	0.692335	1
ENSG00000206530	CFAP44	CFA44_HUMAN	Q96MT7	A_23_P110090	0.191237	7.01481	2.42743	0.0274865	0.692335	1
ENSG00000183688	FAM101B	F101B_HUMAN	Q8N5W9	A_24_P299318	0.334509	11.1566	2.42726	0.0274959	0.692335	1
ENSG00000226287	-	-	-	A_23_P166336	0.147577	11.0946	2.42581	0.0275754	0.692934	1
ENSG00000272514	C6orf165	CF165_HUMAN	Q8IYR0	A_23_P385980	-0.189264	7.15716	-2.42547	0.0275938	0.692934	1
ENSG00000185046	ANKS1B	ANS1B_HUMAN	Q7Z6G8	A_23_P21842	-0.203033	8.07012	-2.42546	0.0275942	0.692934	1
ENSG00000253426	-	-	-	A_24_P634602	0.217433	7.93043	2.42529	0.0276039	0.692934	1
ENSG00000214517	PPME1	PPME1_HUMAN	Q9Y570	A_24_P4701	-0.17277	7.7018	-2.42465	0.0276388	0.692934	1
ENSG00000145335	SNCA	SYUA_HUMAN	P37840	A_23_P29939	0.185158	8.88777	2.42395	0.0276777	0.692934	1
ENSG00000166748	AGBL1	CBPC4_HUMAN	Q96MI9	A_23_P309930	-0.209138	6.93425	-2.4233	0.0277134	0.692934	1
ENSG00000174469	CNTNAP2	CNTP2_HUMAN	Q9UHC6	A_23_P84399	-0.20608	15.2777	-2.42319	0.0277196	0.692934	1
ENSG00000107018	RLN1	REL1_HUMAN	P04808	A_23_P60210	0.1852	7.34307	2.42308	0.0277252	0.692934	1
ENSG00000095932	SMIM24	SIM24_HUMAN	O75264	A_23_P397120	-0.20543	7.17995	-2.42287	0.0277373	0.692934	1
ENSG00000171451	DSEL	DSEL_HUMAN	Q8IZU8	A_24_P365180	-0.185393	7.52412	-2.42267	0.0277484	0.692934	1
ENSG00000176402	GJC3	CXG3_HUMAN	Q8NFK1	A_23_P59869	0.187529	8.10334	2.42244	0.0277607	0.692934	1
ENSG00000167615	LENG8	LENG8_HUMAN	Q96PV6	A_24_P40061	0.159811	8.10142	2.42232	0.0277674	0.692934	1
ENSG00000146267	FAXC	FAXC_HUMAN	Q5TGI0	A_23_P168167	0.159926	9.06784	2.42223	0.0277727	0.692934	1
ENSG00000147041	SYTL5	SYTL5_HUMAN	Q8TDW5	A_24_P14776	0.20234	7.23394	2.42072	0.0278562	0.693588	1
ENSG00000112977	DAP	DAP1_HUMAN	P51397	A_24_P243278	-0.184973	8.5659	-2.41958	0.0279192	0.693588	1
ENSG00000068383	INPP5A	I5P1_HUMAN	Q14642	A_23_P202307	-0.156853	7.83279	-2.41927	0.0279366	0.693588	1
ENSG00000090470	PDCD7	PDCD7_HUMAN	Q8N8D1	A_24_P159181	-0.187247	10.8409	-2.41851	0.0279788	0.693588	1
ENSG00000161652	IZUMO2	IZUM2_HUMAN	Q6UXV1	A_23_P101521	0.184495	7.85729	2.41831	0.02799	0.693588	1
ENSG00000113645	WWC1	KIBRA_HUMAN	Q8IX03	A_24_P920758	0.196076	7.09314	2.41805	0.0280044	0.693588	1
ENSG00000122034	GTF3A	TF3A_HUMAN	Q92664	A_23_P25525	0.149472	13.0218	2.41775	0.0280211	0.693588	1
ENSG00000140598	EFTUD1	ETUD1_HUMAN	Q7Z2Z2	A_24_P754817	-0.173074	7.71136	-2.41744	0.0280385	0.693588	1
ENSG00000259404	-	-	-	A_24_P754817	-0.173074	7.71136	-2.41744	0.0280385	0.693588	1
ENSG00000182199	SHMT2	GLYM_HUMAN	P34897	A_23_P158239	-0.156303	11.5559	-2.41681	0.0280739	0.693588	1
ENSG00000225683	-	-	-	A_32_P110225	-0.172352	7.09419	-2.41652	0.02809	0.693588	1
ENSG00000223784	-	-	-	A_32_P15466	0.267408	7.87935	2.41624	0.0281057	0.693588	1
ENSG00000276550	-	-	-	A_23_P48973	-0.25613	8.20947	-2.41613	0.0281115	0.693588	1
ENSG00000128731	HERC2	HERC2_HUMAN	O95714	A_23_P48973	-0.25613	8.20947	-2.41613	0.0281115	0.693588	1
ENSG00000180229	-	-	-	A_23_P48973	-0.25613	8.20947	-2.41613	0.0281115	0.693588	1
ENSG00000206149	-	-	-	A_23_P48973	-0.25613	8.20947	-2.41613	0.0281115	0.693588	1
ENSG00000181019	NQO1	NQO1_HUMAN	P15559	A_23_P206661	-0.210056	7.74097	-2.41608	0.0281146	0.693588	1
ENSG00000271776	-	-	-	A_24_P481411	-0.191401	6.94475	-2.41604	0.0281168	0.693588	1
ENSG00000233381	-	-	-	A_23_P200524	-0.1755	10.3741	-2.41599	0.0281196	0.693588	1
ENSG00000162433	AK4	KAD4_HUMAN	P27144	A_23_P200524	-0.1755	10.3741	-2.41599	0.0281196	0.693588	1
ENSG00000263535	-	-	-	A_23_P200524	-0.1755	10.3741	-2.41599	0.0281196	0.693588	1
ENSG00000144681	STAC	STAC_HUMAN	Q99469	A_24_P234415	0.251964	7.71452	2.41427	0.0282158	0.695127	1
ENSG00000241399	CD302	CD302_HUMAN	Q8IX05	A_24_P396702	0.187752	7.51546	2.4139	0.0282367	0.695226	1
ENSG00000184731	FAM110C	F110C_HUMAN	Q1W6H9	A_32_P47643	0.216519	8.22657	2.41338	0.0282657	0.695523	1
ENSG00000149403	GRIK4	GRIK4_HUMAN	Q16099	A_23_P116249	0.198385	7.30922	2.41251	0.0283149	0.696027	1
ENSG00000129682	FGF13	FGF13_HUMAN	Q92913	A_24_P85009	-0.233272	8.7658	-2.41159	0.0283666	0.696027	1
ENSG00000272767	-	-	-	A_24_P278273	-0.250747	8.52742	-2.41149	0.0283722	0.696027	1
ENSG00000124935	SCGB1D2	SG1D2_HUMAN	O95969	A_23_P150555	-0.226695	7.14264	-2.41106	0.0283967	0.696027	1
ENSG00000197024	ZNF398	ZN398_HUMAN	Q8TD17	A_32_P151875	0.257802	11.1806	2.41052	0.028427	0.696027	1
ENSG00000014164	ZC3H3	ZC3H3_HUMAN	Q8IXZ2	A_23_P9036	-0.166112	8.64515	-2.41024	0.0284429	0.696027	1
ENSG00000153933	DGKE	DGKE_HUMAN	P52429	A_23_P141163	0.171653	6.8915	2.40989	0.0284627	0.696027	1
ENSG00000088035	ALG6	ALG6_HUMAN	Q9Y672	A_23_P35168	0.148212	10.3434	2.40988	0.0284633	0.696027	1
ENSG00000197381	ADARB1	RED1_HUMAN	P78563	A_23_P211207	0.222947	9.46167	2.40857	0.0285376	0.696027	1
ENSG00000140479	PCSK6	PCSK6_HUMAN	P29122	A_24_P189997	0.217693	7.25712	2.4079	0.0285757	0.696027	1
ENSG00000213062	-	-	-	A_32_P532738	-0.179316	7.01738	-2.40659	0.02865	0.696027	1
ENSG00000227404	-	-	-	A_24_P843309	-0.366229	8.43075	-2.40541	0.0287172	0.696027	1
ENSG00000147869	CER1	CER1_HUMAN	O95813	A_23_P329798	-0.329576	13.5044	-2.40529	0.028724	0.696027	1
ENSG00000176165	FOXG1	FOXG1_HUMAN	P55316	A_23_P205428	-0.212214	7.06073	-2.40521	0.0287286	0.696027	1
ENSG00000106868	SUSD1	SUSD1_HUMAN	Q6UWL2	A_23_P216610	0.180026	8.37115	2.40486	0.0287488	0.696027	1
ENSG00000152669	CCNO	CCNO_HUMAN	P22674	A_23_P92860	-0.238058	8.59304	-2.40444	0.0287725	0.696027	1
ENSG00000140832	MARVELD3	MALD3_HUMAN	Q96A59	A_23_P376372	-0.191945	7.59296	-2.40427	0.0287825	0.696027	1
ENSG00000188820	FAM26F	FA26F_HUMAN	Q5R3K3	A_23_P7827	0.180548	7.79755	2.40416	0.0287888	0.696027	1
ENSG00000197965	MPZL1	MPZL1_HUMAN	O95297	A_24_P242391	-0.201224	9.21021	-2.40398	0.028799	0.696027	1
ENSG00000163605	PPP4R2	PP4R2_HUMAN	Q9NY27	A_32_P228775	-0.201215	9.83397	-2.40368	0.0288161	0.696027	1
ENSG00000131187	F12	FA12_HUMAN	P00748	A_23_P167674	0.160682	9.71476	2.40361	0.0288203	0.696027	1
ENSG00000172209	GPR22	GPR22_HUMAN	Q99680	A_23_P20172	-0.212675	6.94215	-2.40347	0.0288282	0.696027	1
ENSG00000186281	GPAT2	GPAT2_HUMAN	Q6NUI2	A_24_P712271	0.204257	6.98118	2.40333	0.0288359	0.696027	1
ENSG00000237510	-	-	-	A_24_P712271	0.204257	6.98118	2.40333	0.0288359	0.696027	1
ENSG00000246705	H2AFJ	H2AJ_HUMAN	Q9BTM1	A_23_P204277	0.159368	12.7663	2.40243	0.028888	0.696027	1
ENSG00000187775	DNAH17	DYH17_HUMAN	Q9UFH2	A_32_P439662	0.220515	7.04844	2.40234	0.0288929	0.696027	1
ENSG00000196090	PTPRT	PTPRT_HUMAN	O14522	A_32_P36404	-0.229727	8.21945	-2.4022	0.028901	0.696027	1
ENSG00000174307	PHLDA3	PHLA3_HUMAN	Q9Y5J5	A_23_P62959	0.244339	11.438	2.40119	0.028959	0.696027	1
ENSG00000171608	PIK3CD	PK3CD_HUMAN	O00329	A_23_P259833	-0.149552	7.18466	-2.40107	0.0289658	0.696027	1
ENSG00000251432	-	-	-	A_32_P29200	0.182836	7.38293	2.40012	0.0290205	0.696027	1
ENSG00000128408	RIBC2	RIBC2_HUMAN	Q9H4K1	A_23_P166526	0.181744	8.13513	2.39964	0.0290481	0.696027	1
ENSG00000077279	DCX	DCX_HUMAN	O43602	A_23_P500328	-0.229122	7.69695	-2.39932	0.0290668	0.696027	1
ENSG00000170837	GPR27	GPR27_HUMAN	Q9NS67	A_23_P385835	-0.225783	7.14142	-2.39916	0.0290758	0.696027	1
ENSG00000141279	NPEPPS	PSA_HUMAN	P55786	A_23_P164331	-0.291329	9.75068	-2.39874	0.0291004	0.696027	1
ENSG00000122741	DCAF10	DCA10_HUMAN	Q5QP82	A_32_P133005	0.204581	6.96354	2.39871	0.029102	0.696027	1
ENSG00000248265	-	-	-	A_24_P516246	0.230241	6.87297	2.39826	0.0291281	0.696027	1
ENSG00000149922	TBX6	TBX6_HUMAN	O95947	A_23_P206568	0.194356	9.04742	2.3981	0.0291375	0.696027	1
ENSG00000164483	SAMD3	SAMD3_HUMAN	Q8N6K7	A_23_P93524	-0.237787	10.7457	-2.39802	0.0291417	0.696027	1
ENSG00000227678	-	-	-	A_23_P93524	-0.237787	10.7457	-2.39802	0.0291417	0.696027	1
ENSG00000165325	CCDC67	DEUP1_HUMAN	Q05D60	A_32_P113047	-0.241119	6.98436	-2.39788	0.02915	0.696027	1
ENSG00000175224	ATG13	ATG13_HUMAN	O75143	A_23_P95292	-0.213596	10.7173	-2.39721	0.0291888	0.696143	1
ENSG00000075643	MOCOS	MOCOS_HUMAN	Q96EN8	A_23_P67042	0.210928	7.81463	2.39684	0.0292103	0.696253	1
ENSG00000071537	SEL1L	SE1L1_HUMAN	Q9UBV2	A_24_P219114	0.170923	7.25876	2.39567	0.0292782	0.697239	1
ENSG00000148296	SURF6	SURF6_HUMAN	O75683	A_24_P21447	0.17381	9.88022	2.39554	0.0292856	0.697239	1
ENSG00000265565	-	-	-	A_23_P81859	-0.292095	13.5745	-2.39473	0.029333	0.697825	1
ENSG00000274997	HIST1H2AH	H2A1H_HUMAN	Q96KK5	A_23_P81859	-0.292095	13.5745	-2.39473	0.029333	0.697825	1
ENSG00000186452	TMPRSS12	TMPSC_HUMAN	Q86WS5	A_32_P44534	-0.206584	7.0778	-2.39426	0.0293605	0.697825	1
ENSG00000260822	-	-	-	A_32_P214503	0.153431	9.87177	2.39424	0.0293612	0.697825	1
ENSG00000126254	RBM42	RBM42_HUMAN	Q9BTD8	A_23_P90444	-0.154087	11.6993	-2.39316	0.0294246	0.698476	1
ENSG00000106367	AP1S1	AP1S1_HUMAN	P61966	A_24_P63950	0.164944	8.03537	2.39304	0.0294315	0.698476	1
ENSG00000150076	CCDC7	-	-	A_32_P114028	0.211336	6.95994	2.3929	0.0294396	0.698476	1
ENSG00000170075	GPR37L1	ETBR2_HUMAN	O60883	A_24_P145633	0.200764	7.16113	2.39144	0.0295248	0.699765	1
ENSG00000198131	ZNF544	ZN544_HUMAN	Q6NX49	A_23_P141856	0.175564	11.3248	2.39114	0.0295423	0.699765	1
ENSG00000139725	RHOF	RHOF_HUMAN	Q9HBH0	A_24_P104115	-0.171029	7.83547	-2.39098	0.029552	0.699765	1
ENSG00000260230	FRRS1L	FRS1L_HUMAN	Q9P0K9	A_32_P10083	0.176737	7.46777	2.39081	0.029562	0.699765	1
ENSG00000227954	-	-	-	A_24_P706236	0.199372	6.96176	2.38976	0.0296238	0.700525	1
ENSG00000125772	GPCPD1	GPCP1_HUMAN	Q9NPB8	A_23_P91350	0.168539	8.97833	2.38886	0.0296763	0.700525	1
ENSG00000183625	CCR3	CCR3_HUMAN	P51677	A_24_P367473	0.171789	7.54096	2.3872	0.0297742	0.700525	1
ENSG00000259823	LYPD8	-	-	A_24_P164998	0.279731	6.93623	2.38709	0.0297805	0.700525	1
ENSG00000069966	GNB5	GBB5_HUMAN	O14775	A_24_P911571	0.179737	7.37166	2.38682	0.0297967	0.700525	1
ENSG00000133250	ZNF414	ZN414_HUMAN	Q96IQ9	A_23_P340922	-0.187496	8.42206	-2.38682	0.029797	0.700525	1
ENSG00000033122	LRRC7	LRRC7_HUMAN	Q96NW7	A_32_P323	0.232791	7.02318	2.38667	0.0298056	0.700525	1
ENSG00000110077	MS4A6A	M4A6A_HUMAN	Q9H2W1	A_23_P203376	-0.23344	6.90767	-2.38652	0.0298144	0.700525	1
ENSG00000130830	MPP1	EM55_HUMAN	Q00013	A_23_P171296	0.171286	10.7114	2.38629	0.0298278	0.700525	1
ENSG00000144554	FANCD2	FACD2_HUMAN	Q9BXW9	A_32_P24165	0.15954	11.9379	2.38564	0.0298668	0.700525	1
ENSG00000134369	NAV1	NAV1_HUMAN	Q8NEY1	A_23_P103561	-0.284625	9.37523	-2.38563	0.0298669	0.700525	1
ENSG00000204843	DCTN1	DCTN1_HUMAN	Q14203	A_23_P142835	-0.277626	11.7799	-2.38513	0.0298969	0.700592	1
ENSG00000204843	DKFZp686E0752	DCTN1_HUMAN	Q14203	A_23_P142835	-0.277626	11.7799	-2.38513	0.0298969	0.700592	1
ENSG00000158691	ZSCAN12	ZSC12_HUMAN	O43309	A_23_P323898	-0.225529	7.23016	-2.3847	0.0299224	0.700592	1
ENSG00000132466	ANKRD17	ANR17_HUMAN	O75179	A_23_P144378	-0.19281	12.0626	-2.38431	0.0299452	0.700592	1
ENSG00000152292	SH2D6	SH2D6_HUMAN	Q7Z4S9	A_24_P120147	0.200879	7.06396	2.38379	0.0299763	0.700592	1
ENSG00000120149	MSX2	MSX2_HUMAN	P35548	A_24_P132006	0.300033	8.22836	2.3836	0.0299878	0.700592	1
ENSG00000236287	ZBED5	ZBED5_HUMAN	Q49AG3	A_23_P98483	0.148528	12.2831	2.38357	0.0299891	0.700592	1
ENSG00000213958	-	-	-	A_24_P418687	-0.237866	14.0435	-2.38285	0.0300322	0.700802	1
ENSG00000142634	EFHD2	EFHD2_HUMAN	Q96C19	A_24_P251053	-0.204674	10.2921	-2.38228	0.0300662	0.701199	1
ENSG00000105669	COPE	COPE_HUMAN	O14579	A_24_P399622	-0.182513	11.3736	-2.38196	0.0300852	0.701242	1
ENSG00000268193	-	-	-	A_24_P399622	-0.182513	11.3736	-2.38196	0.0300852	0.701242	1
ENSG00000121053	EPX	PERE_HUMAN	P11678	A_23_P89192	-0.236732	6.96728	-2.38014	0.0301941	0.701957	1
ENSG00000279862	-	-	-	A_24_P419388	-0.173998	7.04707	-2.38007	0.0301982	0.701957	1
ENSG00000121318	TAS2R10	T2R10_HUMAN	Q9NYW0	A_23_P64888	-0.191932	7.20596	-2.38002	0.0302012	0.701957	1
ENSG00000157191	NECAP2	NECP2_HUMAN	Q9NVZ3	A_24_P302332	-0.153501	8.58868	-2.37893	0.0302663	0.701988	1
ENSG00000177047	IFNW1	IFNW1_HUMAN	P05000	A_23_P60373	-0.195974	6.97098	-2.37848	0.0302936	0.701988	1
ENSG00000129534	MIS18BP1	M18BP_HUMAN	Q6P0N0	A_24_P668821	-0.224306	7.39664	-2.37836	0.0303008	0.701988	1
ENSG00000204839	MROH6	MROH6_HUMAN	A6NGR9	A_23_P369634	0.21343	10.327	2.37828	0.0303051	0.701988	1
ENSG00000178796	RIIAD1	RIAD1_HUMAN	A6NNX1	A_24_P272748	-0.239805	7.15668	-2.37753	0.0303507	0.702355	1
ENSG00000145002	FAM86B1	F86B2_HUMAN	P0C5J1	A_24_P280868	0.174185	10.5184	2.37745	0.0303551	0.702355	1
ENSG00000145002	FAM86B2	F86B2_HUMAN	P0C5J1	A_24_P280868	0.174185	10.5184	2.37745	0.0303551	0.702355	1
ENSG00000186523	FAM86B1	F86B1_HUMAN	Q8N7N1	A_24_P280868	0.174185	10.5184	2.37745	0.0303551	0.702355	1
ENSG00000134668	SPOCD1	SPOC1_HUMAN	Q6ZMY3	A_23_P431388	0.211378	7.53228	2.37615	0.0304336	0.703774	1
ENSG00000140534	TICRR	TICRR_HUMAN	Q7Z2Z1	A_24_P942335	0.234938	8.38001	2.37551	0.030472	0.703775	1
ENSG00000226287	-	-	-	A_24_P787889	0.173217	10.3814	2.37509	0.0304973	0.703775	1
ENSG00000206140	-	-	-	A_24_P787889	0.173217	10.3814	2.37509	0.0304973	0.703775	1
ENSG00000278558	TMEM191B	-	-	A_24_P787889	0.173217	10.3814	2.37509	0.0304973	0.703775	1
ENSG00000213005	-	-	-	A_23_P60016	0.172991	9.30584	2.37505	0.0304995	0.703775	1
ENSG00000103148	C16orf35	NPRL3_HUMAN	Q12980	A_23_P100326	0.173885	12.6491	2.37371	0.0305806	0.703775	1
ENSG00000103148	NPRL3	NPRL3_HUMAN	Q12980	A_23_P100326	0.173885	12.6491	2.37371	0.0305806	0.703775	1
ENSG00000172020	GAP43	NEUM_HUMAN	P17677	A_23_P253446	0.320665	8.82472	2.37348	0.0305947	0.703775	1
ENSG00000164326	CARTPT	CART_HUMAN	Q16568	A_23_P167493	0.205061	7.01835	2.37186	0.0306932	0.703775	1
ENSG00000183010	PYCR1	P5CR1_HUMAN	P32322	A_24_P204358	-0.293552	10.1348	-2.37184	0.0306944	0.703775	1
ENSG00000008196	TFAP2B	AP2B_HUMAN	Q92481	A_24_P20954	-0.185266	7.00853	-2.37173	0.0307011	0.703775	1
ENSG00000118997	DNAH7	DYH7_HUMAN	Q8WXX0	A_24_P410776	0.253249	7.03044	2.3714	0.030721	0.703775	1
ENSG00000163884	KLF15	KLF15_HUMAN	Q9UIH9	A_24_P20327	0.22618	8.37692	2.37069	0.0307643	0.703775	1
ENSG00000164256	PRDM9	PRDM9_HUMAN	Q9NQV7	A_23_P7612	0.175043	7.18285	2.3701	0.0308	0.703775	1
ENSG00000006831	ADIPOR2	ADR2_HUMAN	Q86V24	A_24_P13376	-0.174584	9.32672	-2.36982	0.0308174	0.703775	1
ENSG00000111057	KRT18	K1C18_HUMAN	P05783	A_23_P99320	-0.207314	15.5356	-2.36952	0.0308355	0.703775	1
ENSG00000175224	ATG13	ATG13_HUMAN	O75143	A_24_P295601	-0.227226	9.45129	-2.36948	0.0308382	0.703775	1
ENSG00000145757	SPATA9	SPAT9_HUMAN	Q9BWV2	A_23_P390576	-0.18444	7.01011	-2.36913	0.0308592	0.703775	1
ENSG00000128656	CHN1	CHIN_HUMAN	P15882	A_23_P79482	0.155427	11.3187	2.36886	0.030876	0.703775	1
ENSG00000276180	HIST1H4A	H4_HUMAN	P62805	A_24_P20873	-0.228022	11.6963	-2.36864	0.0308892	0.703775	1
ENSG00000276180	HIST1H4B	H4_HUMAN	P62805	A_24_P20873	-0.228022	11.6963	-2.36864	0.0308892	0.703775	1
ENSG00000276180	HIST1H4C	H4_HUMAN	P62805	A_24_P20873	-0.228022	11.6963	-2.36864	0.0308892	0.703775	1
ENSG00000276180	HIST1H4D	H4_HUMAN	P62805	A_24_P20873	-0.228022	11.6963	-2.36864	0.0308892	0.703775	1
ENSG00000276180	HIST1H4E	H4_HUMAN	P62805	A_24_P20873	-0.228022	11.6963	-2.36864	0.0308892	0.703775	1
ENSG00000276180	HIST1H4F	H4_HUMAN	P62805	A_24_P20873	-0.228022	11.6963	-2.36864	0.0308892	0.703775	1
ENSG00000276180	HIST1H4H	H4_HUMAN	P62805	A_24_P20873	-0.228022	11.6963	-2.36864	0.0308892	0.703775	1
ENSG00000276180	HIST1H4I	H4_HUMAN	P62805	A_24_P20873	-0.228022	11.6963	-2.36864	0.0308892	0.703775	1
ENSG00000276180	HIST1H4J	H4_HUMAN	P62805	A_24_P20873	-0.228022	11.6963	-2.36864	0.0308892	0.703775	1
ENSG00000276180	HIST1H4K	H4_HUMAN	P62805	A_24_P20873	-0.228022	11.6963	-2.36864	0.0308892	0.703775	1
ENSG00000276180	HIST1H4L	H4_HUMAN	P62805	A_24_P20873	-0.228022	11.6963	-2.36864	0.0308892	0.703775	1
ENSG00000276180	HIST2H4A	H4_HUMAN	P62805	A_24_P20873	-0.228022	11.6963	-2.36864	0.0308892	0.703775	1
ENSG00000276180	HIST2H4B	H4_HUMAN	P62805	A_24_P20873	-0.228022	11.6963	-2.36864	0.0308892	0.703775	1
ENSG00000276180	HIST4H4	H4_HUMAN	P62805	A_24_P20873	-0.228022	11.6963	-2.36864	0.0308892	0.703775	1
ENSG00000164588	HCN1	HCN1_HUMAN	O60741	A_23_P113019	0.237235	7.38565	2.36852	0.0308965	0.703775	1
ENSG00000139053	PDE6H	CNCG_HUMAN	Q13956	A_23_P64913	-0.202981	7.06808	-2.36848	0.0308988	0.703775	1
ENSG00000231158	-	-	-	A_23_P28397	0.180881	7.36006	2.36752	0.0309575	0.703775	1
ENSG00000078177	N4BP2	N4BP2_HUMAN	Q86UW6	A_24_P222114	-0.173594	9.18511	-2.36739	0.0309658	0.703775	1
ENSG00000101104	PABPC1L	PAP1L_HUMAN	Q4VXU2	A_24_P92183	0.351676	10.5857	2.36731	0.0309703	0.703775	1
ENSG00000275552	-	-	-	A_24_P16686	0.205989	7.04899	2.36725	0.0309744	0.703775	1
ENSG00000152208	GRID2	GRID2_HUMAN	O43424	A_32_P229221	0.315759	9.13139	2.36622	0.0310377	0.703775	1
ENSG00000231898	-	-	-	A_32_P179548	0.228258	7.01515	2.36577	0.0310648	0.703775	1
ENSG00000099917	MED15	MED15_HUMAN	Q96RN5	A_24_P207727	-0.152842	10.0233	-2.36528	0.0310954	0.703775	1
ENSG00000188958	UTS2B	UTS2B_HUMAN	Q765I0	A_32_P225659	-0.201228	6.93299	-2.36458	0.0311383	0.703775	1
ENSG00000107140	TESK1	TESK1_HUMAN	Q15569	A_24_P341882	-0.176228	8.03265	-2.36436	0.0311518	0.703775	1
ENSG00000179299	NSUN7	NSUN7_HUMAN	Q8NE18	A_32_P136269	0.168055	8.8998	2.3643	0.0311555	0.703775	1
ENSG00000144406	UNC80	UNC80_HUMAN	Q8N2C7	A_32_P447785	-0.165722	6.91828	-2.36362	0.0311976	0.703775	1
ENSG00000123444	KBTBD4	KBTB4_HUMAN	Q9NVX7	A_23_P202696	0.216269	9.65138	2.36348	0.0312064	0.703775	1
ENSG00000105135	ILVBL	ILVBL_HUMAN	A1L0T0	A_23_P165148	0.191536	11.481	2.36337	0.0312128	0.703775	1
ENSG00000157193	LRP8	LRP8_HUMAN	Q14114	A_23_P34325	-0.190287	9.75032	-2.36301	0.031235	0.703775	1
ENSG00000234964	-	-	-	A_32_P204676	0.244969	13.9849	2.36249	0.0312674	0.703775	1
ENSG00000164687	FABP5	FABP5_HUMAN	Q01469	A_32_P204676	0.244969	13.9849	2.36249	0.0312674	0.703775	1
ENSG00000101160	CTSZ	CATZ_HUMAN	Q9UBR2	A_23_P40240	-0.215098	8.88864	-2.36233	0.0312773	0.703775	1
ENSG00000204071	TCEAL6	TCAL6_HUMAN	Q6IPX3	A_32_P192545	0.171719	11.2898	2.36193	0.0313018	0.703775	1
ENSG00000161551	ZNF577	ZN577_HUMAN	Q9BSK1	A_23_P208198	0.190802	9.73186	2.36154	0.0313261	0.703775	1
ENSG00000131080	EDA2R	TNR27_HUMAN	Q9HAV5	A_23_P171132	0.210457	7.14046	2.36144	0.031332	0.703775	1
ENSG00000164244	PRRC1	PRRC1_HUMAN	Q96M27	A_23_P92948	-0.18384	10.6358	-2.3607	0.0313784	0.703775	1
ENSG00000173517	PEAK1	PEAK1_HUMAN	Q9H792	A_24_P109652	0.138944	9.81487	2.35999	0.031422	0.703775	1
ENSG00000267194	-	-	-	A_32_P44210	0.157365	8.53234	2.35949	0.0314533	0.703775	1
ENSG00000171163	ZNF692	ZN692_HUMAN	Q9BU19	A_23_P170978	0.295399	10.7069	2.35941	0.0314581	0.703775	1
ENSG00000130413	STK33	STK33_HUMAN	Q9BYT3	A_23_P127915	0.146291	8.959	2.35927	0.0314667	0.703775	1
ENSG00000250685	-	-	-	A_32_P935688	0.189615	7.25684	2.35915	0.0314745	0.703775	1
ENSG00000076770	MBNL3	MBNL3_HUMAN	Q9NUK0	A_32_P165297	-0.176359	7.90322	-2.3585	0.0315147	0.703775	1
ENSG00000164330	EBF1	COE1_HUMAN	Q9UH73	A_32_P197561	0.196878	7.12419	2.35698	0.0316094	0.703775	1
ENSG00000169900	PYDC1	PYDC1_HUMAN	Q8WXC3	A_23_P407614	0.182215	7.93787	2.35656	0.031636	0.703775	1
ENSG00000088726	TMEM40	TMM40_HUMAN	Q8WWA1	A_23_P29551	0.166713	7.89017	2.35633	0.03165	0.703775	1
ENSG00000179912	R3HDM2	R3HD2_HUMAN	Q9Y2K5	A_24_P207907	-0.223935	7.46098	-2.35628	0.0316537	0.703775	1
ENSG00000139200	PIANP	PIANP_HUMAN	Q8IYJ0	A_24_P248185	-0.16979	8.95717	-2.35626	0.0316545	0.703775	1
ENSG00000167390	-	-	-	A_24_P315346	0.166025	7.07585	2.35596	0.0316734	0.703775	1
ENSG00000158639	PAGE5	PAGE5_HUMAN	Q96GU1	A_23_P22744	-0.196784	7.79387	-2.35562	0.031695	0.703775	1
ENSG00000151490	PTPRO	PTPRO_HUMAN	Q16827	A_23_P204304	-0.172142	6.8661	-2.3554	0.0317085	0.703775	1
ENSG00000169871	TRIM56	TRI56_HUMAN	Q9BRZ2	A_23_P350107	0.200449	9.40099	2.35539	0.0317094	0.703775	1
ENSG00000177943	MAMDC4	AEGP_HUMAN	Q6UXC1	A_23_P71790	0.318425	8.80247	2.35517	0.0317227	0.703775	1
ENSG00000176124	DLEU1	LEU1_HUMAN	O43261	A_24_P918930	0.201533	6.95462	2.35491	0.0317392	0.703775	1
ENSG00000237515	SHISA9	SHSA9_HUMAN	B4DS77	A_32_P213091	0.233919	9.46357	2.35489	0.0317402	0.703775	1
ENSG00000145431	PDGFC	PDGFC_HUMAN	Q9NRA1	A_24_P163168	-0.181265	7.05668	-2.35479	0.0317464	0.703775	1
ENSG00000118705	RPN2	RPN2_HUMAN	P04844	A_23_P108994	-0.190924	12.4121	-2.35453	0.0317632	0.703775	1
ENSG00000197746	PSAP	SAP_HUMAN	P07602	A_23_P12680	-0.171737	13.3988	-2.35441	0.0317706	0.703775	1
ENSG00000127418	FGFRL1	FGRL1_HUMAN	Q8N441	A_23_P92349	-0.256857	11.9302	-2.35355	0.0318248	0.703775	1
ENSG00000105438	KDELR1	ERD21_HUMAN	P24390	A_23_P4919	-0.276651	11.9054	-2.35315	0.0318496	0.703775	1
ENSG00000160172	-	-	-	A_32_P6221	-0.166653	7.97468	-2.35281	0.0318714	0.703775	1
ENSG00000259207	ITGB3	ITB3_HUMAN	P05106	A_23_P38519	-0.143087	7.1963	-2.3528	0.0318718	0.703775	1
ENSG00000259207	integrin beta 3	ITB3_HUMAN	P05106	A_23_P38519	-0.143087	7.1963	-2.3528	0.0318718	0.703775	1
ENSG00000152133	GPATCH11	GPT11_HUMAN	Q8N954	A_23_P339633	-0.214903	9.76949	-2.35255	0.0318874	0.703775	1
ENSG00000117115	PADI2	PADI2_HUMAN	Q9Y2J8	A_23_P201747	-0.140223	7.45162	-2.35253	0.0318887	0.703775	1
ENSG00000197024	ZNF398	ZN398_HUMAN	Q8TD17	A_32_P43855	0.198885	7.6837	2.35228	0.0319043	0.703775	1
ENSG00000279760	TSPY4	TSPY4_HUMAN	P0CV99	A_24_P221869	0.200022	6.92102	2.35205	0.0319188	0.703775	1
ENSG00000280203	TSPY3	TSPY3_HUMAN	P0CV98	A_24_P221869	0.200022	6.92102	2.35205	0.0319188	0.703775	1
ENSG00000280313	TSPY1	TSPY1_HUMAN	Q01534	A_24_P221869	0.200022	6.92102	2.35205	0.0319188	0.703775	1
ENSG00000278940	TSPY8	TSPY8_HUMAN	P0CW00	A_24_P221869	0.200022	6.92102	2.35205	0.0319188	0.703775	1
ENSG00000279506	TSPY3	TSPY3_HUMAN	P0CV98	A_24_P221869	0.200022	6.92102	2.35205	0.0319188	0.703775	1
ENSG00000279293	TSPY1	TSPY1_HUMAN	Q01534	A_24_P221869	0.200022	6.92102	2.35205	0.0319188	0.703775	1
ENSG00000233803	TSPY4	TSPY4_HUMAN	P0CV99	A_24_P221869	0.200022	6.92102	2.35205	0.0319188	0.703775	1
ENSG00000229549	TSPY8	TSPY8_HUMAN	P0CW00	A_24_P221869	0.200022	6.92102	2.35205	0.0319188	0.703775	1
ENSG00000188656	-	-	-	A_24_P221869	0.200022	6.92102	2.35205	0.0319188	0.703775	1
ENSG00000228927	TSPY10	TSPY3_HUMAN	P0CV98	A_24_P221869	0.200022	6.92102	2.35205	0.0319188	0.703775	1
ENSG00000228927	TSPY3	TSPY3_HUMAN	P0CV98	A_24_P221869	0.200022	6.92102	2.35205	0.0319188	0.703775	1
ENSG00000258992	LOC728395	TSPY1_HUMAN	Q01534	A_24_P221869	0.200022	6.92102	2.35205	0.0319188	0.703775	1
ENSG00000258992	TSPY1	TSPY1_HUMAN	Q01534	A_24_P221869	0.200022	6.92102	2.35205	0.0319188	0.703775	1
ENSG00000238074	TSPY6P	-	-	A_24_P221869	0.200022	6.92102	2.35205	0.0319188	0.703775	1
ENSG00000270073	-	-	-	A_24_P221869	0.200022	6.92102	2.35205	0.0319188	0.703775	1
ENSG00000236424	TSPY10	-	-	A_24_P221869	0.200022	6.92102	2.35205	0.0319188	0.703775	1
ENSG00000279308	TSPY2	TSPY2_HUMAN	A6NKD2	A_24_P221869	0.200022	6.92102	2.35205	0.0319188	0.703775	1
ENSG00000168757	TSPY2	TSPY2_HUMAN	A6NKD2	A_24_P221869	0.200022	6.92102	2.35205	0.0319188	0.703775	1
ENSG00000101265	RASSF2	RASF2_HUMAN	P50749	A_23_P166087	0.204188	9.6231	2.35176	0.031937	0.703775	1
ENSG00000197937	ZNF347	ZN347_HUMAN	Q96SE7	A_24_P310224	0.180372	8.66045	2.35163	0.0319457	0.703775	1
ENSG00000165813	CCDC186	CC186_HUMAN	Q7Z3E2	A_24_P942694	-0.174089	8.09373	-2.35143	0.031958	0.703775	1
ENSG00000214794	-	-	-	A_24_P350060	-0.182055	15.6542	-2.3513	0.0319663	0.703775	1
ENSG00000103495	MAZ	MAZ_HUMAN	P56270	A_23_P33433	-0.164841	9.15996	-2.35125	0.0319692	0.703775	1
ENSG00000108001	EBF3	COE3_HUMAN	Q9H4W6	A_32_P160127	-0.191094	7.54295	-2.35097	0.0319872	0.703775	1
ENSG00000175175	PPM1E	PPM1E_HUMAN	Q8WY54	A_32_P73796	0.198294	7.40885	2.35055	0.0320137	0.703775	1
ENSG00000183734	ASCL2	ASCL2_HUMAN	Q99929	A_23_P105088	-0.179964	7.2243	-2.3505	0.0320171	0.703775	1
ENSG00000198216	CACNA1E	CAC1E_HUMAN	Q15878	A_24_P911621	-0.196671	6.98722	-2.35035	0.0320265	0.703775	1
ENSG00000235821	-	-	-	A_24_P16124	-0.159007	15.1739	-2.34981	0.0320605	0.703775	1
ENSG00000140876	NUDT7	NUDT7_HUMAN	P0C024	A_23_P3602	0.20451	8.72869	2.34942	0.0320849	0.703775	1
ENSG00000143398	PIP5K1A	PI51A_HUMAN	Q99755	A_23_P368205	-0.201712	11.577	-2.34914	0.0321027	0.703775	1
ENSG00000203989	RHOXF2B	RHF2B_HUMAN	P0C7M4	A_24_P24060	0.196331	7.12672	2.34899	0.0321124	0.703775	1
ENSG00000131721	RHOXF2	RHXF2_HUMAN	Q9BQY4	A_24_P24060	0.196331	7.12672	2.34899	0.0321124	0.703775	1
ENSG00000103653	CSK	CSK_HUMAN	P41240	A_23_P152024	-0.164494	8.96054	-2.34877	0.0321263	0.703775	1
ENSG00000123200	ZC3H13	ZC3HD_HUMAN	Q5T200	A_24_P121406	-0.149812	7.0644	-2.34848	0.0321447	0.703775	1
ENSG00000255537	-	-	-	A_24_P170970	0.214028	6.92787	2.34825	0.0321591	0.703775	1
ENSG00000251493	FOXD1	FOXD1_HUMAN	Q16676	A_32_P34920	0.355503	8.14302	2.34777	0.0321899	0.703775	1
ENSG00000134207	SYT6	SYT6_HUMAN	Q5T7P8	A_23_P398947	0.254815	8.15756	2.34759	0.0322014	0.703775	1
ENSG00000100906	NFKBIA	IKBA_HUMAN	P25963	A_23_P106002	-0.200462	14.483	-2.34746	0.0322093	0.703775	1
ENSG00000256028	-	-	-	A_24_P184460	-0.160146	13.1169	-2.34666	0.0322604	0.703775	1
ENSG00000182196	ARL6IP4	AR6P4_HUMAN	Q66PJ3	A_24_P184460	-0.160146	13.1169	-2.34666	0.0322604	0.703775	1
ENSG00000106077	ABHD11	ABHDB_HUMAN	Q8NFV4	A_23_P315933	0.268802	13.1179	2.34655	0.0322673	0.703775	1
ENSG00000133026	MYH10	MYH10_HUMAN	P35580	A_24_P256764	-0.177305	8.22527	-2.34639	0.0322776	0.703775	1
ENSG00000058404	CAMK2B	KCC2B_HUMAN	Q13554	A_23_P42882	-0.27003	7.03706	-2.3463	0.0322832	0.703775	1
ENSG00000163347	CLDN1	CLD1_HUMAN	O95832	A_24_P165949	-0.199946	7.3637	-2.34592	0.0323077	0.703775	1
ENSG00000114904	NEK4	NEK4_HUMAN	P51957	A_23_P121276	-0.156968	9.39119	-2.345	0.0323662	0.703775	1
ENSG00000131242	RAB11FIP4	RFIP4_HUMAN	Q86YS3	A_24_P401909	-0.198037	7.83507	-2.34444	0.0324018	0.703775	1
ENSG00000179051	RCC2	RCC2_HUMAN	Q9P258	A_23_P74954	-0.170711	10.9389	-2.34436	0.0324069	0.703775	1
ENSG00000277893	SRD5A2	S5A2_HUMAN	P31213	A_23_P28186	-0.197768	7.15898	-2.3441	0.0324235	0.703775	1
ENSG00000167216	KATNAL2	KATL2_HUMAN	Q8IYT4	A_24_P927976	0.179508	7.19467	2.34337	0.0324703	0.703775	1
ENSG00000128573	FOXP2	FOXP2_HUMAN	O15409	A_24_P921683	0.200504	7.11705	2.34312	0.0324866	0.703775	1
ENSG00000165643	SOHLH1	SOLH1_HUMAN	Q5JUK2	A_24_P307964	0.184441	7.02273	2.34302	0.032493	0.703775	1
ENSG00000135220	UGT2A3	UD2A3_HUMAN	Q6UWM9	A_24_P334378	0.205823	6.90282	2.34298	0.0324956	0.703775	1
ENSG00000250612	-	-	-	A_24_P334378	0.205823	6.90282	2.34298	0.0324956	0.703775	1
ENSG00000107938	EDRF1	EDRF1_HUMAN	Q3B7T1	A_23_P1403	-0.171988	7.90931	-2.34295	0.0324977	0.703775	1
ENSG00000172061	LRRC15	LRC15_HUMAN	Q8TF66	A_23_P166584	-0.197527	6.9732	-2.34154	0.0325882	0.703775	1
ENSG00000171219	CDC42BPG	MRCKG_HUMAN	Q6DT37	A_23_P64051	0.189024	9.57872	2.34136	0.0325993	0.703775	1
ENSG00000225231	-	-	-	A_32_P83434	0.312292	6.86088	2.34092	0.0326275	0.703775	1
ENSG00000122008	POLK	POLK_HUMAN	Q9UBT6	A_24_P923478	-0.19936	7.03542	-2.34031	0.0326671	0.703775	1
ENSG00000186047	DLEU7	LEU7_HUMAN	Q6UYE1	A_32_P50326	0.143437	7.01311	2.33992	0.0326924	0.703775	1
ENSG00000171302	CANT1	CANT1_HUMAN	Q8WVQ1	A_23_P26759	-0.161175	8.75841	-2.33992	0.0326925	0.703775	1
ENSG00000111886	GABRR2	GBRR2_HUMAN	P28476	A_23_P93105	0.23995	7.08968	2.33984	0.0326974	0.703775	1
ENSG00000240979	-	-	-	A_23_P83094	0.206787	9.57819	2.33968	0.0327076	0.703775	1
ENSG00000106829	TLE4	TLE4_HUMAN	Q04727	A_23_P83094	0.206787	9.57819	2.33968	0.0327076	0.703775	1
ENSG00000155393	HEATR3	HEAT3_HUMAN	Q7Z4Q2	A_24_P138713	-0.166043	8.15226	-2.33949	0.03272	0.703775	1
ENSG00000221866	PLXNA4	PLXA4_HUMAN	Q9HCM2	A_24_P772488	-0.292875	8.69675	-2.33941	0.0327252	0.703775	1
ENSG00000164600	NEUROD6	NDF6_HUMAN	Q96NK8	A_23_P134340	0.229817	6.96118	2.33897	0.0327533	0.703775	1
ENSG00000168917	SLC35G2	S35G2_HUMAN	Q8TBE7	A_23_P109655	0.241542	8.22433	2.33874	0.0327681	0.703775	1
ENSG00000131669	NINJ1	NINJ1_HUMAN	Q92982	A_23_P169137	0.170011	11.9567	2.33856	0.0327799	0.703775	1
ENSG00000236609	ZNF853	ZN853_HUMAN	P0CG23	A_23_P302207	-0.178428	8.68801	-2.33792	0.0328211	0.703874	1
ENSG00000178764	ZHX2	ZHX2_HUMAN	Q9Y6X8	A_23_P168951	-0.166806	9.92874	-2.33782	0.0328281	0.703874	1
ENSG00000271698	TMEM249	-	-	A_24_P298587	0.187352	7.62116	2.3377	0.0328359	0.703874	1
ENSG00000261587	TMEM249	TM249_HUMAN	Q2WGJ8	A_24_P298587	0.187352	7.62116	2.3377	0.0328359	0.703874	1
ENSG00000158186	MRAS	RASM_HUMAN	O14807	A_24_P88850	0.163533	9.17413	2.33712	0.0328729	0.7043	1
ENSG00000256664	-	-	-	A_23_P139895	0.171309	9.97854	2.33683	0.0328921	0.704343	1
ENSG00000135679	MDM2	MDM2_HUMAN	Q00987	A_23_P139895	0.171309	9.97854	2.33683	0.0328921	0.704343	1
ENSG00000135679	MDM2 isoform KB9	MDM2_HUMAN	Q00987	A_23_P139895	0.171309	9.97854	2.33683	0.0328921	0.704343	1
ENSG00000135679	mdm2	MDM2_HUMAN	Q00987	A_23_P139895	0.171309	9.97854	2.33683	0.0328921	0.704343	1
ENSG00000279636	-	-	-	A_23_P128911	0.200881	7.11706	2.3361	0.0329394	0.704665	1
ENSG00000162927	PUS10	PUS10_HUMAN	Q3MIT2	A_23_P412029	-0.193046	7.19972	-2.33607	0.0329414	0.704665	1
ENSG00000064393	HIPK2	HIPK2_HUMAN	Q9H2X6	A_24_P500621	-0.257136	10.7176	-2.33537	0.0329868	0.704764	1
ENSG00000165644	COMTD1	CMTD1_HUMAN	Q86VU5	A_23_P115862	0.199305	12.0338	2.33479	0.0330245	0.704764	1
ENSG00000128973	CLN6	CLN6_HUMAN	Q9NWW5	A_23_P117797	-0.171793	10.3149	-2.33474	0.0330274	0.704764	1
ENSG00000011600	TYROBP	TYOBP_HUMAN	O43914	A_23_P27994	-0.252935	7.53904	-2.33468	0.0330318	0.704764	1
ENSG00000138709	LARP1B	LAR1B_HUMAN	Q659C4	A_24_P938465	-0.302829	10.706	-2.33416	0.0330658	0.705106	1
ENSG00000233369	-	-	-	A_32_P141374	-0.259395	10.9213	-2.3339	0.0330821	0.705106	1
ENSG00000275121	-	-	-	A_32_P141374	-0.259395	10.9213	-2.3339	0.0330821	0.705106	1
ENSG00000277053	-	-	-	A_32_P141374	-0.259395	10.9213	-2.3339	0.0330821	0.705106	1
ENSG00000274070	GATSL2	GATL2_HUMAN	A6NHX0	A_32_P141374	-0.259395	10.9213	-2.3339	0.0330821	0.705106	1
ENSG00000179403	VWA1	VWA1_HUMAN	Q6PCB0	A_23_P86089	0.16842	11.9279	2.33323	0.0331258	0.705671	1
ENSG00000162399	BSND	BSND_HUMAN	Q8WZ55	A_23_P23029	0.175233	7.42583	2.33236	0.033183	0.706392	1
ENSG00000184735	DDX53	DDX53_HUMAN	Q86TM3	A_32_P379105	-0.163437	7.01846	-2.33199	0.0332068	0.706392	1
ENSG00000196872	KIAA1211L	K121L_HUMAN	Q6NV74	A_24_P272313	0.17313	7.11668	2.33163	0.0332308	0.706392	1
ENSG00000165370	GPR101	GP101_HUMAN	Q96P66	A_23_P148389	0.280424	7.02062	2.33125	0.0332558	0.706392	1
ENSG00000253525	-	-	-	A_24_P464238	0.194206	7.05572	2.33114	0.0332628	0.706392	1
ENSG00000105085	MED26	MED26_HUMAN	O95402	A_23_P164737	0.154603	10.8869	2.33019	0.033325	0.707186	1
ENSG00000104164	BLOC1S6	BL1S6_HUMAN	Q9UL45	A_24_P27373	-0.179155	10.9277	-2.32913	0.033395	0.707371	1
ENSG00000168772	CXXC4	CXXC4_HUMAN	Q9H2H0	A_32_P66908	0.221482	7.66875	2.32782	0.033481	0.707976	1
ENSG00000183049	CAMK1D	KCC1D_HUMAN	Q8IU85	A_23_P124252	0.172982	7.81576	2.32745	0.0335051	0.707976	1
ENSG00000144452	ABCA12	ABCAC_HUMAN	Q86UK0	A_23_P56369	-0.181843	6.98357	-2.32691	0.0335409	0.707976	1
ENSG00000074803	SLC12A1	S12A1_HUMAN	Q13621	A_24_P136029	0.162127	6.85279	2.32687	0.0335437	0.707976	1
ENSG00000230102	-	-	-	A_24_P794529	0.162808	7.1826	2.32679	0.0335492	0.707976	1
ENSG00000122786	CALD1	CALD1_HUMAN	Q05682	A_24_P255524	0.174281	7.65242	2.32627	0.0335831	0.708072	1
ENSG00000127129	EDN2	EDN2_HUMAN	P20800	A_23_P312150	0.201859	7.12514	2.32575	0.0336175	0.708342	1
ENSG00000157911	PEX10	PEX10_HUMAN	O60683	A_32_P152400	-0.187666	6.89687	-2.32533	0.0336457	0.708342	1
ENSG00000165168	CYBB	CY24B_HUMAN	P04839	A_24_P365767	-0.162996	6.91473	-2.3253	0.0336476	0.708342	1
ENSG00000173262	SLC2A14	GTR14_HUMAN	Q8TDB8	A_32_P47754	-0.170588	15.6186	-2.32445	0.0337036	0.708354	1
ENSG00000179761	PIPOX	SOX_HUMAN	Q9P0Z9	A_23_P164258	0.19063	8.33567	2.32429	0.0337145	0.708354	1
ENSG00000165810	BTNL9	BTNL9_HUMAN	Q6UXG8	A_23_P81280	0.170464	6.97923	2.32425	0.0337172	0.708354	1
ENSG00000138867	C22orf13	GUCD1_HUMAN	Q96NT3	A_23_P17773	-0.220885	8.23181	-2.3233	0.0337799	0.708946	1
ENSG00000138867	GUCD1	GUCD1_HUMAN	Q96NT3	A_23_P17773	-0.220885	8.23181	-2.3233	0.0337799	0.708946	1
ENSG00000112130	RNF8	RNF8_HUMAN	O76064	A_24_P260699	-0.211988	7.1106	-2.3229	0.0338065	0.709029	1
ENSG00000272822	ARF3	-	-	A_23_P36521	-0.15005	10.4577	-2.32264	0.0338239	0.709029	1
ENSG00000134287	ARF3	ARF3_HUMAN	P61204	A_23_P36521	-0.15005	10.4577	-2.32264	0.0338239	0.709029	1
ENSG00000153283	CD96	TACT_HUMAN	P40200	A_23_P44155	0.169031	7.05234	2.32208	0.0338614	0.709029	1
ENSG00000002746	HECW1	HECW1_HUMAN	Q76N89	A_32_P166422	-0.159544	7.07516	-2.32171	0.0338862	0.709029	1
ENSG00000278570	NR2E3	NR2E3_HUMAN	Q9Y5X4	A_23_P205867	0.205315	7.25314	2.32171	0.0338863	0.709029	1
ENSG00000151553	FAM160B1	F16B1_HUMAN	Q5W0V3	A_24_P325107	-0.171574	8.27375	-2.32141	0.0339063	0.709029	1
ENSG00000261559	-	-	-	A_23_P168531	-0.231409	11.5099	-2.32136	0.0339094	0.709029	1
ENSG00000075618	FSCN1	FSCN1_HUMAN	Q16658	A_23_P168531	-0.231409	11.5099	-2.32136	0.0339094	0.709029	1
ENSG00000171517	LPAR3	LPAR3_HUMAN	Q9UBY5	A_23_P35035	0.254829	8.10233	2.32117	0.0339219	0.709029	1
ENSG00000164099	PRSS12	NETR_HUMAN	P56730	A_23_P121637	0.202264	7.89833	2.32055	0.0339632	0.709262	1
ENSG00000233834	-	-	-	A_32_P139391	0.239021	7.95033	2.32026	0.0339831	0.709262	1
ENSG00000183098	GPC6	GPC6_HUMAN	Q9Y625	A_23_P371682	-0.19172	8.44187	-2.31953	0.0340316	0.709262	1
ENSG00000066382	MPPED2	MPPD2_HUMAN	Q15777	A_23_P52888	-0.144041	8.29129	-2.31943	0.0340384	0.709262	1
ENSG00000006459	KDM7A	KDM7A_HUMAN	Q6ZMT4	A_23_P359897	-0.185256	9.72886	-2.31934	0.0340445	0.709262	1
ENSG00000254470	AP5B1	AP5B1_HUMAN	Q2VPB7	A_24_P9883	-0.177695	7.39284	-2.31874	0.0340846	0.709262	1
ENSG00000187193	MT1X	MT1X_HUMAN	P80297	A_24_P125096	0.378664	9.69507	2.31819	0.0341215	0.709262	1
ENSG00000182162	P2RY8	P2RY8_HUMAN	Q86VZ1	A_24_P340128	0.184141	7.00031	2.31808	0.0341291	0.709262	1
ENSG00000279890	-	-	-	A_24_P246518	0.18284	7.18493	2.31736	0.0341769	0.709262	1
ENSG00000166473	PKD1L2	PK1L2_HUMAN	Q7Z442	A_24_P246518	0.18284	7.18493	2.31736	0.0341769	0.709262	1
ENSG00000032742	IFT88	IFT88_HUMAN	Q13099	A_23_P48339	-0.150785	8.76113	-2.31686	0.0342109	0.709262	1
ENSG00000168016	TRANK1	TRNK1_HUMAN	O15050	A_23_P91859	-0.159838	7.21703	-2.31658	0.0342295	0.709262	1
ENSG00000206052	DOK6	DOK6_HUMAN	Q6PKX4	A_23_P352484	-0.223101	7.75035	-2.31633	0.0342468	0.709262	1
ENSG00000187498	COL4A1	CO4A1_HUMAN	P02462	A_24_P68342	-0.247094	8.27905	-2.31604	0.0342658	0.709262	1
ENSG00000144848	ATG3	ATG3_HUMAN	Q9NT62	A_23_P212706	0.166295	11.4341	2.31583	0.0342804	0.709262	1
ENSG00000101752	MIB1	MIB1_HUMAN	Q86YT6	A_24_P943156	-0.215797	9.09988	-2.31581	0.0342816	0.709262	1
ENSG00000167703	SLC43A2	LAT4_HUMAN	Q8N370	A_24_P296508	0.20455	8.94528	2.31349	0.0344382	0.709262	1
ENSG00000169174	PCSK9	PCSK9_HUMAN	Q8NBP7	A_32_P142440	0.191634	11.8849	2.31345	0.0344407	0.709262	1
ENSG00000170027	YWHAG	1433G_HUMAN	P61981	A_23_P123022	-0.163389	8.9656	-2.31321	0.0344568	0.709262	1
ENSG00000133606	MKRN1	MKRN1_HUMAN	Q9UHC7	A_24_P410627	-0.189587	10.8635	-2.31288	0.0344792	0.709262	1
ENSG00000214140	PRCD	PRCD_HUMAN	Q00LT1	A_24_P517252	-0.196829	7.16815	-2.31265	0.0344949	0.709262	1
ENSG00000138411	HECW2	HECW2_HUMAN	Q9P2P5	A_23_P50967	-0.186924	7.05034	-2.31242	0.0345104	0.709262	1
ENSG00000115556	PLCD4	PLCD4_HUMAN	Q9BRC7	A_23_P385105	-0.198611	7.15244	-2.31238	0.0345131	0.709262	1
ENSG00000055609	KMT2C	KMT2C_HUMAN	Q8NEZ4	A_23_P502241	-0.135556	7.51117	-2.3121	0.0345321	0.709262	1
ENSG00000205476	CCDC85C	CC85C_HUMAN	A6NKD9	A_24_P201960	-0.19252	8.57599	-2.31185	0.0345491	0.709262	1
ENSG00000124243	BCAS4	BCAS4_HUMAN	Q8TDM0	A_32_P23659	-0.181696	7.85595	-2.31179	0.0345532	0.709262	1
ENSG00000172175	MALT1	MALT1_HUMAN	Q9UDY8	A_24_P116909	0.208316	7.41561	2.31144	0.0345773	0.709262	1
ENSG00000215096	-	-	-	A_24_P15502	-0.161453	14.227	-2.3114	0.0345797	0.709262	1
ENSG00000110888	CAPRIN2	CAPR2_HUMAN	Q6IMN6	A_24_P56281	0.155628	8.50405	2.31028	0.034656	0.709262	1
ENSG00000204296	C6orf10	CF010_HUMAN	Q5SRN2	A_32_P221907	-0.188874	6.98119	-2.3102	0.0346619	0.709262	1
ENSG00000177731	FLII	FLII_HUMAN	Q13045	A_23_P4425	-0.180757	12.3655	-2.30988	0.0346836	0.709262	1
ENSG00000175414	ARL10	ARL10_HUMAN	Q8N8L6	A_32_P224751	-0.177945	7.58349	-2.3094	0.034716	0.709262	1
ENSG00000151292	CSNK1G3	KC1G3_HUMAN	Q9Y6M4	A_24_P937468	0.23101	6.85408	2.30919	0.0347306	0.709262	1
ENSG00000133135	RNF128	RN128_HUMAN	Q8TEB7	A_24_P340036	0.180914	7.03645	2.30829	0.0347918	0.709262	1
ENSG00000155275	TRMT44	TRM44_HUMAN	Q8IYL2	A_24_P337286	0.201214	7.00553	2.30827	0.0347928	0.709262	1
ENSG00000166682	TMPRSS5	TMPS5_HUMAN	Q9H3S3	A_23_P52797	0.226467	7.94331	2.30802	0.0348101	0.709262	1
ENSG00000204542	C6orf15	CF015_HUMAN	Q6UXA7	A_24_P72364	-0.215527	7.08363	-2.30801	0.0348111	0.709262	1
ENSG00000162078	ZG16B	ZG16B_HUMAN	Q96DA0	A_24_P356304	0.221019	6.95364	2.30796	0.0348141	0.709262	1
ENSG00000152127	MGAT5	MGT5A_HUMAN	Q09328	A_23_P16743	0.16234	7.23739	2.30788	0.0348196	0.709262	1
ENSG00000204613	TRIM10	TRI10_HUMAN	Q9UDY6	A_23_P420831	0.172225	7.29716	2.30769	0.034833	0.709262	1
ENSG00000008294	SPAG9	JIP4_HUMAN	O60271	A_23_P356041	-0.150888	7.94567	-2.30703	0.0348782	0.709262	1
ENSG00000171478	SPACA5	LYZL5_HUMAN	Q96QH8	A_24_P272254	0.233436	7.06371	2.30649	0.0349152	0.709262	1
ENSG00000171478	SPACA5B	LYZL5_HUMAN	Q96QH8	A_24_P272254	0.233436	7.06371	2.30649	0.0349152	0.709262	1
ENSG00000171489	SPACA5	LYZL5_HUMAN	Q96QH8	A_24_P272254	0.233436	7.06371	2.30649	0.0349152	0.709262	1
ENSG00000171489	SPACA5B	LYZL5_HUMAN	Q96QH8	A_24_P272254	0.233436	7.06371	2.30649	0.0349152	0.709262	1
ENSG00000130558	OLFM1	NOE1_HUMAN	Q99784	A_23_P219161	0.164195	10.2475	2.30616	0.0349378	0.709262	1
ENSG00000174574	AKIRIN1	AKIR1_HUMAN	Q9H9L7	A_23_P256142	-0.187958	9.94393	-2.30596	0.034951	0.709262	1
ENSG00000162398	C1orf177	CA177_HUMAN	Q3ZCV2	A_24_P94319	-0.165568	7.25835	-2.30583	0.03496	0.709262	1
ENSG00000141431	ASXL3	ASXL3_HUMAN	Q9C0F0	A_32_P389544	-0.173127	7.14917	-2.30578	0.0349635	0.709262	1
ENSG00000104635	SLC39A14	S39AE_HUMAN	Q15043	A_24_P333479	-0.190798	8.1009	-2.30539	0.0349903	0.709262	1
ENSG00000152061	RABGAP1L	RBG10_HUMAN	B7ZAP0	A_24_P333525	0.214443	9.38871	2.30514	0.0350078	0.709262	1
ENSG00000152061	RABGAP1L	RBG1L_HUMAN	Q5R372	A_24_P333525	0.214443	9.38871	2.30514	0.0350078	0.709262	1
ENSG00000182197	EXT1	EXT1_HUMAN	Q16394	A_23_P43273	-0.167982	10.2068	-2.30485	0.0350275	0.709262	1
ENSG00000105438	KDELR1	ERD21_HUMAN	P24390	A_23_P4913	-0.16136	12.3177	-2.30476	0.0350339	0.709262	1
ENSG00000164112	TMEM155	TM155_HUMAN	Q4W5P6	A_32_P210472	0.214097	6.87427	2.3044	0.0350585	0.709334	1
ENSG00000137720	C11orf1	CK001_HUMAN	Q9H5F2	A_24_P406934	-0.203042	6.94295	-2.30389	0.0350939	0.709702	1
ENSG00000258529	ALG9	-	-	A_32_P49188	0.153841	10.3103	2.30326	0.0351371	0.710225	1
ENSG00000086848	ALG9	ALG9_HUMAN	Q9H6U8	A_32_P49188	0.153841	10.3103	2.30326	0.0351371	0.710225	1
ENSG00000117154	IGSF21	IGS21_HUMAN	Q96ID5	A_32_P78101	0.218074	10.4045	2.3027	0.0351755	0.710653	1
ENSG00000134287	ARF3	ARF3_HUMAN	P61204	A_24_P187750	-0.169457	9.76703	-2.30159	0.0352522	0.711619	1
ENSG00000106785	TRIM14	TRI14_HUMAN	Q14142	A_24_P197964	0.183004	7.49754	2.30141	0.0352648	0.711619	1
ENSG00000054690	PLEKHH1	PKHH1_HUMAN	Q9ULM0	A_24_P134850	0.215043	8.26595	2.30126	0.0352753	0.711619	1
ENSG00000125257	ABCC4	MRP4_HUMAN	O15439	A_24_P16913	-0.263401	8.9314	-2.30017	0.0353508	0.7122	1
ENSG00000142197	DOPEY2	DOP2_HUMAN	Q9Y3R5	A_23_P253586	-0.17338	7.33606	-2.29991	0.0353689	0.7122	1
ENSG00000244625	-	-	-	A_24_P753331	-0.230231	7.02281	-2.29939	0.0354051	0.7122	1
ENSG00000100201	DDX17	DDX17_HUMAN	Q92841	A_23_P57534	-0.137836	8.75064	-2.2993	0.0354112	0.7122	1
ENSG00000147601	TERF1	TERF1_HUMAN	P54274	A_24_P192434	0.213183	11.9992	2.29924	0.0354155	0.7122	1
ENSG00000135778	NTPCR	NTPCR_HUMAN	Q9BSD7	A_23_P200252	0.216806	10.8434	2.29905	0.0354286	0.7122	1
ENSG00000156802	ATAD2	ATAD2_HUMAN	Q6PL18	A_24_P59596	-0.151522	8.02561	-2.29889	0.0354399	0.7122	1
ENSG00000213231	TCL1B	TCL1B_HUMAN	O95988	A_23_P48495	0.225315	8.11505	2.29823	0.0354854	0.7122	1
ENSG00000259084	-	-	-	A_23_P48495	0.225315	8.11505	2.29823	0.0354854	0.7122	1
ENSG00000101057	MYBL2	MYBB_HUMAN	P10244	A_23_P143190	-0.175556	11.2509	-2.29815	0.0354909	0.7122	1
ENSG00000079134	THOC1	THOC1_HUMAN	Q96FV9	A_23_P78372	0.213829	8.01517	2.29795	0.0355054	0.7122	1
ENSG00000182504	CEP97	CEP97_HUMAN	Q8IW35	A_24_P418294	-0.26616	9.1888	-2.29694	0.0355755	0.71266	1
ENSG00000107890	ANKRD26	ANR26_HUMAN	Q9UPS8	A_24_P85511	0.206207	7.33317	2.29607	0.0356362	0.71266	1
ENSG00000269994	-	-	-	A_32_P218766	0.19298	7.70207	2.29579	0.0356559	0.71266	1
ENSG00000163288	GABRB1	GBRB1_HUMAN	P18505	A_23_P125435	0.205522	7.02772	2.29578	0.0356564	0.71266	1
ENSG00000151327	FAM177A1	F177A_HUMAN	Q8N128	A_32_P18357	-0.164588	7.19302	-2.29576	0.0356579	0.71266	1
ENSG00000136244	IL6	IL6_HUMAN	P05231	A_23_P71037	0.209293	7.94269	2.29554	0.0356731	0.71266	1
ENSG00000124302	CHST8	CHST8_HUMAN	Q9H2A9	A_23_P90275	-0.193712	8.53855	-2.29518	0.0356988	0.71266	1
ENSG00000143341	HMCN1	HMCN1_HUMAN	Q96RW7	A_23_P148990	0.18427	7.97883	2.29508	0.0357057	0.71266	1
ENSG00000154359	LONRF1	LONF1_HUMAN	Q17RB8	A_32_P194032	-0.165402	11.2763	-2.29445	0.0357497	0.71266	1
ENSG00000145685	LHFPL2	LHPL2_HUMAN	Q6ZUX7	A_24_P349092	-0.210419	8.32507	-2.29433	0.0357581	0.71266	1
ENSG00000182318	ZSCAN22	ZSC22_HUMAN	P10073	A_24_P194730	-0.232527	7.49759	-2.29423	0.035765	0.71266	1
ENSG00000018408	WWTR1	WWTR1_HUMAN	Q9GZV5	A_32_P6868	0.171661	7.44379	2.29406	0.0357768	0.71266	1
ENSG00000138071	ACTR2	ARP2_HUMAN	P61160	A_24_P272352	-0.193297	10.6584	-2.29405	0.0357778	0.71266	1
ENSG00000213985	-	-	-	A_24_P272352	-0.193297	10.6584	-2.29405	0.0357778	0.71266	1
ENSG00000185745	IFIT1	IFIT1_HUMAN	P09914	A_23_P52266	0.249109	8.87508	2.29361	0.0358088	0.712808	1
ENSG00000138411	HECW2	HECW2_HUMAN	Q9P2P5	A_23_P50974	-0.15313	7.50909	-2.29345	0.0358199	0.712808	1
ENSG00000188641	DPYD	DPYD_HUMAN	Q12882	A_24_P410610	-0.196001	7.05303	-2.29237	0.0358954	0.713571	1
ENSG00000007038	PRSS21	TEST_HUMAN	Q9Y6M0	A_24_P339126	-0.201982	7.08593	-2.29206	0.0359174	0.713571	1
ENSG00000186526	CYP4F8	CP4F8_HUMAN	P98187	A_23_P131060	-0.144493	7.96335	-2.292	0.0359216	0.713571	1
ENSG00000165966	PDZRN4	PZRN4_HUMAN	Q6ZMN7	A_23_P105651	-0.264268	7.85922	-2.29127	0.0359729	0.713571	1
ENSG00000111837	MAK	MAK_HUMAN	P20794	A_23_P214839	-0.172326	7.08244	-2.29009	0.0360562	0.713571	1
ENSG00000106018	VIPR2	VIPR2_HUMAN	P41587	A_23_P145978	-0.202426	7.35159	-2.28958	0.0360927	0.713571	1
ENSG00000080511	RDH8	RDH8_HUMAN	Q9NYR8	A_23_P50291	-0.172073	7.00089	-2.28934	0.0361098	0.713571	1
ENSG00000231100	-	-	-	A_32_P735429	0.19056	7.0335	2.28923	0.0361169	0.713571	1
ENSG00000139946	PELI2	PELI2_HUMAN	Q9HAT8	A_23_P65532	0.237903	8.49582	2.28884	0.0361446	0.713571	1
ENSG00000103196	CRISPLD2	CRLD2_HUMAN	Q9H0B8	A_24_P136619	0.20766	7.4092	2.28861	0.0361614	0.713571	1
ENSG00000121310	ECHDC2	ECHD2_HUMAN	Q86YB7	A_23_P200203	0.319274	11.15	2.28823	0.0361878	0.713571	1
ENSG00000188107	EYS	EYS_HUMAN	Q5T1H1	A_24_P944973	0.305598	7.15676	2.2882	0.0361904	0.713571	1
ENSG00000140443	IGF1R	IGF1R_HUMAN	P08069	A_23_P205986	-0.226462	8.73182	-2.28782	0.036217	0.713571	1
ENSG00000156711	MAPK13	MK13_HUMAN	O15264	A_23_P145376	0.187255	7.77516	2.28777	0.0362209	0.713571	1
ENSG00000169967	MAP3K2	M3K2_HUMAN	Q9Y2U5	A_23_P313645	-0.144527	8.26971	-2.28774	0.0362229	0.713571	1
ENSG00000089127	OAS1	OAS1_HUMAN	P00973	A_23_P64828	-0.160434	6.97221	-2.28693	0.03628	0.713606	1
ENSG00000155506	LARP1	LARP1_HUMAN	Q6PKG0	A_23_P392383	-0.151926	9.79489	-2.28647	0.0363131	0.713606	1
ENSG00000244515	-	-	-	A_24_P186746	-0.20955	13.7528	-2.28623	0.0363299	0.713606	1
ENSG00000115840	SLC25A12	CMC1_HUMAN	O75746	A_23_P142714	0.163912	8.28303	2.28622	0.0363305	0.713606	1
ENSG00000147394	ZNF185	ZN185_HUMAN	O15231	A_23_P11025	0.187686	9.83972	2.28576	0.0363634	0.713606	1
ENSG00000147862	NFIB	NFIB_HUMAN	O00712	A_24_P658427	0.197013	7.47368	2.28563	0.036373	0.713606	1
[truncated: 39,379 more rows]
