# Supplementary material for: Collagen Type I Improves the Differentiation of Human Embryonic Stem Cells towards Definitive Endoderm
Source: PLoS One. 2015 Dec 29;10(12):e0145389. doi: 10.1371/journal.pone.0145389 (PMC4694921; doi:10.1371/journal.pone.0145389)
Supplement: S9 Table — Gene expression in cell on Ne compared to the gene expression in cells on Fn. (XLSX) [file pone.0145389.s013.xlsx]

## Sheet: Ark1
Ne vs Fn
Ensembl_gene_ID	Gene_name	UniProt_ID	UniProt_accession	Probe_ID	log2 Fold Change	Average Expression	t statistic	p-Value	BH-adusted p-Value	Bonferroni corrected p-value
ENSG00000168234	TTC39C	TT39C_HUMAN	Q8N584	A_32_P155052	-0.695911	8.98028	-6.0953	1.60244e-05	0.365745	0.65849
ENSG00000092421	SEMA6A	SEM6A_HUMAN	Q9H2E6	A_23_P312840	-0.844628	10.3593	-5.67562	3.54947e-05	0.365745	1
ENSG00000162909	CAPN2	CAN2_HUMAN	P17655	A_23_P23924	0.421559	13.4431	5.5051	4.93623e-05	0.365745	1
ENSG00000185808	PIGP	PIGP_HUMAN	P57054	A_23_P143484	0.439227	10.5712	5.42175	5.80767e-05	0.365745	1
ENSG00000038427	VCAN	CSPG2_HUMAN	P13611	A_23_P144959	-0.673972	10.4303	-5.33495	6.88559e-05	0.365745	1
ENSG00000112159	MDN1	MDN1_HUMAN	Q9NU22	A_23_P365060	-0.508275	9.00848	-5.26942	7.8349e-05	0.365745	1
ENSG00000131094	C1QL1	C1QRF_HUMAN	O75973	A_23_P77993	-0.48822	8.02437	-5.16735	9.5908e-05	0.365745	1
ENSG00000105323	HNRNPUL1	HNRL1_HUMAN	Q9BUJ2	A_24_P108351	-0.446444	10.3025	-4.97293	0.00014146	0.365745	1
ENSG00000168234	TTC39C	TT39C_HUMAN	Q8N584	A_23_P308305	-0.752961	10.0517	-4.97199	0.000141726	0.365745	1
ENSG00000071575	TRIB2	TRIB2_HUMAN	Q92519	A_24_P396753	-0.423979	7.62551	-4.88985	0.000167236	0.365745	1
ENSG00000102921	N4BP1	N4BP1_HUMAN	O75113	A_23_P66085	-0.337711	8.43601	-4.87009	0.000174046	0.365745	1
ENSG00000178163	ZNF518B	Z518B_HUMAN	Q9C0D4	A_32_P144421	0.412537	10.2297	4.84271	0.000183961	0.365745	1
ENSG00000150627	WDR17	WDR17_HUMAN	Q8IZU2	A_24_P91985	-0.43802	6.89574	-4.8157	0.000194308	0.365745	1
ENSG00000156587	UBE2L6	UB2L6_HUMAN	O14933	A_23_P75741	-0.385398	8.9968	-4.79454	0.000202831	0.365745	1
ENSG00000102931	ARL2BP	AR2BP_HUMAN	Q9Y2Y0	A_23_P15182	0.37044	10.7396	4.76765	0.000214215	0.365745	1
ENSG00000135547	HEY2	HEY2_HUMAN	Q9UBP5	A_23_P168351	-0.441911	7.31061	-4.76258	0.000216434	0.365745	1
ENSG00000280409	-	-	-	A_23_P16708	0.418717	7.07889	4.72383	0.000234191	0.365745	1
ENSG00000151475	SLC25A31	ADT4_HUMAN	Q9H0C2	A_23_P18755	-0.379424	7.02293	-4.71492	0.000238485	0.365745	1
ENSG00000154153	FAM134B	F134B_HUMAN	Q9H6L5	A_23_P167599	0.388214	9.38208	4.67832	0.000256971	0.365745	1
ENSG00000173473	SMARCC1	SMRC1_HUMAN	Q92922	A_23_P83453	-0.331163	11.9775	-4.64227	0.000276614	0.365745	1
ENSG00000254706	-	-	-	A_24_P925737	-0.341862	7.03293	-4.63558	0.000280426	0.365745	1
ENSG00000239887	C1orf226	CA226_HUMAN	A1L170	A_24_P925737	-0.341862	7.03293	-4.63558	0.000280426	0.365745	1
ENSG00000008277	ADAM22	ADA22_HUMAN	Q9P0K1	A_24_P929899	0.411054	7.01486	4.58132	0.000313392	0.365745	1
ENSG00000182566	CLEC4G	CLC4G_HUMAN	Q6UXB4	A_23_P153390	-0.343383	7.36935	-4.56293	0.000325449	0.365745	1
ENSG00000053438	NNAT	NNAT_HUMAN	Q16517	A_24_P382533	-0.421181	10.8628	-4.54813	0.000335488	0.365745	1
ENSG00000102753	KPNA3	IMA4_HUMAN	O00505	A_23_P139950	-0.32776	9.46546	-4.54685	0.000336371	0.365745	1
ENSG00000099250	NRP1	NRP1_HUMAN	O14786	A_24_P928052	0.382268	8.28376	4.53828	0.00034235	0.365745	1
ENSG00000103061	SLC7A6OS	S7A6O_HUMAN	Q96CW6	A_23_P3562	0.368587	10.7693	4.53313	0.000345992	0.365745	1
ENSG00000269378	-	-	-	A_23_P104193	-0.445755	12.3064	-4.52231	0.000353771	0.365745	1
ENSG00000150093	ITGB1	ITB1_HUMAN	P05556	A_23_P104193	-0.445755	12.3064	-4.52231	0.000353771	0.365745	1
ENSG00000111913	FAM65B	FA65B_HUMAN	Q9Y4F9	A_23_P215009	-0.338657	8.22138	-4.52013	0.000355365	0.365745	1
ENSG00000269021	-	-	-	A_24_P600374	-0.325611	7.02676	-4.5167	0.000357879	0.365745	1
ENSG00000268318	-	-	-	A_24_P600374	-0.325611	7.02676	-4.5167	0.000357879	0.365745	1
ENSG00000120616	EPC1	EPC1_HUMAN	Q9H2F5	A_24_P252718	0.357523	9.91847	4.51555	0.00035873	0.365745	1
ENSG00000138698	RAP1GDS1	GDS1_HUMAN	P52306	A_32_P85813	0.375145	10.2741	4.49205	0.000376505	0.365745	1
ENSG00000179761	PIPOX	SOX_HUMAN	Q9P0Z9	A_23_P164258	-0.410353	8.33567	-4.47509	0.000389892	0.365745	1
ENSG00000278626	-	-	-	A_32_P116957	-0.395483	7.04648	-4.46255	0.000400103	0.365745	1
ENSG00000138119	MYOF	MYOF_HUMAN	Q9NZM1	A_23_P354387	0.482	11.135	4.44322	0.000416373	0.365745	1
ENSG00000188735	TMEM120B	T120B_HUMAN	A0PK00	A_24_P119131	0.322982	8.78247	4.43792	0.000420953	0.365745	1
ENSG00000134049	IER3IP1	IR3IP_HUMAN	Q9Y5U9	A_32_P429872	0.365278	10.9239	4.41698	0.000439553	0.365745	1
ENSG00000267228	IER3IP1	IR3IP_HUMAN	Q9Y5U9	A_32_P429872	0.365278	10.9239	4.41698	0.000439553	0.365745	1
ENSG00000128285	MCHR1	MCHR1_HUMAN	Q99705	A_23_P211543	-0.30542	7.22462	-4.41303	0.000443153	0.365745	1
ENSG00000103888	CEMIP	CEMIP_HUMAN	Q8WUJ3	A_23_P324754	-0.333592	7.26903	-4.36235	0.000492122	0.365745	1
ENSG00000179397	C1orf101	CA101_HUMAN	Q5SY80	A_32_P228067	0.38073	7.11651	4.34957	0.000505328	0.365745	1
ENSG00000168234	TTC39C	TT39C_HUMAN	Q8N584	A_23_P401098	-0.387295	8.69076	-4.34897	0.000505955	0.365745	1
ENSG00000184697	CLDN6	CLD6_HUMAN	P56747	A_23_P37942	-0.44761	13.4701	-4.3452	0.00050992	0.365745	1
ENSG00000130167	TSPAN16	TSN16_HUMAN	Q9UKR8	A_23_P142070	0.380819	6.97572	4.33275	0.00052324	0.365745	1
ENSG00000254321	-	-	-	A_32_P59693	-0.385991	7.05095	-4.30382	0.00055559	0.365745	1
ENSG00000178035	IMPDH2	IMDH2_HUMAN	P12268	A_24_P166042	-0.337631	10.8262	-4.28759	0.000574629	0.365745	1
ENSG00000119899	SLC17A5	S17A5_HUMAN	Q9NRA2	A_23_P110896	-0.343656	8.17425	-4.28558	0.000577026	0.365745	1
ENSG00000218336	TENM3	TEN3_HUMAN	Q9P273	A_24_P911420	-0.293965	9.27463	-4.28208	0.000581236	0.365745	1
ENSG00000184408	KCND2	KCND2_HUMAN	Q9NZV8	A_23_P112564	-0.320829	7.38342	-4.27703	0.000587372	0.365745	1
ENSG00000149575	SCN2B	SCN2B_HUMAN	O60939	A_32_P187571	0.317114	7.00556	4.26292	0.000604836	0.365745	1
ENSG00000004948	CALCR	CALCR_HUMAN	P30988	A_23_P134484	0.390388	11.1306	4.25894	0.000609861	0.365745	1
ENSG00000219608	-	-	-	A_23_P120644	0.384459	13.3147	4.25666	0.000612758	0.365745	1
ENSG00000134709	HOOK1	HOOK1_HUMAN	Q9UJC3	A_23_P114879	-0.379095	8.60768	-4.25619	0.000613349	0.365745	1
ENSG00000183688	FAM101B	F101B_HUMAN	Q8N5W9	A_24_P32151	-0.524901	8.75424	-4.24311	0.000630259	0.365745	1
ENSG00000254087	LYN	LYN_HUMAN	P07948	A_23_P147431	-0.433604	10.07	-4.23713	0.000638152	0.365745	1
ENSG00000182866	LCK	LCK_HUMAN	P06239	A_23_P103361	-0.632233	8.9802	-4.2347	0.000641375	0.365745	1
ENSG00000196418	ZNF124	ZN124_HUMAN	Q15973	A_32_P875758	0.430459	9.67811	4.20737	0.000678906	0.365745	1
ENSG00000254281	-	-	-	A_32_P165504	-0.374761	7.24453	-4.20647	0.000680181	0.365745	1
ENSG00000162949	CAPN13	CAN13_HUMAN	Q6MZZ7	A_24_P336983	0.381606	10.0469	4.2	0.000689407	0.365745	1
ENSG00000124575	HIST1H1D	H13_HUMAN	P16402	A_24_P260639	-0.461586	12.1699	-4.19183	0.000701244	0.365745	1
ENSG00000156026	MCU	MCU_HUMAN	Q8NE86	A_23_P346405	-0.311066	8.94078	-4.19034	0.000703419	0.365745	1
ENSG00000160882	CYP11B1	C11B1_HUMAN	P15538	A_24_P329424	0.405112	6.94922	4.19001	0.000703905	0.365745	1
ENSG00000198216	CACNA1E	CAC1E_HUMAN	Q15878	A_24_P911621	-0.388079	6.98722	-4.14818	0.000768026	0.365745	1
ENSG00000163531	NFASC	NFASC_HUMAN	O94856	A_24_P350656	0.309232	10.6873	4.13971	0.000781712	0.365745	1
ENSG00000233369	-	-	-	A_24_P95007	-0.306201	11.9436	-4.12274	0.000809898	0.365745	1
ENSG00000277053	-	-	-	A_24_P95007	-0.306201	11.9436	-4.12274	0.000809898	0.365745	1
ENSG00000263001	GTF2I	GTF2I_HUMAN	P78347	A_24_P95007	-0.306201	11.9436	-4.12274	0.000809898	0.365745	1
ENSG00000071967	CYBRD1	CYBR1_HUMAN	Q53TN4	A_24_P345451	-0.313072	8.11722	-4.11965	0.000815127	0.365745	1
ENSG00000189067	LITAF	LITAF_HUMAN	Q99732	A_23_P3532	-0.384873	9.88247	-4.11445	0.000824028	0.365745	1
ENSG00000166974	MAPRE2	MARE2_HUMAN	Q15555	A_24_P193911	0.342663	7.12688	4.1126	0.000827225	0.365745	1
ENSG00000145757	SPATA9	SPAT9_HUMAN	Q9BWV2	A_23_P390576	-0.357931	7.01011	-4.11224	0.000827834	0.365745	1
ENSG00000269404	SPIB	SPIB_HUMAN	Q01892	A_23_P39067	-0.663618	9.59296	-4.11189	0.000828447	0.365745	1
ENSG00000120937	NPPB	ANFB_HUMAN	P16860	A_23_P62752	0.516324	16.2718	4.10619	0.000838359	0.365745	1
ENSG00000130768	SMPDL3B	ASM3B_HUMAN	Q92485	A_23_P160881	-0.634744	9.94204	-4.0997	0.000849795	0.365745	1
ENSG00000134324	LPIN1	LPIN1_HUMAN	Q14693	A_32_P52609	0.374333	10.2636	4.09665	0.00085524	0.365745	1
ENSG00000135541	AHI1	AHI1_HUMAN	Q8N157	A_23_P70746	-0.288635	8.18549	-4.09297	0.000861842	0.365745	1
ENSG00000211807	TRAV26-1	-	-	A_23_P44857	-0.300831	6.97317	-4.09046	0.00086636	0.365745	1
ENSG00000144810	COL8A1	CO8A1_HUMAN	P27658	A_24_P139152	0.5536	9.35487	4.09009	0.000867035	0.365745	1
ENSG00000128408	RIBC2	RIBC2_HUMAN	Q9H4K1	A_23_P166526	0.346316	8.13513	4.08982	0.000867522	0.365745	1
ENSG00000163377	FAM19A4	F19A4_HUMAN	Q96LR4	A_32_P71571	-0.325752	7.25688	-4.0818	0.000882181	0.365745	1
ENSG00000104112	SCG3	SCG3_HUMAN	Q8WXD2	A_24_P210569	-0.422279	8.28623	-4.08151	0.000882723	0.365745	1
ENSG00000135324	MRAP2	MRAP2_HUMAN	Q96G30	A_23_P357207	0.379199	10.0603	4.06014	0.00092304	0.365745	1
ENSG00000261838	-	-	-	A_32_P162820	-0.305297	7.01372	-4.05543	0.00093218	0.365745	1
ENSG00000235321	-	-	-	A_32_P63113	-0.34444	6.9613	-4.05027	0.000942293	0.365745	1
ENSG00000164935	DCSTAMP	DCSTP_HUMAN	Q9H295	A_23_P43107	0.308639	7.06638	4.04861	0.000945566	0.365745	1
ENSG00000164161	HHIP	HHIP_HUMAN	Q96QV1	A_23_P167129	0.292723	7.14846	4.04476	0.000953213	0.365745	1
ENSG00000126803	HSPA2	HSP72_HUMAN	P54652	A_23_P88303	-0.777763	10.3178	-4.04329	0.000956144	0.365745	1
ENSG00000176771	NCKAP5	NCKP5_HUMAN	O14513	A_23_P360079	0.489195	7.21529	4.04242	0.000957878	0.365745	1
ENSG00000084628	NKAIN1	NKAI1_HUMAN	Q4KMZ8	A_23_P51376	-0.516305	10.7224	-4.04087	0.000961002	0.365745	1
ENSG00000090621	PABPC4	PABP4_HUMAN	Q13310	A_23_P51718	-0.360984	9.04103	-4.03695	0.000968911	0.365745	1
ENSG00000167459	-	-	-	A_24_P14403	-0.320996	6.96606	-4.03418	0.000974544	0.365745	1
ENSG00000184995	IFNE	IFNE_HUMAN	Q86WN2	A_23_P302060	0.267377	7.17543	4.03015	0.000982795	0.365745	1
ENSG00000183199	-	-	-	A_32_P147505	-0.348015	12.453	-4.02795	0.000987323	0.365745	1
ENSG00000092421	SEMA6A	SEM6A_HUMAN	Q9H2E6	A_24_P213478	-0.49371	9.33891	-4.02226	0.000999154	0.365745	1
ENSG00000004487	KDM1A	KDM1A_HUMAN	O60341	A_24_P74981	-0.495823	10.3277	-4.01655	0.00101117	0.365745	1
ENSG00000106631	MYL7	MLRA_HUMAN	Q01449	A_23_P59738	0.412725	14.5666	4.00711	0.00103135	0.365745	1
ENSG00000203724	C1orf53	CA053_HUMAN	Q5VUE5	A_32_P210572	0.301648	9.0945	4.00488	0.00103617	0.365745	1
ENSG00000201659	-	-	-	A_24_P23445	0.386934	7.23744	4.0011	0.0010444	0.365745	1
ENSG00000177947	ODF3	ODF3A_HUMAN	Q96PU9	A_24_P4736	-0.330673	6.99156	-3.9987	0.00104968	0.365745	1
ENSG00000228486	-	-	-	A_24_P456723	0.321784	8.60088	3.99577	0.00105612	0.365745	1
ENSG00000121316	PLBD1	PLBL1_HUMAN	Q6P4A8	A_23_P87709	-0.398911	10.1903	-3.99096	0.00106681	0.365745	1
ENSG00000148444	COMMD3	COMD3_HUMAN	Q9UBI1	A_23_P138514	0.392771	11.3776	3.98209	0.00108683	0.365745	1
ENSG00000254788	CKLF	-	-	A_23_P206396	0.365893	11.3809	3.9813	0.00108863	0.365745	1
ENSG00000254788	CKLF-CMTM1	-	-	A_23_P206396	0.365893	11.3809	3.9813	0.00108863	0.365745	1
ENSG00000217555	CKLF	-	-	A_23_P206396	0.365893	11.3809	3.9813	0.00108863	0.365745	1
ENSG00000182533	CAV3	CAV3_HUMAN	P56539	A_24_P319989	-0.373119	6.81462	-3.98099	0.00108935	0.365745	1
ENSG00000088340	-	-	-	A_24_P23454	0.341361	7.02564	3.97951	0.00109271	0.365745	1
ENSG00000278931	-	-	-	A_32_P13151	0.341555	6.93556	3.9765	0.00109963	0.365745	1
ENSG00000087245	MMP2	MMP2_HUMAN	P08253	A_23_P163787	-0.290126	8.46471	-3.97084	0.00111275	0.365745	1
ENSG00000188803	SHISA6	SHSA6_HUMAN	Q6ZSJ9	A_23_P411542	0.463285	9.66408	3.96388	0.0011291	0.365745	1
ENSG00000055950	MRPL43	RM43_HUMAN	Q8N983	A_23_P382154	0.293379	8.63753	3.96238	0.00113264	0.365745	1
ENSG00000198700	IPO9	IPO9_HUMAN	Q96P70	A_23_P97157	-0.281609	10.0063	-3.95276	0.00115571	0.365745	1
ENSG00000196811	CHRNG	ACHG_HUMAN	P07510	A_23_P5718	0.38531	6.8947	3.95232	0.0011568	0.365745	1
ENSG00000150093	ITGB1	ITB1_HUMAN	P05556	A_23_P104199	-0.378602	10.3457	-3.9469	0.00117001	0.365745	1
ENSG00000163646	CLRN1	CLRN1_HUMAN	P58418	A_23_P328709	0.36033	6.95893	3.94433	0.00117632	0.365745	1
ENSG00000228594	C1orf233	CA233_HUMAN	F2Z333	A_24_P731549	-0.303368	10.3712	-3.9441	0.00117689	0.365745	1
ENSG00000133135	RNF128	RN128_HUMAN	Q8TEB7	A_24_P340036	0.345545	7.03645	3.94337	0.0011787	0.365745	1
ENSG00000135220	UGT2A3	UD2A3_HUMAN	Q6UWM9	A_24_P334378	0.387296	6.90282	3.94332	0.00117881	0.365745	1
ENSG00000250612	-	-	-	A_24_P334378	0.387296	6.90282	3.94332	0.00117881	0.365745	1
ENSG00000185664	PMEL	PMEL_HUMAN	P40967	A_23_P312851	-0.562566	9.98157	-3.93957	0.00118813	0.365745	1
ENSG00000139364	TMEM132B	T132B_HUMAN	Q14DG7	A_24_P6626	-0.318747	7.45857	-3.93776	0.00119266	0.365745	1
ENSG00000168234	TTC39C	TT39C_HUMAN	Q8N584	A_32_P123629	-0.505413	11.1581	-3.91902	0.00124045	0.370662	1
ENSG00000172403	SYNPO2	SYNP2_HUMAN	Q9UMS6	A_24_P119665	0.563368	7.07886	3.91774	0.00124379	0.370662	1
ENSG00000171467	ZNF318	ZN318_HUMAN	Q5VUA4	A_24_P204043	-0.282322	7.54577	-3.91617	0.0012479	0.370662	1
ENSG00000181449	SOX2	SOX2_HUMAN	P48431	A_24_P379969	-0.633651	11.7679	-3.91288	0.00125652	0.370662	1
ENSG00000105655	ISYNA1	INO1_HUMAN	Q9NPH2	A_23_P5131	-0.359738	12.007	-3.91116	0.00126108	0.370662	1
ENSG00000132669	RIN2	RIN2_HUMAN	Q8WYP3	A_24_P305570	0.311669	8.41543	3.9105	0.00126281	0.370662	1
ENSG00000215859	-	-	-	A_23_P52121	0.418468	11.0149	3.90519	0.00127696	0.372158	1
ENSG00000244211	-	-	-	A_23_P52121	0.418468	11.0149	3.90519	0.00127696	0.372158	1
ENSG00000174827	PDZK1	NHRF3_HUMAN	Q5T2W1	A_23_P52121	0.418468	11.0149	3.90519	0.00127696	0.372158	1
ENSG00000279867	-	-	-	A_32_P401091	-0.342529	6.95937	-3.89755	0.0012976	0.374684	1
ENSG00000279787	CDY1	CDY1_HUMAN	Q9Y6F8	A_32_P401091	-0.342529	6.95937	-3.89755	0.0012976	0.374684	1
ENSG00000279787	CDY1B	CDY1_HUMAN	Q9Y6F8	A_32_P401091	-0.342529	6.95937	-3.89755	0.0012976	0.374684	1
ENSG00000172352	CDY1	CDY1_HUMAN	Q9Y6F8	A_32_P401091	-0.342529	6.95937	-3.89755	0.0012976	0.374684	1
ENSG00000172352	CDY1B	CDY1_HUMAN	Q9Y6F8	A_32_P401091	-0.342529	6.95937	-3.89755	0.0012976	0.374684	1
ENSG00000172288	CDY1	CDY1_HUMAN	Q9Y6F8	A_32_P401091	-0.342529	6.95937	-3.89755	0.0012976	0.374684	1
ENSG00000172288	CDY1B	CDY1_HUMAN	Q9Y6F8	A_32_P401091	-0.342529	6.95937	-3.89755	0.0012976	0.374684	1
ENSG00000279820	CDY2A	CDY2_HUMAN	Q9Y6F7	A_32_P401091	-0.342529	6.95937	-3.89755	0.0012976	0.374684	1
ENSG00000279820	CDY2B	CDY2_HUMAN	Q9Y6F7	A_32_P401091	-0.342529	6.95937	-3.89755	0.0012976	0.374684	1
ENSG00000279736	-	-	-	A_32_P401091	-0.342529	6.95937	-3.89755	0.0012976	0.374684	1
ENSG00000279150	CDY1	CDY1_HUMAN	Q9Y6F8	A_32_P401091	-0.342529	6.95937	-3.89755	0.0012976	0.374684	1
ENSG00000279150	CDY1B	CDY1_HUMAN	Q9Y6F8	A_32_P401091	-0.342529	6.95937	-3.89755	0.0012976	0.374684	1
ENSG00000280290	CDY2A	CDY2_HUMAN	Q9Y6F7	A_32_P401091	-0.342529	6.95937	-3.89755	0.0012976	0.374684	1
ENSG00000280290	CDY2B	CDY2_HUMAN	Q9Y6F7	A_32_P401091	-0.342529	6.95937	-3.89755	0.0012976	0.374684	1
ENSG00000129873	CDY2A	CDY2_HUMAN	Q9Y6F7	A_32_P401091	-0.342529	6.95937	-3.89755	0.0012976	0.374684	1
ENSG00000129873	CDY2B	CDY2_HUMAN	Q9Y6F7	A_32_P401091	-0.342529	6.95937	-3.89755	0.0012976	0.374684	1
ENSG00000182415	CDY2A	CDY2_HUMAN	Q9Y6F7	A_32_P401091	-0.342529	6.95937	-3.89755	0.0012976	0.374684	1
ENSG00000182415	CDY2B	CDY2_HUMAN	Q9Y6F7	A_32_P401091	-0.342529	6.95937	-3.89755	0.0012976	0.374684	1
ENSG00000178199	ZC3H12D	ZC12D_HUMAN	A2A288	A_24_P187826	0.355468	6.97528	3.89526	0.00130387	0.374684	1
ENSG00000145423	SFRP2	SFRP2_HUMAN	Q96HF1	A_24_P934546	-0.683212	11.0318	-3.88001	0.00134627	0.376853	1
ENSG00000042832	TG	THYG_HUMAN	P01266	A_23_P32454	-0.300917	7.1189	-3.87631	0.00135675	0.376853	1
ENSG00000074370	ATP2A3	AT2A3_HUMAN	Q93084	A_23_P207632	-0.359003	7.77931	-3.87532	0.00135959	0.376853	1
ENSG00000164808	SPIDR	SPIDR_HUMAN	Q14159	A_24_P143686	-0.295044	8.55857	-3.87494	0.00136067	0.376853	1
ENSG00000233867	-	-	-	A_24_P657226	-0.305132	6.96991	-3.86936	0.00137669	0.376853	1
ENSG00000273173	SNURF	SNURF_HUMAN	Q9Y675	A_23_P77066	-0.345978	13.0523	-3.8688	0.00137832	0.376853	1
ENSG00000128739	SNRPN	RSMN_HUMAN	P63162	A_23_P77066	-0.345978	13.0523	-3.8688	0.00137832	0.376853	1
ENSG00000138111	TMEM180	TM180_HUMAN	Q14CX5	A_23_P337729	-0.44779	9.67102	-3.86874	0.0013785	0.376853	1
ENSG00000102871	TRADD	TRADD_HUMAN	Q15628	A_23_P54649	0.394134	10.6856	3.86228	0.00139732	0.376853	1
ENSG00000180999	C1orf105	CA105_HUMAN	O95561	A_23_P46584	0.324873	7.10413	3.85111	0.00143047	0.376853	1
ENSG00000007062	PROM1	PROM1_HUMAN	O43490	A_23_P258463	-0.454177	8.93989	-3.84959	0.00143507	0.376853	1
ENSG00000204531	POU5F1	PO5F1_HUMAN	Q01860	A_32_P132563	-0.595736	13.8554	-3.84549	0.00144747	0.376853	1
ENSG00000206454	POU5F1	PO5F1_HUMAN	Q01860	A_32_P132563	-0.595736	13.8554	-3.84549	0.00144747	0.376853	1
ENSG00000235068	POU5F1	PO5F1_HUMAN	Q01860	A_32_P132563	-0.595736	13.8554	-3.84549	0.00144747	0.376853	1
ENSG00000235602	-	-	-	A_32_P132563	-0.595736	13.8554	-3.84549	0.00144747	0.376853	1
ENSG00000229094	POU5F1	PO5F1_HUMAN	Q01860	A_32_P132563	-0.595736	13.8554	-3.84549	0.00144747	0.376853	1
ENSG00000237582	POU5F1	PO5F1_HUMAN	Q01860	A_32_P132563	-0.595736	13.8554	-3.84549	0.00144747	0.376853	1
ENSG00000233911	POU5F1	PO5F1_HUMAN	Q01860	A_32_P132563	-0.595736	13.8554	-3.84549	0.00144747	0.376853	1
ENSG00000237872	-	-	-	A_32_P132563	-0.595736	13.8554	-3.84549	0.00144747	0.376853	1
ENSG00000230336	POU5F1	PO5F1_HUMAN	Q01860	A_32_P132563	-0.595736	13.8554	-3.84549	0.00144747	0.376853	1
ENSG00000241476	SSX2	SSX2_HUMAN	Q16385	A_23_P33881	0.470505	11.2994	3.84437	0.00145087	0.376853	1
ENSG00000241476	SSX2B	SSX2_HUMAN	Q16385	A_23_P33881	0.470505	11.2994	3.84437	0.00145087	0.376853	1
ENSG00000268447	SSX2	SSX2_HUMAN	Q16385	A_23_P33881	0.470505	11.2994	3.84437	0.00145087	0.376853	1
ENSG00000268447	SSX2B	SSX2_HUMAN	Q16385	A_23_P33881	0.470505	11.2994	3.84437	0.00145087	0.376853	1
ENSG00000227302	-	-	-	A_23_P33881	0.470505	11.2994	3.84437	0.00145087	0.376853	1
ENSG00000171483	SSX6	SSX6_HUMAN	Q7RTT6	A_23_P33881	0.470505	11.2994	3.84437	0.00145087	0.376853	1
ENSG00000268009	SSX4	SSX4_HUMAN	O60224	A_23_P33881	0.470505	11.2994	3.84437	0.00145087	0.376853	1
ENSG00000268009	SSX4B	SSX4_HUMAN	O60224	A_23_P33881	0.470505	11.2994	3.84437	0.00145087	0.376853	1
ENSG00000269791	SSX4	SSX4_HUMAN	O60224	A_23_P33881	0.470505	11.2994	3.84437	0.00145087	0.376853	1
ENSG00000269791	SSX4B	SSX4_HUMAN	O60224	A_23_P33881	0.470505	11.2994	3.84437	0.00145087	0.376853	1
ENSG00000176393	RNPEP	AMPB_HUMAN	Q9H4A4	A_24_P68649	-0.336739	7.89758	-3.84351	0.00145349	0.376853	1
ENSG00000104312	RIPK2	RIPK2_HUMAN	O43353	A_23_P252106	0.364528	12.4158	3.84317	0.00145455	0.376853	1
ENSG00000096384	HSP90AB1	HS90B_HUMAN	P08238	A_23_P145089	-0.2867	14.2786	-3.83981	0.00146483	0.376853	1
ENSG00000183199	-	-	-	A_23_P145089	-0.2867	14.2786	-3.83981	0.00146483	0.376853	1
ENSG00000174871	CNIH2	CNIH2_HUMAN	Q6PI25	A_24_P203315	-0.328658	7.46921	-3.83757	0.00147174	0.376853	1
ENSG00000135632	SMYD5	SMYD5_HUMAN	Q6GMV2	A_23_P91015	-0.31151	9.94245	-3.83551	0.00147813	0.376853	1
ENSG00000119335	SET	SET_HUMAN	Q01105	A_23_P217015	-0.308142	11.0833	-3.82916	0.00149799	0.376853	1
ENSG00000163530	DPPA2	DPPA2_HUMAN	Q7Z7J5	A_23_P405885	-0.470833	9.27672	-3.82851	0.00150004	0.376853	1
ENSG00000147601	TERF1	TERF1_HUMAN	P54274	A_23_P216149	-0.431197	13.7612	-3.81556	0.00154141	0.376853	1
ENSG00000173231	-	-	-	A_23_P216149	-0.431197	13.7612	-3.81556	0.00154141	0.376853	1
ENSG00000187589	-	-	-	A_23_P216149	-0.431197	13.7612	-3.81556	0.00154141	0.376853	1
ENSG00000167600	CYP2S1	CP2S1_HUMAN	Q96SQ9	A_23_P101374	-0.598431	10.6337	-3.81384	0.00154697	0.376853	1
ENSG00000140263	SORD	DHSO_HUMAN	Q00796	A_23_P77103	-0.465352	10.2046	-3.81215	0.0015525	0.376853	1
ENSG00000259479	-	-	-	A_23_P77103	-0.465352	10.2046	-3.81215	0.0015525	0.376853	1
ENSG00000135870	RC3H1	RC3H1_HUMAN	Q5TC82	A_32_P96807	0.33734	11.3015	3.80549	0.00157438	0.376853	1
ENSG00000123143	PKN1	PKN1_HUMAN	Q16512	A_23_P67271	-0.343487	10.0228	-3.80134	0.00158818	0.376853	1
ENSG00000159840	ZYX	ZYX_HUMAN	Q15942	A_23_P254888	-0.348733	12.6702	-3.79892	0.00159627	0.376853	1
ENSG00000180481	GLIPR1L2	GRPL2_HUMAN	Q4G1C9	A_24_P381499	-0.332769	6.91668	-3.79514	0.001609	0.376853	1
ENSG00000156304	SCAF4	SFR15_HUMAN	O95104	A_23_P6223	-0.38513	9.23828	-3.79367	0.00161396	0.376853	1
ENSG00000103671	TRIP4	TRIP4_HUMAN	Q15650	A_23_P152028	0.273053	11.2111	3.78991	0.00162677	0.376853	1
ENSG00000162493	PDPN	PDPN_HUMAN	Q86YL7	A_24_P299685	-0.428385	10.9568	-3.78822	0.00163258	0.376853	1
ENSG00000119139	TJP2	ZO2_HUMAN	Q9UDY2	A_24_P201153	-0.300842	7.93166	-3.78217	0.00165348	0.376853	1
ENSG00000238045	-	-	-	A_24_P901986	0.469681	7.03917	3.78159	0.00165548	0.376853	1
ENSG00000188859	FAM78B	FA78B_HUMAN	Q5VT40	A_23_P307682	0.341579	7.98465	3.77443	0.00168059	0.376853	1
ENSG00000141480	ARRB2	ARRB2_HUMAN	P32121	A_23_P158829	-0.295536	11.2273	-3.76684	0.00170763	0.376853	1
ENSG00000141480	DKFZp686L0365	ARRB2_HUMAN	P32121	A_23_P158829	-0.295536	11.2273	-3.76684	0.00170763	0.376853	1
ENSG00000136110	LECT1	LECT1_HUMAN	O75829	A_23_P25587	-0.458877	9.02834	-3.76635	0.00170939	0.376853	1
ENSG00000116670	MAD2L2	MD2L2_HUMAN	Q9UI95	A_23_P23206	-0.337305	12.0664	-3.75953	0.00173407	0.376853	1
ENSG00000182162	P2RY8	P2RY8_HUMAN	Q86VZ1	A_24_P340128	0.33374	7.00031	3.75777	0.00174049	0.376853	1
ENSG00000171160	MORN4	MORN4_HUMAN	Q8NDC4	A_24_P230938	0.276984	8.82946	3.74867	0.00177413	0.376853	1
ENSG00000176566	DCAF4L2	DC4L2_HUMAN	Q8NA75	A_23_P364619	0.29998	7.00025	3.74624	0.00178321	0.376853	1
ENSG00000136436	CALCOCO2	CACO2_HUMAN	Q13137	A_24_P322191	0.390438	8.07398	3.74235	0.00179789	0.376853	1
ENSG00000254573	-	-	-	A_32_P210902	-0.407459	6.99438	-3.74176	0.00180012	0.376853	1
ENSG00000230356	-	-	-	A_24_P638453	-0.346568	8.97039	-3.7371	0.00181784	0.376853	1
ENSG00000053254	FOXN3	FOXN3_HUMAN	O00409	A_23_P88435	-0.489289	9.56426	-3.7318	0.00183822	0.376853	1
ENSG00000106333	PCOLCE	PCOC1_HUMAN	Q15113	A_23_P251499	-0.287549	9.44859	-3.72796	0.00185312	0.376853	1
ENSG00000131370	SH3BP5	3BP5_HUMAN	O60239	A_23_P143964	0.362414	10.5762	3.72542	0.00186304	0.376853	1
ENSG00000165078	CPA6	CBPA6_HUMAN	Q8N4T0	A_24_P4170	-0.285073	6.99551	-3.72532	0.00186345	0.376853	1
ENSG00000137309	HMGA1	HMGA1_HUMAN	P17096	A_23_P42331	-0.280765	15.2086	-3.72522	0.00186385	0.376853	1
ENSG00000233440	-	-	-	A_23_P42331	-0.280765	15.2086	-3.72522	0.00186385	0.376853	1
ENSG00000263639	MSMB	MSMB_HUMAN	P08118	A_23_P75024	0.290939	9.40013	3.72335	0.0018712	0.376853	1
ENSG00000204531	POU5F1	PO5F1_HUMAN	Q01860	A_24_P144601	-0.571417	14.0716	-3.72158	0.00187816	0.376853	1
ENSG00000206454	POU5F1	PO5F1_HUMAN	Q01860	A_24_P144601	-0.571417	14.0716	-3.72158	0.00187816	0.376853	1
ENSG00000235068	POU5F1	PO5F1_HUMAN	Q01860	A_24_P144601	-0.571417	14.0716	-3.72158	0.00187816	0.376853	1
ENSG00000212993	POU5F1B	P5F1B_HUMAN	Q06416	A_24_P144601	-0.571417	14.0716	-3.72158	0.00187816	0.376853	1
ENSG00000235602	-	-	-	A_24_P144601	-0.571417	14.0716	-3.72158	0.00187816	0.376853	1
ENSG00000229094	POU5F1	PO5F1_HUMAN	Q01860	A_24_P144601	-0.571417	14.0716	-3.72158	0.00187816	0.376853	1
ENSG00000237582	POU5F1	PO5F1_HUMAN	Q01860	A_24_P144601	-0.571417	14.0716	-3.72158	0.00187816	0.376853	1
ENSG00000233911	POU5F1	PO5F1_HUMAN	Q01860	A_24_P144601	-0.571417	14.0716	-3.72158	0.00187816	0.376853	1
ENSG00000230336	POU5F1	PO5F1_HUMAN	Q01860	A_24_P144601	-0.571417	14.0716	-3.72158	0.00187816	0.376853	1
ENSG00000203805	PPAPDC1A	PPC1A_HUMAN	Q5VZY2	A_24_P810290	0.372505	10.3812	3.71491	0.0019047	0.376853	1
ENSG00000067715	SYT1	SYT1_HUMAN	P21579	A_23_P36795	-0.528129	9.02928	-3.71303	0.00191226	0.376853	1
ENSG00000196581	AJAP1	AJAP1_HUMAN	Q9UKB5	A_23_P23155	0.345876	11.2321	3.7097	0.00192569	0.376853	1
ENSG00000258691	-	-	-	A_24_P919850	0.301369	7.74587	3.7078	0.00193339	0.376853	1
ENSG00000100739	BDKRB1	BKRB1_HUMAN	P46663	A_24_P919850	0.301369	7.74587	3.7078	0.00193339	0.376853	1
ENSG00000183690	EFHC2	EFHC2_HUMAN	Q5JST6	A_24_P147927	0.279827	7.26982	3.70032	0.00196408	0.376853	1
ENSG00000110092	CCND1	CCND1_HUMAN	P24385	A_24_P193011	-0.382882	8.58185	-3.69984	0.00196607	0.376853	1
ENSG00000141682	PMAIP1	APR_HUMAN	Q13794	A_23_P207999	-0.610618	11.6491	-3.69233	0.00199738	0.376853	1
ENSG00000171643	S100Z	S100Z_HUMAN	Q8WXG8	A_24_P12136	0.382171	10.3663	3.6919	0.00199916	0.376853	1
ENSG00000181652	ATG9B	ATG9B_HUMAN	Q674R7	A_32_P379379	-0.380139	7.13424	-3.68782	0.00201642	0.376853	1
ENSG00000268505	-	-	-	A_32_P157580	-0.349705	6.96237	-3.68743	0.00201809	0.376853	1
ENSG00000223814	-	-	-	A_23_P336859	0.366657	10.5867	3.68584	0.00202482	0.376853	1
ENSG00000269113	TRABD2B	TIKI2_HUMAN	A6NFA1	A_23_P336859	0.366657	10.5867	3.68584	0.00202482	0.376853	1
ENSG00000110092	CCND1	CCND1_HUMAN	P24385	A_23_P202837	-0.352726	8.97209	-3.68576	0.00202518	0.376853	1
ENSG00000269148	-	-	-	A_24_P393502	0.368389	6.88669	3.68499	0.00202845	0.376853	1
ENSG00000166033	HTRA1	HTRA1_HUMAN	Q92743	A_23_P97990	-0.497296	9.5539	-3.68274	0.00203807	0.376853	1
ENSG00000087008	ACOX3	ACOX3_HUMAN	O15254	A_24_P354451	0.290709	10.335	3.68202	0.00204119	0.376853	1
ENSG00000273729	-	-	-	A_32_P229358	0.322516	7.15244	3.68009	0.00204947	0.376853	1
ENSG00000156500	FAM122C	F222C_HUMAN	Q6P4D5	A_23_P340188	0.271218	8.6482	3.67741	0.00206105	0.376853	1
ENSG00000156500	RP3-473B4.1	F222C_HUMAN	Q6P4D5	A_23_P340188	0.271218	8.6482	3.67741	0.00206105	0.376853	1
ENSG00000109572	CLCN3	CLCN3_HUMAN	P51790	A_24_P114671	-0.302864	7.54361	-3.66915	0.0020972	0.376853	1
ENSG00000172478	C2orf54	CB054_HUMAN	Q08AI8	A_23_P60990	-0.328708	7.01699	-3.66259	0.00212635	0.376853	1
ENSG00000213023	SYT3	SYT3_HUMAN	Q9BQG1	A_23_P55917	-0.330289	9.39476	-3.6611	0.00213304	0.376853	1
ENSG00000267890	-	-	-	A_23_P55917	-0.330289	9.39476	-3.6611	0.00213304	0.376853	1
ENSG00000177575	CD163	C163A_HUMAN	Q86VB7	A_23_P33723	0.263796	8.17499	3.66038	0.0021363	0.376853	1
ENSG00000186479	RGS7BP	R7BP_HUMAN	Q6MZT1	A_23_P81233	-0.358575	7.02829	-3.65995	0.00213823	0.376853	1
ENSG00000267175	-	-	-	A_24_P685442	0.258283	7.01525	3.65932	0.00214104	0.376853	1
ENSG00000107815	PEO1	PEO1_HUMAN	Q96RR1	A_23_P138461	-0.307845	8.6029	-3.65745	0.00214949	0.376853	1
ENSG00000081913	PHLPP1	PHLP1_HUMAN	O60346	A_23_P89762	-0.416635	8.91345	-3.65638	0.00215434	0.376853	1
ENSG00000174607	UGT8	CGT_HUMAN	Q16880	A_24_P103264	-0.33784	7.8623	-3.65489	0.00216111	0.376853	1
ENSG00000254788	CKLF	-	-	A_23_P118061	0.366029	10.3023	3.65479	0.00216155	0.376853	1
ENSG00000254788	CKLF-CMTM1	-	-	A_23_P118061	0.366029	10.3023	3.65479	0.00216155	0.376853	1
ENSG00000217555	CKLF	-	-	A_23_P118061	0.366029	10.3023	3.65479	0.00216155	0.376853	1
ENSG00000174574	AKIRIN1	AKIR1_HUMAN	Q9H9L7	A_23_P256142	-0.333019	9.94393	-3.65431	0.00216375	0.376853	1
ENSG00000227057	WDR46	WDR46_HUMAN	O15213	A_24_P389038	-0.33855	9.50013	-3.65352	0.00216732	0.376853	1
ENSG00000170412	GPRC5C	GPC5C_HUMAN	Q9NQ84	A_23_P38167	0.394791	14.2306	3.65185	0.00217496	0.376853	1
ENSG00000166851	PLK1	PLK1_HUMAN	P53350	A_23_P118174	-0.328237	10.4266	-3.64779	0.00219364	0.376853	1
ENSG00000269713	NBPF9	-	-	A_32_P149492	0.260052	8.93894	3.6475	0.00219496	0.376853	1
ENSG00000268043	NBPF12	-	-	A_32_P149492	0.260052	8.93894	3.6475	0.00219496	0.376853	1
ENSG00000263956	NBPF11	NBPFB_HUMAN	Q86T75	A_32_P149492	0.260052	8.93894	3.6475	0.00219496	0.376853	1
ENSG00000162825	NBPF8	-	-	A_32_P149492	0.260052	8.93894	3.6475	0.00219496	0.376853	1
ENSG00000272150	-	-	-	A_32_P149492	0.260052	8.93894	3.6475	0.00219496	0.376853	1
ENSG00000266338	NBPF15	NBPFF_HUMAN	Q8N660	A_32_P149492	0.260052	8.93894	3.6475	0.00219496	0.376853	1
ENSG00000271383	NBPF14	-	-	A_32_P149492	0.260052	8.93894	3.6475	0.00219496	0.376853	1
ENSG00000273136	NBPF26	-	-	A_32_P149492	0.260052	8.93894	3.6475	0.00219496	0.376853	1
ENSG00000081803	CADPS2	CAPS2_HUMAN	Q86UW7	A_24_P246710	-0.374344	7.85793	-3.64697	0.00219743	0.376853	1
ENSG00000173320	STOX2	STOX2_HUMAN	Q9P2F5	A_24_P163237	-0.544039	10.5798	-3.64644	0.00219988	0.376853	1
ENSG00000105323	HNRNPUL1	HNRL1_HUMAN	Q9BUJ2	A_23_P502612	-0.310287	12.2111	-3.64476	0.00220767	0.376853	1
ENSG00000125414	MYH2	MYH2_HUMAN	Q9UKX2	A_23_P38271	-0.593844	9.12846	-3.64225	0.00221938	0.376853	1
ENSG00000138443	ABI2	ABI2_HUMAN	Q9NYB9	A_24_P933418	-0.307754	9.93883	-3.64159	0.00222244	0.376853	1
ENSG00000178301	AQP11	AQP11_HUMAN	Q8NBQ7	A_23_P417974	0.272276	8.2642	3.63873	0.00223587	0.376853	1
ENSG00000176826	-	-	-	A_23_P334709	0.358998	12.5694	3.6382	0.00223837	0.376853	1
ENSG00000122642	FKBP9	FKBP9_HUMAN	O95302	A_23_P334709	0.358998	12.5694	3.6382	0.00223837	0.376853	1
ENSG00000152377	SPOCK1	TICN1_HUMAN	Q08629	A_24_P354689	0.475633	10.2267	3.63306	0.00226273	0.376853	1
ENSG00000086475	SEPHS1	SPS1_HUMAN	P49903	A_23_P150092	-0.417516	14.1718	-3.6315	0.00227017	0.376853	1
ENSG00000249101	-	-	-	A_23_P150092	-0.417516	14.1718	-3.6315	0.00227017	0.376853	1
ENSG00000230146	-	-	-	A_23_P150092	-0.417516	14.1718	-3.6315	0.00227017	0.376853	1
ENSG00000121570	DPPA4	DPPA4_HUMAN	Q7L190	A_23_P380526	-0.379678	12.3192	-3.62494	0.0023017	0.376853	1
ENSG00000112218	GPR63	GPR63_HUMAN	Q9BZJ6	A_23_P214727	-0.295063	7.4184	-3.62487	0.00230204	0.376853	1
ENSG00000176170	SPHK1	SPHK1_HUMAN	Q9NYA1	A_23_P38106	0.24774	7.81774	3.62412	0.00230568	0.376853	1
ENSG00000253199	-	-	-	A_32_P127961	-0.981325	6.77635	-3.62313	0.00231051	0.376853	1
ENSG00000198301	SDAD1	SDA1_HUMAN	Q9NVU7	A_24_P397247	-0.389796	10.0608	-3.61923	0.00232953	0.376853	1
ENSG00000100201	DDX17	DDX17_HUMAN	Q92841	A_23_P57534	-0.242338	8.75064	-3.61577	0.00234659	0.376853	1
ENSG00000050344	NFE2L3	NF2L3_HUMAN	Q9Y4A8	A_24_P136653	-0.324896	8.31584	-3.61429	0.00235391	0.376853	1
ENSG00000075340	ADD2	ADDB_HUMAN	P35612	A_23_P209856	-0.374911	8.14134	-3.61325	0.00235904	0.376853	1
ENSG00000230615	-	-	-	A_24_P510377	0.28824	7.61414	3.61263	0.00236215	0.376853	1
ENSG00000102755	FLT1	VGFR1_HUMAN	P17948	A_24_P576191	-0.403932	8.96881	-3.60808	0.00238488	0.376853	1
ENSG00000188848	BEND4	BEND4_HUMAN	Q6ZU67	A_24_P914625	-0.304673	7.5561	-3.60806	0.00238496	0.376853	1
ENSG00000105894	PTN	PTN_HUMAN	P21246	A_23_P303087	0.423178	12.4617	3.60739	0.00238832	0.376853	1
ENSG00000117399	CDC20	CDC20_HUMAN	Q12834	A_23_P149200	-0.297346	11.6762	-3.60336	0.00240866	0.376853	1
ENSG00000179059	ZFP42	ZFP42_HUMAN	Q96MM3	A_23_P395582	-0.350819	13.1656	-3.60019	0.00242479	0.376853	1
ENSG00000182400	TRAPPC6B	TPC6B_HUMAN	Q86SZ2	A_24_P942132	0.412589	7.1257	3.5981	0.00243547	0.376853	1
ENSG00000230578	-	-	-	A_23_P217546	0.265583	10.0674	3.59591	0.00244674	0.376853	1
ENSG00000185973	TMLHE	TMLH_HUMAN	Q9NVH6	A_23_P217546	0.265583	10.0674	3.59591	0.00244674	0.376853	1
ENSG00000152332	-	-	-	A_32_P84389	0.403446	11.3531	3.59588	0.00244692	0.376853	1
ENSG00000270607	-	-	-	A_32_P187651	0.367333	7.01903	3.59583	0.00244715	0.376853	1
ENSG00000177614	PGBD5	PGBD5_HUMAN	Q8N414	A_23_P126649	-0.294945	7.66365	-3.59551	0.00244879	0.376853	1
ENSG00000164692	COL1A2	CO1A2_HUMAN	P08123	A_24_P277934	-0.341941	9.62559	-3.59457	0.00245368	0.376853	1
ENSG00000008277	ADAM22	ADA22_HUMAN	Q9P0K1	A_32_P180395	-0.258937	7.15092	-3.59378	0.00245775	0.376853	1
ENSG00000182957	SPATA13	SPT13_HUMAN	Q96N96	A_23_P390116	-0.576769	9.56293	-3.59149	0.0024696	0.377262	1
ENSG00000149532	CPSF7	CPSF7_HUMAN	Q8N684	A_23_P116376	-0.312878	8.62032	-3.58014	0.00252933	0.381642	1
ENSG00000185338	SOCS1	SOCS1_HUMAN	O15524	A_24_P48014	-0.272906	7.52593	-3.57996	0.0025303	0.381642	1
ENSG00000077684	JADE1	JADE1_HUMAN	Q6IE81	A_23_P167263	-0.31939	9.94994	-3.579	0.00253542	0.381642	1
ENSG00000100055	CYTH4	CYH4_HUMAN	Q9UIA0	A_24_P74559	0.248292	7.06773	3.57305	0.00256739	0.383643	1
ENSG00000230896	-	-	-	A_24_P842899	0.29761	8.37767	3.56625	0.00260437	0.387758	1
ENSG00000183128	CALHM3	CAHM3_HUMAN	Q86XJ0	A_24_P263297	-0.274693	7.22387	-3.56401	0.0026167	0.388188	1
ENSG00000237463	-	-	-	A_32_P725535	0.355706	6.9384	3.56182	0.00262881	0.388582	1
ENSG00000125775	SDCBP2	SDCB2_HUMAN	Q9H190	A_23_P131899	-0.272655	7.24749	-3.55141	0.00268704	0.392925	1
ENSG00000064393	HIPK2	HIPK2_HUMAN	Q9H2X6	A_23_P169766	0.32262	11.1584	3.54968	0.00269685	0.392925	1
ENSG00000144366	GULP1	GULP1_HUMAN	Q9UBP9	A_32_P153388	-0.317497	7.93351	-3.54861	0.00270293	0.392925	1
ENSG00000121281	ADCY7	ADCY7_HUMAN	P51828	A_24_P416177	0.32858	8.48064	3.54807	0.002706	0.392925	1
ENSG00000149212	SESN3	SESN3_HUMAN	P58005	A_24_P918706	0.303886	7.71924	3.54085	0.00274743	0.393748	1
ENSG00000164048	ZNF589	ZN589_HUMAN	Q86UQ0	A_23_P110031	-0.275466	10.2454	-3.53988	0.00275305	0.393748	1
ENSG00000136014	USP44	UBP44_HUMAN	Q9H0E7	A_23_P72770	-0.639367	9.66789	-3.53933	0.0027562	0.393748	1
ENSG00000085840	ORC1	ORC1_HUMAN	Q13415	A_23_P45799	-0.298555	9.01251	-3.53819	0.00276286	0.393748	1
ENSG00000135083	CCNJL	CCNJL_HUMAN	Q8IV13	A_23_P7684	-0.349124	8.73801	-3.53558	0.00277808	0.393748	1
ENSG00000198680	TUSC1	TUSC1_HUMAN	Q2TAM9	A_23_P373819	0.27219	9.53527	3.53547	0.00277874	0.393748	1
ENSG00000141644	MBD1	MBD1_HUMAN	Q9UIS9	A_23_P208090	0.29211	9.23915	3.53087	0.00280578	0.394351	1
ENSG00000111052	LIN7A	LIN7A_HUMAN	O14910	A_23_P99253	0.250889	8.92569	3.5304	0.00280855	0.394351	1
ENSG00000151065	DCP1B	DCP1B_HUMAN	Q8IZD4	A_23_P313512	0.259467	12.0094	3.52985	0.00281179	0.394351	1
ENSG00000111981	ULBP1	N2DL1_HUMAN	Q9BZM6	A_23_P156873	-0.441466	6.95596	-3.52523	0.00283928	0.396335	1
ENSG00000152061	RABGAP1L	RBG10_HUMAN	B7ZAP0	A_24_P28295	-0.415546	9.18955	-3.52291	0.00285314	0.396335	1
ENSG00000152061	RABGAP1L	RBG1L_HUMAN	Q5R372	A_24_P28295	-0.415546	9.18955	-3.52291	0.00285314	0.396335	1
ENSG00000058091	CDK14	CDK14_HUMAN	O94921	A_24_P29733	-0.349793	8.45775	-3.51995	0.00287096	0.396335	1
ENSG00000125798	FOXA2	FOXA2_HUMAN	Q9Y261	A_23_P500936	0.360811	12.9959	3.51925	0.00287525	0.396335	1
ENSG00000176022	B3GALT6	B3GT6_HUMAN	Q96L58	A_24_P174063	0.29865	9.22956	3.51722	0.00288755	0.396335	1
ENSG00000106012	IQCE	IQCE_HUMAN	Q6IPM2	A_23_P19852	0.325328	9.7552	3.51637	0.00289269	0.396335	1
ENSG00000037757	MRI1	MTNA_HUMAN	Q9BV20	A_24_P279797	0.286598	8.6416	3.51349	0.00291029	0.396335	1
ENSG00000104979	C19orf53	L10K_HUMAN	Q9UNZ5	A_24_P279797	0.286598	8.6416	3.51349	0.00291029	0.396335	1
ENSG00000251566	-	-	-	A_32_P208978	-0.372461	14.394	-3.51054	0.0029284	0.396335	1
ENSG00000250802	-	-	-	A_32_P208978	-0.372461	14.394	-3.51054	0.0029284	0.396335	1
ENSG00000105568	PPP2R1A	2AAA_HUMAN	P30153	A_23_P107661	-0.284558	12.2518	-3.50935	0.00293575	0.396335	1
ENSG00000213047	DENND1B	DEN1B_HUMAN	Q6P3S1	A_32_P204330	0.254746	8.60653	3.50859	0.00294046	0.396335	1
ENSG00000198887	SMC5	SMC5_HUMAN	Q8IY18	A_23_P146526	0.285849	9.08301	3.50278	0.00297664	0.3985	1
ENSG00000164122	ASB5	ASB5_HUMAN	Q8WWX0	A_23_P144326	0.484323	9.70553	3.5027	0.00297714	0.3985	1
ENSG00000165209	DKFZp434P151	STRBP_HUMAN	Q96SI9	A_24_P398016	-0.269759	9.14974	-3.49667	0.0030152	0.400835	1
ENSG00000165209	STRBP	STRBP_HUMAN	Q96SI9	A_24_P398016	-0.269759	9.14974	-3.49667	0.0030152	0.400835	1
ENSG00000131943	C19orf12	CS012_HUMAN	Q9NSK7	A_24_P113341	0.25631	11.1339	3.49576	0.00302092	0.400835	1
ENSG00000182095	TNRC18	TNC18_HUMAN	O15417	A_23_P377434	0.269555	11.1088	3.49313	0.0030377	0.400835	1
ENSG00000147912	FBXO10	FBX10_HUMAN	Q9UK96	A_32_P57453	0.290425	8.90608	3.49286	0.00303944	0.400835	1
ENSG00000258655	-	-	-	A_23_P25746	0.411237	9.67484	3.49113	0.0030505	0.400835	1
ENSG00000157782	CABP1	CABP1_HUMAN	Q9NZU7	A_23_P411761	-0.281744	7.27698	-3.48549	0.00308694	0.402277	1
ENSG00000100311	PDGFB	PDGFB_HUMAN	P01127	A_24_P339944	-0.420123	8.89267	-3.48203	0.00310953	0.402277	1
ENSG00000126461	SCAF1	SFR19_HUMAN	Q9H7N4	A_24_P117672	-0.312607	9.5598	-3.48175	0.00311135	0.402277	1
ENSG00000134873	CLDN10	CLD10_HUMAN	P78369	A_23_P48350	-0.382345	9.34658	-3.48063	0.0031187	0.402277	1
ENSG00000185070	FLRT2	FLRT2_HUMAN	O43155	A_23_P99802	0.417262	10.6087	3.47766	0.00313826	0.402277	1
ENSG00000189377	CXCL17	VCC1_HUMAN	Q6UXB2	A_23_P50269	0.317209	7.1688	3.47669	0.00314467	0.402277	1
ENSG00000197291	-	-	-	A_24_P924062	-1.23449	6.53666	-3.47443	0.00315963	0.402277	1
ENSG00000174607	UGT8	CGT_HUMAN	Q16880	A_23_P72747	-0.255312	7.46858	-3.47413	0.00316162	0.402277	1
ENSG00000133612	AGAP3	AGAP3_HUMAN	Q96P47	A_23_P111452	0.272673	12.2225	3.47408	0.00316199	0.402277	1
ENSG00000134042	MRO	MSTRO_HUMAN	Q9BYG7	A_23_P4545	-0.254853	7.14345	-3.46968	0.00319141	0.403537	1
ENSG00000263639	MSMB	MSMB_HUMAN	P08118	A_24_P146683	0.362868	9.41838	3.46636	0.00321373	0.403893	1
ENSG00000182054	IDH2	IDHP_HUMAN	P48735	A_23_P129209	-0.406617	9.684	-3.46571	0.00321819	0.403893	1
ENSG00000138685	FGF2	FGF2_HUMAN	P09038	A_23_P218918	-0.649249	9.95685	-3.46487	0.00322383	0.403893	1
ENSG00000074695	LMAN1	LMAN1_HUMAN	P49257	A_23_P78342	0.276105	9.51863	3.46032	0.00325484	0.404256	1
ENSG00000180628	PCGF5	PCGF5_HUMAN	Q86SE9	A_24_P880043	0.302868	7.31786	3.45883	0.00326511	0.404256	1
ENSG00000095139	ARCN1	COPD_HUMAN	P48444	A_24_P201531	-0.250469	11.5516	-3.45812	0.00326999	0.404256	1
ENSG00000131620	ANO1	ANO1_HUMAN	Q5XXA6	A_24_P110831	0.386361	6.94858	3.457	0.00327771	0.404256	1
ENSG00000270921	-	-	-	A_24_P101231	0.285289	7.05926	3.45633	0.00328228	0.404256	1
ENSG00000230304	-	-	-	A_24_P101231	0.285289	7.05926	3.45633	0.00328228	0.404256	1
ENSG00000229376	-	-	-	A_24_P101231	0.285289	7.05926	3.45633	0.00328228	0.404256	1
ENSG00000267639	-	-	-	A_24_P101231	0.285289	7.05926	3.45633	0.00328228	0.404256	1
ENSG00000274553	-	-	-	A_24_P101231	0.285289	7.05926	3.45633	0.00328228	0.404256	1
ENSG00000232852	-	-	-	A_24_P101231	0.285289	7.05926	3.45633	0.00328228	0.404256	1
ENSG00000233750	-	-	-	A_24_P101231	0.285289	7.05926	3.45633	0.00328228	0.404256	1
ENSG00000233653	-	-	-	A_24_P101231	0.285289	7.05926	3.45633	0.00328228	0.404256	1
ENSG00000215472	RPL17-C18orf32	-	-	A_24_P271049	0.241428	9.25001	3.45222	0.0033108	0.404256	1
ENSG00000177576	C18orf32	CR032_HUMAN	Q8TCD1	A_24_P271049	0.241428	9.25001	3.45222	0.0033108	0.404256	1
ENSG00000177576	RPL17-C18orf32	CR032_HUMAN	Q8TCD1	A_24_P271049	0.241428	9.25001	3.45222	0.0033108	0.404256	1
ENSG00000131467	PSME3	PSME3_HUMAN	P61289	A_23_P164141	-0.282277	12.1489	-3.45056	0.0033224	0.404256	1
ENSG00000138030	KHK	KHK_HUMAN	P50053	A_23_P5845	-0.296892	8.73025	-3.44758	0.00334331	0.404256	1
ENSG00000229919	-	-	-	A_24_P83544	0.402203	9.95223	3.44428	0.00336662	0.404256	1
ENSG00000173898	SPTBN2	SPTN2_HUMAN	O15020	A_23_P98282	-0.278327	8.77314	-3.44424	0.00336685	0.404256	1
ENSG00000122188	LAX1	LAX1_HUMAN	Q8IWV1	A_23_P438	0.257601	6.84329	3.44326	0.00337385	0.404256	1
ENSG00000058804	NDC1	NDC1_HUMAN	Q9BTX1	A_24_P222192	-0.400423	9.41377	-3.44319	0.00337429	0.404256	1
ENSG00000183688	FAM101B	F101B_HUMAN	Q8N5W9	A_24_P299318	-0.529447	11.1566	-3.43617	0.0034245	0.409079	1
ENSG00000125848	FLRT3	FLRT3_HUMAN	Q9NZU0	A_23_P166109	0.314939	12.7329	3.43199	0.00345476	0.410308	1
ENSG00000144524	COPS7B	CSN7B_HUMAN	Q9H9Q2	A_23_P79725	-0.271566	8.62037	-3.4287	0.00347874	0.410781	1
ENSG00000104447	TRPS1	TRPS1_HUMAN	Q9UHF7	A_23_P134755	0.232556	7.55032	3.42316	0.00351952	0.412214	1
ENSG00000161654	LSM12	LSM12_HUMAN	Q3MHD2	A_23_P307430	-0.320733	11.7949	-3.42116	0.0035344	0.412214	1
ENSG00000134909	ARHGAP32	RHG32_HUMAN	A7KAX9	A_24_P135344	-0.221767	8.33123	-3.41988	0.00354392	0.412214	1
ENSG00000186335	SLC36A2	S36A2_HUMAN	Q495M3	A_23_P70102	-0.317111	7.12063	-3.41943	0.00354727	0.412214	1
ENSG00000138653	NDST4	NDST4_HUMAN	Q9H3R1	A_23_P136371	0.312341	7.16888	3.4179	0.00355871	0.412214	1
ENSG00000265087	-	-	-	A_23_P251680	-0.351934	7.96675	-3.41788	0.00355884	0.412214	1
ENSG00000093010	COMT	COMT_HUMAN	P21964	A_23_P251680	-0.351934	7.96675	-3.41788	0.00355884	0.412214	1
ENSG00000233838	-	-	-	A_24_P211351	0.333768	11.9732	3.41694	0.00356586	0.412214	1
ENSG00000065150	IPO5	IPO5_HUMAN	O00410	A_24_P99071	-0.247647	11.4317	-3.41311	0.0035947	0.412214	1
ENSG00000172007	RAB33B	RB33B_HUMAN	Q9H082	A_24_P268917	0.257753	9.04321	3.412	0.00360317	0.412214	1
ENSG00000109099	PMP22	PMP22_HUMAN	Q01453	A_23_P100711	0.261408	9.95568	3.41017	0.00361706	0.412214	1
ENSG00000129451	KLK10	KLK10_HUMAN	O43240	A_24_P399490	-0.273702	7.1904	-3.40781	0.00363499	0.412214	1
ENSG00000180209	MYLPF	MLRS_HUMAN	Q96A32	A_23_P60742	0.473901	11.2532	3.40698	0.00364135	0.412214	1
ENSG00000162783	IER5	IER5_HUMAN	Q5VY09	A_23_P86330	0.30047	12.7049	3.40178	0.00368143	0.415028	1
ENSG00000196284	SUPT3H	SUPT3_HUMAN	O75486	A_32_P31666	0.264279	8.52033	3.40074	0.00368947	0.415028	1
ENSG00000204531	POU5F1	PO5F1_HUMAN	Q01860	A_24_P214841	-0.5314	14.0781	-3.39886	0.00370406	0.415028	1
ENSG00000206454	POU5F1	PO5F1_HUMAN	Q01860	A_24_P214841	-0.5314	14.0781	-3.39886	0.00370406	0.415028	1
ENSG00000235068	POU5F1	PO5F1_HUMAN	Q01860	A_24_P214841	-0.5314	14.0781	-3.39886	0.00370406	0.415028	1
ENSG00000212993	POU5F1B	P5F1B_HUMAN	Q06416	A_24_P214841	-0.5314	14.0781	-3.39886	0.00370406	0.415028	1
ENSG00000235602	-	-	-	A_24_P214841	-0.5314	14.0781	-3.39886	0.00370406	0.415028	1
ENSG00000229094	POU5F1	PO5F1_HUMAN	Q01860	A_24_P214841	-0.5314	14.0781	-3.39886	0.00370406	0.415028	1
ENSG00000237582	POU5F1	PO5F1_HUMAN	Q01860	A_24_P214841	-0.5314	14.0781	-3.39886	0.00370406	0.415028	1
ENSG00000233911	POU5F1	PO5F1_HUMAN	Q01860	A_24_P214841	-0.5314	14.0781	-3.39886	0.00370406	0.415028	1
ENSG00000230336	POU5F1	PO5F1_HUMAN	Q01860	A_24_P214841	-0.5314	14.0781	-3.39886	0.00370406	0.415028	1
ENSG00000158786	PLA2G2F	PA2GF_HUMAN	Q9BZM2	A_24_P208081	-0.336274	7.06029	-3.39757	0.00371418	0.415028	1
ENSG00000165124	SVEP1	SVEP1_HUMAN	Q4LDE5	A_24_P41276	-0.330867	6.94162	-3.39545	0.00373076	0.415028	1
ENSG00000185338	SOCS1	SOCS1_HUMAN	O15524	A_23_P420196	-0.522536	9.69118	-3.39514	0.00373319	0.415028	1
ENSG00000135968	GCC2	GCC2_HUMAN	Q8IWJ2	A_24_P917021	0.301819	8.25792	3.39255	0.00375359	0.415028	1
ENSG00000226961	-	-	-	A_24_P332651	0.30138	7.44525	3.39239	0.00375486	0.415028	1
ENSG00000150938	CRIM1	CRIM1_HUMAN	Q9NZV1	A_23_P51105	-0.247364	7.88148	-3.3921	0.0037571	0.415028	1
ENSG00000257906	-	-	-	A_32_P64598	-0.313812	7.08119	-3.38741	0.00379436	0.415845	1
ENSG00000104325	DECR1	DECR_HUMAN	Q16698	A_24_P269619	0.275629	10.6059	3.38573	0.00380778	0.415845	1
ENSG00000138629	UBL7	UBL7_HUMAN	Q96S82	A_23_P117778	-0.300904	10.2101	-3.3841	0.00382085	0.415845	1
ENSG00000227417	-	-	-	A_32_P82424	0.247413	9.89676	3.38199	0.00383787	0.415845	1
ENSG00000125871	MGME1	MGME1_HUMAN	Q9BQP7	A_24_P254285	-0.322126	9.6944	-3.38091	0.00384654	0.415845	1
ENSG00000221978	CCNL2	CCNL2_HUMAN	Q96S94	A_24_P376339	0.316214	9.78747	3.3793	0.00385963	0.415845	1
ENSG00000253868	-	-	-	A_24_P306022	0.335298	6.8961	3.37916	0.00386072	0.415845	1
ENSG00000108854	SMURF2	SMUF2_HUMAN	Q9HAU4	A_23_P100754	-0.327676	8.63648	-3.37518	0.0038932	0.415845	1
ENSG00000186111	PIP5K1C	PI51C_HUMAN	O60331	A_23_P330262	-0.294227	8.90817	-3.37353	0.00390669	0.415845	1
ENSG00000178726	THBD	TRBM_HUMAN	P07204	A_23_P91390	0.313193	8.60478	3.36736	0.00395775	0.415845	1
ENSG00000143450	OAZ3	OAZ3_HUMAN	Q9UMX2	A_23_P432583	0.238184	7.80904	3.36708	0.00396002	0.415845	1
ENSG00000164985	PSIP1	PSIP1_HUMAN	O75475	A_32_P22702	-0.483719	10.9083	-3.36688	0.00396169	0.415845	1
ENSG00000167825	OR5I1	OR5I1_HUMAN	Q13606	A_23_P150467	-0.265804	6.98583	-3.36664	0.00396372	0.415845	1
ENSG00000153786	ZDHHC7	ZDHC7_HUMAN	Q9NXF8	A_24_P373297	0.245514	11.9498	3.36406	0.0039853	0.415845	1
ENSG00000167654	ATCAY	ATCAY_HUMAN	Q86WG3	A_23_P101671	-0.412701	10.2117	-3.36366	0.0039886	0.415845	1
ENSG00000121210	KIAA0922	T131L_HUMAN	A2VDJ0	A_23_P257250	-0.289632	7.94199	-3.36279	0.00399593	0.415845	1
ENSG00000251400	-	-	-	A_23_P70231	-0.309242	12.6819	-3.36239	0.00399924	0.415845	1
ENSG00000164904	ALDH7A1	AL7A1_HUMAN	P49419	A_23_P70231	-0.309242	12.6819	-3.36239	0.00399924	0.415845	1
ENSG00000198483	ANKRD35	ANR35_HUMAN	Q8N283	A_23_P325690	-0.343963	9.74903	-3.36152	0.0040066	0.415845	1
ENSG00000157502	MUM1L1	MUML1_HUMAN	Q5H9M0	A_23_P73571	0.322901	8.24343	3.36007	0.00401881	0.415845	1
ENSG00000222371	-	-	-	A_24_P376120	-0.250367	7.02084	-3.35948	0.00402381	0.415845	1
ENSG00000138347	MYPN	MYPN_HUMAN	Q86TC9	A_24_P376120	-0.250367	7.02084	-3.35948	0.00402381	0.415845	1
ENSG00000274869	-	-	-	A_32_P4792	0.284657	7.03288	3.35898	0.00402806	0.415845	1
ENSG00000240240	-	-	-	A_32_P4792	0.284657	7.03288	3.35898	0.00402806	0.415845	1
ENSG00000240912	-	-	-	A_23_P145238	0.2888	12.0667	3.35766	0.00403922	0.415845	1
ENSG00000008311	AASS	AASS_HUMAN	Q9UDR5	A_23_P8754	-0.403482	11.228	-3.35574	0.00405558	0.415845	1
ENSG00000197038	-	-	-	A_24_P357406	-0.266067	7.05971	-3.35429	0.00406798	0.415845	1
ENSG00000151136	BTBD11	BTBDB_HUMAN	A6QL63	A_23_P419714	-0.302366	7.8482	-3.35352	0.00407452	0.415845	1
ENSG00000279332	-	-	-	A_32_P168756	-0.304166	7.49915	-3.353	0.00407903	0.415845	1
ENSG00000091436	ZAK	-	-	A_23_P318300	0.269694	9.64178	3.35214	0.00408641	0.415845	1
ENSG00000198685	LINC01565	GR6_HUMAN	O15544	A_23_P166969	0.355871	7.17206	3.34957	0.00410848	0.415845	1
ENSG00000248608	-	-	-	A_24_P418744	-0.303071	10.8485	-3.34861	0.00411683	0.415845	1
ENSG00000149679	CABLES2	CABL2_HUMAN	Q9BTV7	A_32_P175321	0.326139	10.6904	3.3483	0.00411946	0.415845	1
ENSG00000273619	-	-	-	A_32_P175321	0.326139	10.6904	3.3483	0.00411946	0.415845	1
ENSG00000142949	PTPRF	PTPRF_HUMAN	P10586	A_23_P200984	-0.236218	8.99351	-3.34785	0.00412337	0.415845	1
ENSG00000231909	-	-	-	A_24_P58037	0.289094	9.41518	3.34518	0.00414657	0.415845	1
ENSG00000183888	C1orf64	CA064_HUMAN	Q8NEQ6	A_32_P232455	0.297487	8.80443	3.34407	0.00415629	0.415845	1
ENSG00000144645	OSBPL10	OSB10_HUMAN	Q9BXB5	A_24_P117902	-0.367647	8.51852	-3.34371	0.00415943	0.415845	1
ENSG00000166526	ZNF3	ZNF3_HUMAN	P17036	A_23_P219084	-0.321153	10.3674	-3.34208	0.00417364	0.415845	1
ENSG00000070756	PABPC1	PABP1_HUMAN	P11940	A_32_P152673	-0.346547	15.8669	-3.34181	0.00417602	0.415845	1
ENSG00000230673	-	-	-	A_32_P152673	-0.346547	15.8669	-3.34181	0.00417602	0.415845	1
ENSG00000131263	RLIM	RNF12_HUMAN	Q9NVW2	A_32_P152673	-0.346547	15.8669	-3.34181	0.00417602	0.415845	1
ENSG00000143390	RFX5	RFX5_HUMAN	P48382	A_24_P20032	0.216163	10.1894	3.34043	0.00418816	0.415845	1
ENSG00000177000	MTHFR	MTHR_HUMAN	P42898	A_32_P208078	0.240505	8.61136	3.33802	0.00420946	0.415845	1
ENSG00000253729	PRKDC	PRKDC_HUMAN	P78527	A_32_P25204	-0.319369	9.17923	-3.33708	0.00421778	0.415845	1
ENSG00000060138	YBX3	YBOX3_HUMAN	P16989	A_23_P25224	-0.395486	12.4341	-3.3355	0.00423175	0.415845	1
ENSG00000089327	FXYD5	FXYD5_HUMAN	Q96DB9	A_24_P194081	-0.270163	9.81162	-3.33457	0.00424003	0.415845	1
ENSG00000176160	HSF5	HSF5_HUMAN	Q4G112	A_24_P119413	-0.388312	7.01212	-3.33432	0.00424228	0.415845	1
ENSG00000164076	CAMKV	CAMKV_HUMAN	Q8NCB2	A_23_P29680	-0.39486	8.34082	-3.33427	0.00424275	0.415845	1
ENSG00000162139	NEU3	NEUR3_HUMAN	Q9UQ49	A_32_P125820	-0.314245	9.9166	-3.33381	0.00424684	0.415845	1
ENSG00000120885	CLU	CLUS_HUMAN	P10909	A_23_P215913	-0.579892	11.4592	-3.32991	0.00428178	0.415845	1
ENSG00000137720	C11orf1	CK001_HUMAN	Q9H5F2	A_24_P406934	-0.327911	6.94295	-3.32794	0.00429956	0.415845	1
ENSG00000174963	ZIC4	ZIC4_HUMAN	Q8N9L1	A_23_P306859	0.429113	6.92012	3.32757	0.00430285	0.415845	1
ENSG00000010017	RANBP9	RANB9_HUMAN	Q96S59	A_23_P59268	0.266038	12.4878	3.32724	0.00430586	0.415845	1
ENSG00000204983	PRSS1	TRY1_HUMAN	P07477	A_23_P380754	0.401944	9.34422	3.32401	0.00433517	0.415845	1
ENSG00000228874	-	-	-	A_32_P159535	0.271673	8.26541	3.32275	0.00434668	0.415845	1
ENSG00000198284	-	-	-	A_32_P375062	-0.279958	6.90165	-3.32025	0.00436952	0.415845	1
ENSG00000268628	-	-	-	A_32_P459529	-0.332784	7.04279	-3.31922	0.00437898	0.415845	1
ENSG00000153944	MSI2	MSI2H_HUMAN	Q96DH6	A_23_P44195	0.309914	10.0286	3.3168	0.00440136	0.415845	1
ENSG00000156232	WHAMM	WHAMM_HUMAN	Q8TF30	A_24_P307827	0.232943	8.81889	3.31602	0.00440855	0.415845	1
ENSG00000228144	-	-	-	A_23_P25097	0.258036	10.4819	3.31576	0.00441096	0.415845	1
ENSG00000139233	LLPH	LLPH_HUMAN	Q9BRT6	A_23_P25097	0.258036	10.4819	3.31576	0.00441096	0.415845	1
ENSG00000015532	XYLT2	XYLT2_HUMAN	Q9H1B5	A_23_P15582	0.327075	13.5686	3.31534	0.00441484	0.415845	1
ENSG00000116017	ARID3A	ARI3A_HUMAN	Q99856	A_23_P16516	-0.259171	11.93	-3.31517	0.00441643	0.415845	1
ENSG00000130433	CACNG6	CCG6_HUMAN	Q9BXT2	A_23_P501933	-0.303561	7.92936	-3.31499	0.00441811	0.415845	1
ENSG00000006210	CX3CL1	X3CL1_HUMAN	P78423	A_24_P381901	0.282495	7.25513	3.31319	0.00443484	0.415845	1
ENSG00000133678	TMEM254	TM254_HUMAN	Q8TBM7	A_23_P97853	0.293937	10.7986	3.31294	0.00443716	0.415845	1
ENSG00000174498	IGDCC3	IGDC3_HUMAN	Q8IVU1	A_23_P3274	-0.311627	9.43088	-3.30995	0.00446515	0.415845	1
ENSG00000106852	LHX6	LHX6_HUMAN	Q9UPM6	A_23_P32177	-0.257968	7.07422	-3.30901	0.00447395	0.415845	1
ENSG00000229593	-	-	-	A_24_P486216	0.31996	7.00713	3.30768	0.00448648	0.415845	1
ENSG00000158423	RIBC1	RIBC1_HUMAN	Q8N443	A_23_P73667	0.277466	9.40769	3.30763	0.00448693	0.415845	1
ENSG00000169083	AR	ANDR_HUMAN	P10275	A_23_P113111	-0.363644	8.25514	-3.30668	0.00449585	0.415845	1
ENSG00000144810	COL8A1	CO8A1_HUMAN	P27658	A_23_P211762	0.291219	8.07251	3.30643	0.00449827	0.415845	1
ENSG00000157985	AGAP1	AGAP1_HUMAN	Q9UPQ3	A_23_P108404	-0.294997	9.69459	-3.30615	0.00450084	0.415845	1
ENSG00000162852	CNST	CNST_HUMAN	Q6PJW8	A_23_P405175	-0.323368	8.78723	-3.3054	0.00450793	0.415845	1
ENSG00000156011	PSD3	PSD3_HUMAN	Q9NYI0	A_23_P216167	-0.312918	8.70942	-3.30483	0.00451334	0.415845	1
ENSG00000156218	ADAMTSL3	ATL3_HUMAN	P82987	A_24_P400842	-0.287696	7.12867	-3.30181	0.00454213	0.416647	1
ENSG00000234337	-	-	-	A_32_P186889	-0.237283	13.0855	-3.30166	0.00454353	0.416647	1
ENSG00000261635	-	-	-	A_32_P186889	-0.237283	13.0855	-3.30166	0.00454353	0.416647	1
ENSG00000183022	-	-	-	A_32_P186889	-0.237283	13.0855	-3.30166	0.00454353	0.416647	1
ENSG00000251661	-	-	-	A_24_P924010	0.412685	7.15908	3.29755	0.00458287	0.416647	1
ENSG00000259917	-	-	-	A_24_P42122	-0.274032	11.2956	-3.29632	0.00459475	0.416647	1
ENSG00000268083	-	-	-	A_24_P42122	-0.274032	11.2956	-3.29632	0.00459475	0.416647	1
ENSG00000104824	HNRNPL	HNRPL_HUMAN	P14866	A_24_P42122	-0.274032	11.2956	-3.29632	0.00459475	0.416647	1
ENSG00000130045	NXNL2	NXNL2_HUMAN	Q5VZ03	A_23_P169319	-0.335873	7.46577	-3.29611	0.00459682	0.416647	1
ENSG00000103342	GSPT1	ERF3A_HUMAN	P15170	A_23_P206301	-0.267459	7.40552	-3.29573	0.00460041	0.416647	1
ENSG00000132591	ERAL1	ERAL1_HUMAN	O75616	A_23_P71981	-0.240452	10.4237	-3.28721	0.00468347	0.416647	1
ENSG00000163170	BOLA3	BOLA3_HUMAN	Q53S33	A_23_P131706	0.30944	12.2363	3.28696	0.00468594	0.416647	1
ENSG00000168610	STAT3	STAT3_HUMAN	P40763	A_23_P107206	-0.268212	8.25457	-3.28664	0.00468906	0.416647	1
ENSG00000133392	MYH11	MYH11_HUMAN	P35749	A_24_P70183	-0.289323	7.3207	-3.28607	0.00469469	0.416647	1
ENSG00000113356	POLR3G	RPC7_HUMAN	O15318	A_23_P41942	-0.401244	9.37924	-3.28601	0.00469525	0.416647	1
ENSG00000107099	DOCK8	DOCK8_HUMAN	Q8NF50	A_32_P181077	0.279179	8.88959	3.28366	0.00471853	0.416647	1
ENSG00000049192	ADAMTS6	ATS6_HUMAN	Q9UKP5	A_24_P334456	-0.281139	6.96374	-3.28287	0.00472634	0.416647	1
ENSG00000160961	ZNF333	ZN333_HUMAN	Q96JL9	A_24_P10715	-0.307157	7.01128	-3.28278	0.00472727	0.416647	1
ENSG00000142599	RERE	RERE_HUMAN	Q9P2R6	A_24_P342591	-0.249441	8.90695	-3.28142	0.00474076	0.416647	1
ENSG00000186868	MAPT	TAU_HUMAN	P10636	A_24_P224488	0.476307	7.10407	3.28129	0.00474199	0.416647	1
ENSG00000117226	GBP3	GBP3_HUMAN	Q9H0R5	A_24_P370702	-0.434204	7.02498	-3.27895	0.00476536	0.416647	1
ENSG00000175155	YPEL2	YPEL2_HUMAN	Q96QA6	A_24_P787947	0.268039	9.67605	3.27874	0.00476751	0.416647	1
ENSG00000135299	ANKRD6	ANKR6_HUMAN	Q9Y2G4	A_23_P70297	0.334675	10.5864	3.27816	0.0047733	0.416647	1
ENSG00000163032	VSNL1	VISL1_HUMAN	P62760	A_23_P209978	-0.5317	9.60013	-3.27743	0.00478063	0.416647	1
ENSG00000100997	ABHD12	ABD12_HUMAN	Q8N2K0	A_23_P367026	0.221485	10.3303	3.27652	0.00478974	0.416647	1
ENSG00000059377	TBXAS1	THAS_HUMAN	P24557	A_32_P212886	0.307679	9.32101	3.2765	0.00478995	0.416647	1
ENSG00000135766	EGLN1	EGLN1_HUMAN	Q9GZT9	A_23_P343935	0.269287	9.6076	3.27562	0.00479881	0.416647	1
ENSG00000164118	CEP44	CEP44_HUMAN	Q9C0F1	A_23_P385911	0.286629	8.5079	3.2729	0.00482631	0.416647	1
ENSG00000171608	PIK3CD	PK3CD_HUMAN	O00329	A_23_P259833	-0.227858	7.18466	-3.27208	0.00483457	0.416647	1
ENSG00000154548	SRSF12	SRS12_HUMAN	Q8WXF0	A_23_P110903	0.284362	9.4862	3.27102	0.00484537	0.416647	1
ENSG00000058804	NDC1	NDC1_HUMAN	Q9BTX1	A_24_P222184	-0.248241	10.4571	-3.26823	0.00487383	0.416647	1
ENSG00000167434	CA4	CAH4_HUMAN	P22748	A_23_P4096	-0.376366	7.52669	-3.26754	0.00488091	0.416647	1
ENSG00000188782	CATSPER4	CTSR4_HUMAN	Q7RTX7	A_24_P786388	0.250872	6.87637	3.26216	0.00493631	0.416647	1
ENSG00000116962	NID1	NID1_HUMAN	P14543	A_23_P200928	-0.247111	7.64886	-3.26079	0.00495048	0.416647	1
ENSG00000145284	SCD5	SCD5_HUMAN	Q86SK9	A_23_P213288	0.378069	9.45579	3.25942	0.00496474	0.416647	1
ENSG00000174963	ZIC4	ZIC4_HUMAN	Q8N9L1	A_24_P217306	0.25834	7.05468	3.25888	0.00497036	0.416647	1
ENSG00000159208	C1orf51	CIART_HUMAN	Q8N365	A_23_P410717	-0.276009	7.26204	-3.25849	0.0049744	0.416647	1
ENSG00000159208	CIART	CIART_HUMAN	Q8N365	A_23_P410717	-0.276009	7.26204	-3.25849	0.0049744	0.416647	1
ENSG00000160633	SAFB	SAFB1_HUMAN	Q15424	A_23_P208446	-0.272451	10.3247	-3.25827	0.00497677	0.416647	1
ENSG00000053747	LAMA3	LAMA3_HUMAN	Q16787	A_23_P89780	-0.414917	8.45596	-3.25442	0.00501705	0.416647	1
ENSG00000248596	-	-	-	A_32_P153589	0.32138	8.69949	3.25285	0.00503363	0.416647	1
ENSG00000119688	ABCD4	ABCD4_HUMAN	O14678	A_23_P37327	0.2394	11.3276	3.25186	0.00504411	0.416647	1
ENSG00000182841	-	-	-	A_24_P365679	-0.274425	7.12215	-3.2512	0.00505108	0.416647	1
ENSG00000132326	PER2	PER2_HUMAN	O15055	A_23_P209320	0.322008	9.20783	3.2503	0.00506063	0.416647	1
ENSG00000196208	GREB1	GREB1_HUMAN	Q4ZG55	A_23_P329768	0.285901	8.89675	3.24994	0.00506444	0.416647	1
ENSG00000227869	-	-	-	A_32_P61679	0.322118	8.9654	3.24987	0.00506523	0.416647	1
ENSG00000086015	MAST2	MAST2_HUMAN	Q6P0Q8	A_23_P126008	-0.249689	10.0096	-3.24924	0.0050719	0.416647	1
ENSG00000147883	CDKN2B	CDN2B_HUMAN	P42772	A_24_P360674	0.239784	7.97862	3.24808	0.00508425	0.416647	1
ENSG00000177189	RPS6KA3	KS6A3_HUMAN	P51812	A_32_P517749	0.288257	9.15083	3.2471	0.00509466	0.416647	1
ENSG00000165757	KIAA1462	JCAD_HUMAN	Q9P266	A_23_P301521	0.314053	10.9909	3.24539	0.00511304	0.416647	1
ENSG00000179826	MRGPRX3	MRGX3_HUMAN	Q96LB0	A_23_P389371	-0.36203	6.9502	-3.24508	0.00511628	0.416647	1
ENSG00000184731	FAM110C	F110C_HUMAN	Q1W6H9	A_32_P47643	-0.325421	8.22657	-3.24429	0.00512477	0.416647	1
ENSG00000253656	-	-	-	A_24_P737675	0.336827	6.87867	3.24356	0.00513265	0.416647	1
ENSG00000198937	CCDC167	CC167_HUMAN	Q9P0B6	A_23_P133770	0.25666	11.7192	3.24319	0.00513666	0.416647	1
ENSG00000183569	SERHL2	SEHL2_HUMAN	Q9H4I8	A_23_P120953	0.339645	10.4507	3.24284	0.00514041	0.416647	1
ENSG00000088256	GNA11	GNA11_HUMAN	P29992	A_23_P142289	-0.273232	9.31058	-3.24263	0.00514269	0.416647	1
ENSG00000158163	DZIP1L	DZI1L_HUMAN	Q8IYY4	A_23_P384635	0.302635	7.76952	3.24136	0.00515645	0.416647	1
ENSG00000182968	SOX1	SOX1_HUMAN	O00570	A_23_P434416	-0.323978	6.98772	-3.24059	0.00516476	0.416647	1
ENSG00000179051	RCC2	RCC2_HUMAN	Q9P258	A_23_P74954	-0.263712	10.9389	-3.23921	0.00517974	0.416647	1
ENSG00000230707	-	-	-	A_24_P580698	0.253504	7.47249	3.23771	0.00519599	0.416647	1
ENSG00000269502	DMRTC1	DMRTC_HUMAN	Q5HYR2	A_32_P179998	-0.2871	7.08772	-3.23588	0.00521595	0.416647	1
ENSG00000269502	DMRTC1B	DMRTC_HUMAN	Q5HYR2	A_32_P179998	-0.2871	7.08772	-3.23588	0.00521595	0.416647	1
ENSG00000184911	DMRTC1	DMRTC_HUMAN	Q5HYR2	A_32_P179998	-0.2871	7.08772	-3.23588	0.00521595	0.416647	1
ENSG00000184911	DMRTC1B	DMRTC_HUMAN	Q5HYR2	A_32_P179998	-0.2871	7.08772	-3.23588	0.00521595	0.416647	1
ENSG00000167633	KIR3DL1	KI3L1_HUMAN	P43629	A_23_P101636	-0.293507	7.04892	-3.23201	0.00525849	0.416647	1
ENSG00000240403	KIR3DL2	KI3L2_HUMAN	P43630	A_23_P101636	-0.293507	7.04892	-3.23201	0.00525849	0.416647	1
ENSG00000173193	PARP14	PAR14_HUMAN	Q460N5	A_23_P57983	0.297722	7.15358	3.2315	0.00526407	0.416647	1
ENSG00000124194	GDAP1L1	GD1L1_HUMAN	Q96MZ0	A_23_P17354	-0.348718	8.39104	-3.23066	0.00527335	0.416647	1
ENSG00000102802	MEDAG	MEDAG_HUMAN	Q5VYS4	A_23_P99515	-0.265241	7.40876	-3.23056	0.00527454	0.416647	1
ENSG00000071537	SEL1L	SE1L1_HUMAN	Q9UBV2	A_24_P219114	0.257665	7.25876	3.23017	0.00527882	0.416647	1
ENSG00000100985	MMP9	MMP9_HUMAN	P14780	A_23_P40174	-0.374082	9.12529	-3.23012	0.00527942	0.416647	1
ENSG00000142733	MAP3K6	M3K6_HUMAN	O95382	A_24_P145653	0.258882	10.4906	3.22987	0.0052821	0.416647	1
ENSG00000254887	-	-	-	A_24_P459739	0.33664	7.00118	3.22914	0.00529024	0.416647	1
ENSG00000134253	TRIM45	TRI45_HUMAN	Q9H8W5	A_23_P160523	-0.289078	7.95498	-3.22857	0.00529658	0.416647	1
ENSG00000182230	FAM153B	F153B_HUMAN	P0C7A2	A_32_P84369	-0.269384	7.01219	-3.22743	0.0053092	0.416647	1
ENSG00000170074	FAM153A	F153A_HUMAN	Q9UHL3	A_32_P84369	-0.269384	7.01219	-3.22743	0.0053092	0.416647	1
ENSG00000204677	FAM153C	F153C_HUMAN	Q494X1	A_32_P84369	-0.269384	7.01219	-3.22743	0.0053092	0.416647	1
ENSG00000100351	GRAP2	GRAP2_HUMAN	O75791	A_24_P10884	-0.264082	6.97204	-3.22458	0.00534107	0.416647	1
ENSG00000103490	PYCARD	ASC_HUMAN	Q9ULZ3	A_23_P26629	-0.329061	10.7257	-3.22343	0.00535393	0.416647	1
ENSG00000234520	-	-	-	A_32_P165557	-0.263975	7.05778	-3.22296	0.00535926	0.416647	1
ENSG00000204850	-	-	-	A_32_P74206	0.277398	7.04543	3.22144	0.00537636	0.416647	1
ENSG00000229656	-	-	-	A_24_P524164	0.332221	6.97938	3.21848	0.00540982	0.416647	1
ENSG00000171174	RBKS	RBSK_HUMAN	Q9H477	A_23_P9523	0.293414	10.0712	3.21664	0.00543067	0.416647	1
ENSG00000243978	RGAG1	RGAG1_HUMAN	Q8NET4	A_23_P306352	0.23428	6.99914	3.21639	0.00543354	0.416647	1
ENSG00000196230	TUBB	TBB5_HUMAN	P07437	A_23_P387057	-0.260425	13.3066	-3.21439	0.00545635	0.416647	1
ENSG00000167614	TTYH1	TTYH1_HUMAN	Q9H313	A_23_P50817	-0.283008	7.8211	-3.21399	0.00546092	0.416647	1
ENSG00000275650	TTYH1	TTYH1_HUMAN	Q9H313	A_23_P50817	-0.283008	7.8211	-3.21399	0.00546092	0.416647	1
ENSG00000276887	TTYH1	TTYH1_HUMAN	Q9H313	A_23_P50817	-0.283008	7.8211	-3.21399	0.00546092	0.416647	1
ENSG00000276537	TTYH1	TTYH1_HUMAN	Q9H313	A_23_P50817	-0.283008	7.8211	-3.21399	0.00546092	0.416647	1
ENSG00000224577	-	-	-	A_32_P131633	0.272657	6.95525	3.21287	0.00547375	0.416647	1
ENSG00000254621	-	-	-	A_24_P796274	-0.260643	10.638	-3.21228	0.00548058	0.416647	1
ENSG00000152217	SETBP1	SETBP_HUMAN	Q9Y6X0	A_32_P32413	0.375646	9.79993	3.21169	0.00548727	0.416647	1
ENSG00000257815	-	-	-	A_32_P36136	0.209339	9.179	3.21057	0.00550025	0.416647	1
ENSG00000125462	C1orf61	CROC4_HUMAN	Q13536	A_32_P138032	0.300902	9.05232	3.20879	0.00552072	0.416647	1
ENSG00000130741	EIF2S3	IF2G_HUMAN	P41091	A_23_P137031	-0.239059	9.85627	-3.20875	0.00552123	0.416647	1
ENSG00000180574	-	-	-	A_23_P137031	-0.239059	9.85627	-3.20875	0.00552123	0.416647	1
ENSG00000175592	FOSL1	FOSL1_HUMAN	P15407	A_23_P322519	-0.230178	7.38062	-3.20676	0.00554428	0.416647	1
ENSG00000119508	NR4A3	NR4A3_HUMAN	Q92570	A_23_P398566	0.314993	9.15816	3.20633	0.00554933	0.416647	1
ENSG00000105398	SULT2A1	ST2A1_HUMAN	Q06520	A_24_P224684	-0.338511	7.08814	-3.20574	0.00555614	0.416647	1
ENSG00000205531	NAP1L4	NP1L4_HUMAN	Q99733	A_24_P132950	-0.277184	10.0513	-3.20561	0.00555766	0.416647	1
ENSG00000130052	STARD8	STAR8_HUMAN	Q92502	A_23_P387630	-0.298178	7.7418	-3.20498	0.00556499	0.416647	1
ENSG00000005981	ASB4	ASB4_HUMAN	Q9Y574	A_23_P157205	0.234742	7.86936	3.20426	0.00557338	0.416647	1
ENSG00000008196	TFAP2B	AP2B_HUMAN	Q92481	A_24_P20954	-0.27975	7.00853	-3.20321	0.00558573	0.416647	1
ENSG00000059769	DNAJC25	DJC25_HUMAN	Q9H1X3	A_23_P397019	0.223974	8.303	3.20318	0.005586	0.416647	1
ENSG00000185236	RAB11B	RB11B_HUMAN	Q15907	A_23_P67748	-0.325746	8.66207	-3.20221	0.00559742	0.416647	1
ENSG00000090512	FETUB	FETUB_HUMAN	Q9UGM5	A_23_P144126	-0.261086	6.98291	-3.20167	0.00560368	0.416647	1
ENSG00000076706	MCAM	MUC18_HUMAN	P43121	A_23_P162171	-0.260321	10.4754	-3.2014	0.00560694	0.416647	1
ENSG00000139899	CBLN3	CBLN3_HUMAN	Q6UW01	A_23_P3159	0.25095	7.13566	3.19973	0.00562654	0.416697	1
ENSG00000225423	-	-	-	A_32_P99097	-0.271331	13.306	-3.19962	0.00562788	0.416697	1
ENSG00000061936	SFSWAP	SFSWA_HUMAN	Q12872	A_32_P109704	-0.2536	10.2192	-3.19875	0.00563808	0.416701	1
ENSG00000100714	MTHFD1	C1TC_HUMAN	P11586	A_23_P117494	-0.310031	13.1057	-3.1969	0.00566001	0.417395	1
ENSG00000231831	-	-	-	A_23_P117494	-0.310031	13.1057	-3.1969	0.00566001	0.417395	1
ENSG00000167261	DPEP2	DPEP2_HUMAN	Q9H4A9	A_23_P118025	-0.342185	7.07277	-3.19539	0.00567791	0.417395	1
ENSG00000103495	MAZ	MAZ_HUMAN	P56270	A_23_P33433	-0.250374	9.15996	-3.19424	0.00569158	0.417395	1
ENSG00000106479	ZNF862	ZN862_HUMAN	O60290	A_24_P333421	0.259178	8.08552	3.19368	0.00569826	0.417395	1
ENSG00000145242	EPHA5	EPHA5_HUMAN	P54756	A_23_P147839	-0.283562	6.9121	-3.19259	0.00571131	0.417606	1
ENSG00000162604	TM2D1	TM2D1_HUMAN	Q9BX74	A_23_P148959	0.303406	10.7644	3.19123	0.00572767	0.418059	1
ENSG00000135218	CD36	CD36_HUMAN	P16671	A_23_P111583	0.251173	7.17325	3.18836	0.00576219	0.418242	1
ENSG00000135636	DYSF	DYSF_HUMAN	O75923	A_23_P39931	-0.266789	7.76417	-3.1876	0.00577133	0.418242	1
ENSG00000119661	DNAL1	DNAL1_HUMAN	Q4LDG9	A_23_P25913	0.240082	10.1172	3.18679	0.00578107	0.418242	1
ENSG00000178104	PDE4DIP	MYOME_HUMAN	Q5VU43	A_23_P200801	0.411266	9.04397	3.18569	0.00579446	0.418249	1
ENSG00000182625	-	-	-	A_24_P24890	0.377681	10.0305	3.18511	0.00580151	0.418249	1
ENSG00000201785	-	-	-	A_24_P904903	-0.357384	10.1451	-3.18304	0.00582672	0.418551	1
ENSG00000254870	ATP6V1G2-DDX39B	-	-	A_24_P904903	-0.357384	10.1451	-3.18304	0.00582672	0.418551	1
ENSG00000198563	DDX39B	DX39B_HUMAN	Q13838	A_24_P904903	-0.357384	10.1451	-3.18304	0.00582672	0.418551	1
ENSG00000111752	PHC1	PHC1_HUMAN	P78364	A_23_P204246	-0.448649	8.66989	-3.18286	0.00582893	0.418551	1
ENSG00000110108	TMEM109	TM109_HUMAN	Q9BVC6	A_24_P47467	0.280543	11.1372	3.18024	0.00586097	0.418551	1
ENSG00000204531	POU5F1	PO5F1_HUMAN	Q01860	A_24_P340659	-0.53704	13.4644	-3.1797	0.00586762	0.418551	1
ENSG00000206454	POU5F1	PO5F1_HUMAN	Q01860	A_24_P340659	-0.53704	13.4644	-3.1797	0.00586762	0.418551	1
ENSG00000235068	POU5F1	PO5F1_HUMAN	Q01860	A_24_P340659	-0.53704	13.4644	-3.1797	0.00586762	0.418551	1
ENSG00000229094	POU5F1	PO5F1_HUMAN	Q01860	A_24_P340659	-0.53704	13.4644	-3.1797	0.00586762	0.418551	1
ENSG00000237582	POU5F1	PO5F1_HUMAN	Q01860	A_24_P340659	-0.53704	13.4644	-3.1797	0.00586762	0.418551	1
ENSG00000233911	POU5F1	PO5F1_HUMAN	Q01860	A_24_P340659	-0.53704	13.4644	-3.1797	0.00586762	0.418551	1
ENSG00000237872	-	-	-	A_24_P340659	-0.53704	13.4644	-3.1797	0.00586762	0.418551	1
ENSG00000230336	POU5F1	PO5F1_HUMAN	Q01860	A_24_P340659	-0.53704	13.4644	-3.1797	0.00586762	0.418551	1
ENSG00000184672	RALYL	RALYL_HUMAN	Q86SE5	A_23_P388220	0.514116	7.31943	3.17915	0.0058744	0.418551	1
ENSG00000149115	TNKS1BP1	TB182_HUMAN	Q9C0C2	A_23_P418597	-0.357712	8.13979	-3.17797	0.00588885	0.418551	1
ENSG00000271601	LIX1L	LIX1L_HUMAN	Q8IVB5	A_24_P687594	0.317277	9.65282	3.17681	0.00590317	0.418551	1
ENSG00000196517	SLC6A9	SC6A9_HUMAN	P48067	A_23_P11984	-0.275312	7.60591	-3.17649	0.0059072	0.418551	1
ENSG00000135074	ADAM19	ADA19_HUMAN	Q9H013	A_23_P374082	0.267073	14.8236	3.17636	0.0059088	0.418551	1
ENSG00000158234	FAIM	FAIM1_HUMAN	Q9NVQ4	A_23_P253932	0.22528	11.1139	3.17563	0.00591775	0.418551	1
ENSG00000252761	-	-	-	A_24_P367079	0.285178	6.9467	3.17202	0.00596269	0.420015	1
ENSG00000196260	SFTA2	SFTA2_HUMAN	Q6UW10	A_24_P367079	0.285178	6.9467	3.17202	0.00596269	0.420015	1
ENSG00000184371	CSF1	CSF1_HUMAN	P09603	A_23_P407012	-0.285759	7.35684	-3.17082	0.00597766	0.420015	1
ENSG00000134460	IL2RA	IL2RA_HUMAN	P01589	A_24_P230563	-0.309395	6.99486	-3.17069	0.00597934	0.420015	1
ENSG00000077152	UBE2T	UBE2T_HUMAN	Q9NPD8	A_23_P115482	0.242942	13.1912	3.16777	0.00601592	0.421864	1
ENSG00000086065	CHMP5	CHMP5_HUMAN	Q9NZZ3	A_24_P186862	0.289873	9.00807	3.16563	0.00604302	0.423043	1
ENSG00000227417	-	-	-	A_24_P186862	0.289873	9.00807	3.16563	0.00604302	0.423043	1
ENSG00000138642	HERC6	HERC6_HUMAN	Q8IVU3	A_23_P250353	-0.290204	9.21649	-3.16402	0.00606336	0.423744	1
ENSG00000043143	JADE2	JADE2_HUMAN	Q9NQC1	A_24_P226278	-0.269667	9.74459	-3.16125	0.00609858	0.42458	1
ENSG00000124098	FAM210B	F210B_HUMAN	Q96KR6	A_24_P399680	0.244145	10.7382	3.15956	0.00612022	0.42458	1
ENSG00000114013	CD86	CD86_HUMAN	P42081	A_23_P109988	-0.273887	7.09109	-3.15915	0.00612549	0.42458	1
ENSG00000165434	PGM2L1	PGM2L_HUMAN	Q6PCE3	A_32_P122703	-0.297303	9.55289	-3.15903	0.00612698	0.42458	1
ENSG00000141380	SS18	SSXT_HUMAN	Q15532	A_23_P141738	-0.255303	10.1567	-3.15801	0.00614007	0.424771	1
ENSG00000072518	MARK2	MARK2_HUMAN	Q7KZI7	A_23_P161595	-0.281591	11.5002	-3.15585	0.00616791	0.425265	1
ENSG00000136488	CSH1	CSH1_HUMAN	P0DML2	A_23_P207170	-0.559042	9.15182	-3.15472	0.00618252	0.425558	1
ENSG00000232560	LINC01549	CU037_HUMAN	A6NIU2	A_32_P15863	-0.342441	6.93103	-3.15075	0.00623411	0.427677	1
ENSG00000123505	AMD1	DCAM_HUMAN	P17707	A_23_P214121	-0.313514	11.2195	-3.14946	0.00625098	0.427987	1
ENSG00000105514	RAB3D	RAB3D_HUMAN	O95716	A_24_P236956	0.227648	10.6616	3.14354	0.00632886	0.427987	1
ENSG00000173567	GPR113	GP113_HUMAN	Q8IZF5	A_23_P68311	0.238005	7.10882	3.14229	0.00634534	0.427987	1
ENSG00000197487	GALP	GALP_HUMAN	Q9UBC7	A_23_P39171	0.239422	7.39522	3.14205	0.00634854	0.427987	1
ENSG00000138430	OLA1	OLA1_HUMAN	Q9NTK5	A_24_P114438	-0.29366	7.43531	-3.14167	0.00635365	0.427987	1
ENSG00000169758	C15orf27	CO027_HUMAN	Q2M3C6	A_23_P88678	0.346227	9.29559	3.13916	0.00638702	0.427987	1
ENSG00000182087	TMEM259	MBRL_HUMAN	Q4ZIN3	A_23_P90369	0.277997	12.9597	3.13824	0.00639932	0.427987	1
ENSG00000107201	DDX58	DDX58_HUMAN	O95786	A_23_P20814	0.314504	10.8431	3.1373	0.00641193	0.427987	1
ENSG00000064393	HIPK2	HIPK2_HUMAN	Q9H2X6	A_23_P169756	0.313061	10.8294	3.13695	0.0064166	0.427987	1
ENSG00000180198	RCC1	RCC1_HUMAN	P18754	A_23_P46309	-0.272212	9.34808	-3.13695	0.00641665	0.427987	1
ENSG00000039560	RAI14	RAI14_HUMAN	Q9P0K7	A_23_P92727	-0.284068	10.5539	-3.1366	0.00642125	0.427987	1
ENSG00000177283	FZD8	FZD8_HUMAN	Q9H461	A_23_P396858	0.359381	11.9983	3.13515	0.00644079	0.427987	1
ENSG00000142910	TINAGL1	TINAL_HUMAN	Q9GZM7	A_24_P199774	0.223419	7.47842	3.13501	0.00644264	0.427987	1
ENSG00000133800	LYVE1	LYVE1_HUMAN	Q9Y5Y7	A_23_P150457	0.218433	7.00519	3.13454	0.00644904	0.427987	1
ENSG00000083457	ITGAE	ITAE_HUMAN	P38570	A_23_P218375	0.26153	10.7335	3.13447	0.00644992	0.427987	1
ENSG00000172318	B3GALT1	B3GT1_HUMAN	Q9Y5Z6	A_23_P108564	-0.303309	7.92473	-3.13281	0.00647235	0.427987	1
ENSG00000204385	SLC44A4	CTL4_HUMAN	Q53GD3	A_23_P93349	-0.341356	7.04579	-3.13243	0.0064775	0.427987	1
ENSG00000228263	SLC44A4	CTL4_HUMAN	Q53GD3	A_23_P93349	-0.341356	7.04579	-3.13243	0.0064775	0.427987	1
ENSG00000231479	SLC44A4	CTL4_HUMAN	Q53GD3	A_23_P93349	-0.341356	7.04579	-3.13243	0.0064775	0.427987	1
ENSG00000229077	SLC44A4	CTL4_HUMAN	Q53GD3	A_23_P93349	-0.341356	7.04579	-3.13243	0.0064775	0.427987	1
ENSG00000235336	SLC44A4	CTL4_HUMAN	Q53GD3	A_23_P93349	-0.341356	7.04579	-3.13243	0.0064775	0.427987	1
ENSG00000206378	SLC44A4	CTL4_HUMAN	Q53GD3	A_23_P93349	-0.341356	7.04579	-3.13243	0.0064775	0.427987	1
ENSG00000232180	SLC44A4	CTL4_HUMAN	Q53GD3	A_23_P93349	-0.341356	7.04579	-3.13243	0.0064775	0.427987	1
ENSG00000023572	GLRX2	GLRX2_HUMAN	Q9NS18	A_23_P160503	0.236487	10.0888	3.13119	0.00649434	0.427987	1
ENSG00000251192	ZNF674	ZN674_HUMAN	Q2M3X9	A_24_P92558	-0.294584	7.19624	-3.13047	0.00650414	0.427987	1
ENSG00000168038	ULK4	ULK4_HUMAN	Q96C45	A_23_P254680	-0.290122	7.11911	-3.13047	0.00650418	0.427987	1
ENSG00000141738	GRB7	GRB7_HUMAN	Q14451	A_23_P163992	-0.304391	9.09653	-3.12877	0.0065273	0.427987	1
ENSG00000183199	-	-	-	A_24_P161525	-0.393431	12.569	-3.12691	0.00655273	0.427987	1
ENSG00000172339	ALG14	ALG14_HUMAN	Q96F25	A_23_P257423	0.255773	9.84333	3.12679	0.00655432	0.427987	1
ENSG00000170412	GPRC5C	GPC5C_HUMAN	Q9NQ84	A_23_P346670	0.259182	8.55126	3.12648	0.00655864	0.427987	1
ENSG00000072195	SPEG	SPEG_HUMAN	Q15772	A_24_P932988	0.252179	7.13978	3.12435	0.00658792	0.427987	1
ENSG00000189431	RASSF10	RASFA_HUMAN	A6NK89	A_32_P52414	0.316222	8.58824	3.1239	0.00659409	0.427987	1
ENSG00000154645	CHODL	CHODL_HUMAN	Q9H9P2	A_23_P68669	0.276112	9.98998	3.12331	0.0066022	0.427987	1
ENSG00000115306	SPTBN1	SPTB2_HUMAN	Q01082	A_23_P339095	-0.27955	9.19169	-3.12328	0.00660261	0.427987	1
ENSG00000141736	ERBB2	ERBB2_HUMAN	P04626	A_24_P284420	-0.230696	7.50265	-3.12321	0.00660358	0.427987	1
ENSG00000168903	BTNL3	BTNL3_HUMAN	Q6UXE8	A_23_P158297	-0.272542	6.96783	-3.12118	0.00663173	0.427987	1
ENSG00000240667	-	-	-	A_32_P366909	-0.316019	6.98147	-3.12111	0.00663264	0.427987	1
ENSG00000229021	-	-	-	A_32_P366909	-0.316019	6.98147	-3.12111	0.00663264	0.427987	1
ENSG00000100249	C22orf31	CV031_HUMAN	O95567	A_23_P132237	0.255655	6.96169	3.12109	0.00663293	0.427987	1
ENSG00000164162	ANAPC10	APC10_HUMAN	Q9UM13	A_23_P250994	0.221936	10.7971	3.12081	0.00663676	0.427987	1
ENSG00000170634	ACYP2	ACYP2_HUMAN	P14621	A_23_P256988	0.249491	8.62571	3.11694	0.0066907	0.430268	1
ENSG00000111536	IL26	IL26_HUMAN	Q9NPH9	A_23_P128503	0.207489	7.18862	3.11532	0.00671332	0.431048	1
ENSG00000091136	LAMB1	LAMB1_HUMAN	P07942	A_23_P94030	0.225965	13.3947	3.11423	0.00672863	0.431357	1
ENSG00000168260	C14orf183	CN183_HUMAN	Q8WXQ3	A_32_P496893	0.345344	6.81831	3.11141	0.0067685	0.431677	1
ENSG00000127831	VIL1	VILI_HUMAN	P09327	A_23_P16866	0.340364	11.4816	3.11103	0.00677375	0.431677	1
ENSG00000272767	-	-	-	A_23_P86434	0.330009	9.68111	3.10928	0.00679857	0.431677	1
ENSG00000165105	RASEF	RASEF_HUMAN	Q8IZ41	A_24_P183994	-0.331604	6.94427	-3.10911	0.00680102	0.431677	1
ENSG00000178202	KDELC2	KDEL2_HUMAN	Q7Z4H8	A_23_P388200	-0.30968	7.6301	-3.10751	0.00682386	0.431677	1
ENSG00000111276	CDKN1B	CDN1B_HUMAN	P46527	A_24_P81841	0.282466	10.3176	3.10741	0.00682519	0.431677	1
ENSG00000151657	KIN	KIN17_HUMAN	O60870	A_24_P317874	0.251205	10.7999	3.10615	0.00684329	0.431677	1
ENSG00000120833	SOCS2	SOCS2_HUMAN	O14508	A_23_P128215	0.310807	11.6024	3.10576	0.00684881	0.431677	1
ENSG00000113083	LOX	LYOX_HUMAN	P28300	A_23_P122216	0.275861	9.23642	3.10536	0.00685446	0.431677	1
ENSG00000008952	SEC62	SEC62_HUMAN	Q99442	A_23_P357856	0.236913	8.19004	3.10238	0.00689725	0.431677	1
ENSG00000127946	HIP1	HIP1_HUMAN	O00291	A_24_P55391	-0.237854	10.7245	-3.10174	0.0069065	0.431677	1
ENSG00000261548	-	-	-	A_23_P338113	-0.232818	9.49217	-3.10115	0.00691512	0.431677	1
ENSG00000162924	REL	REL_HUMAN	Q04864	A_32_P177685	0.248047	8.71291	3.10086	0.00691931	0.431677	1
ENSG00000267520	-	-	-	A_32_P177685	0.248047	8.71291	3.10086	0.00691931	0.431677	1
ENSG00000272134	-	-	-	A_24_P921186	0.261846	7.13932	3.09967	0.00693651	0.431677	1
ENSG00000007264	MATK	MATK_HUMAN	P42679	A_23_P50678	-0.28498	8.11574	-3.09919	0.00694348	0.431677	1
ENSG00000172819	RARG	RARG_HUMAN	P13631	A_23_P387552	-0.305815	10.0084	-3.09886	0.00694826	0.431677	1
ENSG00000125107	CNOT1	CNOT1_HUMAN	A5YKK6	A_23_P77371	-0.247653	10.6727	-3.09822	0.00695755	0.431677	1
ENSG00000214124	-	-	-	A_24_P306788	0.242909	11.0202	3.09741	0.00696929	0.431677	1
ENSG00000172264	MACROD2	MACD2_HUMAN	A1Z1Q3	A_24_P930015	-0.350699	6.93598	-3.09554	0.00699657	0.431677	1
ENSG00000237401	-	-	-	A_32_P197744	0.363781	7.0708	3.09475	0.00700807	0.431677	1
ENSG00000081148	IMPG2	IMPG2_HUMAN	Q9BZV3	A_23_P18119	0.264619	7.0545	3.09418	0.0070164	0.431677	1
ENSG00000157110	RBPMS	RBPMS_HUMAN	Q93062	A_23_P71316	-0.330923	11.3199	-3.09336	0.00702851	0.431677	1
ENSG00000167670	CHAF1A	CAF1A_HUMAN	Q13111	A_24_P53519	-0.279105	12.6637	-3.09282	0.00703645	0.431677	1
ENSG00000182613	OR2V2	OR2V2_HUMAN	Q96R30	A_23_P18913	0.284534	7.01424	3.09269	0.00703827	0.431677	1
ENSG00000167614	TTYH1	TTYH1_HUMAN	Q9H313	A_23_P50815	-0.310641	10.5248	-3.08887	0.00709465	0.43262	1
ENSG00000150510	FAM124A	F124A_HUMAN	Q86V42	A_24_P239538	0.269733	9.63184	3.08732	0.0071176	0.43262	1
ENSG00000154310	TNIK	-	-	A_24_P350576	-0.422709	8.13999	-3.08651	0.00712972	0.43262	1
ENSG00000177311	ZBTB38	ZBT38_HUMAN	Q8NAP3	A_23_P380076	0.260491	9.51348	3.0835	0.00717455	0.43262	1
ENSG00000237289	CKMT1A	KCRU_HUMAN	P12532	A_23_P163227	-0.479054	10.7421	-3.08104	0.00721148	0.43262	1
ENSG00000237289	CKMT1B	KCRU_HUMAN	P12532	A_23_P163227	-0.479054	10.7421	-3.08104	0.00721148	0.43262	1
ENSG00000223572	CKMT1A	KCRU_HUMAN	P12532	A_23_P163227	-0.479054	10.7421	-3.08104	0.00721148	0.43262	1
ENSG00000223572	CKMT1B	KCRU_HUMAN	P12532	A_23_P163227	-0.479054	10.7421	-3.08104	0.00721148	0.43262	1
ENSG00000107984	DKK1	DKK1_HUMAN	O94907	A_23_P24129	0.343231	10.5883	3.08028	0.00722292	0.43262	1
ENSG00000265148	-	-	-	A_24_P829107	-0.289331	7.09361	-3.08002	0.00722688	0.43262	1
ENSG00000175077	RTP1	RTP1_HUMAN	P59025	A_23_P155407	-0.313223	8.3245	-3.07923	0.0072389	0.43262	1
ENSG00000057252	SOAT1	SOAT1_HUMAN	P35610	A_24_P216654	0.315799	9.05857	3.07897	0.00724283	0.43262	1
ENSG00000169313	P2RY12	P2Y12_HUMAN	Q9H244	A_23_P143902	-0.332634	7.01041	-3.07852	0.00724952	0.43262	1
ENSG00000240624	-	-	-	A_24_P754989	0.217976	7.36222	3.07757	0.00726393	0.43262	1
ENSG00000204414	CSHL1	CSHL_HUMAN	Q14406	A_23_P344408	-0.323302	7.7954	-3.07756	0.00726416	0.43262	1
ENSG00000224320	HLA-A	1A01_HUMAN	P30443	A_23_P408353	-0.263291	10.6244	-3.07553	0.007295	0.43262	1
ENSG00000224320	HLA-A	1A24_HUMAN	P05534	A_23_P408353	-0.263291	10.6244	-3.07553	0.007295	0.43262	1
ENSG00000224320	HLA-A	1A36_HUMAN	P30455	A_23_P408353	-0.263291	10.6244	-3.07553	0.007295	0.43262	1
ENSG00000224320	HLA-A	1A80_HUMAN	Q09160	A_23_P408353	-0.263291	10.6244	-3.07553	0.007295	0.43262	1
ENSG00000227715	HLA-A	1A02_HUMAN	P01892	A_23_P408353	-0.263291	10.6244	-3.07553	0.007295	0.43262	1
ENSG00000206505	HLA-A	1A25_HUMAN	P18462	A_23_P408353	-0.263291	10.6244	-3.07553	0.007295	0.43262	1
ENSG00000206505	HLA-A	1A26_HUMAN	P30450	A_23_P408353	-0.263291	10.6244	-3.07553	0.007295	0.43262	1
ENSG00000206505	HLA-A	1A34_HUMAN	P30453	A_23_P408353	-0.263291	10.6244	-3.07553	0.007295	0.43262	1
ENSG00000206505	HLA-A	1A43_HUMAN	P30456	A_23_P408353	-0.263291	10.6244	-3.07553	0.007295	0.43262	1
ENSG00000206505	HLA-A	1A66_HUMAN	P30457	A_23_P408353	-0.263291	10.6244	-3.07553	0.007295	0.43262	1
ENSG00000229215	HLA-A	1A01_HUMAN	P30443	A_23_P408353	-0.263291	10.6244	-3.07553	0.007295	0.43262	1
ENSG00000229215	HLA-A	1A24_HUMAN	P05534	A_23_P408353	-0.263291	10.6244	-3.07553	0.007295	0.43262	1
ENSG00000229215	HLA-A	1A36_HUMAN	P30455	A_23_P408353	-0.263291	10.6244	-3.07553	0.007295	0.43262	1
ENSG00000229215	HLA-A	1A80_HUMAN	Q09160	A_23_P408353	-0.263291	10.6244	-3.07553	0.007295	0.43262	1
ENSG00000206503	HLA-A	1A03_HUMAN	P04439	A_23_P408353	-0.263291	10.6244	-3.07553	0.007295	0.43262	1
ENSG00000206503	HLA-A	1A11_HUMAN	P13746	A_23_P408353	-0.263291	10.6244	-3.07553	0.007295	0.43262	1
ENSG00000206503	HLA-A	1A30_HUMAN	P16188	A_23_P408353	-0.263291	10.6244	-3.07553	0.007295	0.43262	1
ENSG00000223980	HLA-A	1A23_HUMAN	P30447	A_23_P408353	-0.263291	10.6244	-3.07553	0.007295	0.43262	1
ENSG00000223980	HLA-A	1A32_HUMAN	P10314	A_23_P408353	-0.263291	10.6244	-3.07553	0.007295	0.43262	1
ENSG00000223980	HLA-A	1A74_HUMAN	P30459	A_23_P408353	-0.263291	10.6244	-3.07553	0.007295	0.43262	1
ENSG00000235657	HLA-A	1A02_HUMAN	P01892	A_23_P408353	-0.263291	10.6244	-3.07553	0.007295	0.43262	1
ENSG00000235657	HLA-A	1A68_HUMAN	P01891	A_23_P408353	-0.263291	10.6244	-3.07553	0.007295	0.43262	1
ENSG00000235657	HLA-A	1A69_HUMAN	P10316	A_23_P408353	-0.263291	10.6244	-3.07553	0.007295	0.43262	1
ENSG00000231834	HLA-A	1A29_HUMAN	P30512	A_23_P408353	-0.263291	10.6244	-3.07553	0.007295	0.43262	1
ENSG00000231834	HLA-A	1A31_HUMAN	P16189	A_23_P408353	-0.263291	10.6244	-3.07553	0.007295	0.43262	1
ENSG00000231834	HLA-A	1A33_HUMAN	P16190	A_23_P408353	-0.263291	10.6244	-3.07553	0.007295	0.43262	1
ENSG00000136630	HLX	HLX_HUMAN	Q14774	A_23_P126266	0.423659	7.70983	3.07519	0.0073001	0.43262	1
ENSG00000111405	ENDOU	ENDOU_HUMAN	P21128	A_24_P52887	0.31504	6.92828	3.07445	0.00731139	0.43262	1
ENSG00000168077	SCARA3	SCAR3_HUMAN	Q6AZY7	A_23_P215900	-0.500033	11.1462	-3.07413	0.0073163	0.43262	1
ENSG00000172318	B3GALT1	B3GT1_HUMAN	Q9Y5Z6	A_32_P154361	-0.416728	9.46621	-3.0706	0.00737038	0.43262	1
ENSG00000101871	MID1	TRI18_HUMAN	O15344	A_32_P128656	-0.323349	8.09898	-3.06925	0.00739114	0.43262	1
ENSG00000171148	TADA3	TADA3_HUMAN	O75528	A_23_P305016	-0.216153	10.5474	-3.06909	0.00739361	0.43262	1
ENSG00000239789	MRPS17	RT17_HUMAN	Q9Y2R5	A_23_P258321	0.241229	12.8504	3.069	0.00739501	0.43262	1
ENSG00000249773	MRPS17	-	-	A_23_P258321	0.241229	12.8504	3.069	0.00739501	0.43262	1
ENSG00000172432	GTPBP2	GTPB2_HUMAN	Q9BX10	A_24_P77826	0.289886	7.13153	3.06846	0.00740333	0.43262	1
ENSG00000261356	-	-	-	A_24_P316059	-0.310332	8.9621	-3.06817	0.00740788	0.43262	1
ENSG00000074527	NTN4	NET4_HUMAN	Q9HB63	A_23_P204630	0.342101	10.2684	3.06774	0.00741441	0.43262	1
ENSG00000272545	-	-	-	A_32_P119769	0.414456	7.0564	3.06767	0.0074156	0.43262	1
ENSG00000166130	IKBIP	IKIP_HUMAN	Q70UQ0	A_23_P53467	0.226101	9.76754	3.06758	0.00741692	0.43262	1
ENSG00000177119	ANO6	ANO6_HUMAN	Q4KMQ2	A_23_P389118	0.284056	11.1815	3.06738	0.00742006	0.43262	1
ENSG00000162174	ASRGL1	ASGL1_HUMAN	Q7L266	A_23_P379864	0.280333	10.5121	3.06599	0.0074415	0.43262	1
ENSG00000164736	SOX17	SOX17_HUMAN	Q9H6I2	A_23_P82775	0.237483	15.3668	3.06463	0.00746271	0.43262	1
ENSG00000168461	RAB31	RAB31_HUMAN	Q13636	A_23_P141688	-0.394986	11.1105	-3.06402	0.00747221	0.43262	1
ENSG00000174501	ANKRD36C	AN36C_HUMAN	Q5JPF3	A_24_P203630	0.386029	8.86825	3.06365	0.007478	0.43262	1
ENSG00000135976	ANKRD36	AN36A_HUMAN	A6QL64	A_24_P203630	0.386029	8.86825	3.06365	0.007478	0.43262	1
ENSG00000196912	ANKRD36B	AN36B_HUMAN	Q8N2N9	A_24_P203630	0.386029	8.86825	3.06365	0.007478	0.43262	1
ENSG00000235109	ZSCAN31	ZSC31_HUMAN	Q96LW9	A_23_P214533	-0.260663	7.65434	-3.06328	0.00748381	0.43262	1
ENSG00000134363	FST	FST_HUMAN	P19883	A_23_P110531	0.232757	13.8333	3.06318	0.00748528	0.43262	1
ENSG00000013810	ERIC-1s	TACC3_HUMAN	Q9Y6A5	A_23_P212844	-0.318986	10.6272	-3.06095	0.00752024	0.433421	1
ENSG00000013810	TACC3	TACC3_HUMAN	Q9Y6A5	A_23_P212844	-0.318986	10.6272	-3.06095	0.00752024	0.433421	1
ENSG00000196123	KIAA0895L	K895L_HUMAN	Q68EN5	A_24_P922062	0.238373	7.25954	3.05706	0.00758141	0.434279	1
ENSG00000234224	TMEM229A	T229A_HUMAN	B2RXF0	A_32_P47027	0.262274	9.48384	3.05673	0.00758663	0.434279	1
ENSG00000165699	TSC1	TSC1_HUMAN	Q92574	A_24_P329635	0.268264	9.83737	3.0565	0.00759024	0.434279	1
ENSG00000175287	PHYHD1	PHYD1_HUMAN	Q5SRE7	A_23_P72001	-0.248758	10.0861	-3.05407	0.00762878	0.434279	1
ENSG00000145014	TMEM44	TMM44_HUMAN	Q2T9K0	A_24_P615181	0.244035	7.07077	3.05332	0.0076408	0.434279	1
ENSG00000119714	GPR68	OGR1_HUMAN	Q15743	A_23_P54243	0.307672	7.17116	3.05029	0.00768912	0.4351	1
ENSG00000257998	-	-	-	A_24_P307104	-0.371879	7.04872	-3.05016	0.00769135	0.4351	1
ENSG00000157570	TSPAN18	TSN18_HUMAN	Q96SJ8	A_24_P13083	-0.354808	9.01647	-3.05004	0.00769328	0.4351	1
ENSG00000119866	BCL11A	BC11A_HUMAN	Q9H165	A_23_P218584	-0.215325	7.45156	-3.04892	0.00771116	0.4351	1
ENSG00000158014	SLC30A2	ZNT2_HUMAN	Q9BRI3	A_23_P319083	0.317926	7.06298	3.04727	0.00773768	0.4351	1
ENSG00000213160	KLHL23	KLH23_HUMAN	Q8NBE8	A_23_P165414	-0.279255	9.48022	-3.04572	0.00776285	0.4351	1
ENSG00000173598	NUDT4	NUDT4_HUMAN	Q9NZJ9	A_23_P2366	0.300429	12.6581	3.04382	0.00779356	0.4351	1
ENSG00000271121	-	-	-	A_23_P2366	0.300429	12.6581	3.04382	0.00779356	0.4351	1
ENSG00000177144	-	-	-	A_23_P2366	0.300429	12.6581	3.04382	0.00779356	0.4351	1
ENSG00000125166	GOT2	AATM_HUMAN	P00505	A_23_P106575	-0.25381	11.9679	-3.04253	0.00781452	0.4351	1
ENSG00000165443	PHYHIPL	PHIPL_HUMAN	Q96FC7	A_24_P940545	0.392812	7.09594	3.04122	0.00783584	0.4351	1
ENSG00000162994	CLHC1	CLHC1_HUMAN	Q8NHS4	A_23_P257417	0.222924	7.93344	3.04098	0.00783978	0.4351	1
ENSG00000115009	CCL20	CCL20_HUMAN	P78556	A_23_P17065	-0.410951	6.92754	-3.04092	0.00784075	0.4351	1
ENSG00000205309	NT5M	NT5M_HUMAN	Q9NPB1	A_23_P3946	-0.277096	8.29675	-3.04065	0.00784515	0.4351	1
ENSG00000146386	ABRACL	ABRAL_HUMAN	Q9P1F3	A_32_P160972	-0.410683	13.0371	-3.04024	0.00785197	0.4351	1
ENSG00000197629	MPEG1	MPEG1_HUMAN	Q2M385	A_23_P127727	0.333174	7.19374	3.03997	0.00785643	0.4351	1
ENSG00000165583	SSX5	SSX5_HUMAN	O60225	A_23_P84359	0.255593	7.64121	3.03788	0.00789057	0.435646	1
ENSG00000120709	FAM53C	FA53C_HUMAN	Q9NYF3	A_24_P380234	0.252059	10.0988	3.03763	0.00789474	0.435646	1
ENSG00000175449	RFESD	RFESD_HUMAN	Q8TAC1	A_23_P251647	0.260208	8.59962	3.03563	0.0079277	0.435646	1
ENSG00000164609	SLU7	SLU7_HUMAN	O95391	A_24_P174824	0.278534	11.5814	3.03465	0.00794388	0.435646	1
ENSG00000154845	PPP4R1	PP4R1_HUMAN	Q8TF05	A_23_P15857	-0.315589	9.26905	-3.03437	0.00794861	0.435646	1
ENSG00000166483	WEE1	WEE1_HUMAN	P30291	A_23_P127926	-0.33567	10.4172	-3.03369	0.00795981	0.435646	1
ENSG00000099617	EFNA2	EFNA2_HUMAN	O43921	A_23_P119535	0.211722	7.1664	3.03189	0.00798976	0.435646	1
ENSG00000066777	ARFGEF1	BIG1_HUMAN	Q9Y6D6	A_23_P82941	-0.246997	10.3545	-3.03073	0.00800903	0.435646	1
ENSG00000158427	TMSB15B	TB15B_HUMAN	P0CG35	A_23_P96599	0.425963	12.4739	3.03039	0.0080147	0.435646	1
ENSG00000269226	TMSB15B	TB15B_HUMAN	P0CG35	A_23_P96599	0.425963	12.4739	3.03039	0.0080147	0.435646	1
ENSG00000168701	TMEM208	TM208_HUMAN	Q9BTX3	A_23_P206369	0.203713	13.3933	3.02882	0.00804097	0.436288	1
ENSG00000157181	ODR4	ODR4_HUMAN	Q5SWX8	A_32_P148824	0.307672	9.96342	3.02799	0.0080549	0.436288	1
ENSG00000100403	ZC3H7B	Z3H7B_HUMAN	Q9UGR2	A_23_P218807	0.342264	8.91418	3.02778	0.00805837	0.436288	1
ENSG00000230303	-	-	-	A_32_P151851	0.327834	7.00112	3.02388	0.00812413	0.437473	1
ENSG00000226877	-	-	-	A_32_P151851	0.327834	7.00112	3.02388	0.00812413	0.437473	1
ENSG00000165476	REEP3	REEP3_HUMAN	Q6NUK4	A_23_P75028	0.281483	11.0712	3.02381	0.00812525	0.437473	1
ENSG00000256628	-	-	-	A_32_P33561	0.207397	7.83167	3.02311	0.00813708	0.437473	1
ENSG00000280108	-	-	-	A_23_P352990	0.36522	6.93144	3.0219	0.00815766	0.437473	1
ENSG00000278923	-	-	-	A_23_P352990	0.36522	6.93144	3.0219	0.00815766	0.437473	1
ENSG00000178457	-	-	-	A_23_P352990	0.36522	6.93144	3.0219	0.00815766	0.437473	1
ENSG00000114841	DNAH1	DYH1_HUMAN	Q9P2D7	A_24_P917175	-0.295917	6.91322	-3.01911	0.00820509	0.437473	1
ENSG00000162188	GNG3	GBG3_HUMAN	P63215	A_23_P139192	-0.295503	7.71468	-3.01903	0.00820653	0.437473	1
ENSG00000074181	NOTCH3	NOTC3_HUMAN	Q9UM47	A_24_P399606	-0.209458	8.04485	-3.01741	0.0082342	0.437473	1
ENSG00000271855	-	-	-	A_32_P182045	0.227989	8.18883	3.01731	0.00823592	0.437473	1
ENSG00000133083	DCLK1	DCLK1_HUMAN	O15075	A_23_P44894	-0.286175	7.07714	-3.01615	0.00825583	0.437473	1
ENSG00000149328	GLB1L2	GLBL2_HUMAN	Q8IW92	A_24_P73109	-0.229275	7.22991	-3.01526	0.00827112	0.437473	1
ENSG00000110446	SLC15A3	S15A3_HUMAN	Q8IY34	A_23_P75786	-0.287273	7.79679	-3.01521	0.00827202	0.437473	1
ENSG00000077782	FGFR1	FGFR1_HUMAN	P11362	A_23_P372923	-0.342579	8.8201	-3.01425	0.00828866	0.437473	1
ENSG00000179342	-	-	-	A_24_P127159	-0.237594	7.63122	-3.01364	0.00829907	0.437473	1
ENSG00000176845	METRNL	METRL_HUMAN	Q641Q3	A_23_P10591	-0.353846	11.331	-3.01315	0.00830767	0.437473	1
ENSG00000144460	NYAP2	NYAP2_HUMAN	Q9P242	A_24_P49427	-0.294884	6.86044	-3.01224	0.00832331	0.437473	1
ENSG00000162949	CAPN13	CAN13_HUMAN	Q6MZZ7	A_23_P101972	0.344656	10.3879	3.01214	0.00832504	0.437473	1
ENSG00000100393	EP300	EP300_HUMAN	Q09472	A_23_P40693	-0.278954	9.55215	-3.01006	0.00836122	0.437665	1
ENSG00000251637	-	-	-	A_32_P69333	0.336022	8.92682	3.00975	0.00836662	0.437665	1
ENSG00000120860	CCDC53	CCD53_HUMAN	Q9Y3C0	A_23_P53567	0.230903	10.4188	3.00925	0.00837521	0.437665	1
ENSG00000261496	-	-	-	A_24_P810104	0.225669	7.75013	3.00893	0.00838089	0.437665	1
ENSG00000158560	DYNC1I1	DC1I1_HUMAN	O14576	A_23_P93737	0.259067	9.37068	3.00886	0.00838201	0.437665	1
ENSG00000136542	GALNT5	GALT5_HUMAN	Q7Z7M9	A_23_P108427	-0.245582	6.80041	-3.00754	0.0084051	0.437946	1
ENSG00000158315	RHBDL2	RHBL2_HUMAN	Q9NX52	A_24_P225534	-0.260788	6.91606	-3.00599	0.00843231	0.438619	1
ENSG00000119522	DENND1A	DEN1A_HUMAN	Q8TEH3	A_32_P23854	0.209822	9.82385	3.00466	0.00845574	0.43898	1
ENSG00000229035	-	-	-	A_23_P126089	0.299172	7.57497	3.00407	0.00846609	0.43898	1
ENSG00000071082	RPL31	RL31_HUMAN	P62899	A_24_P97257	0.230103	8.59675	3.00344	0.00847717	0.43898	1
ENSG00000164176	EDIL3	EDIL3_HUMAN	O43854	A_23_P401606	-0.421706	8.35599	-3.00317	0.00848197	0.43898	1
ENSG00000182768	NGRN	NGRN_HUMAN	Q9NPE2	A_24_P289636	0.408606	10.0948	3.00251	0.00849358	0.439027	1
ENSG00000205726	ITSN1	ITSN1_HUMAN	Q15811	A_23_P252962	0.214866	10.3982	3.00077	0.00852433	0.440063	1
ENSG00000198003	CCDC151	CC151_HUMAN	A5D8V7	A_23_P326893	-0.260462	8.6556	-2.99876	0.00856011	0.44092	1
ENSG00000009724	MASP2	MASP2_HUMAN	O00187	A_23_P301971	-0.209257	7.6636	-2.99863	0.00856239	0.44092	1
ENSG00000143845	ETNK2	EKI2_HUMAN	Q9NVF9	A_23_P200707	-0.242214	7.54197	-2.99797	0.00857414	0.440972	1
ENSG00000178878	APOLD1	APLD1_HUMAN	Q96LR9	A_23_P48217	0.377146	8.84973	2.99673	0.00859626	0.441245	1
ENSG00000166342	NETO1	NETO1_HUMAN	Q8TDF5	A_23_P4489	-0.300504	7.69747	-2.99647	0.00860091	0.441245	1
ENSG00000003147	ICA1	ICA69_HUMAN	Q05084	A_24_P372012	-0.220581	8.68275	-2.99437	0.0086386	0.442553	1
ENSG00000003147	ICAp69	ICA69_HUMAN	Q05084	A_24_P372012	-0.220581	8.68275	-2.99437	0.0086386	0.442553	1
ENSG00000132466	ANKRD17	ANR17_HUMAN	O75179	A_23_P144378	-0.270516	12.0626	-2.99208	0.00867981	0.442553	1
ENSG00000165934	CPSF2	CPSF2_HUMAN	Q9P2I0	A_23_P99837	0.199984	10.4659	2.99174	0.00868585	0.442553	1
ENSG00000148660	CAMK2G	KCC2G_HUMAN	Q13555	A_24_P141332	0.250159	10.4155	2.99098	0.00869976	0.442553	1
ENSG00000151376	ME3	MAON_HUMAN	Q16798	A_23_P116614	0.258167	8.50115	2.99056	0.00870727	0.442553	1
ENSG00000225859	DDX39B	DX39B_HUMAN	Q13838	A_32_P36192	-0.41465	12.6214	-2.99	0.00871735	0.442553	1
ENSG00000254870	ATP6V1G2-DDX39B	-	-	A_32_P36192	-0.41465	12.6214	-2.99	0.00871735	0.442553	1
ENSG00000198563	DDX39B	DX39B_HUMAN	Q13838	A_32_P36192	-0.41465	12.6214	-2.99	0.00871735	0.442553	1
ENSG00000237889	-	-	-	A_32_P36192	-0.41465	12.6214	-2.99	0.00871735	0.442553	1
ENSG00000229496	DDX39B	DX39B_HUMAN	Q13838	A_32_P36192	-0.41465	12.6214	-2.99	0.00871735	0.442553	1
ENSG00000225073	DDX39B	DX39B_HUMAN	Q13838	A_32_P36192	-0.41465	12.6214	-2.99	0.00871735	0.442553	1
ENSG00000230624	DDX39B	DX39B_HUMAN	Q13838	A_32_P36192	-0.41465	12.6214	-2.99	0.00871735	0.442553	1
ENSG00000215425	DDX39B	DX39B_HUMAN	Q13838	A_32_P36192	-0.41465	12.6214	-2.99	0.00871735	0.442553	1
ENSG00000254899	-	-	-	A_32_P36192	-0.41465	12.6214	-2.99	0.00871735	0.442553	1
ENSG00000235439	DDX39B	DX39B_HUMAN	Q13838	A_32_P36192	-0.41465	12.6214	-2.99	0.00871735	0.442553	1
ENSG00000117877	CD3EAP	RPA34_HUMAN	O15446	A_24_P267452	-0.388003	9.8981	-2.98949	0.00872662	0.442553	1
ENSG00000127824	TUBA4A	TBA4A_HUMAN	P68366	A_23_P84448	-0.306152	9.28875	-2.98903	0.00873504	0.442553	1
ENSG00000243910	-	-	-	A_23_P84448	-0.306152	9.28875	-2.98903	0.00873504	0.442553	1
ENSG00000145287	PLAC8	PLAC8_HUMAN	Q9NZF1	A_23_P81219	0.376373	8.312	2.98888	0.00873782	0.442553	1
ENSG00000116774	OLFML3	OLFL3_HUMAN	Q9NRN5	A_24_P11315	-0.428643	8.91791	-2.98849	0.00874483	0.442553	1
ENSG00000163349	HIPK1	HIPK1_HUMAN	Q86Z02	A_24_P11315	-0.428643	8.91791	-2.98849	0.00874483	0.442553	1
ENSG00000243749	ZMYM6NB	ZMYNB_HUMAN	Q8NCS4	A_24_P370670	0.262483	11.5924	2.9876	0.00876107	0.442553	1
ENSG00000271741	-	-	-	A_24_P370670	0.262483	11.5924	2.9876	0.00876107	0.442553	1
ENSG00000183023	SLC8A1	NAC1_HUMAN	P32418	A_24_P136866	0.246218	7.54373	2.98727	0.00876708	0.442553	1
ENSG00000033800	PIAS1	PIAS1_HUMAN	O75925	A_23_P163353	-0.220995	8.8081	-2.98643	0.00878238	0.442553	1
ENSG00000173193	PARP14	PAR14_HUMAN	Q460N5	A_24_P161018	-0.271402	7.92587	-2.98444	0.00881872	0.442553	1
ENSG00000146938	NLGN4X	NLGNX_HUMAN	Q8N0W4	A_23_P364592	-0.357524	8.99965	-2.98345	0.00883687	0.442553	1
ENSG00000101639	CEP192	CE192_HUMAN	Q8TEP8	A_23_P89710	0.303198	10.6382	2.98279	0.0088491	0.442553	1
ENSG00000230438	-	-	-	A_32_P183918	0.302958	7.08492	2.98204	0.00886292	0.442553	1
ENSG00000105538	RASIP1	RAIN_HUMAN	Q5U651	A_23_P119353	-0.262492	9.87678	-2.98152	0.00887246	0.442553	1
ENSG00000138780	GSTCD	GSTCD_HUMAN	Q8NEC7	A_23_P213038	-0.223916	8.44229	-2.9811	0.00888012	0.442553	1
ENSG00000088386	SLC15A1	S15A1_HUMAN	P46059	A_23_P128609	-0.322451	7.08239	-2.9811	0.00888022	0.442553	1
ENSG00000088386	hPEPT1-RF	S15A1_HUMAN	P46059	A_23_P128609	-0.322451	7.08239	-2.9811	0.00888022	0.442553	1
ENSG00000154582	TCEB1	ELOC_HUMAN	Q15369	A_24_P243881	0.224652	9.40006	2.9792	0.00891539	0.442553	1
ENSG00000168404	MLKL	MLKL_HUMAN	Q8NB16	A_23_P61050	-0.282426	7.39428	-2.97805	0.00893657	0.442553	1
ENSG00000134046	MBD2	MBD2_HUMAN	Q9UBB5	A_24_P119201	0.212308	12.4848	2.978	0.00893761	0.442553	1
ENSG00000109270	LAMTOR3	LTOR3_HUMAN	Q9UHA4	A_32_P10311	0.254772	8.20017	2.97794	0.00893872	0.442553	1
ENSG00000211938	-	-	-	A_32_P51988	-0.354834	6.8711	-2.97667	0.00896231	0.443187	1
ENSG00000211896	IGHG1	IGHG1_HUMAN	P01857	A_32_P51988	-0.354834	6.8711	-2.97667	0.00896231	0.443187	1
ENSG00000254056	-	-	-	A_32_P51988	-0.354834	6.8711	-2.97667	0.00896231	0.443187	1
ENSG00000211967	IGHV3-53	-	-	A_32_P51988	-0.354834	6.8711	-2.97667	0.00896231	0.443187	1
ENSG00000108312	UBTF	UBF1_HUMAN	P17480	A_23_P100779	-0.223778	8.83449	-2.97402	0.00901182	0.444771	1
ENSG00000225484	-	-	-	A_24_P611903	0.270257	10.0623	2.97326	0.00902602	0.444771	1
ENSG00000236493	-	-	-	A_24_P169593	0.341601	7.88009	2.97322	0.00902681	0.444771	1
ENSG00000255515	-	-	-	A_24_P84401	0.294339	7.50027	2.97184	0.00905277	0.445515	1
ENSG00000010404	IDS	IDS_HUMAN	P22304	A_32_P38345	0.277439	7.11044	2.97078	0.00907271	0.445521	1
ENSG00000155506	LARP1	LARP1_HUMAN	Q6PKG0	A_23_P392383	-0.220661	9.79489	-2.97032	0.0090813	0.445521	1
ENSG00000235118	-	-	-	A_24_P783008	0.331195	7.10928	2.96916	0.00910321	0.445521	1
ENSG00000105829	BET1	BET1_HUMAN	O15155	A_24_P269432	0.257832	9.85042	2.96906	0.0091052	0.445521	1
ENSG00000105829	DKFZp781C0425	BET1_HUMAN	O15155	A_24_P269432	0.257832	9.85042	2.96906	0.0091052	0.445521	1
ENSG00000182150	ERCC6L2	ER6L2_HUMAN	Q5T890	A_23_P424269	-0.227067	8.4217	-2.96794	0.00912636	0.445521	1
ENSG00000075213	SEMA3A	SEM3A_HUMAN	Q14563	A_23_P317591	-0.25833	10.6785	-2.96741	0.00913633	0.445521	1
ENSG00000086730	LAT2	NTAL_HUMAN	Q9GZY6	A_24_P940327	-0.270725	6.92468	-2.96717	0.00914084	0.445521	1
ENSG00000086570	FAT2	FAT2_HUMAN	Q9NYQ8	A_23_P81507	0.258636	7.34078	2.96574	0.00916809	0.445521	1
ENSG00000080603	SRCAP	SRCAP_HUMAN	Q6ZRS2	A_24_P941279	-0.21605	7.86494	-2.96533	0.00917585	0.445521	1
ENSG00000100422	CERK	CERK1_HUMAN	Q8TCT0	A_24_P62237	-0.26643	10.8607	-2.96513	0.00917977	0.445521	1
ENSG00000145063	-	-	-	A_32_P161751	0.242009	6.94438	2.96471	0.00918771	0.445521	1
ENSG00000175556	LONRF3	LONF3_HUMAN	Q496Y0	A_24_P297302	-0.282714	7.00057	-2.96417	0.00919812	0.445521	1
ENSG00000175505	CLCF1	CLCF1_HUMAN	Q9UBD9	A_23_P138760	0.215607	8.06964	2.9632	0.00921655	0.445521	1
ENSG00000174448	STARD6	STAR6_HUMAN	P59095	A_23_P378427	0.206383	6.91539	2.96269	0.00922634	0.445521	1
ENSG00000203661	OR2T5	OR2T5_HUMAN	Q6IEZ7	A_23_P12373	-0.265929	6.90109	-2.95946	0.00928834	0.447405	1
ENSG00000182783	OR2T29	O2T29_HUMAN	Q8NH02	A_23_P12373	-0.265929	6.90109	-2.95946	0.00928834	0.447405	1
ENSG00000140263	SORD	DHSO_HUMAN	Q00796	A_32_P89691	-0.393143	9.94522	-2.95819	0.00931295	0.447405	1
ENSG00000259479	-	-	-	A_32_P89691	-0.393143	9.94522	-2.95819	0.00931295	0.447405	1
ENSG00000173621	LRFN4	LRFN4_HUMAN	Q6PJG9	A_23_P63980	-0.265343	11.2886	-2.95633	0.00934896	0.447405	1
ENSG00000110841	PPFIBP1	LIPB1_HUMAN	Q86W92	A_23_P373724	0.25514	11.1517	2.9557	0.00936115	0.447405	1
ENSG00000182722	-	-	-	A_24_P118452	-0.308931	10.266	-2.95569	0.00936138	0.447405	1
ENSG00000176723	ZNF843	ZN843_HUMAN	Q8N446	A_24_P161144	0.207069	7.92346	2.95559	0.0093634	0.447405	1
ENSG00000111913	FAM65B	FA65B_HUMAN	Q9Y4F9	A_23_P358394	-0.26695	8.22739	-2.95441	0.00938634	0.447405	1
ENSG00000162745	OLFML2B	OLM2B_HUMAN	Q68BL8	A_24_P248345	0.268158	7.10263	2.9521	0.00943133	0.447405	1
ENSG00000277264	-	-	-	A_23_P8095	-0.321516	13.1202	-2.95158	0.00944159	0.447405	1
ENSG00000253570	-	-	-	A_23_P8095	-0.321516	13.1202	-2.95158	0.00944159	0.447405	1
ENSG00000204308	RNF5	RNF5_HUMAN	Q99942	A_23_P8095	-0.321516	13.1202	-2.95158	0.00944159	0.447405	1
ENSG00000258610	-	-	-	A_23_P77000	0.314248	10.6919	2.95052	0.0094624	0.447405	1
ENSG00000071246	VASH1	VASH1_HUMAN	Q7L8A9	A_23_P77000	0.314248	10.6919	2.95052	0.0094624	0.447405	1
ENSG00000170537	TMC7	TMC7_HUMAN	Q7Z402	A_23_P140928	0.243326	8.69674	2.94907	0.0094909	0.447405	1
ENSG00000145012	LPP	LPP_HUMAN	Q93052	A_24_P916515	-0.289368	7.09099	-2.94837	0.0095047	0.447405	1
ENSG00000164430	MB21D1	CGAS_HUMAN	Q8N884	A_32_P1173	-0.311828	8.0742	-2.94815	0.00950897	0.447405	1
ENSG00000103222	ABCC1	MRP1_HUMAN	P33527	A_24_P227831	-0.242482	8.75164	-2.94812	0.00950964	0.447405	1
ENSG00000154310	TNIK	-	-	A_23_P135568	-0.514985	9.5304	-2.94784	0.00951515	0.447405	1
ENSG00000173253	DMRT2	DMRT2_HUMAN	Q9Y5R5	A_32_P213459	-0.254233	6.9913	-2.94761	0.00951975	0.447405	1
ENSG00000196511	TPK1	TPK1_HUMAN	Q9H3S4	A_23_P145957	0.335213	10.7608	2.94747	0.00952245	0.447405	1
ENSG00000273820	USP27X	UBP27_HUMAN	A6NNY8	A_24_P322908	0.20946	8.87986	2.94739	0.00952407	0.447405	1
ENSG00000137574	TGS1	TGS1_HUMAN	Q96RS0	A_23_P60899	-0.2086	8.41061	-2.94622	0.00954721	0.447405	1
ENSG00000164091	WDR82	WDR82_HUMAN	Q6UXN9	A_23_P109877	-0.233564	10.1429	-2.94575	0.00955642	0.447405	1
ENSG00000183432	-	-	-	A_24_P143843	0.286482	8.37735	2.94478	0.00957568	0.447405	1
ENSG00000176485	PLA2G16	HRSL3_HUMAN	P53816	A_23_P116414	-0.293638	13.4996	-2.94448	0.00958173	0.447405	1
ENSG00000279608	-	-	-	A_24_P144082	0.269804	7.02384	2.94427	0.00958592	0.447405	1
ENSG00000070831	CDC42	CDC42_HUMAN	P60953	A_23_P200560	0.236251	13.7582	2.94399	0.00959138	0.447405	1
ENSG00000138757	G3BP2	G3BP2_HUMAN	Q9UN86	A_23_P41255	-0.256025	10.1903	-2.94389	0.00959339	0.447405	1
ENSG00000148834	GSTO1	GSTO1_HUMAN	P78417	A_24_P304051	0.230995	14.0519	2.94111	0.00964899	0.448429	1
ENSG00000142149	HUNK	HUNK_HUMAN	P57058	A_24_P160070	0.240199	7.04429	2.94053	0.00966057	0.448429	1
ENSG00000115423	DNAH6	DYH6_HUMAN	Q9C0G6	A_24_P231074	0.362841	7.03763	2.93998	0.00967156	0.448429	1
ENSG00000188157	AGRN	AGRIN_HUMAN	O00468	A_23_P343411	-0.283224	12.5707	-2.93986	0.00967404	0.448429	1
ENSG00000102539	MLNR	MTLR_HUMAN	O43193	A_23_P36905	-0.262784	6.95902	-2.93696	0.00973236	0.448429	1
ENSG00000213790	-	-	-	A_23_P28420	-0.291097	11.4212	-2.93661	0.00973932	0.448429	1
ENSG00000138430	OLA1	OLA1_HUMAN	Q9NTK5	A_23_P28420	-0.291097	11.4212	-2.93661	0.00973932	0.448429	1
ENSG00000259781	-	-	-	A_32_P134580	-0.287588	13.8661	-2.9365	0.00974167	0.448429	1
ENSG00000189403	HMGB1	HMGB1_HUMAN	P09429	A_32_P134580	-0.287588	13.8661	-2.9365	0.00974167	0.448429	1
ENSG00000275029	-	-	-	A_32_P134580	-0.287588	13.8661	-2.9365	0.00974167	0.448429	1
ENSG00000213707	-	-	-	A_32_P134580	-0.287588	13.8661	-2.9365	0.00974167	0.448429	1
ENSG00000132967	-	-	-	A_32_P134580	-0.287588	13.8661	-2.9365	0.00974167	0.448429	1
ENSG00000121691	CAT	CATA_HUMAN	P04040	A_23_P105138	-0.262336	7.96282	-2.93556	0.00976061	0.448429	1
ENSG00000160131	VMA21	VMA21_HUMAN	Q3ZAQ7	A_32_P151621	-0.261503	8.48383	-2.93552	0.00976139	0.448429	1
ENSG00000250786	-	-	-	A_24_P639671	0.270324	10.9081	2.93522	0.00976754	0.448429	1
ENSG00000102048	ASB9	ASB9_HUMAN	Q96DX5	A_23_P125643	-0.207139	7.26859	-2.93487	0.00977465	0.448429	1
ENSG00000009765	IYD	IYD1_HUMAN	Q6PHW0	A_32_P110472	0.338246	7.00649	2.93468	0.00977852	0.448429	1
ENSG00000141858	SAMD1	-	-	A_23_P435941	-0.260633	9.57076	-2.93374	0.00979757	0.448429	1
ENSG00000260318	-	-	-	A_24_P928017	0.315791	10.3658	2.93299	0.00981269	0.448429	1
ENSG00000160584	SIK3	SIK3_HUMAN	Q9Y2K2	A_24_P329924	0.291747	9.24884	2.93251	0.00982257	0.448429	1
ENSG00000146457	WTAP	FL2D_HUMAN	Q15007	A_23_P215037	0.230758	11.4261	2.93159	0.00984135	0.448429	1
ENSG00000232702	-	-	-	A_23_P215037	0.230758	11.4261	2.93159	0.00984135	0.448429	1
ENSG00000082438	COBLL1	COBL1_HUMAN	Q53SF7	A_24_P915926	0.242344	6.9825	2.93098	0.00985371	0.448429	1
ENSG00000124172	ATP5E	ATP5E_HUMAN	P56381	A_32_P123771	0.239239	12.9064	2.93092	0.00985502	0.448429	1
ENSG00000180389	ATP5EP2	AT5EL_HUMAN	Q5VTU8	A_32_P123771	0.239239	12.9064	2.93092	0.00985502	0.448429	1
ENSG00000150773	PIH1D2	PIHD2_HUMAN	Q8WWB5	A_23_P418451	0.218356	8.15031	2.93087	0.00985594	0.448429	1
ENSG00000164649	CDCA7L	CDA7L_HUMAN	Q96GN5	A_24_P274795	-0.420331	10.9081	-2.93028	0.00986815	0.448429	1
ENSG00000132669	RIN2	RIN2_HUMAN	Q8WYP3	A_23_P120572	0.211828	7.25317	2.92911	0.00989204	0.448429	1
ENSG00000224965	-	-	-	A_32_P159126	0.262488	7.03314	2.92729	0.00992943	0.448429	1
ENSG00000120910	PPP3CC	PP2BC_HUMAN	P48454	A_23_P157495	0.318001	9.52593	2.92675	0.00994047	0.448429	1
ENSG00000182963	DKFZp686P0738	CXG1_HUMAN	P36383	A_23_P428287	-0.358745	9.96652	-2.92668	0.00994192	0.448429	1
ENSG00000182963	GJC1	CXG1_HUMAN	P36383	A_23_P428287	-0.358745	9.96652	-2.92668	0.00994192	0.448429	1
ENSG00000213050	-	-	-	A_24_P84924	0.2892	7.20367	2.92551	0.00996601	0.448429	1
ENSG00000072110	ACTN1	ACTN1_HUMAN	P12814	A_23_P105957	-0.292191	13.1318	-2.92401	0.00999714	0.448429	1
ENSG00000033867	SLC4A7	S4A7_HUMAN	Q9Y6M7	A_24_P362931	-0.297398	9.37969	-2.92134	0.0100527	0.448429	1
ENSG00000164066	INTU	INTU_HUMAN	Q9ULD6	A_32_P36582	0.239703	9.6374	2.92043	0.0100716	0.448429	1
ENSG00000196369	SRGAP2B	SRG2B_HUMAN	P0DMP2	A_32_P212024	0.374361	10.4728	2.91996	0.0100813	0.448429	1
ENSG00000171943	SRGAP2C	SRG2C_HUMAN	P0DJJ0	A_32_P212024	0.374361	10.4728	2.91996	0.0100813	0.448429	1
ENSG00000156920	GPR112	GP112_HUMAN	Q8IZF6	A_23_P312901	-0.271974	6.99556	-2.91943	0.0100925	0.448429	1
ENSG00000116774	OLFML3	OLFL3_HUMAN	Q9NRN5	A_32_P24832	-0.342996	9.33377	-2.91884	0.0101047	0.448429	1
ENSG00000163349	HIPK1	HIPK1_HUMAN	Q86Z02	A_32_P24832	-0.342996	9.33377	-2.91884	0.0101047	0.448429	1
ENSG00000089116	LHX5	LHX5_HUMAN	Q9H2C1	A_23_P47967	-0.281153	6.99463	-2.91878	0.0101061	0.448429	1
ENSG00000271869	-	-	-	A_32_P190802	0.199292	8.11546	2.91828	0.0101165	0.448429	1
ENSG00000255647	-	-	-	A_32_P832001	0.254152	7.11054	2.91809	0.0101204	0.448429	1
ENSG00000130813	C19orf66	CS066_HUMAN	Q9NUL5	A_24_P236949	-0.247645	7.58878	-2.9179	0.0101246	0.448429	1
ENSG00000159131	GART	PUR2_HUMAN	P22102	A_24_P301846	-0.244081	9.83433	-2.91702	0.0101429	0.448429	1
ENSG00000119922	IFIT2	IFIT2_HUMAN	P09913	A_23_P24004	-0.228611	7.16045	-2.9168	0.0101475	0.448429	1
ENSG00000213465	ARL2	ARL2_HUMAN	P36404	A_23_P98252	-0.235027	12.2511	-2.91677	0.0101483	0.448429	1
ENSG00000182195	LDOC1	LDOC1_HUMAN	O95751	A_23_P114105	-0.277196	9.21167	-2.9166	0.0101519	0.448429	1
ENSG00000139946	PELI2	PELI2_HUMAN	Q9HAT8	A_23_P65532	-0.338891	8.49582	-2.91622	0.0101597	0.448429	1
ENSG00000116044	NFE2L2	NF2L2_HUMAN	Q16236	A_23_P5761	0.228167	11.7088	2.91619	0.0101604	0.448429	1
ENSG00000182218	HHIPL1	HIPL1_HUMAN	Q96JK4	A_24_P127491	-0.199588	7.2898	-2.91611	0.0101621	0.448429	1
ENSG00000245694	-	-	-	A_32_P104063	0.289032	11.341	2.91607	0.0101629	0.448429	1
ENSG00000035403	VCL	VINC_HUMAN	P18206	A_24_P47182	-0.418302	14.0162	-2.91576	0.0101696	0.448429	1
ENSG00000196368	NUDT11	NUD11_HUMAN	Q96G61	A_24_P345002	-0.234803	8.51271	-2.91405	0.0102055	0.448429	1
ENSG00000123560	PLP1	MYPR_HUMAN	P60201	A_23_P85201	-0.310872	7.99753	-2.91355	0.0102162	0.448429	1
ENSG00000204599	TRIM39	TRI39_HUMAN	Q9HCM9	A_24_P89413	0.217776	9.98179	2.91349	0.0102175	0.448429	1
ENSG00000125818	PSMF1	PSMF1_HUMAN	Q92530	A_24_P122050	-0.224996	9.89572	-2.91332	0.0102211	0.448429	1
ENSG00000152284	TCF7L1	TF7L1_HUMAN	Q9HCS4	A_23_P142872	-0.438516	12.1645	-2.91315	0.0102245	0.448429	1
ENSG00000128609	NDUFA5	NDUA5_HUMAN	Q16718	A_23_P412041	0.225308	7.02663	2.91216	0.0102456	0.448429	1
ENSG00000130517	PGPEP1	PGPI_HUMAN	Q9NXJ5	A_23_P327370	-0.273749	9.27679	-2.91111	0.0102679	0.448429	1
ENSG00000196468	FGF16	FGF16_HUMAN	O43320	A_23_P254896	-0.331642	7.55412	-2.91097	0.0102709	0.448429	1
ENSG00000153982	GDPD1	GDPD1_HUMAN	Q8N9F7	A_24_P920730	0.310713	9.01442	2.90998	0.010292	0.448429	1
ENSG00000143515	ATP8B2	AT8B2_HUMAN	P98198	A_24_P117896	-0.293737	8.31655	-2.9096	0.0103001	0.448429	1
ENSG00000171135	JAGN1	JAGN1_HUMAN	Q8N5M9	A_23_P6762	0.200455	12.9677	2.90913	0.0103101	0.448429	1
ENSG00000119699	TGFB3	TGFB3_HUMAN	P10600	A_23_P88404	0.250686	7.5057	2.9077	0.0103407	0.448429	1
ENSG00000274211	SOCS7	SOCS7_HUMAN	O14512	A_32_P43711	-0.217079	7.38368	-2.90757	0.0103435	0.448429	1
ENSG00000185652	NTF3	NTF3_HUMAN	P20783	A_23_P360797	0.22644	8.42658	2.90672	0.0103617	0.448429	1
ENSG00000163959	SLC51A	OSTA_HUMAN	Q86UW1	A_23_P40761	-0.286491	7.54831	-2.90647	0.0103669	0.448429	1
ENSG00000113657	DPYSL3	DPYL3_HUMAN	Q14195	A_24_P149036	-0.269385	13.6676	-2.90549	0.010388	0.448841	1
ENSG00000099139	PCSK5	PCSK5_HUMAN	Q92824	A_23_P257003	-0.51663	10.3426	-2.90502	0.0103983	0.448841	1
ENSG00000185019	UBOX5	RNF37_HUMAN	O94941	A_24_P79241	0.19597	9.24968	2.90345	0.0104321	0.449358	1
ENSG00000114573	ATP6V1A	VATA_HUMAN	P38606	A_23_P211965	-0.244218	9.61963	-2.9018	0.0104677	0.450238	1
ENSG00000112245	PTP4A1	TP4A1_HUMAN	Q93096	A_24_P252043	-0.21669	8.16593	-2.90085	0.0104882	0.450358	1
ENSG00000237289	CKMT1A	KCRU_HUMAN	P12532	A_23_P163235	-0.356127	9.17513	-2.9002	0.0105025	0.450502	1
ENSG00000237289	CKMT1B	KCRU_HUMAN	P12532	A_23_P163235	-0.356127	9.17513	-2.9002	0.0105025	0.450502	1
ENSG00000223572	CKMT1A	KCRU_HUMAN	P12532	A_23_P163235	-0.356127	9.17513	-2.9002	0.0105025	0.450502	1
ENSG00000223572	CKMT1B	KCRU_HUMAN	P12532	A_23_P163235	-0.356127	9.17513	-2.9002	0.0105025	0.450502	1
ENSG00000112115	IL17A	IL17_HUMAN	Q16552	A_23_P332820	0.268544	6.97735	2.89904	0.0105278	0.450656	1
ENSG00000278976	-	-	-	A_23_P407203	0.245671	6.91542	2.89902	0.0105281	0.450656	1
ENSG00000169554	ZEB2	ZEB2_HUMAN	O60315	A_23_P407203	0.245671	6.91542	2.89902	0.0105281	0.450656	1
ENSG00000164253	WDR41	WDR41_HUMAN	Q9HAD4	A_23_P259521	0.245588	10.317	2.89815	0.010547	0.450998	1
ENSG00000106991	ENG	EGLN_HUMAN	P17813	A_23_P83328	-0.293462	7.34527	-2.89686	0.0105753	0.451737	1
ENSG00000164171	ITGA2	ITA2_HUMAN	P17301	A_32_P208076	-0.23794	7.82436	-2.89548	0.0106055	0.452164	1
ENSG00000259780	-	-	-	A_24_P205100	-0.312645	7.09016	-2.8954	0.0106073	0.452164	1
ENSG00000038219	BOD1L1	BD1L1_HUMAN	Q8NFC6	A_24_P931476	0.205866	8.61554	2.89356	0.0106477	0.453417	1
ENSG00000129354	AP1M2	AP1M2_HUMAN	Q9Y6Q5	A_23_P78543	-0.336711	10.9109	-2.89269	0.0106668	0.45376	1
ENSG00000106638	TBL2	TBL2_HUMAN	Q9Y4P3	A_23_P134395	0.205112	12.5944	2.89054	0.0107145	0.455316	1
ENSG00000135899	SP110	SP110_HUMAN	Q9HB58	A_23_P120002	-0.29454	7.93871	-2.88985	0.0107297	0.455492	1
ENSG00000184588	PDE4B	PDE4B_HUMAN	Q07343	A_24_P325333	-0.277274	7.39261	-2.88864	0.0107568	0.456169	1
ENSG00000151748	SAV1	SAV1_HUMAN	Q9H4B6	A_23_P65555	-0.240013	9.33314	-2.88756	0.0107807	0.456713	1
ENSG00000205730	ITPRIPL2	IPIL2_HUMAN	Q3MIP1	A_24_P835500	0.332472	9.82896	2.88623	0.0108104	0.456906	1
ENSG00000126549	STATH	STAT_HUMAN	P02808	A_23_P252253	-0.219567	6.88522	-2.88528	0.0108317	0.456906	1
ENSG00000125508	SRMS	SRMS_HUMAN	Q9H3Y6	A_23_P68380	-0.273421	6.8684	-2.88487	0.0108409	0.456906	1
ENSG00000204209	DAXX	DAXX_HUMAN	Q9UER7	A_23_P122579	-0.249317	10.5741	-2.88116	0.0109244	0.459014	1
ENSG00000253679	-	-	-	A_32_P108986	0.237236	7.20708	2.87979	0.0109552	0.459782	1
ENSG00000111752	PHC1	PHC1_HUMAN	P78364	A_23_P323094	-0.445534	9.35975	-2.87936	0.010965	0.459782	1
ENSG00000179899	-	-	-	A_23_P323094	-0.445534	9.35975	-2.87936	0.010965	0.459782	1
ENSG00000224309	-	-	-	A_23_P321496	0.216045	7.14938	2.87873	0.0109794	0.459914	1
ENSG00000166426	CRABP1	RABP1_HUMAN	P29762	A_23_P117882	-0.367354	12.1819	-2.87762	0.0110046	0.460043	1
ENSG00000095794	CREM	CREM_HUMAN	Q03060	A_24_P171075	0.264415	11.4427	2.87761	0.0110049	0.460043	1
ENSG00000183654	40603	MARHB_HUMAN	A6NNE9	A_24_P33508	0.281	10.1683	2.87661	0.0110276	0.460432	1
ENSG00000104228	TRIM35	TRI35_HUMAN	Q9UPQ4	A_24_P12651	0.44805	10.2201	2.87622	0.0110366	0.460432	1
ENSG00000102312	PORCN	PORCN_HUMAN	Q9H237	A_23_P11071	0.280503	14.647	2.87406	0.0110857	0.461436	1
ENSG00000147155	EBP	EBP_HUMAN	Q15125	A_23_P11071	0.280503	14.647	2.87406	0.0110857	0.461436	1
ENSG00000100441	KHNYN	KHNYN_HUMAN	O15037	A_24_P205268	0.284533	10.9679	2.87349	0.0110989	0.461436	1
ENSG00000180304	OAZ2	OAZ2_HUMAN	O95190	A_23_P106463	-0.262504	12.4564	-2.87313	0.0111071	0.461436	1
ENSG00000110955	ATP5B	ATPB_HUMAN	P06576	A_23_P33216	-0.268407	14.7384	-2.8727	0.011117	0.461436	1
ENSG00000131016	AKAP12	AKA12_HUMAN	Q02952	A_23_P111311	-0.199709	8.0645	-2.87222	0.011128	0.461436	1
ENSG00000274145	RILP	RILP_HUMAN	Q96NA2	A_24_P185117	-0.230364	8.70196	-2.87054	0.0111667	0.461723	1
ENSG00000167705	RILP	RILP_HUMAN	Q96NA2	A_24_P185117	-0.230364	8.70196	-2.87054	0.0111667	0.461723	1
ENSG00000104970	KIR3DX1	KI3X1_HUMAN	Q9H7L2	A_23_P398943	0.253642	7.01155	2.87046	0.0111686	0.461723	1
ENSG00000198798	MAGEB3	MAGB3_HUMAN	O15480	A_23_P96432	-0.233009	7.05558	-2.86924	0.0111967	0.46242	1
ENSG00000155249	OR4K1	OR4K1_HUMAN	Q8NGD4	A_23_P2973	-0.281162	7.02612	-2.86817	0.0112216	0.46291	1
ENSG00000147121	KRBOX4	KRBX4_HUMAN	Q5JUW0	A_24_P168822	0.191536	8.36213	2.86676	0.0112544	0.46291	1
ENSG00000151876	FBXO4	FBX4_HUMAN	Q9UKT5	A_24_P171873	0.215204	7.27248	2.86624	0.0112664	0.46291	1
ENSG00000049759	NEDD4L	NED4L_HUMAN	Q96PU5	A_23_P27279	-0.244395	11.0169	-2.86481	0.0112997	0.46291	1
ENSG00000175877	WBSCR28	WBS28_HUMAN	Q6UE05	A_23_P418274	-0.229481	7.01512	-2.86468	0.0113029	0.46291	1
ENSG00000084754	HADHA	ECHA_HUMAN	P40939	A_24_P353964	-0.275383	8.89806	-2.86337	0.0113334	0.46291	1
ENSG00000255302	EID1	EID1_HUMAN	Q9Y6B2	A_23_P54283	-0.221276	13.3045	-2.86299	0.0113424	0.46291	1
ENSG00000120332	TNN	-	-	A_32_P480177	-0.211605	7.04897	-2.86214	0.0113622	0.46291	1
ENSG00000235501	-	-	-	A_32_P117026	-0.300269	7.81325	-2.86209	0.0113633	0.46291	1
ENSG00000147596	PRDM14	PRD14_HUMAN	Q9GZV8	A_23_P123488	-0.480382	8.05835	-2.86197	0.0113663	0.46291	1
ENSG00000256315	-	-	-	A_32_P70129	0.254202	7.14681	2.86187	0.0113686	0.46291	1
ENSG00000268034	-	-	-	A_32_P162338	-0.250773	12.9433	-2.86173	0.0113718	0.46291	1
ENSG00000143549	TPM3	TPM3_HUMAN	P06753	A_32_P162338	-0.250773	12.9433	-2.86173	0.0113718	0.46291	1
ENSG00000261279	-	-	-	A_32_P203786	-0.201931	7.62486	-2.8612	0.0113843	0.46291	1
ENSG00000215304	-	-	-	A_32_P203786	-0.201931	7.62486	-2.8612	0.0113843	0.46291	1
ENSG00000178081	-	-	-	A_32_P203786	-0.201931	7.62486	-2.8612	0.0113843	0.46291	1
ENSG00000260128	-	-	-	A_32_P203786	-0.201931	7.62486	-2.8612	0.0113843	0.46291	1
ENSG00000075407	ZNF37A	ZN37A_HUMAN	P17032	A_24_P239668	0.207624	7.11974	2.85982	0.0114168	0.46291	1
ENSG00000157021	-	-	-	A_32_P176675	0.259292	9.21444	2.85942	0.0114263	0.46291	1
ENSG00000102349	KLF8	KLF8_HUMAN	O95600	A_24_P937159	0.268708	10.4865	2.85891	0.0114382	0.46291	1
ENSG00000101935	AMMECR1	AMMR1_HUMAN	Q9Y4X0	A_24_P823011	0.295705	8.34978	2.85848	0.0114485	0.46291	1
ENSG00000177233	-	-	-	A_32_P310503	-0.324335	6.93444	-2.85827	0.0114533	0.46291	1
ENSG00000158023	WDR66	WDR66_HUMAN	Q8TBY9	A_32_P804837	-0.328109	6.98862	-2.85785	0.0114634	0.46291	1
ENSG00000214042	IFNA7	IFNA7_HUMAN	P01567	A_23_P157920	-0.265097	6.93192	-2.8573	0.0114763	0.46291	1
ENSG00000017427	IGF-I	IGF1_HUMAN	P05019	A_24_P304423	0.345312	7.04417	2.85485	0.0115346	0.46291	1
ENSG00000017427	IGF1	IGF1_HUMAN	P05019	A_24_P304423	0.345312	7.04417	2.85485	0.0115346	0.46291	1
ENSG00000184905	TCEAL2	TCAL2_HUMAN	Q9H3H9	A_23_P85140	-0.278481	9.74566	-2.85413	0.0115516	0.46291	1
ENSG00000107164	FUBP3	FUBP3_HUMAN	Q96I24	A_23_P435833	-0.261597	7.74559	-2.85373	0.0115613	0.46291	1
ENSG00000257017	HP	HPT_HUMAN	P00738	A_23_P206760	0.451973	10.543	2.85318	0.0115745	0.46291	1
ENSG00000261701	HPR	HPTR_HUMAN	P00739	A_23_P206760	0.451973	10.543	2.85318	0.0115745	0.46291	1
ENSG00000259489	-	-	-	A_24_P332595	0.370486	8.55988	2.85157	0.011613	0.46291	1
ENSG00000130475	FCHO1	FCHO1_HUMAN	O14526	A_32_P459533	-0.271425	9.05815	-2.85152	0.0116142	0.46291	1
ENSG00000198054	DSCR8	DSCR8_HUMAN	Q96T75	A_23_P6252	-0.264476	6.99611	-2.84996	0.0116516	0.46291	1
ENSG00000123594	ATXN3L	ATX3L_HUMAN	Q9H3M9	A_23_P361744	-0.291291	7.04652	-2.84951	0.0116623	0.46291	1
ENSG00000170525	PFKFB3	F263_HUMAN	Q16875	A_24_P111096	0.255268	7.23129	2.84828	0.0116919	0.46291	1
ENSG00000229043	-	-	-	A_32_P8396	0.197069	7.70515	2.84712	0.0117201	0.46291	1
ENSG00000237118	-	-	-	A_23_P89981	-0.215904	7.35512	-2.8471	0.0117206	0.46291	1
ENSG00000197446	CYP2F1	CP2F1_HUMAN	P24903	A_23_P89981	-0.215904	7.35512	-2.8471	0.0117206	0.46291	1
ENSG00000187608	ISG15	ISG15_HUMAN	P05161	A_23_P819	0.300869	13.5093	2.84685	0.0117267	0.46291	1
ENSG00000233527	-	-	-	A_24_P839298	0.204881	7.74081	2.84607	0.0117454	0.46291	1
ENSG00000136488	CSH1	CSH1_HUMAN	P0DML2	A_23_P207154	-0.388241	7.78313	-2.84529	0.0117644	0.46291	1
ENSG00000213218	CSH1	CSH2_HUMAN	P0DML3	A_23_P207154	-0.388241	7.78313	-2.84529	0.0117644	0.46291	1
ENSG00000213218	CSH2	CSH2_HUMAN	P0DML3	A_23_P207154	-0.388241	7.78313	-2.84529	0.0117644	0.46291	1
ENSG00000168040	FADD	FADD_HUMAN	Q13158	A_23_P86917	0.238014	14.3735	2.84515	0.0117677	0.46291	1
ENSG00000008056	SYN1	SYN1_HUMAN	P17600	A_23_P33847	-0.235209	7.57108	-2.8442	0.0117908	0.46291	1
ENSG00000237850	-	-	-	A_24_P50972	-0.242902	7.0401	-2.84401	0.0117955	0.46291	1
ENSG00000273976	GOLGA6L1	-	-	A_24_P50972	-0.242902	7.0401	-2.84401	0.0117955	0.46291	1
ENSG00000277322	GOLGA6L6	-	-	A_24_P50972	-0.242902	7.0401	-2.84401	0.0117955	0.46291	1
ENSG00000277865	-	-	-	A_24_P50972	-0.242902	7.0401	-2.84401	0.0117955	0.46291	1
ENSG00000227717	-	-	-	A_24_P50972	-0.242902	7.0401	-2.84401	0.0117955	0.46291	1
ENSG00000273756	-	-	-	A_24_P50972	-0.242902	7.0401	-2.84401	0.0117955	0.46291	1
ENSG00000184148	SPRR4	SPRR4_HUMAN	Q96PI1	A_23_P422018	-0.2699	6.96689	-2.84389	0.0117984	0.46291	1
ENSG00000260578	-	-	-	A_32_P4071	0.241909	6.95445	2.8429	0.0118225	0.46291	1
ENSG00000175206	NPPA	ANF_HUMAN	P01160	A_23_P74059	0.458903	8.1855	2.84247	0.0118331	0.46291	1
ENSG00000108622	ICAM2	ICAM2_HUMAN	P13598	A_23_P152655	0.300588	7.60576	2.8423	0.0118372	0.46291	1
ENSG00000135637	CCDC142	CC142_HUMAN	Q17RM4	A_23_P102258	0.21338	13.0334	2.84143	0.0118585	0.46291	1
ENSG00000204822	MRPL53	RM53_HUMAN	Q96EL3	A_23_P102258	0.21338	13.0334	2.84143	0.0118585	0.46291	1
ENSG00000137486	ARRB1	ARRB1_HUMAN	P49407	A_23_P203702	0.258567	11.5707	2.84062	0.0118783	0.46291	1
ENSG00000227507	LTB	TNFC_HUMAN	Q06643	A_23_P93348	0.220512	7.60543	2.84041	0.0118834	0.46291	1
ENSG00000153012	LGI2	LGI2_HUMAN	Q8N0V4	A_23_P7194	0.316283	10.7529	2.83898	0.0119185	0.46291	1
ENSG00000120306	CYSTM1	CYTM1_HUMAN	Q9H1C7	A_23_P259506	0.231435	11.9638	2.83839	0.011933	0.46291	1
ENSG00000228561	-	-	-	A_32_P167111	0.338593	7.08814	2.83809	0.0119404	0.46291	1
ENSG00000110958	PTGES3	TEBP_HUMAN	Q15185	A_24_P343869	-0.265049	11.7662	-2.8377	0.0119501	0.46291	1
ENSG00000104998	IL27RA	I27RA_HUMAN	Q6UWB1	A_24_P348326	0.2457	10.2807	2.83738	0.011958	0.46291	1
ENSG00000178279	TNP2	STP2_HUMAN	Q05952	A_23_P129382	-0.246094	7.23249	-2.83689	0.01197	0.46291	1
ENSG00000165821	SALL2	SALL2_HUMAN	Q9Y467	A_23_P48585	-0.257507	13.8037	-2.83665	0.0119759	0.46291	1
ENSG00000203734	ECT2L	ECT2L_HUMAN	Q008S8	A_24_P942346	-0.214068	6.941	-2.83525	0.0120105	0.46291	1
ENSG00000070182	SPTB	SPTB1_HUMAN	P11277	A_32_P134974	-0.276766	7.10582	-2.83329	0.0120591	0.46291	1
ENSG00000075239	ACAT1	THIL_HUMAN	P24752	A_24_P203678	-0.229958	9.03011	-2.83261	0.0120761	0.46291	1
ENSG00000154537	FAM27A	FAM27_HUMAN	Q5VT28	A_24_P342096	0.262919	8.61095	2.83246	0.0120799	0.46291	1
ENSG00000154537	FAM27B	FAM27_HUMAN	Q5VT28	A_24_P342096	0.262919	8.61095	2.83246	0.0120799	0.46291	1
ENSG00000154537	FAM27C	FAM27_HUMAN	Q5VT28	A_24_P342096	0.262919	8.61095	2.83246	0.0120799	0.46291	1
ENSG00000278763	-	-	-	A_24_P342096	0.262919	8.61095	2.83246	0.0120799	0.46291	1
ENSG00000064419	TNPO3	TNPO3_HUMAN	Q9Y5L0	A_23_P42563	-0.26166	9.48034	-2.83133	0.0121079	0.46291	1
ENSG00000244953	-	-	-	A_32_P12504	-0.223873	7.12861	-2.83126	0.0121097	0.46291	1
ENSG00000118515	DKFZp686H1615	SGK1_HUMAN	O00141	A_23_P19673	-0.434299	10.0555	-2.8312	0.0121113	0.46291	1
ENSG00000118515	SGK1	SGK1_HUMAN	O00141	A_23_P19673	-0.434299	10.0555	-2.8312	0.0121113	0.46291	1
ENSG00000083857	FAT1	FAT1_HUMAN	Q14517	A_23_P69586	-0.248783	10.1489	-2.83113	0.0121131	0.46291	1
ENSG00000279989	-	-	-	A_23_P304511	0.257789	8.15254	2.83058	0.0121267	0.46291	1
ENSG00000186812	ZNF397	ZN397_HUMAN	Q8NF99	A_23_P304511	0.257789	8.15254	2.83058	0.0121267	0.46291	1
ENSG00000271601	LIX1L	LIX1L_HUMAN	Q8IVB5	A_23_P342744	0.366232	9.41358	2.83051	0.0121284	0.46291	1
ENSG00000111817	DSE	DSE_HUMAN	Q9UL01	A_23_P19226	-0.297409	11.3753	-2.82979	0.0121464	0.46291	1
ENSG00000106025	TSPAN12	TSN12_HUMAN	O95859	A_23_P145984	0.237963	9.79426	2.82789	0.0121941	0.46291	1
ENSG00000280001	DDX3Y	DDX3Y_HUMAN	O15523	A_24_P130936	-0.270423	8.91216	-2.82753	0.0122032	0.46291	1
ENSG00000067048	DDX3Y	DDX3Y_HUMAN	O15523	A_24_P130936	-0.270423	8.91216	-2.82753	0.0122032	0.46291	1
ENSG00000214050	FBXO16	FBX16_HUMAN	Q8IX29	A_24_P128001	0.254293	11.5505	2.82716	0.0122125	0.46291	1
ENSG00000186918	ZNF395	ZN395_HUMAN	Q9H8N7	A_24_P128001	0.254293	11.5505	2.82716	0.0122125	0.46291	1
ENSG00000269741	KLK9	KLK9_HUMAN	Q9UKQ9	A_23_P369343	-0.338799	8.46546	-2.82712	0.0122136	0.46291	1
ENSG00000129455	KLK8	KLK8_HUMAN	O60259	A_23_P369343	-0.338799	8.46546	-2.82712	0.0122136	0.46291	1
ENSG00000165084	C8orf34	CH034_HUMAN	Q49A92	A_23_P73311	0.264358	8.69128	2.827	0.0122166	0.46291	1
ENSG00000258949	-	-	-	A_32_P14457	0.242685	7.0919	2.82675	0.0122228	0.46291	1
ENSG00000104738	MCM4	MCM4_HUMAN	P33991	A_23_P370989	-0.238217	10.8759	-2.82641	0.0122313	0.46291	1
ENSG00000010292	NCAPD2	CND1_HUMAN	Q15021	A_23_P25293	-0.320821	11.5304	-2.82598	0.0122423	0.46291	1
ENSG00000144063	MALL	MALL_HUMAN	Q13021	A_24_P80204	-0.21036	8.15445	-2.82589	0.0122444	0.46291	1
ENSG00000132938	MTUS2	MTUS2_HUMAN	Q5JR59	A_23_P334308	0.246611	8.19601	2.82571	0.0122491	0.46291	1
ENSG00000057935	MTA3	MTA3_HUMAN	Q9BTC8	A_23_P411431	0.272743	10.3924	2.82567	0.0122499	0.46291	1
ENSG00000123240	OPTN	OPTN_HUMAN	Q96CV9	A_23_P1461	0.216818	12.4055	2.82533	0.0122586	0.46291	1
ENSG00000225206	-	-	-	A_32_P107644	-0.335789	6.98483	-2.82502	0.0122665	0.46291	1
ENSG00000113580	NR3C1	GCR_HUMAN	P04150	A_23_P214059	0.218731	9.58528	2.82452	0.0122791	0.46291	1
ENSG00000216895	-	-	-	A_32_P13417	0.229623	8.10674	2.82443	0.0122815	0.46291	1
ENSG00000142192	APP	A4_HUMAN	P05067	A_24_P314159	-0.249422	11.2357	-2.82359	0.0123026	0.46291	1
ENSG00000105255	FSD1	FSD1_HUMAN	Q9BTV5	A_23_P153651	-0.231495	10.0679	-2.82273	0.0123245	0.46291	1
ENSG00000155506	LARP1	LARP1_HUMAN	Q6PKG0	A_24_P7211	-0.463632	8.99699	-2.82269	0.0123256	0.46291	1
ENSG00000178919	FOXE1	FOXE1_HUMAN	O00358	A_23_P216664	0.241396	7.25613	2.82258	0.0123283	0.46291	1
ENSG00000196230	TUBB	TBB5_HUMAN	P07437	A_23_P81912	-0.207469	14.503	-2.82227	0.0123362	0.46291	1
ENSG00000198829	SUCNR1	SUCR1_HUMAN	Q9BXA5	A_23_P69171	-0.27132	6.84718	-2.81971	0.0124015	0.46291	1
ENSG00000132688	NES	NEST_HUMAN	P48681	A_23_P103672	-0.344554	13.6756	-2.81908	0.0124176	0.46291	1
ENSG00000145331	TRMT10A	TM10A_HUMAN	Q8TBZ6	A_23_P398637	0.205925	8.66058	2.81875	0.012426	0.46291	1
ENSG00000124172	ATP5E	ATP5E_HUMAN	P56381	A_23_P252322	0.209406	16.6352	2.8181	0.0124427	0.46291	1
ENSG00000008294	SPAG9	JIP4_HUMAN	O60271	A_24_P365025	0.213374	10.8361	2.81752	0.0124575	0.46291	1
ENSG00000260896	-	-	-	A_24_P542797	0.332154	7.0235	2.8173	0.0124632	0.46291	1
ENSG00000144488	ESPNL	ESPNL_HUMAN	Q6ZVH7	A_24_P170983	-0.279329	7.64539	-2.81722	0.0124653	0.46291	1
ENSG00000164116	GUCY1A3	GCYA3_HUMAN	Q02108	A_23_P69573	0.262204	7.41489	2.81711	0.012468	0.46291	1
ENSG00000250361	GYPB	GLPB_HUMAN	P06028	A_23_P212854	0.202609	7.36564	2.81635	0.0124876	0.46291	1
ENSG00000108187	PBLD	PBLD_HUMAN	P30039	A_24_P126484	-0.261515	6.93054	-2.81624	0.0124903	0.46291	1
ENSG00000189227	C15orf61	CO061_HUMAN	A6NNL5	A_23_P26143	0.218001	9.80547	2.81595	0.0124978	0.46291	1
ENSG00000057468	MSH4	MSH4_HUMAN	O15457	A_23_P74068	-0.283423	7.04314	-2.81577	0.0125025	0.46291	1
ENSG00000177406	-	-	-	A_23_P431569	0.224769	8.03492	2.81559	0.0125071	0.46291	1
ENSG00000147162	OGT	OGT1_HUMAN	O15294	A_23_P381976	-0.215656	7.89598	-2.81533	0.0125138	0.46291	1
ENSG00000244306	-	-	-	A_24_P497235	-0.223613	7.08497	-2.81471	0.0125299	0.46291	1
ENSG00000225210	-	-	-	A_24_P497235	-0.223613	7.08497	-2.81471	0.0125299	0.46291	1
ENSG00000271127	-	-	-	A_24_P497235	-0.223613	7.08497	-2.81471	0.0125299	0.46291	1
ENSG00000143921	ABCG8	ABCG8_HUMAN	Q9H221	A_23_P90577	-0.248661	7.07149	-2.81456	0.0125337	0.46291	1
ENSG00000279090	-	-	-	A_32_P78705	0.298698	7.01274	2.81429	0.0125407	0.46291	1
ENSG00000259996	-	-	-	A_24_P50666	-0.320921	11.0534	-2.81426	0.0125415	0.46291	1
ENSG00000115183	TANC1	TANC1_HUMAN	Q9C0D5	A_23_P388400	0.364413	9.99509	2.81415	0.0125442	0.46291	1
ENSG00000185973	TMLHE	TMLH_HUMAN	Q9NVH6	A_23_P62335	0.20818	8.50547	2.81278	0.0125797	0.46291	1
ENSG00000174748	RPL15	RL15_HUMAN	P61313	A_23_P253200	-0.292076	12.6565	-2.81272	0.0125812	0.46291	1
ENSG00000119231	SENP5	SENP5_HUMAN	Q96HI0	A_23_P29504	0.195958	8.55824	2.81213	0.0125966	0.46291	1
ENSG00000111245	MYL2	MLRV_HUMAN	P10916	A_23_P162547	0.272632	7.90724	2.81163	0.0126095	0.46291	1
ENSG00000231532	-	-	-	A_32_P83270	0.221086	7.02534	2.81156	0.0126114	0.46291	1
ENSG00000279392	-	-	-	A_32_P91250	0.252984	12.8493	2.81076	0.012632	0.46291	1
ENSG00000185651	UBE2L3	UB2L3_HUMAN	P68036	A_32_P91250	0.252984	12.8493	2.81076	0.012632	0.46291	1
ENSG00000127589	-	-	-	A_32_P78528	-0.222388	14.2224	-2.81053	0.0126382	0.46291	1
ENSG00000052841	TTC17	TTC17_HUMAN	Q96AE7	A_23_P64247	-0.286361	8.04704	-2.8101	0.0126492	0.46291	1
ENSG00000065361	ERBB3	ERBB3_HUMAN	P21860	A_23_P349416	-0.2907	9.42338	-2.80917	0.0126736	0.46291	1
ENSG00000065361	c-erbB-3	ERBB3_HUMAN	P21860	A_23_P349416	-0.2907	9.42338	-2.80917	0.0126736	0.46291	1
ENSG00000169174	PCSK9	PCSK9_HUMAN	Q8NBP7	A_32_P142440	0.260134	11.8849	2.80886	0.0126816	0.46291	1
ENSG00000223814	-	-	-	A_32_P232214	0.271288	10.9179	2.80829	0.0126965	0.46291	1
ENSG00000269113	TRABD2B	TIKI2_HUMAN	A6NFA1	A_32_P232214	0.271288	10.9179	2.80829	0.0126965	0.46291	1
ENSG00000139438	FAM222A	F222A_HUMAN	Q5U5X8	A_23_P128375	0.240796	10.9444	2.80741	0.0127195	0.46291	1
ENSG00000176386	CDC26	CDC26_HUMAN	Q8NHZ8	A_23_P331087	0.20504	10.8395	2.80717	0.0127257	0.46291	1
ENSG00000083782	EPYC	EPYC_HUMAN	Q99645	A_23_P87678	-0.247126	7.06049	-2.80709	0.0127279	0.46291	1
ENSG00000221890	NPTXR	NPTXR_HUMAN	O95502	A_23_P29282	-0.192333	7.23272	-2.80621	0.0127509	0.46291	1
ENSG00000179029	TMEM107	TM107_HUMAN	Q6UX40	A_24_P284353	0.263668	11.9138	2.80617	0.0127519	0.46291	1
ENSG00000136488	CSH1	CSH1_HUMAN	P0DML2	A_24_P211044	-0.512106	9.2182	-2.80553	0.0127689	0.463062	1
ENSG00000213218	CSH1	CSH2_HUMAN	P0DML3	A_24_P211044	-0.512106	9.2182	-2.80553	0.0127689	0.463062	1
ENSG00000213218	CSH2	CSH2_HUMAN	P0DML3	A_24_P211044	-0.512106	9.2182	-2.80553	0.0127689	0.463062	1
ENSG00000172575	RASGRP1	GRP1_HUMAN	O95267	A_23_P124642	0.312501	8.72617	2.80407	0.0128073	0.463062	1
ENSG00000118990	-	-	-	A_24_P126741	0.256285	9.48246	2.80353	0.0128215	0.463062	1
ENSG00000171987	C11orf40	CK040_HUMAN	Q8WZ69	A_23_P314672	0.237101	7.00661	2.80242	0.0128507	0.463062	1
ENSG00000122085	MTERF4	MTEF4_HUMAN	Q7Z6M4	A_24_P817066	0.220898	10.1339	2.80241	0.012851	0.463062	1
ENSG00000146416	AIG1	AIG1_HUMAN	Q9NVV5	A_24_P740692	-0.215037	7.16164	-2.80073	0.0128957	0.463062	1
ENSG00000075340	ADD2	ADDB_HUMAN	P35612	A_23_P317636	-0.284578	8.05086	-2.80044	0.0129032	0.463062	1
ENSG00000233247	-	-	-	A_24_P148450	-0.242524	10.9212	-2.80019	0.01291	0.463062	1
ENSG00000170035	UBE2E3	UB2E3_HUMAN	Q969T4	A_24_P148450	-0.242524	10.9212	-2.80019	0.01291	0.463062	1
ENSG00000044115	CTNNA1	CTNA1_HUMAN	P35221	A_24_P80633	-0.223175	11.717	-2.79864	0.0129511	0.463062	1
ENSG00000261512	-	-	-	A_32_P86318	0.226404	11.0365	2.79803	0.0129674	0.463062	1
ENSG00000261796	-	-	-	A_32_P86318	0.226404	11.0365	2.79803	0.0129674	0.463062	1
ENSG00000172780	RAB43	RAB43_HUMAN	Q86YS6	A_32_P86318	0.226404	11.0365	2.79803	0.0129674	0.463062	1
ENSG00000275896	PRSS3P2	-	-	A_32_P94444	0.401793	12.6507	2.79788	0.0129714	0.463062	1
ENSG00000156515	HK1	HXK1_HUMAN	P19367	A_23_P217958	-0.317017	11.5589	-2.79767	0.0129771	0.463062	1
ENSG00000106852	LHX6	LHX6_HUMAN	Q9UPM6	A_23_P32175	-0.281216	7.65886	-2.79741	0.012984	0.463062	1
ENSG00000196188	CTSE	CATE_HUMAN	P14091	A_23_P10291	0.199209	7.20903	2.79701	0.0129946	0.463062	1
ENSG00000099968	BCL2L13	B2L13_HUMAN	Q9BXK5	A_24_P410389	-0.228644	7.63839	-2.79697	0.0129956	0.463062	1
ENSG00000277571	ELANE	ELNE_HUMAN	P08246	A_23_P130961	-0.246496	7.06365	-2.79627	0.0130144	0.463062	1
ENSG00000197561	ELANE	ELNE_HUMAN	P08246	A_23_P130961	-0.246496	7.06365	-2.79627	0.0130144	0.463062	1
ENSG00000100906	NFKBIA	IKBA_HUMAN	P25963	A_23_P106002	0.266867	14.483	2.79517	0.013044	0.463062	1
ENSG00000142303	ADAMTS10	ATS10_HUMAN	Q9H324	A_23_P108314	-0.271479	7.47396	-2.79484	0.0130527	0.463062	1
ENSG00000151364	KCTD14	KCD14_HUMAN	Q9BQ13	A_23_P162165	-0.203963	8.16456	-2.7946	0.0130592	0.463062	1
ENSG00000118156	ZNF541	ZN541_HUMAN	Q9H0D2	A_23_P50517	-0.235267	7.07146	-2.79453	0.0130612	0.463062	1
ENSG00000242973	-	-	-	A_32_P111336	0.280806	6.8894	2.79421	0.0130696	0.463062	1
ENSG00000041802	LSG1	LSG1_HUMAN	Q9H089	A_24_P148657	-0.284919	9.45658	-2.7937	0.0130835	0.463062	1
ENSG00000129534	MIS18BP1	M18BP_HUMAN	Q6P0N0	A_23_P106162	-0.226277	9.99277	-2.79329	0.0130943	0.463062	1
ENSG00000133114	GPALPP1	GPAM1_HUMAN	Q8IXQ4	A_23_P2732	0.209226	8.94088	2.79273	0.0131095	0.463062	1
ENSG00000123104	ITPR2	ITPR2_HUMAN	Q14571	A_23_P203933	-0.29571	7.88259	-2.79253	0.013115	0.463062	1
ENSG00000106648	GALNTL5	GLTL5_HUMAN	Q7Z4T8	A_23_P429601	0.269192	6.94715	2.7916	0.0131401	0.463062	1
ENSG00000213740	-	-	-	A_32_P139079	-0.261753	14.7415	-2.79121	0.0131507	0.463062	1
ENSG00000142864	SERBP1	PAIRB_HUMAN	Q8NC51	A_32_P139079	-0.261753	14.7415	-2.79121	0.0131507	0.463062	1
ENSG00000153283	CD96	TACT_HUMAN	P40200	A_32_P7502	-0.27697	7.08215	-2.7911	0.0131536	0.463062	1
ENSG00000112539	C6orf118	CF118_HUMAN	Q5T5N4	A_32_P85106	0.359498	7.07882	2.79068	0.0131649	0.463062	1
ENSG00000148384	INPP5E	INP5E_HUMAN	Q9NRR6	A_23_P94875	0.237276	7.92521	2.79041	0.0131721	0.463062	1
ENSG00000168566	SNRNP48	SNR48_HUMAN	Q6IEG0	A_24_P46725	-0.253771	8.56835	-2.79005	0.013182	0.463062	1
ENSG00000080200	CRYBG3	CRBG3_HUMAN	Q68DQ2	A_23_P303810	0.201954	8.37594	2.79003	0.0131825	0.463062	1
ENSG00000189403	HMGB1	HMGB1_HUMAN	P09429	A_24_P169148	-0.288634	13.8514	-2.78988	0.0131866	0.463062	1
ENSG00000213707	-	-	-	A_24_P169148	-0.288634	13.8514	-2.78988	0.0131866	0.463062	1
ENSG00000132967	-	-	-	A_24_P169148	-0.288634	13.8514	-2.78988	0.0131866	0.463062	1
ENSG00000124097	-	-	-	A_24_P169148	-0.288634	13.8514	-2.78988	0.0131866	0.463062	1
ENSG00000130300	PLVAP	PLVAP_HUMAN	Q9BX97	A_23_P56328	0.340756	7.14131	2.78952	0.0131964	0.463062	1
ENSG00000114554	PLXNA1	PLXA1_HUMAN	Q9UIW2	A_23_P57667	0.267828	13.947	2.78777	0.013244	0.463062	1
ENSG00000152439	ZNF773	ZN773_HUMAN	Q6PK81	A_23_P153256	-0.212872	8.96628	-2.78772	0.0132452	0.463062	1
ENSG00000164904	ALDH7A1	AL7A1_HUMAN	P49419	A_24_P269006	-0.234794	9.37336	-2.78599	0.0132924	0.463062	1
ENSG00000141101	NOB1	NOB1_HUMAN	Q9ULX3	A_23_P106822	-0.243673	10.9918	-2.7858	0.0132975	0.463062	1
ENSG00000248795	-	-	-	A_23_P106822	-0.243673	10.9918	-2.7858	0.0132975	0.463062	1
ENSG00000151093	OXSM	OXSM_HUMAN	Q9NWU1	A_23_P132486	0.208072	9.16644	2.7856	0.0133031	0.463062	1
ENSG00000088930	XRN2	XRN2_HUMAN	Q9H0D6	A_23_P166135	-0.280436	10.6865	-2.7855	0.0133057	0.463062	1
ENSG00000111319	SCNN1A	SCNNA_HUMAN	P37088	A_23_P128323	-0.306228	8.78796	-2.78549	0.0133062	0.463062	1
ENSG00000130822	PNCK	KCC1B_HUMAN	Q6P2M8	A_23_P62377	-0.213158	7.30872	-2.78445	0.0133346	0.463062	1
ENSG00000256628	-	-	-	A_23_P306479	0.241438	8.61148	2.78443	0.013335	0.463062	1
ENSG00000232032	-	-	-	A_32_P34	0.238668	9.51915	2.7842	0.0133413	0.463062	1
ENSG00000250940	-	-	-	A_32_P34	0.238668	9.51915	2.7842	0.0133413	0.463062	1
ENSG00000223688	-	-	-	A_32_P34	0.238668	9.51915	2.7842	0.0133413	0.463062	1
ENSG00000255253	-	-	-	A_32_P34	0.238668	9.51915	2.7842	0.0133413	0.463062	1
ENSG00000271057	-	-	-	A_32_P34	0.238668	9.51915	2.7842	0.0133413	0.463062	1
ENSG00000101812	H2BFM	H2BFM_HUMAN	P0C1H6	A_32_P85593	0.45655	9.62551	2.78377	0.0133533	0.463062	1
ENSG00000177666	PNPLA2	PLPL2_HUMAN	Q96AD5	A_23_P10077	-0.21542	9.92834	-2.78295	0.0133758	0.463121	1
ENSG00000236398	TAS2R39	T2R39_HUMAN	P59534	A_32_P309662	-0.305013	7.05159	-2.78283	0.0133792	0.463121	1
ENSG00000255345	-	-	-	A_32_P813412	-0.295571	7.02554	-2.78192	0.013404	0.463121	1
ENSG00000102007	PLP2	PLP2_HUMAN	Q04941	A_24_P74932	-0.230569	8.72564	-2.78183	0.0134067	0.463121	1
ENSG00000148735	PLEKHS1	PKHS1_HUMAN	Q5SXH7	A_24_P286951	-0.205838	6.85926	-2.78156	0.0134141	0.463121	1
ENSG00000148248	SURF4	SURF4_HUMAN	O15260	A_24_P89971	0.265991	11.0377	2.78098	0.0134299	0.463121	1
ENSG00000000457	SCYL3	PACE1_HUMAN	Q8IZE3	A_23_P74320	0.202872	8.6089	2.78084	0.0134339	0.463121	1
ENSG00000234753	-	-	-	A_32_P226768	0.291096	8.54673	2.78008	0.0134547	0.463449	1
ENSG00000129151	BBOX1	BODG_HUMAN	O75936	A_23_P127495	0.274535	7.00278	2.77912	0.0134814	0.463852	1
ENSG00000075643	MOCOS	MOCOS_HUMAN	Q96EN8	A_32_P48086	-0.269423	7.26818	-2.77885	0.013489	0.463852	1
ENSG00000187116	LILRA5	LIRA5_HUMAN	A6NI73	A_24_P370172	-0.236838	7.03926	-2.77741	0.0135289	0.46448	1
ENSG00000006625	GGCT	GGCT_HUMAN	O75223	A_23_P42695	-0.235377	12.5864	-2.77723	0.0135337	0.46448	1
ENSG00000088832	FKBP12-Exin	FKB1A_HUMAN	P62942	A_23_P154667	-0.261622	11.2318	-2.77697	0.0135412	0.46448	1
ENSG00000088832	FKBP12-Exip2	FKB1A_HUMAN	P62942	A_23_P154667	-0.261622	11.2318	-2.77697	0.0135412	0.46448	1
ENSG00000088832	FKBP1A	FKB1A_HUMAN	P62942	A_23_P154667	-0.261622	11.2318	-2.77697	0.0135412	0.46448	1
ENSG00000117139	KDM5B	KDM5B_HUMAN	Q9UGL1	A_23_P1038	-0.413719	10.2294	-2.77494	0.0135977	0.464873	1
ENSG00000150995	ITPR1	ITPR1_HUMAN	Q14643	A_23_P92042	-0.244081	7.79681	-2.77471	0.0136042	0.464873	1
ENSG00000273345	-	-	-	A_23_P110643	0.247214	8.50767	2.77454	0.013609	0.464873	1
ENSG00000006837	CDKL3	CDKL3_HUMAN	Q8IVW4	A_23_P110643	0.247214	8.50767	2.77454	0.013609	0.464873	1
ENSG00000105438	KDELR1	ERD21_HUMAN	P24390	A_23_P4919	-0.364636	11.9054	-2.77411	0.013621	0.464873	1
ENSG00000184481	FOXO4	FOXO4_HUMAN	P98177	A_24_P379165	-0.249344	8.29957	-2.77281	0.0136574	0.464873	1
ENSG00000275663	HIST1H4G	H4G_HUMAN	Q99525	A_24_P277673	0.243771	7.1494	2.77264	0.0136621	0.464873	1
ENSG00000100532	CGRRF1	CGRF1_HUMAN	Q99675	A_23_P37275	0.210498	10.0155	2.77255	0.0136645	0.464873	1
ENSG00000149054	ZNF215	ZN215_HUMAN	Q9UL58	A_23_P53057	-0.212092	9.22518	-2.77227	0.0136724	0.464873	1
ENSG00000230849	-	-	-	A_24_P692198	-0.215597	8.97707	-2.77212	0.0136767	0.464873	1
ENSG00000087884	AAMDC	AAMDC_HUMAN	Q9H7C9	A_24_P49383	0.204835	12.0482	2.77211	0.013677	0.464873	1
ENSG00000184588	PDE4B	PDE4B_HUMAN	Q07343	A_23_P74278	-0.326434	10.3613	-2.77067	0.0137176	0.465767	1
ENSG00000198336	MYL4	MYL4_HUMAN	P12829	A_24_P151032	0.399937	10.7892	2.76949	0.0137508	0.465767	1
ENSG00000185842	DNAH14	DYH14_HUMAN	Q0VDD8	A_24_P917290	0.265141	6.89148	2.76948	0.0137509	0.465767	1
ENSG00000279515	FLJ20019	-	-	A_23_P33558	-0.251861	7.12252	-2.76916	0.01376	0.465767	1
ENSG00000196323	ZBTB44	ZBT44_HUMAN	Q8NCP5	A_23_P202945	-0.227381	9.06653	-2.76876	0.0137713	0.465767	1
ENSG00000005059	CCDC109B	MCUB_HUMAN	Q9NWR8	A_23_P255376	-0.394066	9.10153	-2.76861	0.0137755	0.465767	1
ENSG00000101203	COL20A1	COKA1_HUMAN	Q9P218	A_24_P918575	0.220264	6.79577	2.76836	0.0137827	0.465767	1
ENSG00000273264	-	-	-	A_24_P928006	0.254874	7.09896	2.76764	0.0138031	0.465864	1
ENSG00000198336	MYL4	MYL4_HUMAN	P12829	A_24_P188218	0.468415	13.4307	2.76721	0.0138151	0.465864	1
ENSG00000153395	LPCAT1	PCAT1_HUMAN	Q8NF37	A_23_P213471	-0.2297	7.74594	-2.76706	0.0138196	0.465864	1
ENSG00000003989	SLC7A2	CTR2_HUMAN	P52569	A_23_P255837	-0.212584	7.21867	-2.7666	0.0138326	0.465922	1
ENSG00000184988	TMEM106A	T106A_HUMAN	Q96A25	A_23_P435521	0.189555	7.20362	2.76503	0.0138771	0.466519	1
ENSG00000152270	PDE3B	PDE3B_HUMAN	Q13370	A_23_P116114	-0.255306	7.89588	-2.76466	0.0138876	0.466519	1
ENSG00000138193	PLCE1	PLCE1_HUMAN	Q9P212	A_23_P35617	0.339063	11.4215	2.7643	0.0138981	0.466519	1
ENSG00000163638	ADAMTS9	ATS9_HUMAN	Q9P2N4	A_32_P196263	0.390673	9.5031	2.7641	0.0139037	0.466519	1
ENSG00000140873	ADAMTS18	ATS18_HUMAN	Q8TE60	A_32_P34844	0.357109	10.0902	2.76398	0.0139071	0.466519	1
ENSG00000029534	ANK1	ANK1_HUMAN	P16157	A_23_P216108	-0.303591	8.14711	-2.76349	0.0139212	0.466611	1
ENSG00000144681	STAC	STAC_HUMAN	Q99469	A_23_P121061	-0.277434	7.29018	-2.76212	0.0139603	0.467419	1
ENSG00000121775	TMEM39B	TM39B_HUMAN	Q9GZU3	A_23_P34496	-0.230841	10.4693	-2.76134	0.0139828	0.467419	1
ENSG00000254101	-	-	-	A_24_P564761	0.29855	7.1388	2.76044	0.0140085	0.467419	1
ENSG00000105438	KDELR1	ERD21_HUMAN	P24390	A_23_P4913	-0.216051	12.3177	-2.76013	0.0140174	0.467419	1
ENSG00000228253	MT-ATP8	ATP8_HUMAN	P03928	A_24_P350200	-0.293334	16.4876	-2.75957	0.0140336	0.467419	1
ENSG00000198899	MT-ATP6	ATP6_HUMAN	P00846	A_24_P350200	-0.293334	16.4876	-2.75957	0.0140336	0.467419	1
ENSG00000198938	MT-CO3	COX3_HUMAN	P00414	A_24_P350200	-0.293334	16.4876	-2.75957	0.0140336	0.467419	1
ENSG00000198744	-	-	-	A_24_P350200	-0.293334	16.4876	-2.75957	0.0140336	0.467419	1
ENSG00000248527	-	-	-	A_24_P350200	-0.293334	16.4876	-2.75957	0.0140336	0.467419	1
ENSG00000240409	-	-	-	A_24_P350200	-0.293334	16.4876	-2.75957	0.0140336	0.467419	1
ENSG00000047346	FAM214A	F214A_HUMAN	Q32MH5	A_23_P99853	0.271475	10.8671	2.75953	0.0140347	0.467419	1
ENSG00000176076	KCNE1L	KCE1L_HUMAN	Q9UJ90	A_23_P256641	-0.27013	8.15056	-2.75862	0.0140611	0.467419	1
ENSG00000068366	ACSL4	ACSL4_HUMAN	O60488	A_23_P256641	-0.27013	8.15056	-2.75862	0.0140611	0.467419	1
ENSG00000136867	SLC31A2	COPT2_HUMAN	O15432	A_23_P217109	0.225048	9.31024	2.7584	0.0140673	0.467419	1
ENSG00000145423	SFRP2	SFRP2_HUMAN	Q96HF1	A_23_P81103	-0.474352	9.63864	-2.75785	0.0140832	0.467419	1
ENSG00000171560	FGA	FIBA_HUMAN	P02671	A_24_P282251	-0.380872	7.09802	-2.75769	0.0140877	0.467419	1
ENSG00000204472	AIF1	AIF1_HUMAN	P55008	A_23_P214627	-0.285356	8.59392	-2.75687	0.0141116	0.467419	1
ENSG00000234699	-	-	-	A_24_P460599	-0.216375	7.09243	-2.75653	0.0141213	0.467419	1
ENSG00000149516	MS4A3	MS4A3_HUMAN	Q96HJ5	A_23_P161909	0.299841	6.97914	2.75627	0.014129	0.467419	1
ENSG00000142082	SIRT3	SIR3_HUMAN	Q9NTG7	A_24_P85158	0.218559	10.2513	2.75443	0.0141824	0.467419	1
ENSG00000104154	SLC30A4	ZNT4_HUMAN	O14863	A_32_P21255	0.258103	7.69664	2.75366	0.0142047	0.467419	1
ENSG00000225698	IGHV3-72	-	-	A_24_P323298	0.343707	6.93219	2.7536	0.0142065	0.467419	1
ENSG00000180769	-	-	-	A_32_P213861	0.198786	7.35696	2.75341	0.014212	0.467419	1
ENSG00000105270	CLIP3	CLIP3_HUMAN	Q96DZ5	A_24_P279718	-0.213866	7.6416	-2.75333	0.0142144	0.467419	1
ENSG00000173432	SAA1	SAA1_HUMAN	P0DJI8	A_23_P75830	0.256342	6.97264	2.75329	0.0142154	0.467419	1
ENSG00000150471	LPHN3	LPHN3_HUMAN	Q9HAR2	A_23_P10980	0.263775	8.26569	2.75239	0.0142418	0.467419	1
ENSG00000143226	FCGR2A	FCG2A_HUMAN	P12318	A_23_P85716	-0.207307	7.17355	-2.75223	0.0142463	0.467419	1
ENSG00000148690	FRA10AC1	F10C1_HUMAN	Q70Z53	A_24_P189464	0.214268	10.0877	2.7519	0.014256	0.467419	1
ENSG00000111181	SLC6A12	S6A12_HUMAN	P48065	A_23_P76386	-0.265362	7.15519	-2.75156	0.0142661	0.467419	1
ENSG00000221994	ZNF630	ZN630_HUMAN	Q2M218	A_23_P390384	0.300829	9.75945	2.75145	0.0142692	0.467419	1
ENSG00000144355	DLX1	DLX1_HUMAN	P56177	A_23_P403466	0.295252	7.2013	2.75123	0.0142757	0.467419	1
ENSG00000130726	TRIM28	TIF1B_HUMAN	Q13263	A_23_P89884	-0.238212	13.7381	-2.75047	0.014298	0.467419	1
ENSG00000171490	RSL1D1	RL1D1_HUMAN	O76021	A_23_P54605	-0.211019	11.5484	-2.74982	0.0143171	0.467419	1
ENSG00000164483	SAMD3	SAMD3_HUMAN	Q8N6K7	A_23_P397937	0.320223	9.96381	2.74952	0.0143257	0.467419	1
ENSG00000130208	APOC1	APOC1_HUMAN	P02654	A_23_P4649	0.302618	13.5754	2.74902	0.0143406	0.467419	1
ENSG00000205629	LCMT1	LCMT1_HUMAN	Q9UIC8	A_23_P112825	-0.284384	12.441	-2.74892	0.0143434	0.467419	1
ENSG00000075945	KIFAP3	KIFA3_HUMAN	Q92845	A_23_P62920	0.196847	10.0075	2.74811	0.0143674	0.467793	1
ENSG00000009307	CSDE1	CSDE1_HUMAN	O75534	A_23_P74595	-0.214007	13.7144	-2.74722	0.0143937	0.467942	1
ENSG00000160401	C9orf117	CI117_HUMAN	Q5JU67	A_24_P229638	-0.220613	7.01406	-2.74486	0.0144634	0.469395	1
ENSG00000177875	CCDC184	CC184_HUMAN	Q52MB2	A_23_P344194	0.230299	6.90525	2.74445	0.0144753	0.469395	1
ENSG00000099995	SF3A1	SF3A1_HUMAN	Q15459	A_24_P250614	0.226241	9.94022	2.74383	0.014494	0.469395	1
ENSG00000100503	NIN	NIN_HUMAN	Q8N4C6	A_24_P412512	-0.217119	7.04544	-2.74367	0.0144987	0.469395	1
ENSG00000102218	RP2	XRP2_HUMAN	O75695	A_23_P22433	0.263264	10.7956	2.74274	0.0145262	0.469395	1
ENSG00000004468	CD38	CD38_HUMAN	P28907	A_32_P32195	-0.204238	7.10197	-2.74227	0.0145403	0.469395	1
ENSG00000091704	CPA1	CBPA1_HUMAN	P15085	A_23_P168357	0.344727	6.98767	2.74225	0.0145409	0.469395	1
ENSG00000266028	SRGAP2	-	-	A_23_P200829	0.260145	12.9903	2.74186	0.0145524	0.469395	1
ENSG00000239883	-	-	-	A_23_P377411	-0.273182	7.13769	-2.74186	0.0145526	0.469395	1
ENSG00000178440	-	-	-	A_23_P377411	-0.273182	7.13769	-2.74186	0.0145526	0.469395	1
ENSG00000272140	-	-	-	A_23_P377411	-0.273182	7.13769	-2.74186	0.0145526	0.469395	1
ENSG00000152128	TMEM163	TM163_HUMAN	Q8TC26	A_23_P39550	0.226378	7.01868	2.74113	0.0145743	0.469726	1
ENSG00000102100	SLC35A2	S35A2_HUMAN	P78381	A_23_P217208	0.229391	7.46806	2.74012	0.0146046	0.46973	1
ENSG00000124440	HIF3A	HIF3A_HUMAN	Q9Y2N7	A_23_P374339	0.260042	9.39483	2.73931	0.0146287	0.46973	1
ENSG00000136011	STAB2	STAB2_HUMAN	Q8WWQ8	A_23_P162607	0.320218	7.08137	2.73875	0.0146455	0.46973	1
ENSG00000079337	RAPGEF3	RPGF3_HUMAN	O95398	A_32_P393316	0.224893	7.80487	2.73827	0.0146599	0.46973	1
ENSG00000277874	-	-	-	A_32_P393316	0.224893	7.80487	2.73827	0.0146599	0.46973	1
ENSG00000065357	DGKA	DGKA_HUMAN	P23743	A_23_P105307	-0.237874	8.67052	-2.738	0.0146681	0.46973	1
ENSG00000101974	ATP11C	AT11C_HUMAN	Q8NB49	A_23_P251730	-0.201093	8.53425	-2.73688	0.0147017	0.46973	1
ENSG00000232239	-	-	-	A_24_P796652	-0.235244	10.6833	-2.73681	0.0147038	0.46973	1
ENSG00000227924	-	-	-	A_24_P796652	-0.235244	10.6833	-2.73681	0.0147038	0.46973	1
ENSG00000234217	-	-	-	A_24_P796652	-0.235244	10.6833	-2.73681	0.0147038	0.46973	1
ENSG00000274181	-	-	-	A_24_P796652	-0.235244	10.6833	-2.73681	0.0147038	0.46973	1
ENSG00000205250	E2F4	E2F4_HUMAN	Q16254	A_23_P152218	-0.252919	9.60737	-2.73644	0.0147149	0.46973	1
ENSG00000111642	CHD4	CHD4_HUMAN	Q14839	A_23_P53541	-0.266096	11.5532	-2.73625	0.0147208	0.46973	1
ENSG00000166736	HTR3A	5HT3A_HUMAN	P46098	A_23_P98399	-0.241442	7.75158	-2.73615	0.0147236	0.46973	1
ENSG00000239704	CDRT4	CDRT4_HUMAN	Q8N9R6	A_23_P427083	0.221567	9.57471	2.73555	0.014742	0.46973	1
ENSG00000259024	TVP23C	-	-	A_23_P427083	0.221567	9.57471	2.73555	0.014742	0.46973	1
ENSG00000102195	GPR50	MTR1L_HUMAN	Q13585	A_23_P159721	-0.221287	7.12715	-2.73539	0.0147466	0.46973	1
ENSG00000154096	THY1	THY1_HUMAN	P04216	A_23_P36364	-0.320073	13.1356	-2.73466	0.0147687	0.46973	1
ENSG00000168824	D4S234E	-	-	A_23_P371107	-0.344807	9.0347	-2.73391	0.0147913	0.470085	1
ENSG00000174844	DNAH12	DYH12_HUMAN	Q6ZR08	A_24_P169402	-0.228034	7.02153	-2.73331	0.0148096	0.47028	1
ENSG00000139974	SLC38A6	S38A6_HUMAN	Q8IZM9	A_23_P88309	0.199803	8.92352	2.73296	0.0148203	0.47028	1
ENSG00000134250	NOTCH2	NOTC2_HUMAN	Q04721	A_24_P50057	0.32258	12.1129	2.73248	0.0148349	0.470338	1
ENSG00000111801	BTN3A3	BT3A3_HUMAN	O00478	A_24_P311917	-0.24778	7.02749	-2.73189	0.0148529	0.470338	1
ENSG00000165704	HPRT1	HPRT_HUMAN	P00492	A_23_P11372	-0.229033	10.1759	-2.73074	0.0148878	0.470338	1
ENSG00000069399	BCL3	BCL3_HUMAN	P20749	A_23_P4662	0.226897	10.082	2.73066	0.0148903	0.470338	1
ENSG00000277615	CNOT3	CNOT3_HUMAN	O75175	A_23_P38987	-0.200434	9.78537	-2.72986	0.0149146	0.470422	1
ENSG00000274616	CNOT3	CNOT3_HUMAN	O75175	A_23_P38987	-0.200434	9.78537	-2.72986	0.0149146	0.470422	1
ENSG00000276082	CNOT3	CNOT3_HUMAN	O75175	A_23_P38987	-0.200434	9.78537	-2.72986	0.0149146	0.470422	1
ENSG00000273943	CNOT3	CNOT3_HUMAN	O75175	A_23_P38987	-0.200434	9.78537	-2.72986	0.0149146	0.470422	1
ENSG00000274176	CNOT3	CNOT3_HUMAN	O75175	A_23_P38987	-0.200434	9.78537	-2.72986	0.0149146	0.470422	1
ENSG00000274941	CNOT3	CNOT3_HUMAN	O75175	A_23_P38987	-0.200434	9.78537	-2.72986	0.0149146	0.470422	1
ENSG00000275979	CNOT3	CNOT3_HUMAN	O75175	A_23_P38987	-0.200434	9.78537	-2.72986	0.0149146	0.470422	1
ENSG00000277114	CNOT3	CNOT3_HUMAN	O75175	A_23_P38987	-0.200434	9.78537	-2.72986	0.0149146	0.470422	1
ENSG00000088038	CNOT3	CNOT3_HUMAN	O75175	A_23_P38987	-0.200434	9.78537	-2.72986	0.0149146	0.470422	1
ENSG00000277600	CNOT3	CNOT3_HUMAN	O75175	A_23_P38987	-0.200434	9.78537	-2.72986	0.0149146	0.470422	1
ENSG00000267174	-	-	-	A_24_P255415	0.233651	7.05194	2.72962	0.0149219	0.470422	1
ENSG00000261612	-	-	-	A_32_P2333	0.186207	13.8398	2.72943	0.0149279	0.470422	1
ENSG00000113387	SUB1	TCP4_HUMAN	P53999	A_32_P2333	0.186207	13.8398	2.72943	0.0149279	0.470422	1
ENSG00000187653	-	-	-	A_23_P399201	0.195324	16.7656	2.72869	0.0149503	0.470474	1
ENSG00000230043	-	-	-	A_23_P399201	0.195324	16.7656	2.72869	0.0149503	0.470474	1
ENSG00000205542	TMSB4X	TYB4_HUMAN	P62328	A_23_P399201	0.195324	16.7656	2.72869	0.0149503	0.470474	1
ENSG00000236876	-	-	-	A_23_P399201	0.195324	16.7656	2.72869	0.0149503	0.470474	1
ENSG00000223551	TMSB4XP4	-	-	A_23_P399201	0.195324	16.7656	2.72869	0.0149503	0.470474	1
ENSG00000186193	SAPCD2	SAPC2_HUMAN	Q86UD0	A_24_P100517	-0.273832	10.3393	-2.72808	0.0149689	0.470474	1
ENSG00000132780	NASP	NASP_HUMAN	P49321	A_32_P28365	-0.210109	13.9725	-2.72783	0.0149768	0.470474	1
ENSG00000057252	SOAT1	SOAT1_HUMAN	P35610	A_32_P103131	0.317771	10.3267	2.72704	0.0150009	0.470474	1
ENSG00000141034	GID4	GID4_HUMAN	Q8IVV7	A_23_P164427	0.401085	10.8197	2.72701	0.0150019	0.470474	1
ENSG00000224025	-	-	-	A_24_P871726	-0.248552	8.87945	-2.72642	0.0150199	0.470474	1
ENSG00000173698	GPR64	GPR64_HUMAN	Q8IZP9	A_24_P932547	0.266149	7.09664	2.72606	0.0150311	0.470474	1
ENSG00000183421	RIPK4	RIPK4_HUMAN	P57078	A_24_P125871	0.312798	11.1872	2.72543	0.0150505	0.470474	1
ENSG00000228897	-	-	-	A_23_P436336	-0.274928	12.6709	-2.72479	0.0150702	0.470474	1
ENSG00000154124	OTULIN	OTUL_HUMAN	Q96BN8	A_24_P414446	0.202678	8.32501	2.72439	0.0150826	0.470474	1
ENSG00000174500	GCSAM	GCSAM_HUMAN	Q8N6F7	A_23_P253250	-0.262152	7.07019	-2.72416	0.0150898	0.470474	1
ENSG00000132824	SERINC3	SERC3_HUMAN	Q13530	A_23_P79836	0.275133	12.2129	2.72342	0.0151124	0.470624	1
ENSG00000181222	POLR2A	RPB1_HUMAN	P24928	A_24_P99679	-0.204568	7.90901	-2.72326	0.0151175	0.470624	1
ENSG00000167615	LENG8	LENG8_HUMAN	Q96PV6	A_24_P40061	0.200729	8.10142	2.72132	0.0151778	0.472143	1
ENSG00000196218	RYR1	RYR1_HUMAN	P21817	A_24_P170544	0.236362	7.14729	2.71895	0.0152513	0.473286	1
ENSG00000173451	THAP2	THAP2_HUMAN	Q9H0W7	A_24_P350437	0.206692	7.24673	2.71871	0.0152589	0.473286	1
ENSG00000175170	FAM182B	F182B_HUMAN	Q5T319	A_23_P166147	0.268693	8.37645	2.71845	0.0152671	0.473286	1
ENSG00000184564	-	-	-	A_23_P65307	-0.222151	7.32966	-2.71829	0.0152719	0.473286	1
ENSG00000126602	TRAP1	TRAP1_HUMAN	Q12931	A_23_P3849	-0.243294	10.8762	-2.71829	0.0152721	0.473286	1
ENSG00000260418	-	-	-	A_32_P30874	0.210462	9.50379	2.71681	0.0153182	0.473879	1
ENSG00000163202	LCE3D	LCE3D_HUMAN	Q9BYE3	A_23_P115519	0.273538	6.98117	2.71648	0.0153287	0.473879	1
ENSG00000227927	-	-	-	A_24_P400412	-0.230531	7.05772	-2.71643	0.0153303	0.473879	1
ENSG00000180914	OXTR	OXYR_HUMAN	P30559	A_24_P337104	-0.275697	7.85999	-2.71586	0.0153481	0.473879	1
ENSG00000187720	THSD4	THSD4_HUMAN	Q6ZMP0	A_23_P65717	0.278751	6.94337	2.71524	0.0153675	0.473879	1
ENSG00000005513	SOX8	SOX8_HUMAN	P57073	A_23_P66137	-0.348034	9.89502	-2.71487	0.0153792	0.473879	1
ENSG00000186594	-	-	-	A_23_P49610	0.375	9.79761	2.71473	0.0153835	0.473879	1
ENSG00000151694	ADAM17	ADA17_HUMAN	P78536	A_24_P157053	0.196185	9.24188	2.7146	0.0153876	0.473879	1
ENSG00000268104	SLC6A14	S6A14_HUMAN	Q9UN76	A_24_P365721	0.206867	6.88334	2.71437	0.015395	0.473879	1
ENSG00000228606	-	-	-	A_24_P886960	0.262618	8.40493	2.71391	0.0154095	0.473969	1
ENSG00000162493	PDPN	PDPN_HUMAN	Q86YL7	A_23_P430068	-0.269455	10.707	-2.71055	0.0155158	0.476251	1
ENSG00000279158	VCY	VCY1_HUMAN	O14598	A_23_P11390	0.265328	9.12833	2.70969	0.015543	0.476251	1
ENSG00000279158	VCY1B	VCY1_HUMAN	O14598	A_23_P11390	0.265328	9.12833	2.70969	0.015543	0.476251	1
ENSG00000279451	VCY	VCY1_HUMAN	O14598	A_23_P11390	0.265328	9.12833	2.70969	0.015543	0.476251	1
ENSG00000279451	VCY1B	VCY1_HUMAN	O14598	A_23_P11390	0.265328	9.12833	2.70969	0.015543	0.476251	1
ENSG00000129864	VCY	VCY1_HUMAN	O14598	A_23_P11390	0.265328	9.12833	2.70969	0.015543	0.476251	1
ENSG00000129864	VCY1B	VCY1_HUMAN	O14598	A_23_P11390	0.265328	9.12833	2.70969	0.015543	0.476251	1
ENSG00000129862	VCY	VCY1_HUMAN	O14598	A_23_P11390	0.265328	9.12833	2.70969	0.015543	0.476251	1
ENSG00000129862	VCY1B	VCY1_HUMAN	O14598	A_23_P11390	0.265328	9.12833	2.70969	0.015543	0.476251	1
ENSG00000186907	RTN4RL2	R4RL2_HUMAN	Q86UN3	A_23_P139104	-0.252661	9.76327	-2.70884	0.0155699	0.476251	1
ENSG00000108342	CSF3	CSF3_HUMAN	P09919	A_23_P501754	-0.25209	6.97656	-2.70841	0.0155838	0.476251	1
ENSG00000174792	C4orf26	CD026_HUMAN	Q17RF5	A_23_P386268	0.21142	7.09252	2.70673	0.0156374	0.476251	1
ENSG00000080166	DCT	TYRP2_HUMAN	P40126	A_24_P390150	-0.332241	6.94739	-2.70597	0.0156616	0.476251	1
ENSG00000249563	-	-	-	A_24_P649388	0.33	9.54059	2.70588	0.0156644	0.476251	1
ENSG00000253917	-	-	-	A_24_P649388	0.33	9.54059	2.70588	0.0156644	0.476251	1
ENSG00000271977	-	-	-	A_24_P649388	0.33	9.54059	2.70588	0.0156644	0.476251	1
ENSG00000166979	EVA1C	EVA1C_HUMAN	P58658	A_24_P649388	0.33	9.54059	2.70588	0.0156644	0.476251	1
ENSG00000177108	ZDHHC22	ZDH22_HUMAN	Q8N966	A_23_P355447	-0.326247	8.26127	-2.70542	0.0156792	0.476251	1
ENSG00000141510	TP53	P53_HUMAN	P04637	A_23_P26810	-0.2623	8.43326	-2.70491	0.0156956	0.476251	1
ENSG00000073584	SMARCE1	SMCE1_HUMAN	Q969G3	A_32_P20221	0.25899	8.43159	2.70455	0.0157073	0.476251	1
ENSG00000081320	STK17B	ST17B_HUMAN	O94768	A_23_P154367	-0.261636	8.03736	-2.70433	0.0157141	0.476251	1
ENSG00000142661	MYOM3	MYOM3_HUMAN	Q5VTT5	A_23_P51213	0.355433	7.04664	2.70394	0.0157266	0.476251	1
ENSG00000272405	-	-	-	A_32_P2730	-0.260628	7.50402	-2.70387	0.0157289	0.476251	1
ENSG00000101444	AHCY	SAHH_HUMAN	P23526	A_24_P57367	-0.241505	12.2809	-2.70348	0.0157414	0.476251	1
ENSG00000166743	ACSM1	ACSM1_HUMAN	Q08AH1	A_23_P106933	-0.22997	7.02731	-2.70309	0.0157542	0.476251	1
ENSG00000075461	CACNG4	CCG4_HUMAN	Q9UBN1	A_24_P70303	-0.210461	7.44116	-2.70296	0.0157584	0.476251	1
ENSG00000198788	MUC2	MUC2_HUMAN	Q02817	A_24_P84657	0.236524	6.94708	2.70286	0.0157615	0.476251	1
ENSG00000073792	IGF2BP2	IF2B2_HUMAN	Q9Y6M1	A_23_P250156	-0.22192	10.5491	-2.70244	0.0157749	0.476251	1
ENSG00000171121	KCNMB3	KCMB3_HUMAN	Q9NPA1	A_24_P251661	-0.251307	7.28318	-2.70171	0.0157985	0.476251	1
ENSG00000112116	IL17F	IL17F_HUMAN	Q96PD4	A_23_P167882	-0.245543	7.09147	-2.70084	0.0158266	0.476251	1
ENSG00000245970	-	-	-	A_32_P54260	-0.241006	7.50767	-2.70025	0.0158458	0.476251	1
ENSG00000204469	PRRC2A	PRC2A_HUMAN	P48634	A_23_P30870	-0.324239	10.5601	-2.69933	0.0158756	0.476251	1
ENSG00000172346	CSDC2	CSDC2_HUMAN	Q9Y534	A_24_P177279	-0.243914	7.45557	-2.69923	0.0158789	0.476251	1
ENSG00000157637	SLC38A10	S38AA_HUMAN	Q9HBR0	A_23_P55011	0.204194	12.6209	2.69846	0.0159037	0.476251	1
ENSG00000141744	PNMT	PNMT_HUMAN	P11086	A_23_P100642	-0.255831	8.01438	-2.69846	0.0159038	0.476251	1
ENSG00000164163	ABCE1	ABCE1_HUMAN	P61221	A_23_P41380	-0.232806	10.5077	-2.69807	0.0159165	0.476251	1
ENSG00000100196	KDELR3	ERD23_HUMAN	O43731	A_23_P211504	0.246663	9.09315	2.69796	0.01592	0.476251	1
ENSG00000241476	SSX2	SSX2_HUMAN	Q16385	A_24_P256243	0.322895	9.60618	2.69795	0.0159203	0.476251	1
ENSG00000241476	SSX2B	SSX2_HUMAN	Q16385	A_24_P256243	0.322895	9.60618	2.69795	0.0159203	0.476251	1
ENSG00000268447	SSX2	SSX2_HUMAN	Q16385	A_24_P256243	0.322895	9.60618	2.69795	0.0159203	0.476251	1
ENSG00000268447	SSX2B	SSX2_HUMAN	Q16385	A_24_P256243	0.322895	9.60618	2.69795	0.0159203	0.476251	1
ENSG00000170858	-	-	-	A_23_P27781	0.213992	7.48292	2.69722	0.0159442	0.476251	1
ENSG00000071054	MAP4K4	-	-	A_23_P102192	-0.262919	10.101	-2.69688	0.0159552	0.476251	1
ENSG00000129244	ATP1B2	AT1B2_HUMAN	P14415	A_24_P31275	-0.23287	8.63928	-2.69573	0.0159928	0.476251	1
ENSG00000120688	WBP4	WBP4_HUMAN	O75554	A_23_P140035	0.213758	10.5606	2.69552	0.0159996	0.476251	1
ENSG00000135749	PCNXL2	PCX2_HUMAN	A6NKB5	A_23_P200267	-0.209477	7.86148	-2.69551	0.016	0.476251	1
ENSG00000125999	BPIFB1	BPIB1_HUMAN	Q8TDL5	A_23_P154784	0.280874	7.01265	2.69545	0.0160018	0.476251	1
ENSG00000244067	GSTA2	GSTA2_HUMAN	P09210	A_24_P300394	0.265712	8.80201	2.69502	0.0160158	0.476251	1
ENSG00000160951	PTGER1	PE2R1_HUMAN	P34995	A_23_P4808	0.231999	7.26888	2.69499	0.0160168	0.476251	1
ENSG00000159176	CSRP1	CSRP1_HUMAN	P21291	A_23_P74359	-0.309382	8.51086	-2.69498	0.0160171	0.476251	1
ENSG00000160994	CCDC105	CC105_HUMAN	Q8IYK2	A_32_P503113	0.208241	6.91306	2.69496	0.0160179	0.476251	1
ENSG00000130208	APOC1	APOC1_HUMAN	P02654	A_24_P109214	0.250556	13.3542	2.69455	0.0160314	0.476251	1
ENSG00000117600	LPPR4	-	-	A_32_P148538	-0.369404	7.83391	-2.69437	0.016037	0.476251	1
ENSG00000237378	-	-	-	A_23_P342751	0.286614	7.94558	2.69433	0.0160385	0.476251	1
ENSG00000219926	-	-	-	A_23_P342751	0.286614	7.94558	2.69433	0.0160385	0.476251	1
ENSG00000231817	-	-	-	A_23_P342751	0.286614	7.94558	2.69433	0.0160385	0.476251	1
ENSG00000265241	RBM8A	RBM8A_HUMAN	Q9Y5S9	A_24_P79955	0.261894	12.0588	2.69428	0.01604	0.476251	1
ENSG00000187098	MITF	MITF_HUMAN	O75030	A_23_P426663	0.232182	8.59583	2.69144	0.0161336	0.477093	1
ENSG00000187098	MITF-C	MITF_HUMAN	O75030	A_23_P426663	0.232182	8.59583	2.69144	0.0161336	0.477093	1
ENSG00000145476	CYP4V2	CP4V2_HUMAN	Q6ZWL3	A_24_P945228	-0.260008	7.0017	-2.69141	0.0161345	0.477093	1
ENSG00000213625	LEPROT	OBRG_HUMAN	O15243	A_23_P1126	-0.253442	12.2536	-2.69005	0.0161794	0.477629	1
ENSG00000115592	PRKAG3	AAKG3_HUMAN	Q9UGI9	A_23_P28258	0.257409	6.84484	2.68882	0.01622	0.478098	1
ENSG00000090097	PCBP4	PCBP4_HUMAN	P57723	A_23_P166807	0.230996	13.3372	2.68866	0.0162254	0.478098	1
ENSG00000179178	TMEM125	TM125_HUMAN	Q96AQ2	A_23_P115022	-0.309865	11.4702	-2.68745	0.0162655	0.478098	1
ENSG00000260735	-	-	-	A_32_P230529	-0.220479	6.95345	-2.68742	0.0162664	0.478098	1
ENSG00000265808	SEC22B	SC22B_HUMAN	O75396	A_23_P200815	0.255444	9.71469	2.68661	0.0162934	0.478098	1
ENSG00000198515	CNGA1	CNGA1_HUMAN	P29973	A_23_P92536	0.230109	6.98716	2.6866	0.0162934	0.478098	1
ENSG00000164318	EGFLAM	EGFLA_HUMAN	Q63HQ2	A_23_P144911	0.263273	9.40555	2.68646	0.0162982	0.478098	1
ENSG00000072135	PTPN18	PTN18_HUMAN	Q99952	A_23_P210015	-0.179401	7.88788	-2.68641	0.0163	0.478098	1
ENSG00000163825	RTP3	RTP3_HUMAN	Q9BQQ7	A_23_P57910	-0.247385	7.0663	-2.6846	0.0163601	0.478272	1
ENSG00000101266	CSNK2A1	CSK21_HUMAN	P68400	A_23_P502575	-0.192433	11.2581	-2.68451	0.0163633	0.478272	1
ENSG00000184185	KCNJ12	KCJ12_HUMAN	Q14500	A_24_P339429	0.278909	9.13556	2.68385	0.0163854	0.478272	1
ENSG00000159648	TEPP	TEPP_HUMAN	Q6URK8	A_24_P75183	0.300262	8.13527	2.68322	0.0164062	0.478272	1
ENSG00000224706	-	-	-	A_24_P332504	0.31896	8.92681	2.68313	0.0164094	0.478272	1
ENSG00000131019	ULBP3	N2DL3_HUMAN	Q9BZM4	A_23_P134100	-0.225015	7.10909	-2.68313	0.0164094	0.478272	1
ENSG00000255164	-	-	-	A_24_P800629	0.179804	10.5581	2.6824	0.0164339	0.478272	1
ENSG00000254618	-	-	-	A_24_P800629	0.179804	10.5581	2.6824	0.0164339	0.478272	1
ENSG00000157343	ARMC12	ARM12_HUMAN	Q5T9G4	A_32_P146113	-0.269221	7.10487	-2.68167	0.0164582	0.478301	1
ENSG00000136883	KIF12	KIF12_HUMAN	Q96FN5	A_23_P386356	-0.221625	7.21659	-2.6808	0.0164875	0.478476	1
ENSG00000235644	-	-	-	A_32_P725839	0.272684	8.01306	2.67818	0.016576	0.479722	1
ENSG00000050344	NFE2L3	NF2L3_HUMAN	Q9Y4A8	A_23_P42718	-0.420885	11.9286	-2.67793	0.0165844	0.479722	1
ENSG00000122778	KIAA1549	K1549_HUMAN	Q9HCM3	A_32_P226186	0.28952	9.20163	2.6778	0.0165888	0.479722	1
ENSG00000198682	PAPSS2	PAPS2_HUMAN	O95340	A_24_P940166	0.231629	10.6643	2.6769	0.0166193	0.480264	1
ENSG00000145287	PLAC8	PLAC8_HUMAN	Q9NZF1	A_24_P183128	0.302575	8.27602	2.67286	0.0167568	0.483074	1
ENSG00000256804	-	-	-	A_24_P183128	0.302575	8.27602	2.67286	0.0167568	0.483074	1
ENSG00000163818	LZTFL1	LZTL1_HUMAN	Q9NQ48	A_23_P41049	0.195276	10.0731	2.67188	0.0167901	0.483074	1
ENSG00000100092	SH3BP1	3BP1_HUMAN	Q9Y3L3	A_24_P259192	-0.208347	8.03279	-2.67185	0.0167914	0.483074	1
ENSG00000243147	MRPL33	RM33_HUMAN	O75394	A_24_P285480	0.228279	12.3557	2.67127	0.0168112	0.483074	1
ENSG00000108187	PBLD	PBLD_HUMAN	P30039	A_23_P149998	0.193396	8.04173	2.66993	0.016857	0.483074	1
ENSG00000121060	TRIM25	TRI25_HUMAN	Q14258	A_24_P936767	-0.245822	7.77004	-2.66935	0.0168769	0.483074	1
ENSG00000187601	MAGEH1	MAGH1_HUMAN	Q9H213	A_23_P34144	0.243087	11.0824	2.66918	0.0168828	0.483074	1
ENSG00000089327	FXYD5	FXYD5_HUMAN	Q96DB9	A_23_P130995	-0.237969	10.3614	-2.66904	0.0168875	0.483074	1
ENSG00000117713	ARID1A	ARI1A_HUMAN	O14497	A_24_P92952	-0.243985	10.3485	-2.66867	0.0169004	0.483074	1
ENSG00000156049	GNA14	GNA14_HUMAN	O95837	A_24_P415150	-0.391345	8.06823	-2.66833	0.0169121	0.483074	1
ENSG00000154813	DPH3	DPH3_HUMAN	Q96FX2	A_24_P225907	0.23697	9.81108	2.66809	0.0169205	0.483074	1
ENSG00000099957	P2RX6	P2RX6_HUMAN	O15547	A_23_P355980	0.282465	7.13006	2.66801	0.016923	0.483074	1
ENSG00000185811	IKZF1	IKZF1_HUMAN	Q13422	A_23_P135646	0.290222	7.02463	2.66794	0.0169254	0.483074	1
ENSG00000185811	ZNFN1A1	IKZF1_HUMAN	Q13422	A_23_P135646	0.290222	7.02463	2.66794	0.0169254	0.483074	1
ENSG00000259703	-	-	-	A_32_P479743	-0.257027	7.06217	-2.66792	0.0169264	0.483074	1
ENSG00000150907	FOXO1	FOXO1_HUMAN	Q12778	A_24_P22079	-0.253085	10.5527	-2.66738	0.0169448	0.483074	1
ENSG00000177455	CD19	CD19_HUMAN	P15391	A_23_P113572	-0.305406	7.90016	-2.66724	0.0169497	0.483074	1
ENSG00000133687	TMTC1	TMTC1_HUMAN	Q8IUR5	A_23_P203957	0.187569	10.9394	2.66718	0.0169516	0.483074	1
ENSG00000168032	ENTPD3	ENTP3_HUMAN	O75355	A_23_P212469	0.277116	7.07739	2.66598	0.0169932	0.483922	1
ENSG00000175197	DDIT3	DDIT3_HUMAN	P35638	A_23_P21134	0.307215	9.34876	2.66504	0.0170259	0.484518	1
ENSG00000131652	THOC6	THOC6_HUMAN	Q86W42	A_23_P37949	-0.228857	8.67147	-2.66449	0.0170448	0.484722	1
ENSG00000242221	PSG2	PSG2_HUMAN	P11465	A_23_P142335	-0.206772	7.0903	-2.66366	0.0170737	0.485208	1
ENSG00000248632	-	-	-	A_32_P215789	-0.242969	7.27353	-2.66294	0.0170987	0.485417	1
ENSG00000156510	HKDC1	HKDC1_HUMAN	Q2TB90	A_23_P202427	-0.242708	6.93113	-2.66273	0.0171062	0.485417	1
ENSG00000100099	HPS4	HPS4_HUMAN	Q9NQG7	A_23_P109442	0.191164	10.2364	2.66243	0.0171165	0.485417	1
ENSG00000216588	IGSF23	IGS23_HUMAN	A1L1A6	A_24_P750817	-0.403122	6.93108	-2.66021	0.017194	0.486943	1
ENSG00000116663	FBXO6	FBX6_HUMAN	Q9NRD1	A_23_P97064	0.24083	8.12085	2.65939	0.0172228	0.487423	1
ENSG00000108950	FAM20A	FA20A_HUMAN	Q96MK3	A_32_P108254	0.251214	11.7546	2.65737	0.017294	0.488513	1
ENSG00000108950	FP2747	FA20A_HUMAN	Q96MK3	A_32_P108254	0.251214	11.7546	2.65737	0.017294	0.488513	1
ENSG00000088305	DNMT3B	DNM3B_HUMAN	Q9UBC3	A_23_P28953	-0.301288	14.715	-2.65728	0.017297	0.488513	1
ENSG00000147862	NFIB	NFIB_HUMAN	O00712	A_24_P804992	0.263187	7.11803	2.65679	0.0173145	0.48856	1
ENSG00000156475	PPP2R2B	2ABB_HUMAN	Q00005	A_23_P213620	-0.432214	9.95792	-2.65656	0.0173225	0.48856	1
ENSG00000259580	-	-	-	A_23_P37676	-0.332978	8.85128	-2.65602	0.0173416	0.488579	1
ENSG00000166073	GPR176	GP176_HUMAN	Q14439	A_23_P37676	-0.332978	8.85128	-2.65602	0.0173416	0.488579	1
ENSG00000165113	GKAP1	GKAP1_HUMAN	Q5VSY0	A_23_P94546	0.215437	8.66431	2.65526	0.0173682	0.488579	1
ENSG00000189376	C8orf76	CH076_HUMAN	Q96K31	A_23_P31747	0.19791	11.8519	2.65492	0.0173804	0.488579	1
ENSG00000065534	MYLK	MYLK_HUMAN	Q15746	A_24_P319923	-0.264414	8.27211	-2.65467	0.0173893	0.488579	1
ENSG00000117280	RAB29	RAB7L_HUMAN	O14966	A_24_P234094	-0.208356	7.79243	-2.65452	0.0173945	0.488579	1
ENSG00000180628	PCGF5	PCGF5_HUMAN	Q86SE9	A_24_P941699	0.228016	7.59365	2.65267	0.0174603	0.489548	1
ENSG00000100068	LRP5L	LRP5L_HUMAN	A4QPB2	A_24_P387514	0.234925	7.57364	2.65239	0.0174701	0.489548	1
ENSG00000101871	MID1	TRI18_HUMAN	O15344	A_23_P170037	-0.302318	10.4778	-2.65085	0.0175249	0.489548	1
ENSG00000105732	ZNF574	ZN574_HUMAN	Q6ZN55	A_23_P89931	-0.261738	10.6666	-2.65059	0.0175342	0.489548	1
ENSG00000186866	POFUT2	OFUT2_HUMAN	Q9Y2G5	A_24_P14595	0.199515	11.9616	2.65034	0.0175433	0.489548	1
ENSG00000266620	-	-	-	A_32_P200787	-0.262308	7.39692	-2.65026	0.0175459	0.489548	1
ENSG00000221944	TIGD1	TIGD1_HUMAN	Q96MW7	A_32_P200787	-0.262308	7.39692	-2.65026	0.0175459	0.489548	1
ENSG00000186472	PCLO	PCLO_HUMAN	Q9Y6V0	A_32_P109876	0.252174	6.99016	2.64946	0.0175745	0.489548	1
ENSG00000255537	-	-	-	A_24_P170970	0.269892	6.92787	2.64856	0.0176068	0.489548	1
ENSG00000104953	TLE6	TLE6_HUMAN	Q9H808	A_23_P426501	0.192897	8.44488	2.64784	0.0176327	0.489548	1
ENSG00000100351	GRAP2	GRAP2_HUMAN	O75791	A_24_P408449	-0.236807	6.92002	-2.6474	0.0176485	0.489548	1
ENSG00000186469	GNG2	GBG2_HUMAN	P59768	A_23_P32536	0.184166	7.7523	2.64651	0.0176805	0.489548	1
ENSG00000273011	-	-	-	A_24_P98145	0.238631	6.9791	2.64642	0.0176837	0.489548	1
ENSG00000124496	BCAR2	TREF1_HUMAN	Q96PN7	A_23_P59022	-0.258422	9.09745	-2.64618	0.0176924	0.489548	1
ENSG00000124496	TRERF1	TREF1_HUMAN	Q96PN7	A_23_P59022	-0.258422	9.09745	-2.64618	0.0176924	0.489548	1
ENSG00000174437	ATP2A2	AT2A2_HUMAN	P16615	A_23_P53603	-0.198908	9.59347	-2.64613	0.0176941	0.489548	1
ENSG00000185038	MROH2A	-	-	A_32_P427222	-0.211344	6.9941	-2.64604	0.0176972	0.489548	1
ENSG00000213842	-	-	-	A_24_P324488	0.256166	10.742	2.64526	0.0177254	0.489548	1
ENSG00000255370	-	-	-	A_24_P272073	0.233492	9.7078	2.64454	0.0177513	0.489548	1
ENSG00000090382	LYZ	LYSC_HUMAN	P61626	A_24_P42264	-0.309685	7.04211	-2.6445	0.0177528	0.489548	1
ENSG00000077312	SNRPA	SNRPA_HUMAN	P09012	A_23_P164718	-0.279323	12.1944	-2.64405	0.0177692	0.489548	1
ENSG00000100209	HSCB	HSC20_HUMAN	Q8IWL3	A_23_P40588	0.188502	10.4373	2.64367	0.017783	0.489548	1
ENSG00000215149	-	-	-	A_24_P161809	0.417497	8.29869	2.64364	0.0177838	0.489548	1
ENSG00000112981	NME5	NDK5_HUMAN	P56597	A_23_P156402	0.209769	8.39823	2.64317	0.0178011	0.489548	1
ENSG00000231898	-	-	-	A_32_P179548	0.285116	7.01515	2.6431	0.0178034	0.489548	1
ENSG00000178971	CTC1	CTC1_HUMAN	Q2NKJ3	A_23_P78191	0.254198	9.86875	2.6424	0.0178288	0.489548	1
ENSG00000198113	TOR4A	TOR4A_HUMAN	Q9NXH8	A_23_P147109	-0.213183	8.42016	-2.64215	0.0178377	0.489548	1
ENSG00000110002	VWA5A	VMA5A_HUMAN	O00534	A_23_P98455	0.276245	10.3731	2.64194	0.0178456	0.489548	1
ENSG00000198924	DCLRE1A	DCR1A_HUMAN	Q6PJP8	A_23_P75038	0.235197	10.5591	2.64121	0.017872	0.489548	1
ENSG00000122417	ODF2L	ODF2L_HUMAN	Q9ULJ1	A_23_P364167	-0.269729	6.93332	-2.64112	0.0178754	0.489548	1
ENSG00000111731	C2CD5	C2CD5_HUMAN	Q86YS7	A_23_P151027	-0.209792	8.32505	-2.64064	0.0178927	0.489548	1
ENSG00000198225	FKBP1C	-	-	A_24_P289818	-0.211339	9.99635	-2.64048	0.0178986	0.489548	1
ENSG00000160161	CILP2	CILP2_HUMAN	Q8IUL8	A_23_P377318	-0.206431	7.6007	-2.63953	0.0179333	0.489548	1
ENSG00000233316	-	-	-	A_23_P394874	-0.326523	6.97393	-2.63938	0.0179387	0.489548	1
ENSG00000257925	-	-	-	A_24_P830361	0.299234	6.93868	2.63937	0.0179388	0.489548	1
ENSG00000132530	XAF1	XAF1_HUMAN	Q6GPH4	A_23_P4286	0.272179	7.21407	2.63788	0.0179934	0.489548	1
ENSG00000181649	PHLDA2	PHLA2_HUMAN	Q53GA4	A_23_P47614	0.295768	11.3393	2.63766	0.0180014	0.489548	1
ENSG00000185046	ANKS1B	ANS1B_HUMAN	Q7Z6G8	A_23_P356717	0.312286	8.62185	2.63746	0.0180089	0.489548	1
ENSG00000230896	-	-	-	A_24_P855152	0.211386	7.87042	2.63723	0.0180172	0.489548	1
ENSG00000197429	IPP	IPP_HUMAN	Q9Y573	A_24_P855152	0.211386	7.87042	2.63723	0.0180172	0.489548	1
ENSG00000129187	DCTD	DCTD_HUMAN	P32321	A_24_P345948	0.219889	12.0314	2.63625	0.0180532	0.489548	1
ENSG00000076944	STXBP2	STXB2_HUMAN	Q15833	A_23_P130619	-0.222661	8.13695	-2.63589	0.0180663	0.489548	1
ENSG00000110536	PTPMT1	PTPM1_HUMAN	Q8WUK0	A_24_P110062	0.191219	8.34441	2.63577	0.0180708	0.489548	1
ENSG00000244563	-	-	-	A_23_P209778	-0.198737	11.4885	-2.63574	0.0180719	0.489548	1
ENSG00000144231	POLR2D	RPB4_HUMAN	O15514	A_23_P209778	-0.198737	11.4885	-2.63574	0.0180719	0.489548	1
ENSG00000266984	-	-	-	A_24_P59147	-0.20508	7.92361	-2.63554	0.018079	0.489548	1
ENSG00000145198	VWA5B2	VW5B2_HUMAN	Q8N398	A_24_P152881	0.220871	8.21697	2.63511	0.0180951	0.489548	1
ENSG00000215203	GRXCR1	GRCR1_HUMAN	A8MXD5	A_24_P495367	0.249388	7.0165	2.63508	0.018096	0.489548	1
ENSG00000071564	TCF3	TFE2_HUMAN	P15923	A_24_P367397	-0.202511	10.7178	-2.63371	0.0181467	0.489548	1
ENSG00000236567	-	-	-	A_24_P367397	-0.202511	10.7178	-2.63371	0.0181467	0.489548	1
ENSG00000157219	HTR5A	5HT5A_HUMAN	P47898	A_23_P304373	0.225838	6.99416	2.63346	0.0181558	0.489548	1
ENSG00000127993	RBM48	RBM48_HUMAN	Q5RL73	A_23_P71111	-0.228403	7.83473	-2.63315	0.0181672	0.489548	1
ENSG00000167769	ACER1	ACER1_HUMAN	Q8TDN7	A_23_P38952	-0.186433	7.14551	-2.63307	0.0181701	0.489548	1
ENSG00000101057	MYBL2	MYBB_HUMAN	P10244	A_23_P143190	-0.224881	11.2509	-2.63305	0.0181708	0.489548	1
ENSG00000226887	ERVMER34-1	MER34_HUMAN	Q9H9K5	A_23_P92583	-0.33203	8.2578	-2.63215	0.0182043	0.489548	1
ENSG00000170523	KRT83	KRT83_HUMAN	P78385	A_24_P410408	0.231969	7.024	2.63171	0.0182204	0.489548	1
ENSG00000224215	-	-	-	A_32_P33185	-0.250017	6.97932	-2.63151	0.0182277	0.489548	1
ENSG00000167925	GHDC	GHDC_HUMAN	Q8N2G8	A_24_P258800	-0.205757	7.62105	-2.6302	0.0182764	0.489548	1
ENSG00000117154	IGSF21	IGS21_HUMAN	Q96ID5	A_32_P78101	-0.278475	10.4045	-2.63005	0.0182819	0.489548	1
ENSG00000134569	LRP4	LRP4_HUMAN	O75096	A_24_P403561	-0.249955	8.79995	-2.62966	0.0182964	0.489548	1
ENSG00000242485	MRPL20	RM20_HUMAN	Q9BYC9	A_23_P97473	0.186889	13.6985	2.62959	0.0182992	0.489548	1
ENSG00000166387	PPFIBP2	LIPB2_HUMAN	Q8ND30	A_23_P409623	0.351663	10.964	2.62906	0.0183187	0.489548	1
ENSG00000243836	-	-	-	A_32_P138396	0.217893	8.3748	2.62809	0.0183549	0.489548	1
ENSG00000164438	TLX3	TLX3_HUMAN	O43711	A_23_P70219	-0.220817	7.10498	-2.62804	0.0183566	0.489548	1
ENSG00000064666	CNN2	CNN2_HUMAN	Q99439	A_24_P142743	-0.262204	14.184	-2.62699	0.018396	0.489548	1
ENSG00000136802	LRRC8A	LRC8A_HUMAN	Q8IWT6	A_24_P376287	-0.235508	9.04257	-2.62696	0.0183973	0.489548	1
ENSG00000261455	-	-	-	A_32_P6172	0.230184	8.61376	2.62655	0.0184125	0.489548	1
ENSG00000120341	SEC16B	SC16B_HUMAN	Q96JE7	A_24_P153734	0.226077	8.31568	2.62611	0.0184288	0.489548	1
ENSG00000141469	SLC14A1	UT1_HUMAN	Q13336	A_24_P926507	-0.293803	7.00187	-2.62574	0.0184427	0.489548	1
ENSG00000109943	CRTAM	CRTAM_HUMAN	O95727	A_23_P305092	-0.218816	6.96999	-2.62569	0.0184447	0.489548	1
ENSG00000187778	MCRS1	MCRS1_HUMAN	Q96EZ8	A_23_P48237	-0.18925	11.4947	-2.62533	0.0184581	0.489548	1
ENSG00000160180	TFF3	-	-	A_24_P245778	-0.221959	6.77147	-2.62517	0.018464	0.489548	1
ENSG00000172572	PDE3A	PDE3A_HUMAN	Q14432	A_32_P4778	-0.19604	7.11491	-2.62508	0.0184676	0.489548	1
ENSG00000215146	-	-	-	A_32_P43826	0.246628	7.04073	2.6249	0.0184741	0.489548	1
ENSG00000174437	ATP2A2	AT2A2_HUMAN	P16615	A_24_P141786	-0.2021	9.70228	-2.62471	0.0184815	0.489548	1
ENSG00000170745	KCNS3	KCNS3_HUMAN	Q9BQ31	A_23_P120103	-0.250168	9.95779	-2.62447	0.0184902	0.489548	1
ENSG00000115085	ZAP70	ZAP70_HUMAN	P43403	A_23_P39682	0.268417	8.93776	2.62409	0.0185045	0.489548	1
ENSG00000232301	-	-	-	A_32_P211752	-0.486318	12.6837	-2.62393	0.0185108	0.489548	1
ENSG00000273173	SNURF	SNURF_HUMAN	Q9Y675	A_24_P347624	-0.220756	13.2073	-2.62366	0.0185206	0.489548	1
ENSG00000214265	SNURF	SNURF_HUMAN	Q9Y675	A_24_P347624	-0.220756	13.2073	-2.62366	0.0185206	0.489548	1
ENSG00000128739	SNRPN	RSMN_HUMAN	P63162	A_24_P347624	-0.220756	13.2073	-2.62366	0.0185206	0.489548	1
ENSG00000128915	ICE2	ICE2_HUMAN	Q659A1	A_32_P129419	-0.243213	7.78557	-2.62344	0.018529	0.489548	1
ENSG00000166509	CLEC3A	CLC3A_HUMAN	O75596	A_23_P26404	0.304253	7.12966	2.6233	0.0185345	0.489548	1
ENSG00000107882	SUFU	SUFU_HUMAN	Q9UMX1	A_24_P149902	0.200968	7.35942	2.62311	0.0185416	0.489548	1
ENSG00000035687	ADSS	PURA2_HUMAN	P30520	A_23_P859	-0.351723	9.44961	-2.62231	0.0185718	0.489548	1
ENSG00000198829	SUCNR1	SUCR1_HUMAN	Q9BXA5	A_24_P265832	0.3097	6.83471	2.62192	0.0185864	0.489548	1
ENSG00000180104	EXOC3	EXOC3_HUMAN	O60645	A_23_P389676	0.262908	7.9848	2.62186	0.0185885	0.489548	1
ENSG00000162490	DRAXIN	DRAXI_HUMAN	Q8NBI3	A_24_P109417	-0.32458	8.93327	-2.62131	0.0186092	0.489548	1
ENSG00000100297	MCM5	MCM5_HUMAN	P33992	A_23_P132277	-0.210273	12.7101	-2.62057	0.0186374	0.489548	1
ENSG00000119943	PYROXD2	PYRD2_HUMAN	Q8N2H3	A_23_P24157	-0.244785	7.61125	-2.62044	0.0186423	0.489548	1
ENSG00000198707	CEP290	CE290_HUMAN	O15078	A_23_P36865	0.190728	8.87442	2.62025	0.0186494	0.489548	1
ENSG00000159023	EPB41	41_HUMAN	P11171	A_24_P558070	0.205108	6.97973	2.61998	0.0186595	0.489548	1
ENSG00000124610	HIST1H1A	H11_HUMAN	Q02539	A_23_P70448	-0.765178	10.4582	-2.61993	0.0186616	0.489548	1
ENSG00000167074	TEF	TEF_HUMAN	Q10587	A_23_P91757	-0.320023	7.12782	-2.61914	0.0186915	0.489548	1
ENSG00000159131	GART	PUR2_HUMAN	P22102	A_23_P80098	-0.295233	12.4131	-2.61906	0.0186945	0.489548	1
ENSG00000137135	ARHGEF39	ARG39_HUMAN	Q8N4T4	A_24_P30034	-0.220739	8.08423	-2.6185	0.0187157	0.489548	1
ENSG00000234134	-	-	-	A_24_P179416	0.267649	6.93231	2.61826	0.018725	0.489548	1
ENSG00000092964	DPYSL2	DPYL2_HUMAN	Q16555	A_24_P38347	-0.298975	10.6724	-2.61823	0.018726	0.489548	1
ENSG00000187954	CYHR1	CYHR1_HUMAN	Q6ZMK1	A_24_P89843	0.245352	10.3247	2.61799	0.0187351	0.489548	1
ENSG00000165102	HGSNAT	HGNAT_HUMAN	Q68CP4	A_23_P112061	0.250057	10.8425	2.61772	0.0187453	0.489548	1
ENSG00000164171	ITGA2	ITA2_HUMAN	P17301	A_32_P178800	-0.31385	7.1065	-2.61771	0.0187459	0.489548	1
ENSG00000144136	SLC20A1	S20A1_HUMAN	Q8WUM9	A_24_P103004	-0.281829	8.77719	-2.6174	0.0187578	0.489548	1
ENSG00000065882	TBC1D1	TBCD1_HUMAN	Q86TI0	A_23_P73023	-0.268917	11.1194	-2.61714	0.0187674	0.489548	1
ENSG00000272960	-	-	-	A_32_P46954	-0.205723	7.13147	-2.61698	0.0187737	0.489548	1
ENSG00000101323	HAO1	HAOX1_HUMAN	Q9UJM8	A_23_P154708	0.316718	7.05345	2.61683	0.0187792	0.489548	1
ENSG00000174136	RGMB	RGMB_HUMAN	Q6NW40	A_23_P58796	0.197782	9.92269	2.61663	0.0187871	0.489548	1
ENSG00000046651	OFD1	OFD1_HUMAN	O75665	A_23_P254226	-0.199326	8.76001	-2.61616	0.0188047	0.489698	1
ENSG00000211581	-	-	-	A_23_P426809	-0.198426	8.92099	-2.61509	0.0188457	0.490114	1
ENSG00000132694	ARHGEF11	ARHGB_HUMAN	O15085	A_23_P426809	-0.198426	8.92099	-2.61509	0.0188457	0.490114	1
ENSG00000234170	-	-	-	A_24_P461001	-0.205866	7.06766	-2.61431	0.0188756	0.490267	1
ENSG00000185950	IRS2	IRS2_HUMAN	Q9Y4H2	A_23_P53838	0.236321	7.45338	2.61388	0.0188922	0.490267	1
ENSG00000009954	BAZ1B	BAZ1B_HUMAN	Q9UIG0	A_23_P215449	-0.191156	10.6242	-2.61344	0.0189089	0.490267	1
ENSG00000280266	-	-	-	A_24_P358063	-0.254958	6.96039	-2.61341	0.0189101	0.490267	1
ENSG00000258988	-	-	-	A_23_P35131	-0.187287	8.58653	-2.61239	0.0189494	0.490713	1
ENSG00000143368	SF3B4	SF3B4_HUMAN	Q15427	A_23_P35131	-0.187287	8.58653	-2.61239	0.0189494	0.490713	1
ENSG00000169849	-	-	-	A_24_P409182	-0.241452	7.08911	-2.61195	0.0189664	0.490713	1
ENSG00000180150	-	-	-	A_23_P6514	0.282171	7.53963	2.61129	0.0189917	0.490713	1
ENSG00000089094	FBXL10	KDM2B_HUMAN	Q8NHM5	A_23_P87919	-0.204056	10.7319	-2.61117	0.0189962	0.490713	1
ENSG00000089094	KDM2B	KDM2B_HUMAN	Q8NHM5	A_23_P87919	-0.204056	10.7319	-2.61117	0.0189962	0.490713	1
ENSG00000106278	PTPRZ1	PTPRZ_HUMAN	P23471	A_23_P168761	-0.426851	10.5199	-2.61102	0.0190021	0.490713	1
ENSG00000196628	TCF4	ITF2_HUMAN	P15884	A_23_P27332	-0.263048	11.6854	-2.61052	0.0190212	0.490713	1
ENSG00000228253	MT-ATP8	ATP8_HUMAN	P03928	A_24_P350196	-0.348263	16.2771	-2.60994	0.0190436	0.490713	1
ENSG00000198899	MT-ATP6	ATP6_HUMAN	P00846	A_24_P350196	-0.348263	16.2771	-2.60994	0.0190436	0.490713	1
ENSG00000198938	MT-CO3	COX3_HUMAN	P00414	A_24_P350196	-0.348263	16.2771	-2.60994	0.0190436	0.490713	1
ENSG00000198744	-	-	-	A_24_P350196	-0.348263	16.2771	-2.60994	0.0190436	0.490713	1
ENSG00000248527	-	-	-	A_24_P350196	-0.348263	16.2771	-2.60994	0.0190436	0.490713	1
ENSG00000240409	-	-	-	A_24_P350196	-0.348263	16.2771	-2.60994	0.0190436	0.490713	1
ENSG00000113569	NUP155	NU155_HUMAN	O75694	A_23_P7679	-0.218259	10.5585	-2.60992	0.0190444	0.490713	1
ENSG00000166171	DPCD	DPCD_HUMAN	Q9BVM2	A_23_P52286	0.193232	11.3779	2.60912	0.0190753	0.490713	1
ENSG00000232653	GOLGA8N	GOG8N_HUMAN	F8WBI6	A_32_P42236	0.343712	9.72957	2.60893	0.0190828	0.490713	1
ENSG00000232653	GOLGA8O	GOG8N_HUMAN	F8WBI6	A_32_P42236	0.343712	9.72957	2.60893	0.0190828	0.490713	1
ENSG00000269930	-	-	-	A_32_P42236	0.343712	9.72957	2.60893	0.0190828	0.490713	1
ENSG00000123353	ORMDL2	ORML2_HUMAN	Q53FV1	A_23_P87500	0.220978	13.6866	2.60827	0.0191084	0.490713	1
ENSG00000165494	PCF11	PCF11_HUMAN	O94913	A_24_P835763	0.212877	8.87033	2.60816	0.0191125	0.490713	1
ENSG00000223960	-	-	-	A_32_P66625	0.179532	9.01821	2.60816	0.0191126	0.490713	1
ENSG00000121966	CXCR4	CXCR4_HUMAN	P61073	A_23_P102000	0.263578	15.9658	2.6072	0.0191499	0.490713	1
ENSG00000080603	SRCAP	SRCAP_HUMAN	Q6ZRS2	A_23_P394917	-0.180779	7.83275	-2.60713	0.0191525	0.490713	1
ENSG00000267868	-	-	-	A_32_P52227	0.242458	7.92897	2.60695	0.0191596	0.490713	1
ENSG00000174807	CD248	CD248_HUMAN	Q9HCU0	A_23_P52697	-0.418029	9.25534	-2.60681	0.0191648	0.490713	1
ENSG00000237166	-	-	-	A_24_P516704	-0.274757	6.94479	-2.60658	0.0191739	0.490713	1
ENSG00000103449	SALL1	SALL1_HUMAN	Q9NSC2	A_23_P328074	0.304527	10.0557	2.60644	0.0191793	0.490713	1
ENSG00000107736	CDH23	CAD23_HUMAN	Q9H251	A_23_P217946	-0.180864	7.14957	-2.60626	0.0191864	0.490713	1
ENSG00000140853	NLRC5	NLRC5_HUMAN	Q86WI3	A_32_P416583	0.295145	7.2242	2.60616	0.01919	0.490713	1
ENSG00000110841	PPFIBP1	LIPB1_HUMAN	Q86W92	A_23_P47867	0.276229	9.90408	2.60512	0.0192308	0.49087	1
ENSG00000184005	ST6GALNAC3	SIA7C_HUMAN	Q8NDV1	A_23_P416711	-0.228269	8.40033	-2.60511	0.0192309	0.49087	1
ENSG00000224557	-	-	-	A_23_P59167	-0.305288	8.15805	-2.60509	0.019232	0.49087	1
ENSG00000180806	HOXC9	HXC9_HUMAN	P31274	A_23_P25150	-0.263348	6.80956	-2.60462	0.0192502	0.491029	1
ENSG00000145911	N4BP3	N4BP3_HUMAN	O15049	A_24_P140666	0.172658	7.1156	2.60389	0.0192786	0.491211	1
ENSG00000166188	ZNF319	ZN319_HUMAN	Q9P2F9	A_23_P26314	0.222777	8.17884	2.60339	0.0192981	0.491335	1
ENSG00000113303	BTNL8	BTNL8_HUMAN	Q6UX41	A_23_P7412	-0.289899	7.03897	-2.60273	0.019324	0.491522	1
ENSG00000168418	KCNG4	KCNG4_HUMAN	Q8TDN1	A_23_P206336	0.255602	7.03396	2.60215	0.0193467	0.491522	1
ENSG00000138600	SPPL2A	SPP2A_HUMAN	Q8TCT8	A_32_P50655	0.221486	8.18729	2.60187	0.0193578	0.491522	1
ENSG00000042781	USH2A	USH2A_HUMAN	O75445	A_23_P86301	0.235226	6.97351	2.60079	0.0194	0.491522	1
ENSG00000080561	MID2	TRIM1_HUMAN	Q9UJV3	A_23_P159956	0.196851	8.39007	2.60049	0.0194118	0.491522	1
ENSG00000259948	-	-	-	A_32_P181725	-0.208995	7.06719	-2.60046	0.019413	0.491522	1
ENSG00000105989	WNT2	WNT2_HUMAN	P09544	A_32_P19724	-0.248652	6.88148	-2.59966	0.0194447	0.491522	1
ENSG00000187555	USP7	UBP7_HUMAN	Q93009	A_23_P49481	-0.20861	12.4081	-2.5996	0.0194471	0.491522	1
ENSG00000279286	-	-	-	A_32_P832555	0.247278	7.18154	2.5988	0.0194785	0.491522	1
ENSG00000122218	COPA	COPA_HUMAN	P53621	A_32_P20454	0.215834	9.4049	2.59865	0.0194846	0.491522	1
ENSG00000267060	PTGES3L	PTG3L_HUMAN	E9PB15	A_23_P207414	0.198397	9.26915	2.59847	0.0194917	0.491522	1
ENSG00000108825	AARSD1	AASD1_HUMAN	Q9BTE6	A_23_P207414	0.198397	9.26915	2.59847	0.0194917	0.491522	1
ENSG00000108825	PTGES3L-AARSD1	AASD1_HUMAN	Q9BTE6	A_23_P207414	0.198397	9.26915	2.59847	0.0194917	0.491522	1
ENSG00000189337	KAZN	KAZRN_HUMAN	Q674X7	A_24_P331830	-0.2165	7.41219	-2.5983	0.0194985	0.491522	1
ENSG00000172765	DKFZp686H13261	TMCC1_HUMAN	O94876	A_32_P41065	0.233529	10.0788	2.59829	0.0194986	0.491522	1
ENSG00000172765	TMCC1	TMCC1_HUMAN	O94876	A_32_P41065	0.233529	10.0788	2.59829	0.0194986	0.491522	1
ENSG00000141736	ERBB2	ERBB2_HUMAN	P04626	A_23_P89249	-0.232487	12.4306	-2.59718	0.0195427	0.491522	1
ENSG00000103319	EEF2K	EF2K_HUMAN	O00418	A_24_P125067	-0.224979	8.38943	-2.59657	0.0195666	0.491522	1
ENSG00000224637	-	-	-	A_32_P69536	-0.257325	7.42751	-2.59646	0.0195709	0.491522	1
ENSG00000272031	ANKRD34A	AN34A_HUMAN	Q69YU3	A_24_P212811	0.20803	7.57177	2.59643	0.0195721	0.491522	1
ENSG00000115844	DLX2	DLX2_HUMAN	Q07687	A_23_P28595	-0.191735	7.28944	-2.59578	0.019598	0.491522	1
ENSG00000119185	ITGB1BP1	ITBP1_HUMAN	O14713	A_23_P154507	0.207931	11.7411	2.59486	0.0196344	0.491522	1
ENSG00000255397	-	-	-	A_23_P34800	-0.190804	13.2631	-2.59455	0.019647	0.491522	1
ENSG00000132780	NASP	NASP_HUMAN	P49321	A_23_P34800	-0.190804	13.2631	-2.59455	0.019647	0.491522	1
ENSG00000269713	NBPF9	-	-	A_32_P27020	0.278569	12.3029	2.59451	0.0196486	0.491522	1
ENSG00000268043	NBPF12	-	-	A_32_P27020	0.278569	12.3029	2.59451	0.0196486	0.491522	1
ENSG00000263956	NBPF11	NBPFB_HUMAN	Q86T75	A_32_P27020	0.278569	12.3029	2.59451	0.0196486	0.491522	1
ENSG00000270231	-	-	-	A_32_P27020	0.278569	12.3029	2.59451	0.0196486	0.491522	1
ENSG00000162825	NBPF8	-	-	A_32_P27020	0.278569	12.3029	2.59451	0.0196486	0.491522	1
ENSG00000272150	-	-	-	A_32_P27020	0.278569	12.3029	2.59451	0.0196486	0.491522	1
ENSG00000266338	NBPF15	NBPFF_HUMAN	Q8N660	A_32_P27020	0.278569	12.3029	2.59451	0.0196486	0.491522	1
ENSG00000271383	NBPF14	-	-	A_32_P27020	0.278569	12.3029	2.59451	0.0196486	0.491522	1
ENSG00000273136	NBPF26	-	-	A_32_P27020	0.278569	12.3029	2.59451	0.0196486	0.491522	1
ENSG00000179387	ELMOD2	ELMD2_HUMAN	Q8IZ81	A_23_P305692	0.177456	7.836	2.59374	0.0196791	0.491522	1
ENSG00000171310	CHST11	CHSTB_HUMAN	Q9NPF2	A_32_P99171	0.241298	9.51824	2.59374	0.0196792	0.491522	1
ENSG00000142632	ARHGEF19	ARHGJ_HUMAN	Q8IW93	A_23_P332326	-0.229553	10.1627	-2.5937	0.0196806	0.491522	1
ENSG00000141161	UNC45B	UN45B_HUMAN	Q8IWX7	A_23_P49677	0.237103	7.1116	2.59321	0.0197003	0.491522	1
ENSG00000130234	ACE2	ACE2_HUMAN	Q9BYF1	A_23_P252981	0.32805	8.74096	2.5932	0.0197007	0.491522	1
ENSG00000099889	ARVCF	ARVC_HUMAN	O00192	A_24_P416961	0.377377	8.59541	2.59308	0.0197057	0.491522	1
ENSG00000118160	SLC8A2	NAC2_HUMAN	Q9UPR5	A_23_P336954	0.266049	7.79292	2.59273	0.0197197	0.491522	1
ENSG00000185053	SGCZ	SGCZ_HUMAN	Q96LD1	A_23_P373584	0.244689	6.84389	2.59232	0.019736	0.491522	1
ENSG00000127831	VIL1	VILI_HUMAN	P09327	A_23_P209527	0.286	11.4807	2.59197	0.01975	0.491574	1
ENSG00000110042	DTX4	DTX4_HUMAN	Q9Y2E6	A_24_P158718	0.214847	7.94537	2.59064	0.019803	0.492593	1
ENSG00000235618	-	-	-	A_24_P677642	0.220326	8.66327	2.58915	0.0198629	0.49304	1
ENSG00000162892	IL24	IL24_HUMAN	Q13007	A_24_P222740	0.239407	6.97762	2.58912	0.0198642	0.49304	1
ENSG00000101680	LAMA1	LAMA1_HUMAN	P25391	A_32_P313405	0.387577	12.357	2.58879	0.0198773	0.49304	1
ENSG00000183625	CCR3	CCR3_HUMAN	P51677	A_23_P250302	0.214789	6.87621	2.58841	0.0198928	0.49304	1
ENSG00000244754	N4BP2L2	N42L2_HUMAN	Q92802	A_23_P65262	0.214468	8.1678	2.58825	0.0198992	0.49304	1
ENSG00000143476	DTL	DTL_HUMAN	Q9NZJ0	A_23_P10385	-0.192889	10.4615	-2.58788	0.019914	0.49304	1
ENSG00000071575	TRIB2	TRIB2_HUMAN	Q92519	A_23_P90696	-0.319406	9.15313	-2.58761	0.0199249	0.49304	1
ENSG00000163568	AIM2	AIM2_HUMAN	O14862	A_32_P44394	0.211237	8.77435	2.58638	0.0199747	0.493059	1
ENSG00000124177	CHD6	CHD6_HUMAN	Q8TD26	A_23_P91217	-0.23398	7.94996	-2.58636	0.0199753	0.493059	1
ENSG00000164114	MAP9	MAP9_HUMAN	Q49MG5	A_32_P50066	0.244026	10.5814	2.58561	0.0200059	0.493059	1
ENSG00000143614	GATAD2B	P66B_HUMAN	Q8WXI9	A_23_P386509	-0.214274	7.9104	-2.58515	0.0200245	0.493059	1
ENSG00000176148	TCP11L1	T11L1_HUMAN	Q9NUJ3	A_23_P47247	0.296974	10.4232	2.58506	0.0200281	0.493059	1
ENSG00000110400	PVRL1	PVRL1_HUMAN	Q15223	A_24_P50890	-0.296778	11.3257	-2.58496	0.020032	0.493059	1
ENSG00000140382	HMG20A	HM20A_HUMAN	Q9NP66	A_23_P206084	0.234345	9.21434	2.58492	0.0200339	0.493059	1
ENSG00000123358	NR4A1	NR4A1_HUMAN	P22736	A_23_P128230	0.265716	11.0113	2.58454	0.0200492	0.493059	1
ENSG00000174132	FAM174A	F174A_HUMAN	Q8TBP5	A_23_P30283	0.222103	8.98045	2.58339	0.0200959	0.493059	1
ENSG00000127325	BEST3	BEST3_HUMAN	Q8N1M1	A_23_P150963	0.187079	8.3263	2.58297	0.0201131	0.493059	1
ENSG00000114650	SCAP	SCAP_HUMAN	Q12770	A_23_P252825	-0.194474	11.5409	-2.58279	0.0201204	0.493059	1
ENSG00000273312	-	-	-	A_24_P119634	-0.287787	6.83493	-2.58254	0.0201304	0.493059	1
ENSG00000105711	SCN1B	SCN1B_HUMAN	Q07699	A_23_P79015	-0.216135	7.09579	-2.58241	0.0201358	0.493059	1
ENSG00000166323	C11orf65	CK065_HUMAN	Q8NCR3	A_23_P418485	0.234181	7.98659	2.58164	0.0201671	0.493059	1
ENSG00000020129	NCDN	NCDN_HUMAN	Q9UBB6	A_23_P97736	-0.196805	9.49584	-2.58099	0.0201936	0.493059	1
ENSG00000132561	MATN2	MATN2_HUMAN	O00339	A_23_P71328	-0.349693	8.49422	-2.58027	0.020223	0.493059	1
ENSG00000204482	LST1	-	-	A_24_P103469	-0.270959	7.06925	-2.57985	0.0202403	0.493059	1
ENSG00000156345	CDK20	CDK20_HUMAN	Q8IZL9	A_23_P20752	0.214666	9.75006	2.57953	0.0202533	0.493059	1
ENSG00000262402	-	-	-	A_24_P290188	0.285537	8.12916	2.57941	0.0202584	0.493059	1
ENSG00000174628	IQCK	IQCK_HUMAN	Q8N0W5	A_32_P35847	-0.25077	8.21987	-2.57939	0.0202593	0.493059	1
ENSG00000214681	IQCF5	IQCF5_HUMAN	A8MTL0	A_23_P29608	-0.211713	7.04305	-2.57896	0.0202768	0.493059	1
ENSG00000224281	-	-	-	A_23_P384825	0.21306	7.04846	2.57871	0.0202869	0.493059	1
ENSG00000140832	MARVELD3	MALD3_HUMAN	Q96A59	A_23_P152428	-0.308647	8.38889	-2.57861	0.0202909	0.493059	1
ENSG00000181751	C5orf30	CE030_HUMAN	Q96GV9	A_23_P122007	0.251288	10.7746	2.57851	0.020295	0.493059	1
ENSG00000173930	SLCO4C1	SO4C1_HUMAN	Q6ZQN7	A_24_P101941	-0.25546	6.92863	-2.57824	0.0203063	0.493059	1
ENSG00000233838	-	-	-	A_23_P258814	0.188421	11.1111	2.57816	0.0203097	0.493059	1
ENSG00000136044	APPL2	DP13B_HUMAN	Q8NEU8	A_23_P105747	-0.205439	8.3804	-2.57756	0.020334	0.493059	1
ENSG00000135002	RFK	RIFK_HUMAN	Q969G6	A_23_P216708	0.228299	10.0609	2.57747	0.020338	0.493059	1
ENSG00000160293	VAV2	VAV2_HUMAN	P52735	A_23_P146468	-0.246807	7.46109	-2.57701	0.0203569	0.493059	1
ENSG00000156411	C14orf2	68MP_HUMAN	P56378	A_23_P205281	0.268659	13.8143	2.57677	0.0203668	0.493059	1
ENSG00000156411	MP68	68MP_HUMAN	P56378	A_23_P205281	0.268659	13.8143	2.57677	0.0203668	0.493059	1
ENSG00000278266	-	-	-	A_32_P171427	-0.258463	6.88419	-2.57619	0.0203907	0.493064	1
ENSG00000183625	CCR3	CCR3_HUMAN	P51677	A_24_P367473	0.207236	7.54096	2.57575	0.0204087	0.493064	1
ENSG00000136425	CIB2	CIB2_HUMAN	O75838	A_23_P65890	-0.282719	11.5398	-2.57523	0.0204302	0.493064	1
ENSG00000155833	CYLC2	CYLC2_HUMAN	Q14093	A_24_P158285	-0.290181	6.95252	-2.57492	0.020443	0.493064	1
ENSG00000143013	LMO4	LMO4_HUMAN	P61968	A_23_P380181	-0.278931	11.1259	-2.57452	0.0204595	0.493064	1
ENSG00000184117	NIPSNAP1	NIPS1_HUMAN	Q9BPW8	A_24_P237278	-0.291783	10.1134	-2.57451	0.0204598	0.493064	1
ENSG00000138821	SLC39A8	S39A8_HUMAN	Q9C0K1	A_23_P41424	0.240878	12.342	2.57387	0.0204865	0.493064	1
ENSG00000172987	HPSE2	HPSE2_HUMAN	Q8WWQ2	A_24_P103893	-0.199845	7.00129	-2.57379	0.0204897	0.493064	1
ENSG00000181773	GPR3	GPR3_HUMAN	P46089	A_23_P35000	-0.194475	7.21256	-2.57359	0.020498	0.493064	1
ENSG00000100292	HMOX1	HMOX1_HUMAN	P09601	A_23_P120883	-0.344384	9.82464	-2.57252	0.0205424	0.493138	1
ENSG00000164830	OXR1	OXR1_HUMAN	Q8N573	A_24_P163632	-0.244531	7.64173	-2.57239	0.0205481	0.493138	1
ENSG00000198681	MAGEA1	MAGA1_HUMAN	P43355	A_23_P96291	0.250099	6.91254	2.57224	0.0205542	0.493138	1
ENSG00000250305	KIAA1456	K1456_HUMAN	Q9P272	A_32_P159234	0.317499	7.69558	2.57217	0.0205569	0.493138	1
ENSG00000140931	CMTM3	CKLF3_HUMAN	Q96MX0	A_23_P88865	0.208129	14.4612	2.5714	0.0205889	0.493242	1
ENSG00000224871	-	-	-	A_24_P874052	0.269207	6.95174	2.57052	0.0206258	0.493311	1
ENSG00000225261	-	-	-	A_24_P874052	0.269207	6.95174	2.57052	0.0206258	0.493311	1
ENSG00000107562	CXCL12	SDF1_HUMAN	P48061	A_23_P202448	-0.237824	8.3819	-2.56998	0.0206481	0.493311	1
ENSG00000221949	LINC01465	CL061_HUMAN	Q8N7H1	A_32_P886589	-0.207213	6.99102	-2.56958	0.0206649	0.493311	1
ENSG00000112183	RBM24	RBM24_HUMAN	Q9BX46	A_23_P167812	0.275755	8.91755	2.56919	0.0206812	0.493311	1
ENSG00000176393	RNPEP	AMPB_HUMAN	Q9H4A4	A_23_P97770	-0.223643	9.73231	-2.56908	0.0206857	0.493311	1
ENSG00000156531	PHF6	PHF6_HUMAN	Q8IWS0	A_32_P229299	0.18558	9.96849	2.56873	0.0207004	0.493311	1
ENSG00000115806	GORASP2	GORS2_HUMAN	Q9H8Y8	A_24_P328320	-0.219844	8.10855	-2.5675	0.0207518	0.493311	1
ENSG00000228002	-	-	-	A_24_P808534	-0.198766	9.28723	-2.56747	0.0207532	0.493311	1
ENSG00000171763	SPATA5L1	SPA5L_HUMAN	Q9BVQ7	A_23_P37424	0.193712	10.4464	2.56619	0.0208069	0.493311	1
ENSG00000142864	SERBP1	PAIRB_HUMAN	Q8NC51	A_32_P187599	-0.254107	13.8821	-2.56588	0.0208199	0.493311	1
ENSG00000249565	-	-	-	A_32_P187599	-0.254107	13.8821	-2.56588	0.0208199	0.493311	1
ENSG00000175518	UBQLNL	UBQLN_HUMAN	Q8IYU4	A_23_P328621	-0.207638	7.15861	-2.56526	0.0208462	0.493311	1
ENSG00000128641	MYO1B	MYO1B_HUMAN	O43795	A_23_P361049	0.202324	10.7766	2.56444	0.0208807	0.493311	1
ENSG00000008294	SPAG9	JIP4_HUMAN	O60271	A_24_P942469	0.229658	9.7694	2.5637	0.0209116	0.493311	1
ENSG00000151135	TMEM263	TM263_HUMAN	Q8WUH6	A_23_P410613	0.217114	10.8747	2.56365	0.0209138	0.493311	1
ENSG00000066056	TIE1	TIE1_HUMAN	P35590	A_23_P126416	-0.211911	7.15484	-2.56333	0.0209274	0.493311	1
ENSG00000117533	VAMP4	VAMP4_HUMAN	O75379	A_24_P942030	0.210755	7.37022	2.56317	0.0209343	0.493311	1
ENSG00000148154	UGCG	CEGT_HUMAN	Q16739	A_23_P313389	-0.229513	10.2299	-2.56311	0.0209367	0.493311	1
ENSG00000176956	LY6H	LY6H_HUMAN	O94772	A_23_P134914	-0.292471	7.0649	-2.56275	0.0209521	0.493311	1
ENSG00000183549	ACSM5	ACSM5_HUMAN	Q6NUN0	A_24_P367776	0.32437	6.99001	2.56266	0.0209556	0.493311	1
ENSG00000034510	TMSB10	TYB10_HUMAN	P63313	A_23_P68106	0.208653	16.0121	2.56162	0.0209996	0.493311	1
ENSG00000053254	FOXN3	FOXN3_HUMAN	O00409	A_23_P140405	-0.228812	12.7985	-2.56121	0.0210174	0.493311	1
ENSG00000113645	WWC1	KIBRA_HUMAN	Q8IX03	A_23_P81392	-0.231874	9.72951	-2.56082	0.0210337	0.493311	1
ENSG00000186635	ARAP1	ARAP1_HUMAN	Q96P48	A_24_P925241	0.213976	7.84306	2.56074	0.0210371	0.493311	1
ENSG00000214530	STARD10	PCTL_HUMAN	Q9Y365	A_24_P925241	0.213976	7.84306	2.56074	0.0210371	0.493311	1
ENSG00000182793	GSTA5	GSTA5_HUMAN	Q7RTV2	A_23_P93141	0.220346	8.1814	2.56067	0.0210402	0.493311	1
ENSG00000135423	GLS2	GLSL_HUMAN	Q9UI32	A_24_P326739	-0.294106	7.95692	-2.56028	0.0210568	0.493311	1
ENSG00000097033	SH3GLB1	SHLB1_HUMAN	Q9Y371	A_23_P22957	0.236409	12.4641	2.56012	0.0210637	0.493311	1
ENSG00000146416	AIG1	AIG1_HUMAN	Q9NVV5	A_23_P93431	-0.329427	10.1235	-2.56001	0.0210681	0.493311	1
ENSG00000182372	CLN8	CLN8_HUMAN	Q9UBY8	A_23_P407206	0.314691	8.76378	2.55989	0.0210735	0.493311	1
ENSG00000181396	OGFOD3	OGFD3_HUMAN	Q6PK18	A_24_P940790	0.210169	10.8081	2.55977	0.0210784	0.493311	1
ENSG00000072422	RHOBTB1	RHBT1_HUMAN	O94844	A_24_P158536	-0.326929	7.95042	-2.55905	0.0211093	0.493311	1
ENSG00000241258	CRCP	RPC9_HUMAN	O75575	A_23_P134573	-0.348404	9.70778	-2.55894	0.0211136	0.493311	1
ENSG00000249319	-	-	-	A_23_P134573	-0.348404	9.70778	-2.55894	0.0211136	0.493311	1
ENSG00000077348	EXOSC5	EXOS5_HUMAN	Q9NQT4	A_24_P211151	-0.236249	9.49385	-2.55889	0.0211158	0.493311	1
ENSG00000138495	COX17	COX17_HUMAN	Q14061	A_23_P65157	0.205451	13.8439	2.55887	0.0211168	0.493311	1
ENSG00000205105	-	-	-	A_23_P65157	0.205451	13.8439	2.55887	0.0211168	0.493311	1
ENSG00000134644	PUM1	PUM1_HUMAN	Q14671	A_24_P171345	-0.218107	10.6574	-2.5584	0.0211367	0.493311	1
ENSG00000108175	ZMIZ1	ZMIZ1_HUMAN	Q9ULJ6	A_23_P138435	0.202155	11.1809	2.5583	0.0211409	0.493311	1
ENSG00000185664	PMEL	PMEL_HUMAN	P40967	A_23_P2233	-0.266243	11.5011	-2.55825	0.0211434	0.493311	1
ENSG00000187902	SHISA7	SHSA7_HUMAN	A6NL88	A_24_P161581	0.197163	8.02663	2.55821	0.0211451	0.493311	1
ENSG00000131507	NDFIP1	NFIP1_HUMAN	Q9BT67	A_23_P81241	0.189215	11.7911	2.55803	0.0211524	0.493311	1
ENSG00000160323	ADAMTS13	ATS13_HUMAN	Q76LX8	A_24_P172304	0.211187	7.38945	2.55705	0.0211943	0.493756	1
ENSG00000259306	-	-	-	A_32_P128280	0.201468	7.13079	2.55703	0.0211955	0.493756	1
ENSG00000104368	PLAT	TPA_HUMAN	P00750	A_23_P82868	-0.296574	7.98736	-2.55658	0.0212144	0.493916	1
ENSG00000141956	PRDM15	PRD15_HUMAN	P57071	A_32_P145989	-0.190262	7.03654	-2.556	0.0212394	0.494218	1
ENSG00000141956	ZNF298	PRD15_HUMAN	P57071	A_32_P145989	-0.190262	7.03654	-2.556	0.0212394	0.494218	1
ENSG00000162927	PUS10	PUS10_HUMAN	Q3MIT2	A_23_P412029	-0.236081	7.19972	-2.55523	0.0212726	0.494712	1
ENSG00000111237	VPS29	VPS29_HUMAN	Q9UBQ0	A_24_P175989	0.259024	11.4784	2.55362	0.0213417	0.496037	1
ENSG00000196961	AP2A1	AP2A1_HUMAN	O95782	A_23_P4885	-0.23381	9.2652	-2.55309	0.0213645	0.496287	1
ENSG00000146215	CRIP3	CRIP3_HUMAN	Q6Q6R5	A_23_P156562	-0.274429	8.33965	-2.55233	0.0213972	0.496628	1
ENSG00000233236	-	-	-	A_32_P142836	0.207315	7.1372	2.55219	0.0214033	0.496628	1
ENSG00000157224	CLDN12	CLD12_HUMAN	P56749	A_23_P168656	0.219594	10.2059	2.55143	0.021436	0.496768	1
ENSG00000105793	GTPBP10	GTPBA_HUMAN	A4D1E9	A_23_P168656	0.219594	10.2059	2.55143	0.021436	0.496768	1
ENSG00000159131	GART	PUR2_HUMAN	P22102	A_24_P239140	-0.262096	8.84151	-2.55131	0.0214413	0.496768	1
ENSG00000172020	GAP43	NEUM_HUMAN	P17677	A_23_P253446	-0.385308	8.82472	-2.55086	0.0214608	0.496768	1
ENSG00000158457	TSPAN33	TSN33_HUMAN	Q86UF1	A_24_P365901	-0.239252	9.60392	-2.5506	0.021472	0.496768	1
ENSG00000167487	KLHL26	KLH26_HUMAN	Q53HC5	A_23_P39375	-0.203399	8.0069	-2.55044	0.021479	0.496768	1
ENSG00000196141	DKFZP564A2416	SPS2L_HUMAN	Q9NUQ6	A_23_P131255	-0.475403	13.541	-2.54932	0.0215278	0.496768	1
ENSG00000196141	SPATS2L	SPS2L_HUMAN	Q9NUQ6	A_23_P131255	-0.475403	13.541	-2.54932	0.0215278	0.496768	1
ENSG00000263900	-	-	-	A_23_P135769	-0.327431	13.662	-2.54927	0.0215299	0.496768	1
ENSG00000213763	-	-	-	A_23_P135769	-0.327431	13.662	-2.54927	0.0215299	0.496768	1
ENSG00000184188	-	-	-	A_23_P135769	-0.327431	13.662	-2.54927	0.0215299	0.496768	1
ENSG00000075624	ACTB	ACTB_HUMAN	P60709	A_23_P135769	-0.327431	13.662	-2.54927	0.0215299	0.496768	1
ENSG00000220267	-	-	-	A_23_P135769	-0.327431	13.662	-2.54927	0.0215299	0.496768	1
ENSG00000075340	ADD2	ADDB_HUMAN	P35612	A_23_P421436	-0.238534	8.05755	-2.54909	0.0215377	0.496768	1
ENSG00000162430	SEPN1	SELN_HUMAN	Q9NZV5	A_24_P231250	-0.215926	8.7941	-2.54906	0.0215388	0.496768	1
ENSG00000114353	GNAI2	GNAI2_HUMAN	P04899	A_23_P144113	-0.222361	11.5537	-2.54884	0.0215483	0.496768	1
ENSG00000264522	OTUD7B	OTU7B_HUMAN	Q6GQQ9	A_23_P138157	0.254379	8.06929	2.54698	0.0216295	0.496768	1
ENSG00000105877	DNAH11	DYH11_HUMAN	Q96DT5	A_32_P19806	-0.291697	7.85789	-2.54672	0.0216409	0.496768	1
ENSG00000151327	FAM177A1	F177A_HUMAN	Q8N128	A_32_P18357	-0.204129	7.19302	-2.54671	0.0216412	0.496768	1
ENSG00000162913	C1orf145	CA145_HUMAN	Q96MR7	A_32_P203126	-0.29653	7.05796	-2.54655	0.0216482	0.496768	1
ENSG00000100101	-	-	-	A_23_P17855	-0.219154	9.94301	-2.54652	0.0216494	0.496768	1
ENSG00000100106	TRIOBP	TARA_HUMAN	Q9H2D6	A_23_P17855	-0.219154	9.94301	-2.54652	0.0216494	0.496768	1
ENSG00000026559	KCNG1	KCNG1_HUMAN	Q9UIX4	A_23_P210581	0.267368	13.3005	2.54638	0.0216558	0.496768	1
ENSG00000125821	DTD1	DTD1_HUMAN	Q8TEA8	A_23_P17512	-0.212203	12.6351	-2.54629	0.0216595	0.496768	1
ENSG00000124702	KLHDC3	KLDC3_HUMAN	Q9BQ90	A_24_P343255	-0.208225	10.227	-2.54605	0.0216699	0.496768	1
ENSG00000163081	CCDC140	CC140_HUMAN	Q96MF4	A_23_P429478	0.209244	7.06429	2.54546	0.0216958	0.496768	1
ENSG00000259953	-	-	-	A_24_P509893	-0.218648	7.10828	-2.54515	0.0217093	0.496768	1
ENSG00000159231	CBR3	CBR3_HUMAN	O75828	A_23_P40453	-0.282924	7.46397	-2.54492	0.0217196	0.496768	1
ENSG00000085552	IGSF9	TUTLA_HUMAN	Q9P2J2	A_23_P85441	-0.20881	10.7482	-2.54432	0.0217457	0.496768	1
ENSG00000167780	SOAT2	SOAT2_HUMAN	O75908	A_23_P25475	0.233242	7.23796	2.5443	0.0217468	0.496768	1
ENSG00000071537	SEL1L	SE1L1_HUMAN	Q9UBV2	A_23_P88411	0.280511	10.151	2.54349	0.0217823	0.496768	1
ENSG00000088325	TPX2	TPX2_HUMAN	Q9ULW0	A_23_P68610	-0.238939	11.8438	-2.5434	0.0217862	0.496768	1
ENSG00000199179	-	-	-	A_32_P13991	0.334214	9.02039	2.54306	0.0218012	0.496768	1
ENSG00000275180	-	-	-	A_32_P13991	0.334214	9.02039	2.54306	0.0218012	0.496768	1
ENSG00000061987	MON2	MON2_HUMAN	Q7Z3U7	A_32_P13991	0.334214	9.02039	2.54306	0.0218012	0.496768	1
ENSG00000108518	PFN1	PROF1_HUMAN	P07737	A_23_P27096	-0.326368	13.0399	-2.54279	0.021813	0.496768	1
ENSG00000233328	-	-	-	A_23_P27096	-0.326368	13.0399	-2.54279	0.021813	0.496768	1
ENSG00000167491	GATAD2A	P66A_HUMAN	Q86YP4	A_23_P131020	-0.257531	10.3854	-2.54269	0.0218172	0.496768	1
ENSG00000070778	PTPN21	PTN21_HUMAN	Q16825	A_24_P255829	-0.210215	6.92796	-2.54268	0.0218178	0.496768	1
ENSG00000131738	KRT33B	KT33B_HUMAN	Q14525	A_23_P89665	0.255228	7.12896	2.54252	0.021825	0.496768	1
ENSG00000104047	DTWD1	DTWD1_HUMAN	Q8N5C7	A_23_P3212	0.202153	9.72133	2.5425	0.0218256	0.496768	1
ENSG00000204637	-	-	-	A_24_P195205	0.250976	8.51047	2.54222	0.0218378	0.496768	1
ENSG00000075151	EIF4G3	IF4G3_HUMAN	O43432	A_23_P126241	-0.239875	11.1639	-2.54128	0.0218792	0.496768	1
ENSG00000115306	SPTBN1	SPTB2_HUMAN	Q01082	A_23_P102523	-0.222404	9.16976	-2.5412	0.0218827	0.496768	1
ENSG00000157870	FAM213B	PGFS_HUMAN	Q8TBF2	A_32_P84289	-0.205243	10.2641	-2.54018	0.021928	0.496768	1
ENSG00000103316	CRYM	CRYM_HUMAN	Q14894	A_23_P77731	-0.296469	11.0084	-2.53976	0.0219464	0.496768	1
ENSG00000065534	MYLK	MYLK_HUMAN	Q15746	A_23_P143817	-0.229671	9.06921	-2.53902	0.0219792	0.496768	1
ENSG00000129292	PHF20L1	P20L1_HUMAN	A8MW92	A_24_P389348	-0.187635	8.09017	-2.53856	0.0219995	0.496768	1
ENSG00000006831	ADIPOR2	ADR2_HUMAN	Q86V24	A_23_P48121	0.189917	11.4489	2.53853	0.022001	0.496768	1
ENSG00000232389	-	-	-	A_32_P50452	-0.366689	10.6878	-2.53835	0.0220089	0.496768	1
ENSG00000102172	SMS	SPSY_HUMAN	P52788	A_32_P50452	-0.366689	10.6878	-2.53835	0.0220089	0.496768	1
ENSG00000120210	INSL6	INSL6_HUMAN	Q9Y581	A_23_P83012	-0.258412	6.82871	-2.53805	0.0220222	0.496768	1
ENSG00000124882	EREG	EREG_HUMAN	O14944	A_24_P217520	-0.329762	6.98241	-2.53771	0.0220373	0.496768	1
ENSG00000088247	KHSRP	FUBP2_HUMAN	Q92945	A_23_P16157	-0.207252	14.6707	-2.53742	0.0220502	0.496768	1
ENSG00000166974	MAPRE2	MARE2_HUMAN	Q15555	A_23_P89835	-0.213795	8.30221	-2.53732	0.0220547	0.496768	1
ENSG00000090530	LEPREL1	P3H2_HUMAN	Q8IVL5	A_23_P69179	0.265402	15.7221	2.5372	0.0220602	0.496768	1
ENSG00000126561	STAT5A	STA5A_HUMAN	P42229	A_23_P207367	0.262027	7.20359	2.53707	0.0220658	0.496768	1
ENSG00000164764	SBSPON	SBSPO_HUMAN	Q8IVN8	A_32_P30330	-0.203656	7.33322	-2.5369	0.0220733	0.496768	1
ENSG00000164258	NDUFS4	NDUS4_HUMAN	O43181	A_23_P257198	0.199016	13.4707	2.53662	0.0220858	0.496768	1
ENSG00000100744	GSKIP	GSKIP_HUMAN	Q9P0R6	A_23_P205336	0.191449	12.7558	2.53661	0.0220864	0.496768	1
ENSG00000104043	ATP8B4	AT8B4_HUMAN	Q8TF62	A_23_P163216	0.231752	6.91533	2.53621	0.0221042	0.496818	1
ENSG00000133574	GIMAP4	GIMA4_HUMAN	Q9NUV9	A_24_P209455	0.275148	7.08607	2.53601	0.0221128	0.496818	1
ENSG00000138738	PRDM5	PRDM5_HUMAN	Q9NQX1	A_23_P362759	-0.264432	8.29366	-2.53539	0.0221405	0.49717	1
ENSG00000109321	AREG	AREG_HUMAN	P15514	A_23_P259071	0.249624	7.38904	2.53454	0.0221784	0.497401	1
ENSG00000109321	AREGB	AREG_HUMAN	P15514	A_23_P259071	0.249624	7.38904	2.53454	0.0221784	0.497401	1
ENSG00000266495	-	-	-	A_32_P228570	0.238788	8.5544	2.53423	0.0221925	0.497401	1
ENSG00000136877	FPGS	FOLC_HUMAN	Q05932	A_23_P9465	-0.241452	10.4936	-2.53411	0.0221979	0.497401	1
ENSG00000124201	ZNFX1	ZNFX1_HUMAN	Q9P2E3	A_24_P23034	-0.196275	7.83674	-2.53383	0.0222102	0.497401	1
ENSG00000214286	-	-	-	A_24_P837537	0.245727	8.64879	2.53381	0.0222113	0.497401	1
ENSG00000206990	-	-	-	A_24_P385280	-0.194139	10.2116	-2.53249	0.0222702	0.498447	1
ENSG00000143149	ALDH9A1	AL9A1_HUMAN	P49189	A_24_P385280	-0.194139	10.2116	-2.53249	0.0222702	0.498447	1
ENSG00000140519	RHCG	RHCG_HUMAN	Q9UBD6	A_23_P151975	-0.218072	7.10916	-2.53222	0.0222825	0.49845	1
ENSG00000136488	CSH1	CSH1_HUMAN	P0DML2	A_23_P381347	-0.376247	7.93984	-2.5316	0.0223103	0.498526	1
ENSG00000213218	CSH1	CSH2_HUMAN	P0DML3	A_23_P381347	-0.376247	7.93984	-2.5316	0.0223103	0.498526	1
ENSG00000213218	CSH2	CSH2_HUMAN	P0DML3	A_23_P381347	-0.376247	7.93984	-2.5316	0.0223103	0.498526	1
ENSG00000073756	COX-2	PGH2_HUMAN	P35354	A_24_P77008	-0.24744	7.07319	-2.5315	0.0223146	0.498526	1
ENSG00000073756	PTGS2	PGH2_HUMAN	P35354	A_24_P77008	-0.24744	7.07319	-2.5315	0.0223146	0.498526	1
ENSG00000244157	-	-	-	A_24_P118512	0.232585	7.66055	2.53133	0.0223222	0.498526	1
ENSG00000186314	PRELID2	PRLD2_HUMAN	Q8N945	A_24_P346101	-0.163957	7.68305	-2.53041	0.0223637	0.49901	1
ENSG00000179611	-	-	-	A_23_P127627	-0.199303	8.7498	-2.53015	0.0223755	0.49901	1
ENSG00000149091	DGKZ	DGKZ_HUMAN	Q13574	A_23_P127627	-0.199303	8.7498	-2.53015	0.0223755	0.49901	1
ENSG00000143549	TPM3	TPM3_HUMAN	P06753	A_23_P310222	-0.182735	13.4433	-2.52979	0.0223916	0.49901	1
ENSG00000129691	ASH2L	ASH2L_HUMAN	Q9UBL3	A_23_P134827	0.244646	13.4298	2.52968	0.0223966	0.49901	1
ENSG00000215004	-	-	-	A_24_P489649	-0.214765	7.36207	-2.52913	0.0224214	0.49901	1
ENSG00000276399	-	-	-	A_24_P944096	0.208931	7.02638	2.52896	0.0224289	0.49901	1
ENSG00000064655	EYA2	EYA2_HUMAN	O00167	A_23_P319859	0.254555	10.5654	2.52813	0.0224666	0.499577	1
ENSG00000179057	IGSF22	IGS22_HUMAN	Q8N9C0	A_32_P486620	-0.22985	7.03157	-2.52689	0.0225226	0.500553	1
ENSG00000096264	NCR2	NCTR2_HUMAN	O95944	A_23_P413224	0.177105	7.14056	2.52594	0.022566	0.501246	1
ENSG00000130402	ACTN4	ACTN4_HUMAN	O43707	A_23_P101655	-0.238764	11.4095	-2.52547	0.0225874	0.501451	1
ENSG00000237580	-	-	-	A_24_P696507	0.201868	12.6354	2.52478	0.0226186	0.501517	1
ENSG00000023228	NDUFS1	NDUS1_HUMAN	P28331	A_24_P696507	0.201868	12.6354	2.52478	0.0226186	0.501517	1
ENSG00000136770	DNAJC1	DNJC1_HUMAN	Q96KC8	A_23_P127128	0.216679	11.7733	2.5246	0.022627	0.501517	1
ENSG00000047346	FAM214A	F214A_HUMAN	Q32MH5	A_24_P357576	0.256726	10.5573	2.52361	0.0226718	0.501693	1
ENSG00000131196	NFATC1	NFAC1_HUMAN	O95644	A_23_P300150	0.329487	10.0448	2.52332	0.0226852	0.501693	1
ENSG00000204666	-	-	-	A_32_P215100	-0.23502	7.0429	-2.52318	0.0226917	0.501693	1
ENSG00000121933	ADORA3	AA3RB_HUMAN	Q6P2N6	A_23_P137931	-0.25508	6.923	-2.52231	0.0227312	0.501693	1
ENSG00000121933	ADORA3	AA3R_HUMAN	P33765	A_23_P137931	-0.25508	6.923	-2.52231	0.0227312	0.501693	1
ENSG00000063046	EIF4B	IF4B_HUMAN	P23588	A_24_P218970	-0.528821	10.4197	-2.52227	0.0227329	0.501693	1
ENSG00000138119	MYOF	MYOF_HUMAN	Q9NZM1	A_23_P86682	0.304503	11.9164	2.52187	0.0227512	0.501693	1
ENSG00000111670	GNPTAB	GNPTA_HUMAN	Q3T906	A_23_P204380	-0.289066	8.44662	-2.52173	0.0227578	0.501693	1
ENSG00000176171	BNIP3	BNIP3_HUMAN	Q12983	A_23_P138635	0.270428	14.0921	2.52138	0.0227741	0.501693	1
ENSG00000254093	PINX1	PINX1_HUMAN	Q96BK5	A_23_P82823	-0.294524	10.4313	-2.52136	0.022775	0.501693	1
ENSG00000064655	EYA2	EYA2_HUMAN	O00167	A_23_P500421	0.291355	11.3626	2.52091	0.0227954	0.501693	1
ENSG00000149201	CCDC81	CCD81_HUMAN	Q6ZN84	A_23_P128008	0.183369	7.65517	2.52088	0.0227967	0.501693	1
ENSG00000130517	PGPEP1	PGPI_HUMAN	Q9NXJ5	A_23_P22854	-0.214379	7.18506	-2.52045	0.0228165	0.501693	1
ENSG00000108100	CCNY	CCNY_HUMAN	Q8ND76	A_23_P300905	-0.314645	9.12764	-2.52022	0.0228269	0.501693	1
ENSG00000260065	-	-	-	A_32_P191941	-0.200932	7.17694	-2.52006	0.0228345	0.501693	1
ENSG00000237399	-	-	-	A_24_P919805	0.228813	6.95143	2.51988	0.0228425	0.501693	1
ENSG00000257773	-	-	-	A_32_P126338	-0.243567	12.8826	-2.51931	0.0228688	0.501948	1
ENSG00000100380	ST13	F10A1_HUMAN	P50502	A_32_P126338	-0.243567	12.8826	-2.51931	0.0228688	0.501948	1
ENSG00000143315	PIGM	PIGM_HUMAN	Q9H3S5	A_23_P103248	0.195061	10.2791	2.5191	0.0228785	0.501948	1
ENSG00000147400	CETN2	CETN2_HUMAN	P41208	A_23_P73493	0.192106	11.2212	2.51656	0.0229956	0.502967	1
ENSG00000268009	SSX4	SSX4_HUMAN	O60224	A_23_P33875	0.32154	11.2959	2.5164	0.0230032	0.502967	1
ENSG00000268009	SSX4B	SSX4_HUMAN	O60224	A_23_P33875	0.32154	11.2959	2.5164	0.0230032	0.502967	1
ENSG00000269791	SSX4	SSX4_HUMAN	O60224	A_23_P33875	0.32154	11.2959	2.5164	0.0230032	0.502967	1
ENSG00000269791	SSX4B	SSX4_HUMAN	O60224	A_23_P33875	0.32154	11.2959	2.5164	0.0230032	0.502967	1
ENSG00000233369	-	-	-	A_24_P803801	-0.20233	11.661	-2.5159	0.0230263	0.502967	1
ENSG00000263001	GTF2I	GTF2I_HUMAN	P78347	A_24_P803801	-0.20233	11.661	-2.5159	0.0230263	0.502967	1
ENSG00000130649	CYP2E1	CP2E1_HUMAN	P05181	A_24_P394940	-0.179112	7.08115	-2.51566	0.0230374	0.502967	1
ENSG00000154127	UBASH3B	UBS3B_HUMAN	Q8TF42	A_24_P192933	0.202062	7.15097	2.51532	0.0230532	0.502967	1
ENSG00000134318	ROCK2	ROCK2_HUMAN	O75116	A_24_P328333	-0.195048	8.07292	-2.51516	0.0230603	0.502967	1
ENSG00000155846	PPARGC1B	PRGC2_HUMAN	Q86YN6	A_32_P211188	-0.194383	7.50415	-2.51469	0.0230823	0.502967	1
ENSG00000162630	B3GALT2	B3GT2_HUMAN	O43825	A_23_P493	-0.23598	6.96205	-2.51434	0.0230988	0.502967	1
ENSG00000179833	SERTAD2	SRTD2_HUMAN	Q14140	A_24_P294124	0.211188	9.39504	2.51427	0.0231016	0.502967	1
ENSG00000136504	KAT7	KAT7_HUMAN	O95251	A_23_P152818	-0.224962	9.6686	-2.514	0.0231142	0.502967	1
ENSG00000119121	TRPM6	TRPM6_HUMAN	Q9BX84	A_24_P410463	0.26639	6.9714	2.514	0.0231143	0.502967	1
ENSG00000150867	PIP4K2A	PI42A_HUMAN	P48426	A_23_P104346	-0.233879	9.07652	-2.51351	0.0231373	0.502967	1
ENSG00000105519	CAPS	CAYP1_HUMAN	Q13938	A_23_P78958	0.204443	8.19113	2.51337	0.0231435	0.502967	1
ENSG00000079335	CDC14A	CC14A_HUMAN	Q9UNH5	A_23_P424472	-0.226995	7.17163	-2.51333	0.0231453	0.502967	1
ENSG00000233868	-	-	-	A_32_P110505	0.196771	9.85599	2.51267	0.0231763	0.503039	1
ENSG00000087087	SRRT	SRRT_HUMAN	Q9BXP5	A_23_P111487	-0.180799	9.1551	-2.51265	0.0231769	0.503039	1
ENSG00000105429	MEGF8	MEGF8_HUMAN	Q7Z7M0	A_23_P67127	-0.231841	8.53137	-2.5122	0.0231981	0.503039	1
ENSG00000167619	TMEM145	TM145_HUMAN	Q8NBT3	A_23_P67127	-0.231841	8.53137	-2.5122	0.0231981	0.503039	1
ENSG00000176623	RMDN1	RMD1_HUMAN	Q96DB5	A_23_P83493	0.19327	10.0262	2.5119	0.0232122	0.503039	1
ENSG00000089472	HEPH	HEPH_HUMAN	Q9BQS7	A_24_P399980	-0.270736	10.0235	-2.51114	0.0232478	0.503039	1
ENSG00000154548	SRSF12	SRS12_HUMAN	Q8WXF0	A_32_P456318	0.233482	8.71739	2.51047	0.0232787	0.503039	1
ENSG00000095596	CYP26A1	CP26A_HUMAN	O43174	A_23_P138655	0.23901	17.0562	2.51035	0.0232844	0.503039	1
ENSG00000173198	CYSLTR1	CLTR1_HUMAN	Q9Y271	A_24_P915225	-0.186571	6.74883	-2.51008	0.0232971	0.503039	1
ENSG00000101654	RNMT	MCES_HUMAN	O43148	A_24_P48408	0.190289	8.27406	2.50996	0.0233026	0.503039	1
ENSG00000179611	-	-	-	A_24_P103952	-0.191551	7.75902	-2.50917	0.02334	0.503039	1
ENSG00000149091	DGKZ	DGKZ_HUMAN	Q13574	A_24_P103952	-0.191551	7.75902	-2.50917	0.02334	0.503039	1
ENSG00000213853	EMP2	EMP2_HUMAN	P54851	A_23_P304682	0.18513	9.05862	2.50914	0.0233412	0.503039	1
ENSG00000236446	CT47B1	CT47B_HUMAN	P0C2W7	A_24_P221497	0.244623	7.17904	2.50904	0.0233458	0.503039	1
ENSG00000183023	SLC8A1	NAC1_HUMAN	P32418	A_32_P9737	-0.238199	6.94059	-2.50875	0.0233594	0.503039	1
ENSG00000160216	AGPAT3	PLCC_HUMAN	Q9NRZ7	A_23_P356466	0.327546	9.88675	2.50739	0.0234235	0.503257	1
ENSG00000204688	OR2H1	OR2H1_HUMAN	Q9GZK4	A_24_P940897	-0.313987	6.91405	-2.50729	0.0234281	0.503257	1
ENSG00000119912	IDE	IDE_HUMAN	P14735	A_32_P19466	-0.194722	7.61022	-2.50669	0.0234563	0.503545	1
ENSG00000196420	S100A5	S10A5_HUMAN	P33763	A_23_P115467	0.238764	8.20305	2.50586	0.0234956	0.503545	1
ENSG00000152193	RNF219	RN219_HUMAN	Q5W0B1	A_23_P25638	0.239179	10.2666	2.50581	0.0234978	0.503545	1
[truncated: 39,379 more rows]
