# Supplementary material for: Collagen Type I Improves the Differentiation of Human Embryonic Stem Cells towards Definitive Endoderm
Source: PLoS One. 2015 Dec 29;10(12):e0145389. doi: 10.1371/journal.pone.0145389 (PMC4694921; doi:10.1371/journal.pone.0145389)
Supplement: S10 Table — Gene expression in cell on Fn compared to the gene expression in cells on Fn pooled. This analysis was used to determine bias between different cultures on Fn. (XLSX) [file pone.0145389.s014.xlsx]

## Sheet: Ark1
Fn pool vs Fn
Ensembl_gene_ID	Gene_name	UniProt_ID	UniProt_accession	Probe_ID	log2 Fold Change	Average Expression	t statistic	p-Value	BH-adusted p-Value	Bonferroni corrected p-value
ENSG00000178248	-	-	-	A_32_P499005	-3.26968	6.5397	-10.316	1.92214e-08	0.000789865	0.000789865
ENSG00000155463	OXA1L	OXA1L_HUMAN	Q15070	A_23_P2998	-0.481319	11.6196	-4.40395	0.000451545	0.775433	1
ENSG00000232808	-	-	-	A_24_P298723	-0.784938	6.65384	-4.25894	0.000609866	0.775433	1
ENSG00000225560	-	-	-	A_24_P298723	-0.784938	6.65384	-4.25894	0.000609866	0.775433	1
ENSG00000228383	-	-	-	A_24_P298723	-0.784938	6.65384	-4.25894	0.000609866	0.775433	1
ENSG00000237802	-	-	-	A_24_P298723	-0.784938	6.65384	-4.25894	0.000609866	0.775433	1
ENSG00000225516	-	-	-	A_24_P298723	-0.784938	6.65384	-4.25894	0.000609866	0.775433	1
ENSG00000274196	-	-	-	A_24_P298723	-0.784938	6.65384	-4.25894	0.000609866	0.775433	1
ENSG00000230066	-	-	-	A_24_P298723	-0.784938	6.65384	-4.25894	0.000609866	0.775433	1
ENSG00000234803	-	-	-	A_24_P298723	-0.784938	6.65384	-4.25894	0.000609866	0.775433	1
ENSG00000224336	-	-	-	A_24_P298723	-0.784938	6.65384	-4.25894	0.000609866	0.775433	1
ENSG00000234830	-	-	-	A_24_P298723	-0.784938	6.65384	-4.25894	0.000609866	0.775433	1
ENSG00000146054	TRIM7	TRIM7_HUMAN	Q9C029	A_23_P30315	0.579967	7.21007	4.10694	0.000837043	0.775433	1
ENSG00000128652	HOXD3	HXD3_HUMAN	P31249	A_32_P211117	-0.569293	6.94528	-4.0945	0.000859092	0.775433	1
ENSG00000173456	RNF26	RNF26_HUMAN	Q9BY78	A_23_P64630	-0.393538	12.6406	-4.00449	0.00103703	0.775433	1
ENSG00000086015	MAST2	MAST2_HUMAN	Q6P0Q8	A_23_P126008	-0.388475	10.0096	-3.99655	0.0010544	0.775433	1
ENSG00000234616	JRK	-	-	A_32_P79492	-0.444395	6.95493	-3.92786	0.00121766	0.775433	1
ENSG00000173621	LRFN4	LRFN4_HUMAN	Q6PJG9	A_23_P63980	-0.445289	11.2886	-3.92218	0.00123226	0.775433	1
ENSG00000178130	-	-	-	A_32_P942508	0.448853	7.0639	3.90825	0.00126881	0.775433	1
ENSG00000100055	CYTH4	CYH4_HUMAN	Q9UIA0	A_24_P74559	0.343187	7.06773	3.90433	0.00127928	0.775433	1
ENSG00000124575	HIST1H1D	H13_HUMAN	P16402	A_24_P260639	-0.539207	12.1699	-3.8712	0.00137138	0.775433	1
ENSG00000259917	-	-	-	A_24_P42122	-0.403802	11.2956	-3.84005	0.00146409	0.775433	1
ENSG00000268083	-	-	-	A_24_P42122	-0.403802	11.2956	-3.84005	0.00146409	0.775433	1
ENSG00000104824	HNRNPL	HNRPL_HUMAN	P14866	A_24_P42122	-0.403802	11.2956	-3.84005	0.00146409	0.775433	1
ENSG00000275239	-	-	-	A_32_P137299	0.420171	6.94165	3.82636	0.00150682	0.775433	1
ENSG00000229697	-	-	-	A_32_P137299	0.420171	6.94165	3.82636	0.00150682	0.775433	1
ENSG00000129351	ILF3	ILF3_HUMAN	Q12906	A_23_P329152	-0.442638	11.8796	-3.80471	0.00157694	0.775433	1
ENSG00000223573	-	-	-	A_23_P359666	-0.414269	7.37259	-3.78467	0.0016448	0.775433	1
ENSG00000011638	TMEM159	TM159_HUMAN	Q96B96	A_23_P406131	-0.388485	10.6168	-3.77765	0.00166926	0.775433	1
ENSG00000184260	HIST2H2AC	H2A2C_HUMAN	Q16777	A_23_P301247	-0.563337	12.1856	-3.76606	0.00171044	0.775433	1
ENSG00000178096	BOLA1	BOLA1_HUMAN	Q9Y3E2	A_23_P301247	-0.563337	12.1856	-3.76606	0.00171044	0.775433	1
ENSG00000161940	BCL6B	BCL6B_HUMAN	Q8N143	A_23_P324813	0.338199	7.20607	3.75901	0.00173595	0.775433	1
ENSG00000185294	SPPL2C	SPP2C_HUMAN	Q8IUH8	A_32_P142779	-0.533662	7.03906	-3.74792	0.00177694	0.775433	1
ENSG00000160570	DEDD2	DEDD2_HUMAN	Q8WXF8	A_24_P207479	-0.403264	10.772	-3.74329	0.00179431	0.775433	1
ENSG00000179967	-	-	-	A_24_P417984	-0.35922	15.1146	-3.74214	0.00179868	0.775433	1
ENSG00000173457	PPP1R14B	PP14B_HUMAN	Q96C90	A_24_P417984	-0.35922	15.1146	-3.74214	0.00179868	0.775433	1
ENSG00000175567	UCP2	UCP2_HUMAN	P55851	A_23_P47704	-0.494364	11.7977	-3.73745	0.0018165	0.775433	1
ENSG00000148450	MSRB2	MSRB2_HUMAN	Q9Y3D2	A_23_P97932	-0.348476	12.8722	-3.73096	0.00184148	0.775433	1
ENSG00000198356	ASNA1	ASNA_HUMAN	O43681	A_23_P27627	-0.385441	11.9347	-3.70529	0.00194365	0.775433	1
ENSG00000256028	-	-	-	A_24_P184460	-0.357068	13.1169	-3.69973	0.00196652	0.775433	1
ENSG00000182196	ARL6IP4	AR6P4_HUMAN	Q66PJ3	A_24_P184460	-0.357068	13.1169	-3.69973	0.00196652	0.775433	1
ENSG00000233867	-	-	-	A_24_P657226	-0.368778	6.96991	-3.69706	0.00197759	0.775433	1
ENSG00000137720	C11orf1	CK001_HUMAN	Q9H5F2	A_24_P406939	-0.466759	6.82783	-3.69608	0.00198168	0.775433	1
ENSG00000205937	RNPS1	RNPS1_HUMAN	Q15287	A_23_P152272	-0.328087	13.2724	-3.68824	0.00201461	0.775433	1
ENSG00000105486	LIG1	DNLI1_HUMAN	P18858	A_23_P39116	-0.426873	11.9807	-3.6788	0.00205505	0.775433	1
ENSG00000170180	GPErik	GLPA_HUMAN	P02724	A_24_P12059	-0.392975	7.04437	-3.67009	0.00209305	0.775433	1
ENSG00000170180	GYPA	GLPA_HUMAN	P02724	A_24_P12059	-0.392975	7.04437	-3.67009	0.00209305	0.775433	1
ENSG00000120709	FAM53C	FA53C_HUMAN	Q9NYF3	A_24_P380234	0.385149	10.0988	3.66945	0.0020959	0.775433	1
ENSG00000215515	-	-	-	A_24_P917810	-0.384283	7.00154	-3.64453	0.00220875	0.775433	1
ENSG00000108839	ALOX12	LOX12_HUMAN	P18054	A_23_P152906	-0.423284	7.22278	-3.63568	0.00225025	0.775433	1
ENSG00000135776	ABCB10	ABCBA_HUMAN	Q9NRK6	A_24_P274073	-0.447041	8.72981	-3.63234	0.00226612	0.775433	1
ENSG00000237422	-	-	-	A_24_P817490	0.33232	6.81474	3.62262	0.00231299	0.775433	1
ENSG00000087008	ACOX3	ACOX3_HUMAN	O15254	A_24_P354451	0.361552	10.335	3.62025	0.00232456	0.775433	1
ENSG00000141349	G6PC3	G6PC3_HUMAN	Q9BUM1	A_23_P55174	-0.385186	10.0344	-3.61913	0.00233002	0.775433	1
ENSG00000157657	ZNF618	ZN618_HUMAN	Q5T7W0	A_23_P43679	-0.424935	11.2474	-3.61166	0.00236695	0.775433	1
ENSG00000272670	-	-	-	A_24_P236753	0.444571	7.07068	3.61004	0.00237505	0.775433	1
ENSG00000272636	DOC2B	-	-	A_24_P236753	0.444571	7.07068	3.61004	0.00237505	0.775433	1
ENSG00000106128	GHRHR	GHRHR_HUMAN	Q02643	A_23_P8497	-0.360372	7.03012	-3.6065	0.00239281	0.775433	1
ENSG00000106128	GHRHRpsv	GHRHR_HUMAN	Q02643	A_23_P8497	-0.360372	7.03012	-3.6065	0.00239281	0.775433	1
ENSG00000215873	-	-	-	A_24_P84898	-0.376083	10.9951	-3.58572	0.00249978	0.775433	1
ENSG00000169548	ZNF280A	Z280A_HUMAN	P59817	A_23_P154972	-0.40837	8.49948	-3.58165	0.00252131	0.775433	1
ENSG00000114796	KLHL24	KLH24_HUMAN	Q6TFL4	A_23_P251574	-0.413881	8.56067	-3.57911	0.00253485	0.775433	1
ENSG00000113578	FGF1	FGF1_HUMAN	P05230	A_24_P251969	-0.43529	7.1443	-3.57434	0.00256042	0.775433	1
ENSG00000258274	-	-	-	A_32_P66616	-0.389892	7.05093	-3.56531	0.00260953	0.775433	1
ENSG00000231141	-	-	-	A_24_P280328	0.558298	7.03744	3.56092	0.0026338	0.775433	1
ENSG00000184716	SERINC4	SERC4_HUMAN	A6NH21	A_32_P138977	0.469186	7.20534	3.54878	0.00270196	0.775433	1
ENSG00000264546	-	-	-	A_24_P848134	-0.368283	6.87502	-3.51646	0.00289216	0.775433	1
ENSG00000160584	SIK3	SIK3_HUMAN	Q9Y2K2	A_24_P329924	0.441248	9.24884	3.50636	0.0029543	0.775433	1
ENSG00000187954	CYHR1	CYHR1_HUMAN	Q6ZMK1	A_24_P89843	-0.415217	10.3247	-3.50262	0.00297762	0.775433	1
ENSG00000169059	VCX3A	VCX3_HUMAN	Q9NNX9	A_24_P230282	0.422469	7.77017	3.50202	0.00298142	0.775433	1
ENSG00000182583	VCX	VCX1_HUMAN	Q9H320	A_24_P230282	0.422469	7.77017	3.50202	0.00298142	0.775433	1
ENSG00000177504	VCX2	VCX2_HUMAN	Q9H322	A_24_P230282	0.422469	7.77017	3.50202	0.00298142	0.775433	1
ENSG00000205642	VCX3B	VCX3B_HUMAN	Q9H321	A_24_P230282	0.422469	7.77017	3.50202	0.00298142	0.775433	1
ENSG00000183648	NDUFB1	NDUB1_HUMAN	O75438	A_23_P140423	-0.37088	14.0607	-3.49998	0.00299422	0.775433	1
ENSG00000188157	AGRN	AGRIN_HUMAN	O00468	A_23_P343411	-0.425217	12.5707	-3.48937	0.00306187	0.775433	1
ENSG00000101057	MYBL2	MYBB_HUMAN	P10244	A_23_P143190	-0.376859	11.2509	-3.4884	0.00306809	0.775433	1
ENSG00000126858	RHOT1	MIRO1_HUMAN	Q8IXI2	A_23_P433204	0.446511	7.21018	3.46931	0.00319385	0.775433	1
ENSG00000168298	HIST1H1E	H14_HUMAN	P10412	A_23_P7976	-0.487371	12.5188	-3.46694	0.00320985	0.775433	1
ENSG00000148735	PLEKHS1	PKHS1_HUMAN	Q5SXH7	A_24_P286951	-0.323028	6.85926	-3.45099	0.00331943	0.775433	1
ENSG00000124588	NQO2	NQO2_HUMAN	P16083	A_23_P58953	-0.384043	11.7968	-3.44999	0.00332642	0.775433	1
ENSG00000105669	COPE	COPE_HUMAN	O14579	A_24_P399622	-0.372954	11.3736	-3.44176	0.00338451	0.775433	1
ENSG00000268193	-	-	-	A_24_P399622	-0.372954	11.3736	-3.44176	0.00338451	0.775433	1
ENSG00000104687	GSR	GSHR_HUMAN	P00390	A_23_P146084	-0.353986	10.3809	-3.43143	0.00345886	0.775433	1
ENSG00000075407	ZNF37A	ZN37A_HUMAN	P17032	A_23_P23941	-0.346343	8.15216	-3.42526	0.003504	0.775433	1
ENSG00000142609	CFAP74	-	-	A_24_P85258	-0.354984	6.96968	-3.417	0.00356547	0.775433	1
ENSG00000181652	ATG9B	ATG9B_HUMAN	Q674R7	A_32_P379379	-0.44514	7.13424	-3.41401	0.00358796	0.775433	1
ENSG00000213209	-	-	-	A_24_P204238	0.442306	7.67409	3.40403	0.00366404	0.775433	1
ENSG00000170262	MRAP	MRAP_HUMAN	Q8TCY5	A_24_P126210	-0.378974	7.01394	-3.39827	0.00370869	0.775433	1
ENSG00000116675	DNAJC6	AUXI_HUMAN	O75061	A_23_P95359	-0.306488	7.78921	-3.39641	0.00372324	0.775433	1
ENSG00000078295	ADCY2	ADCY2_HUMAN	Q08462	A_32_P405973	-0.423518	6.94821	-3.39058	0.00376917	0.775433	1
ENSG00000165084	C8orf34	CH034_HUMAN	Q49A92	A_23_P73311	0.401004	8.69128	3.39017	0.0037724	0.775433	1
ENSG00000109625	CPZ	CBPZ_HUMAN	Q66K79	A_23_P58251	-0.427724	10.6809	-3.37645	0.00388281	0.775433	1
ENSG00000155269	GPR78	GPR78_HUMAN	Q96P69	A_23_P58251	-0.427724	10.6809	-3.37645	0.00388281	0.775433	1
ENSG00000224120	C6orf136	CF136_HUMAN	Q5SQH8	A_23_P300826	-0.379527	9.3503	-3.3566	0.00404828	0.775433	1
ENSG00000237012	C6orf136	CF136_HUMAN	Q5SQH8	A_23_P300826	-0.379527	9.3503	-3.3566	0.00404828	0.775433	1
ENSG00000233641	C6orf136	CF136_HUMAN	Q5SQH8	A_23_P300826	-0.379527	9.3503	-3.3566	0.00404828	0.775433	1
ENSG00000204564	C6orf136	CF136_HUMAN	Q5SQH8	A_23_P300826	-0.379527	9.3503	-3.3566	0.00404828	0.775433	1
ENSG00000237100	C6orf136	CF136_HUMAN	Q5SQH8	A_23_P300826	-0.379527	9.3503	-3.3566	0.00404828	0.775433	1
ENSG00000233164	C6orf136	CF136_HUMAN	Q5SQH8	A_23_P300826	-0.379527	9.3503	-3.3566	0.00404828	0.775433	1
ENSG00000206487	C6orf136	CF136_HUMAN	Q5SQH8	A_23_P300826	-0.379527	9.3503	-3.3566	0.00404828	0.775433	1
ENSG00000124766	SOX4	SOX4_HUMAN	Q06945	A_23_P82169	-0.43005	14.5985	-3.35246	0.00408366	0.775433	1
ENSG00000116132	PRRX1	PRRX1_HUMAN	P54821	A_24_P552374	-0.455217	7.0668	-3.3464	0.00413594	0.775433	1
ENSG00000143612	C1orf43	CA043_HUMAN	Q9BWL3	A_24_P393461	-0.308494	11.7972	-3.34503	0.00414785	0.775433	1
ENSG00000164776	PHKG1	PHKG1_HUMAN	Q16816	A_23_P304446	-0.367691	7.07348	-3.34451	0.0041524	0.775433	1
ENSG00000204666	-	-	-	A_32_P215100	-0.393675	7.0429	-3.34134	0.00418018	0.775433	1
ENSG00000025770	NCAPH2	CNDH2_HUMAN	Q6IBW4	A_23_P80398	-0.383136	11.4391	-3.34093	0.00418378	0.775433	1
ENSG00000130175	PRKCSH	GLU2B_HUMAN	P14314	A_24_P396197	-0.337199	11.0422	-3.33957	0.00419577	0.775433	1
ENSG00000182054	IDH2	IDHP_HUMAN	P48735	A_23_P129209	-0.494046	9.684	-3.329	0.00428993	0.775433	1
ENSG00000126934	MAP2K2	MP2K2_HUMAN	P36507	A_23_P208835	-0.338755	11.9739	-3.32634	0.00431399	0.775433	1
ENSG00000132466	ANKRD17	ANR17_HUMAN	O75179	A_23_P144378	-0.380048	12.0626	-3.32321	0.00434244	0.775433	1
ENSG00000104960	PTOV1	PTOV1_HUMAN	Q86YD1	A_24_P219808	-0.375717	12.7948	-3.30174	0.00454278	0.775433	1
ENSG00000063241	ISOC2	ISOC2_HUMAN	Q96AB3	A_24_P99795	-0.327899	11.2856	-3.29833	0.00457536	0.775433	1
ENSG00000105323	HNRNPUL1	HNRL1_HUMAN	Q9BUJ2	A_24_P108351	-0.373665	10.3025	-3.29054	0.00465089	0.775433	1
ENSG00000168710	AHCYL1	SAHH2_HUMAN	O43865	A_24_P11307	-0.319436	10.0541	-3.28898	0.00466608	0.775433	1
ENSG00000173402	DAG1	DAG1_HUMAN	Q14118	A_24_P225961	-0.420773	11.7842	-3.27467	0.0048084	0.775433	1
ENSG00000164418	GRIK2	GRIK2_HUMAN	Q13002	A_32_P115796	-0.426618	6.92992	-3.27291	0.00482618	0.775433	1
ENSG00000135686	KLHL36	KLH36_HUMAN	Q8N4N3	A_23_P88802	-0.308383	9.25648	-3.27275	0.0048278	0.775433	1
ENSG00000149485	FADS1	FADS1_HUMAN	O60427	A_23_P203419	-0.469127	12.9189	-3.2661	0.00489562	0.775433	1
ENSG00000110955	ATP5B	ATPB_HUMAN	P06576	A_23_P33216	-0.385418	14.7384	-3.26113	0.00494695	0.775433	1
ENSG00000215154	-	-	-	A_23_P305616	-0.440473	7.31496	-3.26019	0.00495675	0.775433	1
ENSG00000234829	IFNA17	IFN17_HUMAN	P01571	A_23_P20704	0.453152	6.92409	3.25792	0.00498042	0.775433	1
ENSG00000186803	IFNA10	IFN10_HUMAN	P01566	A_23_P20704	0.453152	6.92409	3.25792	0.00498042	0.775433	1
ENSG00000134779	TPGS2	TPGS2_HUMAN	Q68CL5	A_24_P128140	-0.393756	11.0607	-3.25698	0.00499022	0.775433	1
ENSG00000105397	TYK2	TYK2_HUMAN	P29597	A_23_P153311	-0.330699	10.3901	-3.25503	0.00501071	0.775433	1
ENSG00000265565	-	-	-	A_23_P81859	-0.560539	13.5745	-3.24954	0.00506865	0.775433	1
ENSG00000274997	HIST1H2AH	H2A1H_HUMAN	Q96KK5	A_23_P81859	-0.560539	13.5745	-3.24954	0.00506865	0.775433	1
ENSG00000101639	CEP192	CE192_HUMAN	Q8TEP8	A_23_P89710	0.417447	10.6382	3.24666	0.00509941	0.775433	1
ENSG00000274487	-	-	-	A_24_P409346	-0.383242	9.32828	-3.244	0.0051279	0.775433	1
ENSG00000141279	NPEPPS	PSA_HUMAN	P55786	A_24_P409346	-0.383242	9.32828	-3.244	0.0051279	0.775433	1
ENSG00000274615	-	-	-	A_24_P409346	-0.383242	9.32828	-3.244	0.0051279	0.775433	1
ENSG00000261499	-	-	-	A_24_P409346	-0.383242	9.32828	-3.244	0.0051279	0.775433	1
ENSG00000170955	PRKCDBP	PRDBP_HUMAN	Q969G5	A_23_P203475	0.385573	14.6224	3.24396	0.00512833	0.775433	1
ENSG00000101365	IDH3B	IDH3B_HUMAN	O43837	A_23_P502196	-0.315253	11.2905	-3.2427	0.0051419	0.775433	1
ENSG00000153147	SMARCA5	SMCA5_HUMAN	O60264	A_23_P406591	0.395276	7.12202	3.24018	0.00516916	0.775433	1
ENSG00000236296	-	-	-	A_23_P406591	0.395276	7.12202	3.24018	0.00516916	0.775433	1
ENSG00000108187	PBLD	PBLD_HUMAN	P30039	A_24_P126484	-0.380107	6.93054	-3.23608	0.00521385	0.775433	1
ENSG00000185985	SLITRK2	-	-	A_24_P66605	-0.306455	7.32199	-3.23463	0.00522971	0.775433	1
ENSG00000180481	GLIPR1L2	GRPL2_HUMAN	Q4G1C9	A_24_P381505	0.502734	7.10701	3.23197	0.00525899	0.775433	1
ENSG00000118564	FBXL5	FBXL5_HUMAN	Q9UKA1	A_23_P213247	0.333329	10.9285	3.22469	0.00533979	0.775433	1
ENSG00000180776	ZDHHC20	ZDH20_HUMAN	Q5W0Z9	A_23_P99397	-0.444199	9.90739	-3.2206	0.00538581	0.775433	1
ENSG00000236953	-	-	-	A_23_P99397	-0.444199	9.90739	-3.2206	0.00538581	0.775433	1
ENSG00000178878	APOLD1	APLD1_HUMAN	Q96LR9	A_23_P48217	0.512345	8.84973	3.21841	0.00541058	0.775433	1
ENSG00000187003	ACTL7A	ACL7A_HUMAN	Q9Y615	A_23_P31984	0.328401	7.05219	3.21563	0.00544216	0.775433	1
ENSG00000165934	CPSF2	CPSF2_HUMAN	Q9P2I0	A_24_P82074	0.353659	7.12782	3.21079	0.00549772	0.775433	1
ENSG00000153339	TRAPPC8	TPPC8_HUMAN	Q9Y2L5	A_23_P107552	0.332171	11.1387	3.20808	0.00552892	0.775433	1
ENSG00000107201	DDX58	DDX58_HUMAN	O95786	A_23_P20814	0.406678	10.8431	3.20716	0.00553968	0.775433	1
ENSG00000278817	DGCR6	DGCR6_HUMAN	Q14129	A_23_P143569	-0.351919	11.5295	-3.20691	0.00554252	0.775433	1
ENSG00000183628	DGCR6	DGCR6_HUMAN	Q14129	A_23_P143569	-0.351919	11.5295	-3.20691	0.00554252	0.775433	1
ENSG00000128185	DGCR6L	DGC6L_HUMAN	Q9BY27	A_23_P143569	-0.351919	11.5295	-3.20691	0.00554252	0.775433	1
ENSG00000182447	OTOL1	OTOL1_HUMAN	A6NHN0	A_24_P7467	0.431795	6.83889	3.20583	0.0055551	0.775433	1
ENSG00000144711	IQSEC1	IQEC1_HUMAN	Q6DN90	A_24_P414187	-0.292248	7.28327	-3.20183	0.00560188	0.775433	1
ENSG00000165507	C10orf10	DEPP_HUMAN	Q9NTK1	A_24_P329795	0.448417	7.05729	3.2017	0.00560341	0.775433	1
ENSG00000165507	DEPP	DEPP_HUMAN	Q9NTK1	A_24_P329795	0.448417	7.05729	3.2017	0.00560341	0.775433	1
ENSG00000183723	CMTM4	CKLF4_HUMAN	Q8IZR5	A_32_P84009	-0.413236	12.4526	-3.19698	0.00565911	0.775433	1
ENSG00000257335	MGAM	MGA_HUMAN	O43451	A_23_P42897	0.311285	6.9336	3.18461	0.00580761	0.775433	1
ENSG00000234699	-	-	-	A_24_P460599	-0.316098	7.09243	-3.18359	0.00582002	0.775433	1
ENSG00000112419	PHACTR2	PHAR2_HUMAN	O75167	A_24_P726336	0.35511	10.8267	3.18181	0.00584167	0.775433	1
ENSG00000235106	-	-	-	A_32_P116058	-0.336095	12.5514	-3.18161	0.0058442	0.775433	1
ENSG00000091436	ZAK	-	-	A_23_P366394	0.362079	7.83509	3.17949	0.0058702	0.775433	1
ENSG00000158220	ESYT3	ESYT3_HUMAN	A0FGR9	A_24_P697685	0.344364	7.26759	3.17654	0.00590654	0.775433	1
ENSG00000175387	SMAD2	SMAD2_HUMAN	Q15796	A_24_P202527	0.326331	11.4183	3.17634	0.00590906	0.775433	1
ENSG00000179335	CLK3	CLK3_HUMAN	P49761	A_32_P20697	-0.393419	9.92002	-3.1719	0.00596418	0.775433	1
ENSG00000276667	-	-	-	A_32_P20697	-0.393419	9.92002	-3.1719	0.00596418	0.775433	1
ENSG00000145741	BTF3	BTF3_HUMAN	P20290	A_24_P183264	-0.348673	13.9965	-3.16903	0.00600008	0.775433	1
ENSG00000160746	ANO10	ANO10_HUMAN	Q9NW15	A_23_P6688	-0.336993	10.0134	-3.16568	0.00604235	0.775433	1
ENSG00000088930	XRN2	XRN2_HUMAN	Q9H0D6	A_23_P166135	-0.402179	10.6865	-3.15812	0.00613867	0.775433	1
ENSG00000104529	EEF1D	EF1D_HUMAN	P29692	A_23_P389708	-0.302792	14.6416	-3.15744	0.00614748	0.775433	1
ENSG00000205362	MT1A	MT1A_HUMAN	P04731	A_23_P54840	0.379352	12.217	3.15546	0.00617299	0.775433	1
ENSG00000260549	-	-	-	A_23_P54840	0.379352	12.217	3.15546	0.00617299	0.775433	1
ENSG00000205364	MT1M	MT1M_HUMAN	Q8N339	A_23_P54840	0.379352	12.217	3.15546	0.00617299	0.775433	1
ENSG00000005022	SLC25A5	ADT2_HUMAN	P05141	A_24_P182183	-0.31385	15.0052	-3.15442	0.00618646	0.775433	1
ENSG00000183598	HIST2H3A	H32_HUMAN	Q71DI3	A_24_P324465	-0.313562	14.8789	-3.15214	0.00621598	0.775433	1
ENSG00000183598	HIST2H3C	H32_HUMAN	Q71DI3	A_24_P324465	-0.313562	14.8789	-3.15214	0.00621598	0.775433	1
ENSG00000183598	HIST2H3D	H32_HUMAN	Q71DI3	A_24_P324465	-0.313562	14.8789	-3.15214	0.00621598	0.775433	1
ENSG00000213244	-	-	-	A_24_P324465	-0.313562	14.8789	-3.15214	0.00621598	0.775433	1
ENSG00000273213	-	-	-	A_24_P324465	-0.313562	14.8789	-3.15214	0.00621598	0.775433	1
ENSG00000203818	HIST2H3PS2	-	-	A_24_P324465	-0.313562	14.8789	-3.15214	0.00621598	0.775433	1
ENSG00000227603	-	-	-	A_32_P138103	-0.328778	7.23774	-3.15184	0.00621985	0.775433	1
ENSG00000144847	IGSF11	IGS11_HUMAN	Q5DX21	A_23_P132684	0.407222	7.18485	3.14891	0.00625815	0.775433	1
ENSG00000082212	ME2	MAOM_HUMAN	P23368	A_24_P348090	0.52207	11.5354	3.14826	0.00626659	0.775433	1
ENSG00000145721	LIX1	LIX1_HUMAN	Q8N485	A_32_P116606	0.346198	7.03468	3.14667	0.00628755	0.775433	1
ENSG00000118473	SGIP1	SGIP1_HUMAN	Q9BQI5	A_24_P333857	-0.276466	7.45038	-3.14492	0.00631049	0.775433	1
ENSG00000110841	PPFIBP1	LIPB1_HUMAN	Q86W92	A_23_P373724	0.343173	11.1517	3.14294	0.00633675	0.775433	1
ENSG00000233220	-	-	-	A_24_P359030	-0.326453	7.08685	-3.139	0.00638917	0.775433	1
ENSG00000223816	-	-	-	A_32_P148118	0.321213	7.20627	3.1375	0.00640922	0.775433	1
ENSG00000235235	-	-	-	A_32_P148118	0.321213	7.20627	3.1375	0.00640922	0.775433	1
ENSG00000267882	-	-	-	A_32_P314783	-0.342657	7.05058	-3.12997	0.00651093	0.775433	1
ENSG00000147439	BIN3	BIN3_HUMAN	Q9NQY0	A_23_P43086	-0.362679	10.6857	-3.12833	0.00653335	0.775433	1
ENSG00000178177	LCORL	LCORL_HUMAN	Q8N3X6	A_23_P375541	0.361683	6.95294	3.12689	0.00655301	0.775433	1
ENSG00000119912	IDE	IDE_HUMAN	P14735	A_23_P63681	0.296639	10.5414	3.12506	0.00657812	0.775433	1
ENSG00000234965	SHISA8	SHSA8_HUMAN	B8ZZ34	A_32_P53603	0.326768	9.2496	3.1234	0.006601	0.775433	1
ENSG00000136720	HS6ST1	H6ST1_HUMAN	O60243	A_24_P8220	0.281734	12.4028	3.12283	0.00660885	0.775433	1
ENSG00000171815	PCDHB1	PCDB1_HUMAN	Q9Y5F3	A_23_P110462	0.457988	6.99823	3.12044	0.00664195	0.775433	1
ENSG00000130635	COL5A1	CO5A1_HUMAN	P20908	A_23_P83818	-0.311553	8.82458	-3.11967	0.0066526	0.775433	1
ENSG00000090316	MAEA	MAEA_HUMAN	Q7L5Y9	A_24_P334445	0.377394	12.6424	3.11459	0.0067236	0.775433	1
ENSG00000168067	MAP4K2	-	-	A_24_P287075	-0.445166	9.45472	-3.11193	0.00676106	0.775433	1
ENSG00000063180	CA11	CAH11_HUMAN	O75493	A_23_P78782	-0.397315	11.4679	-3.11173	0.00676397	0.775433	1
ENSG00000116857	TMEM9	TMEM9_HUMAN	Q9P0T7	A_23_P114952	-0.290665	12.5876	-3.11088	0.00677598	0.775433	1
ENSG00000154079	SDHAF4	SDHF4_HUMAN	Q5VUM1	A_23_P256279	-0.37906	10.1638	-3.1099	0.00678983	0.775433	1
ENSG00000146112	PPP1R18	PPR18_HUMAN	Q6NYC8	A_23_P331479	-0.299922	11.1805	-3.10969	0.00679275	0.775433	1
ENSG00000132386	SERPINF1	PEDF_HUMAN	P36955	A_23_P100660	-0.383862	10.8596	-3.10841	0.00681103	0.775433	1
ENSG00000185130	HIST1H2BL	H2B1L_HUMAN	Q99880	A_23_P8013	-0.377597	13.4642	-3.09416	0.00701673	0.775433	1
ENSG00000205629	LCMT1	LCMT1_HUMAN	Q9UIC8	A_23_P112825	-0.404884	12.441	-3.09405	0.00701832	0.775433	1
ENSG00000083799	CYLD	CYLD_HUMAN	Q9NQC7	A_23_P65996	0.348339	7.346	3.09382	0.00702167	0.775433	1
ENSG00000129152	MYOD1	MYOD1_HUMAN	P15172	A_24_P30257	0.360647	8.48452	3.09098	0.00706349	0.775433	1
ENSG00000166086	JAM3	JAM3_HUMAN	Q9BX67	A_23_P217998	-0.324742	9.40007	-3.08879	0.00709587	0.775433	1
ENSG00000196865	NHLRC2	NHLC2_HUMAN	Q8NBF2	A_24_P252780	-0.334603	7.90717	-3.08827	0.00710358	0.775433	1
ENSG00000165699	TSC1	TSC1_HUMAN	Q92574	A_24_P329635	0.341935	9.83737	3.07997	0.00722768	0.775433	1
ENSG00000167207	NOD2	NOD2_HUMAN	Q9HC29	A_23_P77389	0.40347	6.9296	3.07881	0.00724522	0.775433	1
ENSG00000163875	MEAF6	EAF6_HUMAN	Q9HAF1	A_23_P103442	-0.35706	11.8762	-3.07429	0.00731382	0.775433	1
ENSG00000023191	RNH1	RINI_HUMAN	P13489	A_32_P116219	0.505727	9.7447	3.07353	0.00732538	0.775433	1
ENSG00000212128	TAS2R13	T2R13_HUMAN	Q9NYV9	A_23_P99080	-0.282233	7.01078	-3.07282	0.00733635	0.775433	1
ENSG00000160551	TAOK1	TAOK1_HUMAN	Q7L7X3	A_24_P854964	-0.40161	10.3712	-3.07123	0.0073606	0.775433	1
ENSG00000173581	CCDC106	CC106_HUMAN	Q9BWC9	A_23_P16197	-0.283117	9.08343	-3.06943	0.00738833	0.775433	1
ENSG00000160352	ZNF714	ZN714_HUMAN	Q96N38	A_23_P50825	-0.487054	9.69384	-3.06577	0.00744503	0.775433	1
ENSG00000099624	ATP5D	ATPD_HUMAN	P30049	A_23_P5089	-0.344055	12.7708	-3.0581	0.00756507	0.775433	1
ENSG00000187778	MCRS1	MCRS1_HUMAN	Q96EZ8	A_23_P48237	-0.278821	11.4947	-3.05782	0.0075694	0.775433	1
ENSG00000236383	-	-	-	A_32_P83047	-0.318395	7.13484	-3.05677	0.00758599	0.775433	1
ENSG00000267508	ZNF285	ZN285_HUMAN	Q96NJ3	A_23_P101319	-0.301216	7.76563	-3.05593	0.00759936	0.775433	1
ENSG00000072518	MARK2	MARK2_HUMAN	Q7KZI7	A_23_P161595	-0.34489	11.5002	-3.05576	0.00760208	0.775433	1
ENSG00000237378	-	-	-	A_23_P342751	0.410929	7.94558	3.05394	0.00763084	0.775433	1
ENSG00000219926	-	-	-	A_23_P342751	0.410929	7.94558	3.05394	0.00763084	0.775433	1
ENSG00000231817	-	-	-	A_23_P342751	0.410929	7.94558	3.05394	0.00763084	0.775433	1
ENSG00000254706	-	-	-	A_24_P925737	-0.284423	7.03293	-3.04901	0.0077098	0.775433	1
ENSG00000239887	C1orf226	CA226_HUMAN	A1L170	A_24_P925737	-0.284423	7.03293	-3.04901	0.0077098	0.775433	1
ENSG00000187796	CARD9	CARD9_HUMAN	Q9H257	A_24_P180830	0.449819	9.15292	3.04692	0.00774333	0.775433	1
ENSG00000213221	DNLZ	DNLZ_HUMAN	Q5SXM8	A_24_P180830	0.449819	9.15292	3.04692	0.00774333	0.775433	1
ENSG00000214335	-	-	-	A_23_P128773	0.3496	10.6492	3.0414	0.00783295	0.775433	1
ENSG00000150527	CTAGE5	CTGE5_HUMAN	O15320	A_23_P128773	0.3496	10.6492	3.0414	0.00783295	0.775433	1
ENSG00000214249	-	-	-	A_23_P128773	0.3496	10.6492	3.0414	0.00783295	0.775433	1
ENSG00000258941	CTAGE5	-	-	A_23_P128773	0.3496	10.6492	3.0414	0.00783295	0.775433	1
ENSG00000215441	-	-	-	A_23_P128773	0.3496	10.6492	3.0414	0.00783295	0.775433	1
ENSG00000242058	-	-	-	A_24_P50707	0.388972	8.19711	3.04033	0.0078504	0.775433	1
ENSG00000005022	SLC25A5	ADT2_HUMAN	P05141	A_24_P182182	-0.308167	14.6633	-3.03889	0.00787409	0.775433	1
ENSG00000235064	-	-	-	A_24_P182182	-0.308167	14.6633	-3.03889	0.00787409	0.775433	1
ENSG00000180304	OAZ2	OAZ2_HUMAN	O95190	A_23_P106463	-0.350897	12.4564	-3.03627	0.00791718	0.775433	1
ENSG00000166582	CENPV	CENPV_HUMAN	Q7Z7K6	A_23_P313828	-0.389344	10.0173	-3.03475	0.00794233	0.775433	1
ENSG00000188643	S100A16	S10AG_HUMAN	Q96FQ6	A_23_P147918	-0.401586	14.0863	-3.03334	0.00796564	0.775433	1
ENSG00000008277	ADAM22	ADA22_HUMAN	Q9P0K1	A_24_P929899	0.34406	7.01486	3.03156	0.00799518	0.775433	1
ENSG00000165233	C9orf89	BINCA_HUMAN	Q96LW7	A_23_P146367	-0.32604	12.3526	-3.03049	0.00801305	0.775433	1
ENSG00000277332	-	-	-	A_32_P76427	-0.336556	7.12314	-3.02868	0.00804333	0.775433	1
ENSG00000267673	FDX1L	ADXL_HUMAN	Q6P4F2	A_24_P416660	-0.312447	12.0927	-3.02853	0.00804589	0.775433	1
ENSG00000220201	ZGLP1	ZGLP1_HUMAN	P0C6A0	A_24_P416660	-0.312447	12.0927	-3.02853	0.00804589	0.775433	1
ENSG00000167807	-	-	-	A_24_P416660	-0.312447	12.0927	-3.02853	0.00804589	0.775433	1
ENSG00000125458	NT5C	NT5C_HUMAN	Q8TCD5	A_23_P66439	-0.30498	12.0623	-3.02738	0.00806516	0.775433	1
ENSG00000198663	C6orf89	CF089_HUMAN	Q6UWU4	A_32_P33937	0.294492	7.45353	3.02648	0.00808017	0.775433	1
ENSG00000117399	CDC20	CDC20_HUMAN	Q12834	A_23_P149200	-0.31571	11.6762	-3.02464	0.00811126	0.775433	1
ENSG00000122787	AKR1D1	AK1D1_HUMAN	P51857	A_23_P255185	-0.412439	7.01355	-3.02061	0.00817956	0.775433	1
ENSG00000076706	MCAM	MUC18_HUMAN	P43121	A_23_P162171	-0.310568	10.4754	-3.01944	0.00819961	0.775433	1
ENSG00000196678	ERI2	ERI2_HUMAN	A8K979	A_23_P129717	0.384252	7.02684	3.01591	0.00826	0.775433	1
ENSG00000197496	SLC2A10	GTR10_HUMAN	O95528	A_23_P210521	0.391231	7.06018	3.0105	0.00835352	0.775433	1
ENSG00000256315	-	-	-	A_32_P70129	0.338188	7.14681	3.01002	0.00836188	0.775433	1
ENSG00000176788	BASP1	BASP1_HUMAN	P80723	A_23_P213385	-0.36591	14.2374	-3.00626	0.00842748	0.775433	1
ENSG00000148660	CAMK2G	KCC2G_HUMAN	Q13555	A_24_P141332	0.318035	10.4155	3.00615	0.0084295	0.775433	1
ENSG00000129355	CDKN2D	CDN2D_HUMAN	P55273	A_23_P89941	-0.376206	10.5785	-3.00492	0.00845103	0.775433	1
ENSG00000147400	CETN2	CETN2_HUMAN	P41208	A_23_P73493	0.289665	11.2212	2.99988	0.00854017	0.775433	1
ENSG00000176101	SSNA1	SSNA1_HUMAN	O43805	A_24_P303915	-0.315496	11.9889	-2.99955	0.00854606	0.775433	1
ENSG00000106538	RARRES2	RARR2_HUMAN	Q99969	A_23_P134237	-0.517476	11.6	-2.99923	0.00855174	0.775433	1
ENSG00000215834	-	-	-	A_23_P148793	0.323317	7.01666	2.99898	0.00855613	0.775433	1
ENSG00000107562	CXCL12	SDF1_HUMAN	P48061	A_24_P412156	0.345863	6.98344	2.99892	0.00855714	0.775433	1
ENSG00000095970	TREM2	TREM2_HUMAN	Q9NZC2	A_24_P12397	-0.394608	7.01854	-2.99882	0.00855898	0.775433	1
ENSG00000159527	PGLYRP3	PGRP3_HUMAN	Q96LB9	A_23_P96899	0.286676	7.08286	2.99869	0.00856138	0.775433	1
ENSG00000105829	BET1	BET1_HUMAN	O15155	A_23_P59700	0.417873	9.00181	2.9981	0.00857179	0.775433	1
ENSG00000105829	DKFZp781C0425	BET1_HUMAN	O15155	A_23_P59700	0.417873	9.00181	2.9981	0.00857179	0.775433	1
ENSG00000225968	ELFN1	ELFN1_HUMAN	P0C7U0	A_24_P7873	0.418876	12.2222	2.99659	0.00859883	0.775433	1
ENSG00000203782	LOR	LORI_HUMAN	P23490	A_24_P171274	-0.324698	7.25442	-2.99586	0.00861178	0.775433	1
ENSG00000187266	EPOR	EPOR_HUMAN	P19235	A_23_P367899	-0.385759	9.45393	-2.99554	0.00861757	0.775433	1
ENSG00000235649	-	-	-	A_23_P258136	-0.378954	9.76214	-2.99446	0.00863691	0.775433	1
ENSG00000101825	MXRA5	MXRA5_HUMAN	Q9NR99	A_23_P258136	-0.378954	9.76214	-2.99446	0.00863691	0.775433	1
ENSG00000005156	LIG3	DNLI3_HUMAN	P49916	A_23_P501134	-0.361583	8.78832	-2.99131	0.00869368	0.775433	1
ENSG00000270107	-	-	-	A_32_P34703	-0.590159	7.10618	-2.99054	0.00870767	0.775433	1
ENSG00000139291	TMEM19	TMM19_HUMAN	Q96HH6	A_24_P358976	0.317238	9.20604	2.98481	0.00881194	0.775433	1
ENSG00000258064	-	-	-	A_24_P358976	0.317238	9.20604	2.98481	0.00881194	0.775433	1
ENSG00000166197	NOLC1	NOLC1_HUMAN	Q14978	A_23_P202143	-0.372307	12.3775	-2.98353	0.00883543	0.775433	1
ENSG00000116260	QSOX1	QSOX1_HUMAN	O00391	A_23_P12463	-0.316263	13.3276	-2.98208	0.00886213	0.775433	1
ENSG00000099998	GGT5	GGT5_HUMAN	P36269	A_23_P132197	0.263921	6.98232	2.98138	0.00887498	0.775433	1
ENSG00000092108	SCFD1	SCFD1_HUMAN	Q8WVM8	A_24_P844995	0.263821	10.8037	2.98138	0.00887503	0.775433	1
ENSG00000176623	RMDN1	RMD1_HUMAN	Q96DB5	A_23_P83493	0.290146	10.0262	2.98123	0.00887783	0.775433	1
ENSG00000010327	STAB1	-	-	A_24_P119456	0.368608	6.92901	2.98099	0.00888224	0.775433	1
ENSG00000204479	PRAMEF17	PRA17_HUMAN	Q5VTA0	A_24_P306304	-0.37286	6.97696	-2.97667	0.00896238	0.775433	1
ENSG00000144827	ABHD10	ABHDA_HUMAN	Q9NUJ1	A_23_P92213	-0.312045	10.3408	-2.9752	0.0089897	0.775433	1
ENSG00000224109	-	-	-	A_32_P195719	0.328005	8.0712	2.97267	0.009037	0.775433	1
ENSG00000223591	-	-	-	A_32_P195719	0.328005	8.0712	2.97267	0.009037	0.775433	1
ENSG00000214851	-	-	-	A_23_P342398	-0.392748	6.97024	-2.97256	0.00903916	0.775433	1
ENSG00000264944	-	-	-	A_24_P259490	-0.328508	12.2844	-2.96916	0.00910322	0.775433	1
ENSG00000143761	ARF1	ARF1_HUMAN	P84077	A_24_P259490	-0.328508	12.2844	-2.96916	0.00910322	0.775433	1
ENSG00000186198	SLC51B	OSTB_HUMAN	Q86UW2	A_23_P436284	0.293142	7.09088	2.96619	0.00915947	0.775433	1
ENSG00000128815	WDFY4	WDFY4_HUMAN	Q6ZS81	A_24_P410498	0.348861	6.88662	2.96579	0.00916707	0.775433	1
ENSG00000164323	CFAP97	CFA97_HUMAN	Q9P2B7	A_32_P30153	0.291404	7.32482	2.95925	0.00929239	0.775433	1
ENSG00000101003	GINS1	PSF1_HUMAN	Q14691	A_23_P210853	-0.266946	8.45641	-2.95917	0.00929396	0.775433	1
ENSG00000161653	NAGS	NAGS_HUMAN	Q8N159	A_23_P406187	-0.39405	9.16853	-2.95898	0.00929774	0.775433	1
ENSG00000254999	BRK1	BRK1_HUMAN	Q8WUW1	A_23_P420361	-0.318841	14.9462	-2.95832	0.00931043	0.775433	1
ENSG00000101210	EEF1A2	EF1A2_HUMAN	Q05639	A_23_P256033	-0.321593	9.25218	-2.95784	0.0093197	0.775433	1
ENSG00000120251	GRIA2	GRIA2_HUMAN	P42262	A_24_P914688	-0.387834	7.02045	-2.95759	0.00932458	0.775433	1
ENSG00000104228	TRIM35	TRI35_HUMAN	Q9UPQ4	A_24_P12651	0.582726	10.2201	2.95733	0.00932966	0.775433	1
ENSG00000168765	GSTM4	GSTM4_HUMAN	Q03013	A_24_P396662	-0.322428	8.68395	-2.95649	0.00934592	0.775433	1
ENSG00000241418	-	-	-	A_24_P32920	-0.346752	10.4983	-2.95586	0.00935813	0.775433	1
ENSG00000141644	MBD1	MBD1_HUMAN	Q9UIS9	A_23_P208090	0.309313	9.23915	2.95579	0.00935951	0.775433	1
ENSG00000122512	PMS2	PMS2_HUMAN	P54278	A_32_P140706	-0.355311	9.04218	-2.95542	0.00936661	0.775433	1
ENSG00000187953	-	-	-	A_32_P140706	-0.355311	9.04218	-2.95542	0.00936661	0.775433	1
ENSG00000250461	-	-	-	A_24_P158065	-0.306648	11.2159	-2.95504	0.0093741	0.775433	1
ENSG00000234545	FAM133B	F133B_HUMAN	Q5BKY9	A_24_P158065	-0.306648	11.2159	-2.95504	0.0093741	0.775433	1
ENSG00000214425	-	-	-	A_32_P5571	-0.371356	9.00803	-2.95434	0.00938768	0.775433	1
ENSG00000263142	-	-	-	A_32_P5571	-0.371356	9.00803	-2.95434	0.00938768	0.775433	1
ENSG00000277264	-	-	-	A_23_P8095	-0.407023	13.1202	-2.954	0.0093942	0.775433	1
ENSG00000253570	-	-	-	A_23_P8095	-0.407023	13.1202	-2.954	0.0093942	0.775433	1
ENSG00000204308	RNF5	RNF5_HUMAN	Q99942	A_23_P8095	-0.407023	13.1202	-2.954	0.0093942	0.775433	1
ENSG00000181378	CCDC108	CC108_HUMAN	Q6ZU64	A_23_P337278	-0.425076	6.93025	-2.95135	0.00944617	0.775433	1
ENSG00000230314	-	-	-	A_32_P82204	0.42647	7.26079	2.94534	0.00956455	0.775433	1
ENSG00000162769	FLVCR1	FLVC1_HUMAN	Q9Y5Y0	A_32_P201958	0.347941	10.2919	2.94334	0.00960431	0.775433	1
ENSG00000080947	-	-	-	A_32_P384562	-0.374218	7.39379	-2.94264	0.0096184	0.775433	1
ENSG00000187800	PEAR1	PEAR1_HUMAN	Q5VY43	A_24_P943301	-0.344646	7.22079	-2.94234	0.00962444	0.775433	1
ENSG00000223414	-	-	-	A_32_P8546	-0.33312	6.95504	-2.94223	0.00962659	0.775433	1
ENSG00000142156	COL6A1	CO6A1_HUMAN	P12109	A_32_P32254	-0.285908	15.2395	-2.94208	0.00962962	0.775433	1
ENSG00000100297	MCM5	MCM5_HUMAN	P33992	A_23_P132277	-0.298191	12.7101	-2.93796	0.00971215	0.775433	1
ENSG00000163528	CHCHD4	MIA40_HUMAN	Q8N4Q1	A_23_P428849	-0.335786	11.8466	-2.93646	0.00974242	0.775433	1
ENSG00000135476	ESPL1	ESPL1_HUMAN	Q14674	A_23_P32707	-0.394561	11.226	-2.93284	0.00981583	0.775433	1
ENSG00000237435	-	-	-	A_32_P99183	0.384817	6.81238	2.93164	0.00984036	0.775433	1
ENSG00000279515	FLJ20019	-	-	A_23_P33558	-0.337244	7.12252	-2.93138	0.00984557	0.775433	1
ENSG00000162775	RBM15	RBM15_HUMAN	Q96T37	A_23_P34877	-0.27306	8.10043	-2.93005	0.00987282	0.775433	1
ENSG00000006042	TMEM98	TMM98_HUMAN	Q9Y2Y6	A_23_P27040	-0.353597	12.8771	-2.92644	0.00994699	0.775433	1
ENSG00000046651	OFD1	OFD1_HUMAN	O75665	A_24_P134653	0.317366	10.139	2.9247	0.00998291	0.775433	1
ENSG00000260807	-	-	-	A_24_P367812	0.446947	11.0591	2.92463	0.00998424	0.775433	1
ENSG00000111266	DUSP16	DUS16_HUMAN	Q9BY84	A_23_P308924	-0.28375	10.4855	-2.92441	0.00998886	0.775433	1
ENSG00000165801	ARHGEF40	ARH40_HUMAN	Q8TER5	A_23_P99661	-0.396988	12.6309	-2.92439	0.00998933	0.775433	1
ENSG00000161270	NPHS1	NPHN_HUMAN	O60500	A_23_P5200	-0.285024	7.1989	-2.92373	0.0100029	0.775433	1
ENSG00000175728	C11orf44	CK044_HUMAN	Q8N8P7	A_23_P316571	0.356868	6.91951	2.923	0.0100181	0.775433	1
ENSG00000221923	ZNF880	ZN880_HUMAN	Q6PDB4	A_24_P926783	0.293429	8.12647	2.92272	0.010024	0.775433	1
ENSG00000114054	PCCB	PCCB_HUMAN	P05166	A_24_P302797	-0.318241	11.1573	-2.92169	0.0100454	0.775433	1
ENSG00000136881	BAAT	BAAT_HUMAN	Q14032	A_23_P71810	-0.327289	7.0484	-2.91896	0.0101022	0.775433	1
ENSG00000110651	CD81	CD81_HUMAN	P60033	A_23_P13425	-0.273551	14.8309	-2.91485	0.0101886	0.775433	1
ENSG00000253833	-	-	-	A_32_P64928	0.427263	9.9164	2.9145	0.0101961	0.775433	1
ENSG00000146039	SLC17A4	S17A4_HUMAN	Q9Y2C5	A_23_P357270	-0.2893	7.48728	-2.91361	0.0102149	0.775433	1
ENSG00000049245	VAMP3	VAMP3_HUMAN	Q15836	A_23_P97532	-0.343977	9.82601	-2.91316	0.0102245	0.775433	1
ENSG00000262660	SLC25A10	-	-	A_23_P170352	-0.303307	12.5541	-2.91282	0.0102316	0.775433	1
ENSG00000262814	MRPL12	RM12_HUMAN	P52815	A_23_P170352	-0.303307	12.5541	-2.91282	0.0102316	0.775433	1
ENSG00000258856	-	-	-	A_24_P455060	0.279384	9.66495	2.91206	0.0102477	0.775433	1
ENSG00000196459	TRAPPC2	TPC2A_HUMAN	P0DI81	A_23_P73660	0.27861	9.01123	2.91078	0.0102749	0.775433	1
ENSG00000114745	GORASP1	GORS1_HUMAN	Q9BQQ3	A_23_P427114	-0.307688	7.47115	-2.90879	0.0103174	0.775433	1
ENSG00000170089	-	-	-	A_32_P41405	-0.29027	12.6903	-2.90741	0.0103469	0.775433	1
ENSG00000051596	THOC3	THOC3_HUMAN	Q96J01	A_32_P41405	-0.29027	12.6903	-2.90741	0.0103469	0.775433	1
ENSG00000136485	DCAF7	DCAF7_HUMAN	P61962	A_23_P422268	-0.315231	10.9562	-2.90724	0.0103504	0.775433	1
ENSG00000125447	GGA3	GGA3_HUMAN	Q9NZ52	A_23_P38181	0.297086	10.5279	2.90156	0.0104728	0.775433	1
ENSG00000198788	MUC2	MUC2_HUMAN	Q02817	A_24_P84657	0.321112	6.94708	2.90098	0.0104856	0.775433	1
ENSG00000198252	STYX	STYX_HUMAN	Q8WUJ0	A_23_P117540	-0.371313	10.5447	-2.90085	0.0104882	0.775433	1
ENSG00000106392	C1GALT1	C1GLT_HUMAN	Q9NS00	A_24_P911259	0.313707	8.49715	2.90083	0.0104887	0.775433	1
ENSG00000144407	PTH2R	PTH2R_HUMAN	P49190	A_24_P457628	-0.285609	6.93383	-2.9003	0.0105003	0.775433	1
ENSG00000143994	ABHD1	ABHD1_HUMAN	Q96SE0	A_24_P918739	0.338788	7.09534	2.89756	0.01056	0.775433	1
ENSG00000120334	CENPL	CENPL_HUMAN	Q8N0S6	A_24_P930100	-0.33938	7.05447	-2.89533	0.0106089	0.775433	1
ENSG00000157557	ETS2	ETS2_HUMAN	P15036	A_24_P382661	-0.358323	10.2709	-2.89445	0.0106282	0.775433	1
ENSG00000077782	FGFR1	FGFR1_HUMAN	P11362	A_23_P372923	-0.416007	8.8201	-2.89373	0.0106439	0.775433	1
ENSG00000101680	LAMA1	LAMA1_HUMAN	P25391	A_32_P199126	-0.39942	8.63676	-2.8937	0.0106446	0.775433	1
ENSG00000155329	ZCCHC10	ZCH10_HUMAN	Q8TBK6	A_23_P7577	0.301589	10.4233	2.88977	0.0107315	0.775433	1
ENSG00000111676	ATN1	ATN1_HUMAN	P54259	A_24_P24244	0.358155	10.2946	2.88845	0.0107608	0.775433	1
ENSG00000239829	-	-	-	A_24_P928949	0.483226	6.91004	2.88832	0.0107637	0.775433	1
ENSG00000125870	SNRPB2	RU2B_HUMAN	P08579	A_23_P40307	0.276728	11.4495	2.88829	0.0107644	0.775433	1
ENSG00000204592	HLA-E	-	-	A_24_P326082	-0.328633	11.7704	-2.88745	0.0107833	0.775433	1
ENSG00000184560	C17orf74	CQ074_HUMAN	Q0P670	A_32_P524614	0.281177	7.64639	2.88222	0.0109004	0.775433	1
ENSG00000008382	MPND	MPND_HUMAN	Q8N594	A_24_P44931	-0.268058	10.7047	-2.87815	0.0109925	0.775433	1
ENSG00000225473	-	-	-	A_24_P551758	-0.306323	7.07004	-2.87625	0.0110357	0.775433	1
ENSG00000134046	MBD2	MBD2_HUMAN	Q9UBB5	A_24_P119201	0.259127	12.4848	2.87349	0.0110988	0.775433	1
ENSG00000264522	OTUD7B	OTU7B_HUMAN	Q6GQQ9	A_23_P126766	0.322707	7.26779	2.86646	0.0112613	0.775433	1
ENSG00000014914	MTMR11	MTMRB_HUMAN	A4FU01	A_23_P126766	0.322707	7.26779	2.86646	0.0112613	0.775433	1
ENSG00000224806	-	-	-	A_24_P384196	0.252744	9.05262	2.86428	0.0113122	0.775433	1
ENSG00000183580	FBXL7	FBXL7_HUMAN	Q9UJT9	A_24_P7600	-0.355739	7.51371	-2.86418	0.0113144	0.775433	1
ENSG00000089472	HEPH	HEPH_HUMAN	Q9BQS7	A_24_P399980	-0.390358	10.0235	-2.86238	0.0113566	0.775433	1
ENSG00000162517	PEF1	PEF1_HUMAN	Q9UBV8	A_23_P313	-0.2765	11.1713	-2.86043	0.0114023	0.775433	1
ENSG00000155229	MMS19	MMS19_HUMAN	Q96T76	A_23_P46982	0.25428	11.7341	2.86023	0.0114072	0.775433	1
ENSG00000106686	SPATA6L	SPA6L_HUMAN	Q8N4H0	A_23_P157766	-0.307369	7.17211	-2.85982	0.0114167	0.775433	1
ENSG00000055211	GINM1	GINM1_HUMAN	Q9NU53	A_23_P31109	-0.273806	11.6295	-2.85891	0.0114382	0.775433	1
ENSG00000147874	HAUS6	HAUS6_HUMAN	Q7Z4H7	A_24_P941148	-0.343533	10.9973	-2.8579	0.0114622	0.775433	1
ENSG00000173825	TIGD3	TIGD3_HUMAN	Q6B0B8	A_23_P415663	-0.33799	7.49972	-2.8575	0.0114717	0.775433	1
ENSG00000257770	GPX5	GPX5_HUMAN	O75715	A_23_P214544	0.285285	7.36029	2.85602	0.0115068	0.775433	1
ENSG00000224586	GPX5	GPX5_HUMAN	O75715	A_23_P214544	0.285285	7.36029	2.85602	0.0115068	0.775433	1
ENSG00000121964	GTDC1	GTDC1_HUMAN	Q4AE62	A_23_P153945	0.320515	8.95367	2.85591	0.0115092	0.775433	1
ENSG00000165643	SOHLH1	SOLH1_HUMAN	Q5JUK2	A_24_P307964	0.317678	7.02273	2.85359	0.0115647	0.775433	1
ENSG00000113441	LNPEP	LCAP_HUMAN	Q9UIQ6	A_24_P237559	-0.294242	7.19065	-2.85348	0.0115671	0.775433	1
ENSG00000004059	ARF5	ARF5_HUMAN	P84085	A_24_P394702	-0.3593	12.8601	-2.85313	0.0115757	0.775433	1
ENSG00000163638	ADAMTS9	ATS9_HUMAN	Q9P2N4	A_23_P33356	0.34718	7.18061	2.85059	0.0116363	0.775433	1
ENSG00000064666	CNN2	CNN2_HUMAN	Q99439	A_24_P142743	-0.359524	14.184	-2.84765	0.0117072	0.775433	1
ENSG00000169490	TM2D2	TM2D2_HUMAN	Q9BX73	A_23_P502678	0.272747	11.9194	2.8449	0.0117738	0.775433	1
ENSG00000127989	MTERF1	MTEF1_HUMAN	Q99551	A_23_P408108	0.249674	8.35649	2.84261	0.0118297	0.775433	1
ENSG00000167874	TMEM88	TMM88_HUMAN	Q6PEY1	A_23_P77859	-0.423796	12.1825	-2.84089	0.0118716	0.775433	1
ENSG00000132510	KDM6B	KDM6B_HUMAN	O15054	A_23_P77859	-0.423796	12.1825	-2.84089	0.0118716	0.775433	1
ENSG00000178803	ADORA2A-AS1	AAS1_HUMAN	P86434	A_32_P18931	0.35483	6.90763	2.84069	0.0118765	0.775433	1
ENSG00000204961	PCDHA9	PCDA9_HUMAN	Q9Y5H5	A_23_P323102	0.299044	7.30835	2.83894	0.0119194	0.775433	1
ENSG00000272168	-	-	-	A_24_P861099	0.374454	8.8724	2.83742	0.0119569	0.775433	1
ENSG00000232174	-	-	-	A_24_P383940	0.256084	13.5476	2.83737	0.0119582	0.775433	1
ENSG00000198443	KRTAP4-1	KRA41_HUMAN	Q9BYQ7	A_24_P194434	0.427842	10.7061	2.83718	0.0119629	0.775433	1
ENSG00000196787	HIST1H2AG	H2A1_HUMAN	P0C0S8	A_24_P303354	-0.386909	13.4432	-2.83627	0.0119853	0.775433	1
ENSG00000196787	HIST1H2AI	H2A1_HUMAN	P0C0S8	A_24_P303354	-0.386909	13.4432	-2.83627	0.0119853	0.775433	1
ENSG00000196787	HIST1H2AK	H2A1_HUMAN	P0C0S8	A_24_P303354	-0.386909	13.4432	-2.83627	0.0119853	0.775433	1
ENSG00000196787	HIST1H2AL	H2A1_HUMAN	P0C0S8	A_24_P303354	-0.386909	13.4432	-2.83627	0.0119853	0.775433	1
ENSG00000196787	HIST1H2AM	H2A1_HUMAN	P0C0S8	A_24_P303354	-0.386909	13.4432	-2.83627	0.0119853	0.775433	1
ENSG00000038274	MAT2B	MAT2B_HUMAN	Q9NZL9	A_24_P243347	-0.394024	11.7791	-2.83478	0.0120221	0.775433	1
ENSG00000162913	C1orf145	CA145_HUMAN	Q96MR7	A_24_P93664	-0.304328	6.95055	-2.83454	0.0120282	0.775433	1
ENSG00000180660	MAB21L1	MB211_HUMAN	Q13394	A_23_P53884	0.529555	7.02108	2.83413	0.0120384	0.775433	1
ENSG00000176444	CLK2	CLK2_HUMAN	P49760	A_32_P79610	-0.297585	9.82589	-2.83159	0.0121016	0.775433	1
ENSG00000232553	-	-	-	A_32_P79610	-0.297585	9.82589	-2.83159	0.0121016	0.775433	1
ENSG00000261893	CLK2	CLK2_HUMAN	P49760	A_32_P79610	-0.297585	9.82589	-2.83159	0.0121016	0.775433	1
ENSG00000183023	SLC8A1	NAC1_HUMAN	P32418	A_24_P136866	-0.295173	7.54373	-2.8312	0.0121113	0.775433	1
ENSG00000275993	-	-	-	A_23_P132115	0.329023	7.24452	2.83053	0.0121279	0.775433	1
ENSG00000142178	SIK1	SIK1_HUMAN	P57059	A_23_P132115	0.329023	7.24452	2.83053	0.0121279	0.775433	1
ENSG00000253513	-	-	-	A_24_P934376	-0.394304	6.95157	-2.82906	0.0121648	0.775433	1
ENSG00000162999	DUSP19	DUS19_HUMAN	Q8WTR2	A_24_P911860	0.377904	7.10678	2.82824	0.0121854	0.775433	1
ENSG00000152219	ARL14EP	AL14E_HUMAN	Q8N8R7	A_23_P345778	0.274821	7.51209	2.82605	0.0122404	0.775433	1
ENSG00000174175	SELP	LYAM3_HUMAN	P16109	A_23_P137697	0.309238	6.95347	2.82586	0.0122453	0.775433	1
ENSG00000196465	MYL6B	MYL6B_HUMAN	P14649	A_23_P2223	-0.310829	14.6075	-2.82576	0.0122477	0.775433	1
ENSG00000139549	DHH	DHH_HUMAN	O43323	A_23_P162314	0.308532	8.25675	2.82491	0.0122692	0.775433	1
ENSG00000125995	ROMO1	ROMO1_HUMAN	P60602	A_23_P143414	-0.342328	14.6994	-2.82389	0.0122952	0.775433	1
ENSG00000185842	DNAH14	DYH14_HUMAN	Q0VDD8	A_24_P917290	0.341879	6.89148	2.82315	0.0123138	0.775433	1
ENSG00000110328	GALNT18	GLT18_HUMAN	Q6P9A2	A_23_P139418	-0.449031	8.65628	-2.82181	0.0123478	0.775433	1
ENSG00000189339	SLC35E2B	S352B_HUMAN	P0CK96	A_24_P942211	-0.366941	11.5088	-2.821	0.0123686	0.775433	1
ENSG00000196557	CACNA1H	CAC1H_HUMAN	O95180	A_23_P3483	-0.394707	10.3398	-2.81863	0.0124291	0.775433	1
ENSG00000260583	-	-	-	A_32_P149060	-0.316004	7.27627	-2.81605	0.0124952	0.775433	1
ENSG00000227051	C14orf132	CN132_HUMAN	Q9NPU4	A_23_P151529	-0.447586	9.35589	-2.81595	0.0124979	0.775433	1
ENSG00000125895	TMEM74B	TM74B_HUMAN	Q9NUR3	A_23_P120504	-0.251207	7.91198	-2.81496	0.0125234	0.775433	1
ENSG00000186716	BCR	BCR_HUMAN	P11274	A_23_P503115	-0.304536	12.232	-2.81297	0.0125747	0.775433	1
ENSG00000186716	BCR/ABL fusion	BCR_HUMAN	P11274	A_23_P503115	-0.304536	12.232	-2.81297	0.0125747	0.775433	1
ENSG00000168348	INSM2	INSM2_HUMAN	Q96T92	A_23_P48530	-0.28833	7.00534	-2.81119	0.012621	0.775433	1
ENSG00000093217	XYLB	XYLB_HUMAN	O75191	A_23_P121340	-0.330616	7.07949	-2.80992	0.012654	0.775433	1
ENSG00000162620	LRRIQ3	LRIQ3_HUMAN	A6PVS8	A_23_P331072	-0.365477	7.18357	-2.80797	0.012705	0.775433	1
ENSG00000172748	ZNF596	ZN596_HUMAN	Q8TC21	A_23_P82762	0.395345	7.34786	2.80656	0.0127418	0.775433	1
ENSG00000225031	-	-	-	A_32_P34186	-0.363527	12.3242	-2.80333	0.0128269	0.775433	1
ENSG00000063046	EIF4B	IF4B_HUMAN	P23588	A_32_P34186	-0.363527	12.3242	-2.80333	0.0128269	0.775433	1
ENSG00000176723	ZNF843	ZN843_HUMAN	Q8N446	A_24_P161144	0.248352	7.92346	2.80245	0.01285	0.775433	1
ENSG00000258610	-	-	-	A_23_P77000	0.377534	10.6919	2.80235	0.0128526	0.775433	1
ENSG00000071246	VASH1	VASH1_HUMAN	Q7L8A9	A_23_P77000	0.377534	10.6919	2.80235	0.0128526	0.775433	1
ENSG00000137200	CMTR1	CMTR1_HUMAN	Q8N1G2	A_23_P374149	-0.324264	9.79907	-2.80126	0.0128815	0.775433	1
ENSG00000137200	FTSJD2	CMTR1_HUMAN	Q8N1G2	A_23_P374149	-0.324264	9.79907	-2.80126	0.0128815	0.775433	1
ENSG00000105339	DENND3	DEND3_HUMAN	A2RUS2	A_24_P195120	0.361145	7.02543	2.80071	0.0128961	0.775433	1
ENSG00000276345	-	-	-	A_23_P105044	-0.304214	12.885	-2.7989	0.0129442	0.775433	1
ENSG00000214026	MRPL23	RM23_HUMAN	Q16540	A_23_P105044	-0.304214	12.885	-2.7989	0.0129442	0.775433	1
ENSG00000232797	-	-	-	A_32_P22883	-0.352084	11.7454	-2.79856	0.0129533	0.775433	1
ENSG00000160256	FAM207A	F207A_HUMAN	Q9NSI2	A_32_P22883	-0.352084	11.7454	-2.79856	0.0129533	0.775433	1
ENSG00000228797	-	-	-	A_32_P22883	-0.352084	11.7454	-2.79856	0.0129533	0.775433	1
ENSG00000165526	RPUSD4	RUSD4_HUMAN	Q96CM3	A_23_P75540	-0.323125	11.4505	-2.79826	0.0129612	0.775433	1
ENSG00000060749	QSER1	QSER1_HUMAN	Q2KHR3	A_23_P139059	-0.281468	8.27757	-2.79808	0.0129661	0.775433	1
ENSG00000140853	NLRC5	NLRC5_HUMAN	Q86WI3	A_23_P402892	-0.281118	7.13256	-2.79753	0.0129807	0.775433	1
ENSG00000006744	ELAC2	RNZ2_HUMAN	Q9BQ52	A_23_P38262	-0.369148	13.4238	-2.79691	0.0129973	0.775433	1
ENSG00000105677	TMEM147	TM147_HUMAN	Q9BVK8	A_23_P79043	-0.318016	13.2742	-2.7962	0.0130164	0.775433	1
ENSG00000086065	CHMP5	CHMP5_HUMAN	Q9NZZ3	A_24_P186862	0.32381	9.00807	2.79564	0.0130312	0.775433	1
ENSG00000227417	-	-	-	A_24_P186862	0.32381	9.00807	2.79564	0.0130312	0.775433	1
ENSG00000267185	-	-	-	A_24_P764595	0.328965	13.54	2.79483	0.0130531	0.775433	1
ENSG00000128191	DGCR8	DGCR8_HUMAN	Q8WYQ5	A_23_P211355	-0.317129	10.0186	-2.79372	0.0130828	0.775433	1
ENSG00000174792	C4orf26	CD026_HUMAN	Q17RF5	A_23_P386268	0.275938	7.09252	2.79287	0.0131058	0.775433	1
ENSG00000162736	NCSTN	NICA_HUMAN	Q92542	A_23_P34402	-0.259036	13.688	-2.79175	0.0131361	0.775433	1
ENSG00000181690	PLAG1	PLAG1_HUMAN	Q6DJT9	A_23_P411723	-0.356794	10.6534	-2.7903	0.0131752	0.775433	1
ENSG00000178776	C5orf46	CE046_HUMAN	Q6UWT4	A_23_P19176	0.28574	7.38222	2.78891	0.0132129	0.775433	1
ENSG00000175262	C1orf127	CA127_HUMAN	Q8N9H9	A_32_P468341	-0.337164	7.13124	-2.78644	0.0132802	0.775433	1
ENSG00000228409	-	-	-	A_32_P110156	0.264376	12.8248	2.78583	0.0132968	0.775433	1
ENSG00000178467	P4HTM	P4HTM_HUMAN	Q9NXG6	A_23_P113311	-0.446894	10.5717	-2.78533	0.0133104	0.775433	1
ENSG00000178252	WDR6	WDR6_HUMAN	Q9NNW5	A_23_P113311	-0.446894	10.5717	-2.78533	0.0133104	0.775433	1
ENSG00000167992	VWCE	VWCE_HUMAN	Q96DN2	A_23_P52986	-0.491039	12.3638	-2.78215	0.0133978	0.775433	1
ENSG00000248699	-	-	-	A_24_P264413	0.381542	8.77823	2.78151	0.0134154	0.775433	1
ENSG00000223773	-	-	-	A_24_P68222	-0.293993	9.03932	-2.78138	0.0134191	0.775433	1
ENSG00000258655	-	-	-	A_23_P25746	0.414095	9.67484	2.77917	0.0134802	0.775433	1
ENSG00000198685	LINC01565	GR6_HUMAN	O15544	A_23_P166969	0.373439	7.17206	2.77879	0.0134905	0.775433	1
ENSG00000234115	-	-	-	A_24_P246591	0.295929	11.9828	2.77811	0.0135095	0.775433	1
ENSG00000145604	SKP2	SKP2_HUMAN	Q13309	A_23_P156310	-0.405795	10.555	-2.77645	0.0135556	0.775433	1
ENSG00000118418	HMGN3	HMGN3_HUMAN	Q15651	A_24_P132099	-0.264892	13.0096	-2.77632	0.0135591	0.775433	1
ENSG00000071909	MYO3B	MYO3B_HUMAN	Q8WXR4	A_24_P182696	0.354164	7.0457	2.77158	0.0136919	0.775433	1
ENSG00000183655	KLHL25	KLH25_HUMAN	Q9H0H3	A_23_P65797	-0.409873	11.8522	-2.77128	0.0137004	0.775433	1
ENSG00000072501	SMC1A	SMC1A_HUMAN	Q14683	A_24_P942604	-0.304925	10.2497	-2.77083	0.013713	0.775433	1
ENSG00000171956	FOXB1	FOXB1_HUMAN	Q99853	A_23_P140527	0.338076	8.71326	2.76951	0.0137501	0.775433	1
ENSG00000148219	ASTN2	ASTN2_HUMAN	O75129	A_24_P83738	0.361994	10.2257	2.76887	0.0137683	0.775433	1
ENSG00000083828	ZNF586	ZN586_HUMAN	Q9NXT0	A_24_P83944	0.28761	7.99536	2.76735	0.0138113	0.775433	1
ENSG00000204310	AGPAT1	PLCA_HUMAN	Q99943	A_23_P258093	-0.353423	12.7946	-2.76624	0.0138426	0.775433	1
ENSG00000071054	MAP4K4	-	-	A_23_P102192	-0.340845	10.101	-2.76399	0.0139067	0.775433	1
ENSG00000112964	GHR	GHR_HUMAN	P10912	A_23_P156087	-0.270323	7.20343	-2.76336	0.0139248	0.775433	1
ENSG00000126012	KDM5C	KDM5C_HUMAN	P41229	A_23_P62270	-0.348571	10.531	-2.76196	0.0139649	0.775433	1
ENSG00000145349	CAMK2D	KCC2D_HUMAN	Q13557	A_23_P144458	-0.391646	10.5273	-2.76013	0.0140174	0.775433	1
ENSG00000196976	LAGE3	LAGE3_HUMAN	Q14657	A_23_P73763	-0.310873	13.8913	-2.75953	0.0140348	0.775433	1
ENSG00000134376	CRB1	CRUM1_HUMAN	P82279	A_24_P196528	0.338341	6.99803	2.75915	0.0140455	0.775433	1
ENSG00000168461	RAB31	RAB31_HUMAN	Q13636	A_24_P236799	-0.418215	11.218	-2.75842	0.0140667	0.775433	1
ENSG00000144460	NYAP2	NYAP2_HUMAN	Q9P242	A_24_P49427	-0.341366	6.86044	-2.75676	0.0141147	0.775433	1
ENSG00000100410	PHF5A	PHF5A_HUMAN	Q7RTV0	A_23_P253571	0.293649	10.0522	2.75656	0.0141204	0.775433	1
ENSG00000096433	ITPR3	ITPR3_HUMAN	Q14573	A_23_P19517	-0.404507	10.4473	-2.75325	0.0142168	0.775433	1
ENSG00000135446	CDK4	CDK4_HUMAN	P11802	A_23_P24997	-0.424133	13.5005	-2.75312	0.0142206	0.775433	1
ENSG00000151553	FAM160B1	F16B1_HUMAN	Q5W0V3	A_24_P325107	-0.28763	8.27375	-2.75182	0.0142585	0.775433	1
ENSG00000109323	MANBA	MANBA_HUMAN	O00462	A_23_P258698	-0.374352	9.50951	-2.75102	0.0142818	0.775433	1
ENSG00000108001	EBF3	COE3_HUMAN	Q9H4W6	A_32_P160127	0.316156	7.54295	2.75034	0.0143018	0.775433	1
ENSG00000186665	C17orf58	CQ058_HUMAN	Q2M2W7	A_24_P49190	0.290724	9.70914	2.75029	0.0143031	0.775433	1
ENSG00000279158	VCY	VCY1_HUMAN	O14598	A_23_P11390	0.340528	9.12833	2.74934	0.014331	0.775433	1
ENSG00000279158	VCY1B	VCY1_HUMAN	O14598	A_23_P11390	0.340528	9.12833	2.74934	0.014331	0.775433	1
ENSG00000279451	VCY	VCY1_HUMAN	O14598	A_23_P11390	0.340528	9.12833	2.74934	0.014331	0.775433	1
ENSG00000279451	VCY1B	VCY1_HUMAN	O14598	A_23_P11390	0.340528	9.12833	2.74934	0.014331	0.775433	1
ENSG00000129864	VCY	VCY1_HUMAN	O14598	A_23_P11390	0.340528	9.12833	2.74934	0.014331	0.775433	1
ENSG00000129864	VCY1B	VCY1_HUMAN	O14598	A_23_P11390	0.340528	9.12833	2.74934	0.014331	0.775433	1
ENSG00000129862	VCY	VCY1_HUMAN	O14598	A_23_P11390	0.340528	9.12833	2.74934	0.014331	0.775433	1
ENSG00000129862	VCY1B	VCY1_HUMAN	O14598	A_23_P11390	0.340528	9.12833	2.74934	0.014331	0.775433	1
ENSG00000137103	TMEM8B	TMM8B_HUMAN	A6NDV4	A_24_P317827	-0.270028	9.05098	-2.74812	0.0143669	0.775433	1
ENSG00000245848	CEBPA	CEBPA_HUMAN	P49715	A_24_P216165	0.400852	12.4506	2.74809	0.014368	0.775433	1
ENSG00000258529	ALG9	-	-	A_23_P64193	-0.329784	10.2892	-2.74771	0.014379	0.775433	1
ENSG00000086848	ALG9	ALG9_HUMAN	Q9H6U8	A_23_P64193	-0.329784	10.2892	-2.74771	0.014379	0.775433	1
ENSG00000177301	KCNA2	KCNA2_HUMAN	P16389	A_32_P40596	0.276558	6.9031	2.74672	0.0144082	0.775433	1
ENSG00000143771	CNIH4	CNIH4_HUMAN	Q9P003	A_23_P200507	-0.299212	13.7697	-2.74583	0.0144346	0.775433	1
ENSG00000074695	LMAN1	LMAN1_HUMAN	P49257	A_23_P78342	0.277055	9.51863	2.74504	0.0144579	0.775433	1
ENSG00000143457	GOLPH3L	GLP3L_HUMAN	Q9H4A5	A_24_P345377	-0.360114	10.8907	-2.74428	0.0144807	0.775433	1
ENSG00000214822	-	-	-	A_24_P392991	-0.29318	7.05754	-2.7442	0.014483	0.775433	1
ENSG00000214856	-	-	-	A_24_P392991	-0.29318	7.05754	-2.7442	0.014483	0.775433	1
ENSG00000048544	MRPS10	RT10_HUMAN	P82664	A_24_P283294	0.258634	9.51148	2.744	0.0144888	0.775433	1
ENSG00000232454	-	-	-	A_24_P283294	0.258634	9.51148	2.744	0.0144888	0.775433	1
ENSG00000159307	SCUBE1	SCUB1_HUMAN	Q8IWY4	A_24_P256083	0.415879	7.6061	2.74333	0.0145086	0.775433	1
ENSG00000279730	-	-	-	A_24_P238855	-0.286379	8.19112	-2.7424	0.0145363	0.775433	1
ENSG00000183955	SETD8	SETD8_HUMAN	Q9NQR1	A_24_P238855	-0.286379	8.19112	-2.7424	0.0145363	0.775433	1
ENSG00000232531	-	-	-	A_24_P238855	-0.286379	8.19112	-2.7424	0.0145363	0.775433	1
ENSG00000167700	MFSD3	MFSD3_HUMAN	Q96ES6	A_23_P406350	-0.313702	10.6374	-2.74127	0.0145702	0.775433	1
ENSG00000182518	FAM104B	F104B_HUMAN	Q5XKR9	A_32_P194025	-0.282187	11.8455	-2.74119	0.0145724	0.775433	1
ENSG00000147065	MSN	MOES_HUMAN	P26038	A_24_P453819	-0.328636	6.94184	-2.74104	0.0145771	0.775433	1
ENSG00000212722	KRTAP4-9	KRA49_HUMAN	Q9BYQ8	A_24_P315975	-0.285936	6.98266	-2.74048	0.0145937	0.775433	1
ENSG00000140525	FANCI	FANCI_HUMAN	Q9NVI1	A_32_P95729	-0.326907	11.7154	-2.74008	0.0146056	0.775433	1
ENSG00000125533	BHLHE23	BHE23_HUMAN	Q8NDY6	A_24_P57898	0.401797	12.2543	2.73651	0.0147128	0.775433	1
ENSG00000125398	SOX9	SOX9_HUMAN	P48436	A_23_P26847	-0.278025	7.0713	-2.73512	0.0147548	0.775433	1
ENSG00000211611	-	-	-	A_32_P76137	0.473091	6.98591	2.73458	0.0147712	0.775433	1
ENSG00000225523	IGKV6D-21	-	-	A_32_P76137	0.473091	6.98591	2.73458	0.0147712	0.775433	1
ENSG00000170516	COX7B2	CX7B2_HUMAN	Q8TF08	A_23_P136246	0.399636	6.9674	2.73441	0.0147763	0.775433	1
ENSG00000259592	-	-	-	A_24_P58477	-0.262126	13.6036	-2.73261	0.0148309	0.775433	1
ENSG00000100416	TRMU	MTU1_HUMAN	O75648	A_24_P916195	-0.31432	9.7217	-2.73253	0.0148334	0.775433	1
ENSG00000180758	GPR157	GP157_HUMAN	Q5UAW9	A_24_P757255	-0.247208	7.29155	-2.73139	0.014868	0.775433	1
ENSG00000122557	HERPUD2	HERP2_HUMAN	Q9BSE4	A_23_P168490	-0.25379	8.5932	-2.7304	0.0148982	0.775433	1
ENSG00000244038	DDOST	OST48_HUMAN	P39656	A_23_P149099	-0.303861	13.8488	-2.73033	0.0149003	0.775433	1
ENSG00000134146	DPH6	DPH6_HUMAN	Q7L8W6	A_24_P56557	-0.391363	10.026	-2.73014	0.0149061	0.775433	1
ENSG00000198270	TMEM116	TM116_HUMAN	Q8NCL8	A_23_P105619	0.269506	9.67462	2.72875	0.0149485	0.775433	1
ENSG00000158457	TSPAN33	TSN33_HUMAN	Q86UF1	A_32_P123652	-0.335569	8.29044	-2.72848	0.0149569	0.775433	1
ENSG00000270882	HIST1H4A	H4_HUMAN	P62805	A_23_P436281	-0.470938	12.1443	-2.72708	0.0149997	0.775433	1
ENSG00000270882	HIST1H4B	H4_HUMAN	P62805	A_23_P436281	-0.470938	12.1443	-2.72708	0.0149997	0.775433	1
ENSG00000270882	HIST1H4C	H4_HUMAN	P62805	A_23_P436281	-0.470938	12.1443	-2.72708	0.0149997	0.775433	1
ENSG00000270882	HIST1H4D	H4_HUMAN	P62805	A_23_P436281	-0.470938	12.1443	-2.72708	0.0149997	0.775433	1
ENSG00000270882	HIST1H4E	H4_HUMAN	P62805	A_23_P436281	-0.470938	12.1443	-2.72708	0.0149997	0.775433	1
ENSG00000270882	HIST1H4F	H4_HUMAN	P62805	A_23_P436281	-0.470938	12.1443	-2.72708	0.0149997	0.775433	1
ENSG00000270882	HIST1H4H	H4_HUMAN	P62805	A_23_P436281	-0.470938	12.1443	-2.72708	0.0149997	0.775433	1
ENSG00000270882	HIST1H4I	H4_HUMAN	P62805	A_23_P436281	-0.470938	12.1443	-2.72708	0.0149997	0.775433	1
ENSG00000270882	HIST1H4J	H4_HUMAN	P62805	A_23_P436281	-0.470938	12.1443	-2.72708	0.0149997	0.775433	1
ENSG00000270882	HIST1H4K	H4_HUMAN	P62805	A_23_P436281	-0.470938	12.1443	-2.72708	0.0149997	0.775433	1
ENSG00000270882	HIST1H4L	H4_HUMAN	P62805	A_23_P436281	-0.470938	12.1443	-2.72708	0.0149997	0.775433	1
ENSG00000270882	HIST2H4A	H4_HUMAN	P62805	A_23_P436281	-0.470938	12.1443	-2.72708	0.0149997	0.775433	1
ENSG00000270882	HIST2H4B	H4_HUMAN	P62805	A_23_P436281	-0.470938	12.1443	-2.72708	0.0149997	0.775433	1
ENSG00000270882	HIST4H4	H4_HUMAN	P62805	A_23_P436281	-0.470938	12.1443	-2.72708	0.0149997	0.775433	1
ENSG00000270276	HIST1H4A	H4_HUMAN	P62805	A_23_P436281	-0.470938	12.1443	-2.72708	0.0149997	0.775433	1
ENSG00000270276	HIST1H4B	H4_HUMAN	P62805	A_23_P436281	-0.470938	12.1443	-2.72708	0.0149997	0.775433	1
ENSG00000270276	HIST1H4C	H4_HUMAN	P62805	A_23_P436281	-0.470938	12.1443	-2.72708	0.0149997	0.775433	1
ENSG00000270276	HIST1H4D	H4_HUMAN	P62805	A_23_P436281	-0.470938	12.1443	-2.72708	0.0149997	0.775433	1
ENSG00000270276	HIST1H4E	H4_HUMAN	P62805	A_23_P436281	-0.470938	12.1443	-2.72708	0.0149997	0.775433	1
ENSG00000270276	HIST1H4F	H4_HUMAN	P62805	A_23_P436281	-0.470938	12.1443	-2.72708	0.0149997	0.775433	1
ENSG00000270276	HIST1H4H	H4_HUMAN	P62805	A_23_P436281	-0.470938	12.1443	-2.72708	0.0149997	0.775433	1
ENSG00000270276	HIST1H4I	H4_HUMAN	P62805	A_23_P436281	-0.470938	12.1443	-2.72708	0.0149997	0.775433	1
ENSG00000270276	HIST1H4J	H4_HUMAN	P62805	A_23_P436281	-0.470938	12.1443	-2.72708	0.0149997	0.775433	1
ENSG00000270276	HIST1H4K	H4_HUMAN	P62805	A_23_P436281	-0.470938	12.1443	-2.72708	0.0149997	0.775433	1
ENSG00000270276	HIST1H4L	H4_HUMAN	P62805	A_23_P436281	-0.470938	12.1443	-2.72708	0.0149997	0.775433	1
ENSG00000270276	HIST2H4A	H4_HUMAN	P62805	A_23_P436281	-0.470938	12.1443	-2.72708	0.0149997	0.775433	1
ENSG00000270276	HIST2H4B	H4_HUMAN	P62805	A_23_P436281	-0.470938	12.1443	-2.72708	0.0149997	0.775433	1
ENSG00000270276	HIST4H4	H4_HUMAN	P62805	A_23_P436281	-0.470938	12.1443	-2.72708	0.0149997	0.775433	1
ENSG00000078114	NEBL	NEBL_HUMAN	O76041	A_23_P104522	-0.248898	9.13148	-2.72577	0.0150402	0.775433	1
ENSG00000204805	-	-	-	A_23_P348979	-0.334281	8.04099	-2.72532	0.015054	0.775433	1
ENSG00000274026	-	-	-	A_23_P348979	-0.334281	8.04099	-2.72532	0.015054	0.775433	1
ENSG00000143006	DMRTB1	DMRTB_HUMAN	Q96MA1	A_23_P417821	-0.249632	7.27569	-2.72388	0.0150983	0.775433	1
ENSG00000221957	-	-	-	A_23_P130815	-0.290844	6.89352	-2.72374	0.0151027	0.775433	1
ENSG00000103021	CCDC113	CC113_HUMAN	Q9H0I3	A_24_P73730	0.267256	7.88395	2.7234	0.015113	0.775433	1
ENSG00000180921	FAM83H	FA83H_HUMAN	Q6ZRV2	A_23_P421175	-0.366418	11.5418	-2.72337	0.015114	0.775433	1
ENSG00000173898	SPTBN2	SPTN2_HUMAN	O15020	A_23_P98282	-0.278335	8.77314	-2.72299	0.0151259	0.775433	1
ENSG00000143612	C1orf43	CA043_HUMAN	Q9BWL3	A_23_P63243	-0.287944	12.5034	-2.7217	0.0151658	0.775433	1
ENSG00000023839	ABCC2	MRP2_HUMAN	Q92887	A_23_P44569	-0.273775	7.32946	-2.72101	0.0151873	0.775433	1
ENSG00000099330	OCEL1	OCEL1_HUMAN	Q9H607	A_23_P90523	-0.361829	9.58378	-2.72015	0.015214	0.775433	1
ENSG00000165457	FOLR2	FOLR2_HUMAN	P14207	A_23_P47709	0.271347	7.18887	2.71918	0.0152441	0.775433	1
ENSG00000147113	CXorf36	DIA1R_HUMAN	Q9H7Y0	A_24_P160225	0.326035	6.93834	2.71894	0.0152518	0.775433	1
ENSG00000006125	AP2B1	AP2B1_HUMAN	P63010	A_24_P253827	-0.287233	10.6232	-2.7186	0.0152625	0.775433	1
ENSG00000187239	FNBP1	FNBP1_HUMAN	Q96RU3	A_23_P32249	0.317148	9.33418	2.71802	0.0152805	0.775433	1
ENSG00000216657	-	-	-	A_24_P381029	0.313828	12.929	2.71789	0.0152844	0.775433	1
ENSG00000108010	GLRX3	GLRX3_HUMAN	O76003	A_24_P381029	0.313828	12.929	2.71789	0.0152844	0.775433	1
ENSG00000181408	UTS2R	UR2R_HUMAN	Q9UKP6	A_23_P146885	0.294217	13.5779	2.71742	0.0152991	0.775433	1
ENSG00000169856	ONECUT1	HNF6_HUMAN	Q9UBC0	A_23_P340717	-0.283813	7.17948	-2.71562	0.0153557	0.775433	1
ENSG00000171798	KNDC1	VKIND_HUMAN	Q76NI1	A_23_P414312	-0.344998	7.03049	-2.7133	0.0154287	0.775433	1
ENSG00000116459	ATP5F1	AT5F1_HUMAN	P24539	A_24_P659099	-0.324871	7.12355	-2.71295	0.0154398	0.775433	1
ENSG00000179085	DPM3	DPM3_HUMAN	Q9P2X0	A_24_P179925	-0.338437	12.2491	-2.71294	0.01544	0.775433	1
ENSG00000262402	-	-	-	A_24_P290188	0.379825	8.12916	2.71257	0.0154517	0.775433	1
ENSG00000171161	ZNF672	ZN672_HUMAN	Q499Z4	A_23_P83923	-0.28217	11.048	-2.71211	0.0154663	0.775433	1
ENSG00000224309	-	-	-	A_23_P321496	0.257269	7.14938	2.71009	0.0155304	0.775433	1
ENSG00000239521	GATS	GATS_HUMAN	Q8NAP1	A_23_P327777	0.35021	7.57922	2.70961	0.0155455	0.775433	1
ENSG00000184635	ZNF93	ZNF93_HUMAN	P35789	A_23_P124585	0.405272	10.851	2.70936	0.0155533	0.775433	1
ENSG00000186115	CYP4F2	CP4F2_HUMAN	P78329	A_24_P168495	0.520684	8.52625	2.70872	0.015574	0.775433	1
ENSG00000186529	CYP4F3	CP4F3_HUMAN	Q08477	A_24_P168495	0.520684	8.52625	2.70872	0.015574	0.775433	1
ENSG00000185379	RAD51D	RA51D_HUMAN	O75771	A_23_P500873	-0.293629	10.1328	-2.70653	0.0156437	0.775433	1
ENSG00000148842	CNNM2	CNNM2_HUMAN	Q9H8M5	A_24_P184154	-0.242973	7.35413	-2.70632	0.0156504	0.775433	1
ENSG00000255073	ZFP91-CNTF	-	-	A_24_P56052	-0.277714	9.61257	-2.70607	0.0156586	0.775433	1
ENSG00000186660	ZFP91	ZFP91_HUMAN	Q96JP5	A_24_P56052	-0.277714	9.61257	-2.70607	0.0156586	0.775433	1
ENSG00000102780	DGKH	DGKH_HUMAN	Q86XP1	A_23_P502980	0.32137	6.96878	2.70552	0.0156759	0.775433	1
ENSG00000148308	GTF3C5	TF3C5_HUMAN	Q9Y5Q8	A_23_P112406	-0.255632	12.6901	-2.70549	0.0156768	0.775433	1
ENSG00000232860	-	-	-	A_23_P412789	-0.288035	6.92953	-2.70483	0.0156982	0.775433	1
ENSG00000100351	GRAP2	GRAP2_HUMAN	O75791	A_24_P10884	-0.280139	6.97204	-2.70426	0.0157165	0.775433	1
ENSG00000275963	-	-	-	A_32_P94818	0.248308	7.0277	2.70323	0.0157496	0.775433	1
ENSG00000183760	PAPL	-	-	A_24_P53406	0.2526	7.13427	2.70252	0.0157726	0.775433	1
ENSG00000137054	POLR1E	RPA49_HUMAN	Q9GZS1	A_23_P9458	-0.29862	9.09982	-2.70241	0.015776	0.775433	1
ENSG00000159348	CYB5R1	NB5R1_HUMAN	Q9UHQ9	A_23_P52101	0.323655	10.3622	2.69979	0.0158605	0.775433	1
ENSG00000099282	TSPAN15	TSN15_HUMAN	O95858	A_32_P7015	-0.308008	7.74349	-2.69952	0.0158695	0.775433	1
ENSG00000105085	MED26	MED26_HUMAN	O95402	A_23_P317854	-0.276814	7.54638	-2.6981	0.0159156	0.775433	1
ENSG00000163607	GTPBP8	GTPB8_HUMAN	Q8N3Z3	A_23_P92281	-0.364812	12.3627	-2.69694	0.0159531	0.775433	1
ENSG00000166707	ZCCHC18	ZCC18_HUMAN	P0CG32	A_32_P116989	0.320319	7.97299	2.69644	0.0159696	0.775433	1
ENSG00000102900	NUP93	NUP93_HUMAN	Q8N1F7	A_23_P89056	-0.273761	11.6657	-2.69627	0.0159752	0.775433	1
ENSG00000205302	SNX2	SNX2_HUMAN	O60749	A_23_P7697	0.286467	12.9138	2.69575	0.015992	0.775433	1
ENSG00000035928	RFC1	RFC1_HUMAN	P35251	A_24_P136807	-0.404817	11.899	-2.69575	0.0159922	0.775433	1
ENSG00000101290	CDS2	CDS2_HUMAN	O95674	A_24_P271363	0.315084	10.3865	2.6952	0.0160101	0.775433	1
ENSG00000175189	INHBC	INHBC_HUMAN	P55103	A_24_P155502	-0.296876	7.54597	-2.69414	0.0160448	0.775433	1
ENSG00000166750	SLFN5	SLFN5_HUMAN	Q08AF3	A_32_P67223	-0.463923	6.99486	-2.69399	0.0160497	0.775433	1
ENSG00000161132	-	-	-	A_24_P83758	-0.426471	8.80153	-2.69316	0.0160768	0.775433	1
ENSG00000163374	DKFZp686J14104	YYAP1_HUMAN	Q9H869	A_23_P103661	0.279807	11.8046	2.69249	0.0160988	0.775433	1
ENSG00000163374	YY1AP1	YYAP1_HUMAN	Q9H869	A_23_P103661	0.279807	11.8046	2.69249	0.0160988	0.775433	1
ENSG00000266522	-	-	-	A_24_P477102	-0.341757	10.0017	-2.69158	0.0161288	0.775433	1
ENSG00000232760	-	-	-	A_24_P477102	-0.341757	10.0017	-2.69158	0.0161288	0.775433	1
ENSG00000008438	PGLYRP1	PGRP1_HUMAN	O75594	A_23_P208747	-0.396617	7.03255	-2.69101	0.0161475	0.775433	1
ENSG00000246705	H2AFJ	H2AJ_HUMAN	Q9BTM1	A_24_P236003	-0.288464	12.7866	-2.69096	0.0161491	0.775433	1
ENSG00000198089	SFI1	SFI1_HUMAN	A8K8P3	A_24_P242021	-0.299054	8.17499	-2.69026	0.0161725	0.775433	1
ENSG00000157540	DYRK1A	DYR1A_HUMAN	Q13627	A_24_P62169	-0.286505	7.90061	-2.69021	0.016174	0.775433	1
ENSG00000157540	MNB/DYRK	DYR1A_HUMAN	Q13627	A_24_P62169	-0.286505	7.90061	-2.69021	0.016174	0.775433	1
ENSG00000277895	-	-	-	A_24_P918175	-0.275574	7.06745	-2.68947	0.0161985	0.775433	1
ENSG00000119711	ALDH6A1	MMSA_HUMAN	Q02252	A_23_P128967	-0.301063	11.2112	-2.68898	0.0162148	0.775433	1
ENSG00000167074	TEF	TEF_HUMAN	Q10587	A_23_P91757	0.4155	7.12782	2.68837	0.016235	0.775433	1
ENSG00000196839	ADA	ADA_HUMAN	P00813	A_23_P210482	0.283109	12.2889	2.68829	0.0162374	0.775433	1
ENSG00000142002	DPP9	DPP9_HUMAN	Q86TI2	A_24_P288323	-0.290846	7.44518	-2.68739	0.0162672	0.775433	1
ENSG00000196352	CD55	DAF_HUMAN	P08174	A_24_P188377	-0.39993	9.48906	-2.68735	0.0162687	0.775433	1
ENSG00000130731	C16orf13	CP013_HUMAN	Q96S19	A_23_P206498	-0.318807	13.1466	-2.68708	0.0162776	0.775433	1
ENSG00000271079	CTAGE15	CTGEF_HUMAN	A4D2H0	A_24_P67280	0.259075	8.85885	2.68648	0.0162977	0.775433	1
ENSG00000271321	CTAGE6	CTGE6_HUMAN	Q86UF2	A_24_P67280	0.259075	8.85885	2.68648	0.0162977	0.775433	1
ENSG00000175066	GK5	GLPK5_HUMAN	Q6ZS86	A_24_P362805	-0.322592	7.44908	-2.68635	0.0163021	0.775433	1
ENSG00000161180	CCDC116	CC116_HUMAN	Q8IYX3	A_23_P342108	-0.325419	7.19321	-2.68617	0.016308	0.775433	1
ENSG00000271601	LIX1L	LIX1L_HUMAN	Q8IVB5	A_23_P342744	0.439602	9.41358	2.68602	0.0163129	0.775433	1
ENSG00000069812	HES2	HES2_HUMAN	Q9Y543	A_23_P201687	0.263106	7.58652	2.68494	0.0163488	0.775433	1
ENSG00000082515	MRPL22	RM22_HUMAN	Q9NWU5	A_23_P122233	0.421751	13.7399	2.68407	0.0163779	0.775433	1
ENSG00000140941	MAP1LC3B	MLP3B_HUMAN	Q9GZQ8	A_24_P108005	0.313737	11.4622	2.68356	0.016395	0.775433	1
ENSG00000179673	RPRML	RPRML_HUMAN	Q8N4K4	A_32_P3476	-0.349409	7.86011	-2.68307	0.0164112	0.775433	1
ENSG00000078399	HOXA9	HXA9_HUMAN	P31269	A_23_P500998	0.346966	6.97924	2.68265	0.0164254	0.775433	1
ENSG00000161654	LSM12	LSM12_HUMAN	Q3MHD2	A_23_P307430	-0.318052	11.7949	-2.68205	0.0164455	0.775433	1
ENSG00000172264	MACROD2	MACD2_HUMAN	A1Z1Q3	A_23_P22398	-0.317861	7.92408	-2.68145	0.0164657	0.775433	1
ENSG00000146242	TPBG	TPBG_HUMAN	Q13641	A_24_P582889	-0.33868	7.161	-2.67957	0.016529	0.775433	1
ENSG00000197070	ARRDC1	ARRD1_HUMAN	Q8N5I2	A_23_P332316	-0.28192	8.38659	-2.67785	0.016587	0.775433	1
ENSG00000124256	ZBP1	ZBP1_HUMAN	Q9H171	A_24_P395966	0.239559	7.10208	2.67774	0.0165907	0.775433	1
ENSG00000157766	ACAN	-	-	A_24_P919150	-0.272254	7.22307	-2.67625	0.0166412	0.775433	1
ENSG00000184588	PDE4B	PDE4B_HUMAN	Q07343	A_24_P325333	-0.324911	7.39261	-2.67601	0.0166495	0.775433	1
ENSG00000225981	-	-	-	A_32_P116391	0.31331	6.92041	2.67546	0.016668	0.775433	1
ENSG00000109101	FOXN1	FOXN1_HUMAN	O15353	A_23_P118693	0.303412	7.39862	2.67533	0.0166727	0.775433	1
ENSG00000241233	KRTAP5-8	KRA58_HUMAN	O75690	A_23_P47086	0.363244	9.40223	2.67504	0.0166825	0.775433	1
ENSG00000254997	KRTAP5-9	KRA59_HUMAN	P26371	A_23_P13048	0.255446	8.27653	2.67449	0.016701	0.775433	1
ENSG00000181396	OGFOD3	OGFD3_HUMAN	Q6PK18	A_24_P364954	-0.270517	9.1136	-2.67403	0.0167169	0.775433	1
ENSG00000203710	CR1	CR1_HUMAN	P17927	A_23_P256821	0.276708	7.04056	2.67393	0.0167203	0.775433	1
ENSG00000197721	CR1L	CR1L_HUMAN	Q2VPA4	A_23_P256821	0.276708	7.04056	2.67393	0.0167203	0.775433	1
ENSG00000234911	-	-	-	A_32_P166467	0.29824	7.05464	2.67382	0.0167239	0.775433	1
ENSG00000025434	NR1H3	NR1H3_HUMAN	Q13133	A_23_P47135	-0.368366	11.5093	-2.6736	0.0167314	0.775433	1
ENSG00000183018	SPNS2	SPNS2_HUMAN	Q8IVW8	A_24_P230173	0.283252	7.17853	2.67349	0.016735	0.775433	1
ENSG00000066294	CD84	SLAF5_HUMAN	Q9UIB8	A_32_P58215	-0.357084	6.92817	-2.67116	0.0168147	0.775433	1
ENSG00000183484	GPR132	GP132_HUMAN	Q9UNW8	A_24_P201994	-0.242041	7.09297	-2.67049	0.0168378	0.775433	1
ENSG00000205765	C5orf51	CE051_HUMAN	A6NDU8	A_32_P6832	-0.25723	11.5818	-2.67024	0.0168465	0.775433	1
ENSG00000132286	TIMM10B	T10B_HUMAN	Q9Y5J6	A_23_P127851	0.360157	9.58607	2.66946	0.0168731	0.775433	1
ENSG00000221914	PPP2R2A	2ABA_HUMAN	P63151	A_23_P123539	-0.362531	12.0303	-2.66915	0.0168837	0.775433	1
ENSG00000144893	MED12L	MD12L_HUMAN	Q86YW9	A_32_P701268	0.284798	7.36605	2.66872	0.0168988	0.775433	1
ENSG00000081760	AACS	AACS_HUMAN	Q86V21	A_23_P204395	-0.308574	11.1729	-2.66852	0.0169057	0.775433	1
ENSG00000008294	SPAG9	JIP4_HUMAN	O60271	A_23_P207476	-0.299334	8.04574	-2.66697	0.0169591	0.775433	1
ENSG00000198914	POU3F3	PO3F3_HUMAN	P20264	A_24_P34575	0.408962	12.112	2.66557	0.0170074	0.775433	1
ENSG00000136451	VEZF1	VEZF1_HUMAN	Q14119	A_24_P924591	-0.273089	10.8921	-2.66545	0.0170115	0.775433	1
ENSG00000101000	PROCR	EPCR_HUMAN	Q9UNN8	A_23_P80040	-0.323588	9.79578	-2.66478	0.017035	0.775433	1
ENSG00000279307	-	-	-	A_23_P360983	-0.408527	11.6468	-2.66466	0.0170392	0.775433	1
ENSG00000164182	NDUFAF2	MIMIT_HUMAN	Q8N183	A_23_P360983	-0.408527	11.6468	-2.66466	0.0170392	0.775433	1
ENSG00000164967	RPP25L	RP25L_HUMAN	Q8N5L8	A_23_P169409	-0.311212	13.2047	-2.66415	0.0170569	0.775433	1
ENSG00000109736	MFSD10	MFS10_HUMAN	Q14728	A_23_P41246	-0.305981	10.7704	-2.66369	0.0170727	0.775433	1
ENSG00000100664	EIF5	IF5_HUMAN	P55010	A_24_P398810	0.320604	8.7013	2.66362	0.0170751	0.775433	1
ENSG00000169684	CHRNA5	ACHA5_HUMAN	P30532	A_23_P88691	-0.299661	9.77834	-2.6636	0.0170759	0.775433	1
ENSG00000116747	TROVE2	RO60_HUMAN	P10155	A_24_P921260	0.241363	11.6153	2.66291	0.0171	0.775433	1
ENSG00000255085	-	-	-	A_32_P45202	-0.264821	6.99027	-2.66159	0.0171459	0.775433	1
ENSG00000279376	-	-	-	A_24_P63397	0.279282	8.8741	2.66145	0.0171508	0.775433	1
ENSG00000158869	FCER1G	FCERG_HUMAN	P30273	A_23_P160849	0.346875	9.60711	2.6593	0.0172262	0.775433	1
ENSG00000173227	SYT12	SYT12_HUMAN	Q8IV01	A_23_P424648	0.360101	6.92421	2.65862	0.0172499	0.775433	1
ENSG00000089327	FXYD5	FXYD5_HUMAN	Q96DB9	A_23_P130995	-0.299746	10.3614	-2.65784	0.0172772	0.775433	1
ENSG00000166575	TMEM135	TM135_HUMAN	Q86UB9	A_24_P127075	-0.292713	7.86609	-2.65627	0.0173327	0.775433	1
ENSG00000250151	ARPC4-TTLL3	-	-	A_23_P29566	-0.291757	10.2519	-2.65596	0.0173436	0.775433	1
ENSG00000241553	ARPC4	ARPC4_HUMAN	P59998	A_23_P29566	-0.291757	10.2519	-2.65596	0.0173436	0.775433	1
ENSG00000153179	RASSF3	RASF3_HUMAN	Q86WH2	A_32_P201868	-0.278224	12.1348	-2.65482	0.017384	0.775433	1
ENSG00000215114	UBXN2B	UBX2B_HUMAN	Q14CS0	A_32_P148796	0.271459	9.58051	2.65432	0.0174015	0.775433	1
ENSG00000197079	KRT35	KRT35_HUMAN	Q92764	A_23_P78201	0.339437	7.11994	2.65409	0.0174099	0.775433	1
ENSG00000186812	ZNF397	ZN397_HUMAN	Q8NF99	A_23_P208143	-0.385089	9.75698	-2.6537	0.0174235	0.775433	1
ENSG00000152492	CCDC50	CCD50_HUMAN	Q8IVM0	A_24_P51786	-0.309128	10.8765	-2.65357	0.0174283	0.775433	1
ENSG00000177508	IRX3	IRX3_HUMAN	P78415	A_24_P207195	0.488985	12.3329	2.65233	0.0174723	0.775433	1
ENSG00000163159	VPS72	VPS72_HUMAN	Q15906	A_23_P115215	-0.27291	12.7287	-2.65198	0.0174847	0.775433	1
ENSG00000172037	LAMB2	LAMB2_HUMAN	P55268	A_23_P21382	-0.316814	12.7676	-2.65154	0.0175004	0.775433	1
ENSG00000172046	USP19	UBP19_HUMAN	O94966	A_23_P21382	-0.316814	12.7676	-2.65154	0.0175004	0.775433	1
ENSG00000254851	-	-	-	A_23_P203095	-0.297526	8.34829	-2.65152	0.017501	0.775433	1
ENSG00000160613	PCSK7	PCSK7_HUMAN	Q16549	A_23_P203095	-0.297526	8.34829	-2.65152	0.017501	0.775433	1
ENSG00000276840	-	-	-	A_32_P57728	0.243888	10.8708	2.65092	0.0175225	0.775433	1
ENSG00000174384	-	-	-	A_32_P57728	0.243888	10.8708	2.65092	0.0175225	0.775433	1
ENSG00000273598	-	-	-	A_32_P57728	0.243888	10.8708	2.65092	0.0175225	0.775433	1
ENSG00000278416	-	-	-	A_32_P57728	0.243888	10.8708	2.65092	0.0175225	0.775433	1
ENSG00000273897	-	-	-	A_32_P57728	0.243888	10.8708	2.65092	0.0175225	0.775433	1
ENSG00000277125	-	-	-	A_32_P57728	0.243888	10.8708	2.65092	0.0175225	0.775433	1
ENSG00000078319	-	-	-	A_32_P57728	0.243888	10.8708	2.65092	0.0175225	0.775433	1
ENSG00000229018	-	-	-	A_32_P57728	0.243888	10.8708	2.65092	0.0175225	0.775433	1
ENSG00000259208	-	-	-	A_24_P780609	-0.243206	12.4581	-2.65048	0.0175382	0.775433	1
ENSG00000143569	UBAP2L	UBP2L_HUMAN	Q14157	A_23_P103837	-0.392392	10.1713	-2.65029	0.017545	0.775433	1
ENSG00000196747	HIST1H2AG	H2A1_HUMAN	P0C0S8	A_24_P394510	-0.386008	12.4446	-2.64977	0.0175636	0.775433	1
ENSG00000196747	HIST1H2AI	H2A1_HUMAN	P0C0S8	A_24_P394510	-0.386008	12.4446	-2.64977	0.0175636	0.775433	1
ENSG00000196747	HIST1H2AK	H2A1_HUMAN	P0C0S8	A_24_P394510	-0.386008	12.4446	-2.64977	0.0175636	0.775433	1
ENSG00000196747	HIST1H2AL	H2A1_HUMAN	P0C0S8	A_24_P394510	-0.386008	12.4446	-2.64977	0.0175636	0.775433	1
ENSG00000196747	HIST1H2AM	H2A1_HUMAN	P0C0S8	A_24_P394510	-0.386008	12.4446	-2.64977	0.0175636	0.775433	1
ENSG00000276368	HIST1H2AJ	H2A1J_HUMAN	Q99878	A_24_P394510	-0.386008	12.4446	-2.64977	0.0175636	0.775433	1
ENSG00000164303	ENPP6	ENPP6_HUMAN	Q6UWR7	A_24_P397255	-0.351123	6.84861	-2.64922	0.0175831	0.775433	1
ENSG00000103202	NME4	NDKM_HUMAN	O00746	A_24_P210829	-0.314169	12.9823	-2.64893	0.0175937	0.775433	1
ENSG00000134153	EMC7	EMC7_HUMAN	Q9NPA0	A_23_P88680	-0.233923	13.1134	-2.64828	0.0176167	0.775433	1
ENSG00000169738	DCXR	DCXR_HUMAN	Q7Z4W1	A_23_P44166	-0.297099	12.1823	-2.64746	0.0176462	0.775433	1
ENSG00000167397	VKORC1	VKOR1_HUMAN	Q9BQB6	A_23_P100486	-0.234814	12.6284	-2.64579	0.0177062	0.775433	1
ENSG00000153789	FAM92B	FA92B_HUMAN	Q6ZTR7	A_32_P56624	0.346153	7.13149	2.64548	0.0177174	0.775433	1
ENSG00000278463	HIST1H2AB	H2A1B_HUMAN	P04908	A_24_P223384	-0.401246	9.6179	-2.6445	0.017753	0.775433	1
ENSG00000278463	HIST1H2AE	H2A1B_HUMAN	P04908	A_24_P223384	-0.401246	9.6179	-2.6445	0.017753	0.775433	1
ENSG00000196136	SERPINA3	AACT_HUMAN	P01011	A_23_P2920	-0.324187	7.01322	-2.64439	0.0177567	0.775433	1
ENSG00000273259	SERPINA3	AACT_HUMAN	P01011	A_23_P2920	-0.324187	7.01322	-2.64439	0.0177567	0.775433	1
ENSG00000180884	ZNF792	ZN792_HUMAN	Q3KQV3	A_23_P67618	-0.308437	9.44608	-2.64418	0.0177644	0.775433	1
ENSG00000157741	UBN2	UBN2_HUMAN	Q6ZU65	A_23_P93994	-0.340423	7.37045	-2.64283	0.0178131	0.775433	1
ENSG00000137269	LRRC1	LRRC1_HUMAN	Q9BTT6	A_23_P377350	-0.283492	7.08715	-2.64252	0.0178243	0.775433	1
ENSG00000261269	-	-	-	A_32_P6646	-0.384111	7.00442	-2.6418	0.0178506	0.775433	1
ENSG00000235916	-	-	-	A_23_P81212	-0.267616	13.1359	-2.64178	0.0178514	0.775433	1
ENSG00000245281	-	-	-	A_23_P81212	-0.267616	13.1359	-2.64178	0.0178514	0.775433	1
ENSG00000163319	MRPS18C	RT18C_HUMAN	Q9Y3D5	A_23_P81212	-0.267616	13.1359	-2.64178	0.0178514	0.775433	1
ENSG00000198106	SNX29P2	S29P2_HUMAN	Q8IUI4	A_32_P107002	-0.267645	7.13815	-2.6392	0.0179451	0.775433	1
ENSG00000271699	-	-	-	A_32_P107002	-0.267645	7.13815	-2.6392	0.0179451	0.775433	1
ENSG00000048471	SNX29	SNX29_HUMAN	Q8TEQ0	A_32_P107002	-0.267645	7.13815	-2.6392	0.0179451	0.775433	1
ENSG00000158482	-	-	-	A_32_P107002	-0.267645	7.13815	-2.6392	0.0179451	0.775433	1
ENSG00000104369	JPH1	JPH1_HUMAN	Q9HDC5	A_23_P434253	-0.268785	7.63275	-2.63665	0.0180383	0.775433	1
ENSG00000047346	FAM214A	F214A_HUMAN	Q32MH5	A_23_P99853	0.328019	10.8671	2.63599	0.0180627	0.775433	1
ENSG00000172432	GTPBP2	GTPB2_HUMAN	Q9BX10	A_24_P77826	0.314878	7.13153	2.63497	0.0181002	0.775433	1
ENSG00000276180	HIST1H4A	H4_HUMAN	P62805	A_24_P20873	-0.35857	11.6963	-2.63379	0.0181435	0.775433	1
ENSG00000276180	HIST1H4B	H4_HUMAN	P62805	A_24_P20873	-0.35857	11.6963	-2.63379	0.0181435	0.775433	1
ENSG00000276180	HIST1H4C	H4_HUMAN	P62805	A_24_P20873	-0.35857	11.6963	-2.63379	0.0181435	0.775433	1
ENSG00000276180	HIST1H4D	H4_HUMAN	P62805	A_24_P20873	-0.35857	11.6963	-2.63379	0.0181435	0.775433	1
ENSG00000276180	HIST1H4E	H4_HUMAN	P62805	A_24_P20873	-0.35857	11.6963	-2.63379	0.0181435	0.775433	1
ENSG00000276180	HIST1H4F	H4_HUMAN	P62805	A_24_P20873	-0.35857	11.6963	-2.63379	0.0181435	0.775433	1
ENSG00000276180	HIST1H4H	H4_HUMAN	P62805	A_24_P20873	-0.35857	11.6963	-2.63379	0.0181435	0.775433	1
ENSG00000276180	HIST1H4I	H4_HUMAN	P62805	A_24_P20873	-0.35857	11.6963	-2.63379	0.0181435	0.775433	1
ENSG00000276180	HIST1H4J	H4_HUMAN	P62805	A_24_P20873	-0.35857	11.6963	-2.63379	0.0181435	0.775433	1
ENSG00000276180	HIST1H4K	H4_HUMAN	P62805	A_24_P20873	-0.35857	11.6963	-2.63379	0.0181435	0.775433	1
ENSG00000276180	HIST1H4L	H4_HUMAN	P62805	A_24_P20873	-0.35857	11.6963	-2.63379	0.0181435	0.775433	1
ENSG00000276180	HIST2H4A	H4_HUMAN	P62805	A_24_P20873	-0.35857	11.6963	-2.63379	0.0181435	0.775433	1
ENSG00000276180	HIST2H4B	H4_HUMAN	P62805	A_24_P20873	-0.35857	11.6963	-2.63379	0.0181435	0.775433	1
ENSG00000276180	HIST4H4	H4_HUMAN	P62805	A_24_P20873	-0.35857	11.6963	-2.63379	0.0181435	0.775433	1
ENSG00000164576	SAP30L	SP30L_HUMAN	Q9HAJ7	A_23_P368101	-0.330964	10.9917	-2.63378	0.0181438	0.775433	1
ENSG00000132824	SERINC3	SERC3_HUMAN	Q13530	A_23_P79836	0.336166	12.2129	2.63067	0.018259	0.775433	1
ENSG00000228253	MT-ATP8	ATP8_HUMAN	P03928	A_24_P350196	-0.444	16.2771	-2.63054	0.0182636	0.775433	1
ENSG00000198899	MT-ATP6	ATP6_HUMAN	P00846	A_24_P350196	-0.444	16.2771	-2.63054	0.0182636	0.775433	1
ENSG00000198938	MT-CO3	COX3_HUMAN	P00414	A_24_P350196	-0.444	16.2771	-2.63054	0.0182636	0.775433	1
ENSG00000198744	-	-	-	A_24_P350196	-0.444	16.2771	-2.63054	0.0182636	0.775433	1
ENSG00000248527	-	-	-	A_24_P350196	-0.444	16.2771	-2.63054	0.0182636	0.775433	1
ENSG00000240409	-	-	-	A_24_P350196	-0.444	16.2771	-2.63054	0.0182636	0.775433	1
ENSG00000228589	-	-	-	A_23_P2143	0.258187	11.8818	2.62915	0.0183153	0.775433	1
ENSG00000118363	SPCS2	SPCS2_HUMAN	Q15005	A_23_P2143	0.258187	11.8818	2.62915	0.0183153	0.775433	1
ENSG00000099977	DDT	DOPD_HUMAN	P30046	A_23_P17769	-0.306903	13.7554	-2.6288	0.0183285	0.775433	1
ENSG00000104537	ANXA13	ANX13_HUMAN	P27216	A_23_P60006	-0.359841	6.95514	-2.62857	0.0183369	0.775433	1
ENSG00000050165	DKK3	DKK3_HUMAN	Q9UBP4	A_24_P918317	-0.280594	10.91	-2.62686	0.018401	0.775433	1
ENSG00000175471	MCTP1	MCTP1_HUMAN	Q6DN14	A_23_P133293	0.338012	7.50885	2.62652	0.0184134	0.775433	1
ENSG00000126778	SIX1	SIX1_HUMAN	Q15475	A_23_P76914	-0.311339	7.07193	-2.62618	0.0184264	0.775433	1
ENSG00000100678	SLC8A3	NAC3_HUMAN	P57103	A_24_P167654	0.341166	7.08849	2.6256	0.0184481	0.775433	1
ENSG00000236914	-	-	-	A_32_P166031	0.273508	7.10844	2.6255	0.0184519	0.775433	1
ENSG00000005981	ASB4	ASB4_HUMAN	Q9Y574	A_23_P157205	0.243274	7.86936	2.62526	0.0184608	0.775433	1
ENSG00000136856	SLC2A8	GTR8_HUMAN	Q9NY64	A_24_P64182	-0.299837	10.2995	-2.62431	0.0184963	0.775433	1
ENSG00000214063	TSPAN4	TSN4_HUMAN	O14817	A_23_P60856	-0.262453	11.8269	-2.62307	0.018543	0.775433	1
ENSG00000005421	PON1	PON1_HUMAN	P27169	A_23_P168598	-0.246965	6.97492	-2.62294	0.0185477	0.775433	1
ENSG00000279824	-	-	-	A_24_P289709	-0.266779	6.89364	-2.62289	0.0185498	0.775433	1
ENSG00000279346	-	-	-	A_24_P289709	-0.266779	6.89364	-2.62289	0.0185498	0.775433	1
ENSG00000172830	SSH3	SSH3_HUMAN	Q8TE77	A_24_P266734	-0.304505	11.495	-2.6225	0.0185643	0.775433	1
ENSG00000075234	TTC38	TTC38_HUMAN	Q5R3I4	A_23_P254193	-0.271483	10.8279	-2.62154	0.0186005	0.775433	1
ENSG00000273983	HIST1H3A	H31_HUMAN	P68431	A_23_P42198	-0.300239	13.0921	-2.62135	0.0186077	0.775433	1
ENSG00000273983	HIST1H3B	H31_HUMAN	P68431	A_23_P42198	-0.300239	13.0921	-2.62135	0.0186077	0.775433	1
ENSG00000273983	HIST1H3C	H31_HUMAN	P68431	A_23_P42198	-0.300239	13.0921	-2.62135	0.0186077	0.775433	1
ENSG00000273983	HIST1H3D	H31_HUMAN	P68431	A_23_P42198	-0.300239	13.0921	-2.62135	0.0186077	0.775433	1
ENSG00000273983	HIST1H3E	H31_HUMAN	P68431	A_23_P42198	-0.300239	13.0921	-2.62135	0.0186077	0.775433	1
ENSG00000273983	HIST1H3F	H31_HUMAN	P68431	A_23_P42198	-0.300239	13.0921	-2.62135	0.0186077	0.775433	1
ENSG00000273983	HIST1H3G	H31_HUMAN	P68431	A_23_P42198	-0.300239	13.0921	-2.62135	0.0186077	0.775433	1
ENSG00000273983	HIST1H3H	H31_HUMAN	P68431	A_23_P42198	-0.300239	13.0921	-2.62135	0.0186077	0.775433	1
ENSG00000273983	HIST1H3I	H31_HUMAN	P68431	A_23_P42198	-0.300239	13.0921	-2.62135	0.0186077	0.775433	1
ENSG00000273983	HIST1H3J	H31_HUMAN	P68431	A_23_P42198	-0.300239	13.0921	-2.62135	0.0186077	0.775433	1
ENSG00000099381	SETD1A	SET1A_HUMAN	O15047	A_23_P129678	-0.277543	8.50468	-2.62121	0.0186132	0.775433	1
ENSG00000127483	HP1BP3	HP1B3_HUMAN	Q5SSJ5	A_24_P944616	0.316982	11.4065	2.62085	0.0186266	0.775433	1
ENSG00000166025	AMOTL1	AMOL1_HUMAN	Q8IY63	A_23_P138796	0.399594	11.0956	2.61997	0.0186601	0.775433	1
ENSG00000168016	TRANK1	TRNK1_HUMAN	O15050	A_24_P68079	0.287378	7.28793	2.61994	0.0186612	0.775433	1
ENSG00000186815	TPCN1	TPC1_HUMAN	Q9ULQ1	A_23_P308119	-0.277589	7.30355	-2.6178	0.0187426	0.775433	1
ENSG00000111674	ENO2	ENOG_HUMAN	P09104	A_24_P236091	-0.403449	9.68626	-2.6174	0.0187576	0.775433	1
ENSG00000203688	-	-	-	A_24_P522786	-0.341823	7.0739	-2.61717	0.0187665	0.775433	1
ENSG00000013297	CLDN11	CLD11_HUMAN	O75508	A_23_P405088	0.332815	9.7505	2.61695	0.0187746	0.775433	1
ENSG00000164976	KIAA1161	K1161_HUMAN	Q6NSJ0	A_32_P405703	-0.249325	8.49737	-2.61579	0.0188192	0.775433	1
ENSG00000198003	CCDC151	CC151_HUMAN	A5D8V7	A_23_P326893	-0.287297	8.6556	-2.61498	0.0188498	0.775433	1
ENSG00000063241	ISOC2	ISOC2_HUMAN	Q96AB3	A_23_P153418	-0.337664	12.7723	-2.61447	0.0188696	0.775433	1
ENSG00000256223	ZNF10	ZNF10_HUMAN	P21506	A_24_P215475	-0.356282	9.10026	-2.61406	0.0188852	0.775433	1
ENSG00000172331	BPGM	PMGE_HUMAN	P07738	A_23_P70843	-0.30715	10.3463	-2.61362	0.0189019	0.775433	1
ENSG00000118689	FOXO3	FOXO3_HUMAN	O43524	A_23_P345575	-0.299272	9.29961	-2.61354	0.0189051	0.775433	1
ENSG00000240445	-	-	-	A_23_P345575	-0.299272	9.29961	-2.61354	0.0189051	0.775433	1
ENSG00000213625	LEPROT	OBRG_HUMAN	O15243	A_23_P1126	-0.311407	12.2536	-2.61306	0.0189235	0.775433	1
ENSG00000155367	PPM1J	PPM1J_HUMAN	Q5JR12	A_23_P201939	-0.26465	8.84261	-2.61244	0.0189472	0.775433	1
ENSG00000271810	-	-	-	A_23_P201939	-0.26465	8.84261	-2.61244	0.0189472	0.775433	1
ENSG00000185186	-	-	-	A_23_P381489	0.240064	6.96312	2.61244	0.0189473	0.775433	1
ENSG00000280191	-	-	-	A_23_P381489	0.240064	6.96312	2.61244	0.0189473	0.775433	1
ENSG00000133997	MED6	MED6_HUMAN	O75586	A_24_P318319	0.269467	9.26011	2.61157	0.0189808	0.775433	1
ENSG00000165841	CYP2C19	CP2CJ_HUMAN	P33261	A_23_P158484	0.336705	7.03554	2.61046	0.0190234	0.775433	1
ENSG00000108242	CYP2C18	CP2CI_HUMAN	P33260	A_23_P158484	0.336705	7.03554	2.61046	0.0190234	0.775433	1
ENSG00000276490	-	-	-	A_23_P158484	0.336705	7.03554	2.61046	0.0190234	0.775433	1
ENSG00000138109	CYP2C9	CP2C9_HUMAN	P11712	A_23_P158484	0.336705	7.03554	2.61046	0.0190234	0.775433	1
ENSG00000172239	PAIP1	PAIP1_HUMAN	Q9H074	A_24_P77681	0.280088	11.1051	2.60985	0.0190469	0.775433	1
ENSG00000174977	-	-	-	A_24_P77681	0.280088	11.1051	2.60985	0.0190469	0.775433	1
ENSG00000181218	HIST3H2A	H2A3_HUMAN	Q7L7L0	A_23_P149301	-0.335533	12.9136	-2.60959	0.0190573	0.775433	1
ENSG00000119013	NDUFB3	NDUB3_HUMAN	O43676	A_23_P51009	-0.246719	13.853	-2.60886	0.0190855	0.775433	1
ENSG00000172270	BSG	BASI_HUMAN	P35613	A_24_P202769	-0.246286	13.4296	-2.60744	0.0191405	0.775433	1
ENSG00000155066	PROM2	PROM2_HUMAN	Q8N271	A_23_P154358	0.264296	7.0538	2.60407	0.0192716	0.775433	1
ENSG00000005844	ITGAL	ITAL_HUMAN	P20701	A_23_P206806	-0.408498	6.97844	-2.60395	0.0192762	0.775433	1
ENSG00000157637	SLC38A10	S38AA_HUMAN	Q9HBR0	A_23_P55011	0.249209	12.6209	2.60362	0.0192894	0.775433	1
ENSG00000109332	UBE2D3	UB2D3_HUMAN	P61077	A_24_P926684	-0.34956	7.1062	-2.60326	0.0193032	0.775433	1
ENSG00000173421	CCDC36	CCD36_HUMAN	Q8IYA8	A_24_P134765	0.523513	7.04831	2.60319	0.019306	0.775433	1
ENSG00000090006	LTBP4	LTBP4_HUMAN	Q8N2S1	A_23_P141946	-0.277744	11.2551	-2.60013	0.0194261	0.775433	1
ENSG00000213787	-	-	-	A_24_P238316	0.259094	14.2669	2.59939	0.0194554	0.775433	1
ENSG00000170260	ZNF212	ZN212_HUMAN	Q9UDV6	A_23_P415558	-0.249004	10.3329	-2.5993	0.0194587	0.775433	1
ENSG00000133193	FAM104A	F104A_HUMAN	Q969W3	A_24_P91238	-0.217092	9.12236	-2.5986	0.0194863	0.775433	1
ENSG00000119121	TRPM6	TRPM6_HUMAN	Q9BX84	A_24_P32692	-0.308781	6.99172	-2.59599	0.0195899	0.775433	1
ENSG00000120254	MTHFD1L	C1TM_HUMAN	Q6UB35	A_23_P214908	0.27268	11.1919	2.59532	0.0196165	0.775433	1
ENSG00000164292	RHOBTB3	RHBT3_HUMAN	O94955	A_23_P92710	0.379539	11.4648	2.5942	0.019661	0.775433	1
ENSG00000242371	-	-	-	A_23_P21260	0.289553	7.07399	2.59405	0.0196668	0.775433	1
ENSG00000251546	IGKV1D-39	-	-	A_23_P21260	0.289553	7.07399	2.59405	0.0196668	0.775433	1
ENSG00000166532	RIMKLB	RIMKB_HUMAN	Q9ULI2	A_23_P361841	0.315557	8.42169	2.59382	0.0196761	0.775433	1
ENSG00000148719	DNAJB12	DJB12_HUMAN	Q9NXW2	A_24_P244096	0.310694	10.0912	2.59335	0.0196946	0.775433	1
ENSG00000168137	SETD5	SETD5_HUMAN	Q9C0A6	A_23_P92035	-0.27627	10.1239	-2.59214	0.019743	0.775433	1
ENSG00000141744	PNMT	PNMT_HUMAN	P11086	A_23_P100642	-0.310847	8.01438	-2.59209	0.0197451	0.775433	1
ENSG00000183715	OPCML	OPCM_HUMAN	Q14982	A_23_P72663	-0.317522	7.16414	-2.59079	0.019797	0.775433	1
ENSG00000107036	RIC1	RIC1_HUMAN	Q4ADV7	A_24_P49447	0.307676	10.2246	2.59049	0.019809	0.775433	1
ENSG00000078237	TIGAR	TIGAR_HUMAN	Q9NQ88	A_23_P128486	0.296037	11.3538	2.58895	0.019871	0.775433	1
ENSG00000093134	VNN3	VNN3_HUMAN	Q9NY84	A_23_P214935	0.23903	6.82077	2.58895	0.0198711	0.775433	1
ENSG00000128585	MKLN1	MKLN1_HUMAN	Q9UL63	A_23_P93613	0.325814	10.2779	2.58883	0.0198759	0.775433	1
ENSG00000185130	HIST1H2BL	H2B1L_HUMAN	Q99880	A_23_P402081	-0.301628	11.6102	-2.58816	0.0199027	0.775433	1
ENSG00000233822	HIST1H2BN	H2B1N_HUMAN	Q99877	A_23_P402081	-0.301628	11.6102	-2.58816	0.0199027	0.775433	1
ENSG00000182372	CLN8	CLN8_HUMAN	Q9UBY8	A_23_P407206	0.402443	8.76378	2.58809	0.0199054	0.775433	1
ENSG00000205897	-	-	-	A_32_P352358	-0.298177	7.31755	-2.58787	0.0199145	0.775433	1
ENSG00000238228	-	-	-	A_32_P352358	-0.298177	7.31755	-2.58787	0.0199145	0.775433	1
ENSG00000238152	-	-	-	A_32_P352358	-0.298177	7.31755	-2.58787	0.0199145	0.775433	1
ENSG00000255554	-	-	-	A_32_P352358	-0.298177	7.31755	-2.58787	0.0199145	0.775433	1
ENSG00000235855	-	-	-	A_32_P352358	-0.298177	7.31755	-2.58787	0.0199145	0.775433	1
ENSG00000177586	-	-	-	A_32_P352358	-0.298177	7.31755	-2.58787	0.0199145	0.775433	1
ENSG00000177306	-	-	-	A_32_P352358	-0.298177	7.31755	-2.58787	0.0199145	0.775433	1
ENSG00000251166	-	-	-	A_32_P352358	-0.298177	7.31755	-2.58787	0.0199145	0.775433	1
ENSG00000233176	-	-	-	A_32_P352358	-0.298177	7.31755	-2.58787	0.0199145	0.775433	1
ENSG00000254817	-	-	-	A_32_P352358	-0.298177	7.31755	-2.58787	0.0199145	0.775433	1
ENSG00000227013	-	-	-	A_32_P352358	-0.298177	7.31755	-2.58787	0.0199145	0.775433	1
ENSG00000254715	-	-	-	A_32_P352358	-0.298177	7.31755	-2.58787	0.0199145	0.775433	1
ENSG00000250710	-	-	-	A_32_P352358	-0.298177	7.31755	-2.58787	0.0199145	0.775433	1
ENSG00000094916	CBX5	CBX5_HUMAN	P45973	A_23_P2355	-0.358422	11.0049	-2.58781	0.0199167	0.775433	1
ENSG00000012124	CD22	CD22_HUMAN	P20273	A_24_P254106	0.262193	6.96537	2.58674	0.0199601	0.775433	1
ENSG00000177427	MIEF2	MID49_HUMAN	Q96C03	A_23_P501372	-0.261646	10.3554	-2.58608	0.0199868	0.775433	1
ENSG00000189238	-	-	-	A_32_P62276	-0.410706	6.95475	-2.58358	0.020088	0.775433	1
ENSG00000087053	MTMR2	MTMR2_HUMAN	Q13614	A_23_P64019	0.266773	10.2489	2.58353	0.0200903	0.775433	1
ENSG00000128710	HOXD10	HXD10_HUMAN	P28358	A_23_P381368	-0.255448	6.9213	-2.58307	0.0201088	0.775433	1
ENSG00000074803	SLC12A1	S12A1_HUMAN	Q13621	A_24_P911132	0.431144	6.92468	2.58288	0.0201166	0.775433	1
ENSG00000229570	-	-	-	A_24_P483871	0.349316	7.41116	2.58262	0.0201274	0.775433	1
ENSG00000133256	PDE6B	PDE6B_HUMAN	P35913	A_23_P22143	-0.299488	9.77526	-2.58164	0.0201673	0.775433	1
ENSG00000131779	PEX11B	PX11B_HUMAN	O96011	A_24_P88554	0.233728	9.58376	2.5816	0.0201686	0.775433	1
ENSG00000261441	-	-	-	A_32_P129340	0.44844	7.2291	2.5811	0.0201893	0.775433	1
ENSG00000167208	SNX20	SNX20_HUMAN	Q7Z614	A_23_P352469	0.310285	8.20122	2.58107	0.0201904	0.775433	1
ENSG00000106460	TMEM106B	T106B_HUMAN	Q9NUM4	A_23_P8522	0.274444	10.0575	2.58023	0.0202246	0.775433	1
ENSG00000185056	C5orf47	CE047_HUMAN	Q569G3	A_32_P178855	0.270999	6.97831	2.57982	0.0202415	0.775433	1
ENSG00000214434	-	-	-	A_24_P711050	0.292923	9.88839	2.57955	0.0202524	0.775433	1
ENSG00000168291	PDHB	ODPB_HUMAN	P11177	A_23_P20932	0.312444	13.4331	2.57847	0.0202967	0.775433	1
ENSG00000112183	RBM24	RBM24_HUMAN	Q9BX46	A_23_P167812	0.350044	8.91755	2.57831	0.0203032	0.775433	1
ENSG00000179583	CIITA	C2TA_HUMAN	P33076	A_23_P353478	0.395659	8.18099	2.57796	0.0203177	0.775433	1
ENSG00000233276	GPX1	GPX1_HUMAN	P07203	A_23_P250671	0.238425	16.4282	2.5775	0.0203368	0.775433	1
ENSG00000008056	SYN1	SYN1_HUMAN	P17600	A_23_P33847	-0.269572	7.57108	-2.57704	0.0203555	0.775433	1
ENSG00000153531	ADPRHL1	ARHL1_HUMAN	Q8NDY3	A_23_P48438	0.359211	8.22727	2.57695	0.0203594	0.775433	1
ENSG00000268129	-	-	-	A_32_P209791	-0.30916	10.4041	-2.57676	0.020367	0.775433	1
ENSG00000125872	LRRN4	LRRN4_HUMAN	Q8WUT4	A_23_P351913	0.430976	7.46484	2.57612	0.0203934	0.775433	1
ENSG00000129473	BCL2L2	B2CL2_HUMAN	Q92843	A_23_P418373	-0.317678	10.7131	-2.57511	0.0204354	0.775433	1
ENSG00000151834	GABRA2	GBRA2_HUMAN	P47869	A_23_P212869	-0.394359	7.03824	-2.57504	0.0204382	0.775433	1
ENSG00000105472	CLEC11A	-	-	A_23_P153489	-0.267685	9.1568	-2.57448	0.0204612	0.775433	1
ENSG00000101126	ADNP	ADNP_HUMAN	Q9H2P0	A_23_P254179	0.301481	11.8558	2.57403	0.0204799	0.775433	1
ENSG00000181773	GPR3	GPR3_HUMAN	P46089	A_23_P348808	0.273491	7.29582	2.57282	0.0205299	0.775433	1
ENSG00000147684	NDUFB9	NDUB9_HUMAN	Q9Y6M9	A_24_P154006	-0.290162	15.8763	-2.57268	0.020536	0.775433	1
ENSG00000157600	RP13-360B22.2	TM164_HUMAN	Q5U3C3	A_23_P96041	-0.277866	11.102	-2.57118	0.0205983	0.775433	1
ENSG00000157600	TMEM164	TM164_HUMAN	Q5U3C3	A_23_P96041	-0.277866	11.102	-2.57118	0.0205983	0.775433	1
ENSG00000184139	-	-	-	A_32_P74357	0.271397	13.0772	2.57098	0.0206067	0.775433	1
ENSG00000177946	CENPBD1	CENP1_HUMAN	B2RD01	A_23_P343843	-0.309993	9.51642	-2.56984	0.0206542	0.775433	1
ENSG00000196422	PPP1R26	PPR26_HUMAN	Q5T8A7	A_23_P146497	-0.346733	11.4967	-2.56957	0.0206652	0.775433	1
ENSG00000149043	SYT8	SYT8_HUMAN	Q8NBV8	A_23_P36187	-0.307209	7.05589	-2.5691	0.0206848	0.775433	1
ENSG00000102471	NDFIP2	NFIP2_HUMAN	Q9NV92	A_32_P196072	0.259999	9.99579	2.56904	0.0206875	0.775433	1
ENSG00000188219	POTEE	POTEE_HUMAN	Q6S8J3	A_24_P59220	-0.291811	15.2526	-2.56903	0.0206877	0.775433	1
ENSG00000222038	POTEJ	POTEJ_HUMAN	P0CG39	A_24_P59220	-0.291811	15.2526	-2.56903	0.0206877	0.775433	1
ENSG00000196604	POTEF	POTEF_HUMAN	A5A3E0	A_24_P59220	-0.291811	15.2526	-2.56903	0.0206877	0.775433	1
ENSG00000196834	POTEI	POTEI_HUMAN	P0CG38	A_24_P59220	-0.291811	15.2526	-2.56903	0.0206877	0.775433	1
ENSG00000132823	OSER1	OSER1_HUMAN	Q9NX31	A_23_P79818	0.290231	11.2499	2.56885	0.0206953	0.775433	1
ENSG00000261697	-	-	-	A_24_P618476	-0.278366	6.98654	-2.56871	0.0207012	0.775433	1
ENSG00000113356	POLR3G	RPC7_HUMAN	O15318	A_23_P41942	-0.396567	9.37924	-2.56754	0.02075	0.775433	1
ENSG00000116017	ARID3A	ARI3A_HUMAN	Q99856	A_23_P16516	-0.25386	11.93	-2.56717	0.0207657	0.775433	1
ENSG00000006607	FARP2	FARP2_HUMAN	O94887	A_24_P59485	-0.254902	8.10845	-2.56714	0.0207671	0.775433	1
ENSG00000184254	ALDH1A3	AL1A3_HUMAN	P47895	A_23_P205959	0.340605	10.6785	2.56509	0.0208531	0.775433	1
ENSG00000221900	POM121L12	P1L12_HUMAN	Q8N7R1	A_32_P56766	-0.265717	7.03861	-2.5644	0.0208824	0.775433	1
ENSG00000205181	-	-	-	A_32_P174156	0.28046	7.06979	2.56364	0.0209143	0.775433	1
ENSG00000072401	UBE2D1	UB2D1_HUMAN	P51668	A_24_P13032	0.302299	10.3368	2.56318	0.0209339	0.775433	1
ENSG00000127418	FGFRL1	FGRL1_HUMAN	Q8N441	A_23_P92349	-0.395602	11.9302	-2.56315	0.0209349	0.775433	1
ENSG00000101444	AHCY	SAHH_HUMAN	P23526	A_24_P57367	-0.289551	12.2809	-2.56249	0.0209629	0.775433	1
ENSG00000151388	ADAMTS12	ATS12_HUMAN	P58397	A_23_P44648	-0.320586	7.6546	-2.5622	0.0209754	0.775433	1
ENSG00000185803	SLC52A2	S52A2_HUMAN	Q9HAB3	A_23_P258281	-0.278122	12.9972	-2.5619	0.0209878	0.775433	1
ENSG00000074966	TXK	TXK_HUMAN	P42681	A_24_P921122	-0.341521	7.07354	-2.56156	0.0210024	0.775433	1
ENSG00000076258	FMO4	FMO4_HUMAN	P31512	A_24_P28562	0.278903	7.23982	2.56138	0.02101	0.775433	1
ENSG00000070018	LRP6	LRP6_HUMAN	O75581	A_23_P150827	-0.360274	10.7935	-2.55996	0.0210702	0.775433	1
ENSG00000204257	HLA-DMA	DMA_HUMAN	P28067	A_23_P42306	-0.281136	8.91672	-2.55994	0.0210713	0.775433	1
ENSG00000111671	SPSB2	SPSB2_HUMAN	Q99619	A_23_P151098	-0.233372	11.0345	-2.5599	0.0210727	0.775433	1
ENSG00000113282	CLINT1	EPN4_HUMAN	Q14677	A_23_P133345	-0.343369	11.1498	-2.55808	0.0211507	0.775433	1
ENSG00000151292	CSNK1G3	KC1G3_HUMAN	Q9Y6M4	A_24_P234792	0.281763	9.76775	2.55694	0.021199	0.775433	1
ENSG00000137074	APTX	APTX_HUMAN	Q7Z2E3	A_24_P913835	-0.325509	7.40311	-2.55556	0.0212585	0.775433	1
ENSG00000236184	-	-	-	A_24_P913835	-0.325509	7.40311	-2.55556	0.0212585	0.775433	1
ENSG00000013306	SLC25A39	S2539_HUMAN	Q9BZJ4	A_23_P100764	-0.332992	13.1128	-2.55275	0.0213793	0.775433	1
ENSG00000004142	POLDIP2	PDIP2_HUMAN	Q9Y2S7	A_24_P142442	-0.25356	12.7626	-2.55258	0.0213864	0.775433	1
ENSG00000272583	-	-	-	A_32_P33294	0.407072	11.0014	2.55242	0.0213935	0.775433	1
ENSG00000273802	HIST1H2BC	H2B1C_HUMAN	P62807	A_23_P167997	-0.32194	10.0405	-2.55218	0.0214039	0.775433	1
ENSG00000273802	HIST1H2BE	H2B1C_HUMAN	P62807	A_23_P167997	-0.32194	10.0405	-2.55218	0.0214039	0.775433	1
ENSG00000273802	HIST1H2BF	H2B1C_HUMAN	P62807	A_23_P167997	-0.32194	10.0405	-2.55218	0.0214039	0.775433	1
ENSG00000273802	HIST1H2BG	H2B1C_HUMAN	P62807	A_23_P167997	-0.32194	10.0405	-2.55218	0.0214039	0.775433	1
ENSG00000273802	HIST1H2BI	H2B1C_HUMAN	P62807	A_23_P167997	-0.32194	10.0405	-2.55218	0.0214039	0.775433	1
ENSG00000215022	-	-	-	A_24_P359067	-0.336687	7.16836	-2.55206	0.021409	0.775433	1
ENSG00000168528	SERINC2	SERC2_HUMAN	Q96SA4	A_23_P147326	-0.279671	9.4938	-2.55191	0.0214153	0.775433	1
ENSG00000265203	RBP3	RET3_HUMAN	P10745	A_23_P324890	-0.397537	6.8957	-2.55074	0.0214662	0.775433	1
ENSG00000153786	ZDHHC7	ZDHC7_HUMAN	Q9NXF8	A_23_P129389	-0.240421	11.783	-2.54976	0.0215085	0.775433	1
ENSG00000184752	NDUFA12	NDUAC_HUMAN	Q9UI09	A_23_P76557	-0.275604	12.8524	-2.54902	0.0215406	0.775433	1
ENSG00000130023	ERMARD	EMARD_HUMAN	Q5T6L9	A_32_P129527	0.265373	8.91572	2.54901	0.0215409	0.775433	1
ENSG00000097007	ABL1	ABL1_HUMAN	P00519	A_23_P60180	-0.259775	11.2346	-2.54896	0.0215433	0.775433	1
ENSG00000197766	CFD	CFAD_HUMAN	P00746	A_23_P119562	0.290973	10.0791	2.54894	0.0215443	0.775433	1
ENSG00000105778	AVL9	AVL9_HUMAN	Q8NBF6	A_23_P122947	-0.26485	8.8446	-2.54614	0.0216661	0.775433	1
ENSG00000215305	VPS16	VPS16_HUMAN	Q9H269	A_23_P143303	-0.292324	10.4908	-2.5456	0.0216897	0.775433	1
ENSG00000176654	-	-	-	A_24_P68068	0.30097	8.05915	2.54548	0.0216952	0.775433	1
ENSG00000203870	SMIM9	SMIM9_HUMAN	A6NGZ8	A_24_P558750	0.305699	7.16257	2.54499	0.0217164	0.775433	1
ENSG00000272767	-	-	-	A_23_P86434	0.341537	9.68111	2.54397	0.021761	0.775433	1
ENSG00000135637	CCDC142	CC142_HUMAN	Q17RM4	A_23_P102258	0.241634	13.0334	2.54378	0.0217693	0.775433	1
ENSG00000204822	MRPL53	RM53_HUMAN	Q96EL3	A_23_P102258	0.241634	13.0334	2.54378	0.0217693	0.775433	1
ENSG00000122121	XPNPEP2	XPP2_HUMAN	O43895	A_23_P83659	0.278069	7.16569	2.5429	0.021808	0.775433	1
ENSG00000213523	SRA1	SRA1_HUMAN	Q9HD15	A_23_P110445	-0.357055	9.88111	-2.54244	0.0218283	0.775433	1
ENSG00000113108	APBB3	APBB3_HUMAN	O95704	A_23_P110445	-0.357055	9.88111	-2.54244	0.0218283	0.775433	1
ENSG00000101363	MANBAL	MANBL_HUMAN	Q9NQG1	A_23_P131778	-0.245763	11.9345	-2.54238	0.0218308	0.775433	1
ENSG00000155093	PTPRN2	PTPR2_HUMAN	Q92932	A_32_P79434	0.347624	7.16267	2.54233	0.021833	0.775433	1
ENSG00000155903	RASA2	RASA2_HUMAN	Q15283	A_23_P91964	-0.251084	8.3625	-2.54232	0.0218337	0.775433	1
ENSG00000161381	PLXDC1	PLDX1_HUMAN	Q8IUK5	A_32_P208823	-0.329884	7.02191	-2.54149	0.0218704	0.775433	1
ENSG00000117632	STMN1	STMN1_HUMAN	P16949	A_24_P342511	0.282834	7.134	2.54137	0.0218756	0.775433	1
ENSG00000169213	RAB3B	RAB3B_HUMAN	P20337	A_24_P933319	0.273671	12.4364	2.54127	0.0218799	0.775433	1
ENSG00000184697	CLDN6	CLD6_HUMAN	P56747	A_23_P37942	-0.331029	13.4701	-2.54048	0.0219146	0.775433	1
ENSG00000177398	UMODL1	UROL1_HUMAN	Q5DID0	A_23_P315964	0.287027	7.09535	2.54017	0.0219282	0.775433	1
ENSG00000074621	SLC24A1	NCKX1_HUMAN	O60721	A_24_P401921	0.25845	7.21868	2.53996	0.0219376	0.775433	1
ENSG00000175229	GAL3ST3	G3ST3_HUMAN	Q96A11	A_23_P35830	-0.267821	7.47472	-2.53945	0.0219602	0.775433	1
ENSG00000182183	FAM159A	F159A_HUMAN	Q6UWV7	A_24_P160491	-0.268114	7.09341	-2.53928	0.021968	0.775433	1
ENSG00000206178	-	-	-	A_23_P3651	-0.268337	7.23571	-2.53862	0.0219971	0.775433	1
ENSG00000130656	HBZ	HBAZ_HUMAN	P02008	A_23_P3651	-0.268337	7.23571	-2.53862	0.0219971	0.775433	1
ENSG00000169905	TOR1AIP2	IFG15_HUMAN	Q9H496	A_24_P839239	0.302604	10.5028	2.53803	0.022023	0.775433	1
ENSG00000169905	TOR1AIP2	TOIP2_HUMAN	Q8NFQ8	A_24_P839239	0.302604	10.5028	2.53803	0.022023	0.775433	1
ENSG00000159479	MED8	MED8_HUMAN	Q96G25	A_24_P233915	0.286125	8.98542	2.53721	0.0220594	0.775433	1
ENSG00000227802	-	-	-	A_32_P2362	-0.299513	7.0422	-2.5372	0.0220599	0.775433	1
ENSG00000168806	LCMT2	TYW4_HUMAN	O60294	A_23_P106505	0.308028	10.4882	2.53517	0.0221505	0.775433	1
ENSG00000164253	WDR41	WDR41_HUMAN	Q9HAD4	A_23_P259521	0.271674	10.317	2.53456	0.0221775	0.775433	1
ENSG00000167880	EVPL	EVPL_HUMAN	Q92817	A_24_P104512	0.292934	9.55769	2.53416	0.0221957	0.775433	1
ENSG00000196872	KIAA1211L	K121L_HUMAN	Q6NV74	A_32_P203959	0.328869	13.0741	2.53372	0.0222151	0.775433	1
ENSG00000107758	PPP3CB	PP2BB_HUMAN	P16298	A_24_P98524	-0.252563	11.1759	-2.53304	0.0222458	0.775433	1
ENSG00000101327	PDYN	PDYN_HUMAN	P01213	A_24_P279870	-0.363734	7.05148	-2.53275	0.0222586	0.775433	1
ENSG00000248144	ADH1C	ADH1G_HUMAN	P00326	A_23_P81158	-0.295812	7.21791	-2.53241	0.0222739	0.775433	1
ENSG00000115762	PLEKHB2	PKHB2_HUMAN	Q96CS7	A_23_P28638	-0.274377	11.3196	-2.53126	0.0223255	0.775433	1
ENSG00000161542	PRPSAP1	KPRA_HUMAN	Q14558	A_23_P15305	0.28163	11.4411	2.53119	0.0223287	0.775433	1
ENSG00000225121	-	-	-	A_24_P58034	0.256895	7.49513	2.53099	0.0223378	0.775433	1
ENSG00000185168	-	-	-	A_24_P323084	0.264651	7.51205	2.52817	0.0224647	0.775433	1
ENSG00000108829	LRRC59	LRC59_HUMAN	Q96AG4	A_24_P181585	0.327799	12.2946	2.52816	0.0224653	0.775433	1
ENSG00000150676	CCDC83	CCD83_HUMAN	Q8IWF9	A_23_P356667	0.33321	6.94024	2.52796	0.0224745	0.775433	1
ENSG00000212932	-	-	-	A_23_P256059	0.312197	13.982	2.52731	0.0225037	0.775433	1
ENSG00000213753	-	-	-	A_23_P256059	0.312197	13.982	2.52731	0.0225037	0.775433	1
ENSG00000233084	-	-	-	A_23_P256059	0.312197	13.982	2.52731	0.0225037	0.775433	1
ENSG00000260615	-	-	-	A_23_P256059	0.312197	13.982	2.52731	0.0225037	0.775433	1
ENSG00000243422	-	-	-	A_23_P256059	0.312197	13.982	2.52731	0.0225037	0.775433	1
ENSG00000240356	-	-	-	A_23_P256059	0.312197	13.982	2.52731	0.0225037	0.775433	1
ENSG00000228463	-	-	-	A_23_P256059	0.312197	13.982	2.52731	0.0225037	0.775433	1
ENSG00000241670	-	-	-	A_23_P256059	0.312197	13.982	2.52731	0.0225037	0.775433	1
ENSG00000184319	-	-	-	A_23_P256059	0.312197	13.982	2.52731	0.0225037	0.775433	1
ENSG00000232938	-	-	-	A_23_P256059	0.312197	13.982	2.52731	0.0225037	0.775433	1
ENSG00000111907	TPD52L1	TPD53_HUMAN	Q16890	A_23_P31143	-0.363736	10.413	-2.52713	0.0225121	0.775433	1
ENSG00000179364	PACS2	PACS2_HUMAN	Q86VP3	A_24_P393372	0.246505	8.70438	2.52695	0.0225202	0.775433	1
ENSG00000145198	VWA5B2	VW5B2_HUMAN	Q8N398	A_24_P152881	0.267891	8.21697	2.52673	0.0225301	0.775433	1
ENSG00000171497	PPID	PPID_HUMAN	Q08752	A_23_P386411	0.280976	11.3705	2.52668	0.0225324	0.775433	1
ENSG00000006695	COX10	COX10_HUMAN	Q12887	A_23_P55123	-0.277745	8.33805	-2.52655	0.022538	0.775433	1
ENSG00000101951	PAGE4	PAGE4_HUMAN	O60829	A_24_P254506	0.271044	7.33639	2.52655	0.0225381	0.775433	1
ENSG00000257379	-	-	-	A_24_P349466	0.252584	8.97346	2.52649	0.0225411	0.775433	1
ENSG00000205352	PRR13	PRR13_HUMAN	Q9NZ81	A_24_P349466	0.252584	8.97346	2.52649	0.0225411	0.775433	1
ENSG00000187534	-	-	-	A_24_P349466	0.252584	8.97346	2.52649	0.0225411	0.775433	1
ENSG00000213201	-	-	-	A_24_P272515	0.255573	9.98062	2.52602	0.022562	0.775433	1
ENSG00000178038	ALS2CL	AL2CL_HUMAN	Q60I27	A_23_P416705	0.263461	7.51537	2.52534	0.0225932	0.775433	1
ENSG00000198680	TUSC1	TUSC1_HUMAN	Q2TAM9	A_23_P373819	0.245841	9.53527	2.52447	0.0226329	0.775433	1
ENSG00000152669	CCNO	CCNO_HUMAN	P22674	A_24_P246397	-0.255258	7.25686	-2.5243	0.0226407	0.775433	1
ENSG00000102524	TNFSF13B	TN13B_HUMAN	Q9Y275	A_23_P14174	0.307593	7.26439	2.52325	0.0226883	0.775433	1
ENSG00000105048	TNNT1	TNNT1_HUMAN	P13805	A_23_P56050	-0.319162	13.5517	-2.52057	0.022811	0.775433	1
ENSG00000203808	-	-	-	A_24_P701030	-0.241658	7.04037	-2.5202	0.0228279	0.775433	1
ENSG00000122852	SFTPA1	SFTA1_HUMAN	Q8IWL2	A_24_P928658	-0.257888	7.2005	-2.52016	0.02283	0.775433	1
ENSG00000143603	KCNN3	KCNN3_HUMAN	Q9UGI6	A_23_P126167	0.305037	7.19961	2.51885	0.02289	0.775433	1
ENSG00000149599	DUSP15	DUS15_HUMAN	Q9H1R2	A_23_P369090	-0.356075	6.92427	-2.5188	0.0228922	0.775433	1
ENSG00000254553	-	-	-	A_23_P352365	-0.382348	11.0788	-2.51834	0.0229135	0.775433	1
ENSG00000160062	ZBTB8A	ZBT8A_HUMAN	Q96BR9	A_23_P352365	-0.382348	11.0788	-2.51834	0.0229135	0.775433	1
ENSG00000183454	GRIN2A	NMDE1_HUMAN	Q12879	A_24_P381844	-0.348738	7.00639	-2.51767	0.0229442	0.775433	1
ENSG00000179813	FAM216B	F216B_HUMAN	Q8N7L0	A_32_P192667	0.355607	6.91877	2.51752	0.0229514	0.775433	1
ENSG00000105085	MED26	MED26_HUMAN	O95402	A_23_P164737	0.23617	10.8869	2.51701	0.0229751	0.775433	1
ENSG00000182185	RAD51B	RA51B_HUMAN	O15315	A_32_P517715	-0.348535	7.04578	-2.51691	0.0229796	0.775433	1
ENSG00000164879	CA3	CAH3_HUMAN	P07451	A_23_P20316	-0.264263	7.2117	-2.51638	0.0230042	0.775433	1
ENSG00000047410	TPR	TPR_HUMAN	P12270	A_24_P179611	-0.331707	12.2372	-2.51545	0.0230469	0.775433	1
ENSG00000047410	Tpr	TPR_HUMAN	P12270	A_24_P179611	-0.331707	12.2372	-2.51545	0.0230469	0.775433	1
ENSG00000135870	RC3H1	RC3H1_HUMAN	Q5TC82	A_23_P103334	-0.396278	9.64551	-2.51495	0.0230703	0.775433	1
ENSG00000117751	PPP1R8	PP1R8_HUMAN	Q12972	A_24_P139773	-0.363903	9.83252	-2.51479	0.0230775	0.775433	1
ENSG00000237943	-	-	-	A_32_P232559	-0.277161	12.2659	-2.5146	0.0230864	0.775433	1
ENSG00000216863	-	-	-	A_23_P373642	-0.235433	6.97075	-2.51401	0.0231138	0.775433	1
ENSG00000121454	LHX4	LHX4_HUMAN	Q969G2	A_23_P23869	0.328338	7.06507	2.51376	0.0231255	0.775433	1
ENSG00000167283	ATP5L	ATP5L_HUMAN	O75964	A_23_P75622	-0.319993	16.5253	-2.51341	0.0231416	0.775433	1
ENSG00000263013	-	-	-	A_32_P30630	0.317245	7.02156	2.51289	0.0231659	0.775433	1
ENSG00000237372	-	-	-	A_32_P132860	-0.262867	7.3502	-2.51245	0.0231866	0.775433	1
ENSG00000172936	MYD88	MYD88_HUMAN	Q99836	A_23_P362659	-0.282656	10.1211	-2.5118	0.0232166	0.775433	1
ENSG00000160294	MCM3AP	GANP_HUMAN	O60318	A_23_P120744	-0.327235	11.075	-2.5117	0.0232215	0.775433	1
ENSG00000165637	VDAC2	VDAC2_HUMAN	P45880	A_23_P75268	0.260291	14.7916	2.51131	0.0232398	0.775433	1
ENSG00000228196	-	-	-	A_32_P1445	-0.309256	9.85143	-2.51008	0.023297	0.775433	1
ENSG00000214121	-	-	-	A_24_P680548	0.269359	14.2637	2.50984	0.0233081	0.775433	1
ENSG00000138193	PLCE1	PLCE1_HUMAN	Q9P212	A_23_P35617	0.389342	11.4215	2.50943	0.0233274	0.775433	1
ENSG00000104213	PDGFRL	PGFRL_HUMAN	Q15198	A_23_P60146	0.237378	9.09187	2.50921	0.023338	0.775433	1
ENSG00000187147	RNF220	RN220_HUMAN	Q5VTB9	A_23_P201002	-0.24869	13.393	-2.50862	0.0233657	0.775433	1
ENSG00000182870	GALNT9	GALT9_HUMAN	Q9HCQ5	A_23_P252462	0.295115	7.0265	2.50837	0.0233771	0.775433	1
ENSG00000166123	GPT2	ALAT2_HUMAN	Q8TD30	A_24_P193648	-0.313734	10.4233	-2.50776	0.0234058	0.775433	1
ENSG00000072849	DERL2	DERL2_HUMAN	Q9GZP9	A_23_P118749	0.252213	11.8601	2.50775	0.0234062	0.775433	1
ENSG00000114999	TTL	TTL_HUMAN	Q8NG68	A_23_P361482	-0.227327	8.00247	-2.50746	0.0234202	0.775433	1
ENSG00000156096	UGT2B4	UD2B4_HUMAN	P06133	A_23_P386912	-0.483908	7.05038	-2.50723	0.0234307	0.775433	1
ENSG00000185236	RAB11B	RB11B_HUMAN	Q15907	A_23_P67748	-0.322513	8.66207	-2.50644	0.0234682	0.775433	1
ENSG00000124333	VAMP7	VAMP7_HUMAN	P51809	A_23_P22671	0.256736	10.9425	2.50614	0.0234823	0.775433	1
ENSG00000276045	ORAI1	CRCM1_HUMAN	Q96D31	A_24_P146892	-0.276384	10.5794	-2.50583	0.0234971	0.775433	1
ENSG00000145687	SSBP2	SSBP2_HUMAN	P81877	A_23_P33791	-0.392977	8.76762	-2.50533	0.0235206	0.775433	1
ENSG00000101367	MAPRE1	MARE1_HUMAN	Q15691	A_24_P220058	0.279967	12.6072	2.50518	0.0235276	0.775433	1
ENSG00000161010	C5orf45	CE045_HUMAN	Q6NTE8	A_24_P363087	-0.392471	11.0783	-2.50455	0.0235572	0.775433	1
ENSG00000112981	NME5	NDK5_HUMAN	P56597	A_23_P156402	0.251422	8.39823	2.50453	0.0235582	0.775433	1
ENSG00000008952	SEC62	SEC62_HUMAN	Q99442	A_23_P357860	0.304098	7.27598	2.50442	0.0235635	0.775433	1
ENSG00000182400	TRAPPC6B	TPC6B_HUMAN	Q86SZ2	A_24_P304581	0.253666	8.48171	2.50351	0.0236067	0.775433	1
ENSG00000105835	NAMPT	NAMPT_HUMAN	P43490	A_24_P408772	-0.255099	10.5838	-2.5035	0.023607	0.775433	1
ENSG00000229644	-	-	-	A_24_P408772	-0.255099	10.5838	-2.5035	0.023607	0.775433	1
ENSG00000154839	SKA1	SKA1_HUMAN	Q96BD8	A_24_P322354	-0.293102	9.8168	-2.50252	0.0236536	0.775433	1
ENSG00000125304	TM9SF2	TM9S2_HUMAN	Q99805	A_23_P151394	0.237404	12.2086	2.5023	0.0236641	0.775433	1
ENSG00000137642	SORL1	SORL_HUMAN	Q92673	A_23_P87049	-0.419072	12.179	-2.50222	0.0236679	0.775433	1
ENSG00000205309	NT5M	NT5M_HUMAN	Q9NPB1	A_23_P3946	-0.28843	8.29675	-2.50217	0.0236702	0.775433	1
ENSG00000176753	C15orf56	CO056_HUMAN	Q8N910	A_32_P189211	0.290398	6.96521	2.50215	0.0236711	0.775433	1
ENSG00000140598	EFTUD1	ETUD1_HUMAN	Q7Z2Z2	A_24_P754817	-0.253339	7.71136	-2.50213	0.0236722	0.775433	1
ENSG00000259404	-	-	-	A_24_P754817	-0.253339	7.71136	-2.50213	0.0236722	0.775433	1
ENSG00000141448	GATA6	GATA6_HUMAN	Q92908	A_23_P304450	0.401255	13.5739	2.50189	0.0236837	0.775433	1
ENSG00000246022	-	-	-	A_32_P222225	0.368416	6.94432	2.50172	0.0236915	0.775433	1
ENSG00000166734	CASC4	CASC4_HUMAN	Q6P4E1	A_24_P398940	0.242205	10.4462	2.50096	0.023728	0.775433	1
ENSG00000102109	PCSK1N	PCSK1_HUMAN	Q9UHG2	A_24_P14731	0.418714	11.4111	2.50056	0.0237469	0.775433	1
ENSG00000205502	C2CD4B	C2C4B_HUMAN	A6NLJ0	A_24_P564576	0.375407	8.15995	2.49956	0.0237946	0.775433	1
ENSG00000158106	RHPN1	RHPN1_HUMAN	Q8TCX5	A_23_P87435	-0.261134	7.30702	-2.49944	0.0238004	0.775433	1
ENSG00000132334	PTPRE	PTPRE_HUMAN	P23469	A_24_P213494	0.2952	7.19193	2.49851	0.0238448	0.775433	1
ENSG00000196268	ZNF493	ZN493_HUMAN	Q6ZR52	A_24_P49775	-0.340096	10.9327	-2.49847	0.0238468	0.775433	1
ENSG00000172687	ZNF738	ZN738_HUMAN	Q8NE65	A_24_P49775	-0.340096	10.9327	-2.49847	0.0238468	0.775433	1
ENSG00000187268	FAM9C	FAM9C_HUMAN	Q8IZT9	A_23_P385790	0.351161	7.07521	2.49828	0.0238557	0.775433	1
ENSG00000144959	NCEH1	NCEH1_HUMAN	Q6PIU2	A_23_P132644	-0.550452	8.72265	-2.49767	0.0238847	0.775433	1
ENSG00000174238	PITPNA	PIPNA_HUMAN	Q00169	A_24_P942354	0.246825	11.9001	2.49744	0.0238961	0.775433	1
ENSG00000138311	ZNF365	TALAN_HUMAN	Q70YC4	A_23_P86610	-0.28369	7.17039	-2.49728	0.0239036	0.775433	1
ENSG00000138311	ZNF365	ZN365_HUMAN	Q70YC5	A_23_P86610	-0.28369	7.17039	-2.49728	0.0239036	0.775433	1
ENSG00000107614	DKFZp686N1286	TRDMT_HUMAN	O14717	A_32_P21579	-0.274969	7.21179	-2.49631	0.0239502	0.775433	1
ENSG00000107614	TRDMT1	TRDMT_HUMAN	O14717	A_32_P21579	-0.274969	7.21179	-2.49631	0.0239502	0.775433	1
ENSG00000138802	SEC24B	SC24B_HUMAN	O95487	A_23_P69683	0.320566	9.7025	2.49618	0.0239563	0.775433	1
ENSG00000253729	PRKDC	PRKDC_HUMAN	P78527	A_32_P25204	-0.302168	9.17923	-2.49611	0.02396	0.775433	1
ENSG00000134202	GSTM3	GSTM3_HUMAN	P21266	A_24_P914434	0.213518	7.8576	2.4959	0.0239698	0.775433	1
ENSG00000259489	-	-	-	A_24_P332595	0.410172	8.55988	2.49585	0.0239724	0.775433	1
ENSG00000126351	THRA	THA_HUMAN	P10827	A_23_P207742	-0.367004	10.0372	-2.49539	0.0239944	0.775433	1
ENSG00000150961	SEC24D	SC24D_HUMAN	O94855	A_23_P159382	0.35262	10.095	2.49498	0.0240142	0.775433	1
ENSG00000111897	SERINC1	SERC1_HUMAN	Q9NRX5	A_24_P129232	0.293741	11.4569	2.49494	0.0240161	0.775433	1
ENSG00000181143	MUC16	-	-	A_23_P5211	-0.264682	7.08239	-2.49471	0.0240274	0.775433	1
ENSG00000169926	KLF13	KLF13_HUMAN	Q9Y2Y9	A_32_P197489	-0.339372	11.4348	-2.49469	0.0240284	0.775433	1
ENSG00000178409	BEND3	BEND3_HUMAN	Q5T5X7	A_23_P359854	0.306469	11.0494	2.49402	0.0240608	0.775433	1
ENSG00000240371	-	-	-	A_24_P418189	0.273178	12.6052	2.49393	0.0240649	0.775433	1
ENSG00000175509	-	-	-	A_23_P40734	0.275124	7.32407	2.49389	0.0240667	0.775433	1
ENSG00000100312	ACR	ACRO_HUMAN	P10323	A_23_P40734	0.275124	7.32407	2.49389	0.0240667	0.775433	1
ENSG00000143013	LMO4	LMO4_HUMAN	P61968	A_23_P380181	-0.341745	11.1259	-2.49369	0.0240763	0.775433	1
ENSG00000257524	-	-	-	A_23_P217088	-0.253717	10.212	-2.49369	0.0240767	0.775433	1
ENSG00000106992	AK1	KAD1_HUMAN	P00568	A_23_P217088	-0.253717	10.212	-2.49369	0.0240767	0.775433	1
ENSG00000278023	RDM1	RDM1_HUMAN	Q8NG50	A_23_P141447	-0.237593	8.75786	-2.49363	0.0240792	0.775433	1
ENSG00000267708	-	-	-	A_23_P141447	-0.237593	8.75786	-2.49363	0.0240792	0.775433	1
ENSG00000260971	-	-	-	A_24_P248038	0.301356	7.06856	2.49249	0.0241346	0.775433	1
ENSG00000172888	ZNF621	ZN621_HUMAN	Q6ZSS3	A_24_P340800	-0.348885	7.52443	-2.49055	0.0242283	0.775433	1
ENSG00000197409	HIST1H3A	H31_HUMAN	P68431	A_23_P219045	-0.384953	12.9878	-2.49046	0.0242327	0.775433	1
ENSG00000197409	HIST1H3B	H31_HUMAN	P68431	A_23_P219045	-0.384953	12.9878	-2.49046	0.0242327	0.775433	1
ENSG00000197409	HIST1H3C	H31_HUMAN	P68431	A_23_P219045	-0.384953	12.9878	-2.49046	0.0242327	0.775433	1
ENSG00000197409	HIST1H3D	H31_HUMAN	P68431	A_23_P219045	-0.384953	12.9878	-2.49046	0.0242327	0.775433	1
ENSG00000197409	HIST1H3E	H31_HUMAN	P68431	A_23_P219045	-0.384953	12.9878	-2.49046	0.0242327	0.775433	1
ENSG00000197409	HIST1H3F	H31_HUMAN	P68431	A_23_P219045	-0.384953	12.9878	-2.49046	0.0242327	0.775433	1
ENSG00000197409	HIST1H3G	H31_HUMAN	P68431	A_23_P219045	-0.384953	12.9878	-2.49046	0.0242327	0.775433	1
ENSG00000197409	HIST1H3H	H31_HUMAN	P68431	A_23_P219045	-0.384953	12.9878	-2.49046	0.0242327	0.775433	1
ENSG00000197409	HIST1H3I	H31_HUMAN	P68431	A_23_P219045	-0.384953	12.9878	-2.49046	0.0242327	0.775433	1
ENSG00000197409	HIST1H3J	H31_HUMAN	P68431	A_23_P219045	-0.384953	12.9878	-2.49046	0.0242327	0.775433	1
ENSG00000129250	KIF1C	KIF1C_HUMAN	O43896	A_32_P149288	-0.425324	10.5707	-2.49034	0.0242386	0.775433	1
ENSG00000188315	C3orf62	CC062_HUMAN	Q6ZUJ4	A_32_P831725	-0.274844	7.24339	-2.48881	0.0243134	0.775433	1
ENSG00000212978	-	-	-	A_32_P49728	-0.280589	9.49795	-2.48877	0.0243152	0.775433	1
ENSG00000233570	-	-	-	A_32_P217128	0.377877	6.97289	2.48787	0.0243591	0.775433	1
ENSG00000182389	CACNB4	CACB4_HUMAN	O00305	A_23_P209227	0.30291	6.98127	2.4865	0.0244261	0.775433	1
ENSG00000138395	CDK15	CDK15_HUMAN	Q96Q40	A_23_P154050	0.250152	6.93536	2.48547	0.0244764	0.775433	1
ENSG00000066136	NFYC	NFYC_HUMAN	Q13952	A_24_P299489	-0.284698	7.03353	-2.48511	0.0244944	0.775433	1
ENSG00000116001	TIA1	TIA1_HUMAN	P31483	A_24_P417474	-0.446986	9.97381	-2.48464	0.0245175	0.775433	1
ENSG00000104218	CSPP1	CSPP1_HUMAN	Q1MSJ5	A_23_P169558	-0.260359	9.33943	-2.48437	0.0245304	0.775433	1
ENSG00000271601	LIX1L	LIX1L_HUMAN	Q8IVB5	A_24_P687594	0.313831	9.65282	2.48421	0.0245384	0.775433	1
ENSG00000277363	SRCIN1	-	-	A_24_P248083	0.341482	6.93734	2.48364	0.0245667	0.775433	1
ENSG00000101146	RAE1	RAE1L_HUMAN	P78406	A_23_P346206	0.277404	11.4492	2.48112	0.0246907	0.775433	1
ENSG00000168724	DNAJC21	DJC21_HUMAN	Q5F1R6	A_24_P453740	0.207438	8.45634	2.48039	0.0247268	0.775433	1
ENSG00000090266	NDUFB2	NDUB2_HUMAN	O95178	A_24_P406301	-0.253152	15.5	-2.48012	0.0247403	0.775433	1
ENSG00000216740	-	-	-	A_24_P323114	0.372645	8.63649	2.4799	0.024751	0.775433	1
ENSG00000279390	-	-	-	A_32_P186832	-0.303096	7.01695	-2.47976	0.024758	0.775433	1
ENSG00000244005	NFS1	NFS1_HUMAN	Q9Y697	A_23_P102842	-0.27731	10.165	-2.47921	0.0247855	0.775433	1
ENSG00000134602	MST4	-	-	A_23_P32414	-0.249852	13.1077	-2.47817	0.024837	0.775433	1
ENSG00000115414	FN1	FINC_HUMAN	P02751	A_24_P334130	-0.467994	8.70542	-2.47801	0.0248453	0.775433	1
ENSG00000105352	CEACAM4	CEAM4_HUMAN	O75871	A_24_P70480	-0.292858	7.09637	-2.47732	0.0248796	0.775433	1
ENSG00000102466	FGF14	FGF14_HUMAN	Q92915	A_23_P88033	-0.338634	6.96198	-2.47667	0.0249121	0.775433	1
ENSG00000167733	HSD11B1L	DHI1L_HUMAN	Q7Z5J1	A_23_P141992	-0.256202	8.30031	-2.47659	0.0249157	0.775433	1
ENSG00000137337	MDC1	MDC1_HUMAN	Q14676	A_23_P19455	-0.321766	11.3196	-2.47649	0.0249209	0.775433	1
ENSG00000181135	ZNF707	ZN707_HUMAN	Q96C28	A_24_P715644	0.365819	6.85978	2.476	0.0249451	0.775433	1
ENSG00000186594	-	-	-	A_23_P49610	0.432487	9.79761	2.47519	0.0249858	0.775433	1
ENSG00000272145	-	-	-	A_24_P315500	0.33392	10.0489	2.47457	0.0250171	0.775433	1
ENSG00000224094	-	-	-	A_23_P1206	-0.311388	16.973	-2.47427	0.0250321	0.775433	1
ENSG00000227008	-	-	-	A_23_P1206	-0.311388	16.973	-2.47427	0.0250321	0.775433	1
ENSG00000242163	-	-	-	A_23_P1206	-0.311388	16.973	-2.47427	0.0250321	0.775433	1
ENSG00000271029	-	-	-	A_23_P1206	-0.311388	16.973	-2.47427	0.0250321	0.775433	1
ENSG00000138326	RPS24	RS24_HUMAN	P62847	A_23_P1206	-0.311388	16.973	-2.47427	0.0250321	0.775433	1
ENSG00000127870	RNF6	RNF6_HUMAN	Q9Y252	A_23_P162734	0.281469	9.91089	2.47367	0.0250619	0.775433	1
ENSG00000112782	CLIC5	CLIC5_HUMAN	Q9NZA1	A_23_P416774	0.295563	7.12394	2.47352	0.0250696	0.775433	1
ENSG00000152952	PLOD2	PLOD2_HUMAN	O00469	A_23_P211910	-0.41663	10.8612	-2.47332	0.0250795	0.775433	1
ENSG00000175130	MARCKSL1	MRP_HUMAN	P49006	A_23_P310	-0.364516	13.3897	-2.47303	0.025094	0.775433	1
ENSG00000129951	LPPR3	-	-	A_23_P67569	-0.350742	11.6313	-2.47174	0.0251591	0.775433	1
ENSG00000076242	MLH1	MLH1_HUMAN	P40692	A_23_P69058	-0.305214	13.1819	-2.47066	0.0252135	0.775433	1
ENSG00000123353	ORMDL2	ORML2_HUMAN	Q53FV1	A_23_P87500	0.264702	13.6866	2.47002	0.0252455	0.775433	1
ENSG00000135912	TTLL4	TTLL4_HUMAN	Q14679	A_23_P142697	-0.318807	9.91562	-2.47001	0.025246	0.775433	1
ENSG00000187239	FNBP1	FNBP1_HUMAN	Q96RU3	A_24_P205130	0.249589	10.044	2.46911	0.0252919	0.775433	1
ENSG00000122008	POLK	POLK_HUMAN	Q9UBT6	A_24_P919863	-0.318055	6.91743	-2.46897	0.0252987	0.775433	1
ENSG00000114739	ACVR2B	AVR2B_HUMAN	Q13705	A_24_P231132	-0.422993	14.3887	-2.4685	0.0253228	0.775433	1
ENSG00000106789	CORO2A	COR2A_HUMAN	Q92828	A_23_P146444	0.278668	10.7098	2.46824	0.025336	0.775433	1
ENSG00000105829	BET1	BET1_HUMAN	O15155	A_24_P269432	0.271104	9.85042	2.46807	0.0253446	0.775433	1
ENSG00000105829	DKFZp781C0425	BET1_HUMAN	O15155	A_24_P269432	0.271104	9.85042	2.46807	0.0253446	0.775433	1
ENSG00000198612	COPS8	CSN8_HUMAN	Q99627	A_23_P144257	0.252154	11.0902	2.46768	0.025364	0.775433	1
ENSG00000214552	-	-	-	A_23_P144257	0.252154	11.0902	2.46768	0.025364	0.775433	1
ENSG00000162396	PARS2	SYPM_HUMAN	Q7L3T8	A_23_P51291	-0.26768	9.09934	-2.4673	0.0253835	0.775433	1
ENSG00000103381	CPPED1	CPPED_HUMAN	Q9BRF8	A_23_P77401	0.243652	9.12585	2.46691	0.0254035	0.775433	1
ENSG00000274570	-	-	-	A_23_P425967	-0.356414	6.95082	-2.46676	0.0254111	0.775433	1
ENSG00000136206	SPDYE1	SPDE1_HUMAN	Q8NFV5	A_23_P425967	-0.356414	6.95082	-2.46676	0.0254111	0.775433	1
ENSG00000170092	SPDYE5	-	-	A_23_P425967	-0.356414	6.95082	-2.46676	0.0254111	0.775433	1
ENSG00000275976	-	-	-	A_23_P425967	-0.356414	6.95082	-2.46676	0.0254111	0.775433	1
ENSG00000179994	-	-	-	A_23_P425967	-0.356414	6.95082	-2.46676	0.0254111	0.775433	1
ENSG00000262461	-	-	-	A_23_P425967	-0.356414	6.95082	-2.46676	0.0254111	0.775433	1
ENSG00000273520	-	-	-	A_23_P425967	-0.356414	6.95082	-2.46676	0.0254111	0.775433	1
ENSG00000278626	-	-	-	A_32_P116957	-0.276446	7.04648	-2.46607	0.0254461	0.775433	1
ENSG00000059769	DNAJC25	DJC25_HUMAN	Q9H1X3	A_23_P397019	0.218094	8.303	2.46586	0.025457	0.775433	1
ENSG00000112116	IL17F	IL17F_HUMAN	Q96PD4	A_23_P167882	0.283504	7.09147	2.46531	0.0254846	0.775433	1
ENSG00000278677	HIST1H2AG	H2A1_HUMAN	P0C0S8	A_32_P221799	-0.407534	10.4051	-2.46522	0.0254893	0.775433	1
ENSG00000278677	HIST1H2AI	H2A1_HUMAN	P0C0S8	A_32_P221799	-0.407534	10.4051	-2.46522	0.0254893	0.775433	1
ENSG00000278677	HIST1H2AK	H2A1_HUMAN	P0C0S8	A_32_P221799	-0.407534	10.4051	-2.46522	0.0254893	0.775433	1
ENSG00000278677	HIST1H2AL	H2A1_HUMAN	P0C0S8	A_32_P221799	-0.407534	10.4051	-2.46522	0.0254893	0.775433	1
ENSG00000278677	HIST1H2AM	H2A1_HUMAN	P0C0S8	A_32_P221799	-0.407534	10.4051	-2.46522	0.0254893	0.775433	1
ENSG00000143199	ADCY10	ADCYA_HUMAN	Q96PN6	A_23_P126313	0.273625	7.0595	2.4648	0.0255106	0.775433	1
ENSG00000110536	PTPMT1	PTPM1_HUMAN	Q8WUK0	A_24_P110062	0.226169	8.34441	2.46461	0.0255205	0.775433	1
ENSG00000240624	-	-	-	A_24_P754989	0.220788	7.36222	2.46441	0.0255305	0.775433	1
ENSG00000166037	CEP57	CEP57_HUMAN	Q86XR8	A_23_P86822	-0.304689	9.93982	-2.4639	0.0255565	0.775433	1
ENSG00000237580	-	-	-	A_24_P696507	0.249168	12.6354	2.4637	0.0255669	0.775433	1
ENSG00000023228	NDUFS1	NDUS1_HUMAN	P28331	A_24_P696507	0.249168	12.6354	2.4637	0.0255669	0.775433	1
ENSG00000183741	CBX6	CBX6_HUMAN	O95503	A_24_P254437	-0.275363	9.06836	-2.4626	0.0256234	0.775433	1
ENSG00000181260	-	-	-	A_24_P195528	0.29741	7.69082	2.46245	0.025631	0.775433	1
ENSG00000170848	PSG6	PSG6_HUMAN	Q00889	A_23_P5103	-0.384352	6.90613	-2.46199	0.0256546	0.775433	1
ENSG00000243137	PSG4	PSG4_HUMAN	Q00888	A_23_P5103	-0.384352	6.90613	-2.46199	0.0256546	0.775433	1
ENSG00000114805	PLCH1	PLCH1_HUMAN	Q4KWH8	A_23_P339240	-0.303913	8.16589	-2.46128	0.025691	0.775433	1
ENSG00000248529	-	-	-	A_24_P902042	-0.380489	6.99665	-2.46117	0.0256964	0.775433	1
ENSG00000228506	-	-	-	A_24_P722292	-0.29164	8.04015	-2.46077	0.0257169	0.775433	1
ENSG00000148358	GPR107	GP107_HUMAN	Q5VW38	A_24_P295379	-0.250402	12.0355	-2.46074	0.0257187	0.775433	1
ENSG00000063438	AHRR	AHRR_HUMAN	A9YTQ3	A_23_P344400	-0.383482	7.04331	-2.46065	0.0257232	0.775433	1
ENSG00000183798	EMILIN3	EMIL3_HUMAN	Q9NT22	A_23_P79816	0.283834	8.01624	2.46055	0.0257282	0.775433	1
ENSG00000240298	-	-	-	A_24_P340491	0.245083	12.7146	2.46046	0.0257331	0.775433	1
ENSG00000080802	CNOT4	CNOT4_HUMAN	O95628	A_24_P187351	0.292426	6.95745	2.46041	0.0257355	0.775433	1
ENSG00000163110	PDLIM5	PDLI5_HUMAN	Q96HC4	A_24_P174641	0.2497	10.3815	2.46041	0.0257357	0.775433	1
ENSG00000213025	-	-	-	A_32_P106646	-0.307109	12.7289	-2.45914	0.0258011	0.775433	1
ENSG00000203667	COX20	COX20_HUMAN	Q5RI15	A_32_P106646	-0.307109	12.7289	-2.45914	0.0258011	0.775433	1
ENSG00000136856	SLC2A8	GTR8_HUMAN	Q9NY64	A_23_P252783	-0.337689	12.928	-2.45881	0.025818	0.775433	1
ENSG00000196576	PLXNB2	PLXB2_HUMAN	O15031	A_32_P48397	-0.301006	12.1354	-2.45757	0.0258824	0.775433	1
ENSG00000269416	-	-	-	A_24_P940509	-0.221282	9.04634	-2.45736	0.0258931	0.775433	1
ENSG00000215288	-	-	-	A_23_P372516	0.242295	13.4909	2.45682	0.025921	0.775433	1
ENSG00000226363	-	-	-	A_32_P224727	-0.291605	7.66287	-2.45634	0.0259461	0.775433	1
ENSG00000168672	FAM84B	FA84B_HUMAN	Q96KN1	A_24_P329487	0.358507	10.346	2.45511	0.0260095	0.775433	1
ENSG00000275748	ARL17A	ARL17_HUMAN	Q8IVW1	A_23_P207680	-0.334731	7.97852	-2.45441	0.0260461	0.775433	1
ENSG00000275748	ARL17B	ARL17_HUMAN	Q8IVW1	A_23_P207680	-0.334731	7.97852	-2.45441	0.0260461	0.775433	1
ENSG00000276276	ARL17A	ARL17_HUMAN	Q8IVW1	A_23_P207680	-0.334731	7.97852	-2.45441	0.0260461	0.775433	1
ENSG00000276276	ARL17B	ARL17_HUMAN	Q8IVW1	A_23_P207680	-0.334731	7.97852	-2.45441	0.0260461	0.775433	1
ENSG00000275949	-	-	-	A_23_P207680	-0.334731	7.97852	-2.45441	0.0260461	0.775433	1
ENSG00000228696	ARL17A	ARL17_HUMAN	Q8IVW1	A_23_P207680	-0.334731	7.97852	-2.45441	0.0260461	0.775433	1
ENSG00000228696	ARL17B	ARL17_HUMAN	Q8IVW1	A_23_P207680	-0.334731	7.97852	-2.45441	0.0260461	0.775433	1
ENSG00000185829	ARL17A	ARL17_HUMAN	Q8IVW1	A_23_P207680	-0.334731	7.97852	-2.45441	0.0260461	0.775433	1
ENSG00000185829	ARL17B	ARL17_HUMAN	Q8IVW1	A_23_P207680	-0.334731	7.97852	-2.45441	0.0260461	0.775433	1
ENSG00000105855	ITGB8	ITB8_HUMAN	P26012	A_24_P929824	0.378343	7.0952	2.45434	0.0260497	0.775433	1
ENSG00000187024	PTRH1	PTH_HUMAN	Q86Y79	A_23_P256890	0.225056	10.396	2.45346	0.0260957	0.775433	1
ENSG00000149557	FEZ1	FEZ1_HUMAN	Q99689	A_24_P201552	-0.272752	8.54542	-2.45113	0.0262173	0.775433	1
ENSG00000198814	GK	GLPK_HUMAN	P32189	A_24_P100382	-0.265123	6.83692	-2.45071	0.0262394	0.775433	1
ENSG00000188725	SMIM15	SIM15_HUMAN	Q7Z3B0	A_32_P33821	0.286595	11.1182	2.45039	0.0262559	0.775433	1
ENSG00000108255	CRYBA1	CRBA1_HUMAN	P05813	A_23_P4254	-0.284964	7.03417	-2.44975	0.0262899	0.775433	1
ENSG00000197343	ZNF655	ZN655_HUMAN	Q8N720	A_23_P345081	0.247198	11.0287	2.44945	0.0263052	0.775433	1
ENSG00000105851	PIK3CG	PK3CG_HUMAN	P48736	A_24_P637651	-0.294278	6.91122	-2.44941	0.0263073	0.775433	1
ENSG00000228144	-	-	-	A_23_P25097	0.241088	10.4819	2.44917	0.0263201	0.775433	1
ENSG00000139233	LLPH	LLPH_HUMAN	Q9BRT6	A_23_P25097	0.241088	10.4819	2.44917	0.0263201	0.775433	1
ENSG00000068745	IP6K2	IP6K2_HUMAN	Q9UHH9	A_23_P301133	-0.327062	10.6368	-2.4476	0.0264026	0.775433	1
ENSG00000231245	-	-	-	A_23_P67992	0.248839	10.5644	2.44749	0.0264087	0.775433	1
ENSG00000197223	C1D	C1D_HUMAN	Q13901	A_23_P67992	0.248839	10.5644	2.44749	0.0264087	0.775433	1
ENSG00000133056	PIK3C2B	P3C2B_HUMAN	O00750	A_23_P200710	0.254067	10.2574	2.44615	0.0264793	0.775433	1
ENSG00000241595	KRTAP9-4	KRA94_HUMAN	Q9BYQ2	A_23_P207868	0.357558	6.95597	2.44584	0.0264954	0.775433	1
ENSG00000185668	POU3F1	PO3F1_HUMAN	Q03052	A_23_P97034	-0.246387	7.11458	-2.44577	0.0264995	0.775433	1
ENSG00000100626	GALNT16	GLT16_HUMAN	Q8N428	A_23_P76749	-0.308962	9.7062	-2.44557	0.02651	0.775433	1
ENSG00000163519	TRAT1	TRAT1_HUMAN	Q6PIZ9	A_23_P212568	0.26682	7.1691	2.44549	0.026514	0.775433	1
ENSG00000203734	ECT2L	ECT2L_HUMAN	Q008S8	A_24_P942346	0.233552	6.941	2.44547	0.0265151	0.775433	1
ENSG00000156802	ATAD2	ATAD2_HUMAN	Q6PL18	A_24_P59596	-0.227909	8.02561	-2.44506	0.026537	0.775433	1
ENSG00000172912	-	-	-	A_24_P913620	0.350926	8.14265	2.44498	0.0265411	0.775433	1
ENSG00000123836	PFKFB2	F262_HUMAN	O60825	A_23_P201508	0.240811	7.87992	2.44481	0.0265502	0.775433	1
ENSG00000012171	SEMA3B	SEM3B_HUMAN	Q13214	A_24_P294419	-0.274557	7.85286	-2.4447	0.0265558	0.775433	1
ENSG00000213593	TMX2	TMX2_HUMAN	Q9Y320	A_23_P104942	0.259113	11.9491	2.44468	0.0265571	0.775433	1
ENSG00000160801	PTH1R	PTH1R_HUMAN	Q03431	A_23_P167030	-0.282021	7.31977	-2.44273	0.0266604	0.775433	1
ENSG00000174238	PITPNA	PIPNA_HUMAN	Q00169	A_23_P77887	-0.241068	9.94492	-2.44258	0.0266685	0.775433	1
ENSG00000215475	SIAH3	SIAH3_HUMAN	Q8IW03	A_24_P110827	-0.395222	6.95593	-2.44257	0.0266693	0.775433	1
ENSG00000187653	-	-	-	A_24_P143189	0.255146	15.9655	2.44211	0.0266937	0.775433	1
ENSG00000230043	-	-	-	A_24_P143189	0.255146	15.9655	2.44211	0.0266937	0.775433	1
ENSG00000205542	TMSB4X	TYB4_HUMAN	P62328	A_24_P143189	0.255146	15.9655	2.44211	0.0266937	0.775433	1
ENSG00000236876	-	-	-	A_24_P143189	0.255146	15.9655	2.44211	0.0266937	0.775433	1
ENSG00000223551	TMSB4XP4	-	-	A_24_P143189	0.255146	15.9655	2.44211	0.0266937	0.775433	1
ENSG00000143324	XPR1	XPR1_HUMAN	Q9UBH6	A_24_P336417	-0.367049	10.3106	-2.44198	0.0267007	0.775433	1
ENSG00000101811	CSTF2	CSTF2_HUMAN	P33240	A_23_P148372	-0.273793	11.5432	-2.44114	0.0267455	0.775433	1
ENSG00000196531	NACA	NACAM_HUMAN	E9PAV3	A_24_P102043	0.284303	9.18363	2.44046	0.0267815	0.775433	1
ENSG00000196531	NACA	NACA_HUMAN	Q13765	A_24_P102043	0.284303	9.18363	2.44046	0.0267815	0.775433	1
ENSG00000138185	ENTPD1	ENTP1_HUMAN	P49961	A_23_P24260	-0.299779	7.4557	-2.44037	0.0267862	0.775433	1
ENSG00000154813	DPH3	DPH3_HUMAN	Q96FX2	A_24_P225907	0.274122	9.81108	2.44001	0.0268058	0.775433	1
ENSG00000161203	AP2M1	AP2M1_HUMAN	Q96CW1	A_23_P155624	-0.33044	13.3152	-2.43977	0.0268185	0.775433	1
ENSG00000170445	HARS	SYHC_HUMAN	P12081	A_23_P133227	-0.265679	11.8416	-2.43941	0.0268379	0.775433	1
ENSG00000174428	GTF2IRD2B	GTD2B_HUMAN	Q6EKJ0	A_24_P876864	-0.319782	10.0959	-2.43892	0.026864	0.775433	1
ENSG00000196275	GTF2IRD2	GTD2A_HUMAN	Q86UP8	A_24_P876864	-0.319782	10.0959	-2.43892	0.026864	0.775433	1
ENSG00000175193	PARL	PARL_HUMAN	Q9H300	A_24_P221883	-0.321458	11.3814	-2.43871	0.0268752	0.775433	1
ENSG00000125834	STK35	STK35_HUMAN	Q8TDR2	A_24_P940537	-0.24816	9.69077	-2.43853	0.026885	0.775433	1
ENSG00000143156	NME7	NDK7_HUMAN	Q9Y5B8	A_32_P223786	0.281871	7.22507	2.4383	0.0268973	0.775433	1
ENSG00000226306	-	-	-	A_24_P411573	0.404659	6.97338	2.43743	0.0269439	0.775433	1
ENSG00000187955	COL14A1	COEA1_HUMAN	Q05707	A_23_P216361	0.278071	7.16547	2.4369	0.0269725	0.775433	1
ENSG00000145050	MANF	MANF_HUMAN	P55145	A_23_P132793	0.364365	15.0162	2.43673	0.0269817	0.775433	1
ENSG00000185261	KIAA0825	K0825_HUMAN	Q8IV33	A_32_P138833	-0.285067	7.18283	-2.43647	0.0269956	0.775433	1
ENSG00000155115	GTF3C6	TF3C6_HUMAN	Q969F1	A_23_P400465	-0.228207	14.1085	-2.43638	0.0270003	0.775433	1
ENSG00000162433	AK4	KAD4_HUMAN	P27144	A_32_P95067	-0.29325	11.2489	-2.4363	0.0270045	0.775433	1
ENSG00000276966	HIST1H4A	H4_HUMAN	P62805	A_23_P415411	-0.454596	13.3073	-2.43596	0.0270233	0.775433	1
ENSG00000276966	HIST1H4B	H4_HUMAN	P62805	A_23_P415411	-0.454596	13.3073	-2.43596	0.0270233	0.775433	1
ENSG00000276966	HIST1H4C	H4_HUMAN	P62805	A_23_P415411	-0.454596	13.3073	-2.43596	0.0270233	0.775433	1
ENSG00000276966	HIST1H4D	H4_HUMAN	P62805	A_23_P415411	-0.454596	13.3073	-2.43596	0.0270233	0.775433	1
ENSG00000276966	HIST1H4E	H4_HUMAN	P62805	A_23_P415411	-0.454596	13.3073	-2.43596	0.0270233	0.775433	1
ENSG00000276966	HIST1H4F	H4_HUMAN	P62805	A_23_P415411	-0.454596	13.3073	-2.43596	0.0270233	0.775433	1
ENSG00000276966	HIST1H4H	H4_HUMAN	P62805	A_23_P415411	-0.454596	13.3073	-2.43596	0.0270233	0.775433	1
ENSG00000276966	HIST1H4I	H4_HUMAN	P62805	A_23_P415411	-0.454596	13.3073	-2.43596	0.0270233	0.775433	1
ENSG00000276966	HIST1H4J	H4_HUMAN	P62805	A_23_P415411	-0.454596	13.3073	-2.43596	0.0270233	0.775433	1
ENSG00000276966	HIST1H4K	H4_HUMAN	P62805	A_23_P415411	-0.454596	13.3073	-2.43596	0.0270233	0.775433	1
ENSG00000276966	HIST1H4L	H4_HUMAN	P62805	A_23_P415411	-0.454596	13.3073	-2.43596	0.0270233	0.775433	1
ENSG00000276966	HIST2H4A	H4_HUMAN	P62805	A_23_P415411	-0.454596	13.3073	-2.43596	0.0270233	0.775433	1
ENSG00000276966	HIST2H4B	H4_HUMAN	P62805	A_23_P415411	-0.454596	13.3073	-2.43596	0.0270233	0.775433	1
ENSG00000276966	HIST4H4	H4_HUMAN	P62805	A_23_P415411	-0.454596	13.3073	-2.43596	0.0270233	0.775433	1
ENSG00000146830	GIGYF1	PERQ1_HUMAN	O75420	A_24_P163574	-0.363771	10.7171	-2.43466	0.027093	0.775433	1
ENSG00000153786	ZDHHC7	ZDHC7_HUMAN	Q9NXF8	A_24_P373297	0.224754	11.9498	2.43464	0.0270943	0.775433	1
ENSG00000221887	HMSD	HMSDV_HUMAN	P0C7T4	A_24_P147461	0.229304	7.06291	2.43417	0.0271195	0.775433	1
ENSG00000221887	HMSD	HMSD_HUMAN	A8MTL9	A_24_P147461	0.229304	7.06291	2.43417	0.0271195	0.775433	1
ENSG00000166401	SERPINB8	SPB8_HUMAN	P50452	A_24_P147461	0.229304	7.06291	2.43417	0.0271195	0.775433	1
ENSG00000070831	CDC42	CDC42_HUMAN	P60953	A_23_P300056	0.30815	7.43029	2.43409	0.0271242	0.775433	1
ENSG00000197818	SLC9A8	SL9A8_HUMAN	Q9Y2E8	A_24_P58054	0.21381	8.26487	2.43391	0.0271338	0.775433	1
ENSG00000172053	QARS	SYQ_HUMAN	P47897	A_23_P146736	-0.258623	13.9749	-2.43373	0.0271435	0.775433	1
ENSG00000277775	HIST1H3A	H31_HUMAN	P68431	A_23_P30799	-0.372079	12.3955	-2.43304	0.0271808	0.775433	1
ENSG00000277775	HIST1H3B	H31_HUMAN	P68431	A_23_P30799	-0.372079	12.3955	-2.43304	0.0271808	0.775433	1
ENSG00000277775	HIST1H3C	H31_HUMAN	P68431	A_23_P30799	-0.372079	12.3955	-2.43304	0.0271808	0.775433	1
ENSG00000277775	HIST1H3D	H31_HUMAN	P68431	A_23_P30799	-0.372079	12.3955	-2.43304	0.0271808	0.775433	1
ENSG00000277775	HIST1H3E	H31_HUMAN	P68431	A_23_P30799	-0.372079	12.3955	-2.43304	0.0271808	0.775433	1
ENSG00000277775	HIST1H3F	H31_HUMAN	P68431	A_23_P30799	-0.372079	12.3955	-2.43304	0.0271808	0.775433	1
ENSG00000277775	HIST1H3G	H31_HUMAN	P68431	A_23_P30799	-0.372079	12.3955	-2.43304	0.0271808	0.775433	1
ENSG00000277775	HIST1H3H	H31_HUMAN	P68431	A_23_P30799	-0.372079	12.3955	-2.43304	0.0271808	0.775433	1
ENSG00000277775	HIST1H3I	H31_HUMAN	P68431	A_23_P30799	-0.372079	12.3955	-2.43304	0.0271808	0.775433	1
ENSG00000277775	HIST1H3J	H31_HUMAN	P68431	A_23_P30799	-0.372079	12.3955	-2.43304	0.0271808	0.775433	1
ENSG00000121957	GPSM2	GPSM2_HUMAN	P81274	A_23_P63402	0.367516	10.4328	2.43265	0.0272021	0.775433	1
ENSG00000212932	-	-	-	A_24_P153043	0.234502	15.1659	2.43263	0.0272032	0.775433	1
ENSG00000228463	-	-	-	A_24_P153043	0.234502	15.1659	2.43263	0.0272032	0.775433	1
ENSG00000241670	-	-	-	A_24_P153043	0.234502	15.1659	2.43263	0.0272032	0.775433	1
ENSG00000123570	RAB9B	RAB9B_HUMAN	Q9NP90	A_24_P126139	0.363409	6.95053	2.43242	0.0272143	0.775433	1
ENSG00000158714	SLAMF8	SLAF8_HUMAN	Q9P0V8	A_23_P200138	0.311932	7.0788	2.43223	0.0272248	0.775433	1
ENSG00000136842	TMOD1	TMOD1_HUMAN	P28289	A_23_P112289	0.427106	8.55683	2.43178	0.0272494	0.775433	1
ENSG00000171033	PKIA	IPKA_HUMAN	P61925	A_23_P31765	-0.269385	9.99641	-2.43164	0.0272569	0.775433	1
ENSG00000139151	PLCZ1	PLCZ1_HUMAN	Q86YW0	A_23_P105524	0.329653	7.01741	2.43142	0.0272687	0.775433	1
ENSG00000112679	DUSP22	DUS22_HUMAN	Q9NRW4	A_23_P167905	-0.329888	9.52913	-2.43062	0.0273121	0.775433	1
ENSG00000253677	-	-	-	A_23_P215096	0.375847	10.4817	2.43016	0.0273375	0.775433	1
ENSG00000186591	UBE2H	UBE2H_HUMAN	P62256	A_23_P215096	0.375847	10.4817	2.43016	0.0273375	0.775433	1
ENSG00000254692	TM9SF1	-	-	A_24_P142024	0.225506	11.7317	2.43011	0.0273398	0.775433	1
ENSG00000260669	-	-	-	A_24_P142024	0.225506	11.7317	2.43011	0.0273398	0.775433	1
ENSG00000254505	CHMP4A	CHM4A_HUMAN	Q9BY43	A_24_P142024	0.225506	11.7317	2.43011	0.0273398	0.775433	1
ENSG00000111145	ELK3	ELK3_HUMAN	P41970	A_24_P133171	0.355038	10.6479	2.43009	0.0273411	0.775433	1
ENSG00000123815	ADCK4	ADCK4_HUMAN	Q96D53	A_23_P208400	-0.265972	8.78793	-2.42971	0.0273618	0.775433	1
ENSG00000171360	KRT38	KRT38_HUMAN	O76015	A_23_P100991	0.339405	6.91304	2.42897	0.0274019	0.775433	1
ENSG00000258227	CLEC5A	CLC5A_HUMAN	Q9NY25	A_23_P304356	-0.421739	6.90791	-2.42887	0.0274075	0.775433	1
ENSG00000122970	IFT81	-	-	A_23_P48130	0.290249	7.30736	2.42864	0.0274203	0.775433	1
ENSG00000099795	NDUFB7	NDUB7_HUMAN	P17568	A_24_P14434	-0.29622	14.1271	-2.42856	0.0274243	0.775433	1
ENSG00000198221	-	-	-	A_32_P334340	0.329453	8.04906	2.42796	0.0274576	0.775433	1
ENSG00000110442	COMMD9	COMD9_HUMAN	Q9P000	A_32_P27250	0.314469	6.98076	2.42788	0.0274616	0.775433	1
ENSG00000129003	VPS13C	VP13C_HUMAN	Q709C8	A_23_P206228	0.247755	8.62488	2.4274	0.0274882	0.775433	1
ENSG00000131013	PPIL4	PPIL4_HUMAN	Q8WUA2	A_23_P42507	-0.257459	9.86022	-2.42734	0.0274914	0.775433	1
ENSG00000164821	DEFA4	DEF4_HUMAN	P12838	A_23_P326080	0.438591	6.99522	2.42727	0.0274949	0.775433	1
ENSG00000127957	-	-	-	A_23_P59630	-0.314729	9.95424	-2.42726	0.0274956	0.775433	1
ENSG00000144619	CNTN4	CNTN4_HUMAN	Q8IWV2	A_24_P208730	-0.263475	7.50309	-2.42678	0.0275217	0.775433	1
ENSG00000065911	MTHFD2	MTDC_HUMAN	P13995	A_23_P120316	0.294519	12.5578	2.42678	0.027522	0.775433	1
ENSG00000158747	NBL1	NBL1_HUMAN	P41271	A_23_P51958	0.356389	9.93616	2.42642	0.0275417	0.775433	1
ENSG00000270136	MINOS1-NBL1	-	-	A_23_P51958	0.356389	9.93616	2.42642	0.0275417	0.775433	1
ENSG00000213762	ZNF134	ZN134_HUMAN	P52741	A_23_P325661	0.27433	9.75997	2.42621	0.0275533	0.775433	1
ENSG00000237412	PRSS56	PRS56_HUMAN	P0CW18	A_24_P15182	0.347055	9.32059	2.42603	0.0275632	0.775433	1
ENSG00000140265	ZSCAN29	ZSC29_HUMAN	Q8IWY8	A_24_P942730	-0.257538	9.94255	-2.42591	0.0275698	0.775433	1
ENSG00000170502	NUDT9	NUDT9_HUMAN	Q9BW91	A_23_P94860	0.256683	10.7234	2.4258	0.0275757	0.775433	1
ENSG00000226626	-	-	-	A_24_P58894	0.442535	10.3763	2.42533	0.0276014	0.775433	1
ENSG00000058804	NDC1	NDC1_HUMAN	Q9BTX1	A_24_P222192	-0.356766	9.41377	-2.42531	0.0276029	0.775433	1
ENSG00000116852	KIF21B	KI21B_HUMAN	O75037	A_23_P126888	-0.266295	8.69656	-2.4252	0.0276089	0.775433	1
ENSG00000106049	HIBADH	3HIDH_HUMAN	P31937	A_23_P335428	-0.318648	11.4164	-2.42498	0.0276208	0.775433	1
ENSG00000157933	SKI	SKI_HUMAN	P12755	A_23_P325631	-0.295437	9.00271	-2.4247	0.0276361	0.775433	1
ENSG00000215190	-	-	-	A_24_P614148	0.231475	9.25127	2.42453	0.0276457	0.775433	1
ENSG00000136213	CHST12	CHSTC_HUMAN	Q9NRB3	A_23_P310421	-0.297896	10.1605	-2.42406	0.0276712	0.775433	1
ENSG00000213923	CSNK1E	KC1E_HUMAN	P49674	A_23_P40664	-0.291324	15.6664	-2.42344	0.0277056	0.775433	1
ENSG00000055609	KMT2C	KMT2C_HUMAN	Q8NEZ4	A_23_P168419	-0.258865	7.90311	-2.4234	0.0277079	0.775433	1
ENSG00000065548	ZC3H15	ZC3HF_HUMAN	Q8WU90	A_23_P56380	0.272265	12.2268	2.42329	0.0277139	0.775433	1
ENSG00000262477	-	-	-	A_32_P93187	-0.265664	8.68506	-2.42286	0.0277376	0.775433	1
ENSG00000270625	-	-	-	A_32_P93187	-0.265664	8.68506	-2.42286	0.0277376	0.775433	1
ENSG00000169188	APEX2	APEX2_HUMAN	Q9UBZ4	A_23_P256682	-0.278301	12.1897	-2.42277	0.0277426	0.775433	1
ENSG00000138386	NAB1	NAB1_HUMAN	Q13506	A_23_P209805	-0.308122	9.95201	-2.42263	0.0277503	0.775433	1
ENSG00000161638	ITGA5	ITA5_HUMAN	P08648	A_23_P36562	-0.336264	11.4646	-2.42217	0.0277758	0.775433	1
ENSG00000100427	MLC1	MLC1_HUMAN	Q15049	A_23_P211680	0.4669	6.86479	2.42158	0.0278083	0.775433	1
ENSG00000053747	LAMA3	LAMA3_HUMAN	Q16787	A_24_P179569	-0.376052	7.01634	-2.42105	0.0278379	0.775433	1
ENSG00000158113	LRRC43	LRC43_HUMAN	Q8N309	A_23_P396724	-0.253321	7.05139	-2.42029	0.0278801	0.775433	1
ENSG00000090013	BLVRB	BLVRB_HUMAN	P30043	A_23_P153351	-0.220802	11.4451	-2.42027	0.0278808	0.775433	1
ENSG00000223489	-	-	-	A_24_P400702	-0.24994	7.19911	-2.42002	0.0278948	0.775433	1
ENSG00000151834	GABRA2	GBRA2_HUMAN	P47869	A_23_P167121	-0.337308	7.07249	-2.41871	0.0279677	0.775433	1
ENSG00000163512	AZI2	AZI2_HUMAN	Q9H6S1	A_23_P109682	0.270501	10.5893	2.41799	0.0280079	0.775433	1
ENSG00000239697	TNFSF12	TNF12_HUMAN	O43508	A_24_P245298	-0.265703	9.03764	-2.41739	0.0280411	0.775433	1
ENSG00000161955	TNFSF13	TNF13_HUMAN	O75888	A_24_P245298	-0.265703	9.03764	-2.41739	0.0280411	0.775433	1
ENSG00000065154	OAT	OAT_HUMAN	P04181	A_23_P98092	0.280562	11.7803	2.41664	0.028083	0.775433	1
ENSG00000276943	-	-	-	A_24_P98021	0.24919	10.6858	2.4153	0.0281583	0.775433	1
ENSG00000135525	MAP7	MAP7_HUMAN	Q14244	A_24_P98021	0.24919	10.6858	2.4153	0.0281583	0.775433	1
ENSG00000275746	KLF13	KLF13_HUMAN	Q9Y2Y9	A_23_P413150	-0.305502	8.18301	-2.41505	0.0281723	0.775433	1
ENSG00000169926	KLF13	KLF13_HUMAN	Q9Y2Y9	A_23_P413150	-0.305502	8.18301	-2.41505	0.0281723	0.775433	1
ENSG00000167701	GPT	ALAT1_HUMAN	P24298	A_23_P146339	0.252153	8.56186	2.41397	0.0282327	0.775433	1
ENSG00000135482	ZC3H10	ZC3HA_HUMAN	Q96K80	A_23_P139455	-0.264303	9.3309	-2.41365	0.0282509	0.775433	1
ENSG00000198055	GRK6	GRK6_HUMAN	P43250	A_23_P257256	-0.238971	11.5623	-2.41339	0.0282651	0.775433	1
ENSG00000077522	ACTN2	ACTN2_HUMAN	P35609	A_23_P115021	-0.275516	7.31872	-2.41307	0.0282835	0.775433	1
ENSG00000047662	FAM184B	F184B_HUMAN	Q9ULE4	A_23_P301572	0.378698	7.00369	2.41254	0.0283129	0.775433	1
ENSG00000160216	AGPAT3	PLCC_HUMAN	Q9NRZ7	A_23_P356466	0.398617	9.88675	2.41238	0.0283224	0.775433	1
ENSG00000157911	PEX10	PEX10_HUMAN	O60683	A_24_P173727	0.328907	8.17704	2.4121	0.0283377	0.775433	1
ENSG00000132388	UBE2G1	UB2G1_HUMAN	P62253	A_23_P27066	0.225268	11.1785	2.41207	0.0283395	0.775433	1
ENSG00000104998	IL27RA	I27RA_HUMAN	Q6UWB1	A_24_P348326	-0.264111	10.2807	-2.41123	0.0283869	0.775433	1
ENSG00000091732	ZC3HC1	NIPA_HUMAN	Q86WB0	A_23_P215088	-0.302469	11.5593	-2.41092	0.0284042	0.775433	1
ENSG00000131495	NDUFA2	NDUA2_HUMAN	O43678	A_23_P257795	-0.228809	14.2781	-2.41054	0.0284262	0.775433	1
ENSG00000131238	PPT1	PPT1_HUMAN	P50897	A_23_P62659	-0.332802	14.1723	-2.41041	0.0284333	0.775433	1
ENSG00000136504	KAT7	KAT7_HUMAN	O95251	A_23_P152818	-0.272724	9.6686	-2.40946	0.0284871	0.775433	1
ENSG00000105325	FZR1	FZR_HUMAN	Q9UM11	A_23_P142325	-0.218561	8.8936	-2.40945	0.0284878	0.775433	1
ENSG00000105438	KDELR1	ERD21_HUMAN	P24390	A_23_P4913	-0.238428	12.3177	-2.40808	0.0285654	0.775433	1
ENSG00000259498	-	-	-	A_24_P179244	-0.274176	6.88649	-2.40806	0.0285662	0.775433	1
ENSG00000102870	ZNF629	ZN629_HUMAN	Q9UEG4	A_23_P163816	-0.287868	13.204	-2.4078	0.0285809	0.775433	1
ENSG00000163879	DNALI1	IDLC_HUMAN	O14645	A_23_P160377	-0.27525	12.2589	-2.4075	0.0285983	0.775433	1
ENSG00000180116	C12orf40	CL040_HUMAN	Q86WS4	A_24_P249812	-0.315556	7.01406	-2.40677	0.0286398	0.775433	1
ENSG00000112701	SENP6	SENP6_HUMAN	Q9GZR1	A_24_P106382	-0.311195	8.72288	-2.40657	0.0286512	0.775433	1
ENSG00000268104	SLC6A14	S6A14_HUMAN	Q9UN76	A_24_P365721	0.23198	6.88334	2.40641	0.0286605	0.775433	1
ENSG00000165325	CCDC67	DEUP1_HUMAN	Q05D60	A_32_P153954	-0.251454	6.98809	-2.40616	0.0286743	0.775433	1
ENSG00000161999	JMJD8	JMJD8_HUMAN	Q96S16	A_23_P15073	-0.277835	9.98829	-2.40612	0.0286769	0.775433	1
ENSG00000184640	40057	SEPT9_HUMAN	Q9UHD8	A_24_P147910	-0.280986	8.35769	-2.40573	0.0286992	0.775433	1
ENSG00000155016	CYP2U1	CP2U1_HUMAN	Q7Z449	A_24_P913156	0.303136	6.97812	2.40516	0.0287314	0.775433	1
ENSG00000096696	DSP	DESP_HUMAN	P15924	A_32_P157945	0.319605	13.4426	2.40499	0.0287412	0.775433	1
ENSG00000018236	CNTN1	CNTN1_HUMAN	Q12860	A_24_P128200	-0.334871	7.0203	-2.40472	0.0287568	0.775433	1
ENSG00000197496	SLC2A10	GTR10_HUMAN	O95528	A_24_P271323	-0.294522	8.37744	-2.40426	0.028783	0.775433	1
ENSG00000175294	CATSPER1	CTSR1_HUMAN	Q8NEC5	A_23_P52676	0.268055	7.06944	2.40412	0.0287908	0.775433	1
ENSG00000226342	-	-	-	A_32_P205616	-0.245441	7.37084	-2.40258	0.028879	0.775433	1
ENSG00000231504	-	-	-	A_32_P205616	-0.245441	7.37084	-2.40258	0.028879	0.775433	1
ENSG00000204237	OXLD1	OXLD1_HUMAN	Q5BKU9	A_24_P45160	-0.342918	12.0375	-2.40248	0.0288847	0.775433	1
ENSG00000099917	MED15	MED15_HUMAN	Q96RN5	A_24_P207727	-0.219543	10.0233	-2.40239	0.0288898	0.775433	1
ENSG00000168286	THAP11	THA11_HUMAN	Q96EK4	A_24_P365954	-0.243264	9.24134	-2.40159	0.0289359	0.775433	1
ENSG00000188001	TPRG1	TPRG1_HUMAN	Q6ZUI0	A_24_P586712	0.380085	6.96362	2.40105	0.0289669	0.775433	1
ENSG00000004777	ARHGAP33	RHG33_HUMAN	O14559	A_23_P404730	-0.230302	8.52595	-2.40092	0.0289745	0.775433	1
ENSG00000184117	NIPSNAP1	NIPS1_HUMAN	Q9BPW8	A_24_P237278	-0.344082	10.1134	-2.40014	0.0290192	0.775433	1
ENSG00000152092	ASTN1	ASTN1_HUMAN	O14525	A_23_P301021	0.315675	7.10886	2.39999	0.0290281	0.775433	1
ENSG00000272325	NUDT3	NUDT3_HUMAN	O95989	A_24_P123632	-0.292466	8.96727	-2.39984	0.0290366	0.775433	1
ENSG00000125901	MRPS26	RT26_HUMAN	Q9BYN8	A_23_P252536	-0.299962	12.9072	-2.39961	0.0290502	0.775433	1
ENSG00000105329	TGFB1	TGFB1_HUMAN	P01137	A_24_P96171	0.293887	10.5499	2.39908	0.0290807	0.775433	1
ENSG00000123810	B9D2	B9D2_HUMAN	Q9BPU9	A_24_P96171	0.293887	10.5499	2.39908	0.0290807	0.775433	1
ENSG00000174197	MGA	MGAP_HUMAN	Q8IWI9	A_23_P37654	-0.320474	11.2706	-2.39898	0.0290862	0.775433	1
ENSG00000205181	-	-	-	A_32_P201378	-0.266764	7.3783	-2.39885	0.0290936	0.775433	1
ENSG00000235706	-	-	-	A_24_P678418	-0.345943	8.23474	-2.39831	0.029125	0.775433	1
ENSG00000066777	ARFGEF1	BIG1_HUMAN	Q9Y6D6	A_24_P599396	0.221332	7.31517	2.39806	0.0291399	0.775433	1
ENSG00000131871	VIMP	SELS_HUMAN	Q9BQE4	A_24_P912889	0.256429	8.68489	2.39796	0.0291455	0.775433	1
ENSG00000176953	NFATC2IP	NF2IP_HUMAN	Q8NCF5	A_23_P125157	-0.40895	8.93826	-2.39791	0.0291484	0.775433	1
ENSG00000117899	MESDC2	MESD_HUMAN	Q14696	A_23_P88503	0.22412	11.8458	2.39789	0.0291492	0.775433	1
ENSG00000181378	CCDC108	CC108_HUMAN	Q6ZU64	A_32_P176701	0.299732	9.59859	2.39741	0.0291771	0.775433	1
ENSG00000145246	ATP10D	AT10D_HUMAN	Q9P241	A_24_P919399	0.231672	7.08411	2.39736	0.0291802	0.775433	1
ENSG00000104343	UBE2W	UBE2W_HUMAN	Q96B02	A_23_P71433	-0.30962	10.6112	-2.39727	0.0291852	0.775433	1
ENSG00000221972	C3orf36	CC036_HUMAN	Q3SXR2	A_23_P92176	-0.300654	7.08121	-2.397	0.029201	0.775433	1
ENSG00000113492	AGXT2	AGT2_HUMAN	Q9BYV1	A_24_P63468	0.300679	6.9869	2.39594	0.0292627	0.775433	1
ENSG00000264735	-	-	-	A_23_P352648	0.272786	6.9375	2.39581	0.0292702	0.775433	1
ENSG00000235652	-	-	-	A_24_P772450	0.279313	6.823	2.39568	0.0292777	0.775433	1
ENSG00000010704	HFE	HFE_HUMAN	Q30201	A_24_P111996	-0.255548	7.1229	-2.39486	0.0293251	0.775433	1
ENSG00000065665	SEC61A2	S61A2_HUMAN	Q9H9S3	A_24_P415280	-0.226803	8.83244	-2.39466	0.0293368	0.775433	1
ENSG00000168496	FEN1	FEN1_HUMAN	P39748	A_24_P73158	-0.265932	11.0247	-2.39454	0.0293438	0.775433	1
ENSG00000070182	SPTB	SPTB1_HUMAN	P11277	A_32_P134974	-0.295853	7.10582	-2.39439	0.0293526	0.775433	1
ENSG00000070731	ST6GALNAC2	SIA7B_HUMAN	Q9UJ37	A_32_P9597	-0.291913	7.6934	-2.39437	0.029354	0.775433	1
ENSG00000115507	OTX1	OTX1_HUMAN	P32242	A_23_P403284	-0.480753	8.26523	-2.39379	0.0293873	0.775433	1
ENSG00000164199	GPR98	GPR98_HUMAN	Q8WXG9	A_24_P419058	-0.282504	6.94318	-2.39245	0.0294659	0.775433	1
ENSG00000251235	-	-	-	A_32_P213210	0.240137	10.5638	2.39173	0.029508	0.775433	1
ENSG00000110080	ST3GAL4	SIA4C_HUMAN	Q11206	A_23_P393856	0.250709	7.26689	2.39158	0.0295167	0.775433	1
ENSG00000101189	MRGBP	MRGBP_HUMAN	Q9NV56	A_23_P17307	-0.231185	11.2486	-2.39154	0.0295192	0.775433	1
ENSG00000238269	PAGE2B	GGEE3_HUMAN	Q5JRK9	A_32_P109683	0.225138	7.23685	2.39022	0.0295962	0.775433	1
ENSG00000150991	UBC	UBC_HUMAN	P0CG48	A_23_P329740	0.280219	16.2711	2.39014	0.0296011	0.775433	1
ENSG00000168894	RNF181	RN181_HUMAN	Q9P0P0	A_23_P108708	-0.268648	13.4004	-2.39002	0.0296083	0.775433	1
ENSG00000140931	CMTM3	CKLF3_HUMAN	Q96MX0	A_23_P88865	0.244665	14.4612	2.38973	0.0296251	0.775433	1
ENSG00000130045	NXNL2	NXNL2_HUMAN	Q5VZ03	A_23_P169319	-0.307917	7.46577	-2.38891	0.0296735	0.775433	1
ENSG00000166342	NETO1	NETO1_HUMAN	Q8TDF5	A_24_P5653	-0.29182	7.26105	-2.38865	0.0296886	0.775433	1
ENSG00000126218	F10	FA10_HUMAN	P00742	A_23_P205177	-0.342357	8.68907	-2.38849	0.0296981	0.775433	1
ENSG00000198863	RUNDC1	RUND1_HUMAN	Q96C34	A_23_P129996	-0.268974	9.59728	-2.38804	0.0297246	0.775433	1
ENSG00000237999	-	-	-	A_24_P578445	0.317551	12.4668	2.38758	0.0297517	0.775433	1
ENSG00000125846	ZNF133	ZN133_HUMAN	P52736	A_23_P154730	-0.286675	11.1793	-2.38677	0.0297995	0.775433	1
ENSG00000089280	FUS	FUS_HUMAN	P35637	A_23_P106887	-0.253516	13.9281	-2.38675	0.0298008	0.775433	1
ENSG00000083457	ITGAE	ITAE_HUMAN	P38570	A_23_P218375	0.251897	10.7335	2.38675	0.0298011	0.775433	1
ENSG00000225439	-	-	-	A_24_P478556	-0.300684	9.36629	-2.38562	0.0298678	0.775433	1
ENSG00000108479	GALK1	GALK1_HUMAN	P51570	A_23_P141126	-0.254219	9.48186	-2.38561	0.0298685	0.775433	1
ENSG00000149488	TMC2	TMC2_HUMAN	Q8TDI7	A_23_P68517	0.509241	6.96234	2.38504	0.0299023	0.775433	1
ENSG00000185880	TRIM69	TRI69_HUMAN	Q86WT6	A_24_P50543	-0.265074	7.71307	-2.38421	0.0299513	0.775433	1
ENSG00000148248	SURF4	SURF4_HUMAN	O15260	A_24_P89971	0.288382	11.0377	2.38363	0.0299857	0.775433	1
ENSG00000076258	FMO4	FMO4_HUMAN	P31512	A_23_P160992	-0.236127	7.49515	-2.38352	0.0299926	0.775433	1
ENSG00000165023	DIRAS2	DIRA2_HUMAN	Q96HU8	A_23_P20660	-0.30862	7.0182	-2.38304	0.0300207	0.775433	1
ENSG00000100092	SH3BP1	3BP1_HUMAN	Q9Y3L3	A_24_P259192	-0.235018	8.03279	-2.38268	0.0300424	0.775433	1
ENSG00000229847	-	-	-	A_24_P892472	0.316532	7.00194	2.38224	0.0300684	0.775433	1
ENSG00000233369	-	-	-	A_32_P141374	-0.374399	10.9213	-2.38199	0.0300832	0.775433	1
ENSG00000275121	-	-	-	A_32_P141374	-0.374399	10.9213	-2.38199	0.0300832	0.775433	1
ENSG00000277053	-	-	-	A_32_P141374	-0.374399	10.9213	-2.38199	0.0300832	0.775433	1
ENSG00000274070	GATSL2	GATL2_HUMAN	A6NHX0	A_32_P141374	-0.374399	10.9213	-2.38199	0.0300832	0.775433	1
ENSG00000203805	PPAPDC1A	PPC1A_HUMAN	Q5VZY2	A_24_P810290	0.302123	10.3812	2.38199	0.0300832	0.775433	1
ENSG00000101292	PROKR2	PKR2_HUMAN	Q8NFJ6	A_23_P412603	-0.358884	7.11753	-2.38171	0.0301001	0.775433	1
ENSG00000205277	MUC12	MUC12_HUMAN	Q9UKN1	A_24_P798028	-0.327011	7.04134	-2.38163	0.0301049	0.775433	1
ENSG00000139116	KIF21A	KI21A_HUMAN	Q7Z4S6	A_24_P366315	-0.256558	10.3312	-2.38112	0.0301354	0.775433	1
ENSG00000135930	EIF4E2	IF4E2_HUMAN	O60573	A_23_P165722	-0.298845	14.7904	-2.38045	0.0301756	0.775433	1
ENSG00000107937	GTPBP4	NOG1_HUMAN	Q9BZE4	A_32_P115947	0.259535	10.0077	2.38025	0.0301871	0.775433	1
ENSG00000177283	FZD8	FZD8_HUMAN	Q9H461	A_23_P396858	0.345088	11.9983	2.37998	0.0302036	0.775433	1
ENSG00000091262	ABCC6	MRP6_HUMAN	O95255	A_23_P15272	-0.302693	8.57196	-2.37921	0.0302495	0.775433	1
ENSG00000256340	-	-	-	A_23_P15272	-0.302693	8.57196	-2.37921	0.0302495	0.775433	1
ENSG00000162885	B3GALNT2	B3GL2_HUMAN	Q8NCR0	A_24_P212531	-0.217462	8.02927	-2.37913	0.0302545	0.775433	1
ENSG00000159140	SON	SON_HUMAN	P18583	A_23_P211099	0.280782	12.8895	2.37904	0.0302597	0.775433	1
ENSG00000115866	DARS	SYDC_HUMAN	P14868	A_23_P108415	-0.27952	14.0071	-2.37897	0.0302642	0.775433	1
ENSG00000180155	LYNX1	LYNX1_HUMAN	Q9BZG9	A_23_P257672	0.3991	11.4696	2.3785	0.030292	0.775433	1
ENSG00000170858	-	-	-	A_23_P27781	0.238687	7.48292	2.37841	0.0302974	0.775433	1
ENSG00000168070	C11orf85	CK085_HUMAN	Q3KP22	A_32_P112293	-0.394069	7.00785	-2.37774	0.0303378	0.775433	1
ENSG00000235485	-	-	-	A_24_P628797	-0.396111	6.94746	-2.37751	0.0303514	0.775433	1
ENSG00000204219	TCEA3	TCEA3_HUMAN	O75764	A_23_P34376	-0.225203	7.24851	-2.3765	0.0304121	0.775433	1
ENSG00000170677	SOCS6	SOCS6_HUMAN	O14544	A_24_P91272	0.305905	9.46853	2.37603	0.0304405	0.775433	1
ENSG00000178882	FAM101A	F101A_HUMAN	Q6ZTI6	A_24_P288890	0.335123	7.41222	2.3755	0.0304726	0.775433	1
ENSG00000168582	CRYGA	CRGA_HUMAN	P11844	A_23_P165380	-0.227551	7.20017	-2.37509	0.0304974	0.775433	1
ENSG00000169704	GP9	GPIX_HUMAN	P14770	A_23_P33256	0.310645	10.1512	2.37406	0.0305594	0.775433	1
ENSG00000260229	-	-	-	A_24_P341476	-0.267905	15.5445	-2.37405	0.0305604	0.775433	1
ENSG00000151332	MBIP	MBIP1_HUMAN	Q9NS73	A_23_P2922	0.252244	10.4376	2.37372	0.0305803	0.775433	1
ENSG00000235644	-	-	-	A_32_P725839	0.305661	8.01306	2.37334	0.0306032	0.775433	1
ENSG00000151366	NDUFC2	NDUC2_HUMAN	O95298	A_24_P364236	0.226929	9.02514	2.37308	0.030619	0.775433	1
ENSG00000235710	-	-	-	A_23_P355418	0.275649	6.90397	2.37295	0.030627	0.775433	1
ENSG00000224057	-	-	-	A_32_P133395	-0.317964	7.05316	-2.3726	0.0306482	0.775433	1
ENSG00000110768	GTF2H1	TF2H1_HUMAN	P32780	A_23_P36183	0.237528	10.1666	2.37252	0.0306531	0.775433	1
ENSG00000176714	CCDC121	CC121_HUMAN	Q6ZUS5	A_24_P319684	0.28874	7.19432	2.3723	0.0306664	0.775433	1
ENSG00000128833	MYO5C	MYO5C_HUMAN	Q9NQX4	A_23_P140434	0.280913	9.39612	2.37194	0.0306883	0.775433	1
ENSG00000144401	METTL21A	MT21A_HUMAN	Q8WXB1	A_24_P162929	-0.226516	10.9814	-2.37125	0.0307301	0.775433	1
ENSG00000130182	ZSCAN10	ZSC10_HUMAN	Q96SZ4	A_23_P15135	0.243229	13.4861	2.3706	0.0307696	0.775433	1
ENSG00000125871	MGME1	MGME1_HUMAN	Q9BQP7	A_24_P254285	-0.285637	9.6944	-2.37008	0.0308013	0.775433	1
ENSG00000179029	TMEM107	TM107_HUMAN	Q6UX40	A_24_P284353	-0.281542	11.9138	-2.36887	0.0308753	0.775433	1
ENSG00000259849	-	-	-	A_24_P254762	-0.428933	6.99184	-2.36855	0.030895	0.775433	1
ENSG00000137133	HINT2	HINT2_HUMAN	Q9BX68	A_23_P157784	-0.269604	11.3724	-2.36708	0.030985	0.775433	1
ENSG00000248487	ABHD14A	ABHEA_HUMAN	Q9BUJ0	A_23_P69267	-0.239984	9.67738	-2.36659	0.0310146	0.775433	1
ENSG00000197182	-	-	-	A_24_P264383	0.446695	10.1796	2.36626	0.031035	0.775433	1
ENSG00000276293	PIP4K2B	PI42B_HUMAN	P78356	A_23_P362207	0.274861	8.31865	2.36584	0.0310608	0.775433	1
ENSG00000158161	EYA3	EYA3_HUMAN	Q99504	A_24_P122658	-0.240936	7.10332	-2.36569	0.0310701	0.775433	1
ENSG00000213864	-	-	-	A_24_P212726	0.26771	13.5545	2.36533	0.0310924	0.775433	1
ENSG00000124232	RBPJL	RBPJL_HUMAN	Q9UBG7	A_23_P346884	-0.331965	6.93823	-2.3653	0.0310938	0.775433	1
ENSG00000168300	PCMTD1	PCMD1_HUMAN	Q96MG8	A_32_P203500	-0.265493	8.84239	-2.36431	0.0311547	0.775433	1
ENSG00000187902	SHISA7	SHSA7_HUMAN	A6NL88	A_24_P161581	0.230437	8.02663	2.36375	0.0311892	0.775433	1
ENSG00000059145	UNKL	UNKL_HUMAN	Q9H9P5	A_24_P374675	-0.23162	7.12577	-2.36344	0.0312087	0.775433	1
ENSG00000121413	ZSCAN18	ZSC18_HUMAN	Q8TBC5	A_24_P920880	-0.319185	8.08556	-2.36336	0.0312134	0.775433	1
ENSG00000086232	EIF2AK1	E2AK1_HUMAN	Q9BQI3	A_23_P251173	-0.387393	11.5519	-2.3623	0.0312791	0.775433	1
ENSG00000182010	RTKN2	RTKN2_HUMAN	Q8IZC4	A_24_P13041	-0.314984	8.48359	-2.36217	0.0312869	0.775433	1
ENSG00000138587	MNS1	MNS1_HUMAN	Q8NEH6	A_23_P3302	-0.295249	8.3251	-2.36191	0.0313034	0.775433	1
ENSG00000175697	GPR156	GP156_HUMAN	Q8NFN8	A_23_P92275	0.239013	8.21752	2.36035	0.0313997	0.775433	1
ENSG00000113389	NPR3	ANPRC_HUMAN	P17342	A_23_P327451	-0.311397	6.97104	-2.36009	0.0314157	0.775433	1
ENSG00000239570	-	-	-	A_32_P118481	0.318325	7.75892	2.35999	0.0314221	0.775433	1
ENSG00000179526	SHARPIN	SHRPN_HUMAN	Q9H0F6	A_23_P94942	-0.2295	11.2172	-2.35996	0.031424	0.775433	1
ENSG00000163141	BNIPL	BNIPL_HUMAN	Q7Z465	A_24_P85850	0.28582	6.95207	2.3599	0.0314281	0.775433	1
ENSG00000137343	ATAT1	ATAT_HUMAN	Q5SQI0	A_23_P70509	-0.314965	7.4806	-2.35901	0.0314832	0.775433	1
ENSG00000103550	KNOP1	KNOP1_HUMAN	Q1ED39	A_32_P178537	-0.269008	8.92876	-2.3588	0.0314959	0.775433	1
ENSG00000148225	WDR31	WDR31_HUMAN	Q8NA23	A_23_P251324	-0.257993	7.28402	-2.35868	0.0315037	0.775433	1
ENSG00000166188	ZNF319	ZN319_HUMAN	Q9P2F9	A_23_P26314	0.255294	8.17884	2.35858	0.0315096	0.775433	1
ENSG00000173218	VANGL1	VANG1_HUMAN	Q8TAA9	A_23_P103795	0.304771	12.2119	2.35791	0.0315513	0.775433	1
ENSG00000198312	-	-	-	A_24_P690983	0.25358	11.1222	2.35771	0.0315643	0.775433	1
ENSG00000237238	-	-	-	A_24_P690983	0.25358	11.1222	2.35771	0.0315643	0.775433	1
ENSG00000231701	-	-	-	A_24_P690983	0.25358	11.1222	2.35771	0.0315643	0.775433	1
ENSG00000224599	-	-	-	A_24_P690983	0.25358	11.1222	2.35771	0.0315643	0.775433	1
ENSG00000225883	-	-	-	A_24_P690983	0.25358	11.1222	2.35771	0.0315643	0.775433	1
ENSG00000115525	ST3GAL5	SIAT9_HUMAN	Q9UNP4	A_23_P136573	-0.243379	8.92119	-2.35712	0.0316011	0.775433	1
ENSG00000196449	YRDC	YRDC_HUMAN	Q86U90	A_23_P62840	0.297511	12.3581	2.35684	0.0316182	0.775433	1
ENSG00000183166	CALN1	CABP8_HUMAN	Q9BXU9	A_23_P147698	-0.270531	7.96897	-2.35623	0.0316564	0.775433	1
ENSG00000128595	CALU	CALU_HUMAN	O43852	A_23_P122815	-0.303397	12.2543	-2.35531	0.0317142	0.775433	1
ENSG00000129347	KRI1	KRI1_HUMAN	Q8N9T8	A_23_P101332	-0.333504	11.934	-2.35527	0.0317167	0.775433	1
ENSG00000188321	ZNF559	ZN559_HUMAN	Q9BR84	A_24_P284584	0.286934	7.50818	2.35515	0.0317244	0.775433	1
ENSG00000172260	NEGR1	NEGR1_HUMAN	Q7Z3B1	A_23_P396800	-0.336679	7.02845	-2.35307	0.0318547	0.775433	1
ENSG00000186842	-	-	-	A_24_P202905	0.244518	7.04465	2.35298	0.0318602	0.775433	1
ENSG00000114491	UMPS	UMPS_HUMAN	P11172	A_23_P6624	0.262654	12.3957	2.35294	0.0318632	0.775433	1
ENSG00000070501	POLB	DPOLB_HUMAN	P06746	A_24_P928772	-0.313237	7.08275	-2.3525	0.0318907	0.775433	1
ENSG00000090615	GOLGA3	GOGA3_HUMAN	Q08378	A_23_P203819	0.267348	10.6952	2.35229	0.0319039	0.775433	1
ENSG00000275221	HIST1H2AG	H2A1_HUMAN	P0C0S8	A_24_P217848	-0.382102	13.7816	-2.35206	0.0319185	0.775433	1
ENSG00000275221	HIST1H2AI	H2A1_HUMAN	P0C0S8	A_24_P217848	-0.382102	13.7816	-2.35206	0.0319185	0.775433	1
ENSG00000275221	HIST1H2AK	H2A1_HUMAN	P0C0S8	A_24_P217848	-0.382102	13.7816	-2.35206	0.0319185	0.775433	1
ENSG00000275221	HIST1H2AL	H2A1_HUMAN	P0C0S8	A_24_P217848	-0.382102	13.7816	-2.35206	0.0319185	0.775433	1
ENSG00000275221	HIST1H2AM	H2A1_HUMAN	P0C0S8	A_24_P217848	-0.382102	13.7816	-2.35206	0.0319185	0.775433	1
ENSG00000115266	APC2	APC2_HUMAN	O95996	A_24_P878992	0.359562	8.87532	2.35145	0.0319565	0.775433	1
ENSG00000013583	HEBP1	HEBP1_HUMAN	Q9NRV9	A_23_P117082	-0.417976	11.3438	-2.35138	0.0319612	0.775433	1
ENSG00000180611	MB21D2	M21D2_HUMAN	Q8IYB1	A_32_P117464	0.282697	9.45027	2.35037	0.032025	0.775433	1
ENSG00000177338	-	-	-	A_24_P229871	0.235794	7.41896	2.34972	0.0320663	0.775433	1
ENSG00000138606	SHF	SHF_HUMAN	Q7M4L6	A_32_P183904	-0.347398	9.14846	-2.34968	0.0320689	0.775433	1
ENSG00000158427	TMSB15B	TB15B_HUMAN	P0CG35	A_23_P96599	0.417772	12.4739	2.34966	0.0320697	0.775433	1
ENSG00000269226	TMSB15B	TB15B_HUMAN	P0CG35	A_23_P96599	0.417772	12.4739	2.34966	0.0320697	0.775433	1
ENSG00000171617	ENC1	ENC1_HUMAN	O14682	A_24_P69095	0.368634	10.0427	2.34865	0.0321338	0.775433	1
ENSG00000162670	BRINP3	BRNP3_HUMAN	Q76B58	A_23_P103812	0.260243	6.94043	2.34851	0.032143	0.775433	1
ENSG00000161021	MAML1	MAML1_HUMAN	Q92585	A_23_P110606	-0.214404	9.30609	-2.34846	0.0321459	0.775433	1
ENSG00000156471	PTDSS1	PTSS1_HUMAN	P48651	A_23_P168868	-0.273957	13.3249	-2.3484	0.0321496	0.775433	1
ENSG00000153201	RANBP2	RBP2_HUMAN	P49792	A_23_P131664	0.249663	12.2549	2.34826	0.032159	0.775433	1
ENSG00000266028	SRGAP2	-	-	A_32_P15498	-0.434497	10.0587	-2.34772	0.0321927	0.775433	1
ENSG00000196369	SRGAP2B	SRG2B_HUMAN	P0DMP2	A_32_P15498	-0.434497	10.0587	-2.34772	0.0321927	0.775433	1
ENSG00000171943	SRGAP2C	SRG2C_HUMAN	P0DJJ0	A_32_P15498	-0.434497	10.0587	-2.34772	0.0321927	0.775433	1
ENSG00000120049	KCNIP2	KCIP2_HUMAN	Q9NS61	A_24_P12998	0.234969	7.00691	2.34723	0.0322241	0.775433	1
ENSG00000185442	FAM174B	F174B_HUMAN	Q3ZCQ3	A_23_P100001	-0.216763	12.9231	-2.3463	0.0322836	0.775433	1
ENSG00000187504	-	-	-	A_24_P349636	0.195213	15.8954	2.34591	0.0323083	0.775433	1
ENSG00000262117	-	-	-	A_32_P106933	-0.338224	7.09571	-2.34579	0.0323161	0.775433	1
ENSG00000114739	ACVR2B	AVR2B_HUMAN	Q13705	A_23_P109950	-0.24135	11.1682	-2.34568	0.0323229	0.775433	1
ENSG00000130939	UBE4B	UBE4B_HUMAN	O95155	A_23_P201279	-0.310717	11.3751	-2.34536	0.0323433	0.775433	1
ENSG00000171055	DKFZp779C2259	FEZ2_HUMAN	Q9UHY8	A_24_P918296	0.350508	6.98854	2.34516	0.0323559	0.775433	1
ENSG00000171055	FEZ2	FEZ2_HUMAN	Q9UHY8	A_24_P918296	0.350508	6.98854	2.34516	0.0323559	0.775433	1
ENSG00000196208	GREB1	GREB1_HUMAN	Q4ZG55	A_23_P329768	0.26088	8.89675	2.34445	0.0324012	0.775433	1
ENSG00000135424	ITGA7	ITA7_HUMAN	Q13683	A_23_P128084	-0.379818	12.7398	-2.34388	0.0324382	0.775433	1
ENSG00000189410	SH2D5	SH2D5_HUMAN	Q6ZV89	A_24_P686965	-0.35989	10.7394	-2.34365	0.0324528	0.775433	1
ENSG00000182463	TSHZ2	TSH2_HUMAN	Q9NRE2	A_32_P221096	0.236415	7.11643	2.34363	0.0324536	0.775433	1
ENSG00000149792	MRPL49	RM49_HUMAN	Q13405	A_24_P201491	-0.26518	12.6405	-2.34361	0.0324552	0.775433	1
ENSG00000144406	UNC80	UNC80_HUMAN	Q8N2C7	A_32_P447785	-0.23237	6.91828	-2.34349	0.0324628	0.775433	1
ENSG00000177731	FLII	FLII_HUMAN	Q13045	A_23_P4425	-0.259339	12.3655	-2.3434	0.0324686	0.775433	1
ENSG00000258227	CLEC5A	CLC5A_HUMAN	Q9NY25	A_24_P175156	0.301361	6.98622	2.3434	0.0324687	0.775433	1
ENSG00000188483	IER5L	IER5L_HUMAN	Q5T953	A_24_P383450	-0.367676	9.03781	-2.34314	0.032485	0.775433	1
ENSG00000124226	RNF114	RN114_HUMAN	Q9Y508	A_24_P82957	0.276791	9.63934	2.34228	0.0325403	0.775433	1
ENSG00000240065	PSMB9	PSB9_HUMAN	P28065	A_23_P111000	0.242932	8.56397	2.34114	0.0326138	0.775433	1
ENSG00000164187	LMBRD2	LMBD2_HUMAN	Q68DH5	A_32_P8952	-0.241233	7.41223	-2.34093	0.0326269	0.775433	1
ENSG00000064651	SLC12A2	S12A2_HUMAN	P55011	A_23_P133606	0.263308	8.15155	2.34076	0.0326379	0.775433	1
ENSG00000204637	-	-	-	A_24_P195205	0.292284	8.51047	2.3406	0.0326486	0.775433	1
ENSG00000164022	AIMP1	AIMP1_HUMAN	Q12904	A_23_P121686	0.228942	12.0459	2.3402	0.0326739	0.775433	1
ENSG00000124102	PI3	ELAF_HUMAN	P19957	A_23_P210465	0.27763	7.34507	2.33992	0.0326921	0.775433	1
ENSG00000224706	-	-	-	A_24_P332504	0.351789	8.92681	2.33952	0.0327177	0.775433	1
ENSG00000160194	NDUFV3	NDUV3_HUMAN	P56181	A_23_P211285	-0.316359	13.4097	-2.33941	0.0327252	0.775433	1
ENSG00000029534	ANK1	ANK1_HUMAN	P16157	A_23_P216108	-0.325058	8.14711	-2.33921	0.0327383	0.775433	1
ENSG00000128310	GALR3	GALR3_HUMAN	O60755	A_23_P256663	0.267719	14.2546	2.33916	0.0327414	0.775433	1
ENSG00000131653	TRAF7	TRAF7_HUMAN	Q6Q0C0	A_24_P53150	0.242614	10.035	2.33895	0.0327547	0.775433	1
ENSG00000164830	OXR1	OXR1_HUMAN	Q8N573	A_24_P163632	-0.281232	7.64173	-2.33887	0.0327597	0.775433	1
ENSG00000229919	-	-	-	A_24_P83544	0.34547	9.95223	2.33886	0.0327609	0.775433	1
ENSG00000184182	UBE2F	UBE2F_HUMAN	Q969M7	A_23_P39561	0.262612	11.0002	2.33852	0.0327822	0.775433	1
ENSG00000182383	-	-	-	A_24_P358578	0.240501	14.2879	2.33807	0.032812	0.775433	1
ENSG00000219201	-	-	-	A_32_P182662	0.233918	9.99978	2.3374	0.032855	0.775433	1
ENSG00000186063	AIDA	AIDA_HUMAN	Q96BJ3	A_32_P182662	0.233918	9.99978	2.3374	0.032855	0.775433	1
ENSG00000230154	-	-	-	A_32_P182662	0.233918	9.99978	2.3374	0.032855	0.775433	1
ENSG00000251429	-	-	-	A_32_P182662	0.233918	9.99978	2.3374	0.032855	0.775433	1
ENSG00000275713	HIST1H2BH	H2B1H_HUMAN	Q93079	A_23_P366216	-0.227636	13.1087	-2.33739	0.0328558	0.775433	1
ENSG00000264190	-	-	-	A_23_P432077	-0.277372	7.89908	-2.33724	0.0328654	0.775433	1
ENSG00000102763	VWA8	VWA8_HUMAN	A3KMH1	A_23_P432077	-0.277372	7.89908	-2.33724	0.0328654	0.775433	1
ENSG00000146054	TRIM7	TRIM7_HUMAN	Q9C029	A_24_P286190	-0.240723	7.42168	-2.33684	0.0328915	0.775433	1
ENSG00000248514	-	-	-	A_24_P286190	-0.240723	7.42168	-2.33684	0.0328915	0.775433	1
ENSG00000131828	PDHA1	ODPA_HUMAN	P08559	A_23_P251095	0.266176	13.88	2.33667	0.0329025	0.775433	1
ENSG00000118307	CASC1	CASC1_HUMAN	Q6TDU7	A_23_P95231	-0.307351	7.21299	-2.33659	0.0329072	0.775433	1
ENSG00000155542	SETD9	SETD9_HUMAN	Q8NE22	A_23_P433111	0.22313	9.67745	2.33613	0.0329374	0.775433	1
ENSG00000138092	CENPO	CENPO_HUMAN	Q9BU64	A_24_P276888	-0.309078	9.99559	-2.33548	0.0329795	0.775433	1
ENSG00000089053	ANAPC5	APC5_HUMAN	Q9UJX4	A_23_P204448	-0.260468	13.8935	-2.3353	0.0329915	0.775433	1
ENSG00000056998	GYG2	GLYG2_HUMAN	O15488	A_23_P217704	-0.258115	10.229	-2.33522	0.0329962	0.775433	1
ENSG00000089177	KIF16B	KI16B_HUMAN	Q96L93	A_23_P17503	0.258563	8.88297	2.33507	0.0330064	0.775433	1
ENSG00000188636	LDOC1L	LDOCL_HUMAN	Q6ICC9	A_23_P132365	0.207212	11.5302	2.33506	0.0330067	0.775433	1
ENSG00000172007	RAB33B	RB33B_HUMAN	Q9H082	A_23_P9565	0.337859	7.05118	2.33362	0.0331007	0.775433	1
ENSG00000134108	ARL8B	ARL8B_HUMAN	Q9NVJ2	A_23_P385217	0.264279	11.3234	2.33357	0.033104	0.775433	1
ENSG00000160014	CALM1	CALM_HUMAN	P62158	A_23_P4944	-0.276564	13.3265	-2.33328	0.0331228	0.775433	1
ENSG00000160014	CALM2	CALM_HUMAN	P62158	A_23_P4944	-0.276564	13.3265	-2.33328	0.0331228	0.775433	1
ENSG00000160014	CALM3	CALM_HUMAN	P62158	A_23_P4944	-0.276564	13.3265	-2.33328	0.0331228	0.775433	1
ENSG00000169876	MUC17	MUC17_HUMAN	Q685J3	A_24_P247643	0.23415	7.03494	2.33326	0.033124	0.775433	1
ENSG00000181991	MRPS11	RT11_HUMAN	P82912	A_24_P913666	-0.317511	8.16492	-2.33302	0.0331399	0.775433	1
ENSG00000278849	-	-	-	A_32_P104772	0.303983	6.93424	2.33279	0.0331548	0.775433	1
ENSG00000055917	PUM2	PUM2_HUMAN	Q8TB72	A_24_P71439	-0.273442	9.7504	-2.33263	0.033165	0.775433	1
ENSG00000162419	GMEB1	GMEB1_HUMAN	Q9Y692	A_23_P137586	-0.282705	10.46	-2.3326	0.0331674	0.775433	1
ENSG00000053254	FOXN3	FOXN3_HUMAN	O00409	A_32_P152882	-0.26721	7.37647	-2.33198	0.0332078	0.775433	1
ENSG00000118705	RPN2	RPN2_HUMAN	P04844	A_23_P108994	-0.267393	12.4121	-2.33172	0.0332246	0.775433	1
ENSG00000225051	-	-	-	A_24_P24685	-0.279092	11.1094	-2.33164	0.0332303	0.775433	1
ENSG00000272442	-	-	-	A_23_P312874	-0.211138	6.95011	-2.33069	0.033292	0.775433	1
ENSG00000249481	SPATS1	SPAS1_HUMAN	Q496A3	A_23_P312874	-0.211138	6.95011	-2.33069	0.033292	0.775433	1
ENSG00000131263	RLIM	RNF12_HUMAN	Q9NVW2	A_23_P148484	0.330961	9.95527	2.33046	0.0333073	0.775433	1
ENSG00000110148	CCKBR	GASR_HUMAN	P32239	A_23_P162010	-0.228147	14.9301	-2.33039	0.0333118	0.775433	1
ENSG00000100647	KIAA0247	K0247_HUMAN	Q92537	A_23_P371787	-0.244558	10.1692	-2.33013	0.0333291	0.775433	1
ENSG00000116128	BCL9	BCL9_HUMAN	O00512	A_23_P382602	-0.351197	9.26621	-2.32995	0.0333408	0.775433	1
ENSG00000102104	RS1	XLRS1_HUMAN	O15537	A_23_P354855	-0.280437	7.0106	-2.32936	0.0333794	0.775433	1
ENSG00000132313	MRPL35	-	-	A_24_P97221	-0.23519	11.3959	-2.32929	0.0333842	0.775433	1
ENSG00000164258	NDUFS4	NDUS4_HUMAN	O43181	A_23_P257198	-0.23115	13.4707	-2.32917	0.0333919	0.775433	1
ENSG00000110395	CBL	CBL_HUMAN	P22681	A_23_P339191	-0.305905	12.8207	-2.32907	0.0333984	0.775433	1
ENSG00000140297	GCNT3	GCNT3_HUMAN	O95395	A_23_P151915	0.347224	7.46789	2.32835	0.0334462	0.775433	1
ENSG00000105185	PDCD5	PDCD5_HUMAN	O14737	A_24_P339611	0.269549	12.9314	2.32755	0.0334987	0.775433	1
ENSG00000272602	DKFZp313E1411	-	-	A_23_P155939	0.293244	8.93324	2.32715	0.0335249	0.775433	1
ENSG00000272602	ZNF595	-	-	A_23_P155939	0.293244	8.93324	2.32715	0.0335249	0.775433	1
ENSG00000169217	CD2BP2	CD2B2_HUMAN	O95400	A_24_P236522	-0.245516	10.5344	-2.32693	0.0335394	0.775433	1
ENSG00000143742	SRP9	SRP09_HUMAN	P49458	A_24_P66528	0.243139	11.6933	2.3269	0.0335418	0.775433	1
ENSG00000180581	-	-	-	A_24_P66528	0.243139	11.6933	2.3269	0.0335418	0.775433	1
ENSG00000172869	DMXL1	DMXL1_HUMAN	Q9Y485	A_24_P101128	-0.236717	7.24847	-2.32683	0.0335466	0.775433	1
ENSG00000159363	ATP13A2	AT132_HUMAN	Q9NQ11	A_23_P12423	-0.295018	10.7313	-2.32611	0.0335936	0.775433	1
ENSG00000224023	-	-	-	A_32_P406028	-0.239162	7.22519	-2.32596	0.0336039	0.775433	1
ENSG00000178795	GDPD4	GDPD4_HUMAN	Q6W3E5	A_24_P49896	-0.247834	7.08536	-2.32574	0.0336181	0.775433	1
ENSG00000166747	AP1G1	AP1G1_HUMAN	O43747	A_24_P381962	-0.227681	10.703	-2.32552	0.0336332	0.775433	1
ENSG00000167460	TPM4	TPM4_HUMAN	P67936	A_32_P28284	-0.246726	14.0549	-2.32544	0.0336383	0.775433	1
ENSG00000213846	-	-	-	A_32_P28284	-0.246726	14.0549	-2.32544	0.0336383	0.775433	1
ENSG00000097007	ABL1	ABL1_HUMAN	P00519	A_24_P393711	-0.312519	7.64411	-2.32515	0.0336572	0.775433	1
ENSG00000107816	LZTS2	LZTS2_HUMAN	Q9BRK4	A_23_P149852	-0.396503	12.2294	-2.32509	0.0336615	0.775433	1
ENSG00000168546	GFRA2	GFRA2_HUMAN	O00451	A_24_P96505	0.263046	7.08204	2.3247	0.0336874	0.775433	1
ENSG00000136754	ABI1	ABI1_HUMAN	Q8IZP0	A_23_P126992	0.249207	10.7161	2.3247	0.0336875	0.775433	1
ENSG00000215452	-	-	-	A_24_P44992	0.291294	6.97093	2.32465	0.0336903	0.775433	1
ENSG00000197183	NOL4L	NOL4L_HUMAN	Q96MY1	A_24_P118938	-0.206142	7.66608	-2.32464	0.0336909	0.775433	1
ENSG00000166265	CYYR1	CYYR1_HUMAN	Q96J86	A_23_P17620	-0.355415	9.89827	-2.32414	0.0337241	0.775433	1
ENSG00000119392	GLE1	GLE1_HUMAN	Q53GS7	A_23_P258367	-0.249261	7.60255	-2.32337	0.0337756	0.775433	1
ENSG00000114019	AMOTL2	AMOL2_HUMAN	Q9Y2J4	A_23_P166686	0.389511	13.8006	2.32326	0.0337831	0.775433	1
ENSG00000197601	FAR1	FACR1_HUMAN	Q8WVX9	A_24_P278460	0.294598	9.58944	2.32256	0.0338293	0.775433	1
ENSG00000196743	GM2A	SAP3_HUMAN	P17900	A_23_P144872	-0.231849	8.88391	-2.32182	0.0338788	0.775433	1
ENSG00000009335	UBE3C	UBE3C_HUMAN	Q15386	A_23_P59481	-0.232081	10.2948	-2.32174	0.0338839	0.775433	1
ENSG00000132204	-	-	-	A_23_P153128	0.24858	6.77366	2.32155	0.0338965	0.775433	1
ENSG00000124356	STAMBP	STABP_HUMAN	O95630	A_24_P585747	-0.239655	7.89177	-2.32105	0.0339298	0.775433	1
ENSG00000213798	-	-	-	A_24_P75778	0.347056	8.50009	2.32102	0.0339323	0.775433	1
ENSG00000177570	SAMD12	SAM12_HUMAN	Q8N8I0	A_32_P92355	-0.301283	7.27633	-2.32097	0.0339355	0.775433	1
ENSG00000237172	B3GNT9	B3GN9_HUMAN	Q6UX72	A_23_P379736	-0.379275	10.2583	-2.31991	0.0340063	0.775433	1
ENSG00000131148	EMC8	EMC8_HUMAN	O43402	A_23_P106859	-0.295971	13.2162	-2.3199	0.0340067	0.775433	1
ENSG00000213619	NDUFS3	NDUS3_HUMAN	O75489	A_23_P75402	-0.253927	13.1347	-2.31959	0.0340279	0.775433	1
ENSG00000102554	KLF5	KLF5_HUMAN	Q13887	A_24_P210406	-0.315222	10.0671	-2.31919	0.0340543	0.775433	1
ENSG00000077942	FBLN1	FBLN1_HUMAN	P23142	A_23_P211631	-0.325351	13.0858	-2.31864	0.0340915	0.775433	1
ENSG00000101773	RBBP8	COM1_HUMAN	Q99708	A_23_P252371	0.219287	10.4004	2.31855	0.0340974	0.775433	1
ENSG00000100532	CGRRF1	CGRF1_HUMAN	Q99675	A_23_P37275	0.222653	10.0155	2.31847	0.034103	0.775433	1
ENSG00000130520	LSM4	LSM4_HUMAN	Q9Y4Z0	A_24_P224776	-0.289475	12.8617	-2.3184	0.0341072	0.775433	1
ENSG00000174628	IQCK	IQCK_HUMAN	Q8N0W5	A_32_P35847	-0.285101	8.21987	-2.31836	0.0341103	0.775433	1
ENSG00000183434	TFDP3	TFDP3_HUMAN	Q5H9I0	A_23_P10518	0.284308	7.26189	2.31835	0.0341107	0.775433	1
ENSG00000161664	ASB16	ASB16_HUMAN	Q96NS5	A_24_P56837	0.287162	7.76722	2.31779	0.0341485	0.775433	1
ENSG00000255370	-	-	-	A_24_P272073	0.258806	9.7078	2.31735	0.0341777	0.775433	1
ENSG00000100592	DAAM1	DAAM1_HUMAN	Q9Y4D1	A_24_P347447	0.30595	11.574	2.31733	0.0341792	0.775433	1
ENSG00000147113	CXorf36	DIA1R_HUMAN	Q9H7Y0	A_23_P346390	-0.39202	7.08599	-2.31724	0.0341854	0.775433	1
ENSG00000223904	-	-	-	A_24_P16273	0.367563	7.10912	2.3169	0.0342081	0.775433	1
ENSG00000120129	DUSP1	DUS1_HUMAN	P28562	A_23_P110712	0.280942	9.12065	2.31686	0.0342105	0.775433	1
ENSG00000229009	-	-	-	A_24_P881562	0.236262	7.09925	2.31667	0.0342237	0.775433	1
ENSG00000135956	TMEM127	TM127_HUMAN	O75204	A_24_P80181	0.221225	10.6254	2.31661	0.0342277	0.775433	1
ENSG00000179256	SMCO3	SMCO3_HUMAN	A2RU48	A_24_P66969	0.378603	7.00221	2.31644	0.0342392	0.775433	1
ENSG00000165406	39508	MARH8_HUMAN	Q5T0T0	A_23_P419277	0.292963	7.63086	2.31592	0.0342742	0.775433	1
ENSG00000117707	PROX1	PROX1_HUMAN	Q92786	A_24_P88266	0.377801	7.01872	2.31586	0.0342779	0.775433	1
ENSG00000119688	ABCD4	ABCD4_HUMAN	O14678	A_23_P37327	0.215654	11.3276	2.31583	0.0342803	0.775433	1
ENSG00000241146	-	-	-	A_24_P333112	0.243003	14.0113	2.31572	0.0342877	0.775433	1
ENSG00000185264	TEX33	TEX33_HUMAN	O43247	A_23_P353149	0.301791	7.00438	2.31551	0.0343019	0.775433	1
ENSG00000103160	HSDL1	HSDL1_HUMAN	Q3SXM5	A_23_P206324	0.23296	8.8299	2.31545	0.0343058	0.775433	1
ENSG00000204913	LRRC3C	LRR3C_HUMAN	A6NJW4	A_24_P935608	0.245481	6.93	2.31534	0.0343128	0.775433	1
ENSG00000119927	GPAM	GPAT1_HUMAN	Q9HCL2	A_24_P227069	-0.220573	10.0137	-2.31512	0.0343281	0.775433	1
ENSG00000213269	-	-	-	A_24_P307205	0.241729	15.2405	2.31437	0.0343786	0.775433	1
ENSG00000260882	-	-	-	A_24_P409309	-0.285008	7.39649	-2.31411	0.034396	0.775433	1
ENSG00000173295	-	-	-	A_24_P409309	-0.285008	7.39649	-2.31411	0.034396	0.775433	1
ENSG00000010310	GIPR	GIPR_HUMAN	P48546	A_24_P373768	0.248348	7.71739	2.31375	0.0344209	0.775433	1
ENSG00000237949	-	-	-	A_32_P160294	0.227509	7.03117	2.31366	0.0344263	0.775433	1
ENSG00000145832	SLC25A48	S2548_HUMAN	Q6ZT89	A_23_P7719	0.195036	7.3105	2.31338	0.0344454	0.775433	1
ENSG00000156411	C14orf2	68MP_HUMAN	P56378	A_23_P205281	-0.305088	13.8143	-2.31334	0.0344486	0.775433	1
ENSG00000156411	MP68	68MP_HUMAN	P56378	A_23_P205281	-0.305088	13.8143	-2.31334	0.0344486	0.775433	1
ENSG00000102221	JADE3	JADE3_HUMAN	Q92613	A_23_P11362	-0.25366	7.26266	-2.31322	0.0344567	0.775433	1
ENSG00000247134	-	-	-	A_32_P121549	-0.254475	10.4468	-2.31299	0.034472	0.775433	1
ENSG00000186474	KLK12	KLK12_HUMAN	Q9UKR0	A_23_P500010	0.285809	7.03846	2.31238	0.0345132	0.775433	1
ENSG00000126461	SCAF1	SFR19_HUMAN	Q9H7N4	A_24_P117672	-0.262604	9.5598	-2.31228	0.0345202	0.775433	1
ENSG00000203705	TATDN3	TATD3_HUMAN	Q17R31	A_23_P23522	0.208066	9.60935	2.31225	0.0345221	0.775433	1
ENSG00000168461	RAB31	RAB31_HUMAN	Q13636	A_23_P141688	-0.376985	11.1105	-2.31193	0.0345441	0.775433	1
ENSG00000167419	LPO	PERL_HUMAN	P22079	A_23_P100583	-0.255972	6.99383	-2.31175	0.0345561	0.775433	1
ENSG00000148925	BTBD10	BTBDA_HUMAN	Q9BSF8	A_23_P13438	0.251501	10.1334	2.31148	0.0345747	0.775433	1
ENSG00000053770	AP5M1	AP5M1_HUMAN	Q9H0R1	A_23_P37265	0.23043	10.9867	2.31122	0.0345922	0.775433	1
ENSG00000221909	FAM200A	F200A_HUMAN	Q8TCP9	A_23_P168812	-0.265235	8.49568	-2.31108	0.0346016	0.775433	1
ENSG00000173210	ABLIM3	ABLM3_HUMAN	O94929	A_32_P153505	0.234381	8.07547	2.31096	0.0346096	0.775433	1
ENSG00000077713	SLC25A43	S2543_HUMAN	Q8WUT9	A_23_P125668	0.239467	8.04225	2.30994	0.0346792	0.775433	1
ENSG00000136240	KDELR2	ERD22_HUMAN	P33947	A_24_P42517	0.258832	11.9169	2.30973	0.0346937	0.775433	1
ENSG00000115109	EPB41L5	E41L5_HUMAN	Q9HCM4	A_23_P209298	0.229088	9.03567	2.30933	0.0347211	0.775433	1
ENSG00000272918	-	-	-	A_32_P160216	-0.21492	7.30346	-2.30871	0.0347634	0.775433	1
ENSG00000143321	HDGF	HDGF_HUMAN	P51858	A_24_P376707	-0.264899	13.224	-2.30857	0.0347726	0.775433	1
ENSG00000182022	CHST15	CHSTF_HUMAN	Q7LFX5	A_23_P383986	0.225961	9.75554	2.30852	0.034776	0.775433	1
ENSG00000183783	KCTD8	KCTD8_HUMAN	Q6ZWB6	A_23_P94902	0.247474	7.41093	2.30847	0.0347797	0.775433	1
ENSG00000181619	GPR135	GP135_HUMAN	Q8IZ08	A_23_P410736	-0.235039	7.56474	-2.30828	0.0347926	0.775433	1
ENSG00000147687	TATDN1	TATD1_HUMAN	Q6P1N9	A_32_P224911	0.229294	10.6131	2.30793	0.0348167	0.775433	1
ENSG00000234369	-	-	-	A_32_P224911	0.229294	10.6131	2.30793	0.0348167	0.775433	1
ENSG00000110074	FOXRED1	FXRD1_HUMAN	Q96CU9	A_23_P35883	-0.264682	9.49797	-2.30762	0.0348379	0.775433	1
ENSG00000260426	-	-	-	A_32_P49124	-0.349776	7.13207	-2.3074	0.0348524	0.775433	1
ENSG00000129675	ARHGEF6	ARHG6_HUMAN	Q15052	A_24_P228875	-0.25991	7.20469	-2.30716	0.0348692	0.775433	1
ENSG00000228434	-	-	-	A_32_P92281	-0.247936	7.8523	-2.3066	0.0349076	0.775433	1
ENSG00000167555	ZNF528	ZN528_HUMAN	Q3MIS6	A_23_P414713	0.227715	8.35328	2.30615	0.0349384	0.775433	1
ENSG00000165097	AOF1	KDM1B_HUMAN	Q8NB78	A_23_P338401	-0.265406	7.20173	-2.30563	0.0349739	0.775433	1
ENSG00000165097	KDM1B	KDM1B_HUMAN	Q8NB78	A_23_P338401	-0.265406	7.20173	-2.30563	0.0349739	0.775433	1
ENSG00000120805	ARL1	ARL1_HUMAN	P40616	A_32_P68586	0.210696	11.3253	2.30431	0.035065	0.775433	1
ENSG00000168135	KCNJ4	KCNJ4_HUMAN	P48050	A_24_P6125	0.274395	7.14634	2.30374	0.0351037	0.775433	1
ENSG00000145428	RNF175	RN175_HUMAN	Q8N4F7	A_24_P196428	0.323485	6.87804	2.30312	0.0351468	0.775433	1
ENSG00000176834	VSIG10	VSI10_HUMAN	Q8N0Z9	A_32_P105162	0.225426	7.01056	2.30306	0.0351511	0.775433	1
ENSG00000151135	TMEM263	TM263_HUMAN	Q8WUH6	A_23_P410613	0.246695	10.8747	2.30288	0.0351633	0.775433	1
ENSG00000135074	ADAM19	ADA19_HUMAN	Q9H013	A_23_P81369	-0.276021	8.35544	-2.30264	0.0351801	0.775433	1
ENSG00000267029	-	-	-	A_32_P28158	-0.226392	7.58469	-2.30241	0.035196	0.775433	1
ENSG00000260091	-	-	-	A_32_P28158	-0.226392	7.58469	-2.30241	0.035196	0.775433	1
ENSG00000119559	C19orf25	CS025_HUMAN	Q9UFG5	A_24_P373885	-0.235254	9.98423	-2.30234	0.0352005	0.775433	1
ENSG00000138796	HADH	HCDH_HUMAN	Q16836	A_23_P167227	-0.272017	12.5253	-2.30204	0.0352216	0.775433	1
ENSG00000138758	40787	SEP11_HUMAN	Q9NVA2	A_32_P11425	0.362099	11.9323	2.30136	0.0352687	0.775433	1
ENSG00000213672	NCKIPSD	SPN90_HUMAN	Q9NZQ3	A_23_P29638	-0.247761	8.8022	-2.30069	0.0353149	0.775433	1
ENSG00000239857	GET4	GET4_HUMAN	Q7L5D6	A_23_P42836	-0.223381	12.2866	-2.29964	0.0353877	0.775433	1
ENSG00000164828	SUN1	SUN1_HUMAN	O94901	A_23_P42836	-0.223381	12.2866	-2.29964	0.0353877	0.775433	1
ENSG00000134317	GRHL1	GRHL1_HUMAN	Q9NZI5	A_23_P365785	-0.382865	7.25552	-2.29919	0.0354185	0.775433	1
ENSG00000070501	POLB	DPOLB_HUMAN	P06746	A_32_P34552	0.293816	8.95371	2.29842	0.0354725	0.775433	1
ENSG00000229036	-	-	-	A_24_P320597	0.38817	8.31039	2.29838	0.0354749	0.775433	1
ENSG00000130957	FBP2	F16P2_HUMAN	O00757	A_23_P94472	0.263303	7.03423	2.29816	0.0354905	0.775433	1
ENSG00000243107	-	-	-	A_24_P98161	0.303245	7.09202	2.29803	0.0354996	0.775433	1
ENSG00000001631	KRIT1	KRIT1_HUMAN	O00522	A_24_P98161	0.303245	7.09202	2.29803	0.0354996	0.775433	1
ENSG00000171388	APLN	APEL_HUMAN	Q9ULZ1	A_24_P404822	0.252505	8.27205	2.29789	0.035509	0.775433	1
ENSG00000163053	SLC16A14	MOT14_HUMAN	Q7RTX9	A_23_P131394	-0.386217	7.33555	-2.29759	0.0355304	0.775433	1
ENSG00000226284	-	-	-	A_23_P28797	0.218411	12.9627	2.29738	0.035545	0.775433	1
ENSG00000213318	-	-	-	A_24_P238386	0.369682	7.83112	2.29719	0.0355578	0.775433	1
ENSG00000136045	PWP1	PWP1_HUMAN	Q13610	A_23_P105753	0.237282	10.2173	2.29657	0.0356012	0.775433	1
ENSG00000231234	-	-	-	A_24_P566701	0.239965	11.1769	2.29657	0.0356013	0.775433	1
ENSG00000272772	-	-	-	A_24_P566701	0.239965	11.1769	2.29657	0.0356013	0.775433	1
ENSG00000113558	SKP1	SKP1_HUMAN	P63208	A_24_P566701	0.239965	11.1769	2.29657	0.0356013	0.775433	1
ENSG00000260809	-	-	-	A_24_P846755	-0.229787	9.08441	-2.29647	0.0356082	0.775433	1
ENSG00000167910	CYP7A1	CP7A1_HUMAN	P22680	A_23_P146198	-0.326059	6.96223	-2.29604	0.0356385	0.775433	1
ENSG00000083290	ULK2	ULK2_HUMAN	Q8IYT8	A_24_P932594	-0.292247	7.18126	-2.29574	0.0356593	0.775433	1
ENSG00000144468	RHBDD1	RHBL4_HUMAN	Q8TEB9	A_24_P134834	0.261634	8.52386	2.29569	0.035663	0.775433	1
ENSG00000066629	EML1	EMAL1_HUMAN	O00423	A_32_P219845	0.301132	8.25412	2.2956	0.0356691	0.775433	1
ENSG00000259674	-	-	-	A_24_P178723	0.273936	8.10253	2.29521	0.0356961	0.775433	1
ENSG00000178836	-	-	-	A_32_P221507	-0.297229	7.01223	-2.29458	0.0357403	0.775433	1
ENSG00000128641	MYO1B	MYO1B_HUMAN	O43795	A_23_P361049	0.228967	10.7766	2.29434	0.0357572	0.775433	1
ENSG00000164256	PRDM9	PRDM9_HUMAN	Q9NQV7	A_23_P7612	0.239595	7.18285	2.29396	0.035784	0.775433	1
ENSG00000279090	-	-	-	A_32_P78705	0.307956	7.01274	2.29385	0.035792	0.775433	1
ENSG00000160360	GPSM1	GPSM1_HUMAN	Q86YR5	A_32_P215938	-0.268852	13.0752	-2.29367	0.0358045	0.775433	1
ENSG00000179387	ELMOD2	ELMD2_HUMAN	Q8IZ81	A_23_P7282	0.250811	11.876	2.29358	0.035811	0.775433	1
ENSG00000116254	CHD5	CHD5_HUMAN	Q8TDI0	A_23_P385263	0.266267	6.96949	2.29321	0.0358364	0.775433	1
ENSG00000071054	MAP4K4	-	-	A_24_P157165	-0.209764	8.63796	-2.29246	0.0358894	0.775433	1
ENSG00000124374	PAIP2B	PAI2B_HUMAN	Q9ULR5	A_24_P860797	-0.302475	10.3869	-2.29229	0.0359013	0.775433	1
ENSG00000163803	PLB1	PLB1_HUMAN	Q6P1J6	A_24_P379616	-0.211271	6.81403	-2.29205	0.0359185	0.775433	1
ENSG00000141551	CSNK1D	KC1D_HUMAN	P48730	A_24_P318544	0.228981	12.5402	2.29162	0.0359483	0.775433	1
ENSG00000072682	P4HA2	P4HA2_HUMAN	O15460	A_23_P30363	0.266218	10.0309	2.29159	0.0359504	0.775433	1
ENSG00000182747	SLC35D3	S35D3_HUMAN	Q5M8T2	A_24_P392970	0.391501	7.13631	2.29098	0.0359935	0.775433	1
ENSG00000110063	DCPS	DCPS_HUMAN	Q96C86	A_23_P52738	0.20085	11.3533	2.29096	0.0359948	0.775433	1
ENSG00000262528	-	-	-	A_24_P848662	0.499714	11.6649	2.29058	0.0360221	0.775433	1
ENSG00000078902	TOLLIP	TOLIP_HUMAN	Q9H0E2	A_24_P287189	0.279957	7.37269	2.29012	0.0360541	0.775433	1
ENSG00000071127	WDR1	WDR1_HUMAN	O75083	A_23_P502913	0.203147	13.1248	2.28994	0.0360673	0.775433	1
ENSG00000171456	ASXH1	ASXL1_HUMAN	Q8IXJ9	A_24_P19337	-0.237978	9.8657	-2.28975	0.0360807	0.775433	1
ENSG00000171456	ASXL1	ASXL1_HUMAN	Q8IXJ9	A_24_P19337	-0.237978	9.8657	-2.28975	0.0360807	0.775433	1
ENSG00000132781	MUTYH	MUTYH_HUMAN	Q9UIF7	A_23_P51660	-0.38757	12.0966	-2.28916	0.0361224	0.775433	1
ENSG00000279989	-	-	-	A_23_P304511	0.263706	8.15254	2.28914	0.0361238	0.775433	1
ENSG00000186812	ZNF397	ZN397_HUMAN	Q8NF99	A_23_P304511	0.263706	8.15254	2.28914	0.0361238	0.775433	1
ENSG00000167775	CD320	CD320_HUMAN	Q9NPF0	A_23_P119698	-0.220399	12.7286	-2.28867	0.0361569	0.775433	1
ENSG00000136933	RABEPK	RABEK_HUMAN	Q7Z6M1	A_24_P386323	0.288552	11.9419	2.28865	0.036158	0.775433	1
ENSG00000178694	NSUN3	NSUN3_HUMAN	Q9H649	A_32_P213822	-0.253067	7.99888	-2.28832	0.0361817	0.775433	1
ENSG00000231890	-	-	-	A_32_P164088	-0.37205	7.12519	-2.2881	0.036197	0.775433	1
ENSG00000142192	APP	A4_HUMAN	P05067	A_24_P314159	-0.25563	11.2357	-2.28781	0.0362176	0.775433	1
ENSG00000174844	DNAH12	DYH12_HUMAN	Q6ZR08	A_24_P169402	-0.241366	7.02153	-2.2872	0.036261	0.775433	1
ENSG00000151233	GXYLT1	GXLT1_HUMAN	Q4G148	A_32_P62342	-0.215532	9.446	-2.28615	0.0363359	0.775433	1
ENSG00000164845	-	-	-	A_32_P160039	0.22023	10.3522	2.28585	0.0363575	0.775433	1
ENSG00000076928	ARHGEF1	ARHG1_HUMAN	Q92888	A_24_P202581	-0.250166	8.56579	-2.28508	0.0364119	0.775433	1
ENSG00000082641	NFE2L1	NF2L1_HUMAN	Q14494	A_24_P219552	-0.255475	13.1993	-2.28505	0.0364145	0.775433	1
ENSG00000132661	NXT1	NXT1_HUMAN	Q9UKK6	A_23_P251695	-0.32184	12.0185	-2.28488	0.0364264	0.775433	1
ENSG00000118990	-	-	-	A_24_P126741	0.264199	9.48246	2.28482	0.0364302	0.775433	1
ENSG00000033867	SLC4A7	S4A7_HUMAN	Q9Y6M7	A_23_P132468	-0.337928	9.9119	-2.28467	0.0364415	0.775433	1
ENSG00000182841	-	-	-	A_24_P83158	-0.207475	10.5147	-2.28451	0.0364524	0.775433	1
ENSG00000186510	CLCNKA	CLCKA_HUMAN	P51800	A_24_P2361	-0.306819	7.56975	-2.28437	0.036463	0.775433	1
ENSG00000166452	AKIP1	AKIP1_HUMAN	Q9NQ31	A_23_P53152	0.259402	10.852	2.2842	0.0364751	0.775433	1
ENSG00000006831	ADIPOR2	ADR2_HUMAN	Q86V24	A_23_P48121	0.216156	11.4489	2.28415	0.0364781	0.775433	1
ENSG00000185222	WBP5	WBP5_HUMAN	Q9UHQ7	A_23_P34142	0.263723	12.683	2.28396	0.036492	0.775433	1
ENSG00000274641	HIST1H2BO	H2B1O_HUMAN	P23527	A_23_P59069	-0.239106	12.675	-2.2835	0.0365245	0.775433	1
ENSG00000126524	SBDS	SBDS_HUMAN	Q9Y3A5	A_23_P70867	0.27564	9.90613	2.28314	0.0365506	0.775433	1
ENSG00000143390	RFX5	RFX5_HUMAN	P48382	A_24_P20032	0.186851	10.1894	2.28274	0.0365794	0.775433	1
ENSG00000172167	MTBP	MTBP_HUMAN	Q96DY7	A_23_P357794	-0.18957	7.70745	-2.28205	0.0366287	0.775433	1
ENSG00000161939	RNASEK-C17orf49	-	-	A_24_P205230	-0.263733	13.3648	-2.28203	0.0366303	0.775433	1
ENSG00000219200	RNASEK	RNK_HUMAN	Q6P5S7	A_24_P205230	-0.263733	13.3648	-2.28203	0.0366303	0.775433	1
ENSG00000140406	MESDC1	MESD1_HUMAN	Q9H1K6	A_23_P99891	-0.322403	12.0874	-2.28104	0.0367008	0.775433	1
ENSG00000162148	PPP1R32	PPR32_HUMAN	Q7Z5V6	A_23_P98571	0.238589	7.12772	2.281	0.0367039	0.775433	1
ENSG00000178163	ZNF518B	Z518B_HUMAN	Q9C0D4	A_32_P144421	0.24578	10.2297	2.28093	0.0367088	0.775433	1
ENSG00000259751	-	-	-	A_24_P749042	0.335893	10.8306	2.28084	0.0367152	0.775433	1
ENSG00000021776	AQR	AQR_HUMAN	O60306	A_24_P749042	0.335893	10.8306	2.28084	0.0367152	0.775433	1
ENSG00000075673	ATP12A	AT12A_HUMAN	P54707	A_23_P87982	-0.343422	8.80325	-2.28066	0.0367282	0.775433	1
ENSG00000088756	ARHGAP28	RHG28_HUMAN	Q9P2N2	A_23_P130359	-0.358708	11.4729	-2.27997	0.0367783	0.775433	1
ENSG00000085365	SCAMP1	SCAM1_HUMAN	O15126	A_23_P110787	-0.277967	8.55828	-2.27987	0.036785	0.775433	1
ENSG00000177992	SPATA31E1	S31E1_HUMAN	Q6ZUB1	A_23_P427180	-0.270944	7.0635	-2.27933	0.0368244	0.775433	1
ENSG00000138663	COPS4	CSN4_HUMAN	Q9BT78	A_23_P43779	0.201072	11.7841	2.27922	0.0368323	0.775433	1
ENSG00000118985	ELL2	ELL2_HUMAN	O00472	A_23_P41645	0.439306	11.907	2.27908	0.0368419	0.775433	1
ENSG00000170852	KBTBD2	KBTB2_HUMAN	Q8IY47	A_24_P12539	0.218764	9.07806	2.27869	0.0368703	0.775433	1
ENSG00000073060	SCARB1	SCRB1_HUMAN	Q8WTV0	A_23_P203900	-0.244832	13.1307	-2.2784	0.0368914	0.775433	1
ENSG00000107105	ELAVL2	ELAV2_HUMAN	Q12926	A_23_P94571	-0.25694	7.47365	-2.27801	0.0369196	0.775433	1
ENSG00000135002	RFK	RIFK_HUMAN	Q969G6	A_32_P218883	0.321119	9.75991	2.27797	0.0369221	0.775433	1
ENSG00000204610	TRIM15	TRI15_HUMAN	Q9C019	A_23_P500300	0.279172	6.96663	2.27712	0.0369836	0.775433	1
ENSG00000142549	IGLON5	IGLO5_HUMAN	A6NGN9	A_24_P271149	-0.302912	11.0975	-2.27673	0.0370117	0.775433	1
ENSG00000141873	SLC39A3	S39A3_HUMAN	Q9BRY0	A_23_P388170	-0.25536	8.42582	-2.27632	0.0370419	0.775433	1
ENSG00000231010	-	-	-	A_24_P222324	-0.367963	6.92152	-2.27591	0.037071	0.775433	1
ENSG00000232533	-	-	-	A_32_P19840	0.224676	11.8487	2.27591	0.0370713	0.775433	1
ENSG00000079332	SAR1A	SAR1A_HUMAN	Q9NR31	A_24_P158421	-0.269439	12.1224	-2.27441	0.0371804	0.775433	1
ENSG00000259394	-	-	-	A_24_P246863	0.271379	8.63333	2.27407	0.0372047	0.775433	1
ENSG00000226049	-	-	-	A_23_P38365	0.20812	11.317	2.27359	0.0372399	0.775433	1
ENSG00000146872	TLK2	TLK2_HUMAN	Q86UE8	A_23_P38365	0.20812	11.317	2.27359	0.0372399	0.775433	1
ENSG00000198870	STKLD1	STKL1_HUMAN	Q8NE28	A_24_P155196	0.255271	7.0988	2.27326	0.0372637	0.775433	1
ENSG00000123444	KBTBD4	KBTB4_HUMAN	Q9NVX7	A_23_P202696	0.29403	9.65138	2.27213	0.0373461	0.775433	1
ENSG00000214822	-	-	-	A_32_P168973	-0.361842	6.98435	-2.27213	0.0373467	0.775433	1
ENSG00000227300	-	-	-	A_32_P168973	-0.361842	6.98435	-2.27213	0.0373467	0.775433	1
ENSG00000214856	-	-	-	A_32_P168973	-0.361842	6.98435	-2.27213	0.0373467	0.775433	1
ENSG00000186832	KRT16	K1C16_HUMAN	P08779	A_32_P168973	-0.361842	6.98435	-2.27213	0.0373467	0.775433	1
ENSG00000109118	PHF12	PHF12_HUMAN	Q96QT6	A_23_P305761	0.316178	7.04824	2.27186	0.037366	0.775433	1
ENSG00000116703	PDC	PHOS_HUMAN	P20941	A_23_P23090	-0.342304	6.98833	-2.27165	0.0373812	0.775433	1
ENSG00000105699	LSR	LSR_HUMAN	Q86X29	A_23_P142389	-0.219868	10.9841	-2.27129	0.0374079	0.775433	1
ENSG00000160131	VMA21	VMA21_HUMAN	Q3ZAQ7	A_32_P151621	-0.255761	8.48383	-2.26978	0.0375184	0.775433	1
ENSG00000269095	-	-	-	A_23_P108326	-0.328577	11.2393	-2.26924	0.0375581	0.775433	1
ENSG00000160113	NR2F6	NR2F6_HUMAN	P10588	A_23_P108326	-0.328577	11.2393	-2.26924	0.0375581	0.775433	1
ENSG00000168158	OR2C1	OR2C1_HUMAN	O95371	A_23_P163737	-0.24109	7.08693	-2.26876	0.0375932	0.775433	1
ENSG00000132357	CARD6	CARD6_HUMAN	Q9BX69	A_23_P41854	0.287368	7.53119	2.26859	0.0376059	0.775433	1
ENSG00000144749	LRIG1	LRIG1_HUMAN	Q96JA1	A_23_P109636	0.329997	12.2908	2.26849	0.037613	0.775433	1
ENSG00000182814	-	-	-	A_32_P18251	0.21694	10.6704	2.26756	0.0376812	0.775433	1
ENSG00000253677	-	-	-	A_23_P145584	0.284042	9.83897	2.26744	0.0376904	0.775433	1
ENSG00000186591	UBE2H	UBE2H_HUMAN	P62256	A_23_P145584	0.284042	9.83897	2.26744	0.0376904	0.775433	1
ENSG00000183741	CBX6	CBX6_HUMAN	O95503	A_24_P370372	0.352034	10.3102	2.26734	0.0376979	0.775433	1
ENSG00000163508	EOMES	EOMES_HUMAN	O95936	A_24_P97374	0.411846	13.4496	2.26673	0.0377425	0.775433	1
ENSG00000219930	-	-	-	A_24_P676216	0.381752	8.84492	2.26627	0.0377762	0.775433	1
ENSG00000095261	PSMD5	PSMD5_HUMAN	Q16401	A_24_P363802	0.274541	10.0428	2.26598	0.0377976	0.775433	1
ENSG00000248161	-	-	-	A_24_P476215	-0.35536	7.49241	-2.26593	0.0378012	0.775433	1
ENSG00000178772	CPN2	CPN2_HUMAN	P22792	A_23_P121030	0.292142	7.62817	2.26578	0.0378125	0.775433	1
ENSG00000099250	NRP1	NRP1_HUMAN	O14786	A_24_P59327	-0.382107	6.98571	-2.2657	0.0378187	0.775433	1
ENSG00000120875	DUSP4	DUS4_HUMAN	Q13115	A_23_P134935	-0.198666	12.0796	-2.26565	0.0378221	0.775433	1
ENSG00000149100	EIF3M	EIF3M_HUMAN	Q7L2H7	A_23_P150446	-0.255594	14.9021	-2.26522	0.0378541	0.775433	1
ENSG00000101844	ATG4A	ATG4A_HUMAN	Q8WYN0	A_23_P217367	0.254345	8.03685	2.26517	0.0378579	0.775433	1
ENSG00000172638	EFEMP2	FBLN4_HUMAN	O95967	A_23_P24414	-0.381979	10.985	-2.26463	0.037898	0.775433	1
ENSG00000178974	FBXO34	FBX34_HUMAN	Q9NWN3	A_23_P117527	0.264247	11.3832	2.2644	0.0379143	0.775433	1
ENSG00000250490	-	-	-	A_24_P307724	0.31688	6.95486	2.26371	0.037966	0.775433	1
ENSG00000184502	GAST	GAST_HUMAN	P01350	A_23_P159191	-0.262953	7.22581	-2.26352	0.0379796	0.775433	1
ENSG00000106952	TNFSF8	TNFL8_HUMAN	P32971	A_23_P169257	-0.37551	7.0284	-2.2634	0.0379885	0.775433	1
ENSG00000120071	KANSL1	KANL1_HUMAN	Q7Z3B3	A_23_P55376	0.213775	10.5787	2.26328	0.0379977	0.775433	1
ENSG00000177238	TRIM72	TRI72_HUMAN	Q6ZMU5	A_24_P281194	0.206785	7.25914	2.26298	0.0380198	0.775433	1
ENSG00000197136	PCNXL3	PCX3_HUMAN	Q9H6A9	A_24_P333123	-0.211254	7.20916	-2.26283	0.0380314	0.775433	1
ENSG00000251023	-	-	-	A_23_P167464	0.240811	6.98999	2.26267	0.0380431	0.775433	1
ENSG00000212766	-	-	-	A_23_P322632	-0.33984	7.01204	-2.26246	0.0380584	0.775433	1
ENSG00000105278	ZFR2	ZFR2_HUMAN	Q9UPR6	A_23_P332713	-0.273436	7.21431	-2.26238	0.0380646	0.775433	1
ENSG00000039139	DNAH5	DYH5_HUMAN	Q8TE73	A_24_P120462	-0.3279	7.05636	-2.26123	0.0381502	0.775433	1
ENSG00000107186	MPDZ	MPDZ_HUMAN	O75970	A_23_P396328	0.247793	9.69799	2.26109	0.0381606	0.775433	1
ENSG00000115839	RAB3GAP1	RB3GP_HUMAN	Q15042	A_23_P50942	0.232377	11.1033	2.26102	0.0381659	0.775433	1
ENSG00000254470	AP5B1	AP5B1_HUMAN	Q2VPB7	A_24_P383788	-0.235241	7.86801	-2.26099	0.0381683	0.775433	1
ENSG00000115091	ACTR3	ARP3_HUMAN	P61158	A_24_P231513	0.367221	12.3558	2.26092	0.0381734	0.775433	1
ENSG00000177462	OR2T8	OR2T8_HUMAN	A6NH00	A_24_P298724	-0.333664	6.92393	-2.26088	0.038176	0.775433	1
ENSG00000097021	ACOT7	BACH_HUMAN	O00154	A_24_P205589	-0.290413	12.9902	-2.2608	0.0381819	0.775433	1
ENSG00000162849	KIF26B	KI26B_HUMAN	Q2KJY2	A_23_P387105	-0.259318	7.02994	-2.26003	0.0382393	0.775433	1
ENSG00000235098	ANKRD65	ANR65_HUMAN	E5RJM6	A_23_P86079	-0.251957	7.31191	-2.25924	0.0382983	0.775433	1
ENSG00000185873	TMPRSS11B	TM11B_HUMAN	Q86T26	A_23_P81190	0.305045	7.01329	2.25842	0.0383601	0.775433	1
ENSG00000198369	SPRED2	SPRE2_HUMAN	Q7Z698	A_24_P315535	-0.329569	7.21767	-2.25816	0.038379	0.775433	1
ENSG00000185885	IFITM1	IFM1_HUMAN	P13164	A_23_P72737	0.20424	16.9405	2.25799	0.0383918	0.775433	1
ENSG00000185201	IFITM2	IFM2_HUMAN	Q01629	A_23_P72737	0.20424	16.9405	2.25799	0.0383918	0.775433	1
ENSG00000099715	PCDH11Y	PC11Y_HUMAN	Q9BZA8	A_23_P147314	-0.298674	7.20473	-2.25778	0.0384079	0.775433	1
ENSG00000110887	DAO	OXDA_HUMAN	P14920	A_23_P139635	-0.270554	7.14259	-2.25768	0.0384152	0.775433	1
ENSG00000138375	SMARCAL1	SMAL1_HUMAN	Q9NZC9	A_23_P131337	0.210601	10.3046	2.25741	0.0384357	0.775433	1
ENSG00000138074	SLC5A6	SC5A6_HUMAN	Q9Y289	A_23_P102508	-0.340665	11.6661	-2.2573	0.0384435	0.775433	1
ENSG00000138074	SMVT	SC5A6_HUMAN	Q9Y289	A_23_P102508	-0.340665	11.6661	-2.2573	0.0384435	0.775433	1
ENSG00000166927	MS4A7	MS4A7_HUMAN	Q9GZW8	A_23_P203351	-0.26953	7.04437	-2.25721	0.0384507	0.775433	1
ENSG00000107036	RIC1	RIC1_HUMAN	Q4ADV7	A_23_P134994	0.279186	9.09068	2.25705	0.0384624	0.775433	1
ENSG00000113552	GNPDA1	GNPI1_HUMAN	P46926	A_23_P144622	-0.277194	9.91249	-2.25638	0.0385129	0.775433	1
ENSG00000101670	LIPG	LIPE_HUMAN	Q9Y5X9	A_23_P78405	0.276866	7.70315	2.2562	0.0385267	0.775433	1
ENSG00000167920	TMEM99	TMM99_HUMAN	Q8N816	A_32_P32835	0.271536	10.9522	2.25588	0.0385507	0.775433	1
ENSG00000102001	CACNA1F	CAC1F_HUMAN	O60840	A_23_P148327	-0.205775	6.94837	-2.25585	0.0385529	0.775433	1
ENSG00000125735	TNFSF14	TNF14_HUMAN	O43557	A_24_P237036	0.454795	6.90101	2.25584	0.0385534	0.775433	1
ENSG00000262106	-	-	-	A_24_P887805	-0.2968	7.03356	-2.25584	0.0385537	0.775433	1
ENSG00000171115	GIMAP8	GIMA8_HUMAN	Q8ND71	A_23_P168388	-0.31413	7.08565	-2.25563	0.0385691	0.775433	1
ENSG00000081177	EXD2	EXD2_HUMAN	Q9NVH0	A_23_P205296	-0.241139	7.81856	-2.2551	0.0386088	0.775433	1
ENSG00000173818	ENDOV	ENDOV_HUMAN	Q8N8Q3	A_24_P361457	0.281091	7.21028	2.25452	0.0386531	0.775433	1
ENSG00000145649	GZMA	GRAA_HUMAN	P12544	A_23_P133445	-0.207198	7.4671	-2.25391	0.0386985	0.775433	1
ENSG00000077782	FGFR1	FGFR1_HUMAN	P11362	A_23_P315131	-0.300332	7.69837	-2.25371	0.0387137	0.775433	1
ENSG00000173540	GMPPB	GMPPB_HUMAN	Q9Y5P6	A_23_P306655	-0.214358	9.20706	-2.2533	0.0387451	0.775433	1
ENSG00000176020	AMIGO3	AMGO3_HUMAN	Q86WK7	A_23_P306655	-0.214358	9.20706	-2.2533	0.0387451	0.775433	1
ENSG00000164256	PRDM9	PRDM9_HUMAN	Q9NQV7	A_24_P217628	0.396439	7.00211	2.25316	0.0387554	0.775433	1
ENSG00000126856	PRDM7	PRDM7_HUMAN	Q9NQW5	A_24_P217628	0.396439	7.00211	2.25316	0.0387554	0.775433	1
ENSG00000126856	PRDM7_V2	PRDM7_HUMAN	Q9NQW5	A_24_P217628	0.396439	7.00211	2.25316	0.0387554	0.775433	1
ENSG00000130921	C12orf65	CL065_HUMAN	Q9H3J6	A_32_P11899	-0.338872	9.87832	-2.25272	0.0387886	0.775433	1
ENSG00000177453	NIM1K	NIM1_HUMAN	Q8IY84	A_23_P254863	-0.265138	6.9399	-2.25265	0.0387937	0.775433	1
ENSG00000273044	-	-	-	A_32_P159528	0.298962	7.09452	2.25258	0.0387991	0.775433	1
ENSG00000109189	USP46	UBP46_HUMAN	P62068	A_23_P110386	-0.266794	7.0357	-2.25211	0.038835	0.775433	1
ENSG00000257611	-	-	-	A_24_P101812	0.249947	6.94342	2.25175	0.038862	0.775433	1
ENSG00000157837	SPPL3	SPPL3_HUMAN	Q8TCT6	A_24_P30567	-0.263331	9.93224	-2.25122	0.0389024	0.775433	1
ENSG00000188011	RTP5	RTP5_HUMAN	Q14D33	A_24_P197284	0.341974	7.00463	2.25101	0.0389182	0.775433	1
ENSG00000172346	CSDC2	CSDC2_HUMAN	Q9Y534	A_23_P320095	0.347136	10.1262	2.25092	0.0389252	0.775433	1
ENSG00000103528	SYT17	SYT17_HUMAN	Q9BSW7	A_23_P163697	0.230358	9.85396	2.25077	0.0389362	0.775433	1
ENSG00000144401	METTL21A	MT21A_HUMAN	Q8WXB1	A_24_P854913	-0.252534	10.2872	-2.25067	0.0389443	0.775433	1
ENSG00000184900	SUMO3	SUMO3_HUMAN	P55854	A_23_P102937	0.249295	11.8224	2.24961	0.0390245	0.775433	1
ENSG00000140694	PARN	PARN_HUMAN	O95453	A_24_P147190	-0.310726	9.02836	-2.24915	0.0390599	0.775433	1
ENSG00000274829	PARN	PARN_HUMAN	O95453	A_24_P147190	-0.310726	9.02836	-2.24915	0.0390599	0.775433	1
ENSG00000196277	GRM7	GRM7_HUMAN	Q14831	A_32_P165974	0.300459	7.23055	2.24879	0.0390872	0.775433	1
ENSG00000153822	KCNJ16	KCJ16_HUMAN	Q9NPI9	A_23_P501193	0.260167	7.26461	2.24864	0.0390984	0.775433	1
ENSG00000260078	-	-	-	A_24_P221968	-0.383494	6.97374	-2.24823	0.0391296	0.775433	1
ENSG00000159788	RGS12	RGS12_HUMAN	O14924	A_24_P33705	-0.209176	7.53703	-2.24817	0.0391346	0.775433	1
ENSG00000060237	WNK1	-	-	A_23_P84587	-0.29667	8.83397	-2.24804	0.0391443	0.775433	1
ENSG00000078668	VDAC3	VDAC3_HUMAN	Q9Y277	A_23_P60069	0.282122	12.657	2.2478	0.0391623	0.775433	1
ENSG00000119912	IDE	IDE_HUMAN	P14735	A_24_P928038	0.196371	10.5958	2.24765	0.0391739	0.775433	1
ENSG00000267396	-	-	-	A_32_P132060	-0.240542	7.11187	-2.24742	0.0391913	0.775433	1
ENSG00000150510	FAM124A	F124A_HUMAN	Q86V42	A_23_P344568	0.23483	10.1587	2.24701	0.0392226	0.775433	1
ENSG00000257925	-	-	-	A_24_P830361	0.322191	6.93868	2.24669	0.0392473	0.775433	1
ENSG00000151553	FAM160B1	F16B1_HUMAN	Q5W0V3	A_32_P26895	-0.266226	10.9354	-2.24661	0.0392533	0.775433	1
ENSG00000084693	AGBL5	CBPC5_HUMAN	Q8NDL9	A_23_P154466	-0.252351	11.7319	-2.24512	0.0393677	0.775433	1
ENSG00000108242	CYP2C18	CP2CI_HUMAN	P33260	A_23_P52480	0.301244	7.00715	2.24505	0.0393732	0.775433	1
ENSG00000171634	BPTF	BPTF_HUMAN	Q12830	A_24_P392475	0.237007	10.4417	2.24495	0.0393805	0.775433	1
ENSG00000230292	-	-	-	A_32_P48506	0.360884	6.85592	2.24486	0.0393873	0.775433	1
ENSG00000110237	ARHGEF17	ARHGH_HUMAN	Q96PE2	A_23_P76015	0.255652	10.057	2.2448	0.0393917	0.775433	1
ENSG00000189195	BTBD8	BTBD8_HUMAN	Q5XKL5	A_24_P564030	-0.229449	7.1929	-2.2447	0.0393994	0.775433	1
ENSG00000162913	C1orf145	CA145_HUMAN	Q96MR7	A_32_P203126	-0.330625	7.05796	-2.2447	0.0393994	0.775433	1
ENSG00000112031	MTRF1L	RF1ML_HUMAN	Q9UGC7	A_23_P214882	0.207525	8.43421	2.24467	0.0394017	0.775433	1
ENSG00000180015	-	-	-	A_23_P214882	0.207525	8.43421	2.24467	0.0394017	0.775433	1
ENSG00000110583	NAA40	NAA40_HUMAN	Q86UY6	A_23_P35782	-0.30964	8.63551	-2.2446	0.0394072	0.775433	1
ENSG00000162949	CAPN13	CAN13_HUMAN	Q6MZZ7	A_24_P336983	-0.257928	10.0469	-2.24425	0.0394339	0.775433	1
ENSG00000151320	AKAP6	AKAP6_HUMAN	Q13023	A_23_P14343	0.220578	7.20353	2.24421	0.0394374	0.775433	1
ENSG00000157193	LRP8	LRP8_HUMAN	Q14114	A_23_P34325	-0.255567	9.75032	-2.24412	0.039444	0.775433	1
ENSG00000213176	-	-	-	A_24_P238426	0.232437	16.6125	2.24403	0.0394512	0.775433	1
ENSG00000214022	REPIN1	REPI1_HUMAN	Q9BWE0	A_23_P145619	-0.262929	12.9219	-2.24365	0.0394802	0.775433	1
ENSG00000125375	ATP5S	ATP5S_HUMAN	Q99766	A_24_P118231	-0.323056	9.85155	-2.24364	0.0394814	0.775433	1
ENSG00000143549	TPM3	TPM3_HUMAN	P06753	A_24_P67364	0.339504	9.03296	2.24358	0.0394855	0.775433	1
ENSG00000261635	-	-	-	A_24_P67364	0.339504	9.03296	2.24358	0.0394855	0.775433	1
ENSG00000273656	-	-	-	A_32_P92654	-0.350624	11.5474	-2.24336	0.0395029	0.775433	1
ENSG00000198237	-	-	-	A_32_P92654	-0.350624	11.5474	-2.24336	0.0395029	0.775433	1
ENSG00000277606	-	-	-	A_32_P92654	-0.350624	11.5474	-2.24336	0.0395029	0.775433	1
ENSG00000278019	-	-	-	A_32_P92654	-0.350624	11.5474	-2.24336	0.0395029	0.775433	1
ENSG00000273799	-	-	-	A_32_P92654	-0.350624	11.5474	-2.24336	0.0395029	0.775433	1
ENSG00000278562	-	-	-	A_32_P92654	-0.350624	11.5474	-2.24336	0.0395029	0.775433	1
ENSG00000235558	-	-	-	A_32_P92654	-0.350624	11.5474	-2.24336	0.0395029	0.775433	1
ENSG00000183666	-	-	-	A_32_P92654	-0.350624	11.5474	-2.24336	0.0395029	0.775433	1
ENSG00000254701	-	-	-	A_32_P92654	-0.350624	11.5474	-2.24336	0.0395029	0.775433	1
ENSG00000253366	-	-	-	A_32_P92654	-0.350624	11.5474	-2.24336	0.0395029	0.775433	1
ENSG00000253816	-	-	-	A_32_P92654	-0.350624	11.5474	-2.24336	0.0395029	0.775433	1
ENSG00000253203	-	-	-	A_32_P92654	-0.350624	11.5474	-2.24336	0.0395029	0.775433	1
ENSG00000276794	-	-	-	A_32_P92654	-0.350624	11.5474	-2.24336	0.0395029	0.775433	1
ENSG00000215630	-	-	-	A_32_P92654	-0.350624	11.5474	-2.24336	0.0395029	0.775433	1
ENSG00000253333	-	-	-	A_32_P92654	-0.350624	11.5474	-2.24336	0.0395029	0.775433	1
ENSG00000196302	-	-	-	A_32_P92654	-0.350624	11.5474	-2.24336	0.0395029	0.775433	1
ENSG00000241549	-	-	-	A_32_P92654	-0.350624	11.5474	-2.24336	0.0395029	0.775433	1
ENSG00000142252	GEMIN7	GEMI7_HUMAN	Q9H840	A_23_P89910	0.322692	12.2059	2.24295	0.0395345	0.775433	1
ENSG00000133627	ACTR3B	ARP3B_HUMAN	Q9P1U1	A_23_P123193	-0.399218	9.95071	-2.24239	0.0395777	0.775433	1
ENSG00000131495	NDUFA2	NDUA2_HUMAN	O43678	A_24_P12218	-0.218284	13.8463	-2.24239	0.0395777	0.775433	1
ENSG00000277264	-	-	-	A_32_P114348	-0.266277	13.5802	-2.24195	0.0396111	0.775433	1
ENSG00000253570	-	-	-	A_32_P114348	-0.266277	13.5802	-2.24195	0.0396111	0.775433	1
ENSG00000204308	RNF5	RNF5_HUMAN	Q99942	A_32_P114348	-0.266277	13.5802	-2.24195	0.0396111	0.775433	1
ENSG00000184270	HIST2H2AB	H2A2B_HUMAN	Q8IUE6	A_23_P343927	-0.232824	8.84566	-2.24191	0.0396143	0.775433	1
ENSG00000139370	SLC15A4	S15A4_HUMAN	Q8N697	A_23_P98953	-0.3568	11.7696	-2.24183	0.0396207	0.775433	1
ENSG00000107262	BAG1	BAG1_HUMAN	Q99933	A_23_P146654	-0.368453	12.1941	-2.24139	0.0396546	0.775433	1
ENSG00000170044	ZPLD1	ZPLD1_HUMAN	Q8TCW7	A_23_P432013	0.362026	7.03594	2.24097	0.0396871	0.775433	1
ENSG00000112365	ZBTB24	ZBT24_HUMAN	O43167	A_23_P134147	0.212115	9.83767	2.24067	0.03971	0.775433	1
ENSG00000137831	UACA	UACA_HUMAN	Q9BZF9	A_23_P360340	0.2413	9.01908	2.24059	0.0397162	0.775433	1
ENSG00000130584	ZBTB46	ZBT46_HUMAN	Q86UZ6	A_32_P518489	-0.200116	7.26436	-2.24055	0.0397193	0.775433	1
ENSG00000156925	ZIC3	ZIC3_HUMAN	O60481	A_23_P327910	-0.323248	12.9406	-2.2397	0.0397853	0.775433	1
ENSG00000149679	CABLES2	CABL2_HUMAN	Q9BTV7	A_32_P175321	-0.27593	10.6904	-2.23955	0.0397968	0.775433	1
ENSG00000273619	-	-	-	A_32_P175321	-0.27593	10.6904	-2.23955	0.0397968	0.775433	1
ENSG00000259259	-	-	-	A_24_P865672	0.251957	7.06269	2.23943	0.039806	0.775433	1
ENSG00000124249	KCNK15	KCNKF_HUMAN	Q9H427	A_23_P210451	0.279715	6.8835	2.23863	0.0398684	0.775433	1
ENSG00000156535	CD109	CD109_HUMAN	Q6YHK3	A_24_P55092	-0.281219	7.15413	-2.2384	0.0398859	0.775433	1
ENSG00000182952	HMGN4	HMGN4_HUMAN	O00479	A_24_P397515	-0.41454	10.6605	-2.23827	0.0398957	0.775433	1
ENSG00000186150	UBL4B	UBL4B_HUMAN	Q8N7F7	A_32_P112910	-0.333254	7.08556	-2.2382	0.0399014	0.775433	1
ENSG00000119878	CRIPT	CRIPT_HUMAN	Q9P021	A_23_P17219	-0.241697	11.3641	-2.23817	0.0399038	0.775433	1
ENSG00000170396	ZNF804A	Z804A_HUMAN	Q7Z570	A_32_P316136	-0.338115	7.01126	-2.23782	0.0399311	0.775433	1
ENSG00000184897	H1FX	H1X_HUMAN	Q92522	A_23_P96087	-0.314382	10.4311	-2.23752	0.0399545	0.775433	1
ENSG00000163110	PDLIM5	PDLI5_HUMAN	Q96HC4	A_32_P14610	0.214579	12.4184	2.23739	0.0399646	0.775433	1
ENSG00000156959	LHFPL4	LHPL4_HUMAN	Q7Z7J7	A_32_P94	-0.322034	10.6829	-2.23738	0.0399655	0.775433	1
ENSG00000180953	ST20	ST20_HUMAN	Q9HBF5	A_23_P321703	0.36578	11.6041	2.23717	0.0399817	0.775433	1
ENSG00000238923	-	-	-	A_23_P2489	-0.214561	7.41139	-2.23685	0.0400066	0.775433	1
ENSG00000111678	C12orf57	C10_HUMAN	Q99622	A_23_P2489	-0.214561	7.41139	-2.23685	0.0400066	0.775433	1
ENSG00000141068	KSR1	KSR1_HUMAN	Q8IVT5	A_24_P911112	0.328777	10.5262	2.23677	0.0400128	0.775433	1
ENSG00000125848	FLRT3	FLRT3_HUMAN	Q9NZU0	A_23_P166109	-0.259606	12.7329	-2.23653	0.0400316	0.775433	1
ENSG00000165325	CCDC67	DEUP1_HUMAN	Q05D60	A_32_P113047	-0.317998	6.98436	-2.23617	0.0400591	0.775433	1
ENSG00000080200	CRYBG3	CRBG3_HUMAN	Q68DQ2	A_24_P920851	-0.346516	7.10816	-2.23596	0.0400756	0.775433	1
ENSG00000184602	SNN	SNN_HUMAN	O75324	A_24_P30923	-0.238598	11.1909	-2.23588	0.0400817	0.775433	1
ENSG00000269711	-	-	-	A_32_P99432	-0.214027	12.9525	-2.23488	0.0401604	0.775433	1
ENSG00000181029	TRAPPC5	TPPC5_HUMAN	Q8IUR0	A_32_P99432	-0.214027	12.9525	-2.23488	0.0401604	0.775433	1
ENSG00000143515	ATP8B2	AT8B2_HUMAN	P98198	A_24_P117896	-0.285365	8.31655	-2.23468	0.0401756	0.775433	1
ENSG00000138768	USO1	USO1_HUMAN	O60763	A_23_P29855	0.296384	12.6061	2.23457	0.0401846	0.775433	1
ENSG00000162723	SLAMF9	SLAF9_HUMAN	Q96A28	A_23_P96833	0.220942	8.07938	2.23439	0.0401981	0.775433	1
ENSG00000146192	FGD2	FGD2_HUMAN	Q7Z6J4	A_24_P140788	-0.273242	7.14742	-2.23431	0.0402045	0.775433	1
ENSG00000118971	CCND2	CCND2_HUMAN	P30279	A_24_P278747	-0.380273	11.584	-2.23428	0.0402069	0.775433	1
ENSG00000142609	CFAP74	-	-	A_24_P383267	-0.31885	7.04913	-2.23423	0.0402106	0.775433	1
ENSG00000207571	-	-	-	A_23_P162355	0.267977	7.06435	2.23415	0.040217	0.775433	1
ENSG00000273049	-	-	-	A_23_P162355	0.267977	7.06435	2.23415	0.040217	0.775433	1
ENSG00000273046	-	-	-	A_23_P162355	0.267977	7.06435	2.23415	0.040217	0.775433	1
ENSG00000172789	HOXC5	HXC5_HUMAN	Q00444	A_23_P162355	0.267977	7.06435	2.23415	0.040217	0.775433	1
ENSG00000178927	C17orf62	CQ062_HUMAN	Q9BQA9	A_23_P118406	-0.211921	10.0157	-2.23384	0.0402415	0.775433	1
ENSG00000197880	MDS2	MDS2_HUMAN	Q8NDY4	A_23_P323196	-0.29622	7.02314	-2.23383	0.0402418	0.775433	1
ENSG00000139438	FAM222A	F222A_HUMAN	Q5U5X8	A_23_P128375	-0.242302	10.9444	-2.23334	0.0402804	0.775433	1
ENSG00000105732	ZNF574	ZN574_HUMAN	Q6ZN55	A_23_P89931	-0.278909	10.6666	-2.23295	0.0403112	0.775433	1
ENSG00000106031	HOXA13	HXA13_HUMAN	P31271	A_23_P31306	0.325935	6.93767	2.23267	0.0403333	0.775433	1
ENSG00000166407	LMO1	RBTN1_HUMAN	P25800	A_23_P87310	0.275892	7.61751	2.23244	0.0403507	0.775433	1
ENSG00000186446	ZNF501	ZN501_HUMAN	Q96CX3	A_24_P248741	-0.282497	7.29648	-2.23229	0.0403627	0.775433	1
ENSG00000197969	VPS13A	VP13A_HUMAN	Q96RL7	A_23_P377141	-0.286934	8.80221	-2.23226	0.0403654	0.775433	1
ENSG00000159307	SCUBE1	SCUB1_HUMAN	Q8IWY4	A_23_P211619	0.249225	6.94534	2.232	0.0403854	0.775433	1
ENSG00000169375	SIN3A	SIN3A_HUMAN	Q96ST3	A_23_P367676	-0.279237	10.9802	-2.23185	0.0403973	0.775433	1
ENSG00000185129	PURA	PURA_HUMAN	Q00577	A_23_P41755	-0.234996	11.0096	-2.23151	0.0404238	0.775433	1
ENSG00000064607	SUGP2	SUGP2_HUMAN	Q8IX01	A_24_P332926	-0.22817	10.6814	-2.2315	0.0404252	0.775433	1
ENSG00000213772	-	-	-	A_24_P213396	0.256067	14.0388	2.23135	0.0404365	0.775433	1
ENSG00000204371	EHMT2	EHMT2_HUMAN	Q96KQ7	A_24_P303390	-0.271882	8.9801	-2.23117	0.0404508	0.775433	1
ENSG00000178828	RNF186	RN186_HUMAN	Q9NXI6	A_23_P126248	-0.31154	6.97281	-2.23112	0.0404545	0.775433	1
ENSG00000275212	-	-	-	A_32_P180887	-0.241464	6.93786	-2.23106	0.0404592	0.775433	1
ENSG00000051523	CYBA	CY24A_HUMAN	P13498	A_23_P315651	-0.314922	7.10276	-2.23052	0.0405021	0.775433	1
ENSG00000204713	TRIM27	TRI27_HUMAN	P14373	A_24_P163405	-0.21356	10.7888	-2.22993	0.0405487	0.775433	1
ENSG00000132204	-	-	-	A_23_P360542	-0.237029	7.01936	-2.22987	0.040553	0.775433	1
ENSG00000256537	-	-	-	A_32_P231302	0.206711	11.3657	2.22975	0.0405628	0.775433	1
ENSG00000157020	SEC13	SEC13_HUMAN	P55735	A_23_P29555	0.289524	14.6783	2.22963	0.0405722	0.775433	1
ENSG00000109133	TMEM33	TMM33_HUMAN	P57088	A_24_P922858	-0.207519	8.13218	-2.22916	0.040609	0.775433	1
ENSG00000215386	-	-	-	A_24_P229536	0.312152	6.96535	2.22836	0.0406723	0.775433	1
ENSG00000197555	SIPA1L1	SI1L1_HUMAN	O43166	A_24_P219094	-0.223399	7.98415	-2.22827	0.0406791	0.775433	1
ENSG00000229133	-	-	-	A_24_P169378	0.28205	14.4095	2.22827	0.0406796	0.775433	1
ENSG00000087365	SF3B2	SF3B2_HUMAN	Q13435	A_23_P64083	-0.191965	13.3993	-2.22824	0.0406821	0.775433	1
ENSG00000181171	-	-	-	A_23_P322013	0.243248	7.03229	2.2281	0.0406932	0.775433	1
ENSG00000160766	-	-	-	A_23_P201035	-0.345096	10.7813	-2.22807	0.0406949	0.775433	1
ENSG00000177628	GBA	GLCM_HUMAN	P04062	A_23_P201035	-0.345096	10.7813	-2.22807	0.0406949	0.775433	1
ENSG00000154783	FGD5	FGD5_HUMAN	Q6ZNL6	A_23_P258151	-0.258971	8.55693	-2.22802	0.0406995	0.775433	1
ENSG00000122420	PTGFR	PF2R_HUMAN	P43088	A_24_P302172	-0.255221	7.04621	-2.22794	0.0407054	0.775433	1
[truncated: 39,379 more rows]
